# Supplementary material for: Global Gene Expression in Coprinopsis cinerea Meiotic Mutants Reflects Checkpoint Arrest
Source: Oxford University Press journal article supplement (doi:10.1534/g3.112.003046), 2012-10-01
Supplement: 1213_tables1.xlsx [file 1213_tables1.xlsx]

## Sheet: rad50
Supplemental Table 1 Differential expression in rad50-1
The table indicates whether or not each C. cinerea probe has significantly higher or lower transcript abundance in rad50-1 than in wild type (FDR 5%) at each time point and in the time course analysis. The cluster (Burns et al. 2010) and S. cerevisiae ortholog of each gene are also given. For genes with multiple S. cerevisiae orthologs, only one is listed.
ID	Stajich prediction	Broad Genes	up at K	down at K	up at K+3	down at K+3	up at K+6	down at K+6	up at K+9	down at K+9	up at K+12	down at K+12	up over time course	down over time course	Scer name	Scer gene	Scer function			Cluster	C. cinerea Genes
CC_OL_001_A01	blank
CC_OL_001_A02	CC_G_04508	CC1G_02843
CC_OL_001_A03	CC_G_06189	CC1G_06281													YMR260C	TIF11	Translation initiation factor eIF1A, essential protein that forms a complex with Sui1p (eIF1) and the 40S ribosomal subunit and scans for the start codon; C-terminus associates with Fun12p (eIF5B); N terminus interacts with eIF2 and eIF3
CC_OL_001_A04	CC_G_00479	CC1G_01746
CC_OL_001_A05	CC_G_03717	CC1G_03575								1					YDR225W	HTA1	Histone H2A, core histone protein required for chromatin assembly and chromosome function; one of two nearly identical subtypes (see also HTA2); DNA damage-dependent phosphorylation by Mec1p facilitates DNA repair; acetylated by Nat4p
CC_OL_001_A06	CC_G_02843	CC1G_10838													YLR229C	CDC42	Small rho-like GTPase, essential for establishment and maintenance of cell polarity; mutants have defects in the organization of actin and septins
CC_OL_001_A07	CC_G_07501	CC1G_10511								1		1		1
CC_OL_001_A08	CC_G_00748	CC1G_08613													YCR036W	RBK1	Putative ribokinase			0
CC_OL_001_A09	CC_G_03003	CC1G_02269
CC_OL_001_A10	CC_G_00538	CC1G_01764													YDR058C	TGL2	Protein with lipolytic activity towards triacylglycerols and diacylglycerols when expressed in E. coli; role in yeast lipid degradation is unclear			0
CC_OL_001_A11	CC_G_03017	CC1G_02270									1				YGR135W	PRE9	Alpha 3 subunit of the 20S proteasome, the only nonessential 20S subunit; may be replaced by the alpha 4 subunit (Pre6p) under stress conditions to create a more active proteasomal isoform			5
CC_OL_001_A12	CC_G_04267	CC1G_03340					1		1		1		1
CC_OL_001_A13	CC_G_07710	CC1G_05058								1		1			YDR353W	TRR1	Cytoplasmic thioredoxin reductase, key regulatory enzyme that determines the redox state of the thioredoxin system, which acts as a disulfide reductase system and protects cells against both oxidative and reductive stress
CC_OL_001_A14	CC_G_03100	CC1G_11987													YKL170W	MRPL38	Mitochondrial ribosomal protein of the large subunit; appears as two protein spots (YmL34 and YmL38) on two-dimensional SDS gels			4
CC_OL_001_A15	CC_A_06442	CC1G_02103													YCL045C		Protein of unknown function; green fluorescent protein (GFP)-fusion protein localizes to the ER; interacts with Gal80p; YCL045C is not an essential gene			0
CC_OL_001_A16	CC_G_00397	CC1G_01230
CC_OL_001_A17	CC_G_06229	CC1G_06306																		0
CC_OL_001_A18	CC_G_09784	CC1G_07740
CC_OL_001_A19	CC_G_04939	CC1G_10036													YLR242C	ARV1	Protein functioning in transport of glycosylphosphatidylinositol intermediates into the ER lumen; required for normal intracellular sterol distribution and for sphingolipid metabolism; similar to Nup120p and C. elegans R05H5.5 protein			0
CC_OL_001_A20	CC_G_08706	CC1G_06530									1
CC_OL_001_A21	CC_G_02545	CC1G_00324									1
CC_OL_001_A22	CC_G_01791									1
CC_OL_001_A23	CC_G_05499	CC1G_12016
CC_OL_001_A24										1		1		1
CC_OL_001_B01	CC_G_01983	CC1G_01379													YER072W	VTC1	Vacuolar transporter chaperon (VTC) involved in distributing V-ATPase and other membrane proteins; together with other VTC proteins, forms a heterotetrameric complex that associates with the SNARE Nyv1p and the V0 sector of the V-ATPase
CC_OL_001_B02	CC_G_11351	CC1G_12266
CC_OL_001_B03	CC_G_06881	CC1G_01957																		0
CC_OL_001_B04	CC_G_06403	CC1G_03728													YLR022C	SDO1	Essential protein involved in 60S ribosome maturation; ortholog of the human protein (SBDS) responsible for autosomal recessive Shwachman-Bodian-Diamond Syndrome; highly conserved across archae and eukaryotes			3
CC_OL_001_B05	CC_G_03707	CC1G_03550
CC_OL_001_B06	CC_A_08965	CC1G_10249																		0
CC_OL_001_B07	CC_G_06420	CC1G_03774													YGL171W	ROK1	ATP-dependent RNA helicase of the DEAD box family; required for 18S rRNA synthesis			3
CC_OL_001_B08	CC_G_00990	CC1G_06416									1				YLR066W	SPC3	Subunit of signal peptidase complex (Spc1p, Spc2p, Spc3p, Sec11p), which catalyzes cleavage of N-terminal signal sequences of proteins targeted to the secretory pathway; homologous to mammalian SPC22/23
CC_OL_001_B09	CC_G_06369	CC1G_03669
CC_OL_001_B10	CC_G_03713	CC1G_03564																		0
CC_OL_001_B11	CC_G_04889									1		1
CC_OL_001_B12	CC_G_00240	CC1G_01098										1			YPL111W	CAR1	Arginase, responsible for arginine degradation, expression responds to both induction by arginine and nitrogen catabolite repression; disruption enhances freeze tolerance			9
CC_OL_001_B13	CC_A_04431	CC1G_08103													YER174C	GRX4	Hydroperoxide and superoxide-radical responsive glutathione-dependent oxidoreductase; monothiol glutaredoxin subfamily member along with Grx3p and Grx5p; protects cells from oxidative damage			0
CC_OL_001_B14	CC_G_00857	CC1G_07515																		7
CC_OL_001_B15	CC_G_02291	CC1G_00209													YDR373W	FRQ1	N-myristoylated calcium-binding protein that may have a role in intracellular signaling through its regulation of the phosphatidylinositol 4-kinase Pik1p; member of the recoverin/frequenin branch of the EF-hand superfamily
CC_OL_001_B16	CC_G_09034	CC1G_10928													YBR025C	OLA1	P-loop ATPase with similarity to human OLA1 and bacterial YchF; identified as specifically interacting with the proteasome; protein levels are induced by hydrogen peroxide			3
CC_OL_001_B17	CC_G_12221	CC1G_00946													YNR035C	ARC35	Subunit of the ARP2/3 complex, which is required for the motility and integrity of cortical actin patches; required for cortical localization of calmodulin
CC_OL_001_B18	CC_A_07530	CC1G_12475																		0
CC_OL_001_B19	CC_G_00461	CC1G_01784													YOL059W	GPD2	NAD-dependent glycerol 3-phosphate dehydrogenase, homolog of Gpd1p, expression is controlled by an oxygen-independent signaling pathway required to regulate metabolism under anoxic conditions; located in cytosol and mitochondria			0
CC_OL_001_B20	CC_G_02243	CC1G_00319													YEL012W	UBC8	Ubiquitin-conjugating enzyme that negatively regulates gluconeogenesis by mediating the glucose-induced ubiquitination of fructose-1,6-bisphosphatase (FBPase); cytoplasmic enzyme that catalyzes the ubiquitination of histones in vitro			0
CC_OL_001_B21	CC_G_08165	CC1G_09834								1
CC_OL_001_B22	CC_G_02136	CC1G_01434																		0
CC_OL_001_B23	CC_G_07476	CC1G_10542
CC_OL_001_B24	CC_G_08625	CC1G_11930
CC_OL_001_C01	CC_A_05006	CC1G_04678																		0
CC_OL_001_C02	CC_G_06910	CC1G_02016													YOR223W		Putative protein of unknown function			3
CC_OL_001_C03	CC_G_00779	CC1G_08573
CC_OL_001_C04	CC_A_08026	CC1G_03855								1					YKL067W	YNK1	Nucleoside diphosphate kinase, catalyzes the transfer of gamma phosphates from nucleoside triphosphates, usually ATP, to nucleoside diphosphates by a mechanism that involves formation of an autophosphorylated enzyme intermediate			0
CC_OL_001_C05	CC_G_07675	CC1G_02182
CC_OL_001_C06	CC_G_11582	CC1G_08748																		0
CC_OL_001_C07	CC_G_07947	CC1G_06725													YMR121C	RPL15B	Protein component of the large (60S) ribosomal subunit, nearly identical to Rpl15Ap and has similarity to rat L15 ribosomal protein; binds to 5.8 S rRNA
CC_OL_001_C08	CC_G_03653	CC1G_03506																		0
CC_OL_001_C09	CC_G_08422	CC1G_02516
CC_OL_001_C10	CC_G_11827	CC1G_10100
CC_OL_001_C11	CC_G_05256	CC1G_12051
CC_OL_001_C12	CC_G_01528
CC_OL_001_C13	CC_G_01754	CC1G_04347																		0
CC_OL_001_C14	CC_G_05233	CC1G_11778						1		1											redA
CC_OL_001_C15	CC_G_07957	CC1G_06717
CC_OL_001_C16	CC_G_03522
CC_OL_001_C17	CC_A_01538	CC1G_04355													YBR084C					4
CC_OL_001_C18	CC_G_02964	CC1G_02346
CC_OL_001_C19	CC_G_08012	CC1G_12415
CC_OL_001_C20	CC_A_01520	CC1G_04396								1										2
CC_OL_001_C21	CC_G_07674	CC1G_02181
CC_OL_001_C22	CC_G_07786	CC1G_05005							1		1									3	cglII
CC_OL_001_C23	CC_G_00767	CC1G_08572
CC_OL_001_C24	CC_G_12519	CC1G_10341
CC_OL_001_D01	CC_G_03070	CC1G_02388
CC_OL_001_D02	CC_G_11999	CC1G_00988													YNL079C	TPM1	Major isoform of tropomyosin; binds to and stabilizes actin cables and filaments, which direct polarized cell growth and the distribution of several organelles; acetylated by the NatB complex and acetylated form binds actin most efficiently			0
CC_OL_001_D03	CC_G_05026	CC1G_09529
CC_OL_001_D04	CC_G_00868	CC1G_07540								1	1				YER056C	FCY2	Purine-cytosine permease, mediates purine (adenine, guanine, and hypoxanthine) and cytosine accumulation
CC_OL_001_D05	CC_G_00927	CC1G_06424													YPL222W		Putative protein of unknown function; the authentic, non-tagged protein is detected in highly purified mitochondria in high-throughput studies			0
CC_OL_001_D06	CC_G_01061	CC1G_03234																		4
CC_OL_001_D07	CC_G_09275	CC1G_07379		1
CC_OL_001_D08	CC_A_06314	CC1G_10547																		4
CC_OL_001_D09	CC_G_09842	CC1G_07331													YNL116W	DMA2	Protein involved in ubiquitin ligation; plays a role in regulating spindle position and orientation; functionally redundant with Dma1p; orthologous to human RNF8 protein, also has sequence similarity to human Chfr.			7
CC_OL_001_D10	CC_G_02427
CC_OL_001_D11	CC_G_09690	CC1G_12087													YGR215W	RSM27	Mitochondrial ribosomal protein of the small subunit			0
CC_OL_001_D12	CC_G_08121	CC1G_08358																		0
CC_OL_001_D13	CC_G_04489	CC1G_02887									1
CC_OL_001_D14	CC_G_04531	CC1G_02801										1								0
CC_OL_001_D15	CC_G_04554
CC_OL_001_D16	CC_G_04615	CC1G_02850									1									0
CC_OL_001_D17	CC_G_04616	CC1G_02851													YLR357W	RSC2	Component of the RSC chromatin remodeling complex; required for expression of mid-late sporulation-specific genes; involved in telomere maintenance
CC_OL_001_D18	CC_G_04628	CC1G_02883
CC_OL_001_D19	CC_G_01716	CC1G_04419								1
CC_OL_001_D20	CC_G_01720	CC1G_04413
CC_OL_001_D21	CC_A_01526	CC1G_04382																		0
CC_OL_001_D22	CC_G_01767	CC1G_04334																		0
CC_OL_001_D23	CC_G_01775	CC1G_04344									1				YBR287W		Protein of unknown function; green fluorescent protein (GFP)-fusion protein localizes to the ER; YBR287W is not an essential gene
CC_OL_001_D24	CC_G_01778	CC1G_04353													YDR408C	ADE8	Phosphoribosyl-glycinamide transformylase, catalyzes a step in the 'de novo' purine nucleotide biosynthetic pathway
CC_OL_001_E01	CC_G_01794	CC1G_04394													YGR020C	VMA7	Subunit F of the eight-subunit V1 peripheral membrane domain of vacuolar H+-ATPase (V-ATPase), an electrogenic proton pump found throughout the endomembrane system; required for the V1 domain to assemble onto the vacuolar membrane			0
CC_OL_001_E02	CC_G_01806	CC1G_04427													YNL330C	RPD3	Histone deacetylase; regulates transcription and silencing; plays a role in regulating Ty1 transposition			4
CC_OL_001_E03
CC_OL_001_E04	CC_G_09519	CC1G_13194													YLR142W	PUT1	Proline oxidase, nuclear-encoded mitochondrial protein involved in utilization of proline as sole nitrogen source; PUT1 transcription is induced by Put3p in the presence of proline and the absence of a preferred nitrogen source			8
CC_OL_001_E05	CC_G_04637	CC1G_13220							1											3
CC_OL_001_E06	CC_G_08643	CC1G_12192								1					YFL005W	SEC4	Secretory vesicle-associated Rab GTPase essential for exocytosis; associates with the exocyst component Sec15p and may regulate polarized delivery of transport vesicles to the exocyst at the plasma membrane
CC_OL_001_E07	CC_G_01681	CC1G_11219													YPR111W	DBF20	Ser/Thr kinase involved in late nuclear division, one of the mitotic exit network (MEN) proteins; necessary for the execution of cytokinesis
CC_OL_001_E08	CC_G_01683	CC1G_11223								1					YPR028W	YOP1	Membrane protein that interacts with Yip1p to mediate membrane traffic; overexpression results in cell death and accumulation of internal cell membranes; regulates vesicular traffic in stressed cells
CC_OL_001_E09	CC_G_01684	CC1G_11224
CC_OL_001_E10	CC_G_02684	CC1G_10279																		0
CC_OL_001_E11	CC_G_02686	CC1G_10276													YNL189W	SRP1	Karyopherin alpha homolog, forms a dimer with karyopherin beta Kap95p to mediate import of nuclear proteins, binds the nuclear localization signal of the substrate during import; may also play a role in regulation of protein degradation
CC_OL_001_E12	CC_G_06504	CC1G_13210													YBR170C	NPL4	Endoplasmic reticulum and nuclear membrane protein, forms a complex with Cdc48p and Ufd1p that recognizes ubiquitinated proteins in the endoplasmic reticulum and delivers them to the proteasome for degradation
CC_OL_001_E13	CC_G_07478	CC1G_10538													YER095W	RAD51	Strand exchange protein, forms a helical filament with DNA that searches for homology; involved in the recombinational repair of double-strand breaks in DNA during vegetative growth and meiosis; homolog of Dmc1p and bacterial RecA protein			0	rad51
CC_OL_001_E14	CC_G_07486	CC1G_10525																		0
CC_OL_001_E15	CC_G_07505	CC1G_10519
CC_OL_001_E16	CC_G_07514	CC1G_10541																		0
CC_OL_001_E17	CC_G_03497	CC1G_12658													YEL058W	PCM1	Essential N-acetylglucosamine-phosphate mutase; converts GlcNAc-6-P to GlcNAc-1-P, which is a precursor for the biosynthesis of chitin and for the formation of N-glycosylated mannoproteins and glycosylphosphatidylinositol anchors			0
CC_OL_001_E18		CC1G_12659													YBL050W	SEC17	Peripheral membrane protein required for vesicular transport between ER and Golgi and for the 'priming' step in homotypic vacuole fusion, part of the cis-SNARE complex; has similarity to alpha-SNAP				lse17
CC_OL_001_E19	CC_G_11851	CC1G_11300									1				YLL026W	HSP104	Heat shock protein that cooperates with Ydj1p (Hsp40) and Ssa1p (Hsp70) to refold and reactivate previously denatured, aggregated proteins; responsive to stresses including: heat, ethanol, and sodium arsenite; involved in [PSI+] propagation			0
CC_OL_001_E20	CC_G_11858	CC1G_11288								1					YDR025W	RPS11A	Protein component of the small (40S) ribosomal subunit; identical to Rps11Bp and has similarity to E. coli S17 and rat S11 ribosomal proteins			4
CC_OL_001_E21	CC_G_07928	CC1G_06762								1					YOR187W	TUF1	Mitochondrial translation elongation factor Tu; comprises both GTPase and guanine nucleotide exchange factor activities, while these activities are found in separate proteins in S. pombe and humans			0
CC_OL_001_E22	CC_A_06694	CC1G_06742													YJR008W		Putative protein of unknown function; expression repressed by inosine and choline in an Opi1p-dependent manner; expression induced by mild heat-stress on a non-fermentable carbon source.			0
CC_OL_001_E23	CC_G_07965	CC1G_06740													YLR150W	STM1	Protein required for optimal translation under nutrient stress; involved in TOR signaling pathway; binds G4 quadruplex and purine motif triplex nucleic acid; acts with Cdc13p to maintain telomere structure
CC_OL_001_E24	CC_G_07967	CC1G_06743													YAL017W	PSK1	One of two (see also PSK2) PAS domain containing S/T protein kinases; coordinately regulates protein synthesis and carbohydrate metabolism and storage in response to a unknown metabolite that reflects nutritional status			0
CC_OL_001_F01	CC_G_07968										1									0
CC_OL_001_F02	CC_G_07982	CC1G_06769
CC_OL_001_F03	CC_G_07984	CC1G_06774																		0
CC_OL_001_F04	CC_G_07908	CC1G_06803																		0
CC_OL_001_F05	CC_G_08002	CC1G_06811																		3
CC_OL_001_F06	CC_A_05320	CC1G_03758													YHR025W	THR1	Homoserine kinase, conserved protein required for threonine biosynthesis; expression is regulated by the GCN4-mediated general amino acid control pathway			0
CC_OL_001_F07	CC_G_06308	CC1G_03701									1									0
CC_OL_001_F08	CC_G_06390	CC1G_03707													YGR132C	PHB1	Subunit of the prohibitin complex (Phb1p-Phb2p), a 1.2 MDa ring-shaped inner mitochondrial membrane chaperone that stabilizes newly synthesized proteins; determinant of replicative life span; involved in mitochondrial segregation			2
CC_OL_001_F09	CC_G_06391	CC1G_03708									1				YNL016W	PUB1	Poly(A)+ RNA-binding protein, abundant mRNP-component protein that binds mRNA and is required for stability of a number of mRNAs; not reported to associate with polyribosomes
CC_OL_001_F10	CC_G_06392	CC1G_03710													YML001W	YPT7	GTPase; GTP-binding protein of the rab family; required for homotypic fusion event in vacuole inheritance, for endosome-endosome fusion, similar to mammalian Rab7			3
CC_OL_001_F11	CC_G_06404	CC1G_03730													YKL040C	NFU1	Protein involved in iron metabolism in mitochondria; similar to NifU, which is a protein required for the maturation of the Fe/S clusters of nitrogenase in nitrogen-fixing bacteria			0
CC_OL_001_F12	CC_G_06406	CC1G_03733						1		1
CC_OL_001_F13	CC_G_00420	CC1G_01866
CC_OL_001_F14	CC_G_00434	CC1G_01843										1			YMR189W	GCV2	P subunit of the mitochondrial glycine decarboxylase complex, required for the catabolism of glycine to 5,10-methylene-THF; expression is regulated by levels of 5,10-methylene-THF in the cytoplasm
CC_OL_001_F15	CC_G_00441	CC1G_01824													YPL109C		Putative protein of unknown function; the authentic, non-tagged protein is detected in highly purified mitochondria in high-throughput studies			0
CC_OL_001_F16	CC_A_00428	CC1G_01679																		4
CC_OL_001_F17	CC_G_00492	CC1G_01664																		0
CC_OL_001_F18	CC_G_00494	CC1G_01666					1													0
CC_OL_001_F19	CC_G_00514	CC1G_01718													YMR089C	YTA12	Component, with Afg3p, of the mitochondrial inner membrane m-AAA protease that mediates degradation of misfolded or unassembled proteins and is also required for correct assembly of mitochondrial enzyme complexes
CC_OL_001_F20	CC_G_00524	CC1G_01740													YER136W	GDI1	GDP dissociation inhibitor, regulates vesicle traffic in secretory pathways by regulating the dissociation of GDP from the Sec4/Ypt/rab family of GTP binding proteins			3
CC_OL_001_F21	CC_G_00539	CC1G_01765													YHR158C	KEL1	Protein required for proper cell fusion and cell morphology; functions in a complex with Kel2p to negatively regulate mitotic exit, interacts with Tem1p and Lte1p; localizes to regions of polarized growth; potential Cdc28p substrate			0
CC_OL_001_F22	CC_G_00541	CC1G_01770
CC_OL_001_F23	CC_G_00560	CC1G_01813													YGR112W	SHY1	Mitochondrial inner membrane protein required for assembly of cytochrome c oxidase (complex IV); associates with complex IV assembly intermediates and complex III/complex IV supercomplexes; similar to human SURF1 involved in Leigh Syndrome
CC_OL_001_F24	CC_A_00509	CC1G_01839																		0
CC_OL_001_G01	CC_G_00567	CC1G_01861													YHR063C	PAN5	2-dehydropantoate 2-reductase, part of the pantothenic acid pathway, structurally homologous to E. coli panE			0
CC_OL_001_G02	CC_A_00517	CC1G_01864																		6
CC_OL_001_G03	CC_G_05797	CC1G_06620								1					YPR006C	ICL2	2-methylisocitrate lyase of the mitochondrial matrix, functions in the methylcitrate cycle to catalyze the conversion of 2-methylisocitrate to succinate and pyruvate; ICL2 transcription is repressed by glucose and induced by ethanol
CC_OL_001_G04	CC_G_05817	CC1G_06592
CC_OL_001_G05	CC_G_05828	CC1G_06566																		3
CC_OL_001_G06	CC_G_05865	CC1G_06582																		0
CC_OL_001_G07	CC_A_01164	CC1G_00650
CC_OL_001_G08	CC_A_01177	CC1G_00634													YJR105W	ADO1	Adenosine kinase, required for the utilization of S-adenosylmethionine (AdoMet); may be involved in recycling adenosine produced through the methyl cycle
CC_OL_001_G09	CC_A_01187	CC1G_00618								1	1
CC_OL_001_G10	CC_A_01189	CC1G_00616								1	1				YGR254W	ENO1	Enolase I, a phosphopyruvate hydratase that catalyzes the conversion of 2-phosphoglycerate to phosphoenolpyruvate during glycolysis and the reverse reaction during gluconeogenesis; expression is repressed in response to glucose
CC_OL_001_G11	CC_A_01200	CC1G_00576													YKL150W	MCR1	Mitochondrial NADH-cytochrome b5 reductase, involved in ergosterol biosynthesis
CC_OL_001_G12	CC_A_01206	CC1G_00557									1
CC_OL_001_G13	CC_A_01208	CC1G_00552
CC_OL_001_G14	CC_A_01211	CC1G_00542								1
CC_OL_001_G15	CC_G_01381	CC1G_00527													YJL111W	CCT7	Subunit of the cytosolic chaperonin Cct ring complex, related to Tcp1p, required for the assembly of actin and tubulins in vivo			4
CC_OL_001_G16
CC_OL_001_G17	CC_G_01387	CC1G_00516													YOR133W	EFT1	Elongation factor 2 (EF-2), also encoded by EFT2; catalyzes ribosomal translocation during protein synthesis; contains diphthamide, the unique posttranslationally modified histidine residue specifically ADP-ribosylated by diphtheria toxin
CC_OL_001_G18	CC_G_01455	CC1G_00555													YBR208C	DUR1,2	Urea amidolyase, contains both urea carboxylase and allophanate hydrolase activities, degrades urea to CO2 and NH3; expression sensitive to nitrogen catabolite repression and induced by allophanate, an intermediate in allantoin degradation			0
CC_OL_001_G19	CC_A_01280	CC1G_00558																		3
CC_OL_001_G20	CC_G_01466	CC1G_00577													YLR113W	HOG1	Mitogen-activated protein kinase involved in osmoregulation via three independent osmosensors; mediates the recruitment and activation of RNA Pol II at Hot1p-dependent promoters; localization regulated by Ptp2p and Ptp3p
CC_OL_001_G21	CC_G_01486	CC1G_00611													YDR326C	YSP2	Protein involved in programmed cell death; mutant shows resistance to cell death induced by amiodarone or intracellular acidification			0
CC_OL_001_G22	CC_A_01313	CC1G_00637								1										4
CC_OL_001_G23	CC_G_01494	CC1G_00660									1				YBR189W	RPS9B	Protein component of the small (40S) ribosomal subunit; nearly identical to Rps9Ap and has similarity to E. coli S4 and rat S9 ribosomal proteins
CC_OL_001_G24	CC_G_01520	CC1G_00718
CC_OL_001_H01	CC_G_01521	CC1G_00725									1
CC_OL_001_H02	CC_G_01526	CC1G_00732										1		1	YNR020C	ATP23	Putative metalloprotease of the mitochondrial inner membrane, required for processing of Atp6p; has an additional role in assembly of the F0 sector of the F1F0 ATP synthase complex			8
CC_OL_001_H03	CC_G_03513	CC1G_08821													YPL220W	RPL1A	N-terminally acetylated protein component of the large (60S) ribosomal subunit, nearly identical to Rpl1Bp and has similarity to E. coli L1 and rat L10a ribosomal proteins; rpl1a rpl1b double null mutation is lethal
CC_OL_001_H04	CC_G_03541	CC1G_08775									1									0
CC_OL_001_H05	CC_G_07136	CC1G_09623																		1
CC_OL_001_H06	CC_G_11664	CC1G_05985
CC_OL_001_H07	CC_G_11680	CC1G_06013																		0
CC_OL_001_H08	CC_G_01823	CC1G_11141
CC_OL_001_H09	CC_G_01850	CC1G_11153													YJL008C	CCT8	Subunit of the cytosolic chaperonin Cct ring complex, related to Tcp1p, required for the assembly of actin and tubulins in vivo			3
CC_OL_001_H10	CC_G_05890	CC1G_04682	1																	3
CC_OL_001_H11	CC_G_05903	CC1G_04657								1
CC_OL_001_H12	CC_G_05935	CC1G_04601													YPL210C	SRP72	Core component of the signal recognition particle (SRP) ribonucleoprotein (RNP) complex that functions in targeting nascent secretory proteins to the endoplasmic reticulum (ER) membrane
CC_OL_001_H13	CC_A_09414	CC1G_04566													YER126C	NSA2	Protein constituent of 66S pre-ribosomal particles, contributes to processing of the 27S pre-rRNA			2
CC_OL_001_H14	CC_G_11232	CC1G_04501													YCR009C	RVS161	Amphiphysin-like lipid raft protein; subunit of a complex (Rvs161p-Rvs167p) that regulates polarization of the actin cytoskeleton, endocytosis, cell polarity, cell fusion and viability following starvation or osmotic stress
CC_OL_001_H15	CC_G_11272	CC1G_04473																		0
CC_OL_001_H16	CC_G_11278	CC1G_04483													YNL027W	CRZ1	Transcription factor that activates transcription of genes involved in stress response; nuclear localization is positively regulated by calcineurin-mediated dephosphorylation			0
CC_OL_001_H17	CC_G_11282	CC1G_04494																		0
CC_OL_001_H18	CC_G_11294	CC1G_04512
CC_OL_001_H19	CC_G_11296	CC1G_04523													YOR165W	SEY1	Protein of unknown function, contains two predicted GTP-binding motifs GXXXXGKS and DXXG near the N-terminus, homolog of the Arabidopsis gene RHD3 (Root Hair Defective)			0
CC_OL_001_H20	CC_G_11297	CC1G_04524													YNL279W	PRM1	Pheromone-regulated multispanning membrane protein involved in membrane fusion during mating; predicted to have 5 transmembrane segments and a coiled coil domain; localizes to the shmoo tip; regulated by Ste12p			0
CC_OL_001_H21	CC_G_07309	CC1G_09336																		0
CC_OL_001_H22	CC_A_06184	CC1G_09323								1		1			YPR002W	PDH1	Mitochondrial protein that participates in respiration, induced by diauxic shift; homologous to E. coli PrpD, may take part in the conversion of 2-methylcitrate to 2-methylisocitrate			0
CC_OL_001_H23	CC_A_06191	CC1G_09303													YGL123W	RPS2	Protein component of the small (40S) subunit, essential for control of translational accuracy; phosphorylation by C-terminal domain kinase I (CTDK-I) enhances translational accuracy; similar to E. coli S5 and rat S2 ribosomal proteins			2
CC_OL_001_H24	CC_G_07335	CC1G_09318
CC_OL_001_I01	CC_G_07341	CC1G_09329
CC_OL_001_I02	CC_G_07348	CC1G_09339
CC_OL_001_I03	CC_G_07350	CC1G_09342													YER102W	RPS8B	Protein component of the small (40S) ribosomal subunit; identical to Rps8Ap and has similarity to rat S8 ribosomal protein			5
CC_OL_001_I04	CC_G_07355	CC1G_09349																		0
CC_OL_001_I05	CC_G_09685	CC1G_12089									1
CC_OL_001_I06	CC_G_09869	CC1G_11818
CC_OL_001_I07	CC_A_08318	CC1G_11833																		0
CC_OL_001_I08	CC_G_06780	CC1G_02051																		3
CC_OL_001_I09	CC_G_06785	CC1G_02043									1									0
CC_OL_001_I10	CC_G_06802	CC1G_01999								1					YPR004C		Protein with similarity to mammalian electron transfer flavoprotein complex subunit ETF-alpha; interacts with yeast frataxin Yfh1p; null mutant displays increased frequency of mitochondrial genome loss (petite formation)			0
CC_OL_001_I11	CC_G_06814	CC1G_01940													YDL004W	ATP16	Delta subunit of the central stalk of mitochondrial F1F0 ATP synthase, which is a large, evolutionarily conserved enzyme complex required for ATP synthesis; phosphorylated			0
CC_OL_001_I12	CC_G_06821	CC1G_01923																		0
CC_OL_001_I13	CC_G_06827	CC1G_01907													YJR123W	RPS5	Protein component of the small (40S) ribosomal subunit, the least basic of the non-acidic ribosomal proteins; phosphorylated in vivo; essential for viability; has similarity to E. coli S7 and rat S5 ribosomal proteins			4
CC_OL_001_I14	CC_G_06844	CC1G_01885													YLR253W		Putative protein of unknown function; the authentic, non-tagged protein is detected in highly purified mitochondria in high-throughput studies; transcription is periodic during the metabolic cycle; YLR253W is not an essential gene			0
CC_OL_001_I15	CC_G_06855	CC1G_01905
CC_OL_001_I16	CC_G_06876	CC1G_01945																		0
CC_OL_001_I17	CC_G_06878	CC1G_01948													YDR530C	APA2	Diadenosine 5',5''-P1,P4-tetraphosphate phosphorylase II (AP4A phosphorylase), involved in catabolism of bis(5'-nucleosidyl) tetraphosphates; has similarity to Apa1p			0
CC_OL_001_I18	CC_G_06883	CC1G_01961													YJL187C	SWE1	Protein kinase that regulates the G2/M transition by inhibition of Cdc28p kinase activity; localizes to the nucleus and to the daughter side of the mother-bud neck; homolog of S. pombe Wee1p; potential Cdc28p substrate			8
CC_OL_001_I19	CC_G_06905	CC1G_02009													YAL026C	DRS2	Aminophospholipid translocase (flippase) that maintains membrane lipid asymmetry in post-Golgi secretory vesicles; contributes to clathrin-coated vesicle formation and endocytosis; mutations in human homolog ATP8B1 result in liver disease
CC_OL_001_I20	CC_G_06909	CC1G_02015									1									0
CC_OL_001_I21	CC_G_06916	CC1G_02036													YJR051W	OSM1	Fumarate reductase, catalyzes the reduction of fumarate to succinate, required for the reoxidation of intracellular NADH under anaerobic conditions; mutations cause osmotic sensitivity			7
CC_OL_001_I22	CC_A_07768	CC1G_07413													YBR267W	REI1	Cytoplasmic pre-60S factor; required for the correct recycling of shuttling factors Alb1, Arx1 and Tif6 at the end of the ribosomal large subunit biogenesis; involved in bud growth in the mitotic signaling network			0
CC_OL_001_I23	CC_G_09297	CC1G_07356													YMR116C	ASC1	G-protein beta subunit and guanine nucleotide dissociation inhibitor for Gpa2p; ortholog of RACK1 that inhibits translation; core component of the small (40S) ribosomal subunit; represses Gcn4p in the absence of amino acid starvation
CC_OL_001_I24	CC_G_09314	CC1G_07394									1									3
CC_OL_001_J01	CC_G_09322	CC1G_07408													YDR052C	DBF4	Regulatory subunit of Cdc7p-Dbf4p kinase complex, required for Cdc7p kinase activity and initiation of DNA replication; phosphorylates the Mcm2-7 family of proteins; cell cycle regulated
CC_OL_001_J02	CC_G_09325	CC1G_07412													YLR084C	RAX2	N-glycosylated protein involved in the maintenance of bud site selection during bipolar budding; localization requires Rax1p
CC_OL_001_J03	CC_G_10886	CC1G_11539													YMR309C	NIP1	Subunit of the eukaryotic translation initiation factor 3 (eIF3), involved in the assembly of preinitiation complex and start codon selection			0
CC_OL_001_J04	CC_G_10887	CC1G_11539													YMR309C	NIP1	Subunit of the eukaryotic translation initiation factor 3 (eIF3), involved in the assembly of preinitiation complex and start codon selection
CC_OL_001_J05	CC_G_10903	CC1G_11546													YOR028C	CIN5	Basic leucine zipper (bZIP) transcriptional factor of the yAP-1 family that mediates pleiotropic drug resistance and salt tolerance; localizes constitutively to the nucleus			0
CC_OL_001_J06	CC_G_02731	CC1G_06891																		8
CC_OL_001_J07	CC_G_02732										1
CC_OL_001_J08	CC_G_02736	CC1G_06880																		9
CC_OL_001_J09	CC_G_02757	CC1G_06822											1		YOR120W	GCY1	Putative NADP(+) coupled glycerol dehydrogenase, proposed to be involved in an alternative pathway for glycerol catabolism; member of the aldo-keto reductase (AKR) family			8
CC_OL_001_J10	CC_G_02765	CC1G_06820													YEL037C	RAD23	Protein with ubiquitin-like N terminus, recognizes and binds damaged DNA (with Rad4p) during nucleotide excision repair; regulates Rad4p levels, subunit of Nuclear Excision Repair Factor 2 (NEF2); homolog of human HR23A and HR23B proteins			5
CC_OL_001_J11	CC_A_02399	CC1G_06838
CC_OL_001_J12	CC_A_02400	CC1G_06842													YIR027C	DAL1	Allantoinase, converts allantoin to allantoate in the first step of allantoin degradation; expression sensitive to nitrogen catabolite repression
CC_OL_001_J13	CC_G_01010	CC1G_03333
CC_OL_001_J14	CC_G_01030	CC1G_03304									1				YMR196W		Putative protein of unknown function; green fluorescent protein (GFP)-fusion protein localizes to the cytoplasm; YMR196W is not an essential gene
CC_OL_001_J15	CC_G_01033	CC1G_03299																		0
CC_OL_001_J16	CC_G_01049	CC1G_03263													YNL305C		Putative protein of unknown function; green fluorescent protein (GFP)-fusion protein localizes to the vacuole; YNL305C is not an essential gene			8
CC_OL_001_J17	CC_G_01072	CC1G_03217													YJR040W	GEF1	Chloride channel localized to late- or post-Golgi vesicles, involved in iron metabolism; highly homologous to voltage-gated chloride channels in vertebrates
CC_OL_001_J18	CC_G_01078	CC1G_03206
CC_OL_001_J19	CC_G_01101	CC1G_03218													YJR076C	CDC11	Component of the septin ring of the mother-bud neck that is required for cytokinesis; septins recruit proteins to the neck and can act as a barrier to diffusion at the membrane, and they comprise the 10nm filaments seen with EM
CC_OL_001_J20	CC_G_01109	CC1G_03237
CC_OL_001_J21	CC_G_01123	CC1G_03269									1				YLR048W	RPS0B	Protein component of the small (40S) ribosomal subunit, nearly identical to Rps0Ap; required for maturation of 18S rRNA along with Rps0Ap; deletion of either RPS0 gene reduces growth rate, deletion of both genes is lethal			4
CC_OL_001_J22	CC_G_01138										1		1
CC_OL_001_J23	CC_G_02946	CC1G_02391											1
CC_OL_001_J24	CC_G_02973	CC1G_02329																		0
CC_OL_001_K01	CC_G_02994	CC1G_02286									1									0
CC_OL_001_K02	CC_G_03022	CC1G_02277																		0
CC_OL_001_K03	CC_G_03031	CC1G_02298													YNR007C	ATG3	E2-like enzyme involved in autophagy and the cytoplasm-to-vacuole targeting (Cvt) pathway; plays a role in formation of Atg8p-phosphatidylethanolamine conjugates, which are involved in membrane dynamics during autophagy and Cvt
CC_OL_001_K04	CC_G_03038	CC1G_02312													YDR037W	KRS1	Lysyl-tRNA synthetase
CC_OL_001_K05	CC_G_03039	CC1G_02313																		0
CC_OL_001_K06	CC_G_03072	CC1G_02394
CC_OL_001_K07	CC_A_07642	CC1G_03972																		0
CC_OL_001_K08	CC_G_09154	CC1G_04022																		0
CC_OL_001_K09	CC_G_09164	CC1G_04039		1																7
CC_OL_001_K10	CC_G_10509	CC1G_09897								1					YPL078C	ATP4	Subunit b of the stator stalk of mitochondrial F1F0 ATP synthase, which is a large, evolutionarily conserved enzyme complex required for ATP synthesis; phosphorylated			0
CC_OL_001_K11	CC_G_10510	CC1G_09895								1										0
CC_OL_001_K12	CC_G_10532	CC1G_09879													YDL126C	CDC48	ATPase in ER, nuclear membrane and cytosol with homology to mammalian p97; in a complex with Npl4p and Ufd1p participates in retrotranslocation of ubiquitinated proteins from the ER into the cytosol for degradation by the proteasome			0
CC_OL_001_K13	CC_G_12012	CC1G_00963													YER053C	PIC2	Mitochondrial phosphate carrier, imports inorganic phosphate into mitochondria; functionally redundant with Mir1p but less abundant than Mir1p under normal conditions; expression is induced at high temperature
CC_OL_001_K14	CC_G_12033	CC1G_00925										1			YIL140W	AXL2	Integral plasma membrane protein required for axial budding in haploid cells, localizes to the incipient bud site and bud neck; glycosylated by Pmt4p; potential Cdc28p substrate
CC_OL_001_K15	CC_G_12043	CC1G_00882													YGL190C	CDC55	Non-essential regulatory subunit B of protein phosphatase 2A, which has multiple roles in mitosis and protein biosynthesis; involved in regulation of mitotic exit; found in the nucleus of most cells, also at the bud neck and at the bud tip			0
CC_OL_001_K16	CC_G_12056	CC1G_00856
CC_OL_001_K17	CC_G_12063	CC1G_00848				1							1		YOL071W	EMI5	Non-essential protein of unknown function required for transcriptional induction of the early meiotic-specific transcription factor IME1, also required for sporulation; null mutant excretes excess acetic acid
CC_OL_001_K18	CC_G_12119	CC1G_00749													YDL029W	ARP2	Essential component of the Arp2/3 complex, which is a highly conserved actin nucleation center required for the motility and integrity of actin patches; involved in endocytosis and membrane growth and polarity
CC_OL_001_K19	CC_G_12124	CC1G_00758													YGR085C	RPL11B	Protein component of the large (60S) ribosomal subunit, nearly identical to Rpl11Ap; involved in ribosomal assembly; depletion causes degradation of proteins and RNA of the 60S subunit; has similarity to E. coli L5 and rat L11			0
CC_OL_001_K20	CC_G_12153	CC1G_00821													YIL145C	PAN6	Pantothenate synthase, also known as pantoate-beta-alanine ligase, required for pantothenic acid biosynthesis, deletion causes pantothenic acid auxotrophy, homologous to E. coli panC			9
CC_OL_001_K21	CC_G_12165	CC1G_00843																		0
CC_OL_001_K22	CC_G_12170	CC1G_00858									1				YFL053W	DAK2	Dihydroxyacetone kinase, required for detoxification of dihydroxyacetone (DHA); involved in stress adaptation
CC_OL_001_K23	CC_G_12173	CC1G_00862								1
CC_OL_001_K24	CC_G_12187	CC1G_00890
CC_OL_001_L01	CC_G_12202	CC1G_00913												1	YMR288W	HSH155	U2-snRNP associated splicing factor that forms extensive associations with the branch site-3' splice site-3' exon region upon prespliceosome formation; similarity to the mammalian U2 snRNP-associated splicing factor SAP155
CC_OL_001_L02	CC_G_12234	CC1G_00971													YHL010C		Putative protein of unknown function, contains a zinc finger region and has homology to human BRAP2, which is a cytoplasmic protein that binds nuclear localization sequences			0
CC_OL_001_L03	CC_G_09891	CC1G_09031													YIL065C	FIS1	Mitochondrial outer membrane protein involved in membrane fission, required for localization of Dnm1p and Mdv1p during mitochondrial division; mediates ethanol-induced apoptosis and ethanol-induced mitochondrial fragmentation
CC_OL_001_L04	CC_G_09908	CC1G_08990
CC_OL_001_L05	CC_G_09910	CC1G_08989													YGL255W	ZRT1	High-affinity zinc transporter of the plasma membrane, responsible for the majority of zinc uptake; transcription is induced under low-zinc conditions by the Zap1p transcription factor			0
CC_OL_001_L06	CC_A_08356	CC1G_09000													YBL099W	ATP1	Alpha subunit of the F1 sector of mitochondrial F1F0 ATP synthase, which is a large, evolutionarily conserved enzyme complex required for ATP synthesis; phosphorylated			0
CC_OL_001_L07	CC_G_00409	CC1G_13289													YBR026C	ETR1	2-enoyl thioester reductase, member of the medium chain dehydrogenase/reductase family; localized to in mitochondria, where it has a probable role in fatty acid synthesis
CC_OL_001_L08	CC_G_07245	CC1G_11571													YHR039C	MSC7	Protein of unknown function, green fluorescent protein (GFP)-fusion protein localizes to the endoplasmic reticulum; msc7 mutants are defective in directing meiotic recombination events to homologous chromatids
CC_OL_001_L09	CC_G_04787									1
CC_OL_001_L10	CC_G_04820	CC1G_05697
CC_OL_001_L11	CC_G_04826	CC1G_05686																		0
CC_OL_001_L12	CC_G_04827	CC1G_05685																		0
CC_OL_001_L13	CC_G_04846	CC1G_05664													YBR218C	PYC2	Pyruvate carboxylase isoform, cytoplasmic enzyme that converts pyruvate to oxaloacetate; highly similar to isoform Pyc1p but differentially regulated; mutations in the human homolog are associated with lactic acidosis
CC_OL_001_L14	CC_G_04855	CC1G_05692									1				YDL102W	POL3	Catalytic subunit of DNA polymerase delta; required for chromosomal DNA replication during mitosis and meiosis, intragenic recombination, repair of double strand DNA breaks, and DNA replication during nucleotide excision repair (NER)
CC_OL_001_L15	CC_G_04865	CC1G_05709																		0
CC_OL_001_L16	CC_G_04872	CC1G_05719													YFL030W	AGX1	Alanine:glyoxylate aminotransferase (AGT), catalyzes the synthesis of glycine from glyoxylate, which is one of three pathways for glycine biosynthesis in yeast; has similarity to mammalian and plant alanine:glyoxylate aminotransferases			0
CC_OL_001_L17	CC_G_04874	CC1G_05724																		0
CC_OL_001_L18	CC_G_04886	CC1G_05750													YGR101W	PCP1	Mitochondrial serine protease required for the processing of various mitochondrial proteins and maintenance of mitochondrial DNA and morphology; belongs to the rhomboid-GlpG superfamily of intramembrane peptidases			0
CC_OL_001_L19	CC_G_10912	CC1G_12227													YMR307W	GAS1	Beta-1,3-glucanosyltransferase, required for cell wall assembly; localizes to the cell surface via a glycosylphosphatidylinositol (GPI) anchor
CC_OL_001_L20	CC_G_10917	CC1G_12218
CC_OL_001_L21	CC_G_08093	CC1G_08323																		3
CC_OL_001_L22	CC_G_08099	CC1G_08316																		0
CC_OL_001_L23	CC_G_08104	CC1G_08328													YDR044W	HEM13	Coproporphyrinogen III oxidase, an oxygen requiring enzyme that catalyzes the sixth step in the heme biosynthetic pathway; localizes to the mitochondrial inner membrane; transcription is repressed by oxygen and heme (via Rox1p and Hap1p)
CC_OL_001_L24	CC_G_08122	CC1G_08360
CC_OL_001_M01	CC_A_06843	CC1G_08364								1										0	erg11
CC_OL_001_M02	CC_G_08126	CC1G_08368													YDR425W	SNX41	Sorting nexin, involved in the retrieval of late-Golgi SNAREs from the post-Golgi endosome to the trans-Golgi network; interacts with Snx4p			0
CC_OL_001_M03	CC_G_07055	CC1G_05954										1		1
CC_OL_001_M04	CC_G_07109	CC1G_05918								1										0
CC_OL_001_M05	CC_G_07112	CC1G_05925																		0
CC_OL_001_M06	CC_A_00135	CC1G_12895								1					YIL160C	POT1	3-ketoacyl-CoA thiolase with broad chain length specificity, cleaves 3-ketoacyl-CoA into acyl-CoA and acetyl-CoA during beta-oxidation of fatty acids			8
CC_OL_001_M07	CC_G_09223	CC1G_06981								1					YOR304W	ISW2	Member of the imitation-switch (ISWI) class of ATP-dependent chromatin remodeling complexes; ATPase component that, with Itc1p, forms a complex required for repression of a-specific genes, INO1, and early meiotic genes during mitotic growth			0
CC_OL_001_M08	CC_A_08934	CC1G_07487													YDR074W	TPS2	Phosphatase subunit of the trehalose-6-phosphate synthase/phosphatase complex, which synthesizes the storage carbohydrate trehalose; expression is induced by stress conditions and repressed by the Ras-cAMP pathway			6
CC_OL_001_M09	CC_G_04957	CC1G_10718													YPL090C	RPS6A	Protein component of the small (40S) ribosomal subunit; identical to Rps6Bp and has similarity to rat S6 ribosomal protein
CC_OL_001_M10	CC_G_04970	CC1G_10710													YFL008W	SMC1	Subunit of the multiprotein cohesin complex, essential protein involved in chromosome segregation and in double-strand DNA break repair; SMC chromosomal ATPase family member, binds DNA with a preference for DNA with secondary structure
CC_OL_001_M11	CC_G_08302	CC1G_02545
CC_OL_001_M12	CC_G_08320	CC1G_02501
CC_OL_001_M13	CC_G_08322	CC1G_02496													YGL103W	RPL28	Ribosomal protein of the large (60S) ribosomal subunit, has similarity to E. coli L15 and rat L27a ribosomal proteins; may have peptidyl transferase activity; can mutate to cycloheximide resistance
CC_OL_001_M14	CC_G_08326	CC1G_02490													YDR402C	DIT2	N-formyltyrosine oxidase, sporulation-specific microsomal enzyme involved in the production of N,N-bisformyl dityrosine required for spore wall maturation, homologous to cytochrome P-450s
CC_OL_001_M15	CC_G_08343	CC1G_02453													YLR345W		Similar to 6-phosphofructo-2-kinase/fructose-2,6-bisphosphatase enzymes responsible for the metabolism of fructoso-2,6-bisphosphate; mRNA expression is repressed by the Rfx1p-Tup1p-Ssn6p repressor complex; YLR345W is not an essential gene
CC_OL_001_M16	CC_G_08427	CC1G_02524								1		1			YKL104C	GFA1	Glutamine-fructose-6-phosphate amidotransferase, catalyzes the formation of glucosamine-6-P and glutamate from fructose-6-P and glutamine in the first step of chitin biosynthesis
CC_OL_001_M17	CC_A_07096	CC1G_02544																		0
CC_OL_001_M18	CC_G_08444	CC1G_02555													YDR452W	PPN1	Vacuolar endopolyphosphatase with a role in phosphate metabolism; functions as a homodimer			8
CC_OL_001_M19	CC_G_09755	CC1G_07689													YDR148C	KGD2	Dihydrolipoyl transsuccinylase, component of the mitochondrial alpha-ketoglutarate dehydrogenase complex, which catalyzes the oxidative decarboxylation of alpha-ketoglutarate to succinyl-CoA in the TCA cycle; phosphorylated
CC_OL_001_M20	CC_G_09756	CC1G_07691																		0
CC_OL_001_M21	CC_G_09776	CC1G_07727													YDR381W	YRA1	Nuclear protein that binds to RNA and to Mex67p, required for export of poly(A)+ mRNA from the nucleus; member of the REF (RNA and export factor binding proteins) family; another family member, Yra2p, can substitute for Yra1p function
CC_OL_001_M22	CC_G_09778	CC1G_07728													YML008C	ERG6	Delta(24)-sterol C-methyltransferase, converts zymosterol to fecosterol in the ergosterol biosynthetic pathway by methylating position C-24; localized to both lipid particles and mitochondrial outer membrane			7
CC_OL_001_M23	CC_G_09780	CC1G_07730
CC_OL_001_M24	CC_G_09405	CC1G_07669									1				YER021W	RPN3	Essential, non-ATPase regulatory subunit of the 26S proteasome lid, similar to the p58 subunit of the human 26S proteasome; temperature-sensitive alleles cause metaphase arrest, suggesting a role for the proteasome in cell cycle control			4
CC_OL_001_N01	CC_G_09418									1
CC_OL_001_N02	CC_G_09434	CC1G_07622																		0
CC_OL_001_N03	CC_G_09441	CC1G_07643													YER133W	GLC7	Catalytic subunit of type 1 serine/threonine protein phosphatase, involved in many processes including glycogen metabolism, sporulation, and mitosis; interacts with multiple regulatory subunits; predominantly isolated with Sds22p			7
CC_OL_001_N04	CC_G_09450	CC1G_07664																		0
CC_OL_001_N05	CC_G_06607	CC1G_11074																		0
CC_OL_001_N06	CC_G_06620	CC1G_11057													YOL100W	PKH2	Serine/threonine protein kinase involved in sphingolipid-mediated signaling pathway that controls endocytosis; activates Ypk1p and Ykr2p, components of signaling cascade required for maintenance of cell wall integrity; redundant with Pkh1p			0
CC_OL_001_N07	CC_G_06624	CC1G_11064													YPL037C	EGD1	Subunit beta1 of the nascent polypeptide-associated complex (NAC) involved in protein targeting, associated with cytoplasmic ribosomes; enhances DNA binding of the Gal4p activator; homolog of human BTF3b
CC_OL_001_N08	CC_G_03615	CC1G_03588
CC_OL_001_N09	CC_G_03618	CC1G_03582									1				YMR092C	AIP1	Actin cortical patch component, interacts with the actin depolymerizing factor cofilin; required to restrict cofilin localization to cortical patches; contains WD repeats			0
CC_OL_001_N10	CC_G_03623	CC1G_03570
CC_OL_001_N11	CC_G_03656	CC1G_03502									1
CC_OL_001_N12	CC_G_03689	CC1G_03512									1				YMR002W	MIC17	Mitochondrial intermembrane space cysteine motif protein; MIC17 is not an essential gene
CC_OL_001_N13	CC_G_03708	CC1G_03552								1										7
CC_OL_001_N14	CC_G_03710	CC1G_03559
CC_OL_001_N15	CC_A_00662	CC1G_08610													YLR075W	RPL10	Protein component of the large (60S) ribosomal subunit, responsible for joining the 40S and 60S subunits; regulates translation initiation; has similarity to rat L10 ribosomal protein and to members of the QM gene family
CC_OL_001_N16	CC_G_00773	CC1G_08557																		8
CC_OL_001_N17	CC_G_00774	CC1G_08560													YHR170W	NMD3	Protein involved in nuclear export of the large ribosomal subunit; acts as a Crm1p-dependent adapter protein for export of nascent ribosomal subunits through the nuclear pore complex			3
CC_OL_001_N18	CC_G_00776	CC1G_08563																		0
CC_OL_001_N19	CC_G_08869	CC1G_08517													YDR331W	GPI8	ER membrane glycoprotein subunit of the glycosylphosphatidylinositol transamidase complex that adds glycosylphosphatidylinositol (GPI) anchors to newly synthesized proteins; human PIG-K protein is a functional homolog			0
CC_OL_001_N20	CC_G_08893	CC1G_08523																		0
CC_OL_001_N21	CC_G_02656	CC1G_10563
CC_OL_001_N22	CC_G_00175	CC1G_01242																		0
CC_OL_001_N23	CC_G_00177	CC1G_01242
CC_OL_001_N24	CC_G_00178	CC1G_01239													YLR195C	NMT1	N-myristoyl transferase, catalyzes the cotranslational, covalent attachment of myristic acid to the N-terminal glycine residue of several proteins involved in cellular growth and signal transduction			1
CC_OL_001_O01	CC_G_00179	CC1G_01237																		0
CC_OL_001_O02	CC_G_00180
CC_OL_001_O03	CC_G_00181									1										3	ubc9
CC_OL_001_O04	CC_G_00183	CC1G_01233
CC_OL_001_O05	CC_G_00184
CC_OL_001_O06	CC_G_00185	CC1G_01231									1				YLR409C	UTP21	Subunit of U3-containing 90S preribosome and Small Subunit (SSU) processome complexes involved in production of 18S rRNA and assembly of small ribosomal subunit; synthetic defect with STI1 Hsp90 cochaperone; human homolog linked to glaucoma
CC_OL_001_O07	CC_G_00186	CC1G_01228																		0
CC_OL_001_O08	CC_G_00187	CC1G_01226																		4
CC_OL_001_O09	CC_G_00188	CC1G_01225													YOR145C	PNO1	Essential nucleolar protein required for pre-18S rRNA processing, interacts with Dim1p, an 18S rRNA dimethyltransferase, and also with Nob1p, which is involved in proteasome biogenesis; contains a KH domain			3
CC_OL_001_O10	CC_G_00189	CC1G_01223													YDR305C	HNT2	Dinucleoside triphosphate hydrolase; has similarity to the tumor suppressor FHIT and belongs to the histidine triad (HIT) superfamily of nucleotide-binding proteins			0
CC_OL_001_O11	CC_G_00190	CC1G_01218																		3
CC_OL_001_O12	CC_G_00191	CC1G_01214
CC_OL_001_O13	CC_G_00192	CC1G_01213																		3
CC_OL_001_O14	CC_G_00193	CC1G_01206													YFR018C		Putative protein of unknown function			0
CC_OL_001_O15	CC_G_00194	CC1G_01203																		2
CC_OL_001_O16	CC_G_00195	CC1G_01200													YMR028W	TAP42	Essential protein involved in the TOR signaling pathway; physically associates with the protein phosphatase 2A and the SIT4 protein phosphatase catalytic subunits			0
CC_OL_001_O17	CC_G_00196	CC1G_01198													YPL023C	MET12	Protein with methylenetetrahydrofolate reductase (MTHFR) activity in vitro; null mutant has no phenotype and is prototrophic for methionine; MET13 encodes major isozyme of MTHFR			0
CC_OL_001_O18	CC_G_00197	CC1G_01195																		9
CC_OL_001_O19	CC_G_00199	CC1G_01191													YPR066W	UBA3	Protein that acts together with Ula1p to activate Rub1p before its conjugation to proteins (neddylation), which may play a role in protein degradation; GFP-fusion protein localizes to the cytoplasm in a punctate pattern			3
CC_OL_001_O20	CC_G_00200	CC1G_01189																		2
CC_OL_001_O21	CC_G_00201	CC1G_01188													YMR227C	TAF7	TFIID subunit (67 kDa), involved in RNA polymerase II transcription initiation			0
CC_OL_001_O22	CC_A_00163	CC1G_01186													YDL087C	LUC7	Essential protein associated with the U1 snRNP complex; splicing factor involved in recognition of 5' splice site; contains two zinc finger motifs; N-terminal zinc finger binds pre-mRNA			0
CC_OL_001_O23	CC_G_00203	CC1G_01185																		8
CC_OL_001_O24	CC_G_00204	CC1G_01181													YDR375C	BCS1	Protein of the mitochondrial inner membrane that functions as an ATP-dependent chaperone, required for the incorporation of the Rip1p and Qcr10p subunits into the cytochrome bc(1) complex; member of the CDC48/PAS1/SEC18 ATPase family			3
CC_OL_001_P01	CC_G_00205	CC1G_01177																		4
CC_OL_001_P02	CC_A_00167	CC1G_01176													YEL051W	VMA8	Subunit D of the eight-subunit V1 peripheral membrane domain of the vacuolar H+-ATPase (V-ATPase), an electrogenic proton pump found throughout the endomembrane system; plays a role in the coupling of proton transport and ATP hydrolysis			0
CC_OL_001_P03	CC_G_00207	CC1G_01174																		0
CC_OL_001_P04	CC_G_00208	CC1G_01172																		0
CC_OL_001_P05	CC_G_00209	CC1G_01171													YBR105C	VID24	Peripheral membrane protein located at Vid (vacuole import and degradation) vesicles; regulates fructose-1,6-bisphosphatase (FBPase) targeting to the vacuole; promotes proteasome-dependent catabolite degradation of FBPase			0
CC_OL_001_P06	CC_G_00210	CC1G_01170																		0
CC_OL_001_P07	CC_A_00172	CC1G_01166																		0
CC_OL_001_P08	CC_G_00212	CC1G_01165																		0
CC_OL_001_P09	CC_G_00213	CC1G_01163													YBR213W	MET8	Bifunctional dehydrogenase and ferrochelatase, involved in the biosynthesis of siroheme, a prosthetic group used by sulfite reductase; required for sulfate assimilation and methionine biosynthesis			0
CC_OL_001_P10	CC_G_00214	CC1G_01162													YPR114W		Putative protein of unknown function			7
CC_OL_001_P11	CC_G_00215	CC1G_01160													YDR027C	VPS54	Component of the GARP (Golgi-associated retrograde protein) complex, Vps51p-Vps52p-Vps53p-Vps54p, which is required for the recycling of proteins from endosomes to the late Golgi; potentially phosphorylated by Cdc28p			0
CC_OL_001_P12	CC_G_00216	CC1G_01158																		8
CC_OL_001_P13	CC_A_00178	CC1G_01157																		0
CC_OL_001_P14	CC_G_00217	CC1G_01155																		0
CC_OL_001_P15	CC_G_00218	CC1G_01153													YLR289W	GUF1	Mitochondrial matrix GTPase that associates with mitochondrial ribosomes; important for translation under temperature and nutrient stress; may have a role in translational fidelity; similar to bacterial LepA elongation factor
CC_OL_001_P16	CC_G_00219	CC1G_01149
CC_OL_001_P17	CC_G_00220	CC1G_01143													YGL142C	GPI10	Integral membrane protein involved in glycosylphosphatidylinositol (GPI) anchor synthesis; putative alpha 1,2 mannosyltransferase required for addition of the third mannose onto the GPI core structure; human PIG-Bp is a functional homolog
CC_OL_001_P18	CC_G_00221	CC1G_01141													YDR374C		Putative protein of unknown function
CC_OL_001_P19	CC_G_00222	CC1G_01140																		0
CC_OL_001_P20	CC_G_00223	CC1G_01137													YOL143C	RIB4	Lumazine synthase (6,7-dimethyl-8-ribityllumazine synthase, also known as DMRL synthase); catalyzes synthesis of immediate precursor to riboflavin			0
CC_OL_001_P21	CC_G_00224	CC1G_01136													YML121W	GTR1	Cytoplasmic GTP binding protein and negative regulator of the Ran/Tc4 GTPase cycle; component of GSE complex, which is required for sorting of Gap1p; involved in phosphate transport and telomeric silencing; similar to human RagA and RagB			3
CC_OL_001_P22	CC_G_00225	CC1G_01133																		4
CC_OL_001_P23	CC_G_00227	CC1G_01130																		3
CC_OL_001_P24	CC_A_00190	CC1G_01128																		0
CC_OL_002_A01	CC_G_00229	CC1G_01122									1				YGL076C	RPL7A	Protein component of the large (60S) ribosomal subunit, nearly identical to Rpl7Bp and has similarity to E. coli L30 and rat L7 ribosomal proteins; contains a conserved C-terminal Nucleic acid Binding Domain (NDB2)			0
CC_OL_002_A02	blank
CC_OL_002_A03	CC_G_00230	CC1G_01121													YNL036W	NCE103	Carbonic anhydrase; poorly transcribed under aerobic conditions and at an undetectable level under anaerobic conditions; involved in non-classical protein export pathway			0
CC_OL_002_A04	CC_G_00231	CC1G_01120																		3
CC_OL_002_A05	CC_G_00232	CC1G_01118													YJL054W	TIM54	Component of the mitochondrial Tim54p-Tim22p complex involved in insertion of polytopic proteins into the inner membrane			0
CC_OL_002_A06	CC_G_00234	CC1G_01118													YJL054W	TIM54	Component of the mitochondrial Tim54p-Tim22p complex involved in insertion of polytopic proteins into the inner membrane
CC_OL_002_A07	CC_G_00235	CC1G_01116													YBR135W	CKS1	Cyclin-dependent protein kinase regulatory subunit and adaptor; modulates proteolysis of M-phase targets through interactions with the proteasome; role in transcriptional regulation, recruiting proteasomal subunits to target gene promoters
CC_OL_002_A08	CC_G_00236	CC1G_01110													YER007W	PAC2	Microtubule effector required for tubulin heterodimer formation, binds alpha-tubulin, required for normal microtubule function, null mutant exhibits cold-sensitive microtubules and sensitivity to benomyl			0
CC_OL_002_A09	CC_G_00238	CC1G_01103																		5
CC_OL_002_A10	CC_G_00239	CC1G_01100													YGR093W		Putative debranching enzyme associated ribonuclease; green fluorescent protein (GFP)-fusion protein localizes to the nucleus
CC_OL_002_A11	CC_G_00241	CC1G_01097									1									0
CC_OL_002_A12	CC_G_00242	CC1G_01095																		3
CC_OL_002_A13	CC_G_00243	CC1G_01094													YBR234C	ARC40	Subunit of the ARP2/3 complex, which is required for the motility and integrity of cortical actin patches			0
CC_OL_002_A14	CC_G_00244	CC1G_01092																		0
CC_OL_002_A15	CC_G_00245	CC1G_01090
CC_OL_002_A16	CC_G_00246	CC1G_01088																		0
CC_OL_002_A17	CC_G_00247	CC1G_01087																		0
CC_OL_002_A18	CC_G_00249	CC1G_01085																		0
CC_OL_002_A19	CC_G_00250	CC1G_01082													YJR121W	ATP2	Beta subunit of the F1 sector of mitochondrial F1F0 ATP synthase, which is a large, evolutionarily conserved enzyme complex required for ATP synthesis; phosphorylated
CC_OL_002_A20	CC_G_00251	CC1G_01081								1		1		1						0
CC_OL_002_A21	CC_A_00211	CC1G_01077	1												YNL104C	LEU4	Alpha-isopropylmalate synthase (2-isopropylmalate synthase); the main isozyme responsible for the first step in the leucine biosynthesis pathway			0
CC_OL_002_A22	CC_G_00253	CC1G_01076													YDL149W	ATG9	Transmembrane protein involved in forming Cvt and autophagic vesicles; cycles between the phagophore assembly site (PAS) and other cytosolic punctate structures, not found in autophagosomes; may be involved in membrane delivery to the PAS			0
CC_OL_002_A23	CC_G_00254	CC1G_01075																		0
CC_OL_002_A24	CC_A_00214	CC1G_01074													YOL009C	MDM12	Mitochondrial outer membrane protein, required for transmission of mitochondria to daughter cells; component of the Mdm10-Mdm12-Mmm1 complex involved in import and assembly of outer membrane beta-barrel proteins			0
CC_OL_002_B01	CC_G_00256	CC1G_01071																		0
CC_OL_002_B02	CC_G_00259	CC1G_01066																		3
CC_OL_002_B03	CC_G_00260	CC1G_01062								1										0
CC_OL_002_B04	CC_G_00261	CC1G_01060																		0
CC_OL_002_B05	CC_A_00219	CC1G_01055													YFL009W	CDC4	F-box protein required for G1/S and G2/M transition, associates with Skp1p and Cdc53p to form a complex, SCFCdc4, which acts as ubiquitin-protein ligase directing ubiquitination of the phosphorylated CDK inhibitor Sic1p			0
CC_OL_002_B06	CC_G_00264	CC1G_01053																		3
CC_OL_002_B07	CC_G_00265	CC1G_01053								1
CC_OL_002_B08	CC_G_00266	CC1G_01049																		0
CC_OL_002_B09	CC_G_00267	CC1G_01048
CC_OL_002_B10	CC_G_00268	CC1G_01047																		0
CC_OL_002_B11	CC_G_00269	CC1G_01046								1					YKR090W	PXL1	LIM domain-containing protein that localizes to sites of polarized growth, required for selection and/or maintenance of polarized growth sites, may modulate signaling by the GTPases Cdc42p and Rho1p; has similarity to metazoan paxillin			8
CC_OL_002_B12	CC_G_00270	CC1G_01044																		0
CC_OL_002_B13	CC_G_00271	CC1G_01043																		0
CC_OL_002_B14	CC_G_00272	CC1G_01040									1				YPL218W	SAR1	GTPase, GTP-binding protein of the ARF family, component of COPII coat of vesicles; required for transport vesicle formation during ER to Golgi protein transport
CC_OL_002_B15	CC_G_00273	CC1G_01039													YJR013W	GPI14	Glycosylphosphatidylinositol-alpha 1,4 mannosyltransferase I, involved in GPI anchor biosynthesis, requires Pbn1p for function; homolog of mammalian PIG-M			0
CC_OL_002_B16	CC_G_00274	CC1G_01036																		0
CC_OL_002_B17	CC_G_00275	CC1G_01034													YBR132C	AGP2	High affinity polyamine permease, preferentially uses spermidine over putrescine; expression is down-regulated by osmotic stress; plasma membrane carnitine transporter, also functions as a low-affinity amino acid permease
CC_OL_002_B18	CC_G_00277	CC1G_01029
CC_OL_002_B19	CC_G_00278	CC1G_01027																		0
CC_OL_002_B20	CC_G_00279	CC1G_01025
CC_OL_002_B21	CC_G_00281	CC1G_01021													YPR200C	ARR2	Arsenate reductase required for arsenate resistance; converts arsenate to arsenite which can then be exported from cells by Arr3p			3
CC_OL_002_B22	CC_G_00282	CC1G_01018													YDL238C	GUD1	Guanine deaminase, a catabolic enzyme of the guanine salvage pathway producing xanthine and ammonia from guanine; activity is low in exponentially-growing cultures but expression is increased in post-diauxic and stationary-phase cultures
CC_OL_002_B23	CC_A_00237								1
CC_OL_002_B24	CC_G_00284	CC1G_01015																		2
CC_OL_002_C01	CC_G_00285	CC1G_01014																		0
CC_OL_002_C02	CC_A_00240
CC_OL_002_C03	CC_G_00291	CC1G_01006																		0
CC_OL_002_C04	CC_G_00294	CC1G_01017																		5
CC_OL_002_C05	CC_G_00295	CC1G_01020																		0
CC_OL_002_C06	CC_G_00296	CC1G_01022																		3
CC_OL_002_C07	CC_G_00298	CC1G_01026																		0
CC_OL_002_C08	CC_G_00299	CC1G_01028																		8
CC_OL_002_C09	CC_G_00301	CC1G_01030																		0
CC_OL_002_C10	CC_G_00302	CC1G_01031													YER005W	YND1	Apyrase with wide substrate specificity, involved in preventing the inhibition of glycosylation by hydrolyzing nucleoside tri- and diphosphates which are inhibitors of glycotransferases; partially redundant with Gda1p			0
CC_OL_002_C11	CC_G_00303	CC1G_01033													YPR103W	PRE2	Beta 5 subunit of the 20S proteasome, responsible for the chymotryptic activity of the proteasome			2
CC_OL_002_C12	CC_G_00304	CC1G_01038													YEL026W	SNU13	RNA binding protein, part of U3 snoRNP involved in rRNA processing, part of U4/U6-U5 tri-snRNP involved in mRNA splicing, similar to human 15.5K protein
CC_OL_002_C13	CC_G_00305	CC1G_01041																		0
CC_OL_002_C14	CC_G_00306	CC1G_01042																		0
CC_OL_002_C15	CC_G_00307	CC1G_01045													YDR063W		Putative protein of unknown function; green fluorescent protein (GFP)-fusion protein localizes to the cytoplasm and nucleus; null mutant is viable and displays decreased frequency of mitochondrial genome loss (petite formation)			0
CC_OL_002_C16	CC_G_00308	CC1G_01051									1									0
CC_OL_002_C17	CC_G_00309	CC1G_01052																		0
CC_OL_002_C18	CC_A_00256	CC1G_01054																		0
CC_OL_002_C19	CC_G_00311	CC1G_01056
CC_OL_002_C20	CC_G_00314	CC1G_01059													YGR277C		Putative pantetheine-phosphate adenylyltransferase (PPAT) that catalyzes the fourth step in the biosynthesis of coenzyme A from pantothenate; conserved in bacteria, humans, and plants; essential for viability			0
CC_OL_002_C21	CC_G_00315	CC1G_01061																		0
CC_OL_002_C22	CC_G_00316	CC1G_01064																		0
CC_OL_002_C23	CC_G_00317	CC1G_01065																		0
CC_OL_002_C24	CC_G_00318	CC1G_01067													YMR080C	NAM7	ATP-dependent RNA helicase of the SFI superfamily, required for nonsense mediated mRNA decay and for efficient translation termination at nonsense codons; involved in telomere maintenance; potentially has E3 ubiquitin ligase activity			4
CC_OL_002_D01	CC_G_00321	CC1G_01073													YPL086C	ELP3	Subunit of Elongator complex, which is required for modification of wobble nucleosides in tRNA; exhibits histone acetyltransferase activity that is directed to histones H3 and H4; disruption confers resistance to K. lactis zymotoxin			4
CC_OL_002_D02	CC_G_00322	CC1G_01078								1					YGL245W	GUS1	Glutamyl-tRNA synthetase (GluRS), forms a complex with methionyl-tRNA synthetase (Mes1p) and Arc1p; complex formation increases the catalytic efficiency of both tRNA synthetases and ensures their correct localization to the cytoplasm			4
CC_OL_002_D03	CC_G_00323	CC1G_01083																		0
CC_OL_002_D04	CC_G_00324	CC1G_01084													YOR269W	PAC1	Protein involved in nuclear migration, part of the dynein/dynactin pathway; targets dynein to microtubule tips, which is necessary for sliding of microtubules along bud cortex; synthetic lethal with bni1; homolog of human LIS1			0
CC_OL_002_D05	CC_G_00325	CC1G_01089																		0
CC_OL_002_D06	CC_A_00268
CC_OL_002_D07	CC_G_00329	CC1G_01099																		8
CC_OL_002_D08	CC_G_00330	CC1G_01102																		4
CC_OL_002_D09	CC_G_00331	CC1G_01106
CC_OL_002_D10	CC_G_00332	CC1G_01107																		3
CC_OL_002_D11	CC_G_00333	CC1G_01108													YCL017C	NFS1	Cysteine desulfurase involved in iron-sulfur cluster (Fe/S) biogenesis; required for the post-transcriptional thio-modification of mitochondrial and cytoplasmic tRNAs; essential protein located predominantly in mitochondria			0
CC_OL_002_D12	CC_G_00334	CC1G_01109
CC_OL_002_D13	CC_G_00335	CC1G_01111													YDR036C	EHD3	3-hydroxyisobutyryl-CoA hydrolase, member of a family of enoyl-CoA hydratase/isomerases; non-tagged protein is detected in highly purified mitochondria in high-throughput studies; phosphorylated; mutation affects fluid-phase endocytosis			4
CC_OL_002_D14	CC_G_00336	CC1G_01112																		0
CC_OL_002_D15	CC_G_00337	CC1G_01113													YAR007C	RFA1	Subunit of heterotrimeric Replication Protein A (RPA), which is a highly conserved single-stranded DNA binding protein involved in DNA replication, repair, and recombination			4
CC_OL_002_D16	CC_G_00338	CC1G_01114																		0
CC_OL_002_D17	CC_G_00339	CC1G_01115													YLR389C	STE23	Metalloprotease involved, with homolog Axl1p, in N-terminal processing of pro-a-factor to the mature form; member of the insulin-degrading enzyme family			1
CC_OL_002_D18																					mer3
CC_OL_002_D19	CC_A_00281	CC1G_01123																		5
CC_OL_002_D20	CC_G_00341	CC1G_01124								1					YDL124W		NADPH-dependent alpha-keto amide reductase; reduces aromatic alpha-keto amides, aliphatic alpha-keto esters, and aromatic alpha-keto esters; member of the aldo-keto reductase (AKR) family			6
CC_OL_002_D21	CC_A_00283
CC_OL_002_D22	CC_G_00343	CC1G_01126																		5
CC_OL_002_D23	CC_G_00345	CC1G_01132													YFL044C	OTU1	Deubiquitylation enzyme that binds to the chaperone-ATPase Cdc48p; may contribute to regulation of protein degradation by deubiquitylating substrates that have been ubiquitylated by Ufd2p; member of the Ovarian Tumor (OTU) family			6
CC_OL_002_D24	CC_G_00347	CC1G_01135																		0
CC_OL_002_E01	CC_G_00348	CC1G_01138													YKR092C	SRP40	Nucleolar, serine-rich protein with a role in preribosome assembly or transport; may function as a chaperone of small nucleolar ribonucleoprotein particles (snoRNPs); immunologically and structurally to rat Nopp140			4
CC_OL_002_E02	CC_G_00349	CC1G_01139
CC_OL_002_E03	CC_G_00350	CC1G_01142																		0
CC_OL_002_E04	CC_G_00351	CC1G_01144																		0
CC_OL_002_E05	CC_G_00352	CC1G_01145													YBR233W	PBP2	RNA binding protein with similarity to mammalian heterogeneous nuclear RNP K protein, involved in the regulation of telomere position effect and telomere length
CC_OL_002_E06	CC_G_00353	CC1G_01146													YOL077C	BRX1	Nucleolar protein, constituent of 66S pre-ribosomal particles; depletion leads to defects in rRNA processing and a block in the assembly of large ribosomal subunits; possesses a sigma(70)-like RNA-binding motif
CC_OL_002_E07	CC_G_00354	CC1G_01147								1										0
CC_OL_002_E08	CC_G_00355	CC1G_01148																		0
CC_OL_002_E09																					trp1
CC_OL_002_E10	CC_G_00357	CC1G_01152													YLR291C	GCD7	Beta subunit of the translation initiation factor eIF2B, the guanine-nucleotide exchange factor for eIF2; activity subsequently regulated by phosphorylated eIF2; first identified as a negative regulator of GCN4 expression			1
CC_OL_002_E11	CC_G_00358	CC1G_01154
CC_OL_002_E12	CC_G_00360	CC1G_01159																		0
CC_OL_002_E13	CC_G_00361	CC1G_01161																		0
CC_OL_002_E14	CC_G_00362	CC1G_01164													YBR065C	ECM2	Pre-mRNA splicing factor, facilitates the cooperative formation of U2/U6 helix II in association with stem II in the spliceosome, function may be regulated by Slu7p			5
CC_OL_002_E15	CC_G_00363	CC1G_01168																		0
CC_OL_002_E16	CC_G_00365	CC1G_01173								1					YLR293C	GSP1	Ran GTPase, GTP binding protein (mammalian Ranp homolog) involved in the maintenance of nuclear organization, RNA processing and transport; regulated by Prp20p, Rna1p, Yrb1p, Yrb2p, Yrp4p, Yrb30p, Cse1p and Kap95p; yeast Gsp2p homolog			4
CC_OL_002_E17	CC_G_00366	CC1G_01175													YLR344W	RPL26A	Protein component of the large (60S) ribosomal subunit, nearly identical to Rpl26Bp and has similarity to E. coli L24 and rat L26 ribosomal proteins; binds to 5.8S rRNA			4
CC_OL_002_E18	CC_G_00367	CC1G_01178													YNL081C	SWS2	Putative mitochondrial ribosomal protein of the small subunit, has similarity to E. coli S13 ribosomal protein; participates in controlling sporulation efficiency			4
CC_OL_002_E19	CC_G_00368	CC1G_01179													YKR068C	BET3	Hydrophilic protein that acts in conjunction with SNARE proteins in targeting and fusion of ER to Golgi transport vesicles; component of the TRAPP (transport protein particle) complex			3
CC_OL_002_E20	CC_G_00369	CC1G_01180													YCR047C	BUD23	Protein involved in bud-site selection; diploid mutants display a random budding pattern instead of the wild-type bipolar pattern			4
CC_OL_002_E21	CC_G_00370	CC1G_01182																		3
CC_OL_002_E22	CC_G_00374	CC1G_01187													YLR088W	GAA1	Subunit of the GPI (glycosylphosphatidylinositol):protein transamidase complex, removes the GPI-anchoring signal and attaches GPI to proteins in the ER			0
CC_OL_002_E23	CC_G_00376	CC1G_01193																		3
CC_OL_002_E24	CC_A_00310	CC1G_01196																		0
CC_OL_002_F01	CC_G_00378	CC1G_01197																		4
CC_OL_002_F02	CC_G_00379	CC1G_01199													YLR262C	YPT6	GTPase, Ras-like GTP binding protein involved in the secretory pathway, required for fusion of endosome-derived vesicles with the late Golgi, maturation of the vacuolar carboxypeptidase Y; has similarity to the human GTPase, Rab6
CC_OL_002_F03	CC_G_00380	CC1G_01201																		0
CC_OL_002_F04	CC_G_00381	CC1G_01202																		0
CC_OL_002_F05	CC_G_00384	CC1G_01209																		5
CC_OL_002_F06	CC_G_00385	CC1G_01210								1					YKL213C	DOA1	WD repeat protein required for ubiquitin-mediated protein degradation, forms complex with Cdc48p, plays a role in controlling cellular ubiquitin concentration; also promotes efficient NHEJ in postdiauxic/stationary phase
CC_OL_002_F07	CC_G_00387	CC1G_01212									1				YOL010W	RCL1	Subunit of U3-containing 90S preribosome processome complex involved in production of 18S rRNA and assembly of small ribosomal subunit; similar to RNA terminal phosphate cyclase-like proteins but RNA cyclase activity not detected			3
CC_OL_002_F08	CC_G_00388																			0
CC_OL_002_F09	CC_G_00389	CC1G_01219																		0
CC_OL_002_F10	CC_G_00390	CC1G_01220													YJR110W	YMR1	Phosphatidylinositol 3-phosphate (PI3P) phosphatase; involved in various protein sorting pathways, including CVT targeting and endosome to vacuole transport; has similarity to the conserved myotubularin dual specificity phosphatase family			0
CC_OL_002_F11	CC_G_00391	CC1G_01221									1				YLR180W	SAM1	S-adenosylmethionine synthetase, catalyzes transfer of the adenosyl group of ATP to the sulfur atom of methionine; one of two differentially regulated isozymes (Sam1p and Sam2p)
CC_OL_002_F12	CC_G_00392	CC1G_01222													YMR300C	ADE4	Phosphoribosylpyrophosphate amidotransferase (PRPPAT; amidophosphoribosyltransferase), catalyzes first step of the 'de novo' purine nucleotide biosynthetic pathway
CC_OL_002_F13	CC_G_00393	CC1G_01224																		6
CC_OL_002_F14	CC_G_00395	CC1G_01227																		0
CC_OL_002_F15	CC_G_00396	CC1G_01229													YMR078C	CTF18	Subunit of a complex with Ctf8p that shares some subunits with Replication Factor C and is required for sister chromatid cohesion; may have overlapping functions with Rad24p in the DNA damage replication checkpoint
CC_OL_002_F16	CC_G_00398	CC1G_01232													YKL154W	SRP102	Signal recognition particle (SRP) receptor beta subunit; involved in SRP-dependent protein targeting; anchors Srp101p to the ER membrane			5
CC_OL_002_F17	CC_A_00328
CC_OL_002_F18	CC_G_00401	CC1G_01238													YBR202W	MCM7	Component of the hexameric MCM complex, which is important for priming origins of DNA replication in G1 and becomes an active ATP-dependent helicase that promotes DNA melting and elongation when activated by Cdc7p-Dbf4p in S-phase			5
CC_OL_002_F19	CC_G_00402	CC1G_01240																		0
CC_OL_002_F20	CC_G_00404	CC1G_01243																		0
CC_OL_002_F21	CC_G_00405	CC1G_01244																		0
CC_OL_002_F22	CC_G_00406	CC1G_01245																		0
CC_OL_002_F23	CC_G_05359	CC1G_04277																		0
CC_OL_002_F24	CC_G_05382	CC1G_04216									1									5
CC_OL_002_G01	CC_G_05398	CC1G_04187																		3
CC_OL_002_G02	CC_G_05408	CC1G_04184								1					YGR048W	UFD1	Protein that interacts with Cdc48p and Npl4p, involved in recognition of polyubiquitinated proteins and their presentation to the 26S proteasome for degradation; involved in transporting proteins from the ER to the cytosol			0
CC_OL_002_G03	CC_G_05409	CC1G_04188																		0
CC_OL_002_G04	CC_G_05415	CC1G_04203													YER165W	PAB1	Poly(A) binding protein, part of the 3'-end RNA-processing complex, mediates interactions between the 5' cap structure and the 3' mRNA poly(A) tail, involved in control of poly(A) tail length, interacts with translation factor eIF-4G			2
CC_OL_002_G05	CC_G_05429	CC1G_04226																		0
CC_OL_002_G06	CC_A_04613	CC1G_04240																		4
CC_OL_002_G07	CC_G_05443	CC1G_04250								1					YPR024W	YME1	Catalytic subunit of the mitochondrial inner membrane i-AAA protease complex, which is responsible for degradation of unfolded or misfolded mitochondrial gene products; mutation causes an elevated rate of mitochondrial turnover
CC_OL_002_G08	CC_G_05450	CC1G_04266													YMR210W		Putative acyltransferase with similarity to Eeb1p and Eht1p, has a minor role in medium-chain fatty acid ethyl ester biosynthesis; may be involved in lipid metabolism and detoxification			0
CC_OL_002_G09	CC_G_05479	CC1G_04317													YLR027C	AAT2	Cytosolic aspartate aminotransferase, involved in nitrogen metabolism; localizes to peroxisomes in oleate-grown cells
CC_OL_002_G10	CC_G_08620	CC1G_11940																		1
CC_OL_002_G11	CC_G_08629	CC1G_11925
CC_OL_002_G12	CC_G_08626	CC1G_11928													YLR231C	BNA5	Kynureninase, required for the de novo biosynthesis of NAD from tryptophan via kynurenine; expression regulated by Hst1p			0
CC_OL_002_G13	CC_G_12294	CC1G_12961													YMR304W	UBP15	Ubiquitin-specific protease that may play a role in ubiquitin precursor processing			0
CC_OL_002_G14	CC_G_09958	CC1G_05192		1																6
CC_OL_002_G15	CC_G_09964	CC1G_05172													YPR036W	VMA13	Subunit H of the eight-subunit V1 peripheral membrane domain of the vacuolar H+-ATPase (V-ATPase), an electrogenic proton pump found throughout the endomembrane system; serves as an activator or a structural stabilizer of the V-ATPase			0
CC_OL_002_G16	CC_G_09976	CC1G_05141								1					YMR302C	YME2	Integral inner mitochondrial membrane protein with a role in maintaining mitochondrial nucleoid structure and number; mutants exhibit an increased rate of mitochondrial DNA escape; shows some sequence similarity to exonucleases
CC_OL_002_G17	CC_G_10003	CC1G_05091
CC_OL_002_G18	CC_G_10004	CC1G_05090
CC_OL_002_G19	CC_G_10034	CC1G_05121													YDR292C	SRP101	Signal recognition particle (SRP) receptor - alpha subunit; contain GTPase domains; involved in SRP-dependent protein targeting; interacts with Srp102p			0
CC_OL_002_G20	CC_G_10047	CC1G_05148								1										0
CC_OL_002_G21	CC_G_10054	CC1G_05158													YDR291W		Putative DNA helicase			3
CC_OL_002_G22	CC_G_10059	CC1G_05173													YNL252C	MRPL17	Mitochondrial ribosomal protein of the large subunit			0
CC_OL_002_G23	CC_G_10065	CC1G_05182																		0
CC_OL_002_G24	CC_G_10077	CC1G_05205								1	1				YCR012W	PGK1	3-phosphoglycerate kinase, catalyzes transfer of high-energy phosphoryl groups from the acyl phosphate of 1,3-bisphosphoglycerate to ADP to produce ATP; key enzyme in glycolysis and gluconeogenesis			0
CC_OL_002_H01	CC_G_09523	CC1G_03925													YHR193C	EGD2	Alpha subunit of the heteromeric nascent polypeptide-associated complex (NAC) involved in protein sorting and translocation, associated with cytoplasmic ribosomes			4
CC_OL_002_H02	CC_G_09526	CC1G_03918													YER007C
CC_OL_002_H03	CC_G_09530	CC1G_03906
CC_OL_002_H04	CC_A_08014	CC1G_03881													YNL244C	SUI1	Translation initiation factor eIF1; component of a complex involved in recognition of the initiator codon; modulates translation accuracy at the initiation phase
CC_OL_002_H05	CC_A_08023	CC1G_03860																		0
CC_OL_002_H06	CC_A_08025	CC1G_03857								1					YPR074C	TKL1	Transketolase, similar to Tkl2p; catalyzes conversion of xylulose-5-phosphate and ribose-5-phosphate to sedoheptulose-7-phosphate and glyceraldehyde-3-phosphate in the pentose phosphate pathway; needed for synthesis of aromatic amino acids			6
CC_OL_002_H07	CC_G_09544	CC1G_03829													YJL203W	PRP21	Subunit of the SF3a splicing factor complex, required for spliceosome assembly			4
CC_OL_002_H08	CC_G_09565	CC1G_03787													YLR351C	NIT3	Nit protein, one of two proteins in S. cerevisiae with similarity to the Nit domain of NitFhit from fly and worm and to the mouse and human Nit protein which interacts with the Fhit tumor suppressor; nitrilase superfamily member
CC_OL_002_H09	CC_G_09572	CC1G_03794																		0
CC_OL_002_H10	CC_G_09587	CC1G_03824
CC_OL_002_H11	CC_G_09592	CC1G_03835													YJR074W	MOG1	Conserved nuclear protein that interacts with GTP-Gsp1p, which is a Ran homolog of the Ras GTPase family, and stimulates nucleotide release, involved in nuclear protein import, nucleotide release is inhibited by Yrb1p			0
CC_OL_002_H12	CC_G_09601	CC1G_03850									1				YPL091W	GLR1	Cytosolic and mitochondrial glutathione oxidoreductase, converts oxidized glutathione to reduced glutathione
CC_OL_002_H13	CC_G_09627	CC1G_03912													YOR126C	IAH1	Isoamyl acetate-hydrolyzing esterase, required in balance with alcohol acetyltransferase to maintain optimal amounts of isoamyl acetate, which is particularly important in sake brewing			0
CC_OL_002_H14	CC_G_09629	CC1G_03914									1				YDR212W	TCP1	Alpha subunit of chaperonin-containing T-complex, which mediates protein folding in the cytosol; involved in maintenance of actin cytoskeleton; homolog to Drosophila melanogaster and mouse tailless complex polypeptide			4
CC_OL_002_H15	CC_G_09634	CC1G_03921													YMR152W	YIM1	Protein of unknown function; null mutant displays sensitivity to DNA damaging agents; the authentic, non-tagged protein is detected in highly purified mitochondria in high-throughput studies
CC_OL_002_H16	CC_G_09635	CC1G_03923													YGL047W	ALG13	Catalytic component of UDP-GlcNAc transferase, required for the second step of dolichyl-linked oligosaccharide synthesis; anchored to the ER membrane via interaction with Alg14p; similar to bacterial and human glycosyltransferases
CC_OL_002_H17	CC_G_09638	CC1G_03927									1				YMR186W	HSC82	Cytoplasmic chaperone of the Hsp90 family, redundant in function and nearly identical with Hsp82p, and together they are essential; expressed constitutively at 10-fold higher basal levels than HSP82 and induced 2-3 fold by heat shock
CC_OL_002_H18	CC_G_02863	CC1G_10822										1			YER090W	TRP2	Anthranilate synthase, catalyzes the initial step of tryptophan biosynthesis, forms multifunctional hetero-oligomeric anthranilate synthase:indole-3-glycerol phosphate synthase enzyme complex with Trp3p			9
CC_OL_002_H19	CC_G_02866	CC1G_10828
CC_OL_002_H20	CC_G_02872	CC1G_10843													YOR281C	PLP2	Essential protein with similarity to phosducins, which are G-protein regulators; interacts with CCT (chaperonin containing TCP-1) complex; lethality of null mutation is complemented by expression of mouse phosducin-like protein MgcPhLP			4
CC_OL_002_H21	CC_G_12345	CC1G_01582						1
CC_OL_002_H22	CC_G_12436	CC1G_01568													YOR317W	FAA1	Long chain fatty acyl-CoA synthetase with a preference for C12:0-C16:0 fatty acids; involved in the activation of imported fatty acids; localized to both lipid particles and mitochondrial outer membrane; essential for stationary phase
CC_OL_002_H23	CC_G_12445	CC1G_01592																		0
CC_OL_002_H24	CC_A_10424	CC1G_01604													YKL081W	TEF4	Translation elongation factor EF-1 gamma			3
CC_OL_002_I01	CC_G_12472	CC1G_01651													YDR456W	NHX1	Endosomal Na+/H+ exchanger, required for intracellular sequestration of Na+; required for osmotolerance to acute hypertonic shock			5
CC_OL_002_I02	CC_G_12473	CC1G_01652		1		1		1		1										7
CC_OL_002_I03	CC_G_08688	CC1G_09429													YER025W	GCD11	Gamma subunit of the translation initiation factor eIF2, involved in the identification of the start codon; binds GTP when forming the ternary complex with GTP and tRNAi-Met
CC_OL_002_I04	CC_G_11545	CC1G_08759									1
CC_OL_002_I05	CC_G_11553	CC1G_08739
CC_OL_002_I06	CC_G_11580	CC1G_08745		1							1		1
CC_OL_002_I07	CC_G_08944	CC1G_09115									1
CC_OL_002_I08	CC_G_10818	CC1G_09724
CC_OL_002_I09	CC_G_10822	CC1G_09717													YML056C	IMD4	Inosine monophosphate dehydrogenase, catalyzes the first step of GMP biosynthesis, member of a four-gene family in S. cerevisiae, constitutively expressed
CC_OL_002_I10	CC_G_10846	CC1G_09700
CC_OL_002_I11	CC_G_10849	CC1G_09705									1
CC_OL_002_I12	CC_G_10853	CC1G_09714									1				YJR047C	ANB1	Translation initiation factor eIF-5A, promotes formation of the first peptide bond; similar to and functionally redundant with Hyp2p; undergoes an essential hypusination modification; expressed under anaerobic conditions
CC_OL_002_I13	CC_G_04188	CC1G_11882													YPR052C	NHP6A	High-mobility group non-histone chromatin protein, functionally redundant with Nhp6Bp; homologous to mammalian high mobility group proteins 1 and 2; acts to recruit transcription factor Rcs1p to certain promoters
CC_OL_002_I14	CC_A_03590	CC1G_11883													YPL145C	KES1	Member of the oxysterol binding protein family, which includes seven yeast homologs; involved in negative regulation of Sec14p-dependent Golgi complex secretory functions, peripheral membrane protein that localizes to the Golgi complex			0
CC_OL_002_I15	CC_G_07276	CC1G_11191																		0
CC_OL_002_I16	CC_G_07282	CC1G_11194							1		1
CC_OL_002_I17	CC_G_07543	CC1G_02239																		0
CC_OL_002_I18	CC_G_07573	CC1G_02170
CC_OL_002_I19	CC_G_07640	CC1G_02094																		0
CC_OL_002_I20	CC_G_07653	CC1G_02125																		0
CC_OL_002_I21	CC_G_07684	CC1G_02203	1		1				1		1				YBR265W	TSC10	3-ketosphinganine reductase, catalyzes the second step in phytosphingosine synthesis, essential for growth in the absence of exogenous dihydrosphingosine or phytosphingosine, member of short chain dehydrogenase/reductase protein family
CC_OL_002_I22	CC_G_07685	CC1G_02204													YPR160W	GPH1	Non-essential glycogen phosphorylase required for the mobilization of glycogen, activity is regulated by cyclic AMP-mediated phosphorylation, expression is regulated by stress-response elements and by the HOG MAP kinase pathway
CC_OL_002_I23	CC_G_02667	CC1G_12687								1
CC_OL_002_I24	CC_G_06654	CC1G_05826		1		1									YER073W	ALD5	Mitochondrial aldehyde dehydrogenase, involved in regulation or biosynthesis of electron transport chain components and acetate formation; activated by K+; utilizes NADP+ as the preferred coenzyme; constitutively expressed
CC_OL_002_J01	CC_G_06663	CC1G_05800													YBR058C	UBP14	Ubiquitin-specific protease that specifically disassembles unanchored ubiquitin chains; involved in fructose-1,6-bisphosphatase (Fbp1p) degradation; similar to human isopeptidase T
CC_OL_002_J02	CC_G_06692	CC1G_05798
CC_OL_002_J03	CC_G_06697	CC1G_05812		1		1		1		1		1								6
CC_OL_002_J04	CC_G_06701	CC1G_05816																		1
CC_OL_002_J05	CC_G_02822	CC1G_12305
CC_OL_002_J06	CC_G_02824	CC1G_12310																		0
CC_OL_002_J07	CC_G_06552	CC1G_09809								1		1			YDR127W	ARO1	Pentafunctional arom protein, catalyzes steps 2 through 6 in the biosynthesis of chorismate, which is a precursor to aromatic amino acids
CC_OL_002_J08	CC_G_06554	CC1G_09813																		8
CC_OL_002_J09	CC_G_00720	CC1G_11478													YBR121C	GRS1	Cytoplasmic and mitochondrial glycyl-tRNA synthase that ligates glycine to the cognate anticodon bearing tRNA; transcription termination factor that may interact with the 3'-end of pre-mRNA to promote 3'-end formation			0
CC_OL_002_J10	CC_G_08184	CC1G_09926									1				YGR088W	CTT1	Cytosolic catalase T, has a role in protection from oxidative damage by hydrogen peroxide
CC_OL_002_J11	CC_G_08203
CC_OL_002_J12	CC_G_08210	CC1G_09920																		0
CC_OL_002_J13	CC_G_08722	CC1G_06499
CC_OL_002_J14	CC_G_08740	CC1G_06462													YDR390C	UBA2	Nuclear protein that acts as a heterodimer with Aos1p to activate Smt3p (SUMO) before its conjugation to proteins (sumoylation), which may play a role in protein targeting; essential for viability
CC_OL_002_J15	CC_G_08750	CC1G_06452									1									7
CC_OL_002_J16	CC_G_08769	CC1G_06503																		0
CC_OL_002_J17	CC_G_08780	CC1G_06528		1		1				1										0
CC_OL_002_J18	CC_A_08254
CC_OL_002_J19	CC_G_09817	CC1G_07287								1					YDR050C	TPI1	Triose phosphate isomerase, abundant glycolytic enzyme; mRNA half-life is regulated by iron availability; transcription is controlled by activators Reb1p, Gcr1p, and Rap1p through binding sites in the 5' non-coding region			0	tpi
CC_OL_002_J20	CC_G_09829	CC1G_07290									1
CC_OL_002_J21	CC_G_09831	CC1G_07292								1
CC_OL_002_J22	CC_G_01884	CC1G_07747								1					YLR354C	TAL1	Transaldolase, enzyme in the non-oxidative pentose phosphate pathway; converts sedoheptulose 7-phosphate and glyceraldehyde 3-phosphate to erythrose 4-phosphate and fructose 6-phosphate			7
CC_OL_002_J23	CC_G_01889	CC1G_07750													YLL045C	RPL8B	Ribosomal protein L4 of the large (60S) ribosomal subunit, nearly identical to Rpl8Ap and has similarity to rat L7a ribosomal protein; mutation results in decreased amounts of free 60S subunits			2
CC_OL_002_J24	CC_G_05232	CC1G_11781									1									0
CC_OL_002_K01	CC_G_03780	CC1G_05447
CC_OL_002_K02	CC_G_03854	CC1G_05380		1		1				1		1								6
CC_OL_002_K03	CC_G_03859	CC1G_05387													YIL155C	GUT2	Mitochondrial glycerol-3-phosphate dehydrogenase; expression is repressed by both glucose and cAMP and derepressed by non-fermentable carbon sources in a Snf1p, Rsf1p, Hap2/3/4/5 complex dependent manner			0
CC_OL_002_K04	CC_G_03869	CC1G_05414		1		1		1		1		1
CC_OL_002_K05	CC_G_01200	CC1G_08020																		0
CC_OL_002_K06	CC_A_01047
CC_OL_002_K07	CC_A_01050	CC1G_08054
CC_OL_002_K08	CC_G_07466	CC1G_13075
CC_OL_002_K09	CC_G_04192	CC1G_03467																		1
CC_OL_002_K10	CC_G_04204	CC1G_03449																			fatty acid desaturase
CC_OL_002_K11	CC_G_04227	CC1G_03403																		3
CC_OL_002_K12	CC_G_04272	CC1G_03355													YBR179C	FZO1	Mitofusin, mitochondrial integral membrane protein involved in mitochondrial fusion and mitochondrial genome maintenance; contains N-terminal GTPase domain; targeted for destruction by cytosolic components of the ubiquitin-proteasome system
CC_OL_002_K13	CC_G_04288	CC1G_03387																		0
CC_OL_002_K14	CC_G_04297	CC1G_03406																		3
CC_OL_002_K15	CC_G_04302	CC1G_03416													YJL011C	RPC17	RNA polymerase III subunit C17; physically interacts with C31, C11, and TFIIIB70; may be involved in the recruitment of pol III by the preinitiation complex
CC_OL_002_K16	CC_A_03689	CC1G_03436									1
CC_OL_002_K17	CC_G_04314	CC1G_03459																		4
CC_OL_002_K18	CC_G_00584	CC1G_07194																		0
CC_OL_002_K19	CC_G_00591	CC1G_07181																		3
CC_OL_002_K20	CC_G_00593	CC1G_07176													YOR117W	RPT5	One of six ATPases of the 19S regulatory particle of the 26S proteasome involved in the degradation of ubiquitinated substrates; recruited to the GAL1-10 promoter region upon induction of transcription			0
CC_OL_002_K21	CC_G_00597	CC1G_07172		1		1		1		1		1
CC_OL_002_K22	CC_G_00600	CC1G_07167													YJR104C	SOD1	Cytosolic superoxide dismutase; some mutations are analogous to those that cause ALS (amyotrophic lateral sclerosis) in humans			0
CC_OL_002_K23	CC_G_00602	CC1G_07162													YJL177W	RPL17B	Protein component of the large (60S) ribosomal subunit, nearly identical to Rpl17Ap and has similarity to E. coli L22 and rat L17 ribosomal proteins			4
CC_OL_002_K24	CC_A_00556	CC1G_07131									1				YGR231C	PHB2	Subunit of the prohibitin complex (Phb1p-Phb2p), a 1.2 MDa ring-shaped inner mitochondrial membrane chaperone that stabilizes newly synthesized proteins; determinant of replicative life span; involved in mitochondrial segregation
CC_OL_002_L01	CC_G_00619	CC1G_07119								1		1
CC_OL_002_L02	CC_G_00622	CC1G_07123													YKL007W	CAP1	Alpha subunit of the capping protein (CP) heterodimer (Cap1p and Cap2p) which binds to the barbed ends of actin filaments preventing further polymerization; localized predominantly to cortical actin patches			3
CC_OL_002_L03	CC_G_00631	CC1G_07140																		0
CC_OL_002_L04	CC_G_00643	CC1G_07164																		0
CC_OL_002_L05	CC_G_00655	CC1G_07190													YBL105C	PKC1	Protein serine/threonine kinase essential for cell wall remodeling during growth; localized to sites of polarized growth and the mother-daughter bud neck; homolog of the alpha, beta, and gamma isoforms of mammalian protein kinase C (PKC)			0
CC_OL_002_L06	CC_G_12266	CC1G_11697													YCR026C	NPP1	Nucleotide pyrophosphatase/phosphodiesterase family member; mediates extracellular nucleotide phosphate hydrolysis along with Npp2p and Pho5p; activity and expression enhanced during conditions of phosphate starvation
CC_OL_002_L07	CC_G_12282	CC1G_11703													YNL055C	POR1	Mitochondrial porin (voltage-dependent anion channel), outer membrane protein required for the maintenance of mitochondrial osmotic stability and mitochondrial membrane permeability; phosphorylated			0
CC_OL_002_L08	CC_G_05591	CC1G_03025													YKL209C	STE6	Plasma membrane ATP-binding cassette (ABC) transporter required for the export of a-factor, catalyzes ATP hydrolysis coupled to a-factor transport; contains 12 transmembrane domains and two ATP binding domains; expressed only in MATa cells			0
CC_OL_002_L09	CC_G_05621	CC1G_02972										1		1	YNL321W	VNX1	Low affinity vacuolar membrane localized monovalent cation/H+ antiporter; member of the calcium exchanger (CAX) family; potential Cdc28p substrate
CC_OL_002_L10	CC_G_05623	CC1G_02968																		6
CC_OL_002_L11	CC_G_05628	CC1G_02958									1		1							0
CC_OL_002_L12	CC_G_05630	CC1G_02956													YEL004W	YEA4	Uridine diphosphate-N-acetylglucosamine (UDP-GlcNAc) transporter required for cell wall chitin synthesis; localized to the ER			0
CC_OL_002_L13	CC_G_05655	CC1G_02901													YER055C	HIS1	ATP phosphoribosyltransferase, a hexameric enzyme, catalyzes the first step in histidine biosynthesis; mutations cause histidine auxotrophy and sensitivity to Cu, Co, and Ni salts; transcription is regulated by general amino acid control			0
CC_OL_002_L14	CC_G_05663	CC1G_02902					1				1									0
CC_OL_002_L15	CC_A_04837	CC1G_02993
CC_OL_002_L16	CC_A_04841	CC1G_03013
CC_OL_002_L17	CC_G_08574	CC1G_12319
CC_OL_002_L18	CC_G_08579	CC1G_12324									1				YBL056W	PTC3	Type 2C protein phosphatase; dephosphorylates Hog1p (see also Ptc2p) to limit maximal kinase activity induced by osmotic stress; dephosphorylates T169 phosphorylated Cdc28p (see also Ptc2p); role in DNA checkpoint inactivation
CC_OL_002_L19	CC_G_07737	CC1G_04997										1			YIL099W	SGA1	Intracellular sporulation-specific glucoamylase involved in glycogen degradation; induced during starvation of a/a diploids late in sporulation, but dispensable for sporulation
CC_OL_002_L20	CC_G_07808	CC1G_05055								1		1			YDL215C	GDH2	NAD(+)-dependent glutamate dehydrogenase, degrades glutamate to ammonia and alpha-ketoglutarate; expression sensitive to nitrogen catabolite repression and intracellular ammonia levels
CC_OL_002_L21	CC_A_00607	CC1G_12439									1				YIL125W	KGD1	Component of the mitochondrial alpha-ketoglutarate dehydrogenase complex, which catalyzes a key step in the tricarboxylic acid (TCA) cycle, the oxidative decarboxylation of alpha-ketoglutarate to form succinyl-CoA			0
CC_OL_002_L22	CC_G_09017	CC1G_10946									1									0
CC_OL_002_L23	CC_G_09028	CC1G_10919													YPR163C	TIF3	Translation initiation factor eIF-4B, has RNA annealing activity; contains an RNA recognition motif and binds to single-stranded RNA
CC_OL_002_L24	CC_G_09040	CC1G_10936																		0
CC_OL_002_M01	CC_G_09041	CC1G_10938
CC_OL_002_M02	CC_G_06169	CC1G_06329																		9
CC_OL_002_M03	CC_G_06192	CC1G_06270													YDR105C	TMS1	Vacuolar membrane protein of unknown function that is conserved in mammals; predicted to contain eleven transmembrane helices; interacts with Pdr5p, a protein involved in multidrug resistance			0
CC_OL_002_M04	CC_G_06188	CC1G_06285																		7
CC_OL_002_M05	CC_G_06222	CC1G_06295
CC_OL_002_M06	CC_G_06244	CC1G_06339													YCR098C	GIT1	Plasma membrane permease, mediates uptake of glycerophosphoinositol and glycerophosphocholine as sources of the nutrients inositol and phosphate; expression and transport rate are regulated by phosphate and inositol availability			0
CC_OL_002_M07	CC_G_06245	CC1G_06340													YLR196W	PWP1	Protein with WD-40 repeats involved in rRNA processing; associates with trans-acting ribosome biogenesis factors; similar to beta-transducin superfamily
CC_OL_002_M08	CC_G_06246	CC1G_06344																		3
CC_OL_002_M09	CC_G_00939	CC1G_06396													YKR009C	FOX2	Multifunctional enzyme of the peroxisomal fatty acid beta-oxidation pathway; has 3-hydroxyacyl-CoA dehydrogenase and enoyl-CoA hydratase activities			8
CC_OL_002_M10	CC_G_00979	CC1G_06393		1								1			YBR133C	HSL7	Protein arginine N-methyltransferase that exhibits septin and Hsl1p-dependent bud neck localization and periodic Hsl1p-dependent phosphorylation; required along with Hsl1p for bud neck recruitment, phosphorylation, and degradation of Swe1p			7
CC_OL_002_M11	CC_G_00986	CC1G_06410																		0
CC_OL_002_M12	CC_G_00994	CC1G_06423									1				YJR065C	ARP3	Essential component of the Arp2/3 complex, which is a highly conserved actin nucleation center required for the motility and integrity of actin patches; involved in endocytosis and membrane growth and polarity
CC_OL_002_M13	CC_G_08015	CC1G_12418													YGL187C	COX4	Subunit IV of cytochrome c oxidase, which is the terminal member of the mitochondrial inner membrane electron transport chain; N-terminal 25 residues of precursor are cleaved during mitochondrial import; phosphorylated			0
CC_OL_002_M14	CC_G_03137	CC1G_12570																		0
CC_OL_002_M15	CC_G_03145	CC1G_12569													YER107C	GLE2	Component of the nuclear pore complex required for polyadenylated RNA export but not for protein import, homologous to S. pombe Rae1p			0
CC_OL_002_M16	CC_G_07846	CC1G_07085									1
CC_OL_002_M17	CC_G_07866									1
CC_OL_002_M18	CC_G_07876	CC1G_07058
CC_OL_002_M19	CC_G_07881	CC1G_07064						1							YPL231W	FAS2	Alpha subunit of fatty acid synthetase, which catalyzes the synthesis of long-chain saturated fatty acids; contains beta-ketoacyl reductase and beta-ketoacyl synthase activities; phosphorylated
CC_OL_002_M20	CC_G_07882	CC1G_07067								1										0
CC_OL_002_M21	CC_G_07897	CC1G_07096									1
CC_OL_002_M22	CC_G_07903	CC1G_07109													YML131W		Putative protein of unknown function with similarity to medium chain dehydrogenase/reductases; expression induced by stresses including osmotic shock, DNA damaging agents, and other chemicals; GFP-fusion protein localizes to the cytoplasm			0
CC_OL_002_M23	CC_G_05538	CC1G_07602										1
CC_OL_002_M24	CC_G_05546	CC1G_07583								1					YMR214W	SCJ1	One of several homologs of bacterial chaperone DnaJ, located in the ER lumen where it cooperates with Kar2p to mediate maturation of proteins
CC_OL_002_N01	CC_G_04951	CC1G_10062													YCL047C		Putative protein of unknown function			0
CC_OL_002_N02	CC_G_10338	CC1G_06225																		7
CC_OL_002_N03	CC_G_10343	CC1G_06210
CC_OL_002_N04	CC_G_10360	CC1G_06175									1
CC_OL_002_N05	CC_G_10363	CC1G_06170													YDR196C		Putative dephospho-CoA kinase (DPCK) that catalyzes the final step in Coenzyme A biosynthesis; essential for viability; the authentic, non-tagged protein is detected in highly purified mitochondria in high-throughput studies
CC_OL_002_N06	CC_G_10388	CC1G_06209																		0
CC_OL_002_N07	CC_G_10398	CC1G_06231
CC_OL_002_N08	CC_G_10400
CC_OL_002_N09	CC_G_10408	CC1G_06255								1					YML067C	ERV41	Protein localized to COPII-coated vesicles, forms a complex with Erv46p; involved in the membrane fusion stage of transport; has homology to human ERGIC2 (PTX1) protein			6
CC_OL_002_N10	CC_G_05184	CC1G_08095																		6
CC_OL_002_N11	CC_G_11010	CC1G_04061																		0	coH24
CC_OL_002_N12	CC_G_11046	CC1G_04120									1				YPR020W	ATP20	Subunit g of the mitochondrial F1F0 ATP synthase; reversibly phosphorylated on two residues; unphosphorylated form is required for dimerization of the ATP synthase complex			4
CC_OL_002_N13	CC_G_02172	CC1G_00464								1					YOR370C	MRS6	Rab escort protein, forms a complex with the Ras-like small GTPase Ypt1p that is required for the prenylation of Ypt1p by protein geranylgeranyltransferase type II (Bet2p-Bet4p)			0
CC_OL_002_N14	CC_G_02175	CC1G_00461													YKL016C	ATP7	Subunit d of the stator stalk of mitochondrial F1F0 ATP synthase, which is a large, evolutionarily conserved enzyme complex required for ATP synthesis
CC_OL_002_N15	CC_G_02196	CC1G_00417													YFL022C	FRS2	Alpha subunit of cytoplasmic phenylalanyl-tRNA synthetase, forms a tetramer with Frs1p to form active enzyme; evolutionarily distant from mitochondrial phenylalanyl-tRNA synthetase based on protein sequence, but substrate binding is similar			0
CC_OL_002_N16	CC_G_02229	CC1G_00344										1		1	YCL043C	PDI1	Protein disulfide isomerase, multifunctional protein resident in the endoplasmic reticulum lumen, essential for the formation of disulfide bonds in secretory and cell-surface proteins, unscrambles non-native disulfide bonds
CC_OL_002_N17	CC_G_02244	CC1G_00317													YNL241C	ZWF1	Glucose-6-phosphate dehydrogenase (G6PD), catalyzes the first step of the pentose phosphate pathway; involved in adapting to oxidatve stress; homolog of the human G6PD which is deficient in patients with hemolytic anemia			0
CC_OL_002_N18	CC_G_02255	CC1G_00298																		4
CC_OL_002_N19	CC_G_02280	CC1G_00238													YML063W	RPS1B	Ribosomal protein 10 (rp10) of the small (40S) subunit; nearly identical to Rps1Ap and has similarity to rat S3a ribosomal protein			4
CC_OL_002_N20	CC_G_02300
CC_OL_002_N21	CC_G_02316	CC1G_00147													YIL053W	RHR2	Constitutively expressed isoform of DL-glycerol-3-phosphatase; involved in glycerol biosynthesis, induced in response to both anaerobic and, along with the Hor2p/Gpp2p isoform, osmotic stress
CC_OL_002_N22	CC_G_02336	CC1G_00095									1				YDR397C	NCB2	Subunit of a heterodimeric NC2 transcription regulator complex with Bur6p; complex binds to TBP and can repress transcription by preventing preinitiation complex assembly or stimulate activated transcription; homologous to human NC2beta
CC_OL_002_N23	CC_G_02340	CC1G_00086																		0
CC_OL_002_N24	CC_G_02359	CC1G_00058								1					YDR232W	HEM1	5-aminolevulinate synthase, catalyzes the first step in the heme biosynthetic pathway; an N-terminal signal sequence is required for localization to the mitochondrial matrix; expression is regulated by Hap2p-Hap3p
CC_OL_002_O01	CC_G_02379	CC1G_00016													YGL010W		Putative protein of unknown function; YGL010W is not an essential gene			0
CC_OL_002_O02	CC_G_02398	CC1G_00036								1					YLR420W	URA4	Dihydroorotase, catalyzes the third enzymatic step in the de novo biosynthesis of pyrimidines, converting carbamoyl-L-aspartate into dihydroorotate			0
CC_OL_002_O03	CC_G_02405	CC1G_00051													YKR071C	DRE2	Protein of unknown function required for iron-sulfur cluster assembly and sister chromatid cohesion; mutation displays synthetic lethal interaction with the pol3-13 allele of CDC2
CC_OL_002_O04	CC_G_02447	CC1G_00133													YMR314W	PRE5	Alpha 6 subunit of the 20S proteasome
CC_OL_002_O05	CC_A_02134	CC1G_00146													YML085C	TUB1	Alpha-tubulin; associates with beta-tubulin (Tub2p) to form tubulin dimer, which polymerizes to form microtubules			0	alpha2 tubulin
CC_OL_002_O06	CC_G_02461	CC1G_00158										1		1
CC_OL_002_O07	CC_G_02468	CC1G_00173																		4
CC_OL_002_O08	CC_G_02473	CC1G_00183																		3
CC_OL_002_O09	CC_A_02158	CC1G_00201													YJL026W	RNR2	Ribonucleotide-diphosphate reductase (RNR), small subunit; the RNR complex catalyzes the rate-limiting step in dNTP synthesis and is regulated by DNA replication and DNA damage checkpoint pathways via localization of the small subunits			0
CC_OL_002_O10	CC_G_02484	CC1G_00206													YJR054W		Vacuolar protein of unknown function; potential Cdc28p substrate
CC_OL_002_O11	CC_G_02496	CC1G_00224													YML092C	PRE8	Alpha 2 subunit of the 20S proteasome			2
CC_OL_002_O12	CC_G_02500	CC1G_00231																		0
CC_OL_002_O13	CC_G_02519	CC1G_00270									1									0
CC_OL_002_O14	CC_G_02525	CC1G_00284													YFL028C	CAF16	Part of the evolutionarily-conserved CCR4-NOT transcriptional regulatory complex involved in controlling mRNA initiation, elongation, and degradation; putative ABC ATPase; interacts with Ssn2p, Ssn3p, and Ssn8p			0
CC_OL_002_O15	CC_G_02540	CC1G_00310													YOR198C	BFR1	Component of mRNP complexes associated with polyribosomes; implicated in secretion and nuclear segregation; multicopy suppressor of BFA (Brefeldin A) sensitivity
CC_OL_002_O16	CC_G_02541	CC1G_00312													YFL002C	SPB4	Putative ATP-dependent RNA helicase, nucleolar protein required for synthesis of 60S ribosomal subunits at a late step in the pathway; sediments with 66S pre-ribosomes in sucrose gradients			0
CC_OL_002_O17	CC_G_02548	CC1G_00332													YPL154C	PEP4	Vacuolar aspartyl protease (proteinase A), required for the posttranslational precursor maturation of vacuolar proteinases; important for protein turnover after oxidative damage; synthesized as a zymogen, self-activates			0
CC_OL_002_O18	CC_G_02559	CC1G_00350													YOR136W	IDH2	Subunit of mitochondrial NAD(+)-dependent isocitrate dehydrogenase, which catalyzes the oxidation of isocitrate to alpha-ketoglutarate in the TCA cycle; phosphorylated			0
CC_OL_002_O19	CC_G_02560	CC1G_00351													YDR293C	SSD1	Protein with a role in maintenance of cellular integrity, interacts with components of the TOR pathway; ssd1 mutant of a clinical S. cerevisiae strain displays elevated virulence			0
CC_OL_002_O20	CC_G_02562	CC1G_00359													YFR041C	ERJ5	Type I membrane protein with a J domain is required to preserve the folding capacity of the endoplasmic reticulum; loss of the non-essential ERJ5 gene leads to a constitutively induced unfolded protein response			4
CC_OL_002_O21	CC_G_02566	CC1G_00362								1					YPR035W	GLN1	Glutamine synthetase (GS), synthesizes glutamine from glutamate and ammonia; with Glt1p, forms the secondary pathway for glutamate biosynthesis from ammonia; expression regulated by nitrogen source and by amino acid limitation			8
CC_OL_002_O22	CC_G_02569	CC1G_00367													YCL030C	HIS4	Multifunctional enzyme containing phosphoribosyl-ATP pyrophosphatase, phosphoribosyl-AMP cyclohydrolase, and histidinol dehydrogenase activities; catalyzes the second, third, ninth and tenth steps in histidine biosynthesis			1
CC_OL_002_O23	CC_G_02572	CC1G_00372													YNL037C	IDH1	Subunit of mitochondrial NAD(+)-dependent isocitrate dehydrogenase, which catalyzes the oxidation of isocitrate to alpha-ketoglutarate in the TCA cycle
CC_OL_002_O24	CC_A_02242	CC1G_00380																		0
CC_OL_002_P01	CC_G_02583	CC1G_00395									1				YNL067W	RPL9B	Protein component of the large (60S) ribosomal subunit, nearly identical to Rpl9Ap and has similarity to E. coli L6 and rat L9 ribosomal proteins			4
CC_OL_002_P02	CC_G_02585	CC1G_00400
CC_OL_002_P03	CC_G_02592	CC1G_00412													YLR060W	FRS1	Beta subunit of cytoplasmic phenylalanyl-tRNA synthetase, forms a tetramer with Frs2p to generate active enzyme; sequence is evolutionarily distant from mitochondrial phenylalanyl-tRNA synthetase (Msf1p), but substrate binding is similar			2
CC_OL_002_P04	CC_G_02610	CC1G_00435																		0
CC_OL_002_P05	CC_G_01947	CC1G_01456
CC_OL_002_P06	CC_G_01972	CC1G_01407
CC_OL_002_P07	CC_G_01974	CC1G_01401
CC_OL_002_P08	CC_G_01992	CC1G_01359									1				YEL011W	GLC3	Glycogen branching enzyme, involved in glycogen accumulation; green fluorescent protein (GFP)-fusion protein localizes to the cytoplasm in a punctate pattern
CC_OL_002_P09	CC_G_01994	CC1G_01355													YOR087W	YVC1	Vacuolar cation channel, mediates release of Ca(2+) from the vacuole in response to hyperosmotic shock			0
CC_OL_002_P10	CC_G_02008	CC1G_01328													YHR087W		Protein of unknown function involved in RNA metabolism; has structural similarity to SBDS, the human protein mutated in Shwachman-Diamond Syndrome (the yeast SBDS ortholog = SDO1); null mutation suppresses cdc13-1 temperature sensitivity
CC_OL_002_P11	CC_G_02014	CC1G_01322													YNL139C	THO2	Subunit of the THO complex, which is required for efficient transcription elongation and involved in transcriptional elongation-associated recombination; required for LacZ RNA expression from certain plasmids
CC_OL_002_P12	CC_G_02031	CC1G_01293								1					YOR096W	RPS7A	Protein component of the small (40S) ribosomal subunit, nearly identical to Rps7Bp; interacts with Kti11p; deletion causes hypersensitivity to zymocin; has similarity to rat S7 and Xenopus S8 ribosomal proteins			4
CC_OL_002_P13	CC_G_02035	CC1G_01283													YLR452C	SST2	GTPase-activating protein for Gpa1p, regulates desensitization to alpha factor pheromone; also required to prevent receptor-independent signaling of the mating pathway; member of the RGS (regulator of G-protein signaling) family
CC_OL_002_P14	CC_G_02048	CC1G_01253
CC_OL_002_P15	CC_G_02053	CC1G_01254
CC_OL_002_P16	CC_G_02056	CC1G_01261													YNR047W		Putative protein kinase that, when overexpressed, interferes with pheromone-induced growth arrest; localizes to the cytoplasm; potential Cdc28p substrate
CC_OL_002_P17	CC_G_02070	CC1G_01290													YOR063W	RPL3	Protein component of the large (60S) ribosomal subunit, has similarity to E. coli L3 and rat L3 ribosomal proteins; involved in the replication and maintenance of killer double stranded RNA virus			4
CC_OL_002_P18	CC_G_02073	CC1G_01298													YIL038C	NOT3	Subunit of the CCR4-NOT complex, which is a global transcriptional regulator with roles in transcription initiation and elongation and in mRNA degradation			4
CC_OL_002_P19	CC_G_02102	CC1G_01356													YLR370C	ARC18	Subunit of the ARP2/3 complex, which is required for the motility and integrity of cortical actin patches			2
CC_OL_002_P20	CC_A_01847	CC1G_01375								1										0	alpha1 tubulin
CC_OL_002_P21	CC_G_02114	CC1G_01383													YJR090C	GRR1	F-box protein component of the SCF ubiquitin-ligase complex; involved in carbon catabolite repression, glucose-dependent divalent cation transport, high-affinity glucose transport, morphogenesis, and sulfite detoxification
CC_OL_002_P22	CC_G_02116	CC1G_01388													YKL125W	RRN3	Protein required for transcription of rDNA by RNA polymerase I; transcription factor independent of DNA template; involved in recruitment of RNA polymerase I to rDNA			0
CC_OL_002_P23	CC_G_02118	CC1G_01392								1					YGL203C	KEX1	Protease involved in the processing of killer toxin and alpha factor precursor; cleaves Lys and Arg residues from the C-terminus of peptides and proteins			7
CC_OL_002_P24	CC_A_01859	CC1G_01406													YMR047C	NUP116	Subunit of the nuclear pore complex (NPC) that is localized to both sides of the pore; contains a repetitive GLFG motif that interacts with mRNA export factor Mex67p and with karyopherin Kap95p; homologous to Nup100p
CC_OL_003_A01	CC_G_02126	CC1G_01418													YDR099W	BMH2	14-3-3 protein, minor isoform; controls proteome at post-transcriptional level, binds proteins and DNA, involved in regulation of many processes including exocytosis, vesicle transport, Ras/MAPK signaling, and rapamycin-sensitive signaling			0
CC_OL_003_A02	CC_G_11933	CC1G_08162
CC_OL_003_A03	blank
CC_OL_003_A04	CC_G_11897	CC1G_08143																		0
CC_OL_003_A05	CC_G_11922	CC1G_08134													YDR400W	URH1	Uridine nucleosidase (uridine-cytidine N-ribohydrolase), cleaves N-glycosidic bonds in nucleosides; involved in the pyrimidine salvage and nicotinamide riboside salvage pathways
CC_OL_003_A06	CC_G_11934
CC_OL_003_A07	CC_G_11134	CC1G_08678
CC_OL_003_A08	CC_G_10441	CC1G_06970								1										7
CC_OL_003_A09	CC_G_10444	CC1G_06964
CC_OL_003_A10	CC_G_10445	CC1G_06963									1				YHR008C	SOD2	Mitochondrial superoxide dismutase, protects cells against oxygen toxicity; phosphorylated
CC_OL_003_A11	CC_G_10460	CC1G_06939													YHR168W	MTG2	Putative GTPase, member of the Obg family; peripheral protein of the mitochondrial inner membrane that associates with the large ribosomal subunit; required for mitochondrial translation, possibly via a role in ribosome assembly
CC_OL_003_A12	CC_G_10463	CC1G_06932									1				YMR178W		Putative protein of unknown function; green fluorescent protein (GFP)-fusion protein localizes to both the cytoplasm and nucleus and is induced in response to the DNA-damaging agent MMS; YMR178W is not an essential gene
CC_OL_003_A13	CC_G_10496	CC1G_06951																		0
CC_OL_003_A14	CC_G_08960	CC1G_12474																		0
CC_OL_003_A15	CC_G_00903	CC1G_11437									1									7
CC_OL_003_A16	CC_G_00907	CC1G_11438													YER048W
CC_OL_003_A17	CC_G_00908	CC1G_11441								1					YOR182C	RPS30B	Protein component of the small (40S) ribosomal subunit; nearly identical to Rps30Ap and has similarity to rat S30 ribosomal protein
CC_OL_003_A18	CC_G_08137	CC1G_09860
CC_OL_003_A19	CC_A_06861	CC1G_09830
CC_OL_003_A20	CC_G_08160	CC1G_09823								1										0
CC_OL_003_A21	CC_A_10450	CC1G_10323								1										0
CC_OL_003_A22	CC_G_12494	CC1G_10314
CC_OL_003_A23	CC_G_12508	CC1G_10315		1
CC_OL_003_A24	CC_G_12515	CC1G_10334													YML010W	SPT5	Protein that forms a complex with Spt4p and mediates both activation and inhibition of transcription elongation; Spt4p-Spt5p complex also plays a role in pre-mRNA processing			0
CC_OL_003_B01	CC_G_03082	CC1G_11986													YGL253W	HXK2	Hexokinase isoenzyme 2 that catalyzes phosphorylation of glucose in the cytosol; predominant hexokinase during growth on glucose; functions in the nucleus to repress expression of HXK1 and GLK1 and to induce expression of its own gene			0
CC_OL_003_B02	CC_G_05015	CC1G_09510													YBR039W	ATP3	Gamma subunit of the F1 sector of mitochondrial F1F0 ATP synthase, which is a large, evolutionarily conserved enzyme complex required for ATP synthesis			0
CC_OL_003_B03	CC_G_05019	CC1G_09516																		0
CC_OL_003_B04	CC_G_00817	CC1G_07543
CC_OL_003_B05	CC_G_00835	CC1G_07505
CC_OL_003_B06	CC_G_00838	CC1G_07500													YLR406C	RPL31B	Protein component of the large (60S) ribosomal subunit, nearly identical to Rpl31Ap and has similarity to rat L31 ribosomal protein; associates with the karyopherin Sxm1p; loss of both Rpl31p and Rpl39p confers lethality			4
CC_OL_003_B07	CC_G_00842	CC1G_07492								1										0
CC_OL_003_B08	CC_G_04325																			0
CC_OL_003_B09	CC_G_04326	CC1G_05645
CC_OL_003_B10	CC_G_04327	CC1G_05643								1										0
CC_OL_003_B11	CC_A_03707
CC_OL_003_B12	CC_G_04329	CC1G_05638																		0
CC_OL_003_B13	CC_G_04330	CC1G_05636																		0
CC_OL_003_B14																				0	pcna
CC_OL_003_B15	CC_A_03711	CC1G_05632																		6
CC_OL_003_B16	CC_G_04334	CC1G_05630																		0
CC_OL_003_B17	CC_A_03713	CC1G_05627																		0
CC_OL_003_B18		CC1G_05626
CC_OL_003_B19	CC_A_03715	CC1G_05623																		0
CC_OL_003_B20	CC_A_03716	CC1G_05621						1												0
CC_OL_003_B21	CC_A_03717	CC1G_05616
CC_OL_003_B22	CC_A_03718	CC1G_05615																		0
CC_OL_003_B23	CC_G_04342	CC1G_05613																		0
CC_OL_003_B24	CC_A_03720	CC1G_05609																		0
CC_OL_003_C01	CC_A_03721	CC1G_05608																		1
CC_OL_003_C02	CC_A_03722	CC1G_05607																		0
CC_OL_003_C03	CC_A_03723	CC1G_05602																		0
CC_OL_003_C04	CC_A_03724	CC1G_05599																		0
CC_OL_003_C05	CC_G_04343	CC1G_05597																		0
CC_OL_003_C06		CC1G_05596
CC_OL_003_C07		CC1G_05595
CC_OL_003_C08	CC_A_03728	CC1G_05594																		0
CC_OL_003_C09	CC_A_03729	CC1G_05592																		0
CC_OL_003_C10	CC_A_03730	CC1G_05590						1												0
CC_OL_003_C11	CC_A_03731	CC1G_05590
CC_OL_003_C12	CC_A_03732	CC1G_05588																		0
CC_OL_003_C13	CC_A_03733	CC1G_05583																		0
CC_OL_003_C14	CC_G_04346	CC1G_05582													YNR050C	LYS9	Saccharopine dehydrogenase (NADP+, L-glutamate-forming); catalyzes the formation of saccharopine from alpha-aminoadipate 6-semialdehyde, the seventh step in lysine biosynthesis pathway; exhibits genetic and physical interactions with TRM112			2
CC_OL_003_C15	CC_A_03735	CC1G_05580							1											0
CC_OL_003_C16	CC_G_04347	CC1G_05575																		0
CC_OL_003_C17	CC_G_04348	CC1G_05571																		0
CC_OL_003_C18	CC_A_03738	CC1G_05570																		0
CC_OL_003_C19	CC_A_03739	CC1G_05570
CC_OL_003_C20	CC_A_03740	CC1G_05568													YGR246C	BRF1	TFIIIB B-related factor, one of three subunits of RNA polymerase III transcription initiation factor TFIIIB, binds TFIIIC and TBP and recruits RNA pol III to promoters, amino-terminal half is homologous to TFIIB
CC_OL_003_C21	CC_G_04349	CC1G_05566																		0
CC_OL_003_C22	CC_A_03742	CC1G_05563																		0
CC_OL_003_C23	CC_A_03743	CC1G_05554																		0
CC_OL_003_C24	CC_A_03744	CC1G_05548																		0
CC_OL_003_D01	CC_A_03745	CC1G_05545																		8
CC_OL_003_D02	CC_G_04350	CC1G_05546								1										0
CC_OL_003_D03	CC_G_04351	CC1G_05552																		0
CC_OL_003_D04	CC_G_04352	CC1G_05555																		0
CC_OL_003_D05	CC_G_04353	CC1G_05556																		8
CC_OL_003_D06	CC_G_04354	CC1G_05557
CC_OL_003_D07	CC_G_04355	CC1G_05558																		0
CC_OL_003_D08	CC_G_04356	CC1G_05559																		0
CC_OL_003_D09	CC_G_04357	CC1G_05560
CC_OL_003_D10	CC_G_04358	CC1G_05564																		0
CC_OL_003_D11	CC_G_04359	CC1G_05565				1				1		1								0
CC_OL_003_D12	CC_A_03756	CC1G_05565
CC_OL_003_D13	CC_G_04361	CC1G_05567																		0
CC_OL_003_D14	CC_G_04363	CC1G_05572																		0
CC_OL_003_D15	CC_G_04364	CC1G_05573																		0
CC_OL_003_D16	CC_A_03760	CC1G_05574
CC_OL_003_D17	CC_G_04366	CC1G_05576																		0
CC_OL_003_D18	CC_G_04367	CC1G_05577													YLR178C	TFS1	Carboxypeptidase Y inhibitor, function requires acetylation by the NatB N-terminal acetyltransferase; phosphatidylethanolamine-binding protein involved in protein kinase A signaling pathway			0
CC_OL_003_D19	CC_G_04368	CC1G_05578													YDL090C	RAM1	Beta subunit of the CAAX farnesyltransferase (FTase) that prenylates the a-factor mating pheromone and Ras proteins; required for the membrane localization of Ras proteins and a-factor; homolog of the mammalian FTase beta subunit
CC_OL_003_D20	CC_G_04370	CC1G_05581
CC_OL_003_D21	CC_A_03765	CC1G_05585																		0
CC_OL_003_D22	CC_G_04372	CC1G_05586																		0
CC_OL_003_D23	CC_G_04373	CC1G_05589																		0
CC_OL_003_D24	CC_G_04374	CC1G_05591																		0
CC_OL_003_E01	CC_G_04376	CC1G_05598																		6
CC_OL_003_E02	CC_G_04379	CC1G_05603																		5
CC_OL_003_E03	CC_G_04380	CC1G_05604																		0
CC_OL_003_E04	CC_G_04381	CC1G_05605																		0
CC_OL_003_E05	CC_G_04382	CC1G_05611																		0
CC_OL_003_E06	CC_G_04383	CC1G_05614																		0
CC_OL_003_E07	CC_G_04384	CC1G_05617																		0
CC_OL_003_E08	CC_A_03776	CC1G_05619									1				YLR208W	SEC13	Component of both the Nup84 nuclear pore sub-complex and of the COPII complex (Sar1p, Sec13p, Sec16p, Sec23p, Sec24p, Sec31p, Sfb2p, and Sfb3p) which is important for the formation of ER to Golgi transport vesicles
CC_OL_003_E09	CC_G_04386	CC1G_05620																		0
CC_OL_003_E10	CC_G_04388	CC1G_05629
CC_OL_003_E11	CC_G_04389	CC1G_05631																		0
CC_OL_003_E12	CC_G_04390	CC1G_05634																		0
CC_OL_003_E13	CC_A_03781	CC1G_05647									1
CC_OL_003_E14	CC_G_04396	CC1G_05650													YDL161W	ENT1	Epsin-like protein involved in endocytosis and actin patch assembly and functionally redundant with Ent2p; binds clathrin via a clathrin-binding domain motif at C-terminus
CC_OL_003_E15	CC_G_04397	CC1G_05651		1
CC_OL_003_E16	CC_G_04398	CC1G_05652
CC_OL_003_E17	CC_G_04399	CC1G_05653
CC_OL_003_E18	CC_G_04400	CC1G_05654																		0
CC_OL_003_E19	CC_G_03413	CC1G_13098																		4
CC_OL_003_E20	CC_A_03788	CC1G_05656																		0
CC_OL_003_E21	CC_G_04403	CC1G_05657																		0
CC_OL_003_E22	CC_G_03408	CC1G_13099																		0
CC_OL_003_E23	CC_G_03410	CC1G_13095
CC_OL_003_E24	CC_G_03412	CC1G_13096
CC_OL_003_F01	CC_G_03414	CC1G_13098
CC_OL_003_F02	CC_A_09402	CC1G_12238									1				YDR121W	DPB4	Shared subunit of DNA polymerase (II) epsilon and of ISW2/yCHRAC chromatin accessibility complex; involved in both chromosomal DNA replication and in inheritance of telomeric silencing			0
CC_OL_003_F03	CC_G_11188	CC1G_12237							1											0
CC_OL_003_F04	CC_G_11189	CC1G_12236																		0
CC_OL_003_F05	CC_G_11190	CC1G_12235													YLR069C	MEF1	Mitochondrial elongation factor involved in translational elongation			0
CC_OL_003_F06	CC_G_11191	CC1G_12234													YBR079C	RPG1	Subunit of the core complex of translation initiation factor 3(eIF3), essential for translation; part of a subcomplex (Prt1p-Rpg1p-Nip1p) that stimulates binding of mRNA and tRNA(i)Met to ribosomes			0
CC_OL_003_F07	CC_G_11192	CC1G_12231													YGR217W	CCH1	Voltage-gated high-affinity calcium channel involved in calcium influx in response to some environmental stresses as well as exposure to mating pheromones; interacts and co-localizes with Mid1p, suggesting Cch1p and Mid1p function together			9
CC_OL_003_F08	CC_G_11193	CC1G_12233																		0
CC_OL_003_F09	CC_G_11196	CC1G_12244																		0
CC_OL_003_F10	CC_G_07174	CC1G_07994																		0
CC_OL_003_F11	CC_G_07175	CC1G_07992													YGR125W		Putative protein of unknown function; deletion mutant has decreased rapamycin resistance but normal wormannin resistance; green fluorescent protein (GFP)-fusion protein localizes to the vacuole			0
CC_OL_003_F12	CC_G_07176	CC1G_07990							1											0
CC_OL_003_F13	CC_G_07177	CC1G_07989																		0
CC_OL_003_F14	CC_G_07178	CC1G_07987																		4
CC_OL_003_F15	CC_G_07179	CC1G_07981																		3
CC_OL_003_F16	CC_G_07180	CC1G_07980																		3
CC_OL_003_F17	CC_G_07183	CC1G_07973																		0
CC_OL_003_F18	CC_G_07184	CC1G_07972																		0
CC_OL_003_F19	CC_G_07185
CC_OL_003_F20	CC_G_07186	CC1G_07965																		5
CC_OL_003_F21	CC_G_07187	CC1G_07964									1									0
CC_OL_003_F22	CC_G_07188	CC1G_07962										1
CC_OL_003_F23	CC_G_07190	CC1G_07960																		2
CC_OL_003_F24	CC_G_07191	CC1G_07957																		9
CC_OL_003_G01	CC_G_07192	CC1G_07956																		0
CC_OL_003_G02	CC_G_07193	CC1G_07954																		0
CC_OL_003_G03	CC_G_07195	CC1G_07949																		0
CC_OL_003_G04	CC_G_07196	CC1G_07947																		9
CC_OL_003_G05	CC_A_06094	CC1G_07940																		0
CC_OL_003_G06	CC_G_07198	CC1G_07938																		0
CC_OL_003_G07	CC_A_06096	CC1G_07937																		8
CC_OL_003_G08	CC_G_07200	CC1G_07939													YNL297C	MON2	Peripheral membrane protein with a role in endocytosis and vacuole integrity, interacts with Arl1p and localizes to the endosome; member of the Sec7p family of proteins			0
CC_OL_003_G09	CC_G_07201	CC1G_07941																		0
CC_OL_003_G10	CC_A_06099	CC1G_07944
CC_OL_003_G11	CC_G_07204	CC1G_07945								1										7
CC_OL_003_G12	CC_G_07205	CC1G_07946
CC_OL_003_G13	CC_G_07206	CC1G_07951																		0
CC_OL_003_G14	CC_G_07208	CC1G_07953																		2
CC_OL_003_G15	CC_G_07209	CC1G_07955													YDL116W	NUP84	Subunit of the nuclear pore complex (NPC), forms a subcomplex with Nup85p, Nup120p, Nup145p-C, Sec13p, and Seh1p that plays a role in nuclear mRNA export and NPC biogenesis			0
CC_OL_003_G16	CC_G_07210	CC1G_07958																		0
CC_OL_003_G17	CC_G_07211	CC1G_07959																		0
CC_OL_003_G18	CC_G_07212																			3
CC_OL_003_G19	CC_G_07213	CC1G_07967													YFR038W	IRC5	Putative ATPase containing the DEAD/H helicase-related sequence motif; null mutant displays increased levels of spontaneous Rad52p foci			0
CC_OL_003_G20	CC_G_07214	CC1G_07968
CC_OL_003_G21	CC_G_07215	CC1G_07969																		0
CC_OL_003_G22	CC_G_07216	CC1G_07970													YNL082W	PMS1	ATP-binding protein required for mismatch repair in mitosis and meiosis; functions as a heterodimer with Mlh1p, binds double- and single-stranded DNA via its N-terminal domain, similar to E. coli MutL			0
CC_OL_003_G23	CC_A_06112	CC1G_07971																		0
CC_OL_003_G24	CC_A_06113	CC1G_07974								1
CC_OL_003_H01	CC_G_07220	CC1G_07975																		7
CC_OL_003_H02	CC_G_07221	CC1G_07979													YML094W	GIM5	Subunit of the heterohexameric cochaperone prefoldin complex which binds specifically to cytosolic chaperonin and transfers target proteins to it			4
CC_OL_003_H03	CC_G_07222	CC1G_07982																		0
CC_OL_003_H04	CC_G_07224	CC1G_07984													YKL004W	AUR1	Phosphatidylinositol:ceramide phosphoinositol transferase (IPC synthase), required for sphingolipid synthesis; can mutate to confer aureobasidin A resistance			0
CC_OL_003_H05	CC_G_07225	CC1G_07985																		7
CC_OL_003_H06	CC_G_07226	CC1G_07988									1				YFL011W	HXT10	Putative hexose transporter, expressed at low levels and expression is repressed by glucose			0
CC_OL_003_H07	CC_G_07228	CC1G_07991																		6
CC_OL_003_H08	CC_G_07229	CC1G_07993																		0
CC_OL_003_H09	CC_G_10209	CC1G_04816																		0
CC_OL_003_H10	CC_G_10210	CC1G_04814																		0
CC_OL_003_H11	CC_G_10211	CC1G_04812								1										0
CC_OL_003_H12	CC_A_08591	CC1G_04807																		7
CC_OL_003_H13	CC_G_10213	CC1G_04806																		1
CC_OL_003_H14	CC_G_10214	CC1G_04801										1								9
CC_OL_003_H15	CC_G_10215	CC1G_04796
CC_OL_003_H16	CC_G_10221	CC1G_04786
CC_OL_003_H17	CC_G_10222	CC1G_04785									1									7
CC_OL_003_H18	CC_G_10223	CC1G_04783								1										0
CC_OL_003_H19	CC_A_08598	CC1G_04780																		0
CC_OL_003_H20	CC_G_10225	CC1G_04779																		0
CC_OL_003_H21	CC_G_10227	CC1G_04775																		0
CC_OL_003_H22	CC_G_10228	CC1G_04772																		0
CC_OL_003_H23	CC_G_10229	CC1G_04772
CC_OL_003_H24	CC_G_10230	CC1G_04768																		0
CC_OL_003_I01	CC_G_10231	CC1G_04767													YML015C	TAF11	TFIID subunit (40 kDa), involved in RNA polymerase II transcription initiation, similar to histone H3 with atypical histone fold motif of Spt3-like transcription factors
CC_OL_003_I02	CC_A_08605	CC1G_04766																		0
CC_OL_003_I03	CC_G_10232	CC1G_04765													YPL170W	DAP1	Heme-binding protein involved in regulation of cytochrome P450 protein Erg11p; damage response protein, related to mammalian membrane progesterone receptors; mutations lead to defects in telomeres, mitochondria, and sterol synthesis
CC_OL_003_I04	CC_G_10234	CC1G_04764													YJL130C	URA2	Bifunctional carbamoylphosphate synthetase (CPSase)-aspartate transcarbamylase (ATCase), catalyzes the first two enzymatic steps in the de novo biosynthesis of pyrimidines; both activities are subject to feedback inhibition by UTP			3
CC_OL_003_I05	CC_G_10235	CC1G_04763																		0
CC_OL_003_I06	CC_G_10236	CC1G_04762																		0
CC_OL_003_I07	CC_G_10237	CC1G_04756								1										8
CC_OL_003_I08	CC_G_10238	CC1G_04755																		0
CC_OL_003_I09	CC_G_10241	CC1G_04749																		5
CC_OL_003_I10	CC_G_10242	CC1G_04748													YJR117W	STE24	Highly conserved zinc metalloprotease that functions in two steps of a-factor maturation, C-terminal CAAX proteolysis and the first step of N-terminal proteolytic processing; contains multiple transmembrane spans
CC_OL_003_I11	CC_G_10243	CC1G_04745													YDR489W	SLD5	Subunit of the GINS complex (Sld5p, Psf1p, Psf2p, Psf3p), which is localized to DNA replication origins and implicated in assembly of the DNA replication machinery			0
CC_OL_003_I12	CC_G_10244	CC1G_04743									1				YFL037W	TUB2	Beta-tubulin; associates with alpha-tubulin (Tub1p and Tub3p) to form tubulin dimer, which polymerizes to form microtubules			0	beta1 tubulin
CC_OL_003_I13	CC_G_10245	CC1G_04742																		0
CC_OL_003_I14	CC_G_10246	CC1G_04738											1		YGR060W	ERG25	C-4 methyl sterol oxidase, catalyzes the first of three steps required to remove two C-4 methyl groups from an intermediate in ergosterol biosynthesis; mutants accumulate the sterol intermediate 4,4-dimethylzymosterol			0
CC_OL_003_I15	CC_G_10247	CC1G_04737								1										0
CC_OL_003_I16	CC_G_10248	CC1G_04735																		0
CC_OL_003_I17	CC_G_10249	CC1G_04733																		0
CC_OL_003_I18	CC_G_10250	CC1G_04729																		0
CC_OL_003_I19	CC_A_08622	CC1G_04728																		0
CC_OL_003_I20	CC_G_10251	CC1G_04725										1
CC_OL_003_I21	CC_G_10252	CC1G_04724																		0
CC_OL_003_I22	CC_G_10254	CC1G_04722
CC_OL_003_I23	CC_G_10255	CC1G_04713																		0
CC_OL_003_I24	CC_G_10256	CC1G_04711													YEL007W		Putative protein with sequence similarity to S. pombe gti1+ (gluconate transport inducer 1)			0
CC_OL_003_J01	CC_G_10257	CC1G_04709																		0
CC_OL_003_J02	CC_G_10258	CC1G_04706																		0
CC_OL_003_J03	CC_G_10259	CC1G_04702																		0
CC_OL_003_J04	CC_G_10260	CC1G_04701																		3
CC_OL_003_J05	CC_A_08632
CC_OL_003_J06	CC_G_10262	CC1G_04699													YLR303W	MET17	Methionine and cysteine synthase (O-acetyl homoserine-O-acetyl serine sulfhydrylase), required for sulfur amino acid synthesis			3
CC_OL_003_J07	CC_G_10263	CC1G_04700																		0
CC_OL_003_J08	CC_G_10265	CC1G_04703																		0
CC_OL_003_J09	CC_G_10266	CC1G_04704																		0
CC_OL_003_J10	CC_G_10267	CC1G_04705									1
CC_OL_003_J11	CC_G_10268	CC1G_04708													YER006W	NUG1	GTPase that associates with nuclear 60S pre-ribosomes, required for export of 60S ribosomal subunits from the nucleus			0
CC_OL_003_J12	CC_G_10269	CC1G_04712							1		1				YOR008C	SLG1	Sensor-transducer of the stress-activated PKC1-MPK1 kinase pathway involved in maintenance of cell wall integrity; involved in organization of the actin cytoskeleton; secretory pathway Wsc1p is required for the arrest of secretion response			2
CC_OL_003_J13	CC_G_10270	CC1G_04714
CC_OL_003_J14
CC_OL_003_J15
CC_OL_003_J16		CC1G_04720
CC_OL_003_J17	CC_G_10275	CC1G_04721																		0
CC_OL_003_J18	CC_G_10277	CC1G_04727									1
CC_OL_003_J19	CC_G_10278	CC1G_04730									1				YML028W	TSA1	Thioredoxin peroxidase, acts as both a ribosome-associated and free cytoplasmic antioxidant; self-associates to form a high-molecular weight chaperone complex under oxidative stress; deletion results in mutator phenotype			2
CC_OL_003_J20	CC_G_10279	CC1G_04732																		0
CC_OL_003_J21	CC_G_10281	CC1G_04734							1
CC_OL_003_J22	CC_G_10282	CC1G_04736																		0
CC_OL_003_J23	CC_G_10283	CC1G_04740								1					YPR086W	SUA7	Transcription factor TFIIB, a general transcription factor required for transcription initiation and start site selection by RNA polymerase II			6
CC_OL_003_J24	CC_G_10284	CC1G_04741																		0
CC_OL_003_K01	CC_G_10285	CC1G_04744													YER159C	BUR6	Subunit of a heterodimeric NC2 transcription regulator complex with Ncb2p; complex binds to TBP and can repress transcription by preventing preinitiation complex assembly or stimulate activated transcription; homologous to human NC2alpha			4
CC_OL_003_K02	CC_G_10286	CC1G_04746										1								0
CC_OL_003_K03	CC_A_08654
CC_OL_003_K04	CC_G_10288	CC1G_04750													YCL038C	ATG22	Vacuolar integral membrane protein required for efflux of amino acids during autophagic body breakdown in the vacuole; null mutation causes a gradual loss of viability during starvation			0
CC_OL_003_K05	CC_G_10289	CC1G_04751
CC_OL_003_K06	CC_G_10290	CC1G_04752																		0
CC_OL_003_K07	CC_G_10291	CC1G_04753																		7
CC_OL_003_K08	CC_G_10293	CC1G_04758													YLR403W	SFP1	Transcription factor that controls expression of many ribosome biogenesis genes in response to nutrients and stress, regulates G2/M transitions during mitotic cell cycle and DNA-damage response, involved in cell size modulation			0
CC_OL_003_K09	CC_G_10294	CC1G_04759
CC_OL_003_K10	CC_G_10295	CC1G_04760
CC_OL_003_K11	CC_G_10296	CC1G_04761													YGL159W		Putative protein of unknown function; deletion mutant has no detectable phenotype			0
CC_OL_003_K12	CC_G_10298	CC1G_04770																		0
CC_OL_003_K13	CC_G_10299	CC1G_04771																		0
CC_OL_003_K14	CC_G_10300	CC1G_04773																		3
CC_OL_003_K15	CC_G_10301	CC1G_04774
CC_OL_003_K16	CC_G_10302	CC1G_04776																		0
CC_OL_003_K17	CC_G_10303	CC1G_04778																		0
CC_OL_003_K18	CC_G_10304	CC1G_04781													YPR176C	BET2	Beta subunit of Type II geranylgeranyltransferase required for vesicular transport between the endoplasmic reticulum and the Golgi; provides a membrane attachment moiety to Rab-like proteins Ypt1p and Sec4p			0
CC_OL_003_K19	CC_G_10305	CC1G_04782													YBL071W					3
CC_OL_003_K20	CC_G_10306	CC1G_04784																		0
CC_OL_003_K21	CC_G_10307	CC1G_04788
CC_OL_003_K22	CC_G_10309	CC1G_04794													YNL045W		Leucyl aminopeptidase (leukotriene A4 hydrolase) with epoxide hydrolase activity, metalloenzyme containing one zinc atom; role in vivo is not defined; green fluorescent protein (GFP)-fusion protein localizes to the cytoplasm and nucleus			0
CC_OL_003_K23	CC_G_10310	CC1G_04795									1				YNL121C	TOM70	Component (70 kDa) of the TOM (translocase of outer membrane) complex responsible for recognition and initial import steps for all mitochondrially directed proteins; acts as a receptor for incoming precursor proteins			0
CC_OL_003_K24	CC_G_10311	CC1G_04797																		0
CC_OL_003_L01	CC_A_08676	CC1G_04798																		0
CC_OL_003_L02	CC_G_10312	CC1G_04799																		0
CC_OL_003_L03	CC_A_08678	CC1G_04800																		0
CC_OL_003_L04	CC_G_10313	CC1G_04802																		0
CC_OL_003_L05	CC_G_10314	CC1G_04803																		0
CC_OL_003_L06	CC_G_10315	CC1G_04804								1					YGL065C	ALG2	Mannosyltransferase that catalyzes two consecutive steps in the N-linked glycosylation pathway; alg2 mutants exhibit temperature-sensitive growth and abnormal accumulation of the lipid-linked oligosaccharide Man2GlcNAc2-PP-Dol			4	alg2
CC_OL_003_L07	CC_G_10317	CC1G_04809																		0
CC_OL_003_L08	CC_G_10318	CC1G_04810													YDR510W	SMT3	Ubiquitin-like protein of the SUMO family, conjugated to lysine residues of target proteins; regulates chromatid cohesion, chromosome segregation, APC-mediated proteolysis, DNA replication and septin ring dynamics; phosphorylated at Ser2				sumo
CC_OL_003_L09	CC_G_10319	CC1G_04811																		0
CC_OL_003_L10	CC_G_10320	CC1G_04813																		0
CC_OL_003_L11	CC_G_10321	CC1G_04817																		0
CC_OL_003_L12	CC_A_07442	CC1G_13466																		0
CC_OL_003_L13	CC_G_06452	CC1G_12333					1
CC_OL_003_L14	CC_G_06453	CC1G_12331																		0
CC_OL_003_L15	CC_G_06454	CC1G_12329																		0
CC_OL_003_L16	CC_G_06455	CC1G_12330																		0
CC_OL_003_L17	CC_G_06456	CC1G_12332																		0
CC_OL_003_L18	CC_A_05475	CC1G_12335													YER169W	RPH1	JmjC domain-containing histone demethylase which can specifically demethylate H3K36 tri- and dimethyl modification states; transcriptional repressor of PHR1; Rph1p phosphorylation during DNA damage is under control of the MEC1-RAD53 pathway			0
CC_OL_003_L19	CC_G_06458	CC1G_12337																		0	nbs1
CC_OL_003_L20	CC_G_06459	CC1G_12339																		0
CC_OL_003_L21	CC_G_06460	CC1G_12340																		0
CC_OL_003_L22	CC_G_03152	CC1G_12490													YJL212C	OPT1	Proton-coupled oligopeptide transporter of the plasma membrane; also transports glutathione and phytochelatin; member of the OPT family
CC_OL_003_L23	CC_G_03153	CC1G_12489																		0
CC_OL_003_L24	CC_G_03154	CC1G_12488																		0
CC_OL_003_M01	CC_G_03155	CC1G_12486													YGR216C	GPI1	Membrane protein involved in the synthesis of N-acetylglucosaminyl phosphatidylinositol (GlcNAc-PI), the first intermediate in the synthesis of glycosylphosphatidylinositol (GPI) anchors; human and mouse GPI1p are functional homologs			0
CC_OL_003_M02	CC_G_03156	CC1G_12484																		0
CC_OL_003_M03	CC_G_03157	CC1G_12485							1						YDR060W	MAK21	Constituent of 66S pre-ribosomal particles, required for large (60S) ribosomal subunit biogenesis; involved in nuclear export of pre-ribosomes; required for maintenance of dsRNA virus; homolog of human CAATT-binding protein			1
CC_OL_003_M04	CC_G_03158	CC1G_12487																		4
CC_OL_003_M05	CC_G_03159	CC1G_12491													YFR031C	SMC2	Component of the condensin complex; essential SMC chromosomal ATPase family member that forms a complex with Smc4p to form the active ATPase; Smc2p/Smc4p complex binds DNA; required for clustering of tRNA genes at the nucleolus			0
CC_OL_003_M06	CC_G_09648	CC1G_12880
CC_OL_003_M07
CC_OL_003_M08	CC_G_09652
CC_OL_003_M09	CC_A_08133
CC_OL_003_M10	CC_G_09653	CC1G_12873
CC_OL_003_M11	CC_G_09654	CC1G_12883																		0
CC_OL_003_M12	CC_A_01360	CC1G_09057								1		1								0
CC_OL_003_M13	CC_G_01563	CC1G_09063									1
CC_OL_003_M14	CC_G_01565	CC1G_09067																		1
CC_OL_003_M15	CC_G_01571	CC1G_09082													YER178W	PDA1	E1 alpha subunit of the pyruvate dehydrogenase (PDH) complex, catalyzes the direct oxidative decarboxylation of pyruvate to acetyl-CoA; phosphorylated; regulated by glucose
CC_OL_003_M16	CC_G_01574	CC1G_09089
CC_OL_003_M17	CC_G_04169	CC1G_12394																		8
CC_OL_003_M18	CC_G_08793	CC1G_10747
CC_OL_003_M19	CC_G_08802	CC1G_10730									1				YOR293W	RPS10A	Protein component of the small (40S) ribosomal subunit; nearly identical to Rps10Bp and has similarity to rat ribosomal protein S10
CC_OL_003_M20	CC_G_08811	CC1G_10750																		7
CC_OL_003_M21	CC_G_08274	CC1G_11898
CC_OL_003_M22	CC_G_00042	CC1G_07821																		0
CC_OL_003_M23	CC_G_00062																			0
CC_OL_003_M24	CC_G_00063	CC1G_07857													YDL188C	PPH22	Catalytic subunit of protein phosphatase 2A, functionally redundant with Pph21p; methylated at C terminus; forms alternate complexes with several regulatory subunits; involved in signal transduction and regulation of mitosis
CC_OL_003_N01	CC_G_00065	CC1G_07862
CC_OL_003_N02	CC_G_00068	CC1G_07869													YIL034C	CAP2	Beta subunit of the capping protein (CP) heterodimer (Cap1p and Cap2p) which binds to the barbed ends of actin filaments preventing further polymerization; localized predominantly to cortical actin patches			0
CC_OL_003_N03	CC_G_11358	CC1G_11653																		0
CC_OL_003_N04	CC_G_11373	CC1G_11636													YDR012W	RPL4B	Protein component of the large (60S) ribosomal subunit, nearly identical to Rpl4Ap and has similarity to E. coli L4 and rat L4 ribosomal proteins
CC_OL_003_N05	CC_G_04066	CC1G_11187																		0
CC_OL_003_N06	CC_G_12251	CC1G_12370													YMR073C	IRC21	Putative protein of unknown function; proposed to be involved in resistance to carboplatin and cisplatin; shares similarity to a human cytochrome oxidoreductase; null mutant displays increased levels of spontaneous Rad52p foci
CC_OL_003_N07	CC_G_07130	CC1G_13337																		0
CC_OL_003_N08	CC_G_04404	CC1G_13461								1
CC_OL_003_N09	CC_G_08541	CC1G_09208
CC_OL_003_N10	CC_G_08558	CC1G_09241									1
CC_OL_003_N11	CC_G_08559	CC1G_09242								1
CC_OL_003_N12	CC_G_05041	CC1G_05527								1	1									6
CC_OL_003_N13	CC_G_05065	CC1G_05488								1					YML106W	URA5	Major orotate phosphoribosyltransferase (OPRTase) isozyme that catalyzes the fifth enzymatic step in de novo biosynthesis of pyrimidines, converting orotate into orotidine-5'-phosphate; minor OPRTase encoded by URA10			0
CC_OL_003_N14	CC_G_05084	CC1G_05458
CC_OL_003_N15	CC_G_05087	CC1G_05453																		6
CC_OL_003_N16	CC_G_05105	CC1G_05482													YBL039C	URA7	Major CTP synthase isozyme (see also URA8), catalyzes the ATP-dependent transfer of the amide nitrogen from glutamine to UTP, forming CTP, the final step in de novo biosynthesis of pyrimidines; involved in phospholipid biosynthesis			0
CC_OL_003_N17	CC_G_05130	CC1G_05539													YML057W	CMP2	Calcineurin A; one isoform (the other is CNA1) of the catalytic subunit of calcineurin, a Ca++/calmodulin-regulated protein phosphatase which regulates Crz1p (a stress-response transcription factor), the other calcineurin subunit is CNB1
CC_OL_003_N18	CC_G_10794	CC1G_11326													YGL189C	RPS26A	Protein component of the small (40S) ribosomal subunit; nearly identical to Rps26Bp and has similarity to rat S26 ribosomal protein
CC_OL_003_N19	CC_G_03125	CC1G_10893									1
CC_OL_003_N20	CC_G_08984	CC1G_10646													YHR037W	PUT2	Delta-1-pyrroline-5-carboxylate dehydrogenase, nuclear-encoded mitochondrial protein involved in utilization of proline as sole nitrogen source; deficiency of the human homolog causes HPII, an autosomal recessive inborn error of metabolism
CC_OL_003_N21	CC_G_10767	CC1G_08825																		0
CC_OL_003_N22	CC_G_08584	CC1G_12427									1				YOR369C	RPS12	Protein component of the small (40S) ribosomal subunit; has similarity to rat ribosomal protein S12			1
CC_OL_003_N23	CC_G_08589	CC1G_12431													YLR330W	CHS5	Component of the exomer complex, which also contains Csh6p, Bch1p, Bch2p, and Bud7p and is involved in export of selected proteins, such as chitin synthase Chs3p, from the Golgi to the plasma membrane			5
CC_OL_003_N24	CC_G_05312	CC1G_07916
CC_OL_003_O01	CC_G_05313	CC1G_07918
CC_OL_003_O02	CC_G_02806	CC1G_12136																		0
CC_OL_003_O03	CC_G_08453	CC1G_08232													YFL039C	ACT1	Actin, structural protein involved in cell polarization, endocytosis, and other cytoskeletal functions			0	act1
CC_OL_003_O04	CC_G_08463	CC1G_08211													YOL120C	RPL18A	Protein component of the large (60S) ribosomal subunit, identical to Rpl18Bp and has similarity to rat L18 ribosomal protein; intron of RPL18A pre-mRNA forms stem-loop structures that are a target for Rnt1p cleavage leading to degradation
CC_OL_003_O05	CC_G_08467	CC1G_08200													YDR221W	GTB1	Glucosidase II beta subunit, forms a complex with alpha subunit Rot2p, involved in removal of two glucose residues from N-linked glycans during glycoprotein biogenesis in the ER			0
CC_OL_003_O06	CC_G_08845	CC1G_11096																		0
CC_OL_003_O07	CC_G_08847	CC1G_11099													YAR014C	BUD14	Protein involved in bud-site selection, Bud14p-Glc7p complex functions as a cortical regulator of dynein; diploid mutants display a random budding pattern instead of the wild-type bipolar pattern			0
CC_OL_003_O08	CC_G_11432	CC1G_06685
CC_OL_003_O09	CC_G_11467	CC1G_06646													YIL142W	CCT2	Subunit beta of the cytosolic chaperonin Cct ring complex, related to Tcp1p, required for the assembly of actin and tubulins in vivo			0
CC_OL_003_O10	CC_G_11472	CC1G_06653													YKL060C	FBA1	Fructose 1,6-bisphosphate aldolase, required for glycolysis and gluconeogenesis; catalyzes conversion of fructose 1,6 bisphosphate to glyceraldehyde-3-P and dihydroxyacetone-P; locates to mitochondrial outer surface upon oxidative stress
CC_OL_003_O11	CC_G_11473	CC1G_06656													YKL085W	MDH1	Mitochondrial malate dehydrogenase, catalyzes interconversion of malate and oxaloacetate; involved in the tricarboxylic acid (TCA) cycle; phosphorylated
CC_OL_003_O12	CC_G_11496	CC1G_06703
CC_OL_003_O13	CC_G_04471	CC1G_08888									1				YBL015W	ACH1	Acetyl-coA hydrolase, primarily localized to mitochondria; phosphorylated; required for acetate utilization and for diploid pseudohyphal growth			6
CC_OL_003_O14	CC_G_01219	CC1G_13388									1
CC_OL_003_O15	CC_G_06487	CC1G_10601									1
CC_OL_003_O16	CC_G_06501	CC1G_10622																		0
CC_OL_003_O17	CC_G_03562	CC1G_11368													YOR312C	RPL20B	Protein component of the large (60S) ribosomal subunit, nearly identical to Rpl20Ap and has similarity to rat L18a ribosomal protein			3
CC_OL_003_O18	CC_G_03578	CC1G_11355																		0
CC_OL_003_O19	CC_G_03584	CC1G_11364								1		1
CC_OL_003_O20	CC_G_10685	CC1G_09588																		0
CC_OL_003_O21	CC_G_10727	CC1G_09582													YDL216C	RRI1	Catalytic subunit of the COP9 signalosome (CSN) complex that acts as an isopeptidase in cleaving the ubiquitin-like protein Nedd8 from SCF ubiquitin ligases; metalloendopeptidase involved in the adaptation to pheromone signaling
CC_OL_003_O22	CC_G_02893	CC1G_09659
CC_OL_003_O23	CC_G_02910	CC1G_09654																		0
CC_OL_003_O24	CC_G_02915	CC1G_09658																		0
CC_OL_003_P01	CC_G_03236	CC1G_09189
CC_OL_003_P02	CC_G_03245	CC1G_09176													YEL002C	WBP1	Beta subunit of the oligosaccharyl transferase (OST) glycoprotein complex; required for N-linked glycosylation of proteins in the endoplasmic reticulum
CC_OL_003_P03	CC_G_03271
CC_OL_003_P04	CC_G_11704	CC1G_06149
CC_OL_003_P05	CC_G_11747	CC1G_06057								1					YCR044C	PER1	Protein of the endoplasmic reticulum, required for GPI-phospholipase A2 activity that remodels the GPI anchor as a prerequisite for association of GPI-anchored proteins with lipid rafts; functionally complemented by human ortholog PERLD1			0
CC_OL_003_P06	CC_G_11730	CC1G_06090													YLR249W	YEF3	Translational elongation factor 3, stimulates the binding of aminoacyl-tRNA (AA-tRNA) to ribosomes by releasing EF-1 alpha from the ribosomal complex; contains two ABC cassettes; binds and hydrolyses ATP
CC_OL_003_P07	CC_G_11797	CC1G_06151
CC_OL_003_P08	CC_G_04142	CC1G_12508																		3
CC_OL_003_P09	CC_G_07017	CC1G_10412													YGR054W		Eukaryotic initiation factor (eIF) 2A; associates specifically with both 40S subunits and 80 S ribosomes, and interacts genetically with both eIF5b and eIF4E; homologous to mammalian eIF2A			0
CC_OL_003_P10	CC_G_07036	CC1G_10394								1										0
CC_OL_003_P11	CC_G_07037	CC1G_10395
CC_OL_003_P12	CC_G_07040	CC1G_10398							1											8
CC_OL_003_P13	CC_G_03943	CC1G_02650													YLR164W		Mitochondrial inner membrane of unknown function; similar to Tim18p and Sdh4p; expression induced by nitrogen limitation in a GLN3, GAT1-dependent manner
CC_OL_003_P14	CC_G_03992	CC1G_02572													YAL012W	CYS3	Cystathionine gamma-lyase, catalyzes one of the two reactions involved in the transsulfuration pathway that yields cysteine from homocysteine with the intermediary formation of cystathionine			8
CC_OL_003_P15	CC_G_00148	CC1G_10970								1					YDL119C		Putative mitochondrial transport protein; GFP-fusion protein is induced in response to the DNA-damaging agent MMS; the authentic, non-tagged protein is detected in purified mitochondria			1
CC_OL_003_P16	CC_G_03297	CC1G_05313
CC_OL_003_P17	CC_G_03306	CC1G_05297																		6
CC_OL_003_P18	CC_G_03335	CC1G_05237													YBL038W	MRPL16	Mitochondrial ribosomal protein of the large subunit			4
CC_OL_003_P19	CC_G_03355	CC1G_05219
CC_OL_003_P20	CC_G_03356	CC1G_05222
CC_OL_003_P21	CC_G_03366	CC1G_05243
CC_OL_003_P22	CC_G_03377	CC1G_05262													YGR284C	ERV29	Protein localized to COPII-coated vesicles, involved in vesicle formation and incorporation of specific secretory cargo			0
CC_OL_003_P23	CC_G_03397	CC1G_05303									1				YOL078W	AVO1	Component of a membrane-bound complex containing the Tor2p kinase and other proteins, which may have a role in regulation of cell growth
CC_OL_003_P24	CC_G_03401	CC1G_05310																		6
CC_OL_004_A01	CC_G_01595	CC1G_07270																		0
CC_OL_004_A02	CC_G_01630	CC1G_07214				1				1
CC_OL_004_A03	CC_G_06998	CC1G_09480
CC_OL_004_A04	blank
CC_OL_004_A05	CC_G_07005	CC1G_09490																		3
CC_OL_004_A06	CC_G_10186
CC_OL_004_A07		CC1G_11271													YPL152W	RRD2	Activator of the phosphotyrosyl phosphatase activity of PP2A,peptidyl-prolyl cis/trans-isomerase; regulates G1 phase progression, the osmoresponse, microtubule dynamics; subunit of the Tap42p-Pph21p-Rrd2p complex			0
CC_OL_004_A08	CC_G_10195	CC1G_11265								1										0
CC_OL_004_A09	CC_G_11176	CC1G_10440									1				YER003C	PMI40	Mannose-6-phosphate isomerase, catalyzes the interconversion of fructose-6-P and mannose-6-P; required for early steps in protein mannosylation			6
CC_OL_004_A10	CC_G_06932	CC1G_10353																		8
CC_OL_004_A11	CC_G_10416	CC1G_13484
CC_OL_004_A12	CC_G_06097	CC1G_03089
CC_OL_004_A13	CC_G_06126	CC1G_03149							1											3
CC_OL_004_A14	CC_G_06128	CC1G_03154																		0
CC_OL_004_A15	CC_A_04012	CC1G_04926																		0
CC_OL_004_A16	CC_G_04733	CC1G_04843
CC_OL_004_A17	CC_G_04771	CC1G_04927																		9
CC_OL_004_A18		CC1G_08314																			coH28/29/30/31/32/34
CC_OL_004_A19	CC_G_08241	CC1G_08257																		0
CC_OL_004_A20	CC_G_08247	CC1G_08270																		0
CC_OL_004_A21	CC_G_08258	CC1G_08291								1					YKR059W	TIF1	Translation initiation factor eIF4A, identical to Tif2p; DEA(D/H)-box RNA helicase that couples ATPase activity to RNA binding and unwinding; forms a dumbbell structure of two compact domains connected by a linker; interacts with eIF4G
CC_OL_004_A22	CC_G_05728	CC1G_10178																		0
CC_OL_004_A23	CC_G_09704	CC1G_11380									1				YGL011C	SCL1	Alpha 1 subunit of the 20S proteasome involved in the degradation of ubiquitinated substrates; 20S proteasome is the core complex of the 26S proteasome; essential for growth; detected in the mitochondria
CC_OL_004_A24	CC_G_09708	CC1G_11377								1					YMR079W	SEC14	Phosphatidylinositol/phosphatidylcholine transfer protein involved in coordinate regulation of PtdIns and PtdCho metabolism, products of which are regulators in Golgi to plasma membrane transport; functionally homologous to mammalian PITPs			6
CC_OL_004_B01	CC_G_09718	CC1G_11396													YOR310C	NOP58	Protein involved in pre-rRNA processing, 18S rRNA synthesis, and snoRNA synthesis; component of the small subunit processome complex, which is required for processing of pre-18S rRNA			3
CC_OL_004_B02	CC_G_03224	CC1G_09955													YIL018W	RPL2B	Protein component of the large (60S) ribosomal subunit, identical to Rpl2Ap and has similarity to E. coli L2 and rat L8 ribosomal proteins; expression is upregulated at low temperatures
CC_OL_004_B03	CC_A_02971	CC1G_11842								1					YDL081C	RPP1A	Ribosomal stalk protein P1 alpha, involved in the interaction between translational elongation factors and the ribosome; accumulation of P1 in the cytoplasm is regulated by phosphorylation and interaction with the P2 stalk component			0
CC_OL_004_B04	CC_G_03444
CC_OL_004_B05	CC_G_11081	CC1G_12104
CC_OL_004_B06	CC_G_11089	CC1G_12110
CC_OL_004_B07	CC_G_05487																			6
CC_OL_004_B08	CC_G_00013	CC1G_07859																		0
CC_OL_004_B09	CC_G_00014	CC1G_07858									1									0
CC_OL_004_B10	CC_G_00023	CC1G_07840																		0
CC_OL_004_B11	CC_G_00061	CC1G_07855																		0
CC_OL_004_B12	CC_G_00075	CC1G_07876																		0
CC_OL_004_B13	CC_A_00211	CC1G_01077													YNL104C	LEU4	Alpha-isopropylmalate synthase (2-isopropylmalate synthase); the main isozyme responsible for the first step in the leucine biosynthesis pathway
CC_OL_004_B14	CC_G_00926	CC1G_06427																		0
CC_OL_004_B15	CC_G_01279	CC1G_08933																		0
CC_OL_004_B16	CC_G_01574	CC1G_09089
CC_OL_004_B17	CC_G_01886	CC1G_07745																		0
CC_OL_004_B18	CC_G_01887	CC1G_07744										1			YIL010W	DOT5	Nuclear thiol peroxidase which functions as an alkyl-hydroperoxide reductase during post-diauxic growth			0
CC_OL_004_B19	CC_G_02003	CC1G_01334																		7
CC_OL_004_B20	CC_G_02510	CC1G_00255																		0
CC_OL_004_B21	CC_G_03282	CC1G_09179									1									0
CC_OL_004_B22	CC_G_03317	CC1G_05275													YLR450W	HMG2	One of two isozymes of HMG-CoA reductase that convert HMG-CoA to mevalonate, a rate-limiting step in sterol biosynthesis; overproduction induces assembly of peripheral ER membrane arrays and short nuclear-associated membrane stacks			0
CC_OL_004_B23	CC_G_03700	CC1G_03536																		0
CC_OL_004_B24	CC_G_04376	CC1G_05598									1
CC_OL_004_C01	CC_G_04846	CC1G_05664													YBR218C	PYC2	Pyruvate carboxylase isoform, cytoplasmic enzyme that converts pyruvate to oxaloacetate; highly similar to isoform Pyc1p but differentially regulated; mutations in the human homolog are associated with lactic acidosis
CC_OL_004_C02	CC_G_06410	CC1G_03744									1									0
CC_OL_004_C03	CC_G_06712	CC1G_05834																		0
CC_OL_004_C04	CC_G_07440	CC1G_10870																		0
CC_OL_004_C05	CC_G_09200	CC1G_07030													YPR065W	ROX1	Heme-dependent repressor of hypoxic genes; contains an HMG domain that is responsible for DNA bending activity			3
CC_OL_004_C06	CC_G_09217	CC1G_06994																		0
CC_OL_004_C07	CC_G_09217	CC1G_06994
CC_OL_004_C08	CC_G_09312	CC1G_07391									1									3
CC_OL_004_C09	CC_G_09432	CC1G_07617																		0
CC_OL_004_C10	CC_G_09720	CC1G_11400													YKL032C	IXR1	Protein that binds DNA containing intrastrand cross-links formed by cisplatin, contains two HMG (high mobility group box) domains, which confer the ability to bend cisplatin-modified DNA; mediates aerobic transcriptional repression of COX5b
CC_OL_004_C11	CC_G_10083	CC1G_13078																		2
CC_OL_004_C12	CC_G_10586	CC1G_07470																		0
CC_OL_004_C13	CC_G_10587	CC1G_07471																		0
CC_OL_004_C14	CC_A_09230	CC1G_04121									1									3
CC_OL_004_C15	CC_G_11123	CC1G_08660								1					YGR285C	ZUO1	Cytosolic ribosome-associated chaperone that acts, together with Ssz1p and the Ssb proteins, as a chaperone for nascent polypeptide chains; contains a DnaJ domain and functions as a J-protein partner for Ssb1p and Ssb2p			4
CC_OL_004_C16	CC_G_11369	CC1G_11633																		0
CC_OL_004_C17	CC_G_11899	CC1G_08141
CC_OL_004_C18	CC_G_12073	CC1G_00827									1				YML126C	ERG13	3-hydroxy-3-methylglutaryl-CoA (HMG-CoA) synthase, catalyzes the formation of HMG-CoA from acetyl-CoA and acetoacetyl-CoA; involved in the second step in mevalonate biosynthesis			2
CC_OL_004_C19	CC_G_03086	CC1G_11980																		0
CC_OL_004_C20	CC_G_00921	CC1G_06438													YDL182W	LYS20	Homocitrate synthase isozyme, catalyzes the condensation of acetyl-CoA and alpha-ketoglutarate to form homocitrate, which is the first step in the lysine biosynthesis pathway; highly similar to the other isozyme, Lys21p			3
CC_OL_004_C21	CC_G_09315	CC1G_07395																		2
CC_OL_004_C22	CC_G_07594	CC1G_02136																		0
CC_OL_004_C23																				0
CC_OL_004_C24																					rcb2_B43
CC_OL_004_D01	CC_G_07584	CC1G_02151									1
CC_OL_004_D02	CC_G_03011	CC1G_02255																		0
CC_OL_004_D03	CC_G_08344	CC1G_02452																		0
CC_OL_004_D04	CC_G_07583	CC1G_02153																		0
CC_OL_004_D05	CC_G_00440	CC1G_01828						1												3	d1-1
CC_OL_004_D06	CC_G_00476	CC1G_01752																		3
CC_OL_004_D07																				3	b1
CC_OL_004_D08	CC_A_00507	CC1G_01834																		0
CC_OL_004_D09	CC_G_03387	CC1G_05280													YMR076C	PDS5	Protein required for establishment and maintenance of sister chromatid condensation and cohesion, colocalizes with cohesin on chromosomes in an interdependent manner, may function as a protein-protein interaction scaffold			0
CC_OL_004_D10	CC_G_04589	CC1G_02791													YPL022W	RAD1	Single-stranded DNA endonuclease (with Rad10p), cleaves single-stranded DNA during nucleotide excision repair and double-strand break repair; subunit of Nucleotide Excision Repair Factor 1 (NEF1); homolog of human XPF protein			0
CC_OL_004_D11	CC_G_05692	CC1G_02962
CC_OL_004_D12	CC_G_06884	CC1G_01962													YDR451C	YHP1	One of two homeobox transcriptional repressors (see also Yox1p), that bind to Mcm1p and to early cell cycle box (ECB) elements of cell cycle regulated genes, thereby restricting ECB-mediated transcription to the M/G1 interval			7
CC_OL_004_D13	CC_A_05852
CC_OL_004_D14	CC_G_07782	CC1G_04998																		4
CC_OL_004_D15	CC_G_08609	CC1G_11243
CC_OL_004_D16	CC_G_09024	CC1G_10926																		0
CC_OL_004_D17	CC_G_09449	CC1G_07663													YNL272C	SEC2	Guanyl-nucleotide exchange factor for the small G-protein Sec4p, located on cytoplasmic vesicles; essential for post-Golgi vesicle transport			8
CC_OL_004_D18	CC_G_10479	CC1G_06918													YIL026C	IRR1	Subunit of the cohesin complex, which is required for sister chromatid cohesion during mitosis and meiosis and interacts with centromeres and chromosome arms, essential for viability			3
CC_OL_004_D19	CC_G_12259	CC1G_12380																		0
CC_OL_004_D20																				0	pab1
CC_OL_004_D21
CC_OL_004_D22	CC_G_00448	CC1G_01808																		5	lim15/dmc1
CC_OL_004_D23	CC_G_01350	CC1G_00690																		0
CC_OL_004_D24	CC_A_01179	CC1G_00631								1		1			YBR023C	CHS3	Chitin synthase III, catalyzes the transfer of N-acetylglucosamine (GlcNAc) to chitin; required for synthesis of the majority of cell wall chitin, the chitin ring during bud emergence, and spore wall chitosan			9	chs1
CC_OL_004_E01	CC_G_01821	CC1G_11144													YOL080C	REX4	Putative RNA exonuclease possibly involved in pre-rRNA processing and ribosome assembly			1	mipD
CC_OL_004_E02	CC_G_05598	CC1G_03010		1				1		1					YNL250W	RAD50	Subunit of MRX complex, with Mre11p and Xrs2p, involved in processing double-strand DNA breaks in vegetative cells, initiation of meiotic DSBs, telomere maintenance, and nonhomologous end joining			5	rad50
CC_OL_004_E03	CC_G_05763	CC1G_09263								1											lcc6
CC_OL_004_E04																				9	acs1
CC_OL_004_E05																				0	lcc1
CC_OL_004_E06	CC_G_07145	CC1G_09609
CC_OL_004_E07	CC_G_08311	CC1G_02533								1										7
CC_OL_004_E08																				0
CC_OL_004_E09	CC_G_09699	CC1G_11388																		4	arf1
CC_OL_004_E10	CC_G_09700	CC1G_11387							1												cfs1
CC_OL_004_E11										1										0	sdhC
CC_OL_004_E12	CC_G_11245	CC1G_04470													YEL060C	PRB1	Vacuolar proteinase B (yscB), a serine protease of the subtilisin family; involved in protein degradation in the vacuole and required for full protein degradation during sporulation			0	sub
CC_OL_004_E13	CC_G_11648	CC1G_05965										1								0	lcc8
CC_OL_004_E14	CC_G_12491	CC1G_10319													YMR224C	MRE11	Subunit of a complex with Rad50p and Xrs2p (MRX complex) that functions in repair of DNA double-strand breaks and in telomere stability, exhibits nuclease activity that appears to be required for MRX function; widely conserved			3	mre11
CC_OL_004_E15		CC1G_00662													YHR186C	KOG1	Subunit of TORC1, a rapamycin-sensitive complex involved in growth control that contains Tor1p or Tor2p, Lst8p and Tco89p; contains four HEAT repeats and seven WD-40 repeats; may act as a scaffold protein to couple TOR and its effectors			0	nip1
CC_OL_004_E16																				5	rad9
CC_OL_004_E17	CC_G_01153	CC1G_03320													YHL022C	SPO11	Meiosis-specific protein that initiates meiotic recombination by catalyzing the formation of double-strand breaks in DNA via a transesterification reaction; required for homologous chromosome pairing and synaptonemal complex formation			3	spo11
CC_OL_004_E18		CC1G_04420																		3	num1
CC_OL_004_E19	CC_G_02865	CC1G_10826																			caf1
CC_OL_004_E20		CC1G_12670													YOR236W	DFR1	Dihydrofolate reductase, part of the dTTP biosynthetic pathway, involved in folate metabolism, possibly required for mitochondrial function			0	dhfr
CC_OL_004_E21	CC_A_04874	CC1G_10193																		0	eln3
CC_OL_004_E22																				4	topII
CC_OL_004_E23	CC_G_06536	CC1G_09782										1								8	eln2
CC_OL_004_E24	CC_G_07512	CC1G_10537													YER081W	SER3	3-phosphoglycerate dehydrogenase, catalyzes the first step in serine and glycine biosynthesis; isozyme of Ser33p			0
CC_OL_004_F01		CC1G_02104																		0	cip1
CC_OL_004_F02
CC_OL_004_F03																					mfs1.2
CC_OL_004_F04										1										0	coH2
CC_OL_004_F05	CC_A_06569	CC1G_05003									1									3	cglI
CC_OL_004_F06																					acu7
CC_OL_004_F07	CC_G_09313	CC1G_07392																		4	pcc1
CC_OL_004_F08											1									0	ich1
CC_OL_004_F09	CC_G_08961	CC1G_12472								1										3	clp1
CC_OL_004_F10	CC_G_11658	CC1G_05972																			lcc4
CC_OL_004_F11										1											hyt1
CC_OL_004_F12																				0	bad42
CC_OL_004_F13	CC_G_06812	CC1G_01942													YPL120W	VPS30	Subunit of phosphatidylinositol (PtdIns) 3-kinase complexes I and II; Complex I is essential in autophagy and Complex II is required for vacuolar protein sorting; ortholog of the higher eukaryotic gene Beclin 1			0
CC_OL_004_F14	CC_G_09974	CC1G_05145													YLR212C	TUB4	Gamma-tubulin, involved in nucleating microtubules from both the cytoplasmic and nuclear faces of the spindle pole body			3	gamma tubulin
CC_OL_004_F15																					rad9
CC_OL_004_F16	CC_G_00614	CC1G_07129																			msh5
CC_OL_004_F17	CC_G_09983	CC1G_05127																		7	rad21.1
CC_OL_004_F18	CC_G_06361	CC1G_03652																		4	rad21.2
CC_OL_004_F19		CC1G_02138																			phb3.3_B43
CC_OL_004_F20	CC_G_09726	CC1G_07736											1		YML032C	RAD52	Protein that stimulates strand exchange by facilitating Rad51p binding to single-stranded DNA; anneals complementary single-stranded DNA; involved in the repair of double-strand breaks in DNA during vegetative growth and meiosis			0
CC_OL_004_F21	CC_G_05360	CC1G_04275							1						YLR045C	STU2	Microtubule-associated protein (MAP) of the XMAP215/Dis1 family; regulates microtubule dynamics during spindle orientation and metaphase chromosome alignment; interacts with spindle pole body component Spc72p			4
CC_OL_004_F22	CC_G_05379	CC1G_04228													YBL063W	KIP1	Kinesin-related motor protein required for mitotic spindle assembly and chromosome segregation; functionally redundant with Cin8p			0
CC_OL_004_F23	CC_G_09977	CC1G_05140																		0
CC_OL_004_F24	CC_A_08047	CC1G_03801													YIL046W	MET30	F-box protein containing five copies of the WD40 motif, controls cell cycle function, sulfur metabolism, and methionine biosynthesis as part of the ubiquitin ligase complex; interacts with and regulates Met4p, localizes within the nucleus			0
CC_OL_004_G01	CC_G_09585	CC1G_03820													YBL078C	ATG8	Component of autophagosomes and Cvt vesicles; undergoes conjugation to phosphatidylethanolamine (PE); Atg8p-PE is anchored to membranes, is involved in phagophore expansion, and may mediate membrane fusion during autophagosome formation			0
CC_OL_004_G02	CC_G_00721	CC1G_11476													YPL150W		Putative protein kinase of unknown cellular role			0
CC_OL_004_G03	CC_G_08766	CC1G_06497							1						YHR172W	SPC97	Component of the microtubule-nucleating Tub4p (gamma-tubulin) complex; interacts with Spc110p at the spindle pole body (SPB) inner plaque and with Spc72p at the SPB outer plaque			0
CC_OL_004_G04	CC_G_01190	CC1G_07999					1								YLR197W	NOP56	Essential evolutionarily-conserved nucleolar protein component of the box C/D snoRNP complexes that direct 2'-O-methylation of pre-rRNA during its maturation; overexpression causes spindle orientation defects			4
CC_OL_004_G05	CC_G_07851	CC1G_07078													YGR188C	BUB1	Protein kinase that forms a complex with Mad1p and Bub3p that is crucial in the checkpoint mechanism required to prevent cell cycle progression into anaphase in the presence of spindle damage, associates with centromere DNA via Skp1p			0
CC_OL_004_G06	CC_G_02555	CC1G_00343													YNL126W	SPC98	Component of the microtubule-nucleating Tub4p (gamma-tubulin) complex; interacts with Spc110p at the spindle pole body (SPB) inner plaque and with Spc72p at the SPB outer plaque			0
CC_OL_004_G07	CC_A_05375	CC1G_03629													YLR175W	CBF5	Pseudouridine synthase catalytic subunit of box H/ACA small nucleolar ribonucleoprotein particles (snoRNPs), acts on both large and small rRNAs and on snRNA U2			1
CC_OL_004_G08	CC_G_06071	CC1G_03036								1					YER016W	BIM1	Microtubule-binding protein that together with Kar9p makes up the cortical microtubule capture site and delays the exit from mitosis when the spindle is oriented abnormally			0
CC_OL_004_G09	CC_G_09294	CC1G_07350													YMR055C	BUB2	Mitotic exit network regulator, forms GTPase-activating Bfa1p-Bub2p complex that binds Tem1p and spindle pole bodies, blocks cell cycle progression before anaphase in response to spindle and kinetochore damage			0
CC_OL_004_G10	CC_A_08495	CC1G_09388																		0
CC_OL_004_G11	CC_G_08443	CC1G_02554													YEL040W	UTR2	Cell wall protein that functions in the transfer of chitin to beta(1-6)glucan; putative chitin transglycosidase; glycosylphosphatidylinositol (GPI)-anchored protein localized to the bud neck; has a role in cell wall maintenance			1
CC_OL_004_G12	CC_G_05401	CC1G_04183									1				YDL143W	CCT4	Subunit of the cytosolic chaperonin Cct ring complex, related to Tcp1p, required for the assembly of actin and tubulins in vivo			4
CC_OL_004_G13	CC_A_08386	CC1G_05204													YGR245C	SDA1	Highly conserved nuclear protein required for actin cytoskeleton organization and passage through Start, plays a critical role in G1 events, binds Nap1p, also involved in 60S ribosome biogenesis			4
CC_OL_004_G14	CC_G_10015	CC1G_05083													YGR080W	TWF1	Twinfilin, highly conserved actin monomer-sequestering protein involved in regulation of the cortical actin cytoskeleton, composed of two cofilin-like regions, localizes actin monomers to sites of rapid filament assembly			3
CC_OL_004_G15	CC_A_08047	CC1G_03801													YIL046W	MET30	F-box protein containing five copies of the WD40 motif, controls cell cycle function, sulfur metabolism, and methionine biosynthesis as part of the ubiquitin ligase complex; interacts with and regulates Met4p, localizes within the nucleus
CC_OL_004_G16	CC_G_08654	CC1G_12191													YNL059C	ARP5	Nuclear actin-related protein involved in chromatin remodeling, component of chromatin-remodeling enzyme complexes			0
CC_OL_004_G17	CC_G_08654	CC1G_12191													YNL059C	ARP5	Nuclear actin-related protein involved in chromatin remodeling, component of chromatin-remodeling enzyme complexes
CC_OL_004_G18	CC_G_07580	CC1G_02156													YGR078C	PAC10	Part of the heteromeric co-chaperone GimC/prefoldin complex, which promotes efficient protein folding			4
CC_OL_004_G19	CC_G_08737	CC1G_06473													YOR181W	LAS17	Actin assembly factor, activates the Arp2/3 protein complex that nucleates branched actin filaments; localizes with the Arp2/3 complex to actin patches; homolog of the human Wiskott-Aldrich syndrome protein (WASP)			0
CC_OL_004_G20	CC_G_08723	CC1G_06498
CC_OL_004_G21	CC_G_01186	CC1G_08002													YLR085C	ARP6	Actin-related protein that binds nucleosomes; a component of the SWR1 complex, which exchanges histone variant H2AZ (Htz1p) for chromatin-bound histone H2A			4
CC_OL_004_G22	CC_G_04232	CC1G_03395													YLL050C	COF1	Cofilin, promotes actin filament depolarization in a pH-dependent manner; binds both actin monomers and filaments and severs filaments; thought to be regulated by phosphorylation at SER4; ubiquitous and essential in eukaryotes
CC_OL_004_G23	CC_A_10266	CC1G_11699								1										0
CC_OL_004_G24	CC_G_09014	CC1G_10952																		0
CC_OL_004_H01	CC_G_02429	CC1G_00100																		1
CC_OL_004_H02	CC_G_02472	CC1G_00182													YDR486C	VPS60	Cytoplasmic and vacuolar membrane protein involved in late endosome to vacuole transport; required for normal filament maturation during pseudohyphal growth; may function in targeting cargo proteins for degradation; interacts with Vta1p			0
CC_OL_004_H03	CC_G_02546	CC1G_00329													YMR093W	UTP15	Nucleolar protein, component of the small subunit (SSU) processome containing the U3 snoRNA that is involved in processing of pre-18S rRNA			3
CC_OL_004_H04	CC_G_02527	CC1G_00289													YPL242C	IQG1	Essential protein required for determination of budding pattern, promotes localization of axial markers Bud4p and Cdc12p and functionally interacts with Sec3p, localizes to the contractile ring during anaphase, member of the IQGAP family			3
CC_OL_004_H05	CC_G_08815	CC1G_10757													YCR011C	ADP1	Putative ATP-dependent permease of the ABC transporter family of proteins			0
CC_OL_004_H06	CC_G_07952	CC1G_06718																		1
CC_OL_004_H07	CC_G_00511	CC1G_01715													YLR200W	YKE2	Subunit of the heterohexameric Gim/prefoldin protein complex involved in the folding of alpha-tubulin, beta-tubulin, and actin			3
CC_OL_004_H08	CC_A_08047	CC1G_03801													YIL046W	MET30	F-box protein containing five copies of the WD40 motif, controls cell cycle function, sulfur metabolism, and methionine biosynthesis as part of the ubiquitin ligase complex; interacts with and regulates Met4p, localizes within the nucleus
CC_OL_004_H09	CC_G_06737	CC1G_13048																		0
CC_OL_004_H10	CC_G_06738	CC1G_13050
CC_OL_004_H11	CC_G_00155	CC1G_10983													YDR129C	SAC6	Fimbrin, actin-bundling protein; cooperates with Scp1p (calponin/transgelin) in the organization and maintenance of the actin cytoskeleton
CC_OL_004_H12	CC_G_06113	CC1G_03115																		0
CC_OL_004_H13	CC_G_06032	CC1G_03127																		0
CC_OL_004_H14	CC_G_06890	CC1G_01975													YJL080C	SCP160	Essential RNA-binding G protein effector of mating response pathway, mainly associated with nuclear envelope and ER, interacts in mRNA-dependent manner with translating ribosomes via multiple KH domains, similar to vertebrate vigilins			0
CC_OL_004_H15		CC1G_02289
CC_OL_004_H16	CC_G_06824	CC1G_01914													YKL013C	ARC19	Subunit of the ARP2/3 complex, which is required for the motility and integrity of cortical actin patches
CC_OL_004_H17	CC_G_06859	CC1G_01912																		5
CC_OL_004_H18	CC_A_02410	CC1G_06855													YLR083C	EMP70	Protein with a role in cellular adhesion and filamentous growth; similar to Tmn2p and Tmn3p; member of Transmembrane Nine family of proteins with 9 transmembrane segments; 24kDa cleavage product found in endosome-enriched membrane fractions			0
CC_OL_004_H19	CC_G_09059	CC1G_04040													YLR429W	CRN1	Coronin, cortical actin cytoskeletal component that associates with the Arp2p/Arp3p complex to regulate its activity; plays a role in regulation of actin patch assembly			0
CC_OL_004_H20	CC_G_01230	CC1G_12158																		0
CC_OL_004_H21	CC_G_12190	CC1G_00895													YOR141C	ARP8	Nuclear actin-related protein involved in chromatin remodeling, component of chromatin-remodeling enzyme complexes			3
CC_OL_004_H22	CC_G_12029	CC1G_00933							1						YLR319C	BUD6	Actin- and formin-interacting protein, involved in actin cable nucleation and polarized cell growth; isolated as bipolar budding mutant; potential Cdc28p substrate			0
CC_OL_004_H23	CC_G_12093	CC1G_00792													YOR239W	ABP140	Nonessential protein that binds actin filaments and localizes to actin patches and cables, has similarity to S-adenosylmethionine (AdoMet)-dependent methyltransferases			4
CC_OL_004_H24	CC_G_12232	CC1G_00968													YOR123C	LEO1	Component of the Paf1 complex, which associates with RNA polymerase II and is involved in histone methylation; plays a role in regulating Ty1 transposition			4
CC_OL_004_I01	CC_G_12064	CC1G_00848													YOL071W	EMI5	Non-essential protein of unknown function required for transcriptional induction of the early meiotic-specific transcription factor IME1, also required for sporulation; null mutant excretes excess acetic acid
CC_OL_004_I02	CC_G_07344	CC1G_09333																		5
CC_OL_004_I03	CC_G_00545	CC1G_01780																		3
CC_OL_004_I04		CC1G_00168
CC_OL_004_I05	CC_G_09897	CC1G_09015													YOR259C	RPT4	One of six ATPases of the 19S regulatory particle of the 26S proteasome involved in the degradation of ubiquitinated substrates; required for spindle pole body duplication; localized mainly to the nucleus throughout the cell cycle			4
CC_OL_004_I06	CC_G_08968	CC1G_12481																		0
CC_OL_004_I07	CC_G_02544	CC1G_00318
CC_OL_004_I08	CC_G_06872	CC1G_01933																		4
CC_OL_004_I09	CC_G_07987	CC1G_06780																		0
CC_OL_004_I10	CC_G_10079	CC1G_05207								1										0
CC_OL_004_I11	CC_G_07956	CC1G_06716								1										0
CC_OL_004_I12	CC_G_08651	CC1G_12185													YJL154C	VPS35	Endosomal subunit of membrane-associated retromer complex required for retrograde transport; receptor that recognizes retrieval signals on cargo proteins, forms subcomplex with Vps26p and Vps29p that selects cargo proteins for retrieval			0
CC_OL_004_I13	CC_G_00486	CC1G_01733													YIL067C		Uncharacterized protein of unknown function			0
CC_OL_004_I14	CC_G_00518	CC1G_01728
CC_OL_004_I15	CC_G_00708	CC1G_12850																		0
CC_OL_004_I16	CC_G_00830	CC1G_07520																		0
CC_OL_004_I17	CC_G_00961	CC1G_06361																		8
CC_OL_004_I18	CC_G_01047	CC1G_03267																		0
CC_OL_004_I19	CC_G_01229	CC1G_12159
CC_OL_004_I20	CC_G_01417	CC1G_00481													YCR042C	TAF2	TFIID subunit (150 kDa), involved in RNA polymerase II transcription initiation			0
CC_OL_004_I21	CC_G_01809	CC1G_04434																		0
CC_OL_004_I22	CC_G_01904	CC1G_07779													YHR132C	ECM14	Putative metalloprotease with similarity to the zinc carboxypeptidase family, required for normal cell wall assembly
CC_OL_004_I23	CC_G_01910	CC1G_07792
CC_OL_004_I24	CC_G_02018	CC1G_01316																		0
CC_OL_004_J01	CC_G_02044	CC1G_01263
CC_OL_004_J02	CC_G_02137	CC1G_01435									1
CC_OL_004_J03	CC_G_02290	CC1G_00215													YHR113W		Cytoplasmic aspartyl aminopeptidase; cleaves unblocked N-terminal acidic amino acid residues from peptide substrates; forms a 12 subunit homo-oligomeric complex; M18 metalloprotease family member; may interact with ribosomes			4
CC_OL_004_J04	CC_G_02298	CC1G_00193													YJR126C	VPS70	Protein of unknown function involved in vacuolar protein sorting			0
CC_OL_004_J05	CC_G_02953	CC1G_02379									1
CC_OL_004_J06	CC_G_02995	CC1G_02285																		0
CC_OL_004_J07	CC_G_03012	CC1G_02257						1												0
CC_OL_004_J08	CC_G_03129	CC1G_10898																		0
CC_OL_004_J09	CC_G_03214	CC1G_09936								1
CC_OL_004_J10	CC_G_03244	CC1G_09180									1				YMR297W	PRC1	Vacuolar carboxypeptidase Y (proteinase C), broad-specificity C-terminal exopeptidase involved in non-specific protein degradation in the vacuole; member of the serine carboxypeptidase family
CC_OL_004_J11	CC_G_03406	CC1G_05324									1				YHR027C	RPN1	Non-ATPase base subunit of the 19S regulatory particle of the 26S proteasome; may participate in the recognition of several ligands of the proteasome; contains a leucine-rich repeat (LRR) domain, a site for protein?protein interactions			4
CC_OL_004_J12	CC_A_02973	CC1G_11845																		0
CC_OL_004_J13	CC_G_03523	CC1G_08798								1					YOR197W	MCA1	Putative cysteine protease similar to mammalian caspases; involved in regulation of apoptosis upon hydrogen peroxide treatment; proposed to be involved in cell cycle progression			0
CC_OL_004_J14	CC_G_03542	CC1G_08776																		0
CC_OL_004_J15	CC_G_03744	CC1G_12248																		8
CC_OL_004_J16	CC_G_03810	CC1G_05359																		0
CC_OL_004_J17		CC1G_13291									1
CC_OL_004_J18	CC_G_03941	CC1G_02656																		6
CC_OL_004_J19	CC_G_03947	CC1G_02645													YKR087C	OMA1	Metalloendopeptidase of the mitochondrial inner membrane, involved in turnover of membrane-embedded proteins; member of a family of predicted membrane-bound metallopeptidases in prokaryotes and higher eukaryotes			0
CC_OL_004_J20	CC_G_03971	CC1G_02600					1													0
CC_OL_004_J21	CC_G_04209	CC1G_03439													YIL031W	ULP2	Peptidase that deconjugates Smt3/SUMO-1 peptides from proteins, plays a role in chromosome cohesion at centromeric regions and recovery from checkpoint arrest induced by DNA damage or DNA replication defects; potential Cdc28p substrate			4
CC_OL_004_J22	CC_G_04277	CC1G_03366																		0
CC_OL_004_J23	CC_G_04299	CC1G_03408																		0
CC_OL_004_J24	CC_G_04312	CC1G_03454				1				1					YCL057W	PRD1	Zinc metalloendopeptidase, found in the cytoplasm and intermembrane space of mitochondria; with Cym1p, involved in degradation of mitochondrial proteins and of presequence peptides cleaved from imported proteins
CC_OL_004_K01	CC_G_04772	CC1G_04928																		9
CC_OL_004_K02	CC_G_04870	CC1G_05715																		0
CC_OL_004_K03	CC_G_05114	CC1G_05499													YLL029W	FRA1	Protein involved in negative regulation of transcription of iron regulon; forms an iron independent complex with Fra2p, Grx3p, and Grx4p; cytosolic; mutant fails to repress transcription of iron regulon and is defective in spore formation			3
CC_OL_004_K04	CC_A_04450	CC1G_11771																		0
CC_OL_004_K05	CC_G_05454	CC1G_04273													YLR244C	MAP1	Methionine aminopeptidase, catalyzes the cotranslational removal of N-terminal methionine from nascent polypeptides; function is partially redundant with that of Map2p			0
CC_OL_004_K06	CC_G_05495	CC1G_12012													YNL238W	KEX2	Subtilisin-like protease (proprotein convertase), a calcium-dependent serine protease involved in the activation of proproteins of the secretory pathway			0
CC_OL_004_K07	CC_G_05815	CC1G_06595													YBL091C	MAP2	Methionine aminopeptidase, catalyzes the cotranslational removal of N-terminal methionine from nascent polypeptides; function is partially redundant with that of Map1p
CC_OL_004_K08	CC_A_04948	CC1G_06569													YHR024C	MAS2	Larger subunit of the mitochondrial processing protease (MPP), essential processing enzyme that cleaves the N-terminal targeting sequences from mitochondrially imported proteins			0
CC_OL_004_K09	CC_G_05942	CC1G_04591													YBR074W		Putative metalloprotease			4
CC_OL_004_K10	CC_G_06162	CC1G_06342																		3
CC_OL_004_K11	CC_G_06332	CC1G_03653																		0
CC_OL_004_K12	CC_A_05487	CC1G_10606																		0
CC_OL_004_K13	CC_G_06483	CC1G_10592																		0
CC_OL_004_K14	CC_G_06495	CC1G_10615																		0
CC_OL_004_K15	CC_G_06503	CC1G_10624																		0
CC_OL_004_K16	CC_A_05636	CC1G_05797													YNL223W	ATG4	Conserved cysteine protease required for autophagy; cleaves Atg8p to a form required for autophagosome and Cvt vesicle generation			0
CC_OL_004_K17	CC_G_06713	CC1G_05835													YNL202W	SPS19	Peroxisomal 2,4-dienoyl-CoA reductase, auxiliary enzyme of fatty acid beta-oxidation; homodimeric enzyme required for growth and sporulation on petroselineate medium; expression induced during late sporulation and in the presence of oleate
CC_OL_004_K18	CC_A_05767	CC1G_01969																		0
CC_OL_004_K19	CC_G_06917	CC1G_02037									1									3
CC_OL_004_K20	CC_G_06920	CC1G_02047																		1
CC_OL_004_K21	CC_G_07071	CC1G_05911																		0
CC_OL_004_K22	CC_G_07094	CC1G_05882																		0
CC_OL_004_K23	CC_G_07101	CC1G_05897																		0
CC_OL_004_K24	CC_G_07105	CC1G_05906																		0
CC_OL_004_L01	CC_G_07108	CC1G_05917																		0
CC_OL_004_L02	CC_G_07111	CC1G_05923													YBR286W	APE3	Vacuolar aminopeptidase Y, processed to mature form by Prb1p			0
CC_OL_004_L03	CC_A_06031	CC1G_05940																		0
CC_OL_004_L04	CC_G_07280	CC1G_11192																		0
CC_OL_004_L05	CC_G_07289	CC1G_11206													YJL039C	NUP192	Essential structural subunit of the nuclear pore complex (NPC), localizes to the nuclear periphery of nuclear pores, homologous to human p205			4
CC_OL_004_L06
CC_OL_004_L07	CC_G_07452	CC1G_10851																		0
CC_OL_004_L08	CC_G_07455	CC1G_10848
CC_OL_004_L09	CC_G_07456	CC1G_10849																		0
CC_OL_004_L10	CC_G_07601	CC1G_02120													YNL041C	COG6	Component of the conserved oligomeric Golgi complex (Cog1p through Cog8p), a cytosolic tethering complex that functions in protein trafficking to mediate fusion of transport vesicles to Golgi compartments			0
CC_OL_004_L11	CC_G_07659	CC1G_02140																		0
CC_OL_004_L12	CC_G_07699	CC1G_02238																		7
CC_OL_004_L13	CC_G_08005	CC1G_12414									1									0
CC_OL_004_L14	CC_G_08037	CC1G_10091																		0
CC_OL_004_L15	CC_G_08145	CC1G_09842																		5
CC_OL_004_L16	CC_G_08223	CC1G_08293													YOR306C	MCH5	Plasma membrane riboflavin transporter; facilitates the uptake of vitamin B2; required for FAD-dependent processes; sequence similarity to mammalian monocarboxylate permeases, however mutants are not deficient in monocarboxylate transport			0
CC_OL_004_L17	CC_G_08371	CC1G_02409													YGR098C	ESP1	Separase, a caspase-like cysteine protease that promotes sister chromatid separation by mediating dissociation of the cohesin Scc1p from chromatin; inhibits protein phosphatase 2A-Cdc55p to promote mitotic exit; inhibited by Pds1p			0
CC_OL_004_L18	CC_G_08548	CC1G_09223																		0
CC_OL_004_L19	CC_G_08587	CC1G_12425																		0
CC_OL_004_L20	CC_G_08729	CC1G_06488													YHL016C	DUR3	Plasma membrane transporter for both urea and polyamines, expression is highly sensitive to nitrogen catabolite repression and induced by allophanate, the last intermediate of the allantoin degradative pathway			0
CC_OL_004_L21	CC_A_07374	CC1G_06482													YLR126C		Putative protein of unknown function with similarity to glutamine amidotransferase proteins; has Aft1p-binding motif in the promoter; may be involved in copper and iron homeostasis; YLR126C is not an essential protein			0
CC_OL_004_L22	CC_A_07379	CC1G_06501																		0
CC_OL_004_L23	CC_G_09039	CC1G_10935										1
CC_OL_004_L24	CC_G_09071	CC1G_04021													YHR028C	DAP2	Dipeptidyl aminopeptidase, synthesized as a glycosylated precursor; localizes to the vacuolar membrane; similar to Ste13p
CC_OL_004_M01	CC_G_09127	CC1G_03952
CC_OL_004_M02	CC_G_09207	CC1G_07017										1								0
CC_OL_004_M03	CC_A_08048	CC1G_03799													YOR125C	CAT5	Protein required for ubiquinone (Coenzyme Q) biosynthesis; localizes to the matrix face of the mitochondrial inner membrane in a large complex with ubiquinone biosynthetic enzymes; required for gluconeogenic gene activation
CC_OL_004_M04	CC_G_09687	CC1G_12086																		0
CC_OL_004_M05	CC_A_08182	CC1G_11395													YER078C		Putative mitochondrial metallopeptidase			0
CC_OL_004_M06	CC_G_09895	CC1G_09021													YDR205W	MSC2	Member of the cation diffusion facilitator family, localizes to the endoplasmic reticulum and nucleus; mutations affect the cellular distribution of zinc and also confer defects in meiotic recombination between homologous chromatids			0
CC_OL_004_M07	CC_G_09896	CC1G_09019													YJL172W	CPS1	Vacuolar carboxypeptidase yscS; expression is induced under low-nitrogen conditions			7
CC_OL_004_M08	CC_G_09996	CC1G_05104								1										8
CC_OL_004_M09	CC_G_10053	CC1G_05155													YGL207W	SPT16	Subunit of the heterodimeric FACT complex (Spt16p-Pob3p), facilitates RNA Polymerase II transcription elongation through nucleosomes by destabilizing and then reassembling nucleosome structure
CC_OL_004_M10	CC_G_10103	CC1G_09360																		0
CC_OL_004_M11	CC_G_10442	CC1G_06968													YFR044C	DUG1	Probable di- and tri-peptidase; forms a complex with Dug2p and Dug3p to degrade glutathione (GSH) and other peptides containing a gamma-glu-X bond in an alternative pathway to GSH degradation by gamma-glutamyl transpeptidase (Ecm38p)			0
CC_OL_004_M12	CC_G_10493	CC1G_06945																		0
CC_OL_004_M13	CC_G_10526	CC1G_09863																		0
CC_OL_004_M14	CC_G_10547	CC1G_07476																		0
CC_OL_004_M15	CC_A_08924	CC1G_07467							1											0
CC_OL_004_M16	CC_G_10588	CC1G_07472																		0
CC_OL_004_M17	CC_G_10631	CC1G_08415								1		1		1						9
CC_OL_004_M18	CC_A_09020	CC1G_09554		1																0
CC_OL_004_M19	CC_G_10963	CC1G_04168																		0
CC_OL_004_M20	CC_A_09240	CC1G_04086																		0
CC_OL_004_M21	CC_A_09329	CC1G_08693																		0
CC_OL_004_M22	CC_G_11129	CC1G_08667							1											0
CC_OL_004_M23	CC_A_09418	CC1G_04562																		0
CC_OL_004_M24	CC_G_11331	CC1G_13411																		0
CC_OL_004_N01	CC_G_11824	CC1G_10096																			lap
CC_OL_004_N02	CC_G_12035	CC1G_00916																		3
CC_OL_004_N03	CC_A_10094	CC1G_00851																		0
CC_OL_004_N04	CC_G_12144	CC1G_00802
CC_OL_004_N05	CC_G_12172	CC1G_00861									1				YIL022W	TIM44	Peripheral mitochondrial membrane protein involved in mitochondrial protein import, tethers essential chaperone Ssc1p to the translocon channel at the matrix side of the inner membrane			0
CC_OL_004_N06	CC_G_12185	CC1G_00888																		0
CC_OL_004_N07	CC_G_12193	CC1G_00900																		8
CC_OL_004_N08	CC_G_12346	CC1G_01581							1		1									3
CC_OL_004_N09	CC_G_12358	CC1G_01555													YPR191W	QCR2	Subunit 2 of the ubiquinol cytochrome-c reductase complex, which is a component of the mitochondrial inner membrane electron transport chain; phosphorylated; transcription is regulated by Hap1p, Hap2p/Hap3p, and heme			4
CC_OL_004_N10	CC_G_12483	CC1G_10333																		0
CC_OL_004_N11	CC_G_00404	CC1G_01727													YLR148W	PEP3	Component of CORVET tethering complex; vacuolar peripheral membrane protein that promotes vesicular docking/fusion reactions in conjunction with SNARE proteins, required for vacuolar biogenesis			0
CC_OL_004_N12												1
CC_OL_004_N13	CC_G_08352	CC1G_02438																		0
CC_OL_004_N14	CC_G_04781	CC1G_04948																		0
CC_OL_004_N15	CC_G_07457	CC1G_10850																		7
CC_OL_004_N16	CC_G_07479	CC1G_10536													YBR248C	HIS7	Imidazole glycerol phosphate synthase (glutamine amidotransferase:cyclase), catalyzes the fifth and sixth steps of histidine biosynthesis and also produces 5-aminoimidazole-4-carboxamide ribotide (AICAR), a purine precursor			4
CC_OL_004_N17	CC_G_07703	CC1G_02247																		0
CC_OL_004_N18	CC_G_00374	CC1G_01187													YLR088W	GAA1	Subunit of the GPI (glycosylphosphatidylinositol):protein transamidase complex, removes the GPI-anchoring signal and attaches GPI to proteins in the ER
CC_OL_004_N19	CC_G_06118	CC1G_03122
CC_OL_004_N20	CC_G_08528	CC1G_09217																		0
CC_OL_004_N21	CC_G_08979	CC1G_10652																		0
CC_OL_004_N22	CC_G_11314	CC1G_04564																		0
CC_OL_004_N23	CC_G_12163	CC1G_00839													YBL088C	TEL1	Protein kinase primarily involved in telomere length regulation; contributes to cell cycle checkpoint control in response to DNA damage; functionally redundant with Mec1p; homolog of human ataxia telangiectasia (ATM) gene			0
CC_OL_004_N24		CC1G_07448													YMR190C	SGS1	Nucleolar DNA helicase of the RecQ family involved in maintenance of genome integrity, regulates chromosome synapsis and meiotic crossing over; has similarity to human BLM and WRN helicases implicated in Bloom and Werner syndromes			0
CC_OL_004_O01																					lim15/dmc1
CC_OL_004_O02																					msh5
CC_OL_004_O03		CC1G_03723	1								1				YNL088W	TOP2	Essential type II topoisomerase, relieves torsional strain in DNA by cleaving and re-sealing the phosphodiester backbone of both positively and negatively supercoiled DNA; cleaves complementary strands; localizes to axial cores in meiosis				topII
CC_OL_004_O04		CC1G_05700																			bad42
CC_OL_004_O05	CC_G_05379	CC1G_04228													YBL063W	KIP1	Kinesin-related motor protein required for mitotic spindle assembly and chromosome segregation; functionally redundant with Cin8p
CC_OL_004_O06	CC_G_06536	CC1G_09782								1		1									eln2
CC_OL_004_O07		CC1G_10193																			eln3
CC_OL_004_O08		CC1G_12660																		0	hyt1
CC_OL_004_O09	CC_G_09506	CC1G_08484									1										ich1
CC_OL_004_O10		CC1G_10319													YMR224C	MRE11	Subunit of a complex with Rad50p and Xrs2p (MRX complex) that functions in repair of DNA double-strand breaks and in telomere stability, exhibits nuclease activity that appears to be required for MRX function; widely conserved				mre11
CC_OL_004_O11	CC_G_06387	CC1G_03702													YHR120W	MSH1	DNA-binding protein of the mitochondria involved in repair of mitochondrial DNA, has ATPase activity and binds to DNA mismatches; has homology to E. coli MutS; transcription is induced during meiosis			0
CC_OL_004_O12	CC_G_09313	CC1G_07392																			pcc1
CC_OL_004_O13
CC_OL_004_O14		CC1G_03652																			rad21.2
CC_OL_004_O15	CC_G_05598	CC1G_03010							1						YNL250W	RAD50	Subunit of MRX complex, with Mre11p and Xrs2p, involved in processing double-strand DNA breaks in vegetative cells, initiation of meiotic DSBs, telomere maintenance, and nonhomologous end joining				rad50
CC_OL_004_O16	CC_G_05598	CC1G_03010				1									YNL250W	RAD50	Subunit of MRX complex, with Mre11p and Xrs2p, involved in processing double-strand DNA breaks in vegetative cells, initiation of meiotic DSBs, telomere maintenance, and nonhomologous end joining				rad50
CC_OL_004_O17	CC_G_05598	CC1G_03010							1				1		YNL250W	RAD50	Subunit of MRX complex, with Mre11p and Xrs2p, involved in processing double-strand DNA breaks in vegetative cells, initiation of meiotic DSBs, telomere maintenance, and nonhomologous end joining				rad50
CC_OL_004_O18	CC_A_04582	CC1G_04178													YGL163C	RAD54	DNA-dependent ATPase, stimulates strand exchange by modifying the topology of double-stranded DNA; involved in the recombinational repair of double-strand breaks in DNA during vegetative growth and meiosis; member of the SWI/SNF family			0
CC_OL_004_O19								1													rad9
CC_OL_004_O20		CC1G_10538													YER095W	RAD51	Strand exchange protein, forms a helical filament with DNA that searches for homology; involved in the recombinational repair of double-strand breaks in DNA during vegetative growth and meiosis; homolog of Dmc1p and bacterial RecA protein				rad51
CC_OL_004_O21
CC_OL_004_O22
CC_OL_004_O23	CC_A_09536	CC1G_12258													YJL074C	SMC3	Subunit of the multiprotein cohesin complex required for sister chromatid cohesion in mitotic cells; also required, with Rec8p, for cohesion and recombination during meiosis; phylogenetically conserved SMC chromosomal ATPase family member			0
CC_OL_004_O24		CC1G_03320													YHL022C	SPO11	Meiosis-specific protein that initiates meiotic recombination by catalyzing the formation of double-strand breaks in DNA via a transesterification reaction; required for homologous chromosome pairing and synaptonemal complex formation				spo11
CC_OL_004_P01		CC1G_01097
CC_OL_004_P02	CC_G_05259	CC1G_12048													YCR077C	PAT1	Topoisomerase II-associated deadenylation-dependent mRNA-decapping factor; also required for faithful chromosome transmission, maintenance of rDNA locus stability, and protection of mRNA 3'-UTRs from trimming; functionally linked to Pab1p			0
CC_OL_004_P03
CC_OL_004_P04	CC_G_07126	CC1G_05956													YPR141C	KAR3	Minus-end-directed microtubule motor that functions in mitosis and meiosis, localizes to the spindle pole body and localization is dependent on functional Cik1p, required for nuclear fusion during mating; potential Cdc28p substrate			0
CC_OL_004_P05	CC_G_01467	CC1G_00579																		3
CC_OL_004_P06	CC_A_02341	CC1G_10275													YER146W	LSM5	Lsm (Like Sm) protein; part of heteroheptameric complexes (Lsm2p-7p and either Lsm1p or 8p): cytoplasmic Lsm1p complex involved in mRNA decay; nuclear Lsm8p complex part of U6 snRNP and possibly involved in processing tRNA, snoRNA, and rRNA			0
CC_OL_004_P07	CC_G_05259	CC1G_12048													YCR077C	PAT1	Topoisomerase II-associated deadenylation-dependent mRNA-decapping factor; also required for faithful chromosome transmission, maintenance of rDNA locus stability, and protection of mRNA 3'-UTRs from trimming; functionally linked to Pab1p
CC_OL_004_P08	CC_G_05404	CC1G_04178													YGL163C	RAD54	DNA-dependent ATPase, stimulates strand exchange by modifying the topology of double-stranded DNA; involved in the recombinational repair of double-strand breaks in DNA during vegetative growth and meiosis; member of the SWI/SNF family
CC_OL_004_P09	CC_G_06387	CC1G_03702													YHR120W	MSH1	DNA-binding protein of the mitochondria involved in repair of mitochondrial DNA, has ATPase activity and binds to DNA mismatches; has homology to E. coli MutS; transcription is induced during meiosis
CC_OL_004_P10	CC_G_07126	CC1G_05956													YPR141C	KAR3	Minus-end-directed microtubule motor that functions in mitosis and meiosis, localizes to the spindle pole body and localization is dependent on functional Cik1p, required for nuclear fusion during mating; potential Cdc28p substrate
CC_OL_004_P11	CC_G_07416	CC1G_12817																		0
CC_OL_004_P12	CC_G_10557	CC1G_07448													YMR190C	SGS1	Nucleolar DNA helicase of the RecQ family involved in maintenance of genome integrity, regulates chromosome synapsis and meiotic crossing over; has similarity to human BLM and WRN helicases implicated in Bloom and Werner syndromes
CC_OL_004_P13	CC_G_11346	CC1G_12258													YJL074C	SMC3	Subunit of the multiprotein cohesin complex required for sister chromatid cohesion in mitotic cells; also required, with Rec8p, for cohesion and recombination during meiosis; phylogenetically conserved SMC chromosomal ATPase family member
CC_OL_004_P14	CC_G_12164	CC1G_00839													YBL088C	TEL1	Protein kinase primarily involved in telomere length regulation; contributes to cell cycle checkpoint control in response to DNA damage; functionally redundant with Mec1p; homolog of human ataxia telangiectasia (ATM) gene
CC_OL_004_P15	CC_G_05430	CC1G_04229													YKL160W	ELF1	Transcription elongation factor that contains a conserved zinc finger domain; implicated in the maintenance of proper chromatin structure in actively transcribed regions; deletion inhibits Brome mosaic virus (BMV) gene expression
CC_OL_004_P16	CC_G_05431	CC1G_04230																		0
CC_OL_004_P17	CC_G_03644	CC1G_03522																		0
CC_OL_004_P18	CC_A_04430	CC1G_08102													YMR284W	YKU70	Subunit of the telomeric Ku complex (Yku70p-Yku80p), involved in telomere length maintenance, structure and telomere position effect; relocates to sites of double-strand cleavage to promote nonhomologous end joining during DSB repair			0
CC_OL_004_P19	CC_A_03228
CC_OL_004_P20	CC_G_05858	CC1G_06567																		2
CC_OL_004_P21	CC_G_11854	CC1G_11294																		0
CC_OL_004_P22																					ribosomal DNA
CC_OL_004_P23
CC_OL_004_P24	CC_G_11855	CC1G_11293																			rec8
CC_OL_005_A01	CC_G_05979	CC1G_04641
CC_OL_005_A02	CC_G_09288	CC1G_07355																		0
CC_OL_005_A03	CC_G_04854	CC1G_05690													YFL045C	SEC53	Phosphomannomutase, involved in synthesis of GDP-mannose and dolichol-phosphate-mannose; required for folding and glycosylation of secretory proteins in the ER lumen			5	alg4
CC_OL_005_A04	CC_G_06445	CC1G_11759													YNL329C	PEX6	AAA-peroxin that heterodimerizes with AAA-peroxin Pex1p and participates in the recycling of peroxisomal signal receptor Pex5p from the peroxisomal membrane to the cystosol
CC_OL_005_A05	blank
CC_OL_005_A06	CC_G_11186								1											0
CC_OL_005_A07
CC_OL_005_A08	CC_G_03833	CC1G_05342																		0
CC_OL_005_A09	CC_G_07065	CC1G_05922													YFL024C	EPL1	Component of NuA4, which is an essential histone H4/H2A acetyltransferase complex; homologous to Drosophila Enhancer of Polycomb
CC_OL_005_A10	CC_G_01258	CC1G_08969																		0
CC_OL_005_A11	CC_G_11174	CC1G_10435
CC_OL_005_A12	CC_G_04831	CC1G_05679
CC_OL_005_A13	CC_G_03419	CC1G_12611																		0
CC_OL_005_A14	CC_G_11058	CC1G_04144									1									3
CC_OL_005_A15	CC_G_01276	CC1G_08942																		0
CC_OL_005_A16	CC_G_03715	CC1G_03566																		0
CC_OL_005_A17	CC_G_09798	CC1G_07317							1						YBR296C	PHO89	Na+/Pi cotransporter, active in early growth phase; similar to phosphate transporters of Neurospora crassa; transcription regulated by inorganic phosphate concentrations and Pho4p			0
CC_OL_005_A18																					coH28/29/30/31/32
CC_OL_005_A19	CC_G_03369	CC1G_05249												1						0
CC_OL_005_A20	CC_G_03621	CC1G_03573								1
CC_OL_005_A21	CC_G_07970	CC1G_06749									1				YLL018C	DPS1	Cytoplasmic aspartyl-tRNA synthetase, homodimeric enzyme that catalyzes the specific aspartylation of tRNA(Asp); class II aminoacyl tRNA synthetase; binding to its own mRNA may confer autoregulation			5
CC_OL_005_A22	CC_G_06254	CC1G_06355																		0
CC_OL_005_A23	CC_G_08517	CC1G_09253																		0
CC_OL_005_A24	CC_G_06901	CC1G_02002													YNR008W	LRO1	Acyltransferase that catalyzes diacylglycerol esterification; one of several acyltransferases that contribute to triglyceride synthesis; putative homolog of human lecithin cholesterol acyltransferase
CC_OL_005_B01	CC_G_04848	CC1G_05671																		7
CC_OL_005_B02	CC_G_12217	CC1G_00937													YJL056C	ZAP1	Zinc-regulated transcription factor, binds to zinc-responsive promoter elements to induce transcription of certain genes in the presence of zinc; regulates its own transcription; contains seven zinc-finger domains			4
CC_OL_005_B03	CC_G_02562	CC1G_00359													YFR041C	ERJ5	Type I membrane protein with a J domain is required to preserve the folding capacity of the endoplasmic reticulum; loss of the non-essential ERJ5 gene leads to a constitutively induced unfolded protein response
CC_OL_005_B04	CC_G_03482	CC1G_10695																		0
CC_OL_005_B05	CC_G_04125	CC1G_11720																		0
CC_OL_005_B06	CC_G_07974	CC1G_06756													YOL139C	CDC33	Cytoplasmic mRNA cap binding protein and translation initiation factor eIF4E; the eIF4E-cap complex is responsible for mediating cap-dependent mRNA translation via interactions with translation initiation factor eIF4G (Tif4631p or Tif4632p)			3
CC_OL_005_B07	CC_G_10844	CC1G_09693																		0
CC_OL_005_B08	CC_G_09222	CC1G_06981													YOR304W	ISW2	Member of the imitation-switch (ISWI) class of ATP-dependent chromatin remodeling complexes; ATPase component that, with Itc1p, forms a complex required for repression of a-specific genes, INO1, and early meiotic genes during mitotic growth
CC_OL_005_B09	CC_G_06875	CC1G_01943																		0
CC_OL_005_B10	CC_G_08329
CC_OL_005_B11	CC_G_01780	CC1G_04356								1					YCR008W	SAT4	Ser/Thr protein kinase involved in salt tolerance; funtions in regulation of Trk1p-Trk2p potassium transporter; partially redundant with Hal5p; has similarity to Npr1p			0
CC_OL_005_B12	CC_G_08193	CC1G_09909													YNL262W	POL2	Catalytic subunit of DNA polymerase (II) epsilon, one of the major chromosomal DNA replication polymerases characterized by processivity and proofreading exonuclease activity; also involved in DNA synthesis during DNA repair			0
CC_OL_005_B13	CC_G_11917	CC1G_08126													YBR136W	MEC1	Genome integrity checkpoint protein and PI kinase superfamily member; signal transducer required for cell cycle arrest and transcriptional responses prompted by damaged or unreplicated DNA; monitors and participates in meiotic recombination			4
CC_OL_005_B14	CC_G_09381	CC1G_10497																		0
CC_OL_005_B15	CC_G_07321
CC_OL_005_B16	CC_G_12461	CC1G_01618																		0
CC_OL_005_B17	CC_G_07097	CC1G_05892																		0
CC_OL_005_B18	CC_G_07389	CC1G_10778																		0
CC_OL_005_B19	CC_G_10675	CC1G_10232																		0
CC_OL_005_B20	CC_G_07577	CC1G_02163																		0
CC_OL_005_B21	CC_G_00935	CC1G_06404																		0
CC_OL_005_B22	CC_G_12101	CC1G_00775								1					YDR069C	DOA4	Ubiquitin isopeptidase, required for recycling ubiquitin from proteasome-bound ubiquitinated intermediates, acts at the late endosome/prevacuolar compartment to recover ubiquitin from ubiquitinated membrane proteins en route to the vacuole			0
CC_OL_005_B23	CC_G_09575	CC1G_03800																		3
CC_OL_005_B24	CC_G_03253	CC1G_09160																		0
CC_OL_005_C01	CC_G_03897	CC1G_12280																		0
CC_OL_005_C02	CC_G_03697	CC1G_03527									1									4
CC_OL_005_C03	CC_G_04635	CC1G_13274																		0
CC_OL_005_C04	CC_G_06940	CC1G_10345																		0
CC_OL_005_C05	CC_G_08728	CC1G_06491																		0
CC_OL_005_C06	CC_G_10884	CC1G_11540													YOR335C	ALA1	Cytoplasmic alanyl-tRNA synthetase, required for protein synthesis; point mutation (cdc64-1 allele) causes cell cycle arrest at G1; lethality of null mutation is functionally complemented by human homolog
CC_OL_005_C07	CC_G_02671	CC1G_13410																		0
CC_OL_005_C08	CC_G_02020	CC1G_01313																		0
CC_OL_005_C09
CC_OL_005_C10	CC_G_01811	CC1G_04437																		0
CC_OL_005_C11	CC_G_02443	CC1G_00130																		0
CC_OL_005_C12	CC_G_09984	CC1G_05126																		2
CC_OL_005_C13	CC_G_07988	CC1G_06782													YML118W	NGL3	Putative endonuclease, has a domain similar to a magnesium-dependent endonuclease motif in mRNA deadenylase Ccr4p; similar to Ngl1p and Ngl2p			0
CC_OL_005_C14	CC_G_07555	CC1G_02217
CC_OL_005_C15	CC_G_04249	CC1G_03371																		0
CC_OL_005_C16	CC_G_06181	CC1G_06302													YLR240W	VPS34	Phosphatidylinositol 3-kinase responsible for the synthesis of phosphatidylinositol 3-phosphate; forms membrane-associated signal transduction complex with Vps15p to regulate protein sorting; activated by the GTP-bound form of Gpa1p			0
CC_OL_005_C17	CC_G_06547	CC1G_09800													YOR058C	ASE1	Mitotic spindle midzone localized microtubule-associated protein (MAP) family member; required for spindle elongation and stabilization; undergoes cell cycle-regulated degradation by anaphase promoting complex; potential Cdc28p substrate			0
CC_OL_005_C18	CC_G_02523	CC1G_00279													YDR172W	SUP35	Translation termination factor eRF3; altered protein conformation creates the [PSI(+)] prion, a dominant cytoplasmically inherited protein aggregate that alters translational fidelity and creates a nonsense suppressor phenotype			3
CC_OL_005_C19	CC_G_06399	CC1G_03722													YFR009W	GCN20	Positive regulator of the Gcn2p kinase activity, forms a complex with Gcn1p; proposed to stimulate Gcn2p activation by an uncharged tRNA
CC_OL_005_C20	CC_G_09620	CC1G_03895																		0
CC_OL_005_C21	CC_G_08405	CC1G_02488																		0
CC_OL_005_C22	CC_G_02974	CC1G_02328													YML049C	RSE1	Protein involved in pre-mRNA splicing; component of the pre-spliceosome; associates with U2 snRNA; involved in ER to Golgi transport			3
CC_OL_005_C23	CC_G_01566	CC1G_09070																		0
CC_OL_005_C24	CC_G_08460	CC1G_08221																		0
CC_OL_005_D01	CC_G_10484	CC1G_06928																		8
CC_OL_005_D02	CC_G_05235	CC1G_11776
CC_OL_005_D03	CC_G_01600	CC1G_07260																		0
CC_OL_005_D04	CC_G_03956	CC1G_02628													YPR015C		Putative protein of unknown function; overexpression causes a cell cycle delay or arrest			0
CC_OL_005_D05	CC_G_02951	CC1G_02381									1									0
CC_OL_005_D06	CC_G_04159
CC_OL_005_D07	CC_G_05960	CC1G_04599																		0
CC_OL_005_D08	CC_G_02629	CC1G_00470																		0
CC_OL_005_D09	CC_G_12383	CC1G_01501																		0
CC_OL_005_D10	CC_G_01143	CC1G_03297																		0
CC_OL_005_D11	CC_G_05872	CC1G_06593													YER019W	ISC1	Mitochondrial membrane localized inositol phosphosphingolipid phospholipase C, hydrolyzes complex sphingolipids to produce ceramide; activated by phosphatidylserine, cardiolipin, and phosphatidylglycerol; mediates Na+ and Li+ halotolerance			0
CC_OL_005_D12	CC_G_02494	CC1G_00221													YKR088C	TVP38	Integral membrane protein localized to late Golgi vesicles along with the v-SNARE Tlg2p; green fluorescent protein (GFP)-fusion protein localizes to the cytoplasm in a punctate pattern
CC_OL_005_D13	CC_G_06674	CC1G_05774																		0
CC_OL_005_D14	CC_G_04411	CC1G_13019									1
CC_OL_005_D15	CC_G_09382
CC_OL_005_D16	CC_G_08699	CC1G_09446																		0
CC_OL_005_D17	CC_G_05773	CC1G_09266													YPL106C	SSE1	ATPase that is a component of the heat shock protein Hsp90 chaperone complex; binds unfolded proteins; member of the heat shock protein 70 (HSP70) family; localized to the cytoplasm			0
CC_OL_005_D18	CC_G_02269	CC1G_00261													YIR009W	MSL1	U2B component of U2 snRNP, involved in splicing, binds the U2 snRNA stem-loop IV in vitro; does not contain the conserved C-terminal RNA binding domain found in other family members			0
CC_OL_005_D19	CC_G_07437
CC_OL_005_D20	CC_G_03678	CC1G_03489																		0
CC_OL_005_D21	CC_G_02648	CC1G_10552																		0
CC_OL_005_D22	CC_G_06667	CC1G_05795																		0
CC_OL_005_D23	CC_G_09634	CC1G_03921													YMR152W	YIM1	Protein of unknown function; null mutant displays sensitivity to DNA damaging agents; the authentic, non-tagged protein is detected in highly purified mitochondria in high-throughput studies			0
CC_OL_005_D24	CC_G_03590	CC1G_11375
CC_OL_005_E01	blank
CC_OL_005_E02	CC_G_12056	CC1G_00856				1							1
CC_OL_005_E03	CC_G_02295	CC1G_00197													YER050C	RSM18	Mitochondrial ribosomal protein of the small subunit, has similarity to E. coli S18 ribosomal protein			4
CC_OL_005_E04
CC_OL_005_E05	CC_G_11966	CC1G_11418																		0
CC_OL_005_E06	CC_G_12373	CC1G_01523																		0
CC_OL_005_E07	CC_G_05057	CC1G_05503													YPL175W	SPT14	UDP-GlcNAc-binding and catalytic subunit of the enzyme that mediates the first step in glycosylphosphatidylinositol (GPI) biosynthesis, mutations cause defects in transcription and in biogenesis of cell wall proteins			0
CC_OL_005_E08	CC_G_05824	CC1G_06573																		0
CC_OL_005_E09	CC_G_10989	CC1G_04105																		0
CC_OL_005_E10	CC_G_04798	CC1G_05740
CC_OL_005_E11	CC_G_09576	CC1G_03800
CC_OL_005_E12	CC_G_11881	CC1G_08166									1
CC_OL_005_E13	blank
CC_OL_005_E14	CC_G_05753	CC1G_09293																		0
CC_OL_005_E15	CC_G_10994	CC1G_04093
CC_OL_005_E16	CC_G_05573	CC1G_07595																		0
CC_OL_005_E17	CC_G_10030	CC1G_05115																		2
CC_OL_005_E18	CC_G_08090	CC1G_08329													YPL059W	GRX5	Hydroperoxide and superoxide-radical responsive glutathione-dependent oxidoreductase; mitochondrial matrix protein involved in the synthesis/assembly of iron-sulfur centers; monothiol glutaredoxin subfamily member along with Grx3p and Grx4p			2
CC_OL_005_E19	CC_G_02359	CC1G_00058								1					YDR232W	HEM1	5-aminolevulinate synthase, catalyzes the first step in the heme biosynthetic pathway; an N-terminal signal sequence is required for localization to the mitochondrial matrix; expression is regulated by Hap2p-Hap3p
CC_OL_005_E20	CC_G_10379	CC1G_06193								1										0
CC_OL_005_E21	CC_G_10253	CC1G_04723																		0
CC_OL_005_E22	CC_G_04447	CC1G_12859								1				1						0
CC_OL_005_E23	CC_G_07813	CC1G_05062																		0
CC_OL_005_E24	CC_G_09147	CC1G_04003																		0
CC_OL_005_F01	CC_G_07752	CC1G_04974
CC_OL_005_F02	CC_G_12222	CC1G_00947
CC_OL_005_F03
CC_OL_005_F04	CC_G_08267	CC1G_08307									1				YDL014W	NOP1	Nucleolar protein, component of the small subunit processome complex, which is required for processing of pre-18S rRNA; has similarity to mammalian fibrillarin			3
CC_OL_005_F05	CC_G_08023	CC1G_10085																		0
CC_OL_005_F06	CC_G_09863	CC1G_11835									1				YDR188W	CCT6	Subunit of the cytosolic chaperonin Cct ring complex, related to Tcp1p, essential protein that is required for the assembly of actin and tubulins in vivo; contains an ATP-binding motif			2
CC_OL_005_F07	CC_G_11036	CC1G_04099																		0
CC_OL_005_F08	CC_G_02481	CC1G_00199
CC_OL_005_F09	CC_G_00202	CC1G_01186										1			YDL087C	LUC7	Essential protein associated with the U1 snRNP complex; splicing factor involved in recognition of 5' splice site; contains two zinc finger motifs; N-terminal zinc finger binds pre-mRNA
CC_OL_005_F10	CC_G_02376	CC1G_00023																		0
CC_OL_005_F11	CC_G_05137	CC1G_13279																		0
CC_OL_005_F12	CC_G_10723	CC1G_09572													YDR155C	CPR1	Cytoplasmic peptidyl-prolyl cis-trans isomerase (cyclophilin), catalyzes the cis-trans isomerization of peptide bonds N-terminal to proline residues; binds the drug cyclosporin A			0
CC_OL_005_F13	CC_G_00818	CC1G_07543		1				1		1										0
CC_OL_005_F14	CC_G_03357	CC1G_05223																		7
CC_OL_005_F15	CC_G_03283	CC1G_09185								1
CC_OL_005_F16	CC_G_05193	CC1G_08077																		0
CC_OL_005_F17	CC_G_01343	CC1G_00703																		0
CC_OL_005_F18	CC_G_04660
CC_OL_005_F19	CC_G_00947	CC1G_06381																		0
CC_OL_005_F20	CC_G_07766	CC1G_04959																		0
CC_OL_005_F21	CC_G_05535	CC1G_07610													YCR023C		Vacuolar membrane protein of unknown function; member of the multidrug resistance family; YCR023C is not an essential gene			7
CC_OL_005_F22	CC_G_00913	CC1G_11456									1				YLR216C	CPR6	Peptidyl-prolyl cis-trans isomerase (cyclophilin), catalyzes the cis-trans isomerization of peptide bonds N-terminal to proline residues; binds to Hsp82p and contributes to chaperone activity			0
CC_OL_005_F23	CC_G_06832	CC1G_01895													YNL240C	NAR1	Nuclear architecture related protein; component of the cytosolic iron-sulfur (FeS) protein assembly machinery, required for maturation of cytosolic and nuclear FeS proteins; homologous to human Narf			0
CC_OL_005_F24	CC_G_07358	CC1G_09353
CC_OL_005_G01	CC_G_12105	CC1G_00768																		4
CC_OL_005_G02	CC_G_09416	CC1G_07644																		0
CC_OL_005_G03	CC_G_10648	CC1G_10243																		0
CC_OL_005_G04	CC_G_12149	CC1G_00812																		0
CC_OL_005_G05	CC_G_03058	CC1G_02361																		0
CC_OL_005_G06	CC_G_01095	CC1G_03210													YBR239C		Putative protein of unknown function; green fluorescent protein (GFP)-fusion protein localizes to the cytoplasm and nucleus; plays a role in restricting Ty1 transposition			9
CC_OL_005_G07	CC_G_07024	CC1G_10389									1									0
CC_OL_005_G08	CC_G_00664	CC1G_12448																		0
CC_OL_005_G09	CC_G_06915	CC1G_02035													YNL129W	NRK1	Nicotinamide riboside kinase, catalyzes the phosphorylation of nicotinamide riboside and nicotinic acid riboside in salvage pathways for NAD+ biosynthesis			0
CC_OL_005_G10	CC_G_12331	CC1G_01607
CC_OL_005_G11	CC_G_09811	CC1G_07297
CC_OL_005_G12	CC_G_10026	CC1G_05107																		0
CC_OL_005_G13	CC_G_00060	CC1G_07854									1
CC_OL_005_G14	CC_G_04051	CC1G_02700													YDR536W	STL1	Glycerol proton symporter of the plasma membrane, subject to glucose-induced inactivation, strongly but transiently induced when cells are subjected to osmotic shock
CC_OL_005_G15	CC_G_00371
CC_OL_005_G16	CC_G_08381	CC1G_02430													YHR176W	FMO1	Flavin-containing monooxygenase, localized to the cytoplasmic face of the ER membrane; catalyzes oxidation of biological thiols to maintain the ER redox buffer ratio for correct folding of disulfide-bonded proteins			0
CC_OL_005_G17	CC_G_10187	CC1G_11278																		0
CC_OL_005_G18	CC_G_05356	CC1G_04285													YHL013C	OTU2	Protein of unknown function that may interact with ribosomes, based on co-purification experiments; member of the ovarian tumor-like (OTU) superfamily of predicted cysteine proteases; shows cytoplasmic localization
CC_OL_005_G19	CC_G_04065	CC1G_02733													YFR050C	PRE4	Beta 7 subunit of the 20S proteasome			2
CC_OL_005_G20	CC_G_06371	CC1G_03670									1									2
CC_OL_005_G21	CC_G_05040	CC1G_05528																		0
CC_OL_005_G22	CC_G_01703	CC1G_12976													YDR419W	RAD30	DNA polymerase eta, involved in the predominantly error-free bypass replication of DNA lesions, catalyzes the efficient and accurate synthesis of DNA opposite cyclobutane pyrimidine dimers; homolog of human POLH and bacterial DinB proteins			0
CC_OL_005_G23	CC_G_07313	CC1G_09327													YNL286W	CUS2	Protein that binds to U2 snRNA and Prp11p, may be involved in U2 snRNA folding; contains two RNA recognition motifs (RRMs)			0
CC_OL_005_G24	CC_G_01733	CC1G_04384																		0
CC_OL_005_H01	CC_G_05551	CC1G_07572													YLR340W	RPP0	Conserved ribosomal protein P0 similar to rat P0, human P0, and E. coli L10e; shown to be phosphorylated on serine 302			4
CC_OL_005_H02	CC_G_00854	CC1G_07510
CC_OL_005_H03	CC_G_10090	CC1G_09391																		0
CC_OL_005_H04	CC_G_04494	CC1G_02872													YDR128W		Putative protein of unknown function; YDR128W is synthetically sick with cdc13-1			0
CC_OL_005_H05	CC_G_01991	CC1G_01363
CC_OL_005_H06	CC_G_00059	CC1G_07851																		0
CC_OL_005_H07	CC_G_12519	CC1G_10341																		0
CC_OL_005_H08
CC_OL_005_H09	CC_G_03040	CC1G_02315													YKR017C		Putative protein of unknown function; contains a RING finger motif
CC_OL_005_H10	CC_G_04839	CC1G_05661													YGL206C	CHC1	Clathrin heavy chain, subunit of the major coat protein involved in intracellular protein transport and endocytosis; two heavy chains form the clathrin triskelion structural component; the light chain (CLC1) is thought to regulate function			4
CC_OL_005_H11	CC_G_12069	CC1G_00840									1				YHL007C	STE20	Signal transducing kinase of the PAK (p21-activated kinase) family, involved in pheromone response and pseudohyphal/invasive growth pathways, activated by Cdc42p; binds Ste4p at a GBB motif present in noncatalytic domains of PAK kinases			0
CC_OL_005_H12	CC_G_10707
CC_OL_005_H13
CC_OL_005_H14	CC_G_11136	CC1G_08685
CC_OL_005_H15	CC_G_07582	CC1G_02154																		0
CC_OL_005_H16	CC_G_07818
CC_OL_005_H17	CC_G_05778	CC1G_09275													YER020W	GPA2	Nucleotide binding alpha subunit of the heterotrimeric G protein that interacts with the receptor Gpr1p, has signaling role in response to nutrients; green fluorescent protein (GFP)-fusion protein localizes to the cell periphery
CC_OL_005_H18	CC_G_05829	CC1G_06563								1		1		1	YLR300W	EXG1	Major exo-1,3-beta-glucanase of the cell wall, involved in cell wall beta-glucan assembly; exists as three differentially glycosylated isoenzymes			9
CC_OL_005_H19	CC_G_11113	CC1G_08681																		0
CC_OL_005_H20	CC_G_01498
CC_OL_005_H21	CC_G_00564	CC1G_01820													YOR151C	RPB2	RNA polymerase II second largest subunit B150, part of central core; similar to bacterial beta subunit			1
CC_OL_005_H22	CC_G_00918	CC1G_06441																		0
CC_OL_005_H23	CC_G_01151	CC1G_03314																		0
CC_OL_005_H24	CC_G_01322	CC1G_00737																		0
CC_OL_005_I01	blank
CC_OL_005_I02	CC_G_07979	CC1G_06764													YLR309C	IMH1	Protein involved in vesicular transport, mediates transport between an endosomal compartment and the Golgi, contains a Golgi-localization (GRIP) domain that interacts with activated Arl1p-GTP to localize Imh1p to the Golgi			0
CC_OL_005_I03	CC_G_04543	CC1G_02784																		0
CC_OL_005_I04	CC_G_00892	CC1G_11454
CC_OL_005_I05	CC_G_00106	CC1G_08623																		0
CC_OL_005_I06	CC_G_00021	CC1G_07843																		0
CC_OL_005_I07	CC_G_09325	CC1G_07412													YLR084C	RAX2	N-glycosylated protein involved in the maintenance of bud site selection during bipolar budding; localization requires Rax1p			0
CC_OL_005_I08	CC_G_10682	CC1G_10250			1				1
CC_OL_005_I09	CC_G_03365	CC1G_05239																		0
CC_OL_005_I10	CC_G_09285	CC1G_07360																		0
CC_OL_005_I11	CC_G_05393	CC1G_04196													YMR048W	CSM3	Protein required for accurate chromosome segregation during meiosis			0
CC_OL_005_I12	CC_G_06765	CC1G_12905																		0
CC_OL_005_I13	blank
CC_OL_005_I14	CC_G_10407	CC1G_06254																		0
CC_OL_005_I15	CC_G_12250	CC1G_12372																		0
CC_OL_005_I16	CC_G_02845	CC1G_10835																		0
CC_OL_005_I17	CC_G_02040	CC1G_01272													YNR026C	SEC12	Guanine nucleotide exchange factor (GEF); glycosylated integral membrane protein of the endoplasmic reticulum, important for the initiation of transport vesicle budding from the endoplasmic reticulum through activation of the GTPase Sar1p			0
CC_OL_005_I18	CC_G_12206	CC1G_00919																		0
CC_OL_005_I19	CC_G_11449	CC1G_06643													YOR254C	SEC63	Essential subunit of Sec63 complex (Sec63p, Sec62p, Sec66p and Sec72p); with Sec61 complex, Kar2p/BiP and Lhs1p forms a channel competent for SRP-dependent and post-translational SRP-independent protein targeting and import into the ER			0
CC_OL_005_I20	CC_G_07647	CC1G_02113																		0
CC_OL_005_I21	CC_G_08659	CC1G_09443							1						YER154W	OXA1	Mitochondrial inner membrane insertase, mediates the insertion of both mitochondrial- and nuclear-encoded proteins from the matrix into the inner membrane, interacts with mitochondrial ribosomes; conserved from bacteria to animals			4
CC_OL_005_I22	CC_G_04322	CC1G_03475																		0
CC_OL_005_I23	CC_G_01958	CC1G_01437																		0
CC_OL_005_I24	CC_G_12433	CC1G_01562																		0
CC_OL_005_J01	CC_G_10435																			0
CC_OL_005_J02	CC_G_12235	CC1G_00975													YCL032W	STE50	Protein involved in mating response, invasive/filamentous growth, and osmotolerance, acts as an adaptor that links G protein-associated Cdc42p-Ste20p complex to the effector Ste11p to modulate signal transduction
CC_OL_005_J03	CC_G_06703	CC1G_05818													YER082C	UTP7	Nucleolar protein, component of the small subunit (SSU) processome containing the U3 snoRNA that is involved in processing of pre-18S rRNA
CC_OL_005_J04	CC_G_05103	CC1G_05478																		0
CC_OL_005_J05	CC_G_09195	CC1G_07039																		0
CC_OL_005_J06	CC_G_06075	CC1G_03046																		0
CC_OL_005_J07	CC_G_07968
CC_OL_005_J08	CC_G_01905	CC1G_07780																		0
CC_OL_005_J09	CC_G_08700	CC1G_09447							1											0
CC_OL_005_J10	CC_G_10868
CC_OL_005_J11	CC_G_00884	CC1G_13518
CC_OL_005_J12	CC_G_08198	CC1G_09900									1				YDL091C	UBX3	UBX (ubiquitin regulatory X) domain-containing protein that interacts with Cdc48p, green fluorescent protein (GFP)-fusion protein localizes to the cytoplasm in a punctate pattern			0
CC_OL_005_J13	CC_G_12416	CC1G_01536								1										0
CC_OL_005_J14	CC_G_01053	CC1G_03255									1									0
CC_OL_005_J15	CC_G_07428	CC1G_13156																		0
CC_OL_005_J16	CC_G_04290	CC1G_03391																		0
CC_OL_005_J17	CC_G_09791	CC1G_07332																		0
CC_OL_005_J18	CC_G_05846	CC1G_06536																		0
CC_OL_005_J19	CC_G_06164	CC1G_06336																		0
CC_OL_005_J20	CC_G_02460	CC1G_00156																		9
CC_OL_005_J21	CC_G_00465	CC1G_01777																		0
CC_OL_005_J22	CC_G_06019	CC1G_03156																		0
CC_OL_005_J23	CC_G_07505	CC1G_10519																		0
CC_OL_005_J24	CC_G_11630	CC1G_05999																		0
CC_OL_005_K01	CC_G_05895	CC1G_04677																		0
CC_OL_005_K02	CC_G_05936
CC_OL_005_K03	CC_G_00747	CC1G_08614													YPL054W	LEE1	Zinc-finger protein of unknown function			0
CC_OL_005_K04	CC_G_01996	CC1G_01351													YDL114W		Putative protein of unknown function with similarity to acyl-carrier-protein reductases; YDL114W is not an essential gene			3
CC_OL_005_K05	CC_G_08150	CC1G_09835													YDL146W	LDB17	Protein of unknown function; GFP-fusion protein localizes to the cell periphery, cytoplasm, bud, and bud neck; null mutant shows a reduced affinity for the alcian blue dye suggesting a decreased net negative charge of the cell surface			0
CC_OL_005_K06	CC_G_03615	CC1G_03588																		7
CC_OL_005_K07	CC_G_10832	CC1G_09696												1	YNL172W	APC1	Largest subunit of the Anaphase-Promoting Complex/Cyclosome (APC/C), which is a ubiquitin-protein ligase required for degradation of anaphase inhibitors, including mitotic cyclins, during the metaphase/anaphase transition			7
CC_OL_005_K08	CC_G_06245	CC1G_06340													YLR196W	PWP1	Protein with WD-40 repeats involved in rRNA processing; associates with trans-acting ribosome biogenesis factors; similar to beta-transducin superfamily			3
CC_OL_005_K09	CC_G_09074	CC1G_04016																		0
CC_OL_005_K10	CC_G_00416	CC1G_01876																		0
CC_OL_005_K11	CC_G_04658	CC1G_11594																		0
CC_OL_005_K12
CC_OL_005_K13	CC_G_12518	CC1G_10340																		0
CC_OL_005_K14	CC_G_10725	CC1G_09579																		0
CC_OL_005_K15	CC_G_06689	CC1G_05791																		0
CC_OL_005_K16	CC_G_10434	CC1G_11666																		0
CC_OL_005_K17	CC_G_03167	CC1G_12121
CC_OL_005_K18	CC_G_09562	CC1G_03795																		0
CC_OL_005_K19	CC_G_11478
CC_OL_005_K20	CC_G_03024	CC1G_02280								1					YHR175W	CTR2	Putative low-affinity copper transporter of the vacuolar membrane; mutation confers resistance to toxic copper concentrations, while overexpression confers resistance to copper starvation			0
CC_OL_005_K21	CC_G_07362	CC1G_13365																		0
CC_OL_005_K22	CC_G_09499	CC1G_08462																		0
CC_OL_005_K23
CC_OL_005_K24	CC_G_10404	CC1G_06246																		0
CC_OL_005_L01	CC_G_12399	CC1G_01498																		0
CC_OL_005_L02		CC1G_04048
CC_OL_005_L03	CC_G_08458	CC1G_08224								1		1		1
CC_OL_005_L04	CC_G_07707	CC1G_05066													YPL217C	BMS1	Essential conserved nucleolar GTP-binding protein required for synthesis of 40S ribosomal subunits and for processing of the 35S pre-rRNA at sites A0, A1, and A2; interacts with Rcl1p, has similarity to Tsr1p			0
CC_OL_005_L05	CC_G_01668	CC1G_11918													YHR154W	RTT107	Protein implicated in Mms22-dependent DNA repair during S phase, DNA damage induces phosphorylation by Mec1p at one or more SQ/TQ motifs; interacts with Mms22p and Slx4p; has four BRCT domains; has a role in regulation of Ty1 transposition
CC_OL_005_L06	CC_G_07405	CC1G_13239								1		1		1						0
CC_OL_005_L07	CC_G_06630	CC1G_11086																		0
CC_OL_005_L08	CC_G_11203	CC1G_04563
CC_OL_005_L09	CC_G_12196	CC1G_00905													YBL089W	AVT5	Putative transporter, member of a family of seven S. cerevisiae genes (AVT1-7) related to vesicular GABA-glycine transporters			9
CC_OL_005_L10	CC_G_05574	CC1G_07596
CC_OL_005_L11	CC_G_02417	CC1G_00080													YIL103W	DPH1	Protein required, along with Dph2p, Kti11p, Jjj3p, and Dph5p, for synthesis of diphthamide, which is a modified histidine residue of translation elongation factor 2 (Eft1p or Eft2p); may act in a complex with Dph2p and Kti11p			0
CC_OL_005_L12	CC_G_08167	CC1G_09841																		0
CC_OL_005_L13	CC_G_08480	CC1G_08183													YER059W	PCL6	Pho85p cyclin of the Pho80p subfamily; forms the major Glc8p kinase together with Pcl7p and Pho85p; involved in the control of glycogen storage by Pho85p; stabilized by Elongin C binding			0
CC_OL_005_L14	CC_G_04986	CC1G_09541																		0
CC_OL_005_L15	CC_G_04625	CC1G_02878													YOL033W	MSE1	Mitochondrial glutamyl-tRNA synthetase, predicted to be palmitoylated			0
CC_OL_005_L16	CC_G_11493	CC1G_06696
CC_OL_005_L17	CC_G_11560	CC1G_08727
CC_OL_005_L18	CC_G_03411
CC_OL_005_L19	CC_G_11360	CC1G_11651																		0
CC_OL_005_L20	CC_G_00765	CC1G_08581
CC_OL_005_L21	CC_G_12198	CC1G_00908													YJL140W	RPB4	RNA polymerase II subunit B32; forms two subunit dissociable complex with Rpb7p; involved recruitment of 3'-end processing factors to transcribing RNA polymerase II complex and in export of mRNA to cytoplasm under stress conditions			1
CC_OL_005_L22	CC_G_12356	CC1G_01557									1									0
CC_OL_005_L23	CC_G_01360	CC1G_00669									1									0
CC_OL_005_L24	CC_G_06191	CC1G_06272																		0
CC_OL_005_M01	blank
CC_OL_005_M02	CC_G_11166	CC1G_10432																		0
CC_OL_005_M03	CC_G_09376	CC1G_10491																		0
CC_OL_005_M04	CC_G_03823	CC1G_05331																		0
CC_OL_005_M05	CC_G_09116	CC1G_03929																		0
CC_OL_005_M06	CC_G_10748	CC1G_08865																		0
CC_OL_005_M07	CC_G_04966	CC1G_10701																		0
CC_OL_005_M08	CC_G_02350	CC1G_00069																		6
CC_OL_005_M09	CC_G_07458	CC1G_10853	1																	3
CC_OL_005_M10	CC_G_00094	CC1G_08650																		0
CC_OL_005_M11	CC_G_08220	CC1G_08299		1					1											0
CC_OL_005_M12	CC_G_06323	CC1G_03668																		0
CC_OL_005_M13	blank
CC_OL_005_M14	CC_G_11016	CC1G_04054																		0
CC_OL_005_M15	CC_G_06078	CC1G_03051																		0
CC_OL_005_M16	CC_G_06085	CC1G_03065																		0
CC_OL_005_M17	CC_G_10661	CC1G_10221																		0
CC_OL_005_M18	CC_G_01700	CC1G_12950
CC_OL_005_M19	CC_G_08469	CC1G_08198																		0
CC_OL_005_M20	CC_G_06567	CC1G_09748																		0
CC_OL_005_M21	CC_G_09785	CC1G_07741																		0
CC_OL_005_M22	CC_G_00463	CC1G_01781																		8
CC_OL_005_M23	CC_G_07128	CC1G_13335													YGR006W	PRP18	Splicing factor involved in the positioning of the 3' splice site during the second catalytic step of splicing, part of snRNP U5, interacts with Slu7p
CC_OL_005_M24	CC_G_02174	CC1G_00462													YER045C	ACA1	Basic leucine zipper (bZIP) transcription factor of the ATF/CREB family, may regulate transcription of genes involved in utilization of non-optimal carbon sources			0
CC_OL_005_N01	CC_G_01084	CC1G_03193
CC_OL_005_N02	CC_G_05608	CC1G_02997																		0
CC_OL_005_N03	CC_G_01463	CC1G_00570													YIL096C		Putative protein of unknown function; associates with precursors of the 60S ribosomal subunit			0
CC_OL_005_N04	CC_G_01516	CC1G_00707									1				YHR050W	SMF2	Divalent metal ion transporter involved in manganese homeostasis; has broad specificity for di-valent and tri-valent metals; post-translationally regulated by levels of metal ions; member of the Nramp family of metal transport proteins			6
CC_OL_005_N05	CC_G_04840
CC_OL_005_N06	CC_G_04626	CC1G_02879													YLR024C	UBR2	Cytoplasmic ubiquitin-protein ligase (E3); required for ubiquitylation of Rpn4p; mediates formation of a Mub1p-Ubr2p-Rad6p complex			8
CC_OL_005_N07	CC_G_11237	CC1G_04488																		3
CC_OL_005_N08	CC_G_10163	CC1G_09998																		0
CC_OL_005_N09	CC_G_04529	CC1G_02804																		0
CC_OL_005_N10	CC_G_09286	CC1G_07358													YMR292W	GOT1	Evolutionarily conserved non-essential protein present in early Golgi cisternae that may be involved in ER-Golgi transport at a step after vesicle tethering to Golgi membranes, exhibits membrane topology similar to that of Sft2p			4
CC_OL_005_N11	CC_G_01514	CC1G_00704																		0
CC_OL_005_N12	CC_G_09849	CC1G_12779																		0
CC_OL_005_N13	CC_G_06542	CC1G_09790																		0
CC_OL_005_N14	CC_G_05278	CC1G_07906																		0
CC_OL_005_N15	CC_G_03059	CC1G_02366
CC_OL_005_N16	CC_G_03207	CC1G_09964																		0
CC_OL_005_N17	CC_G_01317
CC_OL_005_N18	CC_G_08549	CC1G_09225																		0
CC_OL_005_N19	CC_G_01567	CC1G_09071																		0
CC_OL_005_N20	CC_G_06735	CC1G_13046																		0
CC_OL_005_N21	CC_G_11130	CC1G_08668								1				1	YOL138C		Putative protein of unknown function; may interact with ribosomes, based on co-purification experiments; null mutation suppresses cdc13-1 temperature sensitivity			0
CC_OL_005_N22	CC_G_09804	CC1G_07305																		0
CC_OL_005_N23	CC_G_00559	CC1G_01811
CC_OL_005_N24	CC_G_05986	CC1G_04656																		0
CC_OL_005_O01	CC_G_04095	CC1G_11177
CC_OL_005_O02	CC_G_06326	CC1G_03664																		8
CC_OL_005_O03	CC_G_05994	CC1G_04672
CC_OL_005_O04	CC_G_03362	CC1G_05233																		5
CC_OL_005_O05	CC_G_07138	CC1G_09620
CC_OL_005_O06	CC_G_00759	CC1G_08592																		9
CC_OL_005_O07	CC_G_03036	CC1G_02309									1									5
CC_OL_005_O08	CC_G_08861
CC_OL_005_O09	CC_G_06208	CC1G_06274
CC_OL_005_O10	CC_G_07833	CC1G_07110																		0
CC_OL_005_O11	CC_G_06010	CC1G_03173																		0
CC_OL_005_O12	CC_G_09174	CC1G_12645																		0
CC_OL_005_O13	CC_G_02858	CC1G_10809																		4
CC_OL_005_O14	CC_G_01257	CC1G_08971
CC_OL_005_O15	CC_G_02918	CC1G_09668																		0
CC_OL_005_O16	CC_G_09776	CC1G_07727													YDR381W	YRA1	Nuclear protein that binds to RNA and to Mex67p, required for export of poly(A)+ mRNA from the nucleus; member of the REF (RNA and export factor binding proteins) family; another family member, Yra2p, can substitute for Yra1p function			0
CC_OL_005_O17	CC_G_05713	CC1G_10197																		0
CC_OL_005_O18	CC_G_11475	CC1G_06660																		0
CC_OL_005_O19	CC_G_06269	CC1G_03771																		0
CC_OL_005_O20	CC_G_04947	CC1G_10054																		0
CC_OL_005_O21	CC_G_02542	CC1G_00314													YMR053C	STB2	Protein that interacts with Sin3p in a two-hybrid assay and is part of a large protein complex with Sin3p and Stb1p			7
CC_OL_005_O22	CC_G_05090	CC1G_05449																		3
CC_OL_005_O23	CC_G_00728	CC1G_11468																		0
CC_OL_005_O24	CC_G_09367	CC1G_10470																		3
CC_OL_005_P01	CC_G_01344	CC1G_00702													YDR262W		Putative protein of unknown function; green fluorescent protein (GFP)-fusion protein localizes to the vacuole and is induced in response to the DNA-damaging agent MMS; gene expression increases in response to Zymoliase treatment			0
CC_OL_005_P02	CC_G_07469	CC1G_13074																		0
CC_OL_005_P03	CC_G_04550	CC1G_02775																		0
CC_OL_005_P04	CC_G_08980	CC1G_10650																		2
CC_OL_005_P05	CC_G_08085	CC1G_08346													YJL207C	LAA1	AP-1 accessory protein; colocalizes with clathrin to the late-Golgi apparatus; involved in TGN-endosome transport; physically interacts with AP-1; similar to the mammalian p200; may interact with ribosomes; YJL207C is a non-essential gene			0
CC_OL_005_P06	CC_G_03315	CC1G_05278
CC_OL_005_P07	CC_G_00126	CC1G_08657																		0
CC_OL_005_P08	CC_G_06263	CC1G_12456																		0
CC_OL_005_P09	CC_G_06154	CC1G_12794																		0
CC_OL_005_P10	CC_G_01729	CC1G_04392													YJL024C	APS3	Small subunit of the clathrin-associated adaptor complex AP-3, which is involved in vacuolar protein sorting; related to the sigma subunit of the mammalian clathrin AP-3 complex; suppressor of loss of casein kinase 1 function			0
CC_OL_005_P11	CC_G_12353	CC1G_01566																		0
CC_OL_005_P12	CC_G_11004
CC_OL_005_P13	CC_G_10375	CC1G_06185																		8
CC_OL_005_P14	CC_G_11290	CC1G_04506
CC_OL_005_P15	CC_G_09686	CC1G_12088
CC_OL_005_P16	CC_G_02605	CC1G_00427								1					YDR313C	PIB1	RING-type ubiquitin ligase of the endosomal and vacuolar membranes, binds phosphatidylinositol(3)-phosphate; contains a FYVE finger domain
CC_OL_005_P17	CC_G_00120	CC1G_08644													YHR001W	OSH7	Member of an oxysterol-binding protein family with seven members in S. cerevisiae; family members have overlapping, redundant functions in sterol metabolism and collectively perform a function essential for viability			0
CC_OL_005_P18	CC_G_00894	CC1G_11450
CC_OL_005_P19	CC_G_10761	CC1G_08834																		0
CC_OL_005_P20	CC_G_00289	CC1G_01005																		0
CC_OL_005_P21	CC_G_06200	CC1G_06263																		0
CC_OL_005_P22	CC_G_05132	CC1G_05543																		0
CC_OL_005_P23	CC_G_05019	CC1G_09516
CC_OL_005_P24	CC_G_02026	CC1G_01300																		0
CC_OL_006_A01	CC_G_02766	CC1G_06821													YOL011W	PLB3	Phospholipase B (lysophospholipase) involved in phospholipid metabolism; hydrolyzes phosphatidylinositol and phosphatidylserine and displays transacylase activity in vitro			0
CC_OL_006_A02	CC_G_11267	CC1G_04456
CC_OL_006_A03	CC_G_12503	CC1G_10306													YJL166W	QCR8	Subunit 8 of ubiquinol cytochrome-c reductase complex, which is a component of the mitochondrial inner membrane electron transport chain; oriented facing the intermembrane space; expression is regulated by Abf1p and Cpf1p
CC_OL_006_A04	CC_G_04676	CC1G_04918																		0
CC_OL_006_A05
CC_OL_006_A06	blank
CC_OL_006_A07
CC_OL_006_A08	CC_G_10966	CC1G_04161
CC_OL_006_A09	CC_G_11353	CC1G_12985																		0
CC_OL_006_A10	CC_G_03695	CC1G_03525																		0
CC_OL_006_A11	CC_G_12371	CC1G_01527																		0
CC_OL_006_A12	CC_G_07671	CC1G_02173																		0	CoH7
CC_OL_006_A13	CC_G_06206
CC_OL_006_A14	CC_G_02171	CC1G_00466																		1
CC_OL_006_A15	CC_G_06214	CC1G_06280													YKL022C	CDC16	Subunit of the anaphase-promoting complex/cyclosome (APC/C), which is a ubiquitin-protein ligase required for degradation of anaphase inhibitors, including mitotic cyclins, during the metaphase/anaphase transition; required for sporulation			0
CC_OL_006_A16	CC_G_01711	CC1G_04432													YBL049W	MOH1	Protein of unknown function, has homology to kinase Snf7p; not required for growth on nonfermentable carbon sources; essential for viability in stationary phase			7
CC_OL_006_A17	CC_G_08006
CC_OL_006_A18	CC_G_11768	CC1G_06093																		0
CC_OL_006_A19	CC_G_05583	CC1G_07614																		9
CC_OL_006_A20	CC_G_07778	CC1G_04991													YDR527W	RBA50	Protein involved in transcription; interacts with RNA polymerase II subunits Rpb2p, Rpb3, and Rpb11p; has similarity to human RPAP1			0
CC_OL_006_A21	CC_G_11012	CC1G_04058								1										8
CC_OL_006_A22	CC_G_10086
CC_OL_006_A23	CC_G_09672	CC1G_11620																		0
CC_OL_006_A24	CC_G_02094	CC1G_01344																		0
CC_OL_006_B01	CC_G_06107	CC1G_03107																		0
CC_OL_006_B02	CC_G_10722	CC1G_09571																		0
CC_OL_006_B03		CC1G_02133																		3	phb2.3_B43
CC_OL_006_B04	CC_G_00031	CC1G_07823																		0
CC_OL_006_B05	CC_G_04739	CC1G_04859																		0
CC_OL_006_B06	CC_G_00066	CC1G_07864							1											3
CC_OL_006_B07	CC_G_00633	CC1G_07142																		0
CC_OL_006_B08	CC_G_01675	CC1G_11225																		0
CC_OL_006_B09	CC_G_03454	CC1G_10692													YOL115W	PAP2	Catalytic subunit of TRAMP, a nuclear poly (A) polymerase complex involved in RNA quality control; catalyzes polyadenylation of unmodified tRNAs, and snoRNA and rRNA precursors; has 5'-dRP lyase activity; disputed role as a DNA polymerase			0
CC_OL_006_B10	CC_G_10460	CC1G_06939								1					YHR168W	MTG2	Putative GTPase, member of the Obg family; peripheral protein of the mitochondrial inner membrane that associates with the large ribosomal subunit; required for mitochondrial translation, possibly via a role in ribosome assembly			0
CC_OL_006_B11	CC_G_10744	CC1G_08872																		0
CC_OL_006_B12	CC_G_10155	CC1G_09977																		0
CC_OL_006_B13	CC_G_02497	CC1G_00224													YML092C	PRE8	Alpha 2 subunit of the 20S proteasome
CC_OL_006_B14	CC_G_07751	CC1G_04975													YIL007C	NAS2	Protein with similarity to the p27 subunit of mammalian proteasome modulator; not essential; interacts with Rpn4p			5
CC_OL_006_B15	CC_G_06888	CC1G_01971							1
CC_OL_006_B16	CC_G_10704	CC1G_09550													YLR191W	PEX13	Integral peroxisomal membrane required for the translocation of peroxisomal matrix proteins, interacts with the PTS1 signal recognition factor Pex5p and the PTS2 signal recognition factor Pex7p, forms a complex with Pex14p and Pex17p			7
CC_OL_006_B17	CC_G_08138	CC1G_09858													YJL033W	HCA4	Putative nucleolar DEAD box RNA helicase; high-copy number suppression of a U14 snoRNA processing mutant suggests an involvement in 18S rRNA synthesis			3
CC_OL_006_B18	CC_G_01098	CC1G_03212																		0
CC_OL_006_B19	CC_G_01092	CC1G_03199
CC_OL_006_B20	CC_G_10514	CC1G_09885													YGL022W	STT3	Subunit of the oligosaccharyltransferase complex of the ER lumen, which catalyzes asparagine-linked glycosylation of newly synthesized proteins; forms a subcomplex with Ost3p and Ost4p and is directly involved in catalysis			0
CC_OL_006_B21	CC_G_04912
CC_OL_006_B22	CC_G_08582	CC1G_12430																		0
CC_OL_006_B23	CC_G_09419	CC1G_07636
CC_OL_006_B24	CC_G_06611	CC1G_11065													YDR434W	GPI17	Transmembrane protein subunit of the glycosylphosphatidylinositol transamidase complex that adds GPIs to newly synthesized proteins; human PIG-Sp homolog			0
CC_OL_006_C01	CC_G_01323	CC1G_00731																		0
CC_OL_006_C02	CC_G_12134	CC1G_00784																		0
CC_OL_006_C03	CC_G_00874	CC1G_07550																		0
CC_OL_006_C04	CC_G_06948	CC1G_10356																		0
CC_OL_006_C05	CC_G_06342	CC1G_03626													YOL147C	PEX11	Peroxisomal membrane protein required for peroxisome proliferation and medium-chain fatty acid oxidation, most abundant protein in the peroxisomal membrane, regulated by Adr1p and Pip2p-Oaf1p, promoter contains ORE and UAS1-like elements
CC_OL_006_C06	CC_G_10369	CC1G_06169																		4
CC_OL_006_C07	CC_G_05077	CC1G_05465									1									0
CC_OL_006_C08	CC_G_08739	CC1G_06468																		0
CC_OL_006_C09	CC_G_01141	CC1G_03292																		0
CC_OL_006_C10	CC_G_10506	CC1G_06976																		0
CC_OL_006_C11	CC_G_05153	CC1G_12917
CC_OL_006_C12	CC_G_11308	CC1G_04545																		0
CC_OL_006_C13	CC_G_04604	CC1G_02832
CC_OL_006_C14	CC_G_01377	CC1G_00609																		0
CC_OL_006_C15	CC_G_06659	CC1G_05807																		0
CC_OL_006_C16	CC_G_02533	CC1G_00297													YJL002C	OST1	Alpha subunit of the oligosaccharyltransferase complex of the ER lumen, which catalyzes asparagine-linked glycosylation of newly synthesized proteins			2
CC_OL_006_C17	CC_G_00615	CC1G_07127																		0
CC_OL_006_C18	CC_G_07234	CC1G_12987																		0
CC_OL_006_C19	CC_G_07962	CC1G_06733																		0
CC_OL_006_C20	CC_G_04602	CC1G_02825
CC_OL_006_C21	CC_G_04946	CC1G_10053																		0
CC_OL_006_C22	CC_G_06742	CC1G_12292								1					YCR002C	CDC10	Component of the septin ring of the mother-bud neck that is required for cytokinesis; septins recruit proteins to the neck and can act as a barrier to diffusion at the membrane, and they comprise the 10nm filaments seen with EM			7
CC_OL_006_C23	CC_G_01723	CC1G_04404																		0
CC_OL_006_C24	CC_G_04585	CC1G_02778																		0
CC_OL_006_D01	CC_G_08118	CC1G_08353								1					YGR100W	MDR1	Cytoplasmic GTPase-activating protein for Ypt/Rab transport GTPases Ypt6p, Ypt31p and Sec4p; involved in recycling of internalized proteins and regulation of Golgi secretory function
CC_OL_006_D02	CC_G_00058	CC1G_07851
CC_OL_006_D03	CC_G_10117	CC1G_09386																		0
CC_OL_006_D04	CC_G_06869	CC1G_01925																		0
CC_OL_006_D05	CC_G_11925	CC1G_08144													YBL080C	PET112	Protein required for mitochondrial translation; mutation is functionally complemented by a Bacillus subtilis ortholog			2
[truncated: 11,443 more rows]
