# Supplementary material for: Global Gene Expression in Coprinopsis cinerea Meiotic Mutants Reflects Checkpoint Arrest
Source: Oxford University Press journal article supplement (doi:10.1534/g3.112.003046), 2012-10-01
Supplement: 1213_tables2.xlsx [file 1213_tables2.xlsx]

## Sheet: Sheet1
Supplemental Table 2 Differential expression in msh5-22
The table indicates whether or not each C. cinerea probe has significantly higher or lower transcript abundance in msh5-22 than in wild type (FDR 5%) at each time point and in the time-course analysis. The cluster (Burns et al. 2010) and S. cerevisiae ortholog of each gene are also given. For genes with multiple S. cerevisiae orthologs, only one is listed. Gene predictions and oligo sequences are…
Probe ID	Gene Prediction	up at K-3	down at K-3	up at K	down at K	up at K+3	down at K+3	up at K+6	down at K+6	up at K+9	down at K+9	up at K+12	down at K+12	up over time course	down over time course	Scer name	Scer gene	Scer function			Cluster	C. cinerea Genes	Oligo Sequence
CC_OL_001_A01	blank																						0
CC_OL_001_A02	CC1G_02843											+											CATTCAACCACGCATTCCTCCTCGGTTAACTCCACAAATGTATTTTAGTTACAATTGTATTTCTTAAAGT
CC_OL_001_A03	CC1G_06281		+		+											YMR260C	TIF11	Translation initiation factor eIF1A, essential protein that forms a complex with Sui1p (eIF1) and the 40S ribosomal subunit and scans for the start codon; C-terminus associates with Fun12p (eIF5B); N terminus interacts with eIF2 and eIF3					TATGGCTTGTCACGATGGACACACCGTACACAGGAAGGACGAGGTAGAAGTTTGGTTGCACGAATCGTCA
CC_OL_001_A04	CC1G_01746		+										+										CTGCGACGTCGATTAAATAGAAAAGATAGCGGAAGTGGGTGTAGAGTATAGCGGTAATTCTACATTATAC
CC_OL_001_A05	CC1G_03575												+		+	YDR225W	HTA1	Histone H2A, core histone protein required for chromatin assembly and chromosome function; one of two nearly identical subtypes (see also HTA2); DNA damage-dependent phosphorylation by Mec1p facilitates DNA repair; acetylated by Nat4p					GTAGGAGCTGGTGCCCCAGTTTATCTTGCTGCCGTTCTTGAATACCTCGCTGCTGAGATTCTCGAGTTGG
CC_OL_001_A06	CC1G_10838															YLR229C	CDC42	Small rho-like GTPase, essential for establishment and maintenance of cell polarity; mutants have defects in the organization of actin and septins					CTGGAGCCGCCGATTGTCCCAAGGAAGAAAAATAAGTGCAACGTCCTCTGATGATGAACCCTCTTTCCGC
CC_OL_001_A07	CC1G_10511												+		+								TGAACATAGATCCCTGCGACCCGTCCCCGTTACTCTTACGCAACTTCTATCCTCGTTCTTCGATATACCG
CC_OL_001_A08	CC1G_08613															YCR036W	RBK1	Putative ribokinase			0		GTTGTTGAGGAAGTGTAATTTGGCTGCTGGAATGTCGGTGGAGAAACCGGGGACTATTGATAGCATCCCC
CC_OL_001_A09	CC1G_02269																						AAGGTGGTGGTTTTCTAACCAGGGGATGTTTGATCGTGACAGTGGCTGTTGGGGATGGCTTCTGTTCTTG
CC_OL_001_A10	CC1G_01764															YDR058C	TGL2	Protein with lipolytic activity towards triacylglycerols and diacylglycerols when expressed in E. coli; role in yeast lipid degradation is unclear			0		TCTCGTTGGCTGGATCAACGAAGCGAGATACAAATGGGCAGAGATCATGGGCAAGGAGATCAAGTTCAGG
CC_OL_001_A11	CC1G_02270															YGR135W	PRE9	Alpha 3 subunit of the 20S proteasome, the only nonessential 20S subunit; may be replaced by the alpha 4 subunit (Pre6p) under stress conditions to create a more active proteasomal isoform			5		AACCTGCATCGGCGCCAACAACGGCACCGCCCAAAGTCTACTCAAGCAAGAGTACAAAGACGATATTGTG
CC_OL_001_A12	CC1G_03340						+																GAGGTTACTTCTACGGTCTCGGACTAAATCTACTTCCCTCTCTATCGTCAATGCTACGCGTGAGGATGTC
CC_OL_001_A13	CC1G_05058	+													+	YDR353W	TRR1	Cytoplasmic thioredoxin reductase, key regulatory enzyme that determines the redox state of the thioredoxin system, which acts as a disulfide reductase system and protects cells against both oxidative and reductive stress					TCTAGTTTATCGCGAGTCGTTTCCTCGGGTATACGCTTCTGCCGTCTGTATTCAGCGAAGTCAGATGCCT
CC_OL_001_A14	CC1G_11987															YKL170W	MRPL38	Mitochondrial ribosomal protein of the large subunit; appears as two protein spots (YmL34 and YmL38) on two-dimensional SDS gels			4		ATCGACAATTCGGGTGCCCTCCTCGTCGAGTGCATTAACGTTCTGAAGAACAAAGTGACCAACGGTCACG
CC_OL_001_A15	CC1G_15333															YCL045C		Protein of unknown function; green fluorescent protein (GFP)-fusion protein localizes to the ER; interacts with Gal80p; YCL045C is not an essential gene			0		TTGTTTCGGTGGAGTTTTATGAAGGCGGTGGGGTTGATGAGAAGACTAGGAGCTCGGATATGTCCGCCTA
CC_OL_001_A16	CC1G_01230		+																				GTAACTCGGACTATGTGCACATAGCTGTTCTGTTTTGATACGTTGTTGCCGTTTGAATGACATCGCTGTT
CC_OL_001_A17	CC1G_06306																				0		GGTGTCCCTGCGACCCCAGAAGCTACCGAAGAACTGAGTGAGAAGATTGGATTTATCCGCGAAACTCAAT
CC_OL_001_A18	CC1G_07740																						AGACATACAAGGAGGTTTATTCAAACCCGAACCTTACTCTCTGGTCCGATTCTGGCCAGCCTTGGCCCAA
CC_OL_001_A19	CC1G_10036															YLR242C	ARV1	Protein functioning in transport of glycosylphosphatidylinositol intermediates into the ER lumen; required for normal intracellular sterol distribution and for sphingolipid metabolism; similar to Nup120p and C. elegans R05H5.5 protein			0		GGCATATCCAACGTCCACACAAGCAACCCTCTCACCGACTTGGCTTGAAGCATTGTTTCCTAACAGCGTT
CC_OL_001_A20	CC1G_06529													+									GTTGCTCTAAATAAAAGATTCTCTGCCGTCGTCTAGCTTGTAACTAGATTTCAATTGAACATGTTGTGGC
CC_OL_001_A21	CC1G_00324																						GCGGATACTCAAGGATCTGCTATCAGGCCGAAAAATCAATTCGTGAGGTCTTGAAAAACGATACCAACGT
CC_OL_001_A22	CC1G_04388												+		+								CAGTTGTACCTGTCCTAGCTACGCTATACACACACGCTTGCATTCTCGCTCAAATCGTCAACGCCCACAT
CC_OL_001_A23	CC1G_12016																						CGCCAACGGTTAGAGCAAACTCAGACAACATCGGAGGAAGCATCATAGTACGGACATTGTCCCCAGGATA
CC_OL_001_A24	CC1G_12573												+		+								GGCCATGGGGCTCGACCGGAATGTGATTCGATAAACGATAGGAGCTTGTCCGTGTCTGGTGAAAGAATAT
CC_OL_001_B01	CC1G_01379															YER072W	VTC1	Vacuolar transporter chaperon (VTC) involved in distributing V-ATPase and other membrane proteins; together with other VTC proteins, forms a heterotetrameric complex that associates with the SNARE Nyv1p and the V0 sector of the V-ATPase					TTTCTTCGGGGAAGGCCTCCATCGTTCGGATTCATTCAGGGAGGTGGGCCGAACACTATCATTGTTTTCT
CC_OL_001_B02	CC1G_12266																						GAGGACGACTACAACGCTCGGGAGGGTGTTTATGATGGACGTCGGGGAGTAAAGATTTTCTAGTTTCGCT
CC_OL_001_B03	CC1G_01957																				0		TCTTCAAGGAGAGTTTGTTATCTGGGGAACACAAGCAATTTGCACTTCGCGTTTGGGAGAAGGCCCGCAC
CC_OL_001_B04	CC1G_03728															YLR022C	SDO1	Essential protein involved in 60S ribosome maturation; ortholog of the human protein (SBDS) responsible for autosomal recessive Shwachman-Bodian-Diamond Syndrome; highly conserved across archae and eukaryotes			3		GAGGCTGGGTTTAGTGTCAAACCTGGAAAGACAGCGAAGAGCCAAGTCACCGAATGCATAAAGCTTCTGC
CC_OL_001_B05	CC1G_03550																						CCACAGGCATGATATGCCTGTATACGTCTGGGCATAACCCATCGGAATTCGTTGCTCGGATCGTCCAAGG
CC_OL_001_B06	CC1G_10249																				0		ATTGCGTCGTAACGACCAAAGAGAACACAACCTTCCACTTCCTCAAGCGCTACACCGCATTCGAAGACCT
CC_OL_001_B07	CC1G_03774															YGL171W	ROK1	ATP-dependent RNA helicase of the DEAD box family; required for 18S rRNA synthesis			3		CAAAACTCTCGCATATCTCCTGCCTCTATTTGCACGACTCGGTGCTCCACTTCATCAAACACACGACCAG
CC_OL_001_B08	CC1G_06416															YLR066W	SPC3	Subunit of signal peptidase complex (Spc1p, Spc2p, Spc3p, Sec11p), which catalyzes cleavage of N-terminal signal sequences of proteins targeted to the secretory pathway; homologous to mammalian SPC22/23					TAACGTCGTTGGAAAGAACAAATACAACTTCCGCGAACTTTCGACCACTTTCAAAAACATCGCGGCTGCC
CC_OL_001_B09	CC1G_03669																						TAATCATATTTGCAGTACCACTACAAGCGACGAACCACGGCTGTCCACCGTCCTGGCGAAAGCTTGATGT
CC_OL_001_B10	CC1G_03564																				0		GGTTCAACATTTCACCTCCTCTTGACAAGTCTGGCAAGCCCATCAAGCTTAAGAACGAGCGGGTAGGAAC
CC_OL_001_B11	CC1G_05756										+		+		+								GGCGCATAGATTCCTTGTCACTTGTATCATTATTTGCTGTCATCACATTGTACTAGTACTGTATTTTTAG
CC_OL_001_B12	CC1G_01098															YPL111W	CAR1	Arginase, responsible for arginine degradation, expression responds to both induction by arginine and nitrogen catabolite repression; disruption enhances freeze tolerance			9		TTGTTGAAGAATGATTCCCTGGTTTACATTGGCCTTCGGGATGTTGACCCCGGAGAGAAAGCCATCCTGC
CC_OL_001_B13	CC1G_08103															YER174C	GRX4	Hydroperoxide and superoxide-radical responsive glutathione-dependent oxidoreductase; monothiol glutaredoxin subfamily member along with Grx3p and Grx5p; protects cells from oxidative damage			0		GGACCTGAACCGGGTGTCTGTTCTCAACTTTTGGGCACCGTTTGCTGATCCGTGCAAGCAGATGAACGAG
CC_OL_001_B14	CC1G_07515		+					+													7		TAAGAATTACTTCAATTTCACGCATGAGCTGGGTCCTAACCCCTTCGAGTTTTGCCCGTCGCATGGCGAG
CC_OL_001_B15	CC1G_00209															YDR373W	FRQ1	N-myristoylated calcium-binding protein that may have a role in intracellular signaling through its regulation of the phosphatidylinositol 4-kinase Pik1p; member of the recoverin/frequenin branch of the EF-hand superfamily					ATCACTTACGACGAGATGCTGCAAATCGTGCAATCCATCTACAAGATGACGGGCGAGATGCGTGTCGACA
CC_OL_001_B16	CC1G_10928												+		+	YBR025C	OLA1	P-loop ATPase with similarity to human OLA1 and bacterial YchF; identified as specifically interacting with the proteasome; protein levels are induced by hydrogen peroxide			3		AGAACAAGTTTGTCTGTGGTGAAATCATGTCCTATGACGATCTCCGCGAGCACGGTAGCGAAGCAGCCGT
CC_OL_001_B17	CC1G_00946												+			YNR035C	ARC35	Subunit of the ARP2/3 complex, which is required for the motility and integrity of cortical actin patches; required for cortical localization of calmodulin					CGAACGTAAGACCGTTAGTGGTAGGACTATGGTTTCTCGATGAGGAGCCGATTAGCATGTACACCCCAAG
CC_OL_001_B18	CC1G_15553																				0		ACAAGTTGAAAGTAGATGCGACTGTCGAGGACCGTATTCTTGCTCTCCAAGACAAGAAGCGCGCTTTGGC
CC_OL_001_B19	CC1G_01784															YOL059W	GPD2	NAD-dependent glycerol 3-phosphate dehydrogenase, homolog of Gpd1p, expression is controlled by an oxygen-independent signaling pathway required to regulate metabolism under anoxic conditions; located in cytosol and mitochondria			0		TTGGATACCGTTTGGGTAAGGGTGAATCCCTGGATGTGATTATGAAGACCTTGGGCAGTGTTGCCGAAGG
CC_OL_001_B20	CC1G_00319															YEL012W	UBC8	Ubiquitin-conjugating enzyme that negatively regulates gluconeogenesis by mediating the glucose-induced ubiquitination of fructose-1,6-bisphosphatase (FBPase); cytoplasmic enzyme that catalyzes the ubiquitination of histones in vitro			0		TCATGTCTGACTTTGAGGTCAACCTGGTGAACGATAACATGCAGGAGTTCTGCGTGCGCTTTTACGGACC
CC_OL_001_B21	CC1G_09834																						TCTCAAAAAACGTACATACTGCTTCCCCCTAGCATAATCGATCCCCATAGAATACTCCGCCCGCGTTGGC
CC_OL_001_B22	CC1G_01434																				0		TCCCGGTGTTTTTGCTTACAGGCTTCATTGGATTCGACGGGGAGTGGTAAGCGTAGACTATTGTGTAGCC
CC_OL_001_B23	CC1G_10542																						CTTTGGCAAGCACAACCACGGCGCTATGGGTGTCGTGACACGAACTGGCGGAACCATTGGATTCTTCGCT
CC_OL_001_B24	CC1G_11930																						AGAACCCGCCTGCTTCGACAACCTGATTCGTGTATGCGGCGCTTGCTTGTGTGCTATCCCACTGACTTGT
CC_OL_001_C01	CC1G_04678																				0		ACACACGAAGTCTGTACGACGCTTTTAGGGGCCTTCAAGATCCCACTATGTCTGCTATCACTCGTCCTCA
CC_OL_001_C02	CC1G_14191															YOR223W		Putative protein of unknown function			3		TCAACAAGGGTAAGAGGCTGCGGACTTGATGTATTACCGTAGGACGTAAGACAATTGTATTATGAATCGA
CC_OL_001_C03	CC1G_08573																						GCCCTTGAATGGTTGTAACTGGGTTTATGGATAATGGACATTAGGGGGCCGTATTCTGGTGTCAATGTCA
CC_OL_001_C04	CC1G_03855															YKL067W	YNK1	Nucleoside diphosphate kinase, catalyzes the transfer of gamma phosphates from nucleoside triphosphates, usually ATP, to nucleoside diphosphates by a mechanism that involves formation of an autophosphorylated enzyme intermediate			0		TTGAGAACGCCGAGAAGGAAATTGCCCTCTGGTTCCCCGAGGGTGTTGTTCAATACACCAGCGTCGCTGA
CC_OL_001_C05	CC1G_02182																						GGTGATTATATTAACGGGTTCAAGATAACAAGTAGTTAGGGCCATGTTACTTAGTCTGGGTTCGCGGCGG
CC_OL_001_C06	CC1G_08748														+						0		GTGGAGACTAGTGCGAAGCATGGGATCAACGTCAGCAAGGTTTTCGAGTTGTGTTTGCAGGAAATCGAGA
CC_OL_001_C07	CC1G_06725												+		+	YMR121C	RPL15B	Protein component of the large (60S) ribosomal subunit, nearly identical to Rpl15Ap and has similarity to rat L15 ribosomal protein; binds to 5.8 S rRNA					GGCACAACACCCTCAGCTTGCGTCGATACCGATAAGCGAATCGCACTCCACCTCTCTTCATTTTTGTACT
CC_OL_001_C08	CC1G_03506												+		+						0		GACGGAGCTACGAAAATTAGTCTCATTCGAGGCAAAGGTTATGCGAGGTTCTTACAGGGCGTTGCGGCAT
CC_OL_001_C09	CC1G_02516																						TTGTATGTACCTGGAGCGCTATATCTTCCTCCTCACTGTCCCGAGTCCCAAACCAATCGTCAGAGCCAAT
CC_OL_001_C10	CC1G_10100																						AACCGTGGATGTGCGGACTACCTAGAGGTCTGGTTTCTTTGGATTGGAAGGAACAGGCGTCGTTGAAGTA
CC_OL_001_C11	CC1G_12051																						CAATCCAGCGCACTCGAATGGAAGGGTATGACCCAAGTACCATGGAACGGTGGTATCATCGGCCTGTTAT
CC_OL_001_C12	CC1G_00735	+																					CGTGTCCCTCAACAACAGCTCCGCCAACCTTTAGTCGCATATTGACAATGCTTGCATTTCCTGAACGAGG
CC_OL_001_C13	CC1G_13586																				0		ACGCTACCGTCGCCAAGTTCGGCAAGATCAACCACATCGTGAACAACGCCGGCTTCACCTACGACAAGAT
CC_OL_001_C14	CC1G_11778																					redA	GGAGGTCGCTGAAGTAACATCCTCATCCCTGTATAGTATGGTACGCGCTCGTTTGAGGACTAAGGAATCG
CC_OL_001_C15	CC1G_06717																						ACATCCCATGTCCTTGTATGCCCGTTATGAAATATGCCTCGAAACCTCCGCGCTTCTTATCAGCCGTTCC
CC_OL_001_C16	CC1G_08799																						CCCTTCCCTTGTATCACACACAGGCTGTTGTAATCACGGTCCCCGTTGGCATTTCCTCTACGCTTCATCT
CC_OL_001_C17	CC1G_04355															YBR084C					4		AACCTTGCCTCCAAGCGAAAAGGTCGCCACACTGGTACCGGTAAGCGAAAGGGTACCGCCGACGCTCGTT
CC_OL_001_C18	CC1G_02346														+								TCGTCTTCGTGACACAGCTCATCTCGTGGATTGGGCAGAACGTCTTACTAGAATGGGCCTACAACCTCTA
CC_OL_001_C19	CC1G_12415																						TGCCATCGCTGCCGCCGCCATCCTTCTTTAAGAAGTCCCAGTCTAGTCCTTCAAAATATACCTGTGATGC
CC_OL_001_C20	CC1G_04396										+		+		+						2		GCTCCCCTTCCAACGTCTTGTTCGTGAAATCGCGCAGGATTTCAAGACTGACCTCCGCTTCCAATCCTCT
CC_OL_001_C21	CC1G_02181																						TGGCGTTGCATTACTAGGGTTCTGTAGTTGTGTAGCTTATATGTTCCGTGAATCGAAGACCTACCCCTCG
CC_OL_001_C22	CC1G_05005																				3	cglII	GTCATCGACCACGGCGACAGGTTCCAGATCCGCTTCGACTATGGGACTTCCATTTATTATAACAAGAGGA
CC_OL_001_C23	CC1G_08572																						GCGTGCTTAAGCGCCCAGTTTGATTTGTACTTCTAGATCGTCACTTTTGTAGCATACCATCGACACCCCA
CC_OL_001_C24	CC1G_10341																						GTGGTGGATTGGCGGAGACTTCGAAAGCCGGTATCGCATTCCAGGGGTAGACTTTATCGTACATTTCATG
CC_OL_001_D01	CC1G_02388																						CGGCTGCACAGGTTAAGATGGCTGGGTTCCCTAATAACAAGCAGCCTAATTCGTCAAAGGTACACAACAA
CC_OL_001_D02	CC1G_14840															YNL079C	TPM1	Major isoform of tropomyosin; binds to and stabilizes actin cables and filaments, which direct polarized cell growth and the distribution of several organelles; acetylated by the NatB complex and acetylated form binds actin most efficiently			0		CAACTCGTTGAGGGTGCGATTGGAGCGCGCCGAGGCTGAGGTGGACGACACCAGGACCCAGCTCGACCAT
CC_OL_001_D03	CC1G_09529																						GACCTGTGGTTCTCTTTGATGCTGTGTATGTCGTGTTTGAATGGAATTGGGCGCAGAACCGCTACACTGT
CC_OL_001_D04	CC1G_07540														+	YER056C	FCY2	Purine-cytosine permease, mediates purine (adenine, guanine, and hypoxanthine) and cytosine accumulation					CCGCACGCAAGTAAACGTGTGCTCTTTATTCATGCTTTCTGTACCACCCATTCTCCCATGTATTCGATTC
CC_OL_001_D05	CC1G_06424															YPL222W		Putative protein of unknown function; the authentic, non-tagged protein is detected in highly purified mitochondria in high-throughput studies			0		GGACATCATGGAGGGCTACGGTCTTGATTTCCACTCCACATTTCGCATACTCTCCTCATTCAAGGCGTCA
CC_OL_001_D06	CC1G_03234																				4		CGGCAGTATGTACTTCAATGTGTTTGAAGCTGCTCCGGAGAACGAACGAGATGGCCCGGCTCAGCAAGCA
CC_OL_001_D07	CC1G_07379		+		+																		CAAGGATACCGAGACATGGTAAATGCCCACCCAGCGTGACTCTCTTACTCTACTTCCCAGACGATAATGC
CC_OL_001_D08	CC1G_10547																				4		CGATCTTGACGGTGAAACGAGAGGAATGGTTGAAAAAATGATGCAAATGGGAAAGCCCACTTCCGATGAG
CC_OL_001_D09	CC1G_07331															YNL116W	DMA2	Protein involved in ubiquitin ligation; plays a role in regulating spindle position and orientation; functionally redundant with Dma1p; orthologous to human RNF8 protein, also has sequence similarity to human Chfr.			7		ACTGGGACGAGAGTGGCAAACTACAGCCAATGCTTTCAACACAAGCGCAGTAAAGAGCCTCAAGGCTATC
CC_OL_001_D10	CC1G_00096																						ATTATAAGTATCCGCCTCGTTCTCATATCCACCCATATCTGACTCCCTTTGCACAGAGAGGCACCGCCGG
CC_OL_001_D11	CC1G_14155															YGR215W	RSM27	Mitochondrial ribosomal protein of the small subunit			0		CCAAATACCTCAAGCAAAAGCTACGCGGTCCAGCTATGACCATGTACTACCCTACACGACTCAACATCTC
CC_OL_001_D12	CC1G_08358																				0		CCTGCGAGTAGGGATTCGTGTGTTGACTCGGAGGGCGTGGATTCCATTCATAACTATATGAACTATGCCG
CC_OL_001_D13	CC1G_02887								+														TACGTTGCGTAAGGTGAGATGAGGTGGTTTGTATTACGGCGGCTTCAAAAGCGGGTGCCGAAGGTCAATA
CC_OL_001_D14	CC1G_02801		+			+															0		GGAGGTGCTCTGGGAGTCGTCACGCTGGAAGATATCATTGAGGAAATGATAACAGAAGAGATCGTCGACG
CC_OL_001_D15	CC1G_02768																						TGAGGATATGAGTGGCAAGTCGTTGTTGGCTAAAGATTAGAGGGTTTTCCGGGGGGTGGGGGTTAGAGAT
CC_OL_001_D16	CC1G_02850											+									0		TAACAGACACGTTAAACGCTGCGCCCTCAAGCCTGTCAACATGGCCACCAACAAGTCTTCTCCAGATTCA
CC_OL_001_D17	CC1G_02851															YLR357W	RSC2	Component of the RSC chromatin remodeling complex; required for expression of mid-late sporulation-specific genes; involved in telomere maintenance					TTGCTGTAGAAGCAGGAGGATGTAGTGTTTCGTTAATTTGATGGCACTCCCACCTTCCCTGGGTGGGTCA
CC_OL_001_D18	CC1G_02883		+																				AGCCTAGGATTCAGGAGATTCAGCAAGAGAAACGGACCCAGGTTGAAGCATATCTGGATATGTGTGCGGC
CC_OL_001_D19	CC1G_04419																						TCCTCCTCCGCCTGCCGAAGAGAAAAAGTAGACCACTCCTGTTCCCACCGTTAGAGGCAATATACTATCA
CC_OL_001_D20	CC1G_13602.3																						CCATGGAGCTCCATACTTCCCGTTGACAGTCTCAGACTACCTTTTGGGTCTATCTGACCTCACAGGTGAA
CC_OL_001_D21	CC1G_04382																				0		CGCAGATGTGATAGCAGGTACGCTCCAGTCCTGGTCTGAATGGGTCGTTGTGCTCATTAAAAACTCAGGA
CC_OL_001_D22	CC1G_04334																				0		ACGAAGAAGAGAAAGCTTACTCTGGCTGATGGAAGCGAGTTGGATTTGAACGGCTCCCTTCCCATTACGG
CC_OL_001_D23	CC1G_04344													+		YBR287W		Protein of unknown function; green fluorescent protein (GFP)-fusion protein localizes to the ER; YBR287W is not an essential gene					ATATGCACGCCACCCGTCACCATCATCTACGTCGTTCTTGGACTCTTCCTTGCAAAGCTTTGATCATGGG
CC_OL_001_D24	CC1G_04353															YDR408C	ADE8	Phosphoribosyl-glycinamide transformylase, catalyzes a step in the 'de novo' purine nucleotide biosynthetic pathway					GCTGATGCGAAGCCTGACAGGACATCATCATAGAGATAACGTGTGGGTGGGTTTATCGTTTTCTCCTTTG
CC_OL_001_E01	CC1G_04394															YGR020C	VMA7	Subunit F of the eight-subunit V1 peripheral membrane domain of vacuolar H+-ATPase (V-ATPase), an electrogenic proton pump found throughout the endomembrane system; required for the V1 domain to assemble onto the vacuolar membrane			0		CCCGTGTTAAATAAAGACACTCGCTGACTTGGTTTTAATCCACCACGCACTTGCAGACCCATCCAAAGAT
CC_OL_001_E02	CC1G_04427															YNL330C	RPD3	Histone deacetylase; regulates transcription and silencing; plays a role in regulating Ty1 transposition			4		AAATACGGACGACCTCAATACCCCGGCCTACCTTGATAGAGTGAAGCGGATAGTGTTGGAGAATCTGCGA
CC_OL_001_E03																							GGGAGAATTGAAGCAAGCGCCAGTGGGGTACTAGGAAACAGGAAAACGGAAAGATACTGTGGTGCAAAGG
CC_OL_001_E04	CC1G_13194															YLR142W	PUT1	Proline oxidase, nuclear-encoded mitochondrial protein involved in utilization of proline as sole nitrogen source; PUT1 transcription is induced by Put3p in the presence of proline and the absence of a preferred nitrogen source			8		CGGAGATGGAGCCGCAGCTAGAGAACGACAACGGGCTCTCAGGGAAATTATGACTAGAATTAGGGAAACA
CC_OL_001_E05	CC1G_13220																				3		GGTGGTTAATTCAGTCATTATTGCCGCGCTTTCTAGTACGGCGTTGGTCTTTGCCATGATCGGCCTAAGG
CC_OL_001_E06	CC1G_12192												+		+	YFL005W	SEC4	Secretory vesicle-associated Rab GTPase essential for exocytosis; associates with the exocyst component Sec15p and may regulate polarized delivery of transport vesicles to the exocyst at the plasma membrane					CATACCGCATAATACGTGTTGTATCTTCCCGAGAGCCCTTCCCTAGTGCTGGTTCATTCCATATATCCTA
CC_OL_001_E07	CC1G_13618		+				+				+		+			YPR111W	DBF20	Ser/Thr kinase involved in late nuclear division, one of the mitotic exit network (MEN) proteins; necessary for the execution of cytokinesis					GGCGTAAACCATGTCCACAGATAGGCCCCGCCCACCTTCTCTACAAGTCTGATAGATGTGATCGCATATT
CC_OL_001_E08	CC1G_11223										+		+			YPR028W	YOP1	Membrane protein that interacts with Yip1p to mediate membrane traffic; overexpression results in cell death and accumulation of internal cell membranes; regulates vesicular traffic in stressed cells					TACTTTCCGTCCCTATTAGTCGTTTTGTGAACCTATTCTTCGGGTCTGTTTTCGACTGACACCTTCCACG
CC_OL_001_E09	CC1G_11224																						CCTCAGTCGGATGTACAGCGTTCGGGAAGGGAATAGGGTACACGTAAGGCACCTTGTGCGATTTGATTTT
CC_OL_001_E10	CC1G_10279																				0		TGTAAGTTGTCTTGGTCTTTGTGCAGCGAGCAGGACTGAACGGTTGTTTAGGTCAAGTGCAGCAAGCCCT
CC_OL_001_E11	CC1G_10276															YNL189W	SRP1	Karyopherin alpha homolog, forms a dimer with karyopherin beta Kap95p to mediate import of nuclear proteins, binds the nuclear localization signal of the substrate during import; may also play a role in regulation of protein degradation					GAGTGGATTCAACTTTGGCAATCAGTAGATGCGCCGAGTTTAGTTTGGGTGTTGGTCGTCGTGGACCTAG
CC_OL_001_E12	CC1G_13210		+											+		YBR170C	NPL4	Endoplasmic reticulum and nuclear membrane protein, forms a complex with Cdc48p and Ufd1p that recognizes ubiquitinated proteins in the endoplasmic reticulum and delivers them to the proteasome for degradation					CGGCGGATTTGAACATTGTACTGTAGCCCTTTGCATCGCGGTCTTCCTTCGCACCTCGTGTATTCCAAAA
CC_OL_001_E13	CC1G_10538												+			YER095W	RAD51	Strand exchange protein, forms a helical filament with DNA that searches for homology; involved in the recombinational repair of double-strand breaks in DNA during vegetative growth and meiosis; homolog of Dmc1p and bacterial RecA protein			0	rad51	AGGTTTGGTCTGAACGGAGAAGAGGTTTTGGACAATGTGGCATACGCTCGTGCATACAACGCCGATCATC
CC_OL_001_E14	CC1G_10525																				0		TACCTTAGCTGGAGGTTCATCATTTGGCCTGGTATCATCTATTTCGGAGAGCGGGTGTGGCGTGAAATCC
CC_OL_001_E15	CC1G_10519										+		+										AAAGGTCGGGTGGCTTGTTGGTCGGAGCCTTCGAAGCTCTATGGATGGACTGTAATGATTTACGAACGTC
CC_OL_001_E16	CC1G_10541																				0		AGAGGGAGTTGGAGGAAGCTCTCAAACGGGGAGGGATCAATTATCGTAAACGGCAACGGCAGTTACAAGA
CC_OL_001_E17	CC1G_13637		+													YEL058W	PCM1	Essential N-acetylglucosamine-phosphate mutase; converts GlcNAc-6-P to GlcNAc-1-P, which is a precursor for the biosynthesis of chitin and for the formation of N-glycosylated mannoproteins and glycosylphosphatidylinositol anchors			0		TGTGTTCCTACCGGAGTTAAGCATCTCCATCACGCAGCCGAACAATTCGACGTTGGTGTGTACTTCGAAG
CC_OL_001_E18	CC1G_12659															YBL050W	SEC17	Peripheral membrane protein required for vesicular transport between ER and Golgi and for the 'priming' step in homotypic vacuole fusion, part of the cis-SNARE complex; has similarity to alpha-SNAP				lse17	TCCTGTGCACGGACATCGTAACCGCGAGGAGGAACGCTCAGAAGTATATCGGACAAGATAACACTTTCGT
CC_OL_001_E19	CC1G_11300		+													YLL026W	HSP104	Heat shock protein that cooperates with Ydj1p (Hsp40) and Ssa1p (Hsp70) to refold and reactivate previously denatured, aggregated proteins; responsive to stresses including: heat, ethanol, and sodium arsenite; involved in [PSI+] propagation			0		ACCTCATGTCCATGGGCTATTCGACGCAATTCGGTGCTCGTCCTCTAAACCGTGCGATTCAGAGTGAATT
CC_OL_001_E20	CC1G_11288												+		+	YDR025W	RPS11A	Protein component of the small (40S) ribosomal subunit; identical to Rps11Bp and has similarity to E. coli S17 and rat S11 ribosomal proteins			4		CACTGGCAACGTCTCTATTCGTGGCCGTATTTTGACTGGCAAGGTTGTGTCTACCAAGATGATCCGAACC
CC_OL_001_E21	CC1G_06762	+											+		+	YOR187W	TUF1	Mitochondrial translation elongation factor Tu; comprises both GTPase and guanine nucleotide exchange factor activities, while these activities are found in separate proteins in S. pombe and humans			0		GCTCTCGAGGAGGGAACTCGATTCACACTCCGTGAGGCTAACAAGACTATTGGAACTGGTATCGTTACCA
CC_OL_001_E22	CC1G_13648															YJR008W		Putative protein of unknown function; expression repressed by inosine and choline in an Opi1p-dependent manner; expression induced by mild heat-stress on a non-fermentable carbon source.			0		TTCTAGACCGCCCGCCAGACTGACCACCGTCTACAGGGGAACACGATTCTCTTACACTTATTATTACCCA
CC_OL_001_E23	CC1G_06740														+	YLR150W	STM1	Protein required for optimal translation under nutrient stress; involved in TOR signaling pathway; binds G4 quadruplex and purine motif triplex nucleic acid; acts with Cdc13p to maintain telomere structure					CACTTTGAAAAGACCGCCGTTTGCTCATGTAGTACATCGTATCGTTACGGTTGTCGATTGTCCTCCACCA
CC_OL_001_E24	CC1G_06743															YAL017W	PSK1	One of two (see also PSK2) PAS domain containing S/T protein kinases; coordinately regulates protein synthesis and carbohydrate metabolism and storage in response to a unknown metabolite that reflects nutritional status			0		AAAAGAGCAAGATGTGTGGGCATTTGGCGTTGTCGCTTATGTTCTCCTCGTGGGCGAGTGTCCATTCATG
CC_OL_001_F01	CC1G_06744																				0		CGTCAACAAGATGGACTCTACTAAGTGGAGCGAGGACCGATTCAACGAAATCGTCAAGGAAACCTCCAGC
CC_OL_001_F02	CC1G_13656											+		+									GCGGTGTTACCTGGCACTGGAACTAGGTTTCCAACCTCGCAATAACCAACCCTCATAGAAACTCGTAACG
CC_OL_001_F03	CC1G_06774																				0		GCAAAGAACCCTGGGACTCCAGGGGGTCAGACGAATATCTTAAAGCCGATGGCAGCAATGATTCCAGATA
CC_OL_001_F04																					0		CGAGTTTCTCTGCCTTTTCGCGAAGGCTTCTGGATGCTTTGGTGGACAGCTGTTGGGCAAGGGCTTCCCT
CC_OL_001_F05	CC1G_06811	+																			3		ATTGGGCCACGAAACTACGTTCAACATTTTCAGAGCACGAGAGCAAATAAGGAGCGACGGCAGCGTCAGT
CC_OL_001_F06	CC1G_03758															YHR025W	THR1	Homoserine kinase, conserved protein required for threonine biosynthesis; expression is regulated by the GCN4-mediated general amino acid control pathway			0		ATATGTCGCCCCGACCATCACCTACACTGGAGAAGGCGCCGACGAGGTCCCCCTGGATGCATACAAAAAC
CC_OL_001_F07	CC1G_03701		+																		0		TTCATCACAAGGTAGCGGACAATGCAACTACCGCACACATTGAAGAAGGGATTCGAATCAAGCCCGTCCC
CC_OL_001_F08	CC1G_03707												+			YGR132C	PHB1	Subunit of the prohibitin complex (Phb1p-Phb2p), a 1.2 MDa ring-shaped inner mitochondrial membrane chaperone that stabilizes newly synthesized proteins; determinant of replicative life span; involved in mitochondrial segregation			2		AACATTTCCACTACGACCGGTTCCAAGGACTTGCAAATGGTGTCTATCACGCTCCGAGTTCTGTCGAGAC
CC_OL_001_F09	CC1G_03708															YNL016W	PUB1	Poly(A)+ RNA-binding protein, abundant mRNP-component protein that binds mRNA and is required for stability of a number of mRNAs; not reported to associate with polyribosomes					CCAGTCACTCCTTACACATCACTGTCGTCTCTCGAACCAACTCTGCATTGTATCGCTTCGTTTTCCCCTC
CC_OL_001_F10	CC1G_03710															YML001W	YPT7	GTPase; GTP-binding protein of the rab family; required for homotypic fusion event in vacuole inheritance, for endosome-endosome fusion, similar to mammalian Rab7			3		TCTACCGTGGAGCCGACTGCTGTGTCCTGGTTTACGATGTGAACAGTGCCAAATCTTTCGAAACTCTCGA
CC_OL_001_F11	CC1G_03730															YKL040C	NFU1	Protein involved in iron metabolism in mitochondria; similar to NifU, which is a protein required for the maturation of the Fe/S clusters of nitrogenase in nitrogen-fixing bacteria			0		CGAGCGGATGCTAATGCATTATGTTCCAGAGGTGAAGGGTGTCGAGCAGATACTGGATGAGGAAGAGCAA
CC_OL_001_F12	CC1G_03733						+		+														GCCCCGTGCCGTGTATTACCGATCCACAACTGTATTCGTATGCGGTCTGAGTACCATTCCTACATCATTG
CC_OL_001_F13	CC1G_01866																						ATTGGTGGAAGGAAAGCACATGGACGCGATTGATACAGCGAGAACTCCCCGATGTATAGACTTGTTGGGC
CC_OL_001_F14	CC1G_01843	+														YMR189W	GCV2	P subunit of the mitochondrial glycine decarboxylase complex, required for the catabolism of glycine to 5,10-methylene-THF; expression is regulated by levels of 5,10-methylene-THF in the cytoplasm					TGCGACTGCCCCTCTGTGGAGGAACTCGCCGACAATTAGATGCTGGCCTCGTAGAACTACTGTAATATTA
CC_OL_001_F15	CC1G_01824															YPL109C		Putative protein of unknown function; the authentic, non-tagged protein is detected in highly purified mitochondria in high-throughput studies			0		CCTAGTGCCAAAGATCTTCCAACGAGCGATCTTGCGGCGTTGTTAAAAGTGTGGGTGTGGATAGAAGCGA
CC_OL_001_F16	CC1G_01679																				4		GGTGACTACAAACGGGTCTACACCACTGGGCCTGAAAAGAGCGAAAATGCCATCGTCTGTGTGTTCGATA
CC_OL_001_F17	CC1G_13680																				0		AAGCAGAGATCCAACTGCTTGCCAGGAGAATCCTTGAATTTGTCGACGGAGATTTGGAAGGCGTTCCGTC
CC_OL_001_F18	CC1G_01666																				0		AAGATGATATTAGGCGCGCAATCCTTGAAGTCATCGACTCCCTCTCCACTCCAGAGCCTTTTACCAAGGC
CC_OL_001_F19	CC1G_01718															YMR089C	YTA12	Component, with Afg3p, of the mitochondrial inner membrane m-AAA protease that mediates degradation of misfolded or unassembled proteins and is also required for correct assembly of mitochondrial enzyme complexes					GACATCCGCGTTCGCGCATTCATAGACTCCCCTTCGATTCTCGCATGCCTCGCTGTATTTTAAGCAATCT
CC_OL_001_F20	CC1G_01740												+			YER136W	GDI1	GDP dissociation inhibitor, regulates vesicle traffic in secretory pathways by regulating the dissociation of GDP from the Sec4/Ypt/rab family of GTP binding proteins			3		TGGAAATCCAACCCGGTCTTAACCTCCTCGGCCCCATTTACGACAAGTTCGTCTCCATCAGCTCTATCTA
CC_OL_001_F21	CC1G_01765														+	YHR158C	KEL1	Protein required for proper cell fusion and cell morphology; functions in a complex with Kel2p to negatively regulate mitotic exit, interacts with Tem1p and Lte1p; localizes to regions of polarized growth; potential Cdc28p substrate			0		CCTCCGTCGCGAAAACGAACAGTTACAACACAAGATCCGTCTACTCCTAGAGGTTGACCAATCGCCATTC
CC_OL_001_F22	CC1G_01770																						AGAGCCGGTCCCTTGGGAGGTGGCCGAACTGTAAAGGCTATGTCGGATATCTATTGAGTGACTTTTCGTT
CC_OL_001_F23	CC1G_01813															YGR112W	SHY1	Mitochondrial inner membrane protein required for assembly of cytochrome c oxidase (complex IV); associates with complex IV assembly intermediates and complex III/complex IV supercomplexes; similar to human SURF1 involved in Leigh Syndrome					TTACATGGTACTCGCTTTCTGCGCTAACCGCCGTGATGTTCGCTCGCCTCTTGATCAGACGGAAACAAAA
CC_OL_001_F24	CC1G_01839																				0		GCGTCAGGCAGGAGTATATTCGTCACCAACCTATCGCTCAGCAAACACTGCGCCTATTTGTGGAAAGGTA
CC_OL_001_G01	CC1G_01861															YHR063C	PAN5	2-dehydropantoate 2-reductase, part of the pantothenic acid pathway, structurally homologous to E. coli panE			0		TCCTTATCAAAGACATAGCCGTCGAAGGTGATCCAGAGTATCCCCATTACCGGAGTTTGCGAGACACGGT
CC_OL_001_G02	CC1G_01864		+										+								6		CTTAGCCTTGGTTACGATGTCAACGGATTCGACGACGAGGTTGTCCAGCGTTTCTGGAAGCACCTTCTAT
CC_OL_001_G03	CC1G_06620															YPR006C	ICL2	2-methylisocitrate lyase of the mitochondrial matrix, functions in the methylcitrate cycle to catalyze the conversion of 2-methylisocitrate to succinate and pyruvate; ICL2 transcription is repressed by glucose and induced by ethanol					TTCAAAAGAAGGAGAAGGCCATTGGATGCGATGTCCTTACCCACCAGAGATGGAGCGGCGCAAACTACAT
CC_OL_001_G04	CC1G_06592																						GGCGCCGACGCATTGAGATTCGTAGGATAATCGGCATTCAGGTTTGTCCTCTTATTGTTCTTGCACTCTC
CC_OL_001_G05	CC1G_06566																				3		TGGAGGAAAATGCTATTCATGCGAAATATGTCGAGTTGTTTGCCGAACTTAAACGCCTAGAGCGGGAGCA
CC_OL_001_G06	CC1G_06582																				0		AACAACATCCTCATGAGCAGAAGACCGTCCGTTTCAACAACAAACCCCCGTCCGAGATCCCGTATTACCA
CC_OL_001_G07	CC1G_13758																						AAAGCGAATTATCCTGGCTACAGAGACGCGTTCGAGAGGTACCGCAAGGGCCTTCTTGAGTATATGGACA
CC_OL_001_G08	CC1G_00634															YJR105W	ADO1	Adenosine kinase, required for the utilization of S-adenosylmethionine (AdoMet); may be involved in recycling adenosine produced through the methyl cycle					ACTTTGGGCTGCGACGGAAGTGACTCTTTACTACTGTGTTCACCCCCTTTAGTGTCCCTTGTGATGTTGC
CC_OL_001_G09	CC1G_00618																						GTTGGGGTGAAGTCCTGTAGGGTTACCGCTGGCTTGGTCTATGCGTACTGCTTTCGCAGTACAAAATGAA
CC_OL_001_G10	CC1G_00616															YGR254W	ENO1	Enolase I, a phosphopyruvate hydratase that catalyzes the conversion of 2-phosphoglycerate to phosphoenolpyruvate during glycolysis and the reverse reaction during gluconeogenesis; expression is repressed in response to glucose					AGATTGGTACAGAGACCTACCACACCCTCAAGAAGGTCATCACCGCCAAGTACGGTATTGATGCCGTCAA
CC_OL_001_G11	CC1G_00576															YKL150W	MCR1	Mitochondrial NADH-cytochrome b5 reductase, involved in ergosterol biosynthesis					TCAAGGAGGGTGACACTCTCGCTATCAAGGGCCCCATCCTCAAGTTCCCTTACAAGGTGAACGAATTCGA
CC_OL_001_G12	CC1G_13742		+																				TTTGGACACGCCTTGGGTCTTCGCGGGTGGAGAGGACTTGAGCGTTGTTACAGTTATAATCAAAAGCTCG
CC_OL_001_G13	CC1G_00552	+													+								GTAGAACCAGAGATGTACACGAAACTCTGCACGATAGAGATGGACCTGTCGCATATACCTCTAACGCCCC
CC_OL_001_G14	CC1G_00542										+		+		+								TATCGGAACCGAGGATGCTCCTACAATAACCCTTGTCTCGAAATGTACTCGCTGCCTCTTACCCAACGTG
CC_OL_001_G15	CC1G_00527												+			YJL111W	CCT7	Subunit of the cytosolic chaperonin Cct ring complex, related to Tcp1p, required for the assembly of actin and tubulins in vivo			4		GTGGATGGCCCGTCCGGTATTCGGGATAACATGGAGGCTTTCGTTTGGGAACCAAGTCTTGTCAAAATCA
CC_OL_001_G16									+														CGGCGGGCCATGGTTGACGTCATTCGCAACATTGATAGATTTCTACTCCCCTCCGCTCTTTTCCCTTTTT
CC_OL_001_G17	CC1G_00516															YOR133W	EFT1	Elongation factor 2 (EF-2), also encoded by EFT2; catalyzes ribosomal translocation during protein synthesis; contains diphthamide, the unique posttranslationally modified histidine residue specifically ADP-ribosylated by diphtheria toxin					GCAAGGGTCTCAAGCCTGAGATTCCTCCCCTTGACACCTACTACGACAAGCTCTAAGTAGTTGTACATCG
CC_OL_001_G18	CC1G_13741															YBR208C	DUR1,2	Urea amidolyase, contains both urea carboxylase and allophanate hydrolase activities, degrades urea to CO2 and NH3; expression sensitive to nitrogen catabolite repression and induced by allophanate, an intermediate in allantoin degradation			0		GTTGGAGAGCATGAAGACCGAGACCGTCTTGAGAAGCGATGTTTCCGGTATTGTGAAAGCTGTTGGATGC
CC_OL_001_G19	CC1G_00558																				3		TGTTGGTGAATCCATTGCATGGGTTATTGGATCGGCTTATCAGGAATACAAGCAGGGTCTCGACATGATC
CC_OL_001_G20	CC1G_00577		+		+		+		+		+					YLR113W	HOG1	Mitogen-activated protein kinase involved in osmoregulation via three independent osmosensors; mediates the recruitment and activation of RNA Pol II at Hot1p-dependent promoters; localization regulated by Ptp2p and Ptp3p					TTTTACTTCTCTGATACACGGTCGCTTTTCCGGCGGCACATAGCCTTTGCTTGTTCCTTACCTCGGGGTT
CC_OL_001_G21	CC1G_00611															YDR326C	YSP2	Protein involved in programmed cell death; mutant shows resistance to cell death induced by amiodarone or intracellular acidification			0		TGAGACAAGTAATCCGTTGTCGTGGAAAGAAGAGTTGGCGCATTTGCAGGAGACGTTGGCGACGGTAGAA
CC_OL_001_G22	CC1G_00637												+		+						4		AAGACCAAGGCTTCCCCTCACGCCGTTTCCAAGGCATACGCAAAGACCAACATCCGCCAACGATCAGGAG
CC_OL_001_G23	CC1G_00660															YBR189W	RPS9B	Protein component of the small (40S) ribosomal subunit; nearly identical to Rps9Ap and has similarity to E. coli S4 and rat S9 ribosomal proteins					GGGTCCCACACCGCGTCGCATGCCATCCACATTTTAGCTGTATGACCCAATGCAAATATGCTATGAACCA
CC_OL_001_G24	CC1G_00718														+								CGGTTCACGAAACGCGACTGACGAGGTGGAGACGATAAGGACAATGGATTGACGGACAATGGCTGCATAA
CC_OL_001_H01	CC1G_00725																						GGGACTGCTAGAGAGCACGGCATGTGGAGTAGCGTAGTAGACTCTAAGGATAGACGCTTTCAGAATGACA
CC_OL_001_H02	CC1G_13780														+	YNR020C	ATP23	Putative metalloprotease of the mitochondrial inner membrane, required for processing of Atp6p; has an additional role in assembly of the F0 sector of the F1F0 ATP synthase complex			8		CCTTGCTGATAGCCACGACGACTCTTCTGCCACCTCGTCGATCGCTTCCCGCCTTGGCCTCTTGGGTGCC
CC_OL_001_H03	CC1G_08821															YPL220W	RPL1A	N-terminally acetylated protein component of the large (60S) ribosomal subunit, nearly identical to Rpl1Bp and has similarity to E. coli L1 and rat L10a ribosomal proteins; rpl1a rpl1b double null mutation is lethal					TTGGGAGCTGATGCGGTCTCCTGTTTCTATCCTGGTGCTTATCCTACTGCCGATTCCGTTCTTCTTCGTT
CC_OL_001_H04	CC1G_08775																				0		GGGATTCAGACGCCTCGTCAGAGATCATTACTTGCTTTGTACCAGACCGACCTGTTCGACCACTACCTAA
CC_OL_001_H05	CC1G_09623																				1		TTTGGAAAGGGTACAGTCTCTTGGTCCGCCGTGAAAAGGGTCTATGACCGTGATGGGAGTCCTGGCTCAG
CC_OL_001_H06	CC1G_05985																						AGGTCTAAAGCCTTTCAAATGCGTGTTGAAACCGCGATCCGGAGTTACGAAGTCGTTCCTCGAGTCTCTG
CC_OL_001_H07	CC1G_06013																				0		CTTCGTTCAGGGACGAGCTTGAATATGTTGGATTGGAGAGGGAGCAGTGGTTGCCTAAACCTGAGGAACT
CC_OL_001_H08	CC1G_11141																						TTACGAAGAGCACTGGACAACTAACAAGTCACAGTCGATGCCGCCAGCCATCAAATTCACGCCTGGCTTG
CC_OL_001_H09	CC1G_11153															YJL008C	CCT8	Subunit of the cytosolic chaperonin Cct ring complex, related to Tcp1p, required for the assembly of actin and tubulins in vivo			3		AAAGCCAACAACGTCCAGCTCTTCAAAGATGGCTACAAGCACCGACAAGGCCTCGAAGACGCAGTTTTGC
CC_OL_001_H10	CC1G_14120	+																			3		AACTTCCGGTCTCCAGCGCCGTCGATTGTTCCACTCGTTCTACTCCTTCTTTCCTATCCTATTGGCAAGT
CC_OL_001_H11	CC1G_04657																						CACGGGTACCGGTAGTTCTAAAGAGCGTAACATAACATAGAGATAAAGATACACAATCCTAGCAAATGCA
CC_OL_001_H12	CC1G_14100												+		+	YPL210C	SRP72	Core component of the signal recognition particle (SRP) ribonucleoprotein (RNP) complex that functions in targeting nascent secretory proteins to the endoplasmic reticulum (ER) membrane					GGGGATCGGCGGTGGCTATTTATTTGCGTTCCCTTATCTCATTTTCTTGCGAGCGGTGGTACTTATTGGC
CC_OL_001_H13	CC1G_14140															YER126C	NSA2	Protein constituent of 66S pre-ribosomal particles, contributes to processing of the 27S pre-rRNA			2		TCCAGTTGCAAATCTTGGGTGTCAAGAAAAACCCTCAGTCGCCTATGTACACGCAGTTGGGTGTGCTCAC
CC_OL_001_H14	CC1G_04501															YCR009C	RVS161	Amphiphysin-like lipid raft protein; subunit of a complex (Rvs161p-Rvs167p) that regulates polarization of the actin cytoskeleton, endocytosis, cell polarity, cell fusion and viability following starvation or osmotic stress					CCATTGCATACCAGGTCGAAGGAGTACTGGCTGAGATGCGGGAACTCTCAATATGCGGCGGAAATTGATT
CC_OL_001_H15	CC1G_04473																				0		GCATGAACCACCCCATGGGTCCCCTCCAACTTGCCGACTTCATCGGTCTGGACACCTGCCTCGCCATCCA
CC_OL_001_H16	CC1G_04483															YNL027W	CRZ1	Transcription factor that activates transcription of genes involved in stress response; nuclear localization is positively regulated by calcineurin-mediated dephosphorylation			0		CAGAGACTACGGGCGTTATGCACCTCCACCAGGAATACCAACACCACCTATCCATTTCGCACCTCATTTA
CC_OL_001_H17	CC1G_04494														+						0		ACACCCTCGGAGCCCATAAAGACTGACGAACCCTCTGAACCCACATCCCAAACTACACCTGCGGTCAAGG
CC_OL_001_H18	CC1G_04512																						CGGGGACAACGCAGGATCCAATCGTGCTTGGGCGGTAGTATGACATTTTCGGGTTCACCTCTTGTATTTA
CC_OL_001_H19	CC1G_04523												+			YOR165W	SEY1	Protein of unknown function, contains two predicted GTP-binding motifs GXXXXGKS and DXXG near the N-terminus, homolog of the Arabidopsis gene RHD3 (Root Hair Defective)			0		TTGTTCGCTCTTGCTTCTGCGTATATGATCATTCAACTCGGGCTTACGGGTCCTTTGCTGCAAGTGACGC
CC_OL_001_H20	CC1G_04524															YNL279W	PRM1	Pheromone-regulated multispanning membrane protein involved in membrane fusion during mating; predicted to have 5 transmembrane segments and a coiled coil domain; localizes to the shmoo tip; regulated by Ste12p			0		TTGGATGCAGATTCCAAGGCTTCCGACAATCCACCTGGGCTGTTCGGTAAAGTGAAGGGTGTATTTGGGA
CC_OL_001_H21	CC1G_09336												+								0		GGCCAGCTTGACCAAGGACCATCTCGTCAAGAATGACGTATCGATCAGCGCCATCACTCTCATTTTCCGT
CC_OL_001_H22	CC1G_09323															YPR002W	PDH1	Mitochondrial protein that participates in respiration, induced by diauxic shift; homologous to E. coli PrpD, may take part in the conversion of 2-methylcitrate to 2-methylisocitrate			0		AAATCCAGGGTGGCCTCGCTTTGCTCAACTCCTTCAACCGAGTTGGCATTGATCACGTCGTTCTCGTCAA
CC_OL_001_H23	CC1G_09303															YGL123W	RPS2	Protein component of the small (40S) subunit, essential for control of translational accuracy; phosphorylation by C-terminal domain kinase I (CTDK-I) enhances translational accuracy; similar to E. coli S5 and rat S2 ribosomal proteins			2		CGCTATCGGTGATTTCGACGGCCATGTCGGTCTCGGTGTCAAGTGCGCAAAGGAAGTTGCAACTGCCATT
CC_OL_001_H24	CC1G_09318																						GTCTGCGGGCTCCTCTGCCACACAGGCCTTAAGCAAATGTTACTGGCTGCCATGGACAAAATACGAAATT
CC_OL_001_I01	CC1G_09329		+		+								+										GAGCGGCTCTCTCTGCATTGTGCGCCGGTAACTTATTTGGAACCCTTCCGTCCATCTGTAGAATATTTGG
CC_OL_001_I02	CC1G_09339		+		+																		GACTGGCTCGTCGTTAAGACCATATCCAAACCGCTATACACCACTATCACCGACTCATACGGTCTCCACC
CC_OL_001_I03	CC1G_09342															YER102W	RPS8B	Protein component of the small (40S) ribosomal subunit; identical to Rps8Ap and has similarity to rat S8 ribosomal protein			5		TCTACAACTCATCGAACAACGAACTTGTCCGAACCAACACCCTCGTCAAGGGCTGCATCATCCAGATCGA
CC_OL_001_I04	CC1G_09349																				0		GCTACCAATTCAAACGACCTCTCGCATCTTTCCAGCTCGTTCAGAAGAAACTTGTGGACGCCCACACAGA
CC_OL_001_I05	CC1G_12089																						TACCCGTCCTTATATTTAGTCCTTCAGATGCTTGGGTCAATTGTTCGAGACGCGGACTTTGCCCACGTCC
CC_OL_001_I06	CC1G_11818																						GACTAATGGTCGTGGAATTTTCTATGGCGACTTGGTTGCCGCCTAGCCATTGGGCTACTGTAACGTGTAC
CC_OL_001_I07	CC1G_11833												+		+						0		CTTACCGGCAAGACCATCACTCTTGAAGTCGAGTCGTCCGATACCATCGATAACGTGAAGGCGAAGATTC
CC_OL_001_I08	CC1G_02051																				3		CCTATGAAATGACCCTCCGAGAAGGCCTGAGATTCGAGAGGAGAATCTTCCACGGTTTGTTTGCCACCAA
CC_OL_001_I09	CC1G_02043				+				+					+							0		AGGCGGCTCTAAAGCATATTGCAGATGTTGGGATTGCTGTCTGGACACTGGTTATCGCCGGCCATACATT
CC_OL_001_I10	CC1G_01999															YPR004C		Protein with similarity to mammalian electron transfer flavoprotein complex subunit ETF-alpha; interacts with yeast frataxin Yfh1p; null mutant displays increased frequency of mitochondrial genome loss (petite formation)			0		ATCTATGCCGGAAATGCTATTGCAACTGTCGAAGCCCCCGCGTCGATACCCGTCAAGTTCTTTACAGTCC
CC_OL_001_I11	CC1G_01940															YDL004W	ATP16	Delta subunit of the central stalk of mitochondrial F1F0 ATP synthase, which is a large, evolutionarily conserved enzyme complex required for ATP synthesis; phosphorylated			0		TTGCTGTCCTCTGTCGCTCGGCGCGCACCCGCTTTTGCTTTGGGACGACGTGGTTACGCCGATGTCAGCG
CC_OL_001_I12	CC1G_01923																				0		TCGATCGGCAAATACGGTGCTGGTGCGGGAACAGAAGCCATTCTCGAACGAGTTGAAGAAGTAGCCAAAA
CC_OL_001_I13	CC1G_01907	+											+		+	YJR123W	RPS5	Protein component of the small (40S) ribosomal subunit, the least basic of the non-acidic ribosomal proteins; phosphorylated in vivo; essential for viability; has similarity to E. coli S7 and rat S5 ribosomal proteins			4		AACGCCGCAAAAGGTTCATCGAACTCCTATGCTATCAAGAAAAAGGACGAGCTGGAGCGTGTCGCCAAGT
CC_OL_001_I14	CC1G_14172															YLR253W		Putative protein of unknown function; the authentic, non-tagged protein is detected in highly purified mitochondria in high-throughput studies; transcription is periodic during the metabolic cycle; YLR253W is not an essential gene			0		TGAAGGGCGAGGAAATGGAAGGAGAGCTTATATGCCGAAGCGATGCATCAGAATGCAGATGCACAGTCCA
CC_OL_001_I15	CC1G_01905		+																				GCCTAGCACGATCATCAGCCATCCTCAGTTTCACCTACCGTCACGATATATCAACCATCTCAGTCTGGAG
CC_OL_001_I16	CC1G_14181												+								0		GCCGGGATAGCACCCAACAAGATGCTAGCCAAGATTTGCTCAGACAAGAACAAACCTAATGGCCAATTCA
CC_OL_001_I17	CC1G_14182		+													YDR530C	APA2	Diadenosine 5',5''-P1,P4-tetraphosphate phosphorylase II (AP4A phosphorylase), involved in catabolism of bis(5'-nucleosidyl) tetraphosphates; has similarity to Apa1p			0		GGAGTCAACGCTGCCGTTTATTCGCTCCTTGCAATGTTTTGTTATACGCGAGCAGTTATGTTAGGAGAAG
CC_OL_001_I18	CC1G_01961												+		+	YJL187C	SWE1	Protein kinase that regulates the G2/M transition by inhibition of Cdc28p kinase activity; localizes to the nucleus and to the daughter side of the mother-bud neck; homolog of S. pombe Wee1p; potential Cdc28p substrate			8		TTGCGCGTGCGAGAGAGAAGATGGAGATGACATATGCAGAGGCCAAAGCCAACGGAAGTACTGTTTTTGC
CC_OL_001_I19	CC1G_02009															YAL026C	DRS2	Aminophospholipid translocase (flippase) that maintains membrane lipid asymmetry in post-Golgi secretory vesicles; contributes to clathrin-coated vesicle formation and endocytosis; mutations in human homolog ATP8B1 result in liver disease					AGATCAGGCCAAAATCATTCGAGCCTACGACACATCGAAAGCAGATGCACGGCCATCGGGTTACTAGAGT
CC_OL_001_I20	CC1G_02015																				0		GGTCTCCCTGTGTTTGATCATGAAGGTATTGCGAAGGATGTCAGCGCCCTGTTCAGCGGATGTGTAGTAT
CC_OL_001_I21	CC1G_02036															YJR051W	OSM1	Fumarate reductase, catalyzes the reduction of fumarate to succinate, required for the reoxidation of intracellular NADH under anaerobic conditions; mutations cause osmotic sensitivity			7		CTGAAGCCGAGTACACCGTCGAGGAAGTTGCCAAGCATAACACGAAGGATGATGTTTGGGTCATCATCGA
CC_OL_001_I22	CC1G_07413															YBR267W	REI1	Cytoplasmic pre-60S factor; required for the correct recycling of shuttling factors Alb1, Arx1 and Tif6 at the end of the ribosomal large subunit biogenesis; involved in bud growth in the mitotic signaling network			0		CGAGAAGAGCAAGGGCTTTAGGAGTCTAGAGGCTGCGAGGAAACATATGATCGACAAGGGTCATTGCAAG
CC_OL_001_I23	CC1G_07356															YMR116C	ASC1	G-protein beta subunit and guanine nucleotide dissociation inhibitor for Gpa2p; ortholog of RACK1 that inhibits translation; core component of the small (40S) ribosomal subunit; represses Gcn4p in the absence of amino acid starvation					CCAACGTCATGAACCCTGTCATTGTCTCCTGTGGTTGGGACAAGGTTGTTAAGGTCTGGGAACTCTCCAA
CC_OL_001_I24	CC1G_07394						+														3		CTGCAGCTCGAGCTCGCGTCATTGGAACAGGAATTGGCTGATCCTACCAACCCACTTATACAGAAAGAGA
CC_OL_001_J01	CC1G_07408												+			YDR052C	DBF4	Regulatory subunit of Cdc7p-Dbf4p kinase complex, required for Cdc7p kinase activity and initiation of DNA replication; phosphorylates the Mcm2-7 family of proteins; cell cycle regulated					AGGATGCTTCCCTCCCTCTCGATTCGGAAACCCCTTGATTCACCCACTTCGGAACGACACTTTCTTGTAT
CC_OL_001_J02	CC1G_07412															YLR084C	RAX2	N-glycosylated protein involved in the maintenance of bud site selection during bipolar budding; localization requires Rax1p					GGTATGCGCGCCATGTCCGAACGGGCCGTGAGGGTGTTGTTCCTGCAGCTTATTTGTACTAGATTATAAT
CC_OL_001_J03	CC1G_14226															YMR309C	NIP1	Subunit of the eukaryotic translation initiation factor 3 (eIF3), involved in the assembly of preinitiation complex and start codon selection			0		ATTTCTCGAGCAAAGAAGAGGAGTGTTGAACCGAGCAATGCCAGCAACCGATTGAGTACGAGCAGCGTGT
CC_OL_001_J04	CC1G_14225															YMR309C	NIP1	Subunit of the eukaryotic translation initiation factor 3 (eIF3), involved in the assembly of preinitiation complex and start codon selection					ATATCTCGCAGAGCAATACTCTGAGACACCTGAAGGACAAAGGCAAGTCCGCCGGGCCAAGGACAAGACC
CC_OL_001_J05	CC1G_11546												+			YOR028C	CIN5	Basic leucine zipper (bZIP) transcriptional factor of the yAP-1 family that mediates pleiotropic drug resistance and salt tolerance; localizes constitutively to the nucleus			0		CTCAGCAACAATCTACAATGCGTTTGCGCGATGATCCACCAACTATAACTCCTCCAGCCACCACAAGGAG
CC_OL_001_J06	CC1G_06891																				8		GTCAGATGACGGTGTTGTTATCCTCCATTCCTCTCTCCCTGGTGGAACCTCTGCTCCATACAACCTTGGT
CC_OL_001_J07	CC1G_06888																						CGCCTTGCTTATGACCATGATTTAATCCACACTAAGACTCCTCAGACCCCTTATGCCCCCTCTTTGTAGC
CC_OL_001_J08	CC1G_06880																				9		TTCTGGTGCAAACACAGGCCACATACACCTTCTACAGGGGAGAACCGCGGCAGATAGACTGTATGACAGT
CC_OL_001_J09	CC1G_06822															YOR120W	GCY1	Putative NADP(+) coupled glycerol dehydrogenase, proposed to be involved in an alternative pathway for glycerol catabolism; member of the aldo-keto reductase (AKR) family			8		GGCGCGTACAGAGGTTACTCTGTCATTCCAAAGAGTGTCCAGGAATCCCGTATCAAGTCGAATTTCCAGC
CC_OL_001_J10	CC1G_06820															YEL037C	RAD23	Protein with ubiquitin-like N terminus, recognizes and binds damaged DNA (with Rad4p) during nucleotide excision repair; regulates Rad4p levels, subunit of Nuclear Excision Repair Factor 2 (NEF2); homolog of human HR23A and HR23B proteins			5		GTTCAAAACCTCGTCGAGATGGGTTTCCCTCAAGAGCAAGTCGTCCGTGCAATGAGGGCAAGCTTCAACA
CC_OL_001_J11	CC1G_06838																						CGCGACGGCCACATGAGCTCCGTCGTCGTCTCCCTTTTCCACTAATTTTATGACACTGTAGAATCAAAGG
CC_OL_001_J12	CC1G_06842															YIR027C	DAL1	Allantoinase, converts allantoin to allantoate in the first step of allantoin degradation; expression sensitive to nitrogen catabolite repression					GTCTTCCCCCTCTTGGGAAGCTGATCTAGCGCGTATGTATTATCGCCAGTCGAATCAATCCTTGGTTCCT
CC_OL_001_J13	CC1G_03333																						CGTGATAGGTGAGACTTTCCGCAAACTCCTTCGGCCTTCTGGACATCTTGCTCATTGTTCTCACAGACGA
CC_OL_001_J14	CC1G_03304		+					+					+			YMR196W		Putative protein of unknown function; green fluorescent protein (GFP)-fusion protein localizes to the cytoplasm; YMR196W is not an essential gene					CCCAGATGAGGCCGGCACCTTGTACGACATTTCTCCTGATGCTCTTTAGACGATTCCAGATGGACGTTAT
CC_OL_001_J15	CC1G_03299																				0		AGGGGGAATATACCTTGGAGACTTGCAATCCAGGCGATTTGGTCCTCATCCATGGCTCGGTGCTGCACAA
CC_OL_001_J16	CC1G_03263															YNL305C		Putative protein of unknown function; green fluorescent protein (GFP)-fusion protein localizes to the vacuole; YNL305C is not an essential gene			8		CATCATGGGTGCTATCAGCCTCTACCTCGACTTCATCAACCTCTTCATCAACATCCTTCGGTTGCTAGGC
CC_OL_001_J17	CC1G_03217															YJR040W	GEF1	Chloride channel localized to late- or post-Golgi vesicles, involved in iron metabolism; highly homologous to voltage-gated chloride channels in vertebrates					GACGGACTGCTAGAGGAGCTGTGGAATTGGGGTAGTGATTTAAGAGATCAAATGCTCAAGTGGGGCTGGA
CC_OL_001_J18	CC1G_03206																						AGTTCGTCATACTTGTTCTTCTTCGATGCGGCCTCCAGCTGACATACCCGTTTAGCGTTCTGTAAGCCCT
CC_OL_001_J19	CC1G_03218															YJR076C	CDC11	Component of the septin ring of the mother-bud neck that is required for cytokinesis; septins recruit proteins to the neck and can act as a barrier to diffusion at the membrane, and they comprise the 10nm filaments seen with EM					GATTCACCACCCGGCTTAATCTCACCCACCCGAATCCTAGTAATCGACCCTATCTTGGCATCTCTTCTTG
CC_OL_001_J20	CC1G_03237																						CAAGTTCTCTTCTCGCTGCTAAGGCCATCGAGTCTCGTGCTGCTATTGTTGTATTATCCATCTCGCTCCC
CC_OL_001_J21	CC1G_03269															YLR048W	RPS0B	Protein component of the small (40S) ribosomal subunit, nearly identical to Rps0Ap; required for maturation of 18S rRNA along with Rps0Ap; deletion of either RPS0 gene reduces growth rate, deletion of both genes is lethal			4		AGCCCCGTATCATTATCGTGACCGATCCCCGTGTTGACCACCAGGCCATCCGAGAGGCTTCCTATGTCAA
CC_OL_001_J22	CC1G_14256				+									+									CGACGATCATACCTTGCCCACGGACTGTAAATAGCTCTGTGCTTTACGATACCTTTTTCGCGGCTGAGGA
CC_OL_001_J23	CC1G_02391																						ATGTTGGTTGGGTCATTGGTATCATCTGGTTGGCTGGGCGAAGGTCGTATGTATCCTGCCCCGGAAATTA
CC_OL_001_J24	CC1G_02329																				0		CGTGGTTGGCTGCTCAATATCCTTAATCGGCTACATCATCCTCATCTCTCAAAACACTGTTGCGGGCTCG
CC_OL_001_K01	CC1G_02286											+									0		GAATACAGTCCCTATGCGCTAAGTCAACCCTTATTCGCGAACGGAACAACCATCCCCAACGGATCCTACA
CC_OL_001_K02	CC1G_14273																				0		ATGATGGAGAACCTCGAATCACCAACGGACAGTATCCCCATCTCCGCCTCGGACGTCAACTTTACCTATA
CC_OL_001_K03	CC1G_02298															YNR007C	ATG3	E2-like enzyme involved in autophagy and the cytoplasm-to-vacuole targeting (Cvt) pathway; plays a role in formation of Atg8p-phosphatidylethanolamine conjugates, which are involved in membrane dynamics during autophagy and Cvt					CCGACTATTGAGGTTGATAGTACTACTTCGTTTTAGGTGGGAGGTGGGATGTGGAAAGTGGAAGGGGCTG
CC_OL_001_K04	CC1G_02312															YDR037W	KRS1	Lysyl-tRNA synthetase					GGTCCTACCCTCGGTCCTTCCGGCCAGATCTAATCCTTGCATATATCCATCGACGAGTGAAAAAAAGAGG
CC_OL_001_K05	CC1G_02313																				0		ACTGGGCTATGTGTGGGTAGTCACTTGGTTCACGTTCTCGTTGCCGCTATGGGTGGAACAACTCATGCGA
CC_OL_001_K06	CC1G_02394																						GGGATTAATAGAACTCTGAGTGGTGATAAGTTTCGGGGCGGAATTCGGGATGGCTCGTTAAGCCCTCGTA
CC_OL_001_K07	CC1G_03972																				0		TGTGGACCATTACACCGAATTCACGGTCCCGCCTTTACTTGGAAACGATAACGAGAAGTATGAGGGGAGG
CC_OL_001_K08	CC1G_04022																				0		ACTATTCCGCCTCGATACCCACTTCGCTATTCTTCTATGCAGTCCTTCTAGTTGGAGCTGCGCTCACCAT
CC_OL_001_K09	CC1G_04039		+		+																7		CCACGCCGGAAACTCTGACCAAGTATGATGGTTTCTTGATGGGTATTCCAACGCGATACGGTAACATGCC
CC_OL_001_K10	CC1G_09897															YPL078C	ATP4	Subunit b of the stator stalk of mitochondrial F1F0 ATP synthase, which is a large, evolutionarily conserved enzyme complex required for ATP synthesis; phosphorylated			0		TGATCACCAAAACCGGCACCGCTCTCCTTGGAACTGGTCTCGCCGCAACTGCCATTTCGCAAGAATTGTA
CC_OL_001_K11	CC1G_14799																				0		GTTATCTTAAGTTCCTGATGTACTTTGGCGCGCTTCGCTAGGTCCTATATGGAAGGCATCCGTCGGGGAT
CC_OL_001_K12	CC1G_09879												+			YDL126C	CDC48	ATPase in ER, nuclear membrane and cytosol with homology to mammalian p97; in a complex with Npl4p and Ufd1p participates in retrotranslocation of ubiquitinated proteins from the ER into the cytosol for degradation by the proteasome			0		TTCTTCCTCATCAACGGTCCCGAGATCATGTCTAAGATGGCTGGTGAATCCGAGTCCAACTTACGCAAGG
CC_OL_001_K13	CC1G_00963											+		+		YER053C	PIC2	Mitochondrial phosphate carrier, imports inorganic phosphate into mitochondria; functionally redundant with Mir1p but less abundant than Mir1p under normal conditions; expression is induced at high temperature					ATGGTGGTGAACGTCACATTTACTGCTATAGATTCCCCGGCGAACCCCATGGACTGGGAGGAAGATGGGT
CC_OL_001_K14	CC1G_00925		+										+			YIL140W	AXL2	Integral plasma membrane protein required for axial budding in haploid cells, localizes to the incipient bud site and bud neck; glycosylated by Pmt4p; potential Cdc28p substrate					CCAAGGCGGTGATCGTCTGTTGAACAGCGGGGGAGGCACTCTTGTTGATAATCATTTTAGGCTTACACTC
CC_OL_001_K15	CC1G_00882															YGL190C	CDC55	Non-essential regulatory subunit B of protein phosphatase 2A, which has multiple roles in mitosis and protein biosynthesis; involved in regulation of mitotic exit; found in the nucleus of most cells, also at the bud neck and at the bud tip			0		GGAAGCGATGCAATTGGAGACACTCGATTTCAACAAGAAGATTCTACACGCAAGCTGGCACCCTCGAGAG
CC_OL_001_K16	CC1G_00856																						GTCAGGGGTGGTAGAAAGTGGATTGGTATAGGTAGACGAACGCTGCTGGTGGACATAGATACTTAGTGCC
CC_OL_001_K17	CC1G_14823		+											+		YOL071W	EMI5	Non-essential protein of unknown function required for transcriptional induction of the early meiotic-specific transcription factor IME1, also required for sporulation; null mutant excretes excess acetic acid					TGGATCCTACATTTATCATTTCCCATAGGGTAGGTTTGGAAGATCTGCCTGCCCTCTACGCCGCGTTCGA
CC_OL_001_K18	CC1G_00749															YDL029W	ARP2	Essential component of the Arp2/3 complex, which is a highly conserved actin nucleation center required for the motility and integrity of actin patches; involved in endocytosis and membrane growth and polarity					GAGGAATGGTTCGAGAAGGGCATCCAGGCCTTGGACAAGCTAGGACGAGGTGATTAAACGCAAGATTATC
CC_OL_001_K19	CC1G_00758												+		+	YGR085C	RPL11B	Protein component of the large (60S) ribosomal subunit, nearly identical to Rpl11Ap; involved in ribosomal assembly; depletion causes degradation of proteins and RNA of the 60S subunit; has similarity to E. coli L5 and rat L11			0		AACACCCGTCACCTCCAAAGCCCGCTACACCGTCCGAACATTCGGTATCCGACGTAACGAAAAAATCGCC
CC_OL_001_K20	CC1G_00821															YIL145C	PAN6	Pantothenate synthase, also known as pantoate-beta-alanine ligase, required for pantothenic acid biosynthesis, deletion causes pantothenic acid auxotrophy, homologous to E. coli panC			9		CCCAAGCACAAGAACGAATCGCGAAAGGGGGGTTGGACGTGCAGATGAAGCTGGATTACATCGAGATGAA
CC_OL_001_K21	CC1G_00843																				0		GTTCCAACTTTGTTGTATAAAGCCCGCTCGTATATCGCACTCGATAACCCGAAAGCCGCCCTCGACCTAT
CC_OL_001_K22	CC1G_00858															YFL053W	DAK2	Dihydroxyacetone kinase, required for detoxification of dihydroxyacetone (DHA); involved in stress adaptation					TTATGCTCCTCCTTGTGTTTTCTCCTCGCAAATACCTTCGTCAGGTTCCTTTCGGAGCACGACCAGCCAT
CC_OL_001_K23	CC1G_00862																						GGTCCTTGCATGGAGCAAGACCCTTAAGACAGTCACGGACACTCAGAACACCCCGTAGATCGTATATTCT
CC_OL_001_K24	CC1G_00890																						TCGAGTCGAGGTTATCAGAACACCTCAGCAACTTCAGGGCGATTGATAGTCTCATTGGGGAGGCATATGA
CC_OL_001_L01	CC1G_00913	+											+		+	YMR288W	HSH155	U2-snRNP associated splicing factor that forms extensive associations with the branch site-3' splice site-3' exon region upon prespliceosome formation; similarity to the mammalian U2 snRNP-associated splicing factor SAP155					ACTATACATGTCGATGATTTCTTGGTCGAAGACTTTGACGAGCCTCTCCCTGCGGGGAGCTTCAGATGTG
CC_OL_001_L02	CC1G_00971															YHL010C		Putative protein of unknown function, contains a zinc finger region and has homology to human BRAP2, which is a cytoplasmic protein that binds nuclear localization sequences			0		GCAACTCGAGTCTCAGCGCGAATACTACGAAAATCAGGCATCAGAGCTTAAAGAGCAGTTGGTCGATCTG
CC_OL_001_L03	CC1G_09031															YIL065C	FIS1	Mitochondrial outer membrane protein involved in membrane fission, required for localization of Dnm1p and Mdv1p during mitochondrial division; mediates ethanol-induced apoptosis and ethanol-induced mitochondrial fragmentation					GGTTAAGAGCCCAATAAGGGACCACCAAATCGACGGTGTGCGGCTACTGCAAGATATCTATCGCACAGAA
CC_OL_001_L04	CC1G_08990																						CGGCGCTTACTCTGTCACTGGTCCCCCATGGCGCCCGAATGGCCTTCATACTTCACATGACTTTATATTC
CC_OL_001_L05	CC1G_08989															YGL255W	ZRT1	High-affinity zinc transporter of the plasma membrane, responsible for the majority of zinc uptake; transcription is induced under low-zinc conditions by the Zap1p transcription factor			0		AAGCGTGTTCGACTTCGCAAAGTACTTTGGCTCGGGTATCATCATCGCCACCGCCTTCATCCATCTCCTT
CC_OL_001_L06	CC1G_09000															YBL099W	ATP1	Alpha subunit of the F1 sector of mitochondrial F1F0 ATP synthase, which is a large, evolutionarily conserved enzyme complex required for ATP synthesis; phosphorylated			0		AAGATCATGAAGAAGTTTGCCGGTTCCTTGAAACTCTACCTCGCTCAGTACCGTGAAGTCGCTGCCTTCG
CC_OL_001_L07	CC1G_14862															YBR026C	ETR1	2-enoyl thioester reductase, member of the medium chain dehydrogenase/reductase family; localized to in mitochondria, where it has a probable role in fatty acid synthesis					GGGAAGAAGATCCTGCTCAAAGTCGATTAGACTACATACCGGGTGTCGGAAAGCAAGGGGCCCATAAGAT
CC_OL_001_L08	CC1G_11571															YHR039C	MSC7	Protein of unknown function, green fluorescent protein (GFP)-fusion protein localizes to the endoplasmic reticulum; msc7 mutants are defective in directing meiotic recombination events to homologous chromatids					CGTGCTGGTGCACAACGAGTTGCATAGGAACCTTAAGAAGCCTGGCTCAGCGTGAAGAGGACTAATTACA
CC_OL_001_L09	CC1G_05765												+										CTTTCTCGTCCTGCATTGCATTGTTTTCTCCTCTTCACTATCATTATTTCATTGGGCATTTGTAACATCC
CC_OL_001_L10	CC1G_05697																						GCCACCACTGGCACCCCCACTGTATTTTTAGTTATTTATTCAATGCCTAGATCTCGGGCGACTCTGTAAC
CC_OL_001_L11	CC1G_05686																				0		CTGGAAGAGTTCCCCGTTCTGGGATATGAAGGCAATGGCAACAATCGTGGTCGCAAGCATCAGTACAATG
CC_OL_001_L12	CC1G_05685																				0		AGAAGTTCTTGGTACTGAAGAAAGGACCCAACTTTGAACCCCCGAATGGGTATAATACGAGGGAGCAGGC
CC_OL_001_L13	CC1G_05664													+		YBR218C	PYC2	Pyruvate carboxylase isoform, cytoplasmic enzyme that converts pyruvate to oxaloacetate; highly similar to isoform Pyc1p but differentially regulated; mutations in the human homolog are associated with lactic acidosis					GAAGCCAATAAACTTTGCGGTAACATCATCAAGGTCACTCCCTCTTCAAAGGTCGTCGGAGACTTCGCCC
CC_OL_001_L14	CC1G_05692															YDL102W	POL3	Catalytic subunit of DNA polymerase delta; required for chromosomal DNA replication during mitosis and meiosis, intragenic recombination, repair of double strand DNA breaks, and DNA replication during nucleotide excision repair (NER)					GTTCGAAGCGGACGAATGGTGATTCTAGACACGGTGATGGACGGTTGCATTCCCTCAGTTACGTTGCATA
CC_OL_001_L15	CC1G_05709		+																		0		ACACCATCGAGAGGGATCAACGGGTAGCATTGGAGCTCCTCCATCACCTACTCTGTCTCCGCGTATGAGG
CC_OL_001_L16	CC1G_05719		+													YFL030W	AGX1	Alanine:glyoxylate aminotransferase (AGT), catalyzes the synthesis of glycine from glyoxylate, which is one of three pathways for glycine biosynthesis in yeast; has similarity to mammalian and plant alanine:glyoxylate aminotransferases			0		GTCCTACTACGCCAGCTGGAAAAAATGGCTCCCCATCATGAACGCATATGAATCTGGCTCTCCAGCCTAT
CC_OL_001_L17	CC1G_05724		+											+							0		TTTGTCGATTCTGGTCCCGCATTCCAAGAGTATCTCCAATCGCAAGACGTGATTGGTATCTCGCGTGCTC
CC_OL_001_L18	CC1G_05750															YGR101W	PCP1	Mitochondrial serine protease required for the processing of various mitochondrial proteins and maintenance of mitochondrial DNA and morphology; belongs to the rhomboid-GlpG superfamily of intramembrane peptidases			0		TTATTACTTGATGCGAGAACAAGAGAAGTCCCAGCCACCCATGCTAGAATCCACCGGCGCTTTCCACTTC
CC_OL_001_L19	CC1G_12227															YMR307W	GAS1	Beta-1,3-glucanosyltransferase, required for cell wall assembly; localizes to the cell surface via a glycosylphosphatidylinositol (GPI) anchor					GTGCCGCGTGGTCCTTGCTGTAAGTTTTGAGATACCACTGAACACTGTTGTTGGATAGCGTTGGACGTCA
CC_OL_001_L20	CC1G_12218																						GCCTAACGTGGGCTGGCGGGTTGTCCGAGCCACTACATACATATTTACTGCATGCGTTCTTTACACGATA
CC_OL_001_L21	CC1G_08323																				3		ACAAACGATCCAGTGCGACTACGCGTTTGTTCGACCACCACCCACAGGGCCAAAGAAAGGCAGGGGACAG
CC_OL_001_L22	CC1G_08316																				0		TCTGCTGCGTACTACGATTTGGGAGACTACATTTCTGCGTTGGCGGATGCGGAAGCTGTGATTCAGATCC
CC_OL_001_L23	CC1G_08328															YDR044W	HEM13	Coproporphyrinogen III oxidase, an oxygen requiring enzyme that catalyzes the sixth step in the heme biosynthetic pathway; localizes to the mitochondrial inner membrane; transcription is repressed by oxygen and heme (via Rox1p and Hap1p)					CGAAGGGTCGGAAGAGGCAAAGCTGCTCAAAGTACTCAAGCATCCGAGGGAATGGGTTTGATATTGGACA
CC_OL_001_L24	CC1G_08360																						GCTGTCTCACTGTCGTAGTTGTCAATCCAAGTCTATATGAAACATGTACGTCTATAGTCTATGCGTTTTA
CC_OL_001_M01	CC1G_08364																				0	erg11	GCACAAGCGTACAGCACCTACGTGGATGGAAACGGAGAGAAGATTGATTATGGCTTTGGAGCTGTGAGCA
CC_OL_001_M02	CC1G_08368															YDR425W	SNX41	Sorting nexin, involved in the retrieval of late-Golgi SNAREs from the post-Golgi endosome to the trans-Golgi network; interacts with Snx4p			0		AGCCAGCGTTGAAGGCTCTGAAACTCACGAAAGCGAAACTGCATCCACTCGTCCCTCGTCAACATACATT
CC_OL_001_M03	CC1G_05954										+		+		+								AAGGGCGCTACCCTCCTCGGTGCCGCTATGGGCCTCGTTGGTGTCGCTTTTGCTCTCTGAATGTGATGTG
CC_OL_001_M04	CC1G_05918																				0		TAGGGGGATGTTGAATCTTGATATGACTGCTTATGTTCGCCCCGGAACCACCGCTGTTGTCGGTTTGCTT
CC_OL_001_M05	CC1G_05925																				0		AAGTGATTATGGACTTGTCGGGCCGGCGGGCAGTGATAAGATTGAGAAGCTGTATCAGGATTGGTTCGAG
CC_OL_001_M06	CC1G_12895															YIL160C	POT1	3-ketoacyl-CoA thiolase with broad chain length specificity, cleaves 3-ketoacyl-CoA into acyl-CoA and acetyl-CoA during beta-oxidation of fatty acids			8		AGAAGGAGGGCAAGTTCAAGGAGGAGATCGTCCCTATCACCGCCAAGTGGGTCGACCCCAAGACTGAGCA
CC_OL_001_M07	CC1G_06981	+														YOR304W	ISW2	Member of the imitation-switch (ISWI) class of ATP-dependent chromatin remodeling complexes; ATPase component that, with Itc1p, forms a complex required for repression of a-specific genes, INO1, and early meiotic genes during mitotic growth			0		AGGAACTGGAGTTGAATTATCCGACGACGAAGGGCAAGGTCTACTCGGAAGAAGAAGACCGATACCTCCT
CC_OL_001_M08	CC1G_07487															YDR074W	TPS2	Phosphatase subunit of the trehalose-6-phosphate synthase/phosphatase complex, which synthesizes the storage carbohydrate trehalose; expression is induced by stress conditions and repressed by the Ras-cAMP pathway			6		AAGCGCCTCTTTCTGTGACGTTGATTGAGGGTGGCAACCAACCGCCTGTTGAACTTGCTATTAAGCCTGA
CC_OL_001_M09	CC1G_10718												+			YPL090C	RPS6A	Protein component of the small (40S) ribosomal subunit; identical to Rps6Bp and has similarity to rat S6 ribosomal protein					TGAAGTTCAACATTGCCAACCCCGCAACCGGGGCCCAAAAACTCCTCGACATCGATGACGAAAAGCGATT
CC_OL_001_M10	CC1G_10710															YFL008W	SMC1	Subunit of the multiprotein cohesin complex, essential protein involved in chromosome segregation and in double-strand DNA break repair; SMC chromosomal ATPase family member, binds DNA with a preference for DNA with secondary structure					TGGAGAGACGGGAAGCTGGGGATTGAAATGAGTGTGGGGTATGTCAGGTAACGCTGTTGAAGTTGCAAAG
CC_OL_001_M11	CC1G_02545												+										TTTTGATATCAACCCAATCATCCACGACTTCGTCGCGCAACAAACAAAAACCCCAGTGCCCCCGGCATTG
CC_OL_001_M12	CC1G_02501														+								ACCTCCGACTGCCCGACTCCCTACACTGTTCTATAGGCAAAGTGCTCCTACTTGTTGCCCTTCAAACCTA
CC_OL_001_M13	CC1G_02496															YGL103W	RPL28	Ribosomal protein of the large (60S) ribosomal subunit, has similarity to E. coli L15 and rat L27a ribosomal proteins; may have peptidyl transferase activity; can mutate to cycloheximide resistance					GCATGATCGTCTCTCTGTTATTTCGCATGTTTTCCGTACGCATTATGAACCACTATGAGCCTATGCCCCA
CC_OL_001_M14	CC1G_02490							+								YDR402C	DIT2	N-formyltyrosine oxidase, sporulation-specific microsomal enzyme involved in the production of N,N-bisformyl dityrosine required for spore wall maturation, homologous to cytochrome P-450s					CCCTTCATCACAGTCTCAAACGTATGTATAGGCGATAAGCCCAGCGATCCAGGTATCAGATTCCTGGCAC
CC_OL_001_M15	CC1G_02453													+		YLR345W		Similar to 6-phosphofructo-2-kinase/fructose-2,6-bisphosphatase enzymes responsible for the metabolism of fructoso-2,6-bisphosphate; mRNA expression is repressed by the Rfx1p-Tup1p-Ssn6p repressor complex; YLR345W is not an essential gene					CGAGTGCGGCCACTCTTGTGGAGGCGAGGCATGCTCCTGTTGTGTAAATTGAGGTCAAGTCTTTTTTCAT
CC_OL_001_M16	CC1G_02524		+										+			YKL104C	GFA1	Glutamine-fructose-6-phosphate amidotransferase, catalyzes the formation of glucosamine-6-P and glutamate from fructose-6-P and glutamine in the first step of chitin biosynthesis					CTGTTACCGTCGAGTAAGCGCCTCGCGGGAAGTGATCATGGAGGGTTTTTGGTTTTATGGACTGGTGAAA
CC_OL_001_M17	CC1G_02544																				0		ATGTCGCAGACTCTCAGGCTGTTGAAGAGCCAATCCCTCACCCAATCGAATCAGCATTCGCCAAAACCAT
CC_OL_001_M18	CC1G_02555															YDR452W	PPN1	Vacuolar endopolyphosphatase with a role in phosphate metabolism; functions as a homodimer			8		GTTATCCTCGGACATCTGTTTGGGCACATGAACGTCGACCACTTCTTCTTCCTGGAGGAAATAGACCTTC
CC_OL_001_M19	CC1G_07689															YDR148C	KGD2	Dihydrolipoyl transsuccinylase, component of the mitochondrial alpha-ketoglutarate dehydrogenase complex, which catalyzes the oxidative decarboxylation of alpha-ketoglutarate to succinyl-CoA in the TCA cycle; phosphorylated					GACTCTAACTCCCCTACTGTTGGGCCCATAGTTGTAATCCTTTCCTGTGTACCGTGAGCGACCACATCTA
CC_OL_001_M20	CC1G_07691																				0		TGAATTCCTCAGCCCTGTCAGCAACAAAAGAACCGACGAATATGGCGGTAGCTTCGAAAATCGAACCCGG
CC_OL_001_M21	CC1G_07727										+		+		+	YDR381W	YRA1	Nuclear protein that binds to RNA and to Mex67p, required for export of poly(A)+ mRNA from the nucleus; member of the REF (RNA and export factor binding proteins) family; another family member, Yra2p, can substitute for Yra1p function					CGCCTAATCATTACTCTTGTCGCTATGTATACCCTATTGTCGTCAGCCGCTGTATCCGTGCATTCCTCCC
CC_OL_001_M22	CC1G_07728				+											YML008C	ERG6	Delta(24)-sterol C-methyltransferase, converts zymosterol to fecosterol in the ergosterol biosynthetic pathway by methylating position C-24; localized to both lipid particles and mitochondrial outer membrane			7		GAAGAGGACAACAATGCCCGCCTCGACAAGTACACTGATGTCGTCAACGGTTACTATGATGGTGCTACCG
CC_OL_001_M23	CC1G_07730																						CGCAAAGAACATCGGGTGTGATCCGAAGGAATTCCCTACTGCTGCCTATATCGAGACATACAAAGAGGCG
CC_OL_001_M24	CC1G_07669												+		+	YER021W	RPN3	Essential, non-ATPase regulatory subunit of the 26S proteasome lid, similar to the p58 subunit of the human 26S proteasome; temperature-sensitive alleles cause metaphase arrest, suggesting a role for the proteasome in cell cycle control			4		ATGCTCATAGAAAGGAGCTAGCCGCCGTTGAGAATGCTCGTGAAAGAGAGAAGGAGTTGGCCAAAGGCAT
CC_OL_001_N01	CC1G_07639										+		+		+								CTTGTTGTTTTATCATTATCATCTCCGGTGTAACAATAGCATTGTATTTTCTAATCTTATCTGTACCGAC
CC_OL_001_N02	CC1G_07622																				0		CTGTTCAGAGATTCTGTGATGAAGAAGATCTCCAAGACAATCGAGAAAATCCCGGGTCTGGGAAGCTTAC
CC_OL_001_N03	CC1G_07643															YER133W	GLC7	Catalytic subunit of type 1 serine/threonine protein phosphatase, involved in many processes including glycogen metabolism, sporulation, and mitosis; interacts with multiple regulatory subunits; predominantly isolated with Sds22p			7		CCCATTCTGCTCGAGCTCGAGGCTCCTATAAAGATTTGTGGTGACATTCACGGCCAGTATTATGACCTGC
CC_OL_001_N04	CC1G_07664																				0		ATAATGTTGCTTCTCTTCGGGGAGAGTGGGGCGGTCAATTCAACCTTTATCCGCACAACTGTTGGGCGAT
CC_OL_001_N05	CC1G_11074																				0		CACCCTCATCCTGCAGCGCAGGACCGACGGGCGATAACATGTTCCAATGGCAAGCAACAATTATGGGACC
CC_OL_001_N06	CC1G_15192		+													YOL100W	PKH2	Serine/threonine protein kinase involved in sphingolipid-mediated signaling pathway that controls endocytosis; activates Ypk1p and Ykr2p, components of signaling cascade required for maintenance of cell wall integrity; redundant with Pkh1p			0		ACGGCGCAAATGATCGATGCAATTAACCTGATGCATGAAGCGGGTGTGGCACACCGAGATATAAAACCGG
CC_OL_001_N07	CC1G_11064															YPL037C	EGD1	Subunit beta1 of the nascent polypeptide-associated complex (NAC) involved in protein targeting, associated with cytoplasmic ribosomes; enhances DNA binding of the Gal4p activator; homolog of human BTF3b					CCATCGCCATTCTTGCTATCTACCCTTTCTTCGACGCGTCGTCTTCTCTCCTTCGAACCCTTTTCTTGTC
CC_OL_001_N08	CC1G_03588																						GGTGTCTGTGCATTGACGGTTGTCCAGAGCTTTTTGATTCGATGAGGTGTACGTTGGATATCCCTTCCCC
CC_OL_001_N09	CC1G_03582															YMR092C	AIP1	Actin cortical patch component, interacts with the actin depolymerizing factor cofilin; required to restrict cofilin localization to cortical patches; contains WD repeats			0		TCATCGAAGTATTCCGATCCAACCAGAAACTCTACTCTCTTGCTCCCAAGGCGTTCAAACCCACCGCCAT
CC_OL_001_N10	CC1G_03570																						ATCTATGTATCTATTCACGTTACGCGAGGGAAGGATTGGCCGGAGCTCGGTTCTTTGGGGGATACACTTG
CC_OL_001_N11	CC1G_03502		+																				TTACTTAGCGCAGTGGGCTATCGATTGGCGTGTCTCTGCATCGGTTTATCATCGCTCGGACGGTTGTAAA
CC_OL_001_N12	CC1G_03512	+													+	YMR002W	MIC17	Mitochondrial intermembrane space cysteine motif protein; MIC17 is not an essential gene					GGTCGATGATGATTCGGGACCTTGTGTGTACGACCCCTTTGCAATGCCATCTCTCTAAATACCACCACTC
CC_OL_001_N13	CC1G_03552		+		+																7		CAGCCTTATCCTCAGTAACACTGCCTATCTGTACCTGAGCGCCTTTACCCCAGTGGCAATCCTTCTCATT
CC_OL_001_N14	CC1G_03559		+																				TGTGACGGCTTTGGTTAGCAGACAAAGAAACAAATTGTAACATTAGGAACAGGAATGAAACTTCTTGCGC
CC_OL_001_N15	CC1G_08610															YLR075W	RPL10	Protein component of the large (60S) ribosomal subunit, responsible for joining the 40S and 60S subunits; regulates translation initiation; has similarity to rat L10 ribosomal protein and to members of the QM gene family					ACTGCAAAAACAAGCCGTACCCCAAGTCGAGGTACAACCGTGGTGTTCCTGATCCCAAGATCAGGATCTT
CC_OL_001_N16	CC1G_15207											+		+							8		TCGCCTACGGTCTTCTCCTTACCGCCTCCACTGTTGCTCTCGTTTGCATCATCAAGGAGACCACCTTCTT
CC_OL_001_N17	CC1G_08560															YHR170W	NMD3	Protein involved in nuclear export of the large ribosomal subunit; acts as a Crm1p-dependent adapter protein for export of nascent ribosomal subunits through the nuclear pore complex			3		ATCCTCGTGAAGAAGGCGTATCCCAACAGGAGGAAGAAGCACAGCAACAAGGCTAGGAACTGGAAGTTGA
CC_OL_001_N18	CC1G_08563																				0		AGTCAATCTCACGATATTCTCCCGCCTCAACCTCGGTCTTCCGAATGTATCCCCCGGGATTTTGTTCGAT
CC_OL_001_N19	CC1G_08517															YDR331W	GPI8	ER membrane glycoprotein subunit of the glycosylphosphatidylinositol transamidase complex that adds glycosylphosphatidylinositol (GPI) anchors to newly synthesized proteins; human PIG-K protein is a functional homolog			0		GTAACGCACGAAACAGGTTCCCTGGTAGTGTATTCGCCAACTCGCGGAAAGACTTGGACTTGTATGGGGA
CC_OL_001_N20	CC1G_08523																				0		AATCCCAGGGATACCTCTCAGATCTTCAAGTTCCCGTTCTCGAGCTGTTATGATGAAAATTCGACACAGG
CC_OL_001_N21	CC1G_10563																						CATGAGCGTTACCCACCCCTTTCCACTCTGCACGGCATTCGTCAAAATAGCATATTCACGACACCTTCAC
CC_OL_001_N22	CC1G_01242																				0		ATTTTGGAGACACTTCGAGGTACACGGCTTATCCACGGTCCGGATAATCGAGTGGAGTACTGCATCAAAG
CC_OL_001_N23	CC1G_01242																						ATGATCGAGGACATGGCTAGTGTCATCTATGGAGTGCGGGTGTCGAAGAAGGAAACTGCAGAGAAAGGCA
CC_OL_001_N24	CC1G_01239	+														YLR195C	NMT1	N-myristoyl transferase, catalyzes the cotranslational, covalent attachment of myristic acid to the N-terminal glycine residue of several proteins involved in cellular growth and signal transduction			1		GTGGTCATTCCCACTCCTGTATCGGTTTGCAGATATTACCATCGGTCACTGAACATCCCGAAGCTGGTTG
CC_OL_001_O01	CC1G_01237																				0		GGGTGCTCTGCTTTAGAAATGGCGGAGAGTATGGGAGTGCCTAAGAGGATCGGAAAGATGTCATTCTCCT
CC_OL_001_O02	CC1G_13893												+		+								AGGACCAACACATTAACCAGCATCAGTTCCACCAATTCCTCCTCGAGGGTCATACAAGTCAAGCGGCCTA
CC_OL_001_O03	CC1G_01236										+		+		+						3	ubc9	TAACGTCAACGACCCCGCCCAAAGCGATGCTTACACGATGTTCAAGAATGACCGAGTGGCATACGAGAA
CC_OL_001_O04	CC1G_01233																						CTCGCTGTGCAAAGAATCTCGGCCAACCAGTCCGGTATTGAGAACAAAAAATGGAAGAAGGACCAGTTCT
CC_OL_001_O05	CC1G_01231																						CGGGCATGGCAATGGACGGAAACGATGTCTGGGTCACCTCTGGCCCTTATCTTATCAAGTATTTAAGAGG
CC_OL_001_O06	CC1G_01231															YLR409C	UTP21	Subunit of U3-containing 90S preribosome and Small Subunit (SSU) processome complexes involved in production of 18S rRNA and assembly of small ribosomal subunit; synthetic defect with STI1 Hsp90 cochaperone; human homolog linked to glaucoma					TTACGAAGAGTTCTTCAACTACGCCAAAACACTATCCCCTGCTGCTCTCGATCTGGAGATCCGCCAGTTG
CC_OL_001_O07	CC1G_01228	+																			0		TGAACACTAAGAATCCTGTATCCAAGTTCAAGGTTTCAAGAGCAGCAGCCGGGCGACCTTCAGACTCGGT
CC_OL_001_O08	CC1G_13891																				4		TGGTGACCGTGCCTACGAAATCACCACGGAGGTGCTACCCGACTGCGACGCATCTTCGTCTAGCTCTATT
CC_OL_001_O09																YOR145C	PNO1	Essential nucleolar protein required for pre-18S rRNA processing, interacts with Dim1p, an 18S rRNA dimethyltransferase, and also with Nob1p, which is involved in proteasome biogenesis; contains a KH domain			3		GGCTCATTCCAAAACATCAAGATTGCTCGAGACGCCATTGTATCCCTTATCCTTGGTTCACCTCCCGGCA
CC_OL_001_O10	CC1G_01223															YDR305C	HNT2	Dinucleoside triphosphate hydrolase; has similarity to the tumor suppressor FHIT and belongs to the histidine triad (HIT) superfamily of nucleotide-binding proteins			0		CTTCTCAGAAAACAACGACGCCATCTATCCAGAACTCGAGAAAGCAGAAGCGGGCCTCTCTTCAGACATG
CC_OL_001_O11	CC1G_13890																				3		CGTTCTCTCAGACCGGCCTCAAGCCTTACAACGCGATCACTATGGTCTGGGCGCCTCAATGGCGCTGTAG
CC_OL_001_O12	CC1G_01214																						ACGAGACGACTCGCGACGAAATCACTAATCTTATGGAGAAACTGAAAGCCGAGTATTCCCATCGAGATCA
CC_OL_001_O13	CC1G_01213																				3		TCGCAGATAAAGATTCCGTAGAAGCTATCGCTGAAGTCGTTAAAGAGGAATGTGGCTCCATGCTCAAGGA
CC_OL_001_O14	CC1G_13886												+			YFR018C		Putative protein of unknown function			0		CGACGCGACAACTGAAATATCCACCATTGAACACTTCATTCTTCTGGATTTGCTGGGGGCCAAGCAACCG
CC_OL_001_O15	CC1G_13883																				2		CACTGAGTGAACGACAAGCCGCTGACTACATGATGGGGGTAATTCGGAATGCGCATGAGAATGTTCGAAG
CC_OL_001_O16	CC1G_01200															YMR028W	TAP42	Essential protein involved in the TOR signaling pathway; physically associates with the protein phosphatase 2A and the SIT4 protein phosphatase catalytic subunits			0		ACCCCCATCACCAATTCTCACTGCTGAGGCAATGAGCCAGGATGACAGGATTAAAATGCGACAGGAAGAG
CC_OL_001_O17	CC1G_01198	+														YPL023C	MET12	Protein with methylenetetrahydrofolate reductase (MTHFR) activity in vitro; null mutant has no phenotype and is prototrophic for methionine; MET13 encodes major isozyme of MTHFR			0		GAGTTGTCCCAGCCGTCCAAAATAAGCTTATCGCAGATTCTCCAGATGCTCTGAGCCAGAACACCTTGGA
CC_OL_001_O18	CC1G_01195																				9		TATTCAACACGCCTCTGACGGAGCAAGGCATCGCAGGTTTTGGCATCGGTCTTGCCGCTATGGGACAAAC
CC_OL_001_O19	CC1G_01191															YPR066W	UBA3	Protein that acts together with Ula1p to activate Rub1p before its conjugation to proteins (neddylation), which may play a role in protein degradation; GFP-fusion protein localizes to the cytoplasm in a punctate pattern			3		TACCGTCGACCAGCTCATCGACCTTCTAGTTGAGCGACAGGACATTCAAATCAAGAAACCGTCTCTCTCG
CC_OL_001_O20	CC1G_01189																				2		ACTTGCGTTGGGAAGCCTTGCAGCATACATTGCGGTAGTCGGGCAACCTTTCTTTCAGTTTGTCTTGGTG
CC_OL_001_O21	CC1G_01188															YMR227C	TAF7	TFIID subunit (67 kDa), involved in RNA polymerase II transcription initiation			0		GCAGTTATTGAACGAGGAAATCAGGGACCTCCAGGCCGCTGTAGCTAAGAAGGAGAATGAGATTACCAGC
CC_OL_001_O22	CC1G_01186												+			YDL087C	LUC7	Essential protein associated with the U1 snRNP complex; splicing factor involved in recognition of 5' splice site; contains two zinc finger motifs; N-terminal zinc finger binds pre-mRNA			0		AACTTCGAAACATGCTGGCTAAATTTAAAGAAGAACGGGAGAAACGCAAAACCGCGCTTGGTGGAGGGCC
CC_OL_001_O23	CC1G_01185											+									8		ATGCAATTGTACAAGCCGTGAAAACGAATGGACCTGCATCAACGGAGGTGGATATCATCGTTACCGCCGC
CC_OL_001_O24	CC1G_01181															YDR375C	BCS1	Protein of the mitochondrial inner membrane that functions as an ATP-dependent chaperone, required for the incorporation of the Rip1p and Qcr10p subunits into the cytochrome bc(1) complex; member of the CDC48/PAS1/SEC18 ATPase family			3		ACCAAATCGATGCAGCTAATGTCCGGAACGCCTTGGGAGACCGTGACCCTCACCACTCTCTCTCGGGATC
CC_OL_001_P01	CC1G_01177																				4		ACTCCTACTGGGATGGTAGCGGACACAGGAAGAGCGTTGTGTGCAAGAAAGGTGACAGTATTGCAACGTT
CC_OL_001_P02	CC1G_01176															YEL051W	VMA8	Subunit D of the eight-subunit V1 peripheral membrane domain of the vacuolar H+-ATPase (V-ATPase), an electrogenic proton pump found throughout the endomembrane system; plays a role in the coupling of proton transport and ATP hydrolysis			0		CGATTCATTCAGACCGCACAAGACATATCTACTGACGGAGGACCCCAGATTAAAGAAGGTGCAGGCCAAG
CC_OL_001_P03	CC1G_13878																				0		ATGCTAGGTGGCCTGAATGCTCTAGATGTTCCTGAAAGTTCTCGCCATCCGGGACTTCCTAAATCTACCC
CC_OL_001_P04	CC1G_01172																				0		AGTATACTTTGAAACGCACGATAATTCGAGCTGGCGACGAAGAAACCGCGACGCCCACCAACATCAGTTC
CC_OL_001_P05	CC1G_01171															YBR105C	VID24	Peripheral membrane protein located at Vid (vacuole import and degradation) vesicles; regulates fructose-1,6-bisphosphatase (FBPase) targeting to the vacuole; promotes proteasome-dependent catabolite degradation of FBPase			0		TTCAAACATGTGAAGCAGGAAGCGAAGCGGCCACATTTGACAATAGACGACCGTGACCGGGGTGCTGTCT
CC_OL_001_P06	CC1G_01170																				0		ACGAAGCAGCACATCCCCTATCGGGAACGGAAGAGTCTCAGCGGAACCGCGCGGTACATGAGCATCAATA
CC_OL_001_P07	CC1G_01166																				0		CGCACAGCATGCCGATAGACAATTGAATTTCAGAGTAAACAACCCCAACTACTTTACCGTTGCGTTCTCC
CC_OL_001_P08	CC1G_13873																				0		AAATCTACTACTATTGATTTGAAGCTCGTCGGTGGAGCGGCGATCTTTGGAATTGGCTGGGGCTTGGCTG
CC_OL_001_P09	CC1G_01163															YBR213W	MET8	Bifunctional dehydrogenase and ferrochelatase, involved in the biosynthesis of siroheme, a prosthetic group used by sulfite reductase; required for sulfate assimilation and methionine biosynthesis			0		AGCTTGTCGAGCACGCCGTATACCCGTGAACGCAGCTGATATCCCTGACCTCTGCGATTTCTACTTTGGA
CC_OL_001_P10	CC1G_01162											+				YPR114W		Putative protein of unknown function			7		TATCCACGGTGTGGCATGCACCCTCATTTACAGCATGTCGTTCCGACCCTTTGTTGCTTATTACGGAACG
CC_OL_001_P11	CC1G_01160															YDR027C	VPS54	Component of the GARP (Golgi-associated retrograde protein) complex, Vps51p-Vps52p-Vps53p-Vps54p, which is required for the recycling of proteins from endosomes to the late Golgi; potentially phosphorylated by Cdc28p			0		GGATTGATTTACCCAGTCAGCAGGCCAAGGAGCGGTTGCTTGAAGATGCGCGATATTTGCACCAGCATTT
CC_OL_001_P12	CC1G_01158																				8		AGCTCCGCCCTCAGAAAGTCATTGGGACGCGATCCATACTACCTTCCATCTGCTTCAAATCACTGGTCTC
CC_OL_001_P13	CC1G_01157																				0		TATTTGCATCGTGTTCAGATGACCATACCATTCGGATTTGGGAAGCACCTCCGCCGGAAACGTTACCAGC
CC_OL_001_P14	CC1G_01155																				0		CTTGACCGCCTACTTTACCTATGCCGACCTCCCACACCTCCCCACTGTCGACTGCGACGAGCTTTTGAAG
CC_OL_001_P15	CC1G_01153															YLR289W	GUF1	Mitochondrial matrix GTPase that associates with mitochondrial ribosomes; important for translation under temperature and nutrient stress; may have a role in translational fidelity; similar to bacterial LepA elongation factor					AACTCCATAAAGTAATCCCGAGACAATTATTCGAGGTCCCTATCCAGGCCGCCATCGGACGCAAGGTCAT
CC_OL_001_P16	CC1G_01149																						GGTGCACTCGTACATTTAAGGGATACCATGGGACATACTGCACTCTACTATGCTGCTCGACAAGGGCATG
CC_OL_001_P17	CC1G_13869															YGL142C	GPI10	Integral membrane protein involved in glycosylphosphatidylinositol (GPI) anchor synthesis; putative alpha 1,2 mannosyltransferase required for addition of the third mannose onto the GPI core structure; human PIG-Bp is a functional homolog					CCGGGCAACCGGGAATTCAGAACTGGAGGCACGAGTGGCCCAAACATCTTATTCTATTTGGTGATCTTCT
CC_OL_001_P18	CC1G_01141															YDR374C		Putative protein of unknown function					TCTTCCACACCCACCCAGCTAGGACTTCGTTACTTCAAGACTTTGCCTTCTACGAGTTGCAAGCGATGCA
CC_OL_001_P19	CC1G_01140																				0		CTGGGACCGCCGTTTCCGGATCCGCTTAAAACTTTCAGCCATTCCACGACGAATCATTAAAGCCATGGAA
CC_OL_001_P20	CC1G_01137															YOL143C	RIB4	Lumazine synthase (6,7-dimethyl-8-ribityllumazine synthase, also known as DMRL synthase); catalyzes synthesis of immediate precursor to riboflavin			0		TCCAATACGACGGCTCGTCGCTGCGAATTGGCATTGTTCACGCTCGATGGAATAAAGTGGTCATCGACGC
CC_OL_001_P21	CC1G_01136															YML121W	GTR1	Cytoplasmic GTP binding protein and negative regulator of the Ran/Tc4 GTPase cycle; component of GSE complex, which is required for sorting of Gap1p; involved in phosphate transport and telomeric silencing; similar to human RagA and RagB			3		TGAACAAAGACCTGGAGTATTATCGGGATTGTCTGGAGGGATTGCGACAGTTTAGTCCCGACGCTGCTGT
CC_OL_001_P22	CC1G_01133																				4		GTGGCGGAAATTGCATCCCGATCTTCAGCACTACACATATTGGAGCTACCGCTTCCAAAGCCGTGAAAAG
CC_OL_001_P23	CC1G_01130																				3		GTTCGTACTCAAATAGACGCGCTCCAACGTAAGATGGACAGGTGTACGAGGGATGCATCAGCAGCATTGA
CC_OL_001_P24	CC1G_01128																				0		ATGTCGAGTAAATACTTGGATGATGAAGATGAAGGTATACCCACGTATGAAGAGCTCGAACGGGTCCTCG
CC_OL_002_A01	CC1G_01122															YGL076C	RPL7A	Protein component of the large (60S) ribosomal subunit, nearly identical to Rpl7Bp and has similarity to E. coli L30 and rat L7 ribosomal proteins; contains a conserved C-terminal Nucleic acid Binding Domain (NDB2)			0		ACCCAAACTCTACTTCGTGATCCGTATCAAGGGTATCAACGAAATTGCTCCCAAACCCCGCAAAATCCTC
CC_OL_002_A02	blank																						0
CC_OL_002_A03	CC1G_01121												+			YNL036W	NCE103	Carbonic anhydrase; poorly transcribed under aerobic conditions and at an undetectable level under anaerobic conditions; involved in non-classical protein export pathway			0		AGCTCAAATTGGACGACTACAATGCCCTGTCCGTCCTTCGCTATGCTGTCGACTATCTCGGTGTAGAACA
CC_OL_002_A04	CC1G_01120																				3		CCGTCCTCGACAATCCCAACCATTCCTTTACCAGCATCTTACAAGCCCACTCCAGACCCTCGTGCCAACC
CC_OL_002_A05	CC1G_13867															YJL054W	TIM54	Component of the mitochondrial Tim54p-Tim22p complex involved in insertion of polytopic proteins into the inner membrane			0		GAACAACATGGGTACCGAGCAGCGAGCCAAGATGCTCGCTCGACAACAAAACCGAGATATTTCGGAAAAG
CC_OL_002_A06	CC1G_13865															YJL054W	TIM54	Component of the mitochondrial Tim54p-Tim22p complex involved in insertion of polytopic proteins into the inner membrane					ACCTCATTAAACCTTCCGCGTCAGTCGAATGGGATGAAAGACTTCGGGACGCATTGCGCGTATTCACAGA
CC_OL_002_A07	CC1G_01116															YBR135W	CKS1	Cyclin-dependent protein kinase regulatory subunit and adaptor; modulates proteolysis of M-phase targets through interactions with the proteasome; role in transcriptional regulation, recruiting proteasomal subunits to target gene promoters					GCTGCCCTTCAAGCTGCCGCTCAGCAAAAGGAAATGTCGCGTAGACTCGAAGAGTACATCGAAAAGATTC
CC_OL_002_A08	CC1G_01110															YER007W	PAC2	Microtubule effector required for tubulin heterodimer formation, binds alpha-tubulin, required for normal microtubule function, null mutant exhibits cold-sensitive microtubules and sensitivity to benomyl			0		TTGGTGATGTCGCCAAAACGCTCGGGGATGTGCAAGAAGGAACTCTCCCATTCAGATGGCATGAACTTTG
CC_OL_002_A09	CC1G_01103																				5		ACAAAGCCTTTGACTTCAGGAAGCTTGCCTCCGGACGAGTGTGCCAGACCTTATTTACATGAGTTTCTGG
CC_OL_002_A10	CC1G_01100															YGR093W		Putative debranching enzyme associated ribonuclease; green fluorescent protein (GFP)-fusion protein localizes to the nucleus					TCGTTAGTCTTGGAGCATTTGGCAATGATGGGGGTGCAGGTAAAAAGCAGCGGTGGTTCTACGCATTCAC
CC_OL_002_A11	CC1G_01097																				0		AAGCGAACAGGATCCGTGAACAATTGGCGCTAGTTGAGGAAGACCACAAGCAGGCTATCCAACAGGTGAA
CC_OL_002_A12	CC1G_01095	+																			3		TGTCGGCAAAGCAGGTCGCCTATCGCAATAATACTTCTCTTGCCAGTCTCTTATCAGACCTGAGGCAGGA
CC_OL_002_A13	CC1G_01094															YBR234C	ARC40	Subunit of the ARP2/3 complex, which is required for the motility and integrity of cortical actin patches			0		AGAACAATTGGTGGGTCGCGAAACAGCTTAAGAAGCCCATTAGGGCTACCGTGTTGTCCCTCGACTGGCA
CC_OL_002_A14	CC1G_01092																				0		AGGATACCCCTCGGGAAGCATACACCAAGATGTCGTATCTGGGAACGGAGGAATTCGTACTAGTGTTCTC
CC_OL_002_A15	CC1G_01090																						ACTGCACAATAATCGTGCCCATCCCATATGCCCAAAACTTAAATCCCATGCAACCGTTCCCGCAAGAGCC
CC_OL_002_A16	CC1G_01088																				0		GGGAGTGAACCCCACATTGAACTCAAACCCCATACCGTCACTGTCATTGATTTGGACCCGAAGAGTATGG
CC_OL_002_A17	CC1G_01087																				0		CGGTTGTATACCGTTGGTGCTGGAACGCAGGAGATTCGTCGTATGCTTATCGGGCGAGAGTTTAATGAAC
CC_OL_002_A18	CC1G_01085												+		+						0		TATCTACAACACGAGCGAGAGGTGGGAGATTCGTGCACACCGAGAACGGGCGGAACGATGGCGAAAGAAC
CC_OL_002_A19	CC1G_01082															YJR121W	ATP2	Beta subunit of the F1 sector of mitochondrial F1F0 ATP synthase, which is a large, evolutionarily conserved enzyme complex required for ATP synthesis; phosphorylated					GATGTCAAGGCCAAGGCTGAGCAACTCGCCAAGGAAATGGGCAACTAAGTGGACTCATTCGTTTTCGTAG
CC_OL_002_A20	CC1G_01081												+		+						0		GCGTTGATAGTAGTTGGATCAGTTTGCAGAGTTTGAAGTCGGATGACCCTTCCGTCGACACTCCCACTGT
CC_OL_002_A21	CC1G_01077															YNL104C	LEU4	Alpha-isopropylmalate synthase (2-isopropylmalate synthase); the main isozyme responsible for the first step in the leucine biosynthesis pathway			0		TTCCGCTCCCATTACCACTTTGGCTCCAAGTACGCTGGTCGCTTGGTTCTTAGGAACTTCAAGATCTCTG
CC_OL_002_A22	CC1G_01076															YDL149W	ATG9	Transmembrane protein involved in forming Cvt and autophagic vesicles; cycles between the phagophore assembly site (PAS) and other cytosolic punctate structures, not found in autophagosomes; may be involved in membrane delivery to the PAS			0		GTTTAACTTTGAGAGGCATGGAAATGTGAAGTTCGGCGCACCGGCGAAGGCAAAGGACAATCGCATGATC
CC_OL_002_A23	CC1G_01075																				0		GTCTTCGAGCAGCAAGAAGTATGTCCACCCATTCGTATATCAAAGCCTCAAGCACGATCCCATGGTCTCG
CC_OL_002_A24	CC1G_01074															YOL009C	MDM12	Mitochondrial outer membrane protein, required for transmission of mitochondria to daughter cells; component of the Mdm10-Mdm12-Mmm1 complex involved in import and assembly of outer membrane beta-barrel proteins			0		GGTTTTCAATGGGGAGCTAGCGGTAGCATACGAAGGACAACGGAGGAGAGTGCATGTATGTATCCTCGAC
CC_OL_002_B01	CC1G_01071																				0		CCTCCCGAGGTCCAAATGTCAGCGGACCAAATCCGGGCGGGCCTCAACAACGTAGCTTCCGCTCTGAACG
CC_OL_002_B02	CC1G_01066	+																			3		ATCCTGGACTGGCATCACTCTCGAAAGCTGATGTCGAGGTTATCGTTCATGAATTCGATATCCCGAAAGC
CC_OL_002_B03	CC1G_01062																				0		GCTATGACACATTCACTCAACTAGGAGCAGGATATTACGGCGAGAAGGGAATGGTCATCATGACTCAAAC
CC_OL_002_B04	CC1G_01060																				0		AAACTCTCCATACCCGCCATCCTCTATGTGATCCAGAACTCGCTCCAGTTTGTCGCGATCAGCAACCTCC
CC_OL_002_B05	CC1G_01055															YFL009W	CDC4	F-box protein required for G1/S and G2/M transition, associates with Skp1p and Cdc53p to form a complex, SCFCdc4, which acts as ubiquitin-protein ligase directing ubiquitination of the phosphorylated CDK inhibitor Sic1p			0		TATCAGACGCTTTGTGACGATGCAGGATGACGACGAGGAACAAGCTGACATTGATGCAATGGACCAGGAC
CC_OL_002_B06	CC1G_13861																				3		GCCTGATTTCCATCGTGCCATGTCCTCAGATGGGTCCAAAGCCATGTATGCCAGATTCCTAGAACAGCTT
CC_OL_002_B07	CC1G_13860																						CTACTTCCATTGATATCTGGGACTTTGGTGAGGTGGAGAACGAGCATGTCGACTGTGCCGACGAAGATCC
CC_OL_002_B08	CC1G_01049																				0		TGGTTCCTTCATCCCTCTCGTAACTCTTTCTTCTTTGGTGGAAGATGCATGACCGGCGGGGACAATCCTT
CC_OL_002_B09	CC1G_01048																						CCTCGCCCTCGTACAGTACCACACCTTTATCCGAAGGAAGGATGCTGAAGCTCAAGGCAAACTGAAAAAG
CC_OL_002_B10	CC1G_13856																				0		CCTGCGTTTGTTATCGAGGAGGATATCGTTAGTCTTGCGGAAGCACAGCGTATGACGAGTGTGTATGCGA
CC_OL_002_B11																YKR090W	PXL1	LIM domain-containing protein that localizes to sites of polarized growth, required for selection and/or maintenance of polarized growth sites, may modulate signaling by the GTPases Cdc42p and Rho1p; has similarity to metazoan paxillin			8		TACGAGGTTTATCGATTTAACTGGGGGCGCTGGGAACAATAACGACCCTGCTGCCCAGGATAGTGATAGT
CC_OL_002_B12	CC1G_01044																				0		GAGGACTGTACTACTGTTGGAGGAGAATATTGCGCTTCTGAAGATGGTGCAACCCATGCGCCGAACTTTC
CC_OL_002_B13	CC1G_01043																				0		GCTACATCCGAGAGCCTCACGAAAAATCGACTGCCAAAACAAGCCCCCCTATCATCATCGACACCATTAG
CC_OL_002_B14	CC1G_01040															YPL218W	SAR1	GTPase, GTP-binding protein of the ARF family, component of COPII coat of vesicles; required for transport vesicle formation during ER to Golgi protein transport					AACTTGCCATTGGGAACGTCAAGTTCACAACCTATGATTTGGGTGGACATCAACAGGCCCGCCGCCTCTG
CC_OL_002_B15	CC1G_01039															YJR013W	GPI14	Glycosylphosphatidylinositol-alpha 1,4 mannosyltransferase I, involved in GPI anchor biosynthesis, requires Pbn1p for function; homolog of mammalian PIG-M			0		CCTGGGAGAGAATGTTTACTTCCAGCTCTGGATTCGAGGTTTGATCTATGTCGTCGGCAACTGCTGGGTA
CC_OL_002_B16	CC1G_01036																				0		CTTGACGTATACGAGAATGTGCCGATCGCGTATGAGAAGGAGTACAAGGCGGTGGAATTTGGTCCTTTGG
CC_OL_002_B17	CC1G_01034												+			YBR132C	AGP2	High affinity polyamine permease, preferentially uses spermidine over putrescine; expression is down-regulated by osmotic stress; plasma membrane carnitine transporter, also functions as a low-affinity amino acid permease					TTCTCGTATACCATGATCGTGGTCTGTCCCCTCCTTTTCTTGTACTGGAAACTCCGGCACCGCAGTCAAT
CC_OL_002_B18																							CTCGAAGATAATGAACTGGAAATCCCACCATACATGATCCCTCCAAACCCAGACGACTCGGATAGTGCTC
CC_OL_002_B19	CC1G_01027																				0		ACAGGGCACCAATACCCGCGACCTAACGCTAGACTACGACTCTGACGATGCACGGCGAGACCTCTACAAA
CC_OL_002_B20	CC1G_01025																						TTGAAGCGCCGGGCAACGACATATCATAGGGTACTCAACGAGCAAGACCAGCGAATTGAGAATGCCAACA
CC_OL_002_B21	CC1G_01021															YPR200C	ARR2	Arsenate reductase required for arsenate resistance; converts arsenate to arsenite which can then be exported from cells by Arr3p			3		TCTGACCTTGTTGCGTATGTCAATTGCATCGCTGGAGCGGTTACCGAAGAAGAGTATCGCCAGCACATGG
CC_OL_002_B22	CC1G_01018															YDL238C	GUD1	Guanine deaminase, a catabolic enzyme of the guanine salvage pathway producing xanthine and ammonia from guanine; activity is low in exponentially-growing cultures but expression is increased in post-diauxic and stationary-phase cultures					TCAATATCAGGAGTGGGGTCGCGCCTATTGGGAAGTATTTGGACCGGGGTATCAAAGTTGGACTAGGAAC
CC_OL_002_B23	CC1G_01016																						ATCTTCGGCCAATACATCAACTACAGCTACCCACCATACACCCCAGAGTACACACTCCCTACCAGTTGGA
CC_OL_002_B24	CC1G_01015																				2		TGAAGTCGTGTTCTGCAGGTCCCGCTGGGCCACTTCAAGTTTTACCGACGAAGAGCTTGAGGTTTTGAAT
CC_OL_002_C01	CC1G_01014																				0		CCAACCAGAGGAAATCGTGCTATACAACGGACGAAAGGTGGTTCTGGACGAGGACTTAGAGTTCATGACC
CC_OL_002_C02	CC1G_01010																						GAGCGCTCTGTAATACCATTGTATATCTTGTCACTTCCTGAGCTCCCTGGACACCTCATACCGCGACACT
CC_OL_002_C03	CC1G_01006																				0		GACCCTATCAAGTATTGGTTTAAGCAGAAACAGGACGGCCACCCCCTTGCGCAAATGGCGCTAGATTTTC
CC_OL_002_C04	CC1G_01017																				5		AGTATAGCAACCGGGTGCCTAAACCAGTTATCGAAGCGGATTGTGTTGAGTGCCACAAGTGGGAGTTTGG
CC_OL_002_C05	CC1G_13852																				0		CCCCAAGTTCCTATACTTCAATATCTACGCATCTGAAATCGCCGACGGAAACACCAGCCCATCGAAGGAG
CC_OL_002_C06	CC1G_01022																				3		CCCCATGGGAACATGGACGACTTGTTTACAAAGTCCGGCGAAGAAGAGCTAACTGATGACACACTCTACG
CC_OL_002_C07	CC1G_01026																				0		CGTTCAAGATCCTCTTGCAGCAAGGTCAACTCGTTCCGGATGGGAAGAAGCAATTTGCGTGTATGGGGTA
CC_OL_002_C08	CC1G_01028																				8		TTTGTGCAGACGAATGTGTTGGATAATACCCCGTATGTTGCGCCTGGGACTGTTATGTCTGGGGATAGGC
CC_OL_002_C09	CC1G_01030																				0		AGGATCTCTATGAAAAGGGTGCGGAGTTGCTCGAGAAGACGGATTGGGTGCTGGCTGTGTTGAATAAGAG
CC_OL_002_C10	CC1G_01031															YER005W	YND1	Apyrase with wide substrate specificity, involved in preventing the inhibition of glycosylation by hydrolyzing nucleoside tri- and diphosphates which are inhibitors of glycotransferases; partially redundant with Gda1p			0		ACAACTCCGATCGTTCTTCCTTCGCTCCATGCACAATGTTGCCAAACGGGATGCCTATGCAGATCTCATG
CC_OL_002_C11	CC1G_13854												+		+	YPR103W	PRE2	Beta 5 subunit of the 20S proteasome, responsible for the chymotryptic activity of the proteasome			2		AGGCGTTCCTACATTCACCGTACCTGCACTTCCAGACCCTACTGCTTTCTTGAGACTCCATACAGACGAT
CC_OL_002_C12	CC1G_01038															YEL026W	SNU13	RNA binding protein, part of U3 snoRNP involved in rRNA processing, part of U4/U6-U5 tri-snRNP involved in mRNA splicing, similar to human 15.5K protein					ATGTCTGCCGAACACGGAAAAGCCTGGCCTCTGTCCGACGCTAATCTGACTAACCAGATTCTCGAGCTCG
CC_OL_002_C13	CC1G_01041																				0		ATGAAGCCCCATAATCTTCTTGGAGTGATGAAGCGGGATATCGAGATGGTGCTGAAGCCCCGAGTTGTAC
CC_OL_002_C14	CC1G_01042																				0		TTGCTAATGCTGCTATCGTTTCGACGCACACTAAGAACAAGGCGACCCTCCATTACCCTGGCGTCTTCCT
CC_OL_002_C15	CC1G_01045															YDR063W		Putative protein of unknown function; green fluorescent protein (GFP)-fusion protein localizes to the cytoplasm and nucleus; null mutant is viable and displays decreased frequency of mitochondrial genome loss (petite formation)			0		ACGGGAGAAAGTCCTTCCCACTCGTGCTGATCAACTGGGCACCCGTATCCAGCGAAATCGGGTTGCTCAC
CC_OL_002_C16	CC1G_13859																				0		ATGAGTCGTTCATTCCCCAGACTTCTGGCTTACAGGTTCAAATTGCTCTTCCGGTTCCTGAGGCCCCTTA
CC_OL_002_C17	CC1G_01052																				0		GGTCTCAACGGTCCACACCTGGGTTCATATTCGTGATAACCGCGTTTTGTGCAATGGTGACTTTGTCGGC
CC_OL_002_C18	CC1G_01054																				0		ATGATGCCGGGAGACCCCTACTTACGACTGGCGCTCGTTAGTCCACGAGAAGATGTAAAGATTCACAAAG
CC_OL_002_C19	CC1G_01056																						GTACTCCCCTGATTCCCACTTCGTCCAGATCTCTTATGCCGTTTTAAGCTTGCTGAAGCTCATCCGTCCT
CC_OL_002_C20	CC1G_01059															YGR277C		Putative pantetheine-phosphate adenylyltransferase (PPAT) that catalyzes the fourth step in the biosynthesis of coenzyme A from pantothenate; conserved in bacteria, humans, and plants; essential for viability			0		TGCTCACCTGACGAGAGTTGAAACGCCACTTGACGAAAACATCGCACATGAAGCTTCTGCAGTTCCCTCA
CC_OL_002_C21	CC1G_01061																				0		CTTGCGAAATCTTCTCATCCATGATGGTCAATGCTGGGGTGTCGGCGAGCAACTGTGCTCGAGTGTTCAA
CC_OL_002_C22	CC1G_01064																				0		TTGTCCATTTCGACATTTACAACGATAGAGCAGGCCCTCGCCGCCTACCAGCTACTTATACCGCAAGAAC
CC_OL_002_C23	CC1G_01065		+																		0		CGTTGTTAATGTCCGACTCTCGTCGTTCATTCTCGACAAGGCACCCTCGGTGGTTGGAAAGCACCAGGAA
CC_OL_002_C24	CC1G_01067															YMR080C	NAM7	ATP-dependent RNA helicase of the SFI superfamily, required for nonsense mediated mRNA decay and for efficient translation termination at nonsense codons; involved in telomere maintenance; potentially has E3 ubiquitin ligase activity			4		CACCCACTATAAGGAATCGAATGTCCTTGTCGAAGGCCCGTTGAATAACCTGCAGCCCAGCATGATTCAG
CC_OL_002_D01	CC1G_01073												+			YPL086C	ELP3	Subunit of Elongator complex, which is required for modification of wobble nucleosides in tRNA; exhibits histone acetyltransferase activity that is directed to histones H3 and H4; disruption confers resistance to K. lactis zymotoxin			4		GTCGGAACGAGAGATTATTACAGGAAGCTTGGGTATGAGCTCGACGGACCCTACATGAGCAAGATGCTCA
CC_OL_002_D02	CC1G_01078															YGL245W	GUS1	Glutamyl-tRNA synthetase (GluRS), forms a complex with methionyl-tRNA synthetase (Mes1p) and Arc1p; complex formation increases the catalytic efficiency of both tRNA synthetases and ensures their correct localization to the cytoplasm			4		TATCTACGATGGAGAGAAGGACGGTGTGAAGGAGTTCTTCAAGATTCCCGATGGAAAGGCCGCTGGTATC
CC_OL_002_D03	CC1G_01083																				0		CAAGATTTTACACTTCAATCACGTACCATCCTTCTCATGGGCCTCGACCTCATTCGCCCGTCCGTCAGAA
CC_OL_002_D04	CC1G_01084															YOR269W	PAC1	Protein involved in nuclear migration, part of the dynein/dynactin pathway; targets dynein to microtubule tips, which is necessary for sliding of microtubules along bud cortex; synthetic lethal with bni1; homolog of human LIS1			0		GCGCGAGTAGAGATCGGACAATAAGAGTATTCGATGTGGCTTCAACACACCAAGTTAGAACGCTGTCGGG
CC_OL_002_D05	CC1G_01089																				0		GAGATGGTTACGAGGACAGTGCCGTTCTATGGCCGCACCAAACTCCAGACTAATGCTTTAAAGGTGGAGA
CC_OL_002_D06	CC1G_01091								+		+												TTTATAGCTTTTTTGACGTGTAATCTTCTCGTTGCAGTGTCCGTATCCGTTTCGGCACCCGAGCGCACCT
CC_OL_002_D07	CC1G_01099																				8		GACGTTTCCATTCCACCTACCAGCACATTCTACATCTGGCTCAATCTGGAAAAGCTTCCCCCACCTCTCA
CC_OL_002_D08	CC1G_01102																				4		TTCCAGTTGGTGCTTGTGACCCTAGCTTCTGGGGTTCGGCGGTTCAGTATGACTATCAGTACTACAACCA
CC_OL_002_D09	CC1G_01106												+										AGGATGCTGGACGGAAGGCGTACATCGGCATGGGCTTTGTGGAGAGAACAGACAGTTTCGATTTCAATGT
CC_OL_002_D10	CC1G_01107																				3		AACTCAGCGCTCTCGGTGTCTACTCTTACGTTGATGCCGGCCACGCTGGATGGCTCGGATGGAATGCCAA
CC_OL_002_D11	CC1G_01108															YCL017C	NFS1	Cysteine desulfurase involved in iron-sulfur cluster (Fe/S) biogenesis; required for the post-transcriptional thio-modification of mitochondrial and cytoplasmic tRNAs; essential protein located predominantly in mitochondria			0		GGAAGCTGAACAGGGTGTTGACGAAGCTCGCAAGCACATGGCCGATATCATTGGTGCAGATATGAAAGAC
CC_OL_002_D12	CC1G_01109																						CGCTCTGACGATGTCTCTAAATTCTTTGAGGGCTATGGCCGTATCATCGACTGCCGTGTCATGACTGGTT
CC_OL_002_D13	CC1G_01111															YDR036C	EHD3	3-hydroxyisobutyryl-CoA hydrolase, member of a family of enoyl-CoA hydratase/isomerases; non-tagged protein is detected in highly purified mitochondria in high-throughput studies; phosphorylated; mutation affects fluid-phase endocytosis			4		TACCTGGGATTGACTGGAGAGTCTCTCAGTGGAAGAGCTGTATTTGAACACGGCTTAGCCACGCATTTCC
CC_OL_002_D14	CC1G_01112																				0		TATCATCGAGGATATCACCGAAATCATCACCTCCGTCCGCTCTGCATGTGACCCTCACGTTTTCTACTGG
CC_OL_002_D15	CC1G_01113															YAR007C	RFA1	Subunit of heterotrimeric Replication Protein A (RPA), which is a highly conserved single-stranded DNA binding protein involved in DNA replication, repair, and recombination			4		TTCGCCGGGTCAGATTTGGTATCTCTCGTCTGGCCAAGGTCGATTACAAGGAAGAAGCTGGTTATTTGCG
CC_OL_002_D16	CC1G_01114																				0		TTCGACAAAGGCGGAAACCGAGTGTGCAGATTTCGAGTTTATGGTGGGTAGGGAGTGGCTTAGTTGGGTA
CC_OL_002_D17	CC1G_01115															YLR389C	STE23	Metalloprotease involved, with homolog Axl1p, in N-terminal processing of pro-a-factor to the mature form; member of the insulin-degrading enzyme family			1		CCATACCCGCTCTCATCGAAGAGTACCCTGTGCCTGGAGAGAAACAAGTAGATAATAAGCCTTCGGCTAC
CC_OL_002_D18																						mer3	GCCTGTTTCGACGATTTCATGCAGACTGACGAGAACCTGGTCATCAGCGCCCCGACTGGGAGCGGTAAGA
CC_OL_002_D19	CC1G_01123																				5		ATACGGAGACTACGAATCAGTCGACGACCATGCCTACTATACGCGGCAGAGCTTCACGCGGGAAAGCATT
CC_OL_002_D20	CC1G_01124		+										+			YDL124W		NADPH-dependent alpha-keto amide reductase; reduces aromatic alpha-keto amides, aliphatic alpha-keto esters, and aromatic alpha-keto esters; member of the aldo-keto reductase (AKR) family			6		CTTGAACACTATTCTCAGCACCGCCGAAATTGTGCCCGCCGTTAACCAGATTGAACTCCATCCTTACGTC
CC_OL_002_D21	CC1G_01125																						GGCAGTGAGTTTCGCTGCGATCCTATTCCATGTGGCGTTCACGATCTGACATCTTTTGCTTGCCCAGTTT
CC_OL_002_D22	CC1G_01126																				5		AACGAATCACACAGGACAATCAGGATCGACCAACTATGGCCCTCAGCCTTCGCAGGTCTACAGCGGCTAT
CC_OL_002_D23	CC1G_01132															YFL044C	OTU1	Deubiquitylation enzyme that binds to the chaperone-ATPase Cdc48p; may contribute to regulation of protein degradation by deubiquitylating substrates that have been ubiquitylated by Ufd2p; member of the Ovarian Tumor (OTU) family			6		CACCGGACGAGTGGCACCAGAAGTTATTCCCTGTCAAACCCGGGAAAGACGATGACGATGCTATCATTGT
CC_OL_002_D24	CC1G_01135																				0		ATCCTTTCCATTGGAAGGAACCAAGGCGTCTGCATACAAGCGACGAAAGACGGAGGAGATGAAACAGTCG
CC_OL_002_E01	CC1G_01138															YKR092C	SRP40	Nucleolar, serine-rich protein with a role in preribosome assembly or transport; may function as a chaperone of small nucleolar ribonucleoprotein particles (snoRNPs); immunologically and structurally to rat Nopp140			4		GCCGCTGAAGCAGTGAAAAAGGCGGCCAAAGGGACCGTAGTCATCAAGGATGACATAGAATTAGAAGGTC
CC_OL_002_E02	CC1G_01139	+																					CGAATACTTCGACATCAATGTTTGGAGGGACGTCTTCGAGGTGTTCATGAATGATCCTCCGGCAGGGCCT
CC_OL_002_E03	CC1G_01142																				0		TGTTTGACTTTGGCAAGTACTCCCTAATGGGTGGACTCGCTGCTATGTATGCCTGGCGCAGCATCTATTG
CC_OL_002_E04	CC1G_01144																				0		CCTTCATTTTTCATGCTGGAGAAACACTGGGCGACGGGACCCATGCTGACTGCAATCTCTACGATGCAAT
CC_OL_002_E05	CC1G_01145	+														YBR233W	PBP2	RNA binding protein with similarity to mammalian heterogeneous nuclear RNP K protein, involved in the regulation of telomere position effect and telomere length					CAATTGCTCTATACTCGCCTTGAACAAGAGAAGCAAAAGCAGCTTCACTCAGCGCAACCGTCTGCTGAGG
CC_OL_002_E06	CC1G_01146												+		+	YOL077C	BRX1	Nucleolar protein, constituent of 66S pre-ribosomal particles; depletion leads to defects in rRNA processing and a block in the assembly of large ribosomal subunits; possesses a sigma(70)-like RNA-binding motif					ATGGTTCCGGAATTTCCAGATCGTCGAAAAGGATCCCCTACAGCCAAACGGGCCCCCTCAGACGTCGCTT
CC_OL_002_E07	CC1G_01147												+								0		GTTCCGCAAGTTCCCTGACGCTTCCACCCTATTCTCAACTTTATGACTCCAACGGGGAGAGGAAGATTGA
CC_OL_002_E08	CC1G_01148																				0		GGGAAGCGAGCTGCCATTAACTTGCTGACTCGAGAGGAGGCGGATGAAGAAATCAAGAACTACAAGATCC
CC_OL_002_E09		+																				trp1	GGACCTGTTATCCAGGAAGCAAACACTGTCGCACTTAAAAACGACATTGATTACCCTACTGTTCTTGGGC
CC_OL_002_E10	CC1G_01152															YLR291C	GCD7	Beta subunit of the translation initiation factor eIF2B, the guanine-nucleotide exchange factor for eIF2; activity subsequently regulated by phosphorylated eIF2; first identified as a negative regulator of GCN4 expression			1		CCAGTTGTCGTTTGCGCAGGTCAATTCAAACTTACACCCCTCTGGAACCTATATCACGAGCACGCTTCTC
CC_OL_002_E11	CC1G_01154																						CGCTTCTCCCAAGGGACGTGTACAACGCAGGTTCCGGGTTCCAATTATTACCGCACCAAATATACGATCA
CC_OL_002_E12	CC1G_01159																				0		TTGATGCGTCTCATTCCTGTGCCATTGGCTTTCTGGCGTTCCCCCGACGTTGCTCGCGAATATGCGAGAA
CC_OL_002_E13	CC1G_01161												+		+						0		ATGTAGAACATAAGCTCCATCTGTACTCTGCAGCTATGATCCCGTCATGGGTAGACCTCACCCTGGGTGT
CC_OL_002_E14	CC1G_01164															YBR065C	ECM2	Pre-mRNA splicing factor, facilitates the cooperative formation of U2/U6 helix II in association with stem II in the spliceosome, function may be regulated by Slu7p			5		AATTGTACACGTTGCAAAGTCTCGATGTGCGTTTGCAAACTTCAGGGATAGGGAAAGCGCGGAGCTGGCT
CC_OL_002_E15	CC1G_13875																				0		CCCTAAAGAATGGAGCAAATGGATCAAGGAAGCCGATGTCATCCCTGAAAGACTACATTGGAATGGGTCC
CC_OL_002_E16	CC1G_01173															YLR293C	GSP1	Ran GTPase, GTP binding protein (mammalian Ranp homolog) involved in the maintenance of nuclear organization, RNA processing and transport; regulated by Prp20p, Rna1p, Yrb1p, Yrb2p, Yrp4p, Yrb30p, Cse1p and Kap95p; yeast Gsp2p homolog			4		TCTGCTTCAATGTCTGGGATACGGCTGGTCAGGAGAAGTTTGGTGGTCTCCGAGATGGTTACTACATCCA
CC_OL_002_E17	CC1G_01175															YLR344W	RPL26A	Protein component of the large (60S) ribosomal subunit, nearly identical to Rpl26Bp and has similarity to E. coli L24 and rat L26 ribosomal proteins; binds to 5.8S rRNA			4		ACAAGTCGAACGGCGCAAGCGCCCCCATCGGCATCCACCCCTCTAACGTCGTTATCACTACCATCAAGCT
CC_OL_002_E18	CC1G_01178															YNL081C	SWS2	Putative mitochondrial ribosomal protein of the small subunit, has similarity to E. coli S13 ribosomal protein; participates in controlling sporulation efficiency			4		TGCACTTACCAGTCAGAGGACAGAATACACAGTCCAACGCCGCGACGGCCAAGAAGCTCAACAGGCTCGA
CC_OL_002_E19	CC1G_01179															YKR068C	BET3	Hydrophilic protein that acts in conjunction with SNARE proteins in targeting and fusion of ER to Golgi transport vesicles; component of the TRAPP (transport protein particle) complex			3		GGGTCATCCGAGGGGCTCTCGAGATGGTACAACTACAAGTTCAAGCAGAGTTTATTTCCGATGTGCTGAG
CC_OL_002_E20	CC1G_01180															YCR047C	BUD23	Protein involved in bud-site selection; diploid mutants display a random budding pattern instead of the wild-type bipolar pattern			4		AGGGGACCTGTTTTTACAGGATATTGGACAAGGATTTGGGTTCAGACCGGGTAGTTTTGACGGTGCAATC
CC_OL_002_E21	CC1G_01182																				3		AAACCCATGCTCCTGAAATTAGTGATGTCCCGAAACAAGGGGCACAACCAGACCCAAGGCAATCGAATCG
CC_OL_002_E22	CC1G_01187															YLR088W	GAA1	Subunit of the GPI (glycosylphosphatidylinositol):protein transamidase complex, removes the GPI-anchoring signal and attaches GPI to proteins in the ER			0		TACGCTTGCCATTCCTTTTCCCATTTAGGCGTTTTCCATGAGGGAGTTAACGGTCGACTACCCAACCAGG
CC_OL_002_E23	CC1G_13882																				3		ACTCAACTATATCTGCATCACGCATACCCTATCGAACACGCCTGGTGTCAAGCTGTTGGAAGCGGAAGTC
CC_OL_002_E24	CC1G_01196	+																			0		TTCAGTTCCTTCCGAAATCCCTGCTTACCTGCACGAAAGTGGGGCACATAAAGCTATGGGTGCGACCATT
CC_OL_002_F01	CC1G_01197																				4		ACATAACAGAGGGTGGAACTGGTACATCCCCATAGGCCGAACGCTCACTCTGCAAGAGGAGAAGAACGAT
CC_OL_002_F02	CC1G_01199															YLR262C	YPT6	GTPase, Ras-like GTP binding protein involved in the secretory pathway, required for fusion of endosome-derived vesicles with the late Golgi, maturation of the vacuolar carboxypeptidase Y; has similarity to the human GTPase, Rab6					TTCGACATCACTAACCGCCAGTCATTCTTGTCAACGACCAAGTGGATAGACGACGTACGGTCGGAACGAG
CC_OL_002_F03	CC1G_01201																				0		CGCACCCAAAAGACTTATTATATCACCGCCGGTGTCAAGAGTGGTGCATCTCCTTCGCGGGTCTATATGT
CC_OL_002_F04	CC1G_01202		+																		0		CCCGCTTAGAGGGAAAGCTCTCTTACTGCAAACTCTCCAACGTGAAAATGAGGCTCAGTGCAGGCAACTA
CC_OL_002_F05	CC1G_13889		+																		5		ACCAAGAGGTCGAAAGTCGAATGGTTGGATTGGACGACTTGAGGAACTTCACTAGCACGACTGCCCATGT
CC_OL_002_F06	CC1G_01210														+	YKL213C	DOA1	WD repeat protein required for ubiquitin-mediated protein degradation, forms complex with Cdc48p, plays a role in controlling cellular ubiquitin concentration; also promotes efficient NHEJ in postdiauxic/stationary phase					TCTTGCGTCTCTCTCACCACTCCTTTGTCGCCCGAGACTCGAAATCAGTACATCACTGCTTTGCTTTCGA
CC_OL_002_F07	CC1G_01212															YOL010W	RCL1	Subunit of U3-containing 90S preribosome processome complex involved in production of 18S rRNA and assembly of small ribosomal subunit; similar to RNA terminal phosphate cyclase-like proteins but RNA cyclase activity not detected			3		CCAATGTCTAGTCTTGCTCTATATGGTTCTCGGTAGTGAAGATGTCGGACGATGCGTAATGGGCGAACCC
CC_OL_002_F08	CC1G_01215																				0		CTAGCGCCAGCCTTATCCGCTATTGCAAGCAGACGAAGGACCATCTTGAAAAGCAGACGATCCGTACGCG
CC_OL_002_F09	CC1G_01219																				0		GTCAACCACTGCAATTCAGGAATGGTATTCGCGATCAACCCGACAGAGGAACGAACCTTTGAGGCCTTTG
CC_OL_002_F10	CC1G_01220															YJR110W	YMR1	Phosphatidylinositol 3-phosphate (PI3P) phosphatase; involved in various protein sorting pathways, including CVT targeting and endosome to vacuole transport; has similarity to the conserved myotubularin dual specificity phosphatase family			0		ATAAATTCCTTGATCGTTGCGGTCACTTATCATCGGAGAAGTTCTTCCTGTCGCCTTCGTCGTCGGCCGA
CC_OL_002_F11	CC1G_01221	+														YLR180W	SAM1	S-adenosylmethionine synthetase, catalyzes transfer of the adenosyl group of ATP to the sulfur atom of methionine; one of two differentially regulated isozymes (Sam1p and Sam2p)					CCACCTTCATTCGTCGCCGTCTGTGCATCTTTATCCGGGCTCACGTTATCCATACCGTATGGATTGTAGA
CC_OL_002_F12	CC1G_01222															YMR300C	ADE4	Phosphoribosylpyrophosphate amidotransferase (PRPPAT; amidophosphoribosyltransferase), catalyzes first step of the 'de novo' purine nucleotide biosynthetic pathway					GTTATTCCTGTCCCTGATACCTCAAGAGTTGCTGCGCTGAACCTGGCCCAGAAGCTTAGACTTCCTTATC
CC_OL_002_F13	CC1G_01224		+																		6		ATATGCAGCAGGAAAGGCCGGAAATTGTGAATGTCCCTGGACAGGTACGGTTCGGGGAAAGGATAAGTCT
CC_OL_002_F14	CC1G_01227																				0		ACTGGCAGGCCCCTGAACTGTGGACGGCGCATCCCAAGTACAACCATAAAGTTGATGTATTTTCTTGTGC
CC_OL_002_F15	CC1G_01229															YMR078C	CTF18	Subunit of a complex with Ctf8p that shares some subunits with Replication Factor C and is required for sister chromatid cohesion; may have overlapping functions with Rad24p in the DNA damage replication checkpoint					AAGCCCTACAAAGTCACCTATCGCTTTGCAGAAGGAAACTCTGCCGCTGTTCGGAGACCGGTAAAAGTTG
CC_OL_002_F16	CC1G_01232															YKL154W	SRP102	Signal recognition particle (SRP) receptor beta subunit; involved in SRP-dependent protein targeting; anchors Srp101p to the ER membrane			5		TGGTCTATGGCCGCACTACTCCGACACATACATCACTTCAACCCAATGCCTCTATTGCCAACATTACGCC
CC_OL_002_F17	CC1G_01234	+													+								AATCCTGGACTTGTCCGTAATTGGATTCGTTTATGTAGGCAGCAGCAGACCCGTAATGTCTGCCATTCGC
CC_OL_002_F18	CC1G_01238	+														YBR202W	MCM7	Component of the hexameric MCM complex, which is important for priming origins of DNA replication in G1 and becomes an active ATP-dependent helicase that promotes DNA melting and elongation when activated by Cdc7p-Dbf4p in S-phase			5		CAACAGATGTTACAGATCGACTTGGAGGACATTTATACACATGAGGGCACGACGGGGGAACTTGTCGCCC
CC_OL_002_F19	CC1G_01240																				0		TGGCCTGACTTGTTCTCATGTCGACACTTGCCTTATCGTCTTCATTTCCGCCAAAGCGAACATCGACACG
CC_OL_002_F20	CC1G_13895																				0		ACGTCATAAGCATATCTTCGTATGAGGATGACGGAGCCAAGCCGTGTCATGTGCCCGGTGACAGTACATA
CC_OL_002_F21	CC1G_13895																				0		AGAACGCCTGTCATGGTGCGTCGTCTTAAGGTCTTACGGGCTCTTGAATGGCTAAAGGTGAACCACTGTG
CC_OL_002_F22	CC1G_13895																				0		TGAGAGCGGTTACCTGCAGCCTTCCGGGGCAGGACAAGGCCTTCTCGCTAAACGCAAAGACGACAAACGA
CC_OL_002_F23	CC1G_04277																				0		CTTCTCTTCCTGATCTACGAATTGGATCGCAAAAACGGTCCAATGCCCTGCTCCGAGTTTCTCGGTTTCC
CC_OL_002_F24	CC1G_04216																				5		ACAGACCGTTCTGTTCGACAAGGTTGAGGGTATGGGCTGGCTCTCTATCTTCCTGAAGACCTATATCCGA
CC_OL_002_G01	CC1G_04187	+													+						3		GAAATCTGGCTGGATCCCTCAGAGCAGGAGTCATCACAATCAAAAGGCACGTTTGTGCTAGCCACTATGC
CC_OL_002_G02	CC1G_04184														+	YGR048W	UFD1	Protein that interacts with Cdc48p and Npl4p, involved in recognition of polyubiquitinated proteins and their presentation to the 26S proteasome for degradation; involved in transporting proteins from the ER to the cytosol			0		AATCTTCCCTTCGGGCAGTTATTCTTTGGGTTCAATGTAGTACCGTATTCGCCACCAGCAGCTGCACCTG
CC_OL_002_G03	CC1G_04188																				0		TCTGTTCCAAGGATGAAGATCACTGCAAGCAAGATGAGCGGTATCGCACGAGCGAGAGGACAACTTTCCA
CC_OL_002_G04	CC1G_04203										+					YER165W	PAB1	Poly(A) binding protein, part of the 3'-end RNA-processing complex, mediates interactions between the 5' cap structure and the 3' mRNA poly(A) tail, involved in control of poly(A) tail length, interacts with translation factor eIF-4G			2		AGGCTACCAAGGCTGTTGCTGAAATGAACAACAAGATGATTGGCACCAAGCCGCTCTACGTCTCACTTGC
CC_OL_002_G05	CC1G_13908														+						0		AACCAGCGCATACCACTTGGCTAATATCATGGACAACCCTGCCCCCATGAAACTTATGAAAGGCACGTCG
CC_OL_002_G06	CC1G_04240	+																			4		GTATGTTTACGAGCAACAACCGCCCGTTAAGCGCCACGTGAAAGCAGCCAAGCAAATGCAATATCAAGAA
CC_OL_002_G07	CC1G_04250												+		+	YPR024W	YME1	Catalytic subunit of the mitochondrial inner membrane i-AAA protease complex, which is responsible for degradation of unfolded or misfolded mitochondrial gene products; mutation causes an elevated rate of mitochondrial turnover					CCGCCGCCCATACACCCTACTTCTTTACTTAGCAATCTACGGCACTTTGTATTGCGCTTGATCGCTCAGA
CC_OL_002_G08	CC1G_04266															YMR210W		Putative acyltransferase with similarity to Eeb1p and Eht1p, has a minor role in medium-chain fatty acid ethyl ester biosynthesis; may be involved in lipid metabolism and detoxification			0		GTTGGCTATGTGAAGAAGGTCGCGACCACATCAGGTGTAAGGAGTTGGAAGAGTGTCATGTCGTGAATGG
CC_OL_002_G09	CC1G_04317															YLR027C	AAT2	Cytosolic aspartate aminotransferase, involved in nitrogen metabolism; localizes to peroxisomes in oleate-grown cells					AAAGCGGTCCGAGGAGAACTATGAACGTCACATCAGCAGGGTCTCGACTTTATGCGGGAAAATGACGTCA
CC_OL_002_G10	CC1G_11940																				1		AAAACAACGAGGACTACTCGAAGATCTTCAGGCCGAACTGGCGACGTGGAAATGGAGGACGCCGGTCCCT
CC_OL_002_G11	CC1G_11925																						CATACCCTTTCGTGGAACGATACACCCTTGCTATTCTGGTGCCTCGTTGATGATACGCTTGGATTTCTGC
CC_OL_002_G12																YLR231C	BNA5	Kynureninase, required for the de novo biosynthesis of NAD from tryptophan via kynurenine; expression regulated by Hst1p			0		TATTTACTGAGAGTGTCTAAGGCCTCGTTCAAGTAGCGAACTGCTGCGTCGCAGTCCGCAATGGTGTTGT
CC_OL_002_G13	CC1G_12961															YMR304W	UBP15	Ubiquitin-specific protease that may play a role in ubiquitin precursor processing			0		CACTATCTACGACCATCAGTTTGCACCAGAGGATGTGCTAGGTTTGGACCATGTGGACAAGTCTGGAAGG
CC_OL_002_G14	CC1G_05192		+		+									+							6		AACCAAAGTCTTTGTCAATAAACATCCTGTCCTCATCCCCGACCTCGTCGCTCTCAACGGAGCTGTGCAT
CC_OL_002_G15	CC1G_05172															YPR036W	VMA13	Subunit H of the eight-subunit V1 peripheral membrane domain of the vacuolar H+-ATPase (V-ATPase), an electrogenic proton pump found throughout the endomembrane system; serves as an activator or a structural stabilizer of the V-ATPase			0		CAGGACCACAGATGAGCTACCAAGTCGGGTTCTGCATATGGCTACTTTCATTCGAGACTAACATCGCCGA
CC_OL_002_G16	CC1G_13949															YMR302C	YME2	Integral inner mitochondrial membrane protein with a role in maintaining mitochondrial nucleoid structure and number; mutants exhibit an increased rate of mitochondrial DNA escape; shows some sequence similarity to exonucleases					AGGGGCTTACACCGCTTTCGGAATGTCTGCTCTTTTACTCAACCTCATCCCTATCGCAGGTTTTGCGTTC
CC_OL_002_G17	CC1G_05091																						TTACAGAGACAAGAACCAGTCTTTGTCAATCAACCCCACCGCGAAGACTTACCGAGAGTGGCTCAAGGAC
CC_OL_002_G18	CC1G_05090																						GAGGATCGTTATGCCACCACAAGCGGCGAGCATTAGGATTTGAATAAATCTCTGTACATACAATCAAAGA
CC_OL_002_G19	CC1G_13946	+													+	YDR292C	SRP101	Signal recognition particle (SRP) receptor - alpha subunit; contain GTPase domains; involved in SRP-dependent protein targeting; interacts with Srp102p			0		GGGTCGTGGAATTGATGGAATGTTGGTGACCAAGTGGGACACTGTCGACGATAAAGTTGGAGCAGCTCTA
CC_OL_002_G20	CC1G_05148																				0		GTTTTGTTATCCTCAATTGGGCTCTCCTACTCGACGCGCTCGGCATCGTGGTTATCGGCACCTTCGTCTG
CC_OL_002_G21	CC1G_05158															YDR291W		Putative DNA helicase			3		GTGAGGGTGATTCTGTTTTGCAAGATCCGTAAGATTTGTGAATTGGCGATGAAGACGTTGAAGGCGGACT
CC_OL_002_G22	CC1G_05173															YNL252C	MRPL17	Mitochondrial ribosomal protein of the large subunit			0		AGGTTCAACATGGAGGATAGGGAGCGGGAGAAGATAGCATTTGGAGAGAGCTTTGTTCCGCCTGAGGATA
CC_OL_002_G23	CC1G_05182																				0		GCGTACCAGGGACCCACTGGGCCTCTCTATCGGTTCTTGAAACAGTTCGGACCTACATTGTTGAAGAAGT
CC_OL_002_G24	CC1G_05205		+													YCR012W	PGK1	3-phosphoglycerate kinase, catalyzes transfer of high-energy phosphoryl groups from the acyl phosphate of 1,3-bisphosphoglycerate to ADP to produce ATP; key enzyme in glycolysis and gluconeogenesis			0		CCAGTCTCGAGTTGTTGGAGGGCAAGACTCTTCCTGGTGTTGCAGAATTAAGCGAGAAGCAGTAGAAAGC
CC_OL_002_H01	CC1G_03925															YHR193C	EGD2	Alpha subunit of the heteromeric nascent polypeptide-associated complex (NAC) involved in protein sorting and translocation, associated with cytoplasmic ribosomes			4		AAAGACATTGAACTTGTCATCCAGCAGGTTGGATGCTCTCGAGCCAAGGCCGTGAGGGTTCTCAAGGAGA
CC_OL_002_H02	CC1G_03918															YER007C							GTTAAAATTAACTTCCTCGTTGGAGCAAGGCCGCCGTGTAACGGTACTTTCATGTACGAATCTGGATTCA
CC_OL_002_H03	CC1G_03906		+		+				+					+									CCGCCTCATATACCTTGCTGAAACGACCTTGGGCTCTGTAGAATATTCTCCTTGTTACCCTGTGCTTCCG
CC_OL_002_H04	CC1G_03881	+													+	YNL244C	SUI1	Translation initiation factor eIF1; component of a complex involved in recognition of the initiator codon; modulates translation accuracy at the initiation phase					TCCGTATCCAACAACGAAATGGAAGGAAGACCTTGACCACCCTTCAGGGCTTGCCCAAACAATATGATCC
CC_OL_002_H05	CC1G_03860																				0		TAACTCATCGCGCTTGCTAACCGGCGGACAAGAGAAGAAAGTACGGATATTCGACCTGGGACGACCTGAT
CC_OL_002_H06	CC1G_03857		+										+			YPR074C	TKL1	Transketolase, similar to Tkl2p; catalyzes conversion of xylulose-5-phosphate and ribose-5-phosphate to sedoheptulose-7-phosphate and glyceraldehyde-3-phosphate in the pentose phosphate pathway; needed for synthesis of aromatic amino acids			6		GAGCGATTCGGCATCACTGGTTCCAATATTGCCGAGGTTGGCAAGAAGGTTGTTGACTTCTACAAGCAGC
CC_OL_002_H07	CC1G_03829												+		+	YJL203W	PRP21	Subunit of the SF3a splicing factor complex, required for spliceosome assembly			4		TGCGTGATCGGATTCTTCTGCACACAGGTAGTTCGATCTCAATGTCTCGGTTCCGACTTACCTATGAGGG
CC_OL_002_H08	CC1G_03786															YLR351C	NIT3	Nit protein, one of two proteins in S. cerevisiae with similarity to the Nit domain of NitFhit from fly and worm and to the mouse and human Nit protein which interacts with the Fhit tumor suppressor; nitrilase superfamily member					CCATGACGAACCCCGGGTACAGTGTGCCAACCAGTGATCTTCTCTTAGATAGAGTGGTCGCATTCTTCTT
CC_OL_002_H09	CC1G_03794																				0		TCAACGGCGTCACCGTCCAGGACGGCGTCGTCTCCACTGAGGGTGCCAACGTCATCACCCCCTACGCTGG
CC_OL_002_H10	CC1G_03824																						AGGCGCTGAAGGACGGGAAGAATTCAGAGAAGGCTGACCCACTTTATGTCAAAGGTTACATTCGCCAAGC
CC_OL_002_H11	CC1G_03835															YJR074W	MOG1	Conserved nuclear protein that interacts with GTP-Gsp1p, which is a Ran homolog of the Ras GTPase family, and stimulates nucleotide release, involved in nuclear protein import, nucleotide release is inhibited by Yrb1p			0		GTCCCAATACACACCACGGACGATTCAGGAGAAGTTGCGCCTTCCCATGTTGCAAAGTACACCGAAGATT
CC_OL_002_H12	CC1G_03850		+													YPL091W	GLR1	Cytosolic and mitochondrial glutathione oxidoreductase, converts oxidized glutathione to reduced glutathione					GGTGACGCTCCGATAATGGAGGCCTAAAGTCTGTGGGCAAAACACAAGGACTACTTTCGCTTTGTTCGCT
CC_OL_002_H13	CC1G_03912															YOR126C	IAH1	Isoamyl acetate-hydrolyzing esterase, required in balance with alcohol acetyltransferase to maintain optimal amounts of isoamyl acetate, which is particularly important in sake brewing			0		ACGCAAGGAAGCTCGACGTTCTGAATAGGGGCTTTTCGGGCTACAATACAGATTGGGCACTACCCGTCTT
CC_OL_002_H14	CC1G_03914															YDR212W	TCP1	Alpha subunit of chaperonin-containing T-complex, which mediates protein folding in the cytosol; involved in maintenance of actin cytoskeleton; homolog to Drosophila melanogaster and mouse tailless complex polypeptide			4		GGATTGACGATGCGATTCAATGTGTGCCTGACCAACCTGCAGAAGACCCCCACGCACATTAAATGTAGAG
CC_OL_002_H15	CC1G_03921		+													YMR152W	YIM1	Protein of unknown function; null mutant displays sensitivity to DNA damaging agents; the authentic, non-tagged protein is detected in highly purified mitochondria in high-throughput studies					GGAAGAGCTACAGGGAAGGTCGTAGTGAAAGTCGATAATAGCCTTAAAGCATGATGAATGGCGTGTCCAC
CC_OL_002_H16	CC1G_03923															YGL047W	ALG13	Catalytic component of UDP-GlcNAc transferase, required for the second step of dolichyl-linked oligosaccharide synthesis; anchored to the ER membrane via interaction with Alg14p; similar to bacterial and human glycosyltransferases					CAATCTTATCAAAAATTCAATGGGGCCAAAAGTCGTCGAACCCGTCGACGTCGCAACAGACAATCCAGCA
CC_OL_002_H17	CC1G_03927															YMR186W	HSC82	Cytoplasmic chaperone of the Hsp90 family, redundant in function and nearly identical with Hsp82p, and together they are essential; expressed constitutively at 10-fold higher basal levels than HSP82 and induced 2-3 fold by heat shock					GAGGCTGCCTCCACCTCTGCTATGGAGGAGATCGACTAAACGCTTCCTTCTCGTTGAAGTTTTTGGGTTT
CC_OL_002_H18	CC1G_10822												+			YER090W	TRP2	Anthranilate synthase, catalyzes the initial step of tryptophan biosynthesis, forms multifunctional hetero-oligomeric anthranilate synthase:indole-3-glycerol phosphate synthase enzyme complex with Trp3p			9		GTTGAAGAAGATGAGTTCATCGAGACTGTCAACAAGTTGGGTGGAAACGTCCGTGCATTGGAAGCGGCAG
CC_OL_002_H19	CC1G_10828																						TGGCCTGGGGGCATATTTGCGGCGGTGTAAAGACGTTATCATTCAGGACGGGCAACTGTCATGCGCTTTG
CC_OL_002_H20	CC1G_10843															YOR281C	PLP2	Essential protein with similarity to phosducins, which are G-protein regulators; interacts with CCT (chaperonin containing TCP-1) complex; lethality of null mutation is complemented by expression of mouse phosducin-like protein MgcPhLP			4		AGGTCATCCCAATAAGCAGAGAGGACTACACTCGTGAAGTCACGGAAGCCAGCGCAGTGGACGCAGAGGA
CC_OL_002_H21	CC1G_01582		+		+		+		+														GCCCGAACCGGACTGCTGAGATTTTGTTTAGGAAGCGTCAGCGGTAGAATAGTAAACCTGCGAAATGGTG
CC_OL_002_H22	CC1G_01568															YOR317W	FAA1	Long chain fatty acyl-CoA synthetase with a preference for C12:0-C16:0 fatty acids; involved in the activation of imported fatty acids; localized to both lipid particles and mitochondrial outer membrane; essential for stationary phase					TTGGGGTATCATGCCTCTCCCATTGTGCGCCCTCGTGTATGAATTGTCCTTGACTATGCCCGTTGCATAA
CC_OL_002_H23	CC1G_15264																				0		CGACATCCCTTCAGTGCTGCGAATATGCAGGAGGACATTAGCCAACGACCCTTTGACGACTTACATATGC
CC_OL_002_H24	CC1G_01604										+				+	YKL081W	TEF4	Translation elongation factor EF-1 gamma			3		AGGATGCTGCTTTGGTTGATCAATGGGTTCACCTGGTCGAGAGTGAGGTCGATGTCTACACTGACTTCGT
CC_OL_002_I01	CC1G_01651															YDR456W	NHX1	Endosomal Na+/H+ exchanger, required for intracellular sequestration of Na+; required for osmotolerance to acute hypertonic shock			5		ATAACAACAATCGCCGTTGTGTTTACTCGGTATGCTGCGGTGTTCCCCCTCTCCGAAGCCATCAACTTTG
CC_OL_002_I02	CC1G_01652						+		+		+		+		+						7		AGCCTGTTCTTGGCTGGACCACTCACCACAGTATCGTCGAGCATGAAGGAAAGTGGTACTTGTTCTACCA
CC_OL_002_I03	CC1G_09429															YER025W	GCD11	Gamma subunit of the translation initiation factor eIF2, involved in the identification of the start codon; binds GTP when forming the ternary complex with GTP and tRNAi-Met					TACGCTAACGCCAAAATCTACAAGTGCGAAAATGATGCTTGCCCAAGACCAGGCTGCTACCGTTCCTACC
CC_OL_002_I04	CC1G_08759																						GTACCCTTTACCCTCGCGTGTGGATTGTAGTTGGTCACAGCTTGTCTACACTTTAATAGAATGTTCACTC
CC_OL_002_I05	CC1G_08739		+																				TTTTTATCACGTCCGCCATAGATATTCGGGTACAAGGCACGTTACAGGGGCTTCGAGCCCATAGAGCTGT
CC_OL_002_I06	CC1G_08745						+		+														TGTTGCTTTATTGGTCGCATTCGTTATAATGTCACACTGCGTTCACTCGTTCCTTTTACTGATGCCGTCG
CC_OL_002_I07	CC1G_09115																						TCACTCAGCTTGGCCTCTACGATATCGTCAACACACCAGGCGTTGCTGCCGATCTTTCTCATATATCGAC
CC_OL_002_I08	CC1G_09724																						CCAACTTAGACTAGTGGTTGTATGTAGCGGCATTTGCGATGAATGATACAAGGAATATGCGGTTCCCACG
CC_OL_002_I09	CC1G_09717															YML056C	IMD4	Inosine monophosphate dehydrogenase, catalyzes the first step of GMP biosynthesis, member of a four-gene family in S. cerevisiae, constitutively expressed					GTACACGGATTGAACTCCTACACCAAGCGACTCTTCTCTACCTAAGCTTCCCTCCTCTCACCATCTCATG
CC_OL_002_I10	CC1G_09700				+		+		+														CGCTTTGTGAACCATTCGAGCTCGTTTGAACGTGTTGCAACCTTGTACGACTGTCTTGCCAATCCCGTGT
CC_OL_002_I11	CC1G_09705																						GCCTATGAGGAGGGTTAGTAAAGCTGGGTTGGAGAGTTTTGTGGTCAATTCGTAGCCATGATCTCTCCCC
CC_OL_002_I12	CC1G_09714															YJR047C	ANB1	Translation initiation factor eIF-5A, promotes formation of the first peptide bond; similar to and functionally redundant with Hyp2p; undergoes an essential hypusination modification; expressed under anaerobic conditions					CGACGGGGTTCAATTTTCACGACTACGATGCTGATTGTCTAGCCTCGCCCACGCATACACATATCATTCC
CC_OL_002_I13	CC1G_11882	+													+	YPR052C	NHP6A	High-mobility group non-histone chromatin protein, functionally redundant with Nhp6Bp; homologous to mammalian high mobility group proteins 1 and 2; acts to recruit transcription factor Rcs1p to certain promoters					CCGGCGCGCTGCTGCTGTTACGATTTACCGGTTGTTCAAGCCCCCTTAATATTACCATGCCATGTTGTAA
CC_OL_002_I14	CC1G_11883															YPL145C	KES1	Member of the oxysterol binding protein family, which includes seven yeast homologs; involved in negative regulation of Sec14p-dependent Golgi complex secretory functions, peripheral membrane protein that localizes to the Golgi complex			0		CGCTCACTGACTCATACCCTCACTGCAGATGAACGCCTCGGCAAGTTTGCAAAGATTAATCCTCCTACTG
CC_OL_002_I15	CC1G_11191																				0		GACCCAAGTTGGGTCCTACCTTTTCCTCATCGCAGGACACAATGGCCAAGAATACTGCTCCGAAATTCTG
CC_OL_002_I16	CC1G_11194		+		+									+									TCGTTTTCAACAGTAACTCCATACAAAACATTACCCTAAAGCTACCCACAGGTCTCGCTAATCAACGTCA
CC_OL_002_I17	CC1G_02239		+		+		+		+					+							0		TGACCAACCGGTGGTTACTTTTGAACTTTGATGCCCTGGGAGCGTTGGCGGTGCTTGTTACTAGCTTGTT
CC_OL_002_I18	CC1G_02170																						CCTCTCCCTCCGCCCGTTCTGCGATGACGATAACTAAAGTAAAACTACAAAGCCAGGTCTGTTGGTACAC
CC_OL_002_I19	CC1G_02094																				0		AAAATCCATTATTTCTCCCAACGAGCCTCTCACTCCGGGCCTCCTATACGTTGGTGTTTCAACCCTCACC
CC_OL_002_I20	CC1G_02125																				0		CGCCAAGAAACAGGTCCCTGTACTGGAATGGGAGCATCTGAATCGACTGGAGTTATTCGTCAGGCTACTT
CC_OL_002_I21	CC1G_02203	+						+		+		+				YBR265W	TSC10	3-ketosphinganine reductase, catalyzes the second step in phytosphingosine synthesis, essential for growth in the absence of exogenous dihydrosphingosine or phytosphingosine, member of short chain dehydrogenase/reductase protein family					GAAGCACGCTCTGCGAGCCCTCGGCGACACACTCCAATCAGAACTCATGCTCTACGGTATCGACGTCCAG
CC_OL_002_I22	CC1G_02204		+													YPR160W	GPH1	Non-essential glycogen phosphorylase required for the mobilization of glycogen, activity is regulated by cyclic AMP-mediated phosphorylation, expression is regulated by stress-response elements and by the HOG MAP kinase pathway					CGCCTGTGATAGGGGTAAGATGGACGTTTGCTGGATCTTGGCTTAGACTCTCCTCTTTCGTTTCATTCCC
CC_OL_002_I23	CC1G_12687				+		+		+														GTTGGGGAGGTGACTTTCCTTTCGAGAGAGCGCTGGCGAGCCTTCAGTGTTGGAAGTTTTGATTATAACC
CC_OL_002_I24	CC1G_05826															YER073W	ALD5	Mitochondrial aldehyde dehydrogenase, involved in regulation or biosynthesis of electron transport chain components and acetate formation; activated by K+; utilizes NADP+ as the preferred coenzyme; constitutively expressed					AACGTCATCTTCAACGATGCTGATATCGACCAGGCTGTAAACTGGGCTGTTCACGGACTCTTCTGGAACC
CC_OL_002_J01	CC1G_05800												+			YBR058C	UBP14	Ubiquitin-specific protease that specifically disassembles unanchored ubiquitin chains; involved in fructose-1,6-bisphosphatase (Fbp1p) degradation; similar to human isopeptidase T					TCGGGGAGCAGAGTGGTATGGTACACGGGAGGCATATGAAGACACGATTCGGATGAATCCACAAAGTTTG
CC_OL_002_J02	CC1G_05798		+																				CCTTCCTCGATGATATCGCTGTTTGGCAACTCTGATGGACTGCCTACTATGCTTGTGTAGAGTCCCTGTG
CC_OL_002_J03	CC1G_05812		+		+				+				+								6		GGAGTGACGACCCGCTATACCGCAGCATGAATAGAAAGCTTCTCGCCTTGCAGATCAAGTATGAGATTCC
CC_OL_002_J04	CC1G_05816	+																			1		CTATGGGATTCAGTCTGGGCAAACAATCGACATGGTAGACGGGTCAATGAAAGTAGGCAAGCCCGTGATC
CC_OL_002_J05	CC1G_12305												+										GCTCATCCGCTTCCAGTGTTCTCGCCGAGCATTCGGACAGGGTTTGCTTACTAGACGTTGTACAATATGT
CC_OL_002_J06	CC1G_15400																				0		CCGTTTGGGATCTCGGCTTGTAGAATGGGTTTAGAGTGCCTTGGGGCCCGTTGGATTGTTTGCAATACAA
CC_OL_002_J07	CC1G_09809												+			YDR127W	ARO1	Pentafunctional arom protein, catalyzes steps 2 through 6 in the biosynthesis of chorismate, which is a precursor to aromatic amino acids					CCGAAGGAGCAGGTTTCTACGCGCGTTTGGGAGAAGTATGGCGAGGTTTAGGTGTTTGATTTGATTGAGC
CC_OL_002_J08	CC1G_09813																				8		ACCCACATTCATACCAAAGTCTTCCCAGAATGGGTCCCGCTTCCGAATGGCACGTTCAAAGCAGGACGAT
CC_OL_002_J09	CC1G_11478															YBR121C	GRS1	Cytoplasmic and mitochondrial glycyl-tRNA synthase that ligates glycine to the cognate anticodon bearing tRNA; transcription termination factor that may interact with the 3'-end of pre-mRNA to promote 3'-end formation			0		TCTTACGATCGACTTTGCTTCCGTCCAAAACCGCACCGTCACCATTCGTGAACGAGATACCATGGACCAA
CC_OL_002_J10	CC1G_09926															YGR088W	CTT1	Cytosolic catalase T, has a role in protection from oxidative damage by hydrogen peroxide					CGCCAAGGCTTGAAGAGCAAGCACTCAAGAGTCACACTCAAGTTTACGATACCCCAATACGATAGGGCCT
CC_OL_002_J11	CC1G_09911												+		+								CTTCTTCTCCGCTATGCAACTTTATGACATGTACCCACCACACACATATGATGGTTATGCGACTTCCTGG
CC_OL_002_J12	CC1G_09920												+								0		ATCCATCTAAACGCCGACTTCACGACTACCCGTCCCCCAATGCACCCGTTCACAGGCTCGCCCTCGACTT
CC_OL_002_J13	CC1G_06499																						GTACGCTGCCAGTTGTACCTTACTATATATCACCTTGGGAGGAGCCTAGGAGCTCTTCTTTGCCGTTACG
CC_OL_002_J14	CC1G_06462															YDR390C	UBA2	Nuclear protein that acts as a heterodimer with Aos1p to activate Smt3p (SUMO) before its conjugation to proteins (sumoylation), which may play a role in protein targeting; essential for viability					CTGGGCTTTGGTCGGATCCTGTCTGATACCGTCGACGCAACTGAACATTATGCTTCGCCTTACTTTTCGT
CC_OL_002_J15	CC1G_06452											+		+							7		TCAATCCCATACATGTACTCGAGTGTGCCAATTCGTTTCTCCAGCGGGCTAAACGGTGCCGTAGATATCC
CC_OL_002_J16	CC1G_06503																				0		CGACAATACCTACAAGACTGAGGGCGGTCCTGGACTGCGATATGGAGGCAAAGAGGAGTGGGCGAAGGAG
CC_OL_002_J17	CC1G_06528																				0		ATCTCGTAGCTGAGCCACTTGTCGCTCGAGAGCCCATCTTTGGTTTCATCAAGAGGATTTTCACCGGGAA
CC_OL_002_J18																							GCCACTCGGGTCTGTGCTCACGGTTTGGTCTCATAGTTCGGCTTCACGTTTATAACAAGTACGTGTTCTA
CC_OL_002_J19	CC1G_07287															YDR050C	TPI1	Triose phosphate isomerase, abundant glycolytic enzyme; mRNA half-life is regulated by iron availability; transcription is controlled by activators Reb1p, Gcr1p, and Rap1p through binding sites in the 5' non-coding region			0	tpi	TCAAGGAGTCTGGTGCTTTCACTGGAGAAATCAGCCCTAAGCAGATCTCTGATGCTGGTATTCCCTACGT
CC_OL_002_J20	CC1G_07290																						ACCCTATTTGCTGTGAAGCCGAGTGGAAGGCGGAAGGCGGATGTCTGAAGCTCTTTTTGTATCCTGTTTG
CC_OL_002_J21	CC1G_07292																						AACCCGGAGCAGGAATGGACTGGGACTTGTATGTTTCATACACTCGACTCTGTTACAACGGTCTAGTGCC
CC_OL_002_J22	CC1G_07747		+		+								+			YLR354C	TAL1	Transaldolase, enzyme in the non-oxidative pentose phosphate pathway; converts sedoheptulose 7-phosphate and glyceraldehyde 3-phosphate to erythrose 4-phosphate and fructose 6-phosphate			7		TTGTACGAGTCTGTTGGTATCAGCAAGGACCGTGTCCTCATCAAGATCGCCTCCACCTGGGAGGGTATCC
CC_OL_002_J23	CC1G_07750														+	YLL045C	RPL8B	Ribosomal protein L4 of the large (60S) ribosomal subunit, nearly identical to Rpl8Ap and has similarity to rat L7a ribosomal protein; mutation results in decreased amounts of free 60S subunits			2		GAAGAACCCTCTCTTCGAGGCTTCCCCCAAAAACTTCGGCATCGGCCAGGACATCCAACCCGTCCGTGAC
CC_OL_002_J24	CC1G_11781													+							0		CGTCTGGACTTTGACATGGACCTCTGCTGGATACAACATTCAAGATGGCAAGAGGACCGTCTCTTGGAGT
CC_OL_002_K01	CC1G_05447																						GATTGGGAGCAGGGTGTTAGGGATTTGGCGTGAGGGAGGCTACTGTGGGGTAGTCCACGAGGGAGGTTTT
CC_OL_002_K02	CC1G_05380		+		+																6		CGTGGTCGCATGGCCTGTCAGACAATCTATTCAGATGTACGCTTTACGAGGGCTCAATCCGATCTGTGAA
CC_OL_002_K03	CC1G_05387															YIL155C	GUT2	Mitochondrial glycerol-3-phosphate dehydrogenase; expression is repressed by both glucose and cAMP and derepressed by non-fermentable carbon sources in a Snf1p, Rsf1p, Hap2/3/4/5 complex dependent manner			0		TCACGGAGAGGGTGAGGCTTGTTGGGAGTGATGCGTGGAGTCGGAATATGTTTATTGGGTTGATTCAGAC
CC_OL_002_K04	CC1G_14943		+																				CAAGAATATTACGCGAGTGGAGAATGAGGATTGGTTTGTTAATGTGTGGCCTGGGTCTCCTCAAGAACAA
CC_OL_002_K05	CC1G_14953																				0		TGGAGCTCATCTCGCCGTTTACGTTCATTTACGCATTCCTCATCTCGCCGCTCACTTTCTACACACCCGA
CC_OL_002_K06	CC1G_08043																						CGTGTACGATGGAAGCTTTAGAAGCGATTGCCGCCACGAGGGACGATGTGATAGAGCGATTGTATTCGTA
CC_OL_002_K07	CC1G_08054																						TTATCCAGCAACTACCGAACGCGGACAAACTCAAGAACTACGTCTGGCAGATCTTTATCGAGGGAGGTCC
CC_OL_002_K08	CC1G_13075																						CGAGTTTGTGAGGGCATGGTTGAAGGATTGGAAGGCACCTAGTGTGACTGACGGCTCCTCGGATTAAATT
CC_OL_002_K09	CC1G_03467																				1		CATCTGGTGGAAGTTGAACAATGCCGAGACCAAAATCCGACCTGCCCATGTGATGGACGTTGCACAAGCT
CC_OL_002_K10	CC1G_03449																					fatty acid desaturase	ACATCTGCCAGCGACTCTGGTATTGAAGTAGAAAAGTAGAGGCTTCCGCCTACATTCCCCACCTACACAG
CC_OL_002_K11	CC1G_03403																				3		TACCGCTTTCATCCTTTATTTCGACACCTACTTCACTACATCGGGTAACCCGGTCCCACCTGAGACCCAA
CC_OL_002_K12	CC1G_03355															YBR179C	FZO1	Mitofusin, mitochondrial integral membrane protein involved in mitochondrial fusion and mitochondrial genome maintenance; contains N-terminal GTPase domain; targeted for destruction by cytosolic components of the ubiquitin-proteasome system					AAACACAGGAGAAATTGGGAAAGAATGAGAAAGCGCATGGGGACTCGTCCAAAGTGACGTCCGCTTGGTG
CC_OL_002_K13	CC1G_03387																				0		GGCGATCCGTGAAAGTGGATTGGAGAGGTCGCAGCTTTATGTGACGACCAAGTATAGCTATGGCCATGTT
CC_OL_002_K14	CC1G_03406																				3		GGTTAATCGACAAGGAGAAATATGTCATCCCTCCTCACCTGCACGACCTCCAAGAATCCGACCTTCCTGA
CC_OL_002_K15	CC1G_03416															YJL011C	RPC17	RNA polymerase III subunit C17; physically interacts with C31, C11, and TFIIIB70; may be involved in the recruitment of pol III by the preinitiation complex					CATCTATACCAGGCAACATCGGCTCCGTCCTCGAAACGAGTGAAAATCTAAGGACAATTGAAGTCGAGGC
CC_OL_002_K16	CC1G_03436																						AGAACTTCCATATTACTCGTCTTCCACAGGCAGAATTCGACCTCCTAGAAGCAGCCTCGCGAGCTCACAA
CC_OL_002_K17	CC1G_03459														+						4		ATTATTCAATAACCACCCTGAGCTCATCCCCACATTGTTCCCTCACCTACCATCGGATCTACCCGTCCCA
CC_OL_002_K18	CC1G_07194																				0		GTCTTAGGCGATGCGAAGAATTTGAAAAGACTGGCCAAGGATACATGTGGGAGCAGACAACGCAACCCCA
CC_OL_002_K19	CC1G_07181																				3		TACCAAGAACAAGAGGTGGTCTATTCGATGAATGCAGGAGGCCGCGAACTAGAAGTCGTGGAGGCAAAGT
CC_OL_002_K20	CC1G_07176															YOR117W	RPT5	One of six ATPases of the 19S regulatory particle of the 26S proteasome involved in the degradation of ubiquitinated substrates; recruited to the GAL1-10 promoter region upon induction of transcription			0		CGGAGAAGTATACCGACATTGGTGGTTTGGAAAAGCAGATTGAGGAACTAGTCGAGGCTATCGTCCTGCC
CC_OL_002_K21	CC1G_07172		+		+																		GTCCAAGGGTAGACAGCAATTTCTGACACAGCGAGACTGTGACCTAATAGACTTTATGCAATGCGATATT
CC_OL_002_K22	CC1G_07167															YJR104C	SOD1	Cytosolic superoxide dismutase; some mutations are analogous to those that cause ALS (amyotrophic lateral sclerosis) in humans			0		GTTGGCAAGTATCTACCTCTCTTCGCGCATTCTCCTGGCTAACAATCCCCTTCAGCTATCGTCGAGTAAG
CC_OL_002_K23	CC1G_14988												+		+	YJL177W	RPL17B	Protein component of the large (60S) ribosomal subunit, nearly identical to Rpl17Ap and has similarity to E. coli L22 and rat L17 ribosomal proteins			4		AGAAGTCCATCAAATTCATTACCCGTCTGCTCAAGAACGCCGAGTCCAACGCGGACGCTAAGAACATCGA
CC_OL_002_K24	CC1G_07131															YGR231C	PHB2	Subunit of the prohibitin complex (Phb1p-Phb2p), a 1.2 MDa ring-shaped inner mitochondrial membrane chaperone that stabilizes newly synthesized proteins; determinant of replicative life span; involved in mitochondrial segregation					ATTACCCACGTAGCCTTCTCTCCCGAGTTCACCTCCGCCGTCGAAGCCAAACAGATTGCACAACAAACTG
CC_OL_002_L01	CC1G_07119										+		+										CCCTCCTTTAAAACTGGTCCGCTCTAGATTCTAATTCCATCTGGGGGATTGGTCGTTTGCCGCTCTGTCT
CC_OL_002_L02	CC1G_07123															YKL007W	CAP1	Alpha subunit of the capping protein (CP) heterodimer (Cap1p and Cap2p) which binds to the barbed ends of actin filaments preventing further polymerization; localized predominantly to cortical actin patches			3		CACTGTGGATCTAACCAAGCGGCAGGTCAAGGGCAGCATCCATGTCAACGTACATTACTACGAACAAGGA
CC_OL_002_L03	CC1G_07140																				0		AACATATTTGAGCAACTAGTACCCGCCGATCCATTGCGACTCGACCCCAGGATACACTCTCCATACGAGA
CC_OL_002_L04	CC1G_07164																				0		AATTGAGGCAGCGTGTTGTTCGAATTTACCAGCCAACCCGAAACACTATGCAAAGCGGCTCCGGAAAGAC
CC_OL_002_L05	CC1G_07190												+		+	YBL105C	PKC1	Protein serine/threonine kinase essential for cell wall remodeling during growth; localized to sites of polarized growth and the mother-daughter bud neck; homolog of the alpha, beta, and gamma isoforms of mammalian protein kinase C (PKC)			0		CGAGACCAAGCCGAATTCAACGGTTTCTCTTGGGTTGCGAGTTGGGCGGATATCTAATGAACGAATGGCA
CC_OL_002_L06	CC1G_11697															YCR026C	NPP1	Nucleotide pyrophosphatase/phosphodiesterase family member; mediates extracellular nucleotide phosphate hydrolysis along with Npp2p and Pho5p; activity and expression enhanced during conditions of phosphate starvation					AGTCGCTATCACGCACTCCCTCTCGTTCGCAATGGATTATGGCTCTCACTTCACAGGTGAACCAGGAATT
CC_OL_002_L07	CC1G_11703															YNL055C	POR1	Mitochondrial porin (voltage-dependent anion channel), outer membrane protein required for the maintenance of mitochondrial osmotic stability and mitochondrial membrane permeability; phosphorylated			0		AGCGGTCTCCACACCCGGGCTGTCCTTGACCTCTTCAAGGGCCCTACCTTCACCACCGATGCCGTTGTCG
CC_OL_002_L08	CC1G_03025														+	YKL209C	STE6	Plasma membrane ATP-binding cassette (ABC) transporter required for the export of a-factor, catalyzes ATP hydrolysis coupled to a-factor transport; contains 12 transmembrane domains and two ATP binding domains; expressed only in MATa cells			0		CTTGACCAAGCTTCTCGTGGACGAACGACGATTGCTATTGCCCATAGATTATCCACCATCCAAAACGCCG
CC_OL_002_L09	CC1G_02972											+				YNL321W	VNX1	Low affinity vacuolar membrane localized monovalent cation/H+ antiporter; member of the calcium exchanger (CAX) family; potential Cdc28p substrate					GCTTCTCCTCGTTGATTACCACGTACTTGCTTTTCCGCCTTCCTGTTGCATTCACAGACGAGTTCTCTCG
CC_OL_002_L10	CC1G_15016																				6		CGTGGAGTGTACATTCTTCTCTTCGGGCCCCACCACCACCTTCGTACTTCATCCAAGACTGCATTTTTAG
CC_OL_002_L11	CC1G_02958																				0		GTTCTACACCACGACTTCGAAACAGATTCATGATATCCAAGAAGAAGCCCGCCGTATCGCTACCGAGGAG
CC_OL_002_L12	CC1G_02956															YEL004W	YEA4	Uridine diphosphate-N-acetylglucosamine (UDP-GlcNAc) transporter required for cell wall chitin synthesis; localized to the ER			0		ATGCTGGTTGCCTCTCTCGTTTGCACGGCTACTCTCGGGGTCCTTCAGGAGCTTACATATAAGAAGTATG
CC_OL_002_L13	CC1G_02901															YER055C	HIS1	ATP phosphoribosyltransferase, a hexameric enzyme, catalyzes the first step in histidine biosynthesis; mutations cause histidine auxotrophy and sensitivity to Cu, Co, and Ni salts; transcription is regulated by general amino acid control			0		ACGTAGTGATGCACTACAACATTTCCAGGGATAAACTGGAAGGAGCCACCGCGGTCACACCAGGGAGAAA
CC_OL_002_L14	CC1G_02902	+																			0		CGAGGGAACTGGCCACCATAGGATTGTATCTTATGACCTGAATGGCCTGAAGATGGTCGTTCGCTTTGAA
CC_OL_002_L15	CC1G_02993																						GGAAGCGATAGGAGCAGTTCTGACTGGTATGGTGTTGGCATCGCACGGTGATAAATCGTTTCGTTTGCAG
CC_OL_002_L16	CC1G_15026																						TTTGATTTCTCAGGGGCTACACTACCAAAGAGGATATGTCTGGAGGGCCAGGAACGCGGGCCACAATTTT
CC_OL_002_L17	CC1G_12319												+										AAGCAAACAATATCCACTTGATAGGGGAGTTCCTTGCACATCCCTTCCCAAAGACTCGGTACGAGACCGC
CC_OL_002_L18	CC1G_12324															YBL056W	PTC3	Type 2C protein phosphatase; dephosphorylates Hog1p (see also Ptc2p) to limit maximal kinase activity induced by osmotic stress; dephosphorylates T169 phosphorylated Cdc28p (see also Ptc2p); role in DNA checkpoint inactivation					CCGGAACCTGTGTCCAATGTCGAGGGATTATTGGACAAGAGTGAGGAACCTTTGAAAGGATAGCCCTCTC
CC_OL_002_L19	CC1G_04997												+			YIL099W	SGA1	Intracellular sporulation-specific glucoamylase involved in glycogen degradation; induced during starvation of a/a diploids late in sporulation, but dispensable for sporulation					CTGGGTCCAAGACGATTGATGATTCGTGGAGGTAGAAATGGGACTCCATGGCTGTATTCTGTCCTCTCTC
CC_OL_002_L20	CC1G_05055		+		+											YDL215C	GDH2	NAD(+)-dependent glutamate dehydrogenase, degrades glutamate to ammonia and alpha-ketoglutarate; expression sensitive to nitrogen catabolite repression and intracellular ammonia levels					GCTCGCGGTCTCGCCCAGTCTGACTAGATGTCCTCATCAACACGCTGGATCCTCCAAAAGTTTAGTTAAA
CC_OL_002_L21	CC1G_12439															YIL125W	KGD1	Component of the mitochondrial alpha-ketoglutarate dehydrogenase complex, which catalyzes a key step in the tricarboxylic acid (TCA) cycle, the oxidative decarboxylation of alpha-ketoglutarate to form succinyl-CoA			0		AAACGAATTTCCAGAGGTATATCCCTGAGCCGTTTGAGGAAGGCTTGGTTGCGCCTGAGGAGATCAAGAG
CC_OL_002_L22	CC1G_10946												+								0		ACGGTTCCACCTACTACAACAGCGGAACTGGATACTCCCAGTATACCTCGCCCAGCGGTCAGACTTACAA
CC_OL_002_L23	CC1G_10919	+														YPR163C	TIF3	Translation initiation factor eIF-4B, has RNA annealing activity; contains an RNA recognition motif and binds to single-stranded RNA					GGGGCGAAACTGTTGACCAGTCGAAGGCACCGGAAGCGAGTTCTTAGTCTAGTTTAATCTGACATATGGC
CC_OL_002_L24	CC1G_10936												+								0		CGAAATAGAGCTCTCCACCGGAACGTCCAAACCATCCACGACTCTACCACTCTCAGTTGACTACTCAATC
CC_OL_002_M01	CC1G_10938		+																				CTTGTTTCTTAACCGGCCCCCGGATTTCACAGTTTACCCTGGTCCTTGGTCATCCTATCCTTTCGGTATC
CC_OL_002_M02	CC1G_06329																				9		CCGAAGTAAATTCGATATTCCATCGTTCTTGAAAATGAAACCCGTGCTTGATACCCATGTCAACATGGAG
CC_OL_002_M03	CC1G_06270															YDR105C	TMS1	Vacuolar membrane protein of unknown function that is conserved in mammals; predicted to contain eleven transmembrane helices; interacts with Pdr5p, a protein involved in multidrug resistance			0		TAGAGAACTGGGAATACTCCTCGTCCAACCTCTGGCAGTGGATTTTGATTGGGTCAACAGCTGCCATGTA
CC_OL_002_M04																					7		AATTGTGAGAGGTCACAGCGGTTCTCGTCTTCGATCAGGTCCACAAGGGTCTGGTAGTATTTGTGCTGGA
CC_OL_002_M05	CC1G_06295														+								GTGTACTTTTATCCTTATCTCCTGTTGGGCGCGAATGTGGGCTCATTGTAACTAGGGCTGGCGCATCTTC
CC_OL_002_M06	CC1G_14403															YCR098C	GIT1	Plasma membrane permease, mediates uptake of glycerophosphoinositol and glycerophosphocholine as sources of the nutrients inositol and phosphate; expression and transport rate are regulated by phosphate and inositol availability			0		GAGGCCAATGGATACGATACGTCTGCGATGGGTCTTCCTGATTTTGACTCGGAGAGAGGATCATTAGGTG
CC_OL_002_M07	CC1G_14405															YLR196W	PWP1	Protein with WD-40 repeats involved in rRNA processing; associates with trans-acting ribosome biogenesis factors; similar to beta-transducin superfamily					GTCTGTCGTTCCGTTCCTCGTCCCGGTGTCTGTGGTACATCCCTTAACTTAGCTACAAACCGCTTTATTC
CC_OL_002_M08	CC1G_06344																				3		TTCCTCTTTGCCGTAACTGCCTTCATTGGCGCAGGATTCACCATAAAATACTATTTGACCCCCGACGCAC
CC_OL_002_M09	CC1G_06396															YKR009C	FOX2	Multifunctional enzyme of the peroxisomal fatty acid beta-oxidation pathway; has 3-hydroxyacyl-CoA dehydrogenase and enoyl-CoA hydratase activities			8		GGAAGGAGATTACCACCTATGACGAGCGTGCAACACACCCTGCCAACTCTGGAGAATCTATCCAACAGAT
CC_OL_002_M10	CC1G_14414		+		+								+			YBR133C	HSL7	Protein arginine N-methyltransferase that exhibits septin and Hsl1p-dependent bud neck localization and periodic Hsl1p-dependent phosphorylation; required along with Hsl1p for bud neck recruitment, phosphorylation, and degradation of Swe1p			7		TCGTAGCTGGCCAAGTTTCAGCCAGCCCGGTGCGTTGCGGTCCCAATAAATTCGTGTAGTTTGAAGTTTA
CC_OL_002_M11	CC1G_06410																				0		ATGAGCTGAAGGAGGGCAGGGATAAGTTTGAGTCTGAGGCTGATAGGTTGAAGAGAGAGGGGGCAAGCAA
CC_OL_002_M12	CC1G_06423												+		+	YJR065C	ARP3	Essential component of the Arp2/3 complex, which is a highly conserved actin nucleation center required for the motility and integrity of actin patches; involved in endocytosis and membrane growth and polarity					CGTTACCGGTCGGAAATACGGTGTAGATGTTGGCTACGAACGATTCCTTGCCCCGGAAATCTTCTTCAAC
CC_OL_002_M13	CC1G_12418															YGL187C	COX4	Subunit IV of cytochrome c oxidase, which is the terminal member of the mitochondrial inner membrane electron transport chain; N-terminal 25 residues of precursor are cleaved during mitochondrial import; phosphorylated			0		ACCCCATCAAGGTCCTTTCCTATGATGTCGAGCGCATGATTGGCTGCACTGGCTCCCCTGCCGACTCTCA
CC_OL_002_M14	CC1G_12570																				0		TACCACCTGAACAGCGAGAAGCCCTCGAACCATCCATCTTCAACTCGCGTACTCCTTTCATTCTCAACAC
CC_OL_002_M15	CC1G_12569	+									+				+	YER107C	GLE2	Component of the nuclear pore complex required for polyadenylated RNA export but not for protein import, homologous to S. pombe Rae1p			0		CCGATTCAATTTCTTCAGTCTCGTTCTCACCACAAGCCGACTATCTTGCAGTTGGAAGCTGGGACAATAG
CC_OL_002_M16	CC1G_07085																						GGACGCCTAACACCTGTATTTTTGTCGTCACACTTGTTGTACACATTACCCTTTTACGAGCAGAGACCCT
CC_OL_002_M17	CC1G_14428												+		+								CAGCTGTCTTTGTGGCAACGTTTCCATTACCGAGTCATGCGGATTGCATCTTTCAATACTGTTTCGGGAA
CC_OL_002_M18	CC1G_07058																						GTATCGAGAAGTTGAATCTTGATGGTCACCCGCTGATATGGACGGATTTCGCGTGCGCTCGGACAATGTT
CC_OL_002_M19	CC1G_07064										+					YPL231W	FAS2	Alpha subunit of fatty acid synthetase, which catalyzes the synthesis of long-chain saturated fatty acids; contains beta-ketoacyl reductase and beta-ketoacyl synthase activities; phosphorylated					CTCTCTCTCGCATTCTGACACTACTGCCGTCGCATTCGCACAAGCATCTTCTGCATAATTTGTCCTCGCT
CC_OL_002_M20	CC1G_07067																				0		ACACAGAAGAGAAACGCATTGAATGGCTTTCAAAATTCTTGGATATATTCTTCCGAGCTTTCTTGCCTTC
CC_OL_002_M21	CC1G_07096																						GTTCTGGTGCATCATTCTCAAGCAGTCTTAAATTCTTGTGGACCATTCCGTGTACAGTATCCCGCCCGGC
CC_OL_002_M22	CC1G_07109		+													YML131W		Putative protein of unknown function with similarity to medium chain dehydrogenase/reductases; expression induced by stresses including osmotic shock, DNA damaging agents, and other chemicals; GFP-fusion protein localizes to the cytoplasm			0		GTCGAGAAGGCCTTTGACTACAAGAGCCCGAGCTTTTTCGCTGATGTGAAGAAACATGTGGGGTACTTGG
CC_OL_002_M23	CC1G_07602												+		+								CATCAGATGCTGGGAGTTACTTCAACGATCGAGTTTTGGGTGTCGTCGATTACGGGCTGGCGAATGTACA
CC_OL_002_M24	CC1G_07583												+			YMR214W	SCJ1	One of several homologs of bacterial chaperone DnaJ, located in the ER lumen where it cooperates with Kar2p to mediate maturation of proteins					TTCTACGAAACGCCAAATCTATGATAGACATGGAGAGGAAGGTCTCAAGGGACACGAAGGCGGTCAGCAG
CC_OL_002_N01	CC1G_10062															YCL047C		Putative protein of unknown function			0		CATCTACTCCTTTGAGAAGGACGGGAAAGGCGATAAAACGGAAAGACCGGTGTTGAGGGGGATGAGGTTT
CC_OL_002_N02	CC1G_06225																				7		TGTCGATTCGACCACTTTTAAGATCTCGAAGACGATTGCGGCTGCTGAGGTTACGGTTGAACCTGGTGCA
CC_OL_002_N03	CC1G_06210																						GTCCCACGAGGAATATGAACTTGGCGGGCTCCTGGAAACCCGAAAGTAGCTTTAGGTCTCTATGCTGTAA
CC_OL_002_N04	CC1G_06175		+																				AACGTTACCTGTCTAAGCGCTCGATTCTAGGCTGCGGGGGACTTTGGGAGCAAATCCCTTATCAGAATCT
CC_OL_002_N05	CC1G_06170															YDR196C		Putative dephospho-CoA kinase (DPCK) that catalyzes the final step in Coenzyme A biosynthesis; essential for viability; the authentic, non-tagged protein is detected in highly purified mitochondria in high-throughput studies					TCTTGTTGTATTCTACAGAGGACAACTAATTTATTTCCCCTGGCCCGACCTTCGTTCGTTGAACGCTGTC
CC_OL_002_N06	CC1G_06209																				0		AAAAATCGGGATATTGTGACAACTGGGTCCCAGACTGAGATGGCAGCGAGGTTAGCAGAGATCTTGCGCA
CC_OL_002_N07	CC1G_06231																						TCGCAGCCTAACTCTCCCTTCCACGACACCATGATCCTTCCTTTCGCAGTCGATCAAATAGATACCCCAT
CC_OL_002_N08	CC1G_06236																						CGCGACACCGGCGACCAATTTCTCTTGTATCATTACTCTAATGCGAAGCACTGTAATACGGGCCCAATCG
CC_OL_002_N09	CC1G_06255															YML067C	ERV41	Protein localized to COPII-coated vesicles, forms a complex with Erv46p; involved in the membrane fusion stage of transport; has homology to human ERGIC2 (PTX1) protein			6		GAACATGTGGACCACCACCTTATGAACCTTTCGCACGTCATCCAAGAATTCTCCTTTGGGCCTCACTTCC
CC_OL_002_N10	CC1G_08095																				6		ATGATCTTCTTCCTAGTCTGCATCACCTCATTCGCTTGGACAACGGGTACCCTTAACCAACCTTCCGAGC
CC_OL_002_N11	CC1G_04061																				0	coH24	CACCCTCGCTGCCTCCGCCATGGCCGCTCCCACCAGCGGCGTCGTTGCCCAGTGCAATGGAGGTGTCGTC
CC_OL_002_N12	CC1G_04120															YPR020W	ATP20	Subunit g of the mitochondrial F1F0 ATP synthase; reversibly phosphorylated on two residues; unphosphorylated form is required for dimerization of the ATP synthase complex			4		TCCGGCAATTCGCAGCGAGCGGCCAGGTTGCTCAAGTCGGAGTATACGGATTGCAGGCTTACACCATCTT
CC_OL_002_N13	CC1G_00464	+														YOR370C	MRS6	Rab escort protein, forms a complex with the Ras-like small GTPase Ypt1p that is required for the prenylation of Ypt1p by protein geranylgeranyltransferase type II (Bet2p-Bet4p)			0		TTAGCCCGACATCTCATTGTTCCGCCCCTTAACTACTCGACCTTTCCGGACTTTCCTGATAATGCAACCC
CC_OL_002_N14	CC1G_00461															YKL016C	ATP7	Subunit d of the stator stalk of mitochondrial F1F0 ATP synthase, which is a large, evolutionarily conserved enzyme complex required for ATP synthesis					ATCGGCATACGTCCCGATGGACCTGCCTTGGCAGCCTGTTCTAGACTATGAGCATAGAGCCCAAGGACTG
CC_OL_002_N15	CC1G_00417															YFL022C	FRS2	Alpha subunit of cytoplasmic phenylalanyl-tRNA synthetase, forms a tetramer with Frs1p to form active enzyme; evolutionarily distant from mitochondrial phenylalanyl-tRNA synthetase based on protein sequence, but substrate binding is similar			0		TTTCTACTTGTCTGATCCAAGCCATTCACTTCCTCCCGAGCCCGAATACTACAAGCGTGTATCGACCGTC
CC_OL_002_N16	CC1G_00344												+		+	YCL043C	PDI1	Protein disulfide isomerase, multifunctional protein resident in the endoplasmic reticulum lumen, essential for the formation of disulfide bonds in secretory and cell-surface proteins, unscrambles non-native disulfide bonds					GGGCATCCACCGGGAAGAGCTCTGATCACCTAGCATATTAGCGCCTGCTTTACTTATCGACTAATGGATC
CC_OL_002_N17	CC1G_00317		+													YNL241C	ZWF1	Glucose-6-phosphate dehydrogenase (G6PD), catalyzes the first step of the pentose phosphate pathway; involved in adapting to oxidatve stress; homolog of the human G6PD which is deficient in patients with hemolytic anemia			0		TAAGATTCCAGAAGCATACGAAAGCCTTATCCTCGACGCTCTTCGGGGCGACCATTCCAACTTTGTTCGC
CC_OL_002_N18	CC1G_00298																				4		ATTGTTCTTCAAGTGCGAGCCATCCTCCGGCTTCTCCGGGGTATTCATGTTCTATCAACAGTATGTCGCC
CC_OL_002_N19	CC1G_00238															YML063W	RPS1B	Ribosomal protein 10 (rp10) of the small (40S) subunit; nearly identical to Rps1Ap and has similarity to rat S3a ribosomal protein			4		AGCTGCGACTTGAAGGAGTTGGTCCAGAAATTCGTGCCAGAGGCTATCGGTCGTGAGATCGAGAAGGCCT
CC_OL_002_N20	CC1G_00190																						GGAGACCGAACATTGAAAGATGTCGTTATCCCCGATTGCCCTCCACCCGAGTAAAATACCCGCTCCATTT
CC_OL_002_N21	CC1G_00147															YIL053W	RHR2	Constitutively expressed isoform of DL-glycerol-3-phosphatase; involved in glycerol biosynthesis, induced in response to both anaerobic and, along with the Hor2p/Gpp2p isoform, osmotic stress					AAAGCCCAACCCAGACCCGTATCTCATCGGCGCTGCCAGGTGCAACGTGGATCCCAAACGATGCCTTGTC
CC_OL_002_N22	CC1G_00095															YDR397C	NCB2	Subunit of a heterodimeric NC2 transcription regulator complex with Bur6p; complex binds to TBP and can repress transcription by preventing preinitiation complex assembly or stimulate activated transcription; homologous to human NC2beta					GCCGAAATCCTGCCAAACGATGTAGTTTGCGCGAAAGAGACGCGTGATCTTGTCATTGAGTGCTGTGTAG
CC_OL_002_N23	CC1G_00086																				0		CATTACCCTGAGCATGGTGTTCCATTGACCAACTTGGAGTACGGCGTTATGGCTGAGCTCCTTGGCTATT
CC_OL_002_N24	CC1G_00058												+		+	YDR232W	HEM1	5-aminolevulinate synthase, catalyzes the first step in the heme biosynthetic pathway; an N-terminal signal sequence is required for localization to the mitochondrial matrix; expression is regulated by Hap2p-Hap3p					TGTTTTCTGCTTCGATTATCCGGTCATCTGCACCGCCTGTCTATGTCTTCGTCGTGACTTTGCCCCTGTA
CC_OL_002_O01	CC1G_00016												+			YGL010W		Putative protein of unknown function; YGL010W is not an essential gene			0		ATTGCCGGTGGACTCCATGCCATTTCGTGGATTGCTCAGTTCATTGGGCACGGGTTTGCGGAGAAGAGGG
CC_OL_002_O02	CC1G_00036															YLR420W	URA4	Dihydroorotase, catalyzes the third enzymatic step in the de novo biosynthesis of pyrimidines, converting carbamoyl-L-aspartate into dihydroorotate			0		ATTCGGATGGAGGCATCGAATCCTACGAAACCTACTACCCCATCTTCGCTGCCATGGAACAAGTTGGCAT
CC_OL_002_O03	CC1G_00051												+			YKR071C	DRE2	Protein of unknown function required for iron-sulfur cluster assembly and sister chromatid cohesion; mutation displays synthetic lethal interaction with the pol3-13 allele of CDC2					GCTCGTGTTCCCGTGCTTACCACTACTGAATGGATTATGTCGTCTTGTGTTCAAGGTGGCGTCGTAAACC
CC_OL_002_O04	CC1G_14591															YMR314W	PRE5	Alpha 6 subunit of the 20S proteasome					GGACTGACCTCGGACGCGCGTGTATTGAGCAATTTCATGAGACAACAAGCCATGTCTTCGCGAATGATCT
CC_OL_002_O05	CC1G_00146															YML085C	TUB1	Alpha-tubulin; associates with beta-tubulin (Tub2p) to form tubulin dimer, which polymerizes to form microtubules			0	alpha2 tubulin	TGATCGCTGGCAAGGAAGACGCCGCCAACAACTATGCCCGTGGTCACTACACCGTCGGAAAGGAACTCAT
CC_OL_002_O06	CC1G_00158												+		+								GCTCGGAGGCTCGTTGGTGATGTAACTGCACACCTCAGTTGTCACAGAGAAAACCATATACGTCTCCCAT
CC_OL_002_O07	CC1G_00173	+																			4		CACAATTACAGGCGAGGACTTGTATGAACTGTTCGGTCGGTATGGGAGCATTCGTCAAATACGGATAGGC
CC_OL_002_O08	CC1G_00183																				3		ACAAGACCCTGTCAACTCTACACTCCAAAGTCACCAAGAAAGCCTGGGACGAGGCTTATGCTATCCTGGA
CC_OL_002_O09	CC1G_00201	+									+		+		+	YJL026W	RNR2	Ribonucleotide-diphosphate reductase (RNR), small subunit; the RNR complex catalyzes the rate-limiting step in dNTP synthesis and is regulated by DNA replication and DNA damage checkpoint pathways via localization of the small subunits			0		TCCCTTGCATTAAGAAGAAGGCCGACTGGGCCCTCACTTGGATTTCAGACCAGAAGTCTACATTCGCTGA
CC_OL_002_O10	CC1G_00206															YJR054W		Vacuolar protein of unknown function; potential Cdc28p substrate					TCCTCAATATGGTCAAGACCAGAACAATTACGGGTCGGGCGCATATCGTCCATCGTAGCAGCTATCCTAC
CC_OL_002_O11	CC1G_14613															YML092C	PRE8	Alpha 2 subunit of the 20S proteasome			2		ACTGGCCGTAACTTCGATGAGATCATTCGAGTCATCGACTCTCTCCAACTCGGCGACAAGCACCGTATCA
CC_OL_002_O12	CC1G_00231																				0		CCAAGTGATTTGTTGGTCATGGGTGCATGGTCAATAGTTCGCCAAAATATCCCGTCGGCCGATGCTATCC
CC_OL_002_O13	CC1G_00270	+																			0		CTCGCAAAGAAGCTTGCAAAGGGCCACAACCCCACATTCGTTTCACCTACTGATAATCTCATGACGCCTG
CC_OL_002_O14	CC1G_00284															YFL028C	CAF16	Part of the evolutionarily-conserved CCR4-NOT transcriptional regulatory complex involved in controlling mRNA initiation, elongation, and degradation; putative ABC ATPase; interacts with Ssn2p, Ssn3p, and Ssn8p			0		ATGCGCTTTGGTACATTTGTGGAACCGCCGATTACATGGCCTTTGAGTTCCCTTGGGGAAGCCAAGTCTA
CC_OL_002_O15	CC1G_14631											+		+		YOR198C	BFR1	Component of mRNP complexes associated with polyribosomes; implicated in secretion and nuclear segregation; multicopy suppressor of BFA (Brefeldin A) sensitivity					GCCGTGGAGGCCGATTCATAGGGTTACTCCTTAATGTCGGTAGCGGGTAGTAGATCGTAGTCGCAATAAT
CC_OL_002_O16	CC1G_00312												+			YFL002C	SPB4	Putative ATP-dependent RNA helicase, nucleolar protein required for synthesis of 60S ribosomal subunits at a late step in the pathway; sediments with 66S pre-ribosomes in sucrose gradients			0		AGCGTGCCATGAAGAAAAAGGCATCCGCACCTTGGAGTGAACAAGCGGGTAGGAAAGACGAAAAGGCAAA
CC_OL_002_O17	CC1G_00332															YPL154C	PEP4	Vacuolar aspartyl protease (proteinase A), required for the posttranslational precursor maturation of vacuolar proteinases; important for protein turnover after oxidative damage; synthesized as a zymogen, self-activates			0		TTGTGCCTCCGTTCTACAACATGATCAACCAGAAGTTGATCGACTCACCTGTGTTCGCCTTCCGCATTGG
CC_OL_002_O18	CC1G_00350															YOR136W	IDH2	Subunit of mitochondrial NAD(+)-dependent isocitrate dehydrogenase, which catalyzes the oxidation of isocitrate to alpha-ketoglutarate in the TCA cycle; phosphorylated			0		TTGCCAATGTCCGACCATGCGCGTCCATCAAGGGGTTCAAGACTGCCTATGATGATGTAAACACCGTTCT
CC_OL_002_O19	CC1G_00351															YDR293C	SSD1	Protein with a role in maintenance of cellular integrity, interacts with components of the TOR pathway; ssd1 mutant of a clinical S. cerevisiae strain displays elevated virulence			0		CTTGACGAAGAGCCCTCCCGTCATCAAGGTCTATAGCGTCAACCCCTACTCTTTCGAGCAACAGAAGAAA
CC_OL_002_O20	CC1G_00359															YFR041C	ERJ5	Type I membrane protein with a J domain is required to preserve the folding capacity of the endoplasmic reticulum; loss of the non-essential ERJ5 gene leads to a constitutively induced unfolded protein response			4		GGCCGTGCTGGCCACGTCCGTTTTTGCATGGGATAATCTCGACCATGAAATATTCGACATGGTATCCGAA
CC_OL_002_O21	CC1G_00362	+														YPR035W	GLN1	Glutamine synthetase (GS), synthesizes glutamine from glutamate and ammonia; with Glt1p, forms the secondary pathway for glutamate biosynthesis from ammonia; expression regulated by nitrogen source and by amino acid limitation			8		TCGCAGAAACTTACAACAACGATGGAACTCCCAACAGGACAAACTTCCGTCACCATGCCGCCAAGGTGAT
CC_OL_002_O22	CC1G_00367															YCL030C	HIS4	Multifunctional enzyme containing phosphoribosyl-ATP pyrophosphatase, phosphoribosyl-AMP cyclohydrolase, and histidinol dehydrogenase activities; catalyzes the second, third, ninth and tenth steps in histidine biosynthesis			1		AGTGGTGTCAACACCCTCTCCTTCCAGAAGCACATAACGTCACAAGAAATCACTGCAGACGGTCTTGGAG
CC_OL_002_O23	CC1G_00372															YNL037C	IDH1	Subunit of mitochondrial NAD(+)-dependent isocitrate dehydrogenase, which catalyzes the oxidation of isocitrate to alpha-ketoglutarate in the TCA cycle					ACAGTCGACATGGGCGGCTCTGCGACTACCTCCGAACTCACCGCTGCTATCATCAAAAAGCTATAAACAT
CC_OL_002_O24	CC1G_00380																				0		AACCAGAGATCTCAAGGCTTCACAATTCGCTGGCCAAACTGAAAGAGACGCAGGGGGAGCTCAAGAAGTG
CC_OL_002_P01	CC1G_00395															YNL067W	RPL9B	Protein component of the large (60S) ribosomal subunit, nearly identical to Rpl9Ap and has similarity to E. coli L6 and rat L9 ribosomal proteins			4		CGGGAAGCCGCAAGCACGTCGCCTGCTTGCGAACCATCCGTACCATGATCAACAACATGGTTATTGGCGT
CC_OL_002_P02	CC1G_00400																						CCCGAGTCCTCGAACCCAGAATAGTCGAGGGTGAGTAAGGAAGGTTTACTTCTCCTCGGTGCAGTAAATT
CC_OL_002_P03	CC1G_00412															YLR060W	FRS1	Beta subunit of cytoplasmic phenylalanyl-tRNA synthetase, forms a tetramer with Frs2p to generate active enzyme; sequence is evolutionarily distant from mitochondrial phenylalanyl-tRNA synthetase (Msf1p), but substrate binding is similar			2		GCCGATCTCTGGGAGAGGTTGGGCAAGGAGTACACCACCGAGGAATTCGATAAATTGTGTTTTGAGTATG
CC_OL_002_P04	CC1G_00435	+													+						0		TACTAGATCCTTTGATTGCGACAGGTGGAACGGTGTGTGCAGCTATTGGCATGCTCACAGAGTGGGGTAT
CC_OL_002_P05	CC1G_01456																						CCGTTGACCCGGACTAAGCTCTTTACTCTAATACACCCTACTATGCCTTCCTTTCCGAGCTCGTTGGATC
CC_OL_002_P06	CC1G_01407																						CGCTCTTCAGCATGACTATGACAAGATCGTATCGCAGTACAGTCGCATCTTCCTCTGGACCACGATCAAC
CC_OL_002_P07	CC1G_01401																						AGTATGTGGGAACTGGTACAAGACTTACAGGATATGGGCGAAAGCAACGCTGTCATCGGAAGACGTACCC
CC_OL_002_P08	CC1G_01359															YEL011W	GLC3	Glycogen branching enzyme, involved in glycogen accumulation; green fluorescent protein (GFP)-fusion protein localizes to the cytoplasm in a punctate pattern					CAACTTCGACCGCGAAATGAACACTTTGGCCGGGAAGTATAAATGGCTAGACTCTCCCCAGGCATACGTT
CC_OL_002_P09	CC1G_01355															YOR087W	YVC1	Vacuolar cation channel, mediates release of Ca(2+) from the vacuole in response to hyperosmotic shock			0		CGGGCTCCCGACTCGTTCGTTTACCCAGCTCCTTTCAACATCATTGAAACTTTCTTCATCGCACCTTTCG
CC_OL_002_P10	CC1G_01328		+													YHR087W		Protein of unknown function involved in RNA metabolism; has structural similarity to SBDS, the human protein mutated in Shwachman-Diamond Syndrome (the yeast SBDS ortholog = SDO1); null mutation suppresses cdc13-1 temperature sensitivity					TAGCATCCAACCCACGGACGCTCTTACTTCGTGTTTTCGATGTAGCGTTATTGTTGTCAATCCAACCGTG
CC_OL_002_P11	CC1G_14673															YNL139C	THO2	Subunit of the THO complex, which is required for efficient transcription elongation and involved in transcriptional elongation-associated recombination; required for LacZ RNA expression from certain plasmids					GATCCTCACGCGGGCGACAAGAGCCAGCGACGACAGGATTGATTTTCTTGGTTAAACATAGCGCTAATCT
CC_OL_002_P12	CC1G_14669															YOR096W	RPS7A	Protein component of the small (40S) ribosomal subunit, nearly identical to Rps7Bp; interacts with Kti11p; deletion causes hypersensitivity to zymocin; has similarity to rat S7 and Xenopus S8 ribosomal proteins			4		GCGGCAAAAAGGCCATCGTTATCTTTGTGCCCGTTCCTCAGTTGAAGGCTTTCCACAAGGTCCAGCAGAG
CC_OL_002_P13	CC1G_01283										+	+				YLR452C	SST2	GTPase-activating protein for Gpa1p, regulates desensitization to alpha factor pheromone; also required to prevent receptor-independent signaling of the mating pathway; member of the RGS (regulator of G-protein signaling) family					CTGTCCTGGCGGCGCCCTATTTCTATTTCTACCTTCGACTACCCATTTAATTGCTTCCCTGTCACCAGAC
CC_OL_002_P14	CC1G_01253																						GGATGCGAGTCGTACGGACCGGAGGTCTTTATTCCCTTCGCGTGGAGGTTTAGATATCTTTACTGGCAAA
CC_OL_002_P15	CC1G_01254										+		+		+								GGCCCCGGTATTCGTTACAGTTGTTATTACTTGTGGTCCATTTAGCAATGCCCATGATTGCTTTTCCGTC
CC_OL_002_P16	CC1G_01261															YNR047W		Putative protein kinase that, when overexpressed, interferes with pheromone-induced growth arrest; localizes to the cytoplasm; potential Cdc28p substrate					TGTTGTTCAAAGCGTTCAACAGTATAACGCTGCACCACGACGGGGACACATGAGTTGTGAGAGACGTGCA
CC_OL_002_P17	CC1G_01290												+		+	YOR063W	RPL3	Protein component of the large (60S) ribosomal subunit, has similarity to E. coli L3 and rat L3 ribosomal proteins; involved in the replication and maintenance of killer double stranded RNA virus			4		TTGGGCCAACCACCTTTCTGACGAAGTCAAGCGCCGATTCTACAAGAACTGGTACCGATCCAAGAAGAAG
CC_OL_002_P18	CC1G_01298															YIL038C	NOT3	Subunit of the CCR4-NOT complex, which is a global transcriptional regulator with roles in transcription initiation and elongation and in mRNA degradation			4		GTTCCAGCGACATTCTGAGCCTCAAGCCATCACCGAAGAGTATGAGCAAGGGGTATACGTCTATTTCGAC
CC_OL_002_P19	CC1G_01356															YLR370C	ARC18	Subunit of the ARP2/3 complex, which is required for the motility and integrity of cortical actin patches			2		AGGAACTATCCGCAAGGCTCGTTGAGAAGCTGTATGCAGATGGTACTGGGAAACCCAGCAAATGGTGGAT
CC_OL_002_P20	CC1G_01375		+																		0	alpha1 tubulin	AAGAAGTCCAAGCTTGAGTTCAGCGTCTACCCCGCTCCTACCTTGGCCAACTCCGTTGTTGAGCCCTACA
CC_OL_002_P21	CC1G_01383															YJR090C	GRR1	F-box protein component of the SCF ubiquitin-ligase complex; involved in carbon catabolite repression, glucose-dependent divalent cation transport, high-affinity glucose transport, morphogenesis, and sulfite detoxification					AATCAGAATAATGCTGGGTCTTCAACTACTCACGCTACTCATTGGTTCGGCGGACGGTAACGCCATCGTC
CC_OL_002_P22	CC1G_01388															YKL125W	RRN3	Protein required for transcription of rDNA by RNA polymerase I; transcription factor independent of DNA template; involved in recruitment of RNA polymerase I to rDNA			0		TGAACACATTCTTCCCATTCGATCCCTACCGCCTACCCAAGTCCAATTCGTTCATCCAGAGCGTGTACAG
CC_OL_002_P23	CC1G_01392															YGL203C	KEX1	Protease involved in the processing of killer toxin and alpha factor precursor; cleaves Lys and Arg residues from the C-terminus of peptides and proteins			7		ATCAACTGACCAGTATGCTAAAACCATGAAAGATGCTCAATGGCACATCCTCGAATTCCTCAGGAACTTT
CC_OL_002_P24	CC1G_14685	+														YMR047C	NUP116	Subunit of the nuclear pore complex (NPC) that is localized to both sides of the pore; contains a repetitive GLFG motif that interacts with mRNA export factor Mex67p and with karyopherin Kap95p; homologous to Nup100p					GTCGCTTGAACGATTCTGAACCGACTTTGGACGCATCTCTCTTGCCGCTTTTATGCTCTCATGGATGGTC
CC_OL_003_A01	CC1G_01418															YDR099W	BMH2	14-3-3 protein, minor isoform; controls proteome at post-transcriptional level, binds proteins and DNA, involved in regulation of many processes including exocytosis, vesicle transport, Ras/MAPK signaling, and rapamycin-sensitive signaling			0		ACTATGGACTTCGGATATGCAGGATTCTGCCGACAAGCCTTCTGAGGGCAAGGATGAAGCTGGTGATGCC
CC_OL_003_A02	CC1G_08163																						AATGATCGGTGGAAATGTTCTACTTTCACCTACGTTCCGCCCACAATGCAGCGTGCTTCCTCCCTTTTGG
CC_OL_003_A03	blank																						0
CC_OL_003_A04	CC1G_08143																				0		CAAGGACTGGAAGAACCCTGAATTCCCGCATAAGACGATATGTCCTCTACTCACGGAACTGGTGAGGATC
CC_OL_003_A05	CC1G_08134		+													YDR400W	URH1	Uridine nucleosidase (uridine-cytidine N-ribohydrolase), cleaves N-glycosidic bonds in nucleosides; involved in the pyrimidine salvage and nicotinamide riboside salvage pathways					TGCACTCTGGTGTGGATTGGTATTGGGGATCGGAAAGGATGCGATGGAACACGAAAGCAAAGCCCGATTA
CC_OL_003_A06	CC1G_08167																						CCCGACCCGCTCACCCTTTCATCATTCCTTCCCTCTTATCTGTATGACACTCTTCCCTAACTTGTTGTAG
CC_OL_003_A07	CC1G_08678																						GAGGTCCAGAGTCAGACCTGCTTACAATTAAACTCGGGGATTACGGATACCACCCGCCACTCTACTTTAC
CC_OL_003_A08	CC1G_06970		+										+								7		AAGATATCCTTAACCTTGTCTATCTTAGCGAGAGCCTGCACCTCCCCGAGGTTGCTGCTTACTGGAAGCA
CC_OL_003_A09	CC1G_06964																						CCGATTGGTGGACTTGCGCTTCACTCTTTGCCCGTTCACTTCAGTACCAGTATTCGAGTTCTCCGTTGTA
CC_OL_003_A10	CC1G_06963															YHR008C	SOD2	Mitochondrial superoxide dismutase, protects cells against oxygen toxicity; phosphorylated					CGACCGTAAAGGGCAGAGCTAGCGCCTTTCTGCTTGTAGACGCTCACAATGAATATGTACGTTTTGTTGG
CC_OL_003_A11	CC1G_06939															YHR168W	MTG2	Putative GTPase, member of the Obg family; peripheral protein of the mitochondrial inner membrane that associates with the large ribosomal subunit; required for mitochondrial translation, possibly via a role in ribosome assembly					GACAACGGTATGTGATGACACTCCTTTCCTGATGAGTCTGACGGTGACGCTGTATAGGGCTTTCGCACTT
CC_OL_003_A12	CC1G_06932												+			YMR178W		Putative protein of unknown function; green fluorescent protein (GFP)-fusion protein localizes to both the cytoplasm and nucleus and is induced in response to the DNA-damaging agent MMS; YMR178W is not an essential gene					GTAACACAGGCAGGGGCATCAGAAAGCTAACTACTTAGAAGTACAGATAATACACGTTTGAGAGGCATCA
CC_OL_003_A13	CC1G_06951																				0		CCTCTTACTTTACAGCATGCATCTATCAGACGAAGAGCTGCGACGCCCAGTTCAGTGGCCTGAAATCTTC
CC_OL_003_A14	CC1G_12474								+												0		TCTCGCTCTCTACGGTTGGACGAGGAACCCTCTGATCGAATACTATGTCATCGAATCCTACGCTGTTCTC
CC_OL_003_A15	CC1G_11437										+		+		+						7		GTTTTGGGAGGCCTTGTTGGCGCGGCCATCATCTATGGATCGTATTTCCATGCGATTGAAATCTTCGAGG
CC_OL_003_A16	CC1G_11438															YER048W							GTGGATCGAAGTTAGAAGGGAAGGAGATCTTCAGATAGGGTTTTCGACATGGTTGTGCATTGCGTGCGCC
CC_OL_003_A17	CC1G_11441															YOR182C	RPS30B	Protein component of the small (40S) ribosomal subunit; nearly identical to Rps30Ap and has similarity to rat S30 ribosomal protein					CAGGAGAAGAAAAAGACTCCCAAGGGACGTGCTAAGAAGAGGCTCCTCTACAACCGACGATTCGTCAATG
CC_OL_003_A18	CC1G_15574																						GACTGCCAAGTTCCGGTCGTTCCATCCTAATTTCGTTTTGGGGACTCGTTCAGGAATAGACTAAGAGGGC
CC_OL_003_A19	CC1G_09830																						ACACTTCACTCGATGTGCAATAAGTACTCGACGCCCAAGGGAACGAGGTTCTTCTACGGCAAGGAGAACT
CC_OL_003_A20	CC1G_09823																				0		CTCATGATGCACACCCGGTCAATGAGCGAAGATTTGAAGCCACCCAGTATCAACCAGAACAGGGAATCGA
CC_OL_003_A21	CC1G_10323																				0		GTCTGGCTGGGAGGCTTTCAGGCTATTCTCCGTGACATGGAAGGGGTGAGGTATAACTTTTATCTGGATG
CC_OL_003_A22	CC1G_10314																						CCTCCTCTAAGCAGCGGTAGAGTGCTTCGATGCTTTGCAATCCTTTTTACACATAGACGTCCCAAGTGCG
CC_OL_003_A23	CC1G_10315		+		+								+										TCTTCGCGATTCGTCACCACCTTTTTGGGCTCGATAATACACGGACCACCATTTTACCCACTGTAGTAGT
CC_OL_003_A24	CC1G_10334															YML010W	SPT5	Protein that forms a complex with Spt4p and mediates both activation and inhibition of transcription elongation; Spt4p-Spt5p complex also plays a role in pre-mRNA processing			0		TCACCGTCGACAAGGACAAGCTCAGGAAGATGGGTCCTGACAAGAAGCTCTATCAACTCAATGACCATGC
CC_OL_003_B01	CC1G_11986															YGL253W	HXK2	Hexokinase isoenzyme 2 that catalyzes phosphorylation of glucose in the cytosol; predominant hexokinase during growth on glucose; functions in the nucleus to repress expression of HXK1 and GLK1 and to induce expression of its own gene			0		GGGAGCCTTCGATTCACACAATCATGAACACCTGCCCCGAACCAAGTACGACATAAGTATAGACGAATCG
CC_OL_003_B02	CC1G_09510															YBR039W	ATP3	Gamma subunit of the F1 sector of mitochondrial F1F0 ATP synthase, which is a large, evolutionarily conserved enzyme complex required for ATP synthesis			0		CGGAAAGGAATACGGTTTGGCCAACTCTGAGGTCTTCGAGCACGTCCCAACGGACAAGGCCGGTGGCAAG
CC_OL_003_B03	CC1G_15590																				0		GGACCGTGCAGAGGTGCGGCTGCGCGCTTGGCGTCTAGTTAGTGCGTCTGTAGATCTACTAATGTTAAAT
CC_OL_003_B04	CC1G_15600												+										AAGGGTCTCGCTGGAGAGTGGGCTCAGTATGGCATCCGGGTCAACGCTTTGTCTCCTGGTTATGTTAACA
CC_OL_003_B05	CC1G_15593																						ATGCGGATATTGAAGGTGCGTCTGCGTTCCAGTTTATCTTTAGTCCTCAGCCCTGACTGATGCGCGTCTA
CC_OL_003_B06	CC1G_07500														+	YLR406C	RPL31B	Protein component of the large (60S) ribosomal subunit, nearly identical to Rpl31Ap and has similarity to rat L31 ribosomal protein; associates with the karyopherin Sxm1p; loss of both Rpl31p and Rpl39p confers lethality			4		TCAAAAAGCGCGCTCCATGGGCCGTCAAGTCTATTATTGAATTCTCCCAAAAGCACATGGGCACCTCCGA
CC_OL_003_B07	CC1G_07492																				0		ACCCCAGCTGGGCGATAACACCCTTCACGCTCCTAACCTCCTGACTCCGACGTCTTCGACATGTCCTTCT
CC_OL_003_B08	CC1G_05645																				0		TCAATATCACCCTCATGGCATGGGTAACGTGGACTGTGGTTGCATTCCTGTTCTTCGTCTTCACCCTGGC
CC_OL_003_B09	CC1G_05645																						AATCAAAGTGGCTACTGACACGAATACTCTCTCCGAGGCCAGAGAGGGAAAGCGCAAAGCTGTGTTCGAA
CC_OL_003_B10	CC1G_05643																				0		TGATGGTGAGGGTAAAGAGCCTGAAAAGAGTTTGGCCACGCAGATGACTTCGAAGAAGCGTAAGAGGGAT
CC_OL_003_B11	CC1G_05640																						TTTGATGGAGTCTACGAACGCAAAGGAGATGCCAGAAGGACAACGAAGCCACTGGAACTTAGAGGGGAGA
CC_OL_003_B12	CC1G_05638																				0		TGCCTCCTCTTCCGGTAACTGCACCGACAGGAAAAAGTCCAACTGCACCTCGTACGAGGGTATCTGCTCT
CC_OL_003_B13	CC1G_05636																				0		GCTCCTCGGTGCCTCATCCGAGGAATCTACGAAGACGTTAGGGATAATATGAACAGAACAAGTATCGCGG
CC_OL_003_B14																					0	pcna	GAAGCGGACGTCCTCAACCTCATCTACGAAGCCAAAAACTCTGACCGTATCGCCGAATACGAAATGAAGT
CC_OL_003_B15	CC1G_05632																				6		AATGCCCGGAGACTTCCCTGATACTTTCTACGGTGAACAAACGACGCAGACTCGACTTCAATCCGATACC
CC_OL_003_B16	CC1G_05630																				0		GATGCTCAGGTACCGTCCGGAGGAGCGGATTAGCATGGCGGAGGTGATTCAACATCCTTGGTTTAATTAT
CC_OL_003_B17																					0		GAAACTCCGTACCAGGCCTATCGTTCCGCACACACTTCTCCCGCCCGCCAAGACCAGCTCCTTCAAGCTT
CC_OL_003_B18																							AGTGTCACGACGATCCTACCTCTGGACATCCCGGTGTACATGGAACCCTCGAACGAGTTGAACGACAGTA
CC_OL_003_B19																					0		ACCGTCGTCAAGGTGCAGAACCCGGAGCCTGCCAATGTCCTTATCAAAAAAGGGACTATGGTAGCTATTG
CC_OL_003_B20	CC1G_05621																				0		CCATGGTCCATTGTTATTTTCTCATGCGCGTGCTCACGACTAGTCCTCAACATCCATATCTACGGGGGAA
CC_OL_003_B21	CC1G_05616				+									+									TAGAGCACGTTCGGTTGGGAGAGGCCGACGGAAAACCGCTTCAGGTGATGATTTTTGGAATGAGCGTAAT
CC_OL_003_B22	CC1G_05615																				0		AAACAAACCCTCGTTGCGAGTGGAGTACATTCAGTGTGCGATCCTCCTTGGCTATGTCGAGGATATCCTC
CC_OL_003_B23	CC1G_05613																				0		CTTACCCCAGACTTCCCTACCGAGTTACGCACTTCGTCCTATTCTCCCCCGGAAAGCCAACTAATGACTT
CC_OL_003_B24	CC1G_05609																				0		GTGTTGTCCGAATGCTCTGATGTGGCAGACGTCGGTGTAATAGGTGTTCCTGATGACTACTCTGGCAATG
CC_OL_003_C01	CC1G_05608																				1		GTGGTGGGCACGTCACTGGAGGTTGGCTCCCCAGCTACAACATTCCCTCGATCCTGCTTCAAATCAAGCT
CC_OL_003_C02	CC1G_05607																				0		GTCCGCCACTCTACCCAACTCGACAATTACATCAAGACCGCATTCACCAAGATTGCTAATCGTGGCGATG
CC_OL_003_C03	CC1G_05602																				0		AGTTCCTCGAAATGTTTGGGGATGAACTAAAGGGTAGAGAGGATGATCAGGAGGGGCGAGTCCATTGGCA
CC_OL_003_C04	CC1G_05599																				0		ACGACAAGACTACATCCGTGCCGTGAAATGTCTGATGTCCACTCCATCGACTAGCACTCGCCGCGGTGTA
CC_OL_003_C05	CC1G_05597																				0		GCACAGTGTCTCTTCCCTCGATTGAAGTACTTGGATTTTGGGACGGTCCACCCATTCCGTGATGAATTCG
CC_OL_003_C06																							GCCCAGGCCTTCCTCGATGCCTGTGTCCTCTACTTCAAGCACATCAGAGAAGCAGATGAATTACGACAAA
CC_OL_003_C07																							GGTTCATTAAGGGATACGGAGAGATCGCTAGGCCACTCACAGAACTGACCGGAAACAAGGAATGGACTTG
CC_OL_003_C08																					0		CGCCATCCCCAAGACTTCGGAAGACCATACACCCGGTAAGAAACCTCCACCACCTCCTCCCGAGCTGGTG
CC_OL_003_C09	CC1G_05592																				0		CATCAGTCACGACATCGCACGAGAGGCAGTCATCACCACCATGCAAAATCTTACCGTCGTTCCTCCTTCG
CC_OL_003_C10	CC1G_15765																				0		TAGCTGCCATGACTTGTGAACACACTGATCGAGATCCCTCACCCCATTCAGATTCGTCCGAGAATTCGTC
CC_OL_003_C11	CC1G_15764																						ATTCCGCTGGTGGGAGGTCGCATCACAACCTCTGACGCCTTCAGAGCGTTATTACAAAACATTTATGGCC
CC_OL_003_C12	CC1G_05588																				0		CGACCCCTCCGCGGCTACTTTGGGACAGACACCTGACGAAATGAACGAAGAAACTAAAAAGCTTGCTATG
CC_OL_003_C13	CC1G_05583																				0		CGAGATCGATAGTACGCAATCTGAGAACGACTGGGAGGAGATACACGTCGTCACCGAGGTGGATAAAAGT
CC_OL_003_C14	CC1G_05582							+								YNR050C	LYS9	Saccharopine dehydrogenase (NADP+, L-glutamate-forming); catalyzes the formation of saccharopine from alpha-aminoadipate 6-semialdehyde, the seventh step in lysine biosynthesis pathway; exhibits genetic and physical interactions with TRM112			2		GCTTGTGCTCGATGGTGTTATCACCAAGACTGGTGTGTATGCTCCTTATACCAAGGAGATCTGCGATCCC
CC_OL_003_C15	CC1G_05580																				0		TACTTCTTCACCTACTACGGCGCTTTCGTGCTTGATCCCGAGGGCAGGAACATTGAAGCCGTTTGCATGA
CC_OL_003_C16	CC1G_05575																				0		AACCAACATTCCTAACGTCTATCAGCCTCCTTTCCCCGCCTTGCAGCGCCTGAACATAGTTAACGTCCAT
CC_OL_003_C17	CC1G_05571																				0		AGGCTCCGCCTCGTTTGGTGGAACAGTATAGTAACCTCAGTGTGGGCTTCAAGGCCCTGATTTTTGATAG
CC_OL_003_C18	CC1G_15761																				0		GGACCGAACGGCTGGACCTCTCATGCCTACTCAGCAGCTCTACCTGATCAATCATAACCTTAACATTGAC
CC_OL_003_C19	CC1G_15760																						TGGAGTCGTAGCTTACCTCGGCGGTGGGACGAGGGATGTGTTCTTTTCGGGTGGGATGGTGCATGGGTTT
CC_OL_003_C20	CC1G_05568															YGR246C	BRF1	TFIIIB B-related factor, one of three subunits of RNA polymerase III transcription initiation factor TFIIIB, binds TFIIIC and TBP and recruits RNA pol III to promoters, amino-terminal half is homologous to TFIIB					GCTGGCGGAACTGCCGCTGAATCCGTGCGCAACCTGATCAAGAAGAACCCAAAGTATAGTAAGAGGATTA
CC_OL_003_C21	CC1G_05566																				0		CGGCTCGCTATCGACTGCGACGTGAACCAGTTCATTGAAGACGCACAACATGAAGATCTGAGAGACTTCT
CC_OL_003_C22	CC1G_05563												+								0		ATCTACCCTCACGGGTATTGGCCCTATCGCGAAGCTTTACTTTATCAACGACACGCTCGTTGCTGAAGAC
CC_OL_003_C23	CC1G_05554																				0		GGAACAACCCACCATATCGACATTGCTGAAATCCTCTCGGATAGCGAGAGGGCGCGGCTAATTAGAACTT
CC_OL_003_C24	CC1G_05548																				0		GCCTCTGGTACCGCTCGGTGGACAATGTGGAGGAATCACTTATAAAGGTCCGACTGGATGTGCGCAGTGA
CC_OL_003_D01	CC1G_05545																				8		GTGAACAAGTTGGCTGCTAATTTGACGAATCAGGTCCGGTCTATCGCTAAAGTCACGAAAGCCGTCGCGT
CC_OL_003_D02																					0		TGTCCTCGCGAAATCCCTCCTGAACGTTGAGCATATTACGACCGTTCTCCACAAATGCGCCATGTCCCTT
CC_OL_003_D03	CC1G_15755		+										+								0		TGTCATCGTTGAAACTGTCTACGTCATGTAACGCCAACCGTGGCCCATCCTCCATCCCGTCTTTTTTCAC
CC_OL_003_D04	CC1G_15757																				0		TTTGGGATACGCGCTCGTTCAATGACCCAGACCTTTGGCCAGAAGACGGCAGTCAACCTTTCGTTTTCAG
CC_OL_003_D05	CC1G_05556																				8		AAATGGTCAACCTTTCGTTTTCAGTATGGGCGATCCCACCGGTTATGGACAACACGCCGATTATGTCTTC
CC_OL_003_D06	CC1G_15758																						GCTGTTCAAGGGCTTGTGGAAGCGAGCCCATATCCTAAAATTCTGCTGGTTTATTGCCGGTCCGCATATC
CC_OL_003_D07	CC1G_15758																				0		AAAGCGAAGACATTATTGCATGGCTTCTCCTTACGTTTGGTCTGTTTGCCGGTGCGCCAAGGGGGAAGAT
CC_OL_003_D08	CC1G_05559																				0		ATTCAATGGCGTCCCTTCGTACTGCAAGACTCTAACCGTCCAGCCCGATTCGGAGATTAACAAATGCACC
CC_OL_003_D09	CC1G_05560																						TCCCTGCTGTCTGCATCACAGGAGGCCTCTACCTCTCCCCTCAAGCCGGGCAAATCATCAACCCCCGCCA
CC_OL_003_D10	CC1G_15759																				0		GGGCAGGAGTATCAAACTCTTCTCGGAGTTCCTGTAACGGTTTCGAAGCGGGATGGCAACCTCTATATCA
CC_OL_003_D11	CC1G_15759		+		+																0		AAAACGTTTTATACAACTCACTGAGACGCGGCCAACCACTTGGCCAATGGACCTTCTTCCCCGAACCTGT
CC_OL_003_D12	CC1G_15759																						TAGAACTCCCCGCTGAACTCGAACCGTGGTTCATGTTTTCGGTCTTTGGAAAACACGTCACCTCACACGA
CC_OL_003_D13	CC1G_05567																				0		ATATTCTTCCAAGAGGCCTGTGGATACTTGCAGGAGTTTTTCGCAGTCTTCAGCGGGGTGGTCCACATCA
CC_OL_003_D14	CC1G_05572																				0		AGAAGTCTCTATGCGACCGTGGCTGGAGAACAAGGAAAACAACGCTGGCGCTCGCTTGGTAATGCAAACT
CC_OL_003_D15	CC1G_05573																				0		GAGGGTGTGAAGCATGCTATCAAGGTCCCGGTTGGCAATGCGAATGCGACTGAGGTCATCGCCGAACATT
CC_OL_003_D16	CC1G_05574																						GCAGTCACGGAAGAGGATAGAATAAAGAACTGGGACGGGATAAATTACTGGTTTGTTATGGAGGCCATGC
CC_OL_003_D17	CC1G_05576																				0		AATCCAGCCTGTGTCCCTGTCCGGACTTAAAACGCTTCAGCTTGAAGGCAATCTTCCTGGGGTTTCGTTT
CC_OL_003_D18	CC1G_05577		+													YLR178C	TFS1	Carboxypeptidase Y inhibitor, function requires acetylation by the NatB N-terminal acetyltransferase; phosphatidylethanolamine-binding protein involved in protein kinase A signaling pathway			0		AGGCCGATCTCGATAGCAGGCCCAAGTGGAATGCCATGAAGTTCGCTGAGAAGTATGGGTTGAAGCTTGT
CC_OL_003_D19	CC1G_05578															YDL090C	RAM1	Beta subunit of the CAAX farnesyltransferase (FTase) that prenylates the a-factor mating pheromone and Ras proteins; required for the membrane localization of Ras proteins and a-factor; homolog of the mammalian FTase beta subunit					ATGGAAAACGCAAGACGGATCTTGGGCTCAAAGAGGAAGTAGCCGAATTGGACGACCGAGTACGAAAGGA
CC_OL_003_D20	CC1G_05581																						GGCGCGACGAACCGATTACCGTCAATCTGGCAGATTTCCCTATTCGAGTCATGAAGGCCAAAGGTATCAA
CC_OL_003_D21	CC1G_15763																				0		GTCCTAGTCCTGGGTATGGGTATAAAGGGCTTGTTGATTCTATCGGACGCGGTACGTTCACGGTTTTGTC
CC_OL_003_D22	CC1G_15763																				0		TTTTGGAGCTTGCGGCGATGGTTCGAGTCCTGATGCGACAAATGCTACTGCTAATAGTCCTTTGGGTGCA
CC_OL_003_D23	CC1G_05589		+																		0		CAGCGGGCCCATCGAAGGAATGGACATACTCGTTACCGGCGGAAATTATTCAAACGGTGTATTGGTAACA
CC_OL_003_D24	CC1G_05591																				0		AAGGTCAGTCAAATTCCAGGAAGTACAACCGGAAGGGGAAGGGTAAGGCTGCTGTCAGCCAGGTGGACAC
CC_OL_003_E01	CC1G_05598																				6		TCGCCAAATTTTTCGTTGGGCAATTTCTCGATGGGCGATTTCTCGGCGCGCAGTATGGAAGACGACATGT
CC_OL_003_E02	CC1G_05603										+										5		AAGAGTACGCCGGGCACTCCAGCTCTGACTGTTGTCGGCATTATTCTCGATGAAACTTGCGAACGAATTC
CC_OL_003_E03	CC1G_05604												+								0		GGGTCCCTTGTTTAGCGGAGAACCTGAACCTTTGTGGATCCTCGAGAAGTTATGCACCTTGTTGGAGGAA
CC_OL_003_E04	CC1G_05605																				0		CAGCCTCCTATGCAACCCGCTCCTGTGATGCAGATGATGCAGCCCACCCAAATGGCGCCGTCGGCGATGT
CC_OL_003_E05	CC1G_05611	+																			0		ACCTCAAGGTACTCAAGATTTCGGCTACGATGTTCGGCAGGATTTGGGATGTGCGATTGCCAACCCAGTT
CC_OL_003_E06	CC1G_05614																				0		CTCCTGGGCCGCCAGTTGGGATTATTGAAGTCGCTGATGGATCCCCCTTTGCAGCACAATATGAATGCAT
CC_OL_003_E07	CC1G_05617		+																		0		GATGAAAGGATACGCTGCGAATATCGAGAAGGAGCTGGTGGCTTTGACTCTGGCGTTGAAGGATACGCTT
CC_OL_003_E08	CC1G_05619															YLR208W	SEC13	Component of both the Nup84 nuclear pore sub-complex and of the COPII complex (Sar1p, Sec13p, Sec16p, Sec23p, Sec24p, Sec31p, Sfb2p, and Sfb3p) which is important for the formation of ER to Golgi transport vesicles					TACTGCCTCAGTCAACTCGGTTTCTTGGGCACCTCATGAATTGGGGGCTATCCTCGCATGCGCATCATCA
CC_OL_003_E09	CC1G_05620																				0		GGCGGGGTTGAATGGGTTTGTGTTTGGGATTAAGAGTAGGATTCCTATTCGCTTGACTCGGCGACGTTAG
CC_OL_003_E10	CC1G_05629								+														CGTCTAATTTCTCCCCGCTTCTCATGATCCTGATGAGAGATGGCTCCCTCTACTTCTTCGCAATATTTGC
CC_OL_003_E11	CC1G_05631																				0		AACTCATTCTGGACATCTTTTCAAGAGTCCTCCAGCCCGAACAACGCGCCAAATGGACTAGCTACTCTCC
CC_OL_003_E12	CC1G_05634																				0		AGCCGAGAAGCCAATATGACTCCAGCCCTCATCCGAGGAACGAACCCTCGTCGCGAAACCAGTTCGAGTA
CC_OL_003_E13	CC1G_05647	+																					TTACTCGACGTTTTCTCCTTTGTCCTTGTGGGTACCCGCCTCTATACCTATCTCTGCAATTTCGACCTCG
CC_OL_003_E14	CC1G_05650															YDL161W	ENT1	Epsin-like protein involved in endocytosis and actin patch assembly and functionally redundant with Ent2p; binds clathrin via a clathrin-binding domain motif at C-terminus					ATCTGTTTGCGAATCGGGACGATGGGCAGGATACCTTTGGAAACGTTGGTGCTCTGAGGTATGGGTATAC
CC_OL_003_E15	CC1G_05651		+																				GGTCGGGCGCCATCCTATTGGCACACGAACTGAATAACTTCACCATGTCAGAAGCAGTGAAATATTATCA
CC_OL_003_E16	CC1G_05652		+				+																TAGAGTTCGTCGACTACGATTTGTTGGAGTACACCAAGGCCCGTCCGGGAGAAAGGATACGCGTTTTGAG
CC_OL_003_E17																							TCTGTGTTGGATGCGGCGTTGGAGCTGGGGATTGGAAACAACTCGCTGGTAACAGCCTGGATGTTTGATA
CC_OL_003_E18	CC1G_05654																				0		GCAAAGCCGCATTCGAAGATGATCGCGAGAACATTCAAGTTTGTGCTACTACTGGTTCCAGCAAGCGGAC
CC_OL_003_E19																					4		GCTTACAACCATAACATGTTCAATGGCGGCAACGGCTTTCCCAACGCTCAGACTGGTTTCAACCTCCAAA
CC_OL_003_E20	CC1G_05656																				0		TTCTGCAACCCCAAGTACTAACTACTTCCCTGCAGTAGGCCTCTTTCTCCAGGACATTCGTGGCTTCGAG
CC_OL_003_E21	CC1G_05657																				0		ATAAGACCTGGGCAGCCGCCTGAAGTGATTAAGAAGCTGGAAGTAAAGAATAAAGGATCTAGCTCTAAAC
CC_OL_003_E22	CC1G_13099																				0		CTGCGCAAGTTCAAGGAGCTCAACGATTACATTATGAATAACTTTGAGGAGATCTCAAAGCGAGGCTCGT
CC_OL_003_E23	CC1G_13095																						TGAACAATCCCCGTATGCGTCTATAAACGTTCCGCTAATCCAATCGCCTAGTCTGCGGGTACCCAAGCAA
CC_OL_003_E24	CC1G_13096																						GACGCACCAGACTCGATAGATGAAGCTGAGGAAAGGTTGAAGAAGGAGTATGGTGTTGATATCGACACCC
CC_OL_003_F01	CC1G_13098																						CTCGCACGATGCTTACTTTCGTGCTCGCGAGGACACGGCGATTCAACTTCCTCGACAGAATGAATGTTAC
CC_OL_003_F02	CC1G_12238															YDR121W	DPB4	Shared subunit of DNA polymerase (II) epsilon and of ISW2/yCHRAC chromatin accessibility complex; involved in both chromosomal DNA replication and in inheritance of telomeric silencing			0		GTGAAAGGTTCGACGGTGTTTATCAATTACCTTGCTGCGACTGCACACGATATCGCTATTGCGAAACAAC
CC_OL_003_F03	CC1G_12237																				0		ACCTGCAGAATCAATCGCAGCCTGTCCCGCCGCACGTTGTCTCGACGCCATTCTCTACGTCGTCGATCAT
CC_OL_003_F04	CC1G_12236																				0		TTGTCTATTGCGCAGGAGCGTGGGCGCTCGAGTGTTGTGGCACTGTTAACTAGATTCATTCAGAACCGAT
CC_OL_003_F05	CC1G_12235															YLR069C	MEF1	Mitochondrial elongation factor involved in translational elongation			0		GTGGATCTACCCAGGGCAAGGGAGAGTTTAGCATGGAATACAAGCATCATGCACCAGTACTCCCCAATGT
CC_OL_003_F06	CC1G_12234															YBR079C	RPG1	Subunit of the core complex of translation initiation factor 3(eIF3), essential for translation; part of a subcomplex (Prt1p-Rpg1p-Nip1p) that stimulates binding of mRNA and tRNA(i)Met to ribosomes			0		TTATCGAGTTGTGCGTTGAGATGCGCAAGGGGAGGACTGCAAAGGAGGGACTGATGCAGTACAAGAACAT
CC_OL_003_F07	CC1G_12231															YGR217W	CCH1	Voltage-gated high-affinity calcium channel involved in calcium influx in response to some environmental stresses as well as exposure to mating pheromones; interacts and co-localizes with Mid1p, suggesting Cch1p and Mid1p function together			9		GTTATCTTGGTCGTACCGCGTATGAAGCCTTTACTGCTCGCAGTCTTTGGCAACATGTATGGTCTCGTCA
CC_OL_003_F08	CC1G_12233																				0		CCCACCTACGCATCATCCGACACCCGCCCATTCTACATGCCCGCTAAGACAATTATAATGTACTTCCCTT
CC_OL_003_F09	CC1G_12244																				0		TCTTCTTCGCCTTTCTACAGATCTCCACCATCGTCGCTGTTGCCCTCGCTGCCGTCGCTGCCGCCTCCCC
CC_OL_003_F10	CC1G_07994																				0		GCAAAAGTCTATCCCGGAACTGGGGATCCTAAACCTGAAGACTACGCAGCAGAAGACTCGGATGCTAGTT
CC_OL_003_F11	CC1G_07992														+	YGR125W		Putative protein of unknown function; deletion mutant has decreased rapamycin resistance but normal wormannin resistance; green fluorescent protein (GFP)-fusion protein localizes to the vacuole			0		GATGCGGAAAGGAATTGTACGGTTGTGGTGGAGAGTGCGGCTGTGCTTTGGAAGATGAGCATGAGAGATT
CC_OL_003_F12	CC1G_07990																				0		AGGTATCCGCAACTACGTCTACTCCATGAACACCACTGTCAACCCATCCGTCTACAAGACCCTCGATAAG
CC_OL_003_F13	CC1G_07989																				0		CGCCGATTCGCACACCCTAATCCAGCAATCAAACCCGTCTTCAGTTGTGTACCATAACTCCTTCTTGGAG
CC_OL_003_F14	CC1G_07987																				4		TCTTATCCTTGTACACGGACGGGTGTTACCTGATGCGGACCTCCGGTCTTATCTCAAAGCTCTTCACCTC
CC_OL_003_F15	CC1G_07981																				3		TTGTTGTCCAGCGCGGAATCTTGGTGACTACGATCCAGGTTCTATTGTTGGTTTCGTTCTACGCTGCTCC
CC_OL_003_F16	CC1G_07980																				3		CCTCTGCGCGAGCCGCCCATGGGCGAGCCTGCCTCACCTGCGTGGATGCCGGAGAAGACTGAAGCTGAGC
CC_OL_003_F17	CC1G_07973																				0		CCCACTGCCAAGTCTGCAACCCCAAATCCGAACCTTCAGTCACAGTCCTACAATCTTCTTTATCGAGTGG
CC_OL_003_F18	CC1G_07972																				0		AGTAGCGGCACGAAACATCATTAGATTGATCAAGCGGAGTGAGGCAAAGGCCGGTGGTAACAAGGAGGAA
CC_OL_003_F19	CC1G_07966																						GTCCCTGACTTCAATAAGATGTATGAATTGTACGATCCTTGCACTGTGATGTTCTTCTACCGGAATAAAC
CC_OL_003_F20	CC1G_07965																				5		ATCAAAGTCAACGAATTCCGTGATCTCCGTGCCAACCCTCGATGTCTCCTCGAAAGTCAGCTGCTCTCTT
CC_OL_003_F21	CC1G_07964																				0		CGCTAAGAAGGTCCATGATGAGATCAAGTACAGCAAGGAAGATGACCAGGCCATCGACGACTGGATTGCT
CC_OL_003_F22	CC1G_07962																						TGATCCCGCCGGCCGATTACCAGGAACGATTTGTCCATGCTTTGGAGGGATATTTTGTTGCTTGTCCAGA
CC_OL_003_F23	CC1G_07960																				2		TTGTATAACGACACGGCGCTTCAACATATTCTTCCCCGCCTGGACCGCTTAGCAAAGATCTCGGTCAATG
CC_OL_003_F24	CC1G_07957																				9		GATGCCATCGGTGATTTCTTCTTCTGGACTTGGAAGATTGGACCTACCCAAGCAGGCCGTGTCGAAACTC
CC_OL_003_G01	CC1G_07956																				0		CTCTACACGTTCGCTGACGATTCTCCTCGCCTCCCTACAGCTCTCCACCGTCGTCGTCTGTGCTCTTGCT
CC_OL_003_G02	CC1G_07954																				0		TACATCGTGGGTAGCATCCACTGGGGCTACGAGACTGAACTCTACTTCGGAACAAAGGGGGACGAGATTA
CC_OL_003_G03	CC1G_07949																				0		AGAGGTGGGACGGTCGATTGGTTTGAGTGCACGAAAAGTCCAGTACATTTTACTAATCTCCTGGCGATAG
CC_OL_003_G04	CC1G_07947												+								9		GCTGGAGAAGGCATCTGGAAACCTTTCCTCGAAATCACAGCCGACGATGTCCAACGGAGTTTAGACACAA
CC_OL_003_G05	CC1G_07940																				0		CTGGCCGTGCGTATTCCTTCTACCTTTATTTTACCAAGAGAGACCAACATTATTTGCCAGCTGTTGTGGC
CC_OL_003_G06	CC1G_07938																				0		TAAAAAGACTACCCACCTCTCAACACCCTTCCTCATCCACTAAAACCAAACGCCAACGGCAAGCAGTGCT
CC_OL_003_G07	CC1G_07937																				8		GCCGCGTTCGAGTGGCATATCTGGCATGATGAGGTGTACCCTGGGGTTTATCGGTATGTGGTTTTTCTGA
CC_OL_003_G08	CC1G_07939															YNL297C	MON2	Peripheral membrane protein with a role in endocytosis and vacuole integrity, interacts with Arl1p and localizes to the endosome; member of the Sec7p family of proteins			0		AAGAAAGTGATGCCTATGCTCGTGGAGTTGTTCATGCGGTTCAAGTCTGCGCCTCAGGTTTATGCGGATG
CC_OL_003_G09	CC1G_07941																				0		CTCGTCAAACCACCGAGGAACTACTTGCTGCTATCCCCCCTCAATGTCAGTCCAGCTGTGAAGATGCCAC
CC_OL_003_G10	CC1G_07944																						CGGTGATGCTCAATGTGGGCATTACCTTTAACCTCATCATTACGATCGCCAGCCGGGCAGGAAGAGAAAA
CC_OL_003_G11	CC1G_07945																				7		TGTTGCCACCAGCGCTCAACCAGTCGTGATAGTCCTTGCCGCTCTGAGTGCTGCCGCATTGCTTTTCTAG
CC_OL_003_G12	CC1G_07946																						GGTACCCCAATAAACCAAACCAGCATGGCTCGCCTGGTCACGGTGAACTCTGTTGATGACTTTTGTCTCT
CC_OL_003_G13	CC1G_07951																				0		GGAGTTTATGGATTATGAACCTGTCTCTGAGGACGAGGATATGGAGGTAGACGAGAAGGATTGGGAACCC
CC_OL_003_G14	CC1G_07953																				2		GGCCTGTGCCTACGAACTTGGTTCGTGATTGGGCTGCGTATGAGAAATATGTGCCAAAGGTTAAGACTGG
CC_OL_003_G15	CC1G_07955															YDL116W	NUP84	Subunit of the nuclear pore complex (NPC), forms a subcomplex with Nup85p, Nup120p, Nup145p-C, Sec13p, and Seh1p that plays a role in nuclear mRNA export and NPC biogenesis			0		GCCTGGGATGAGTAAGGATGCGAAGGGGGTGTGGGTTAATGAGTATAGGAATCTCATCGATACGGTGTAC
CC_OL_003_G16	CC1G_07958																				0		CCCCTCGGTGCGCTCATGATGGTCATCCAATTCTTGAGCGTCCGGAATCAACTTTATGTTCACGTTTTCG
CC_OL_003_G17	CC1G_07959																				0		AATTGCCGACATGGAATTCTGGCGCAGCCCCGCCTATATGGACTTTTTCAACTACCTCGACTCCAAAGGT
CC_OL_003_G18	CC1G_07963																				3		TGGCAAACTCAGGCCCCAATACCAATGGCTGCCAATTCTTCATTACCACCGCCAAATGCGACTTCTTGGA
CC_OL_003_G19	CC1G_07967															YFR038W	IRC5	Putative ATPase containing the DEAD/H helicase-related sequence motif; null mutant displays increased levels of spontaneous Rad52p foci			0		TTGAAGGGGAAAAGATAGAGGTTGTTCCGGACACTAAAGAGGGCAAGGCCAGAGTCCTGAGCGATGAAGA
CC_OL_003_G20	CC1G_07968																						ACGAATGGATGCCTACAGTGATTACACCGGGTTTTCGATTCCTCCCTGTGGGGAGTACGCCCCAAAAGCT
CC_OL_003_G21	CC1G_07969																				0		TAAAGCTCGAGATGCCCAAGTTGGTCGGAGGAGCACATAGCGAAAGACCCTCCAATAACGTCGACGATTT
CC_OL_003_G22	CC1G_07970															YNL082W	PMS1	ATP-binding protein required for mismatch repair in mitosis and meiosis; functions as a heterodimer with Mlh1p, binds double- and single-stranded DNA via its N-terminal domain, similar to E. coli MutL			0		AGGCGGCCGATTAAGGCTAACCGCACAACCCGTTAGCAAATCCACAGTGTTTGATATGAAAGGTGGGAGA
CC_OL_003_G23	CC1G_07971																				0		CCTAACGACGCTCCGACCGTGACGAAGTACTTCAGGGAACGCTTCAAGATCATACATGACATCCACTCAA
CC_OL_003_G24	CC1G_15778																						AACTTGTGCGATACACGCCTCAGGATGCCGCTGATATCTGTTTGTTGCTTCGCAATGGTACCATGCTCTC
CC_OL_003_H01	CC1G_07975																				7		CCACCCAAATGCGACAAGATTTCGGACGAGTTGGCTGCTTTAGGATATTATGCTCGCAGCTTGAAGCCAG
CC_OL_003_H02	CC1G_07979														+	YML094W	GIM5	Subunit of the heterohexameric cochaperone prefoldin complex which binds specifically to cytosolic chaperonin and transfers target proteins to it			4		GCGAGAGCAGGCACAGAAATACTACGAGGCAAAGATCGACTATCTCCAGACGAACTTGGTGAAACTGGAA
CC_OL_003_H03	CC1G_07982																				0		CGAATGCTTATGGAGTTGTGTTGGATCTTGGCGCGGGTCATGGACACACCGTCCGGTACCTTGACCGAGA
CC_OL_003_H04	CC1G_07984															YKL004W	AUR1	Phosphatidylinositol:ceramide phosphoinositol transferase (IPC synthase), required for sphingolipid synthesis; can mutate to confer aureobasidin A resistance			0		GAAGCAACAGGAGAAAGGCCATAGACATACCGCCAGCATTGCGAGTCTTATTAGAAGCGATGAGAGGGGT
CC_OL_003_H05	CC1G_07985																				7		ACAAGAGAAGATGGCGAGGTTGTTGTTGACGTTCCCGTGGGATAGGAAGGGGTTTTATGAGTCCGCTTGA
CC_OL_003_H06	CC1G_07988															YFL011W	HXT10	Putative hexose transporter, expressed at low levels and expression is repressed by glucose			0		TATCGCCGACTCGTTCGTGAGTCAGATCATCCTCGGAGCTGTGAATTTTGGGTGTACATTCGGAGGTCTT
CC_OL_003_H07	CC1G_07991																				6		AGTCCTCACTGAGGTCAAACTGCGCGAGAACGAGTATAAACTGATCCAGACCCTGGCCTCTCAGATATCT
CC_OL_003_H08	CC1G_07993																				0		CTTATATCCCTTGTCCAACTTTACCTTCAGCACGAAGGAAGCCCAACCCGAAGAAGACCCCTCCGTCTCA
CC_OL_003_H09	CC1G_04816																				0		CCTTTGTCTGCGTACCTATCAAGAACAGTCAGTATCGCTTCTTAACCGCGCTCAGGGCAATCGCTCACAT
CC_OL_003_H10	CC1G_04814																				0		ATTGCGAGTTCTTATTCTTGATGTGAGTTACACAGCCTCTAACGCTGACGATCCGTGGCTTGCGCCTGTG
CC_OL_003_H11	CC1G_04812																				0		TCTGTTTAAGAGAAGATCTCAACCGTATGACGCATCTGATACGTCGGACCCCACTGCGAAGCATCCCGTT
CC_OL_003_H12	CC1G_04807		+		+								+								7		GAGGTTGAAACGGGATGCCATTGCCACGCCGGAATCAAGTAGCAGTACTACAACCAGCGAAAACACAAAC
CC_OL_003_H13	CC1G_04806																				1		AGTGGCGTGGGTGGAGAGCTTAGAGGTGAAGGACACCAGAGCAGGATTGATCACTATTGCCAGTATGACA
CC_OL_003_H14	CC1G_04801	+																			9		CGAACGGCAACTGCAGAGGTTCACCGAAAACGAAGAATATATCGCTAGTGCTCGTGCTCCTATTCGCATC
CC_OL_003_H15	CC1G_04796														+								TATGGCAGATGTTTGAATTCGACAGGGATGACTTTGTGAGGGAATATTGGACTTGTGTACCACTTGGCGA
CC_OL_003_H16	CC1G_04786																						CAGAGCTCTGTCCCAGGCGGTGAAAGATACGGTAACGACTAATGTGGAGGTTTACGACGAAGACAAGTGT
CC_OL_003_H17	CC1G_04785																				7		GGGCAGGCTGTACGCATTCTATGGCATCCTGGTCATCCTTGGGACAGTTACACTCGTCCTTCTTATCAAG
CC_OL_003_H18	CC1G_04783	+											+		+						0		TGATGGGTACCAGCATGATGGGGGCGAGGAACATGAAGTATTATTCGGCCAGTTCAGATTCGAGCTTCGA
CC_OL_003_H19	CC1G_04780																				0		TTCACGGACGAAATAACGGATACTCATGCCCACACGTAGATCCCCAGAAAGCGCTTCACCTGACCAGAAA
CC_OL_003_H20	CC1G_04779																				0		GGGAAAAATACCTCATGGAAGGGCTTTCTGGACTGACTCGGGAAACCTCACCATTCAAAGTTGGAGGCAC
CC_OL_003_H21	CC1G_04775																				0		TCTCCTTGACGCCAATAAGCAATCACTCGAACATCTATGCCTTTACCCTCGAACCGGGTTTGGGGCCTAT
CC_OL_003_H22	CC1G_15798																				0		ACACAGGTCCCGACTCGCTCTCCCTTGTTCGCAATATCCGGGGGCTACAAGTTCCCATTACCGAAATAGA
CC_OL_003_H23	CC1G_15797																						ACCGCACCGAACAGGGTCACTGGGGAATCCGGGGTAGGAAAAACAGTTTGGGTTGACCGATACGACGCTC
CC_OL_003_H24	CC1G_15795																				0		GAAGAGATGATCTCACCGTCCGAACTTCCTCCCCATTTACAGCAACACTACAATCCTGAAACGGGACTGG
CC_OL_003_I01	CC1G_04767															YML015C	TAF11	TFIID subunit (40 kDa), involved in RNA polymerase II transcription initiation, similar to histone H3 with atypical histone fold motif of Spt3-like transcription factors					AAAGGTCATTCAACAGACGCTAGGACAGCAGGTGTCGCAGCCTGTAGCACAGATAATCGCTGGTTTCTCA
CC_OL_003_I02	CC1G_04766																				0		TATGGGCGAAGCGCTACGGCTGGCGTGCCCTCTCACCTATGGAGTCCCAATCCTACTTTATCTTTTGGTC
CC_OL_003_I03	CC1G_04765															YPL170W	DAP1	Heme-binding protein involved in regulation of cytochrome P450 protein Erg11p; damage response protein, related to mammalian membrane progesterone receptors; mutations lead to defects in telomeres, mitochondria, and sterol synthesis					ATTTCTATGGACCAAATGGAATGTATGGCAACTTCGCTGGAAGGGATGCGTCGAGAGGCATGGCGAAGCA
CC_OL_003_I04	CC1G_04764														+	YJL130C	URA2	Bifunctional carbamoylphosphate synthetase (CPSase)-aspartate transcarbamylase (ATCase), catalyzes the first two enzymatic steps in the de novo biosynthesis of pyrimidines; both activities are subject to feedback inhibition by UTP			3		GAGGACATGATTGTAATGCACCCATTGCCTCGGGTTAACGAAATCGACCCCGAAGTCGACTTTGATTCCC
CC_OL_003_I05	CC1G_04763								+												0		CCTGTGAAAGGGTTCATTACCTGCCTCCAAAGAGGAAGTTTGGGTCTTATTTACATCGCAAGCGCCGCCT
CC_OL_003_I06	CC1G_04762																				0		ATAACTTCGATAGGGCGTTCGACATGCTGAGACCAGTCATTCAAGGCACGGCAGACGTAGGAAAGAAGCT
CC_OL_003_I07	CC1G_04756																				8		TTTCCTCGCAATGTGTGATAGTCGCGGCCATCGGCATGATCGTGAAGCATGAGTCTTTTGTCATTCCAGC
CC_OL_003_I08	CC1G_04755																				0		CGGTGTTCTGGATTCAACCGTCGAAGTTTATCGGCTCCACCTCACCATGGCATCGAAGACAAACTATTTC
CC_OL_003_I09	CC1G_04749																				5		TGCCTGAGACGGTTGTCAATGCGAAGATGCCAGGGGTGTATTCTCATTTGCCTGGGCCATACTTTAGGAT
CC_OL_003_I10	CC1G_04748															YJR117W	STE24	Highly conserved zinc metalloprotease that functions in two steps of a-factor maturation, C-terminal CAAX proteolysis and the first step of N-terminal proteolytic processing; contains multiple transmembrane spans					GAAGATCTTCGAGTGGGCAGGCGACAGGTTTGTTCCGTGGTTGATGGCGTTCATGATTACCTTCCAATTG
CC_OL_003_I11	CC1G_04745															YDR489W	SLD5	Subunit of the GINS complex (Sld5p, Psf1p, Psf2p, Psf3p), which is localized to DNA replication origins and implicated in assembly of the DNA replication machinery			0		GTCCAGATTTTGAGAGACGACCCACGTACCTCTGAATCTGAGCACTTTCGGATTATGCTAGTACAGACTG
CC_OL_003_I12	CC1G_04743		+													YFL037W	TUB2	Beta-tubulin; associates with alpha-tubulin (Tub1p and Tub3p) to form tubulin dimer, which polymerizes to form microtubules			0	beta1 tubulin	ATGTCCGGTATCACCACTTGCTTGCGATTCCCTGGTCAACTCAACTCCGACTTGAGGAAGCTCGCTGTCA
CC_OL_003_I13	CC1G_04742																				0		TGGTCTGCAGGAGCTTGGAATATCGATGCGCCCGTTTGTTTCCATTCCTCACGTCTCTCAACTTCGTTAG
CC_OL_003_I14	CC1G_04738											+				YGR060W	ERG25	C-4 methyl sterol oxidase, catalyzes the first of three steps required to remove two C-4 methyl groups from an intermediate in ergosterol biosynthesis; mutants accumulate the sterol intermediate 4,4-dimethylzymosterol			0		TTGTTCTCTCATTTCACCATTGAATTGCCCTTGATCTGGTTGTTCCACCCCACCGCTGAGGCTCTCGGAA
CC_OL_003_I15	CC1G_04737												+		+						0		AACATTGTCCCTCACTCCAAACGATCATTCTACCTAGAGGCAAAGTGTGGTTCCAAGCACCAGCTGCGTC
CC_OL_003_I16	CC1G_04735																				0		CGTCACCTTGGCGCACTTGAGGGAGATGGAGCTCACAGGCCTCCGTTACCTGAGTATACTCTTATTATAT
CC_OL_003_I17	CC1G_04733																				0		AGATCGTCCAAGTGCGCTTGAAGCAAGAGTCAAAGGCGACGGAGGAAGCAGTGGGGAAAATGAAGACGTT
CC_OL_003_I18	CC1G_04729																				0		AACGTCGAGACCGTCCTCCGAGACTACTTGATGTTGGATATGATATGCCAGGCGGAGTCCACTGCATCCC
CC_OL_003_I19	CC1G_04728																				0		GAAGCTGGGCCTTCCCGAGAACCCTATAACACACGGCATAAAGGGTCGAAGCATGTTGCAACAATCTCAG
CC_OL_003_I20	CC1G_04725														+								ATTACGCGGAGCTTTTCCTCGCTCATTCGGTCACTTCTGCTTTGTTCCTTGCACCATGGGTCGCCCATGT
CC_OL_003_I21	CC1G_04724																				0		TATGAACAAGGAGCTATTCACATTGAGCACAGGCGCGACGCTATCCCGGTACACGACCAAAAGAGTGAGA
CC_OL_003_I22	CC1G_04722																						GGCCTGGTACACATGTTTCCGTCCCGGTGTCAATGCCCGCGATTCCAGCCGTACCGGACGACCTCTTCAC
CC_OL_003_I23	CC1G_04713																				0		CACAGTTTCGAGATCTTCCTCGCTTGCACTGTCGTTTTCCCTGGTCTGGGTAACGTTGGATATACCCTAC
CC_OL_003_I24	CC1G_04711															YEL007W		Putative protein with sequence similarity to S. pombe gti1+ (gluconate transport inducer 1)			0		GTGACACAAGCTCAAGCTGCTCAGCAGAACCATACCGCTCATCCACCTCATAATACACATTCGCCGCATA
CC_OL_003_J01	CC1G_04709																				0		TTCGAATACGTGCAAGCATACCCGCATATCAACCGTCTCCCTATTATCCGAGGAATCGCCAACGGGTTGC
CC_OL_003_J02	CC1G_04706																				0		AATGAATTCAGCGCGAGAATCAATGACACGCTGCGAAGAAGTAGAACACCTGTAACGGCCGTCCTTGGGA
CC_OL_003_J03	CC1G_04702																				0		AACCCTGCAGATATTCCTTCAGATGAGGACTCGGAGGGTCAAGAAAAACGTTTCCTTAGCGGCTTTGGCA
CC_OL_003_J04	CC1G_04701	+																			3		AGAAAAGACCGAGGCTGAACGCCAAGCGTTCATTGCTCACATGCGAAAAGCCGAGCTCAAATGGGCACGC
CC_OL_003_J05	CC1G_04698																						TTTTGGAGAGCCCGTCCAGGGGAGGTGAATTCCACTGTAACAGACATTACTGGTTCGTCTTTGCGACTTC
CC_OL_003_J06	CC1G_04699															YLR303W	MET17	Methionine and cysteine synthase (O-acetyl homoserine-O-acetyl serine sulfhydrylase), required for sulfur amino acid synthesis			3		GGTGCTACGCCCGCAGCCAAGGTCTCAAAACGCACCTCGATCATCAAGAGAGTCAAGAAACTCTTTGATT
CC_OL_003_J07	CC1G_04700																				0		GTCTCTGATACGGTCATTGGCAGAGCGAGGTGTGGACCTGCGGATTCTTCAAAGGGGAAAAGGATTGTAA
CC_OL_003_J08	CC1G_15783																				0		GGAATGGTCTGGCGCTGAGTGTTTGGATGGGAACATTTTTATTCGGACTGCGGAATTGACCGCGAAACGA
CC_OL_003_J09	CC1G_15784																				0		CGCTTGACTTCCAGCTCAAACACCTTATCTTGGATATACTACCCCACCTTCCACCGACAGTACATCGTCG
CC_OL_003_J10	CC1G_15784																						GCTCGCCTGCTCGTCATGATTCACTTTTTCTTCAACCTTATCCTGTATCCCAACCCGCTTTCGTCTACGG
CC_OL_003_J11	CC1G_04708															YER006W	NUG1	GTPase that associates with nuclear 60S pre-ribosomes, required for export of 60S ribosomal subunits from the nucleus			0		TATCACGCTAAACCGGACGATCATGTCCTGCAAAGAATGGGCAAGAGCAATCCGCTGAACCGGAAAGCTT
CC_OL_003_J12	CC1G_04712	+														YOR008C	SLG1	Sensor-transducer of the stress-activated PKC1-MPK1 kinase pathway involved in maintenance of cell wall integrity; involved in organization of the actin cytoskeleton; secretory pathway Wsc1p is required for the arrest of secretion response			2		CGGGTACCCGGCTTCTGCTACTGAGTTCGGATATGAGTGCTACTGTGGCGATCCCTCCGATGTTGACGAG
CC_OL_003_J13	CC1G_04714																						GGGCACGGAACGAGTGGATGCCAACCTGGCAAGATGTCGAGAAGAGGTCTATGATCATTGACTCTGTCAA
CC_OL_003_J14																							TTCATCAATCAGTTCCGAAAATACTTCTGCCTACTCCCAAACAAGGAAACCGCAAAGAAGCAACTCAAGC
CC_OL_003_J15																							CACCATCGAAGAACTGGAACACATGACTAAAATCGTTCTCAAGAAACTCAGGGACAACGACCTATTCCTC
CC_OL_003_J16																							TCCCCTCACCCATTATGCAACGACCAACTCAACTTCGTATGCCAACTCCCCGGACCATCATCCAATATCA
CC_OL_003_J17	CC1G_04721																				0		CCGGACCATCACTTCTTCCTATTATCGAGGCGCACAGGGAATTATCCTAGTGTACGACGTTGCGAATCGA
CC_OL_003_J18	CC1G_15787	+																					GAATGTGACTGCGCGGAGAGAACCGAAGAGGAGTCATTCGATGGGTAGTAATACGTCTGCTACTGCTAGT
CC_OL_003_J19	CC1G_04730															YML028W	TSA1	Thioredoxin peroxidase, acts as both a ribosome-associated and free cytoplasmic antioxidant; self-associates to form a high-molecular weight chaperone complex under oxidative stress; deletion results in mutator phenotype			2		GGAAAATGGGTTGTTCTCTTCTTCTACCCTATGGATTTCACCTTCGTCTGCCCCACCGAAATCCTTGCTT
CC_OL_003_J20	CC1G_15788																				0		AGGGGAAAGGAAAGAGCACGAGAGAAATCCTCAAACGCATTGACTATGGCGGCAGTGCGACGCTTCTAAT
CC_OL_003_J21	CC1G_04734																						GAGCTGCGGTGGTTGCATGGTTTCTCTCAACAATGATCTCAATAACCGAGACGGTCAGGATTGTACCGCT
CC_OL_003_J22	CC1G_04736																				0		TTATCACCTTCCTCTACGTTGATATCCTCGATACCACCGGAACTCTATACTCCATGGCCAAATTCGCAGG
CC_OL_003_J23	CC1G_04740															YPR086W	SUA7	Transcription factor TFIIB, a general transcription factor required for transcription initiation and start site selection by RNA polymerase II			6		CCATTTATTTCTGCTGCATGCTTCTGGGACATACCAGGACCCTCAGGGAGATCAGCCAGGTGGCGGGTGT
CC_OL_003_J24	CC1G_04741																				0		AAGGATACTTGCCTAGTCAAAGGTGTGGACGAGGACAGATTCTGGCAGCTATTAGAACGGTGCTGGAGTC
CC_OL_003_K01	CC1G_04744															YER159C	BUR6	Subunit of a heterodimeric NC2 transcription regulator complex with Ncb2p; complex binds to TBP and can repress transcription by preventing preinitiation complex assembly or stimulate activated transcription; homologous to human NC2alpha			4		GCAAAGTCGCTCAAGCTACTCCAATCGTAATATCCAAAGCACTTGAACTGTTCCTCAACCTCATCATCGA
CC_OL_003_K02	CC1G_04746												+		+						0		CGCTTGGAGATTCATCGAACAGGAACATCGATCGCAAGTCCAAGGTACTACCGAACACCCATTACACCCT
CC_OL_003_K03	CC1G_04747												+										AATTCTACCCCGTCCTATCCTTCAATTATATCACGGCGGATTTCCTCTGCCTGTTGGCGCGTATCATGGG
CC_OL_003_K04	CC1G_04750															YCL038C	ATG22	Vacuolar integral membrane protein required for efflux of amino acids during autophagic body breakdown in the vacuole; null mutation causes a gradual loss of viability during starvation			0		TCATCCTCTTCGCGAGTCTGATACCCCTCTACGGATGCCTCGGCTTCTTCTTTGAAAACCAAAGTCCTTC
CC_OL_003_K05	CC1G_04751																						ACGCGATTTGGGATCCTGAGTATGGTGTTACTGTTGCCATTGCCAGGTTGGATCCGGCTGTGTATTGTGT
CC_OL_003_K06	CC1G_04752																				0		CACTCCAAAGCGGACTTGCGAAATTGACAAAGGTCAAGGTTGGGTTTGCTATTGATGGGCCCAAAGGTGG
CC_OL_003_K07	CC1G_04753																				7		ATCGTGGGCCAGTACGATTCACAACAAGTATAGAAGAGGTCCGAGTAGTGTGTGGGATCCTGTCTATGGG
CC_OL_003_K08	CC1G_04758															YLR403W	SFP1	Transcription factor that controls expression of many ribosome biogenesis genes in response to nutrients and stress, regulates G2/M transitions during mitotic cell cycle and DNA-damage response, involved in cell size modulation			0		TGCCCGAAGCCGAATTGCAACAAGTCGTATAAGCAGGCGAATGGGTTGAAGTACCACATGACCCATGGAA
CC_OL_003_K09	CC1G_04759																						TATTGCTGGAGCTATGTTCTTGGGGGAGCATCTACGAGTCTCACAACTCGTCGCTGGAGTGTTCAGTTTG
CC_OL_003_K10	CC1G_15793																						TACATTCAAACGTACCCCTGAGCCAGTGCAAGAAGAGCGTCAGGAACGAACTGAAGACCATCACGAACCT
CC_OL_003_K11	CC1G_04761														+	YGL159W		Putative protein of unknown function; deletion mutant has no detectable phenotype			0		GGACGCATATTGTTCTGGTGGGGAGTTATACCCCGGAGATGAAGGAGGTTGAAGGGAGGATGGTTGAGAG
CC_OL_003_K12	CC1G_04770																				0		CAGCTGGATGAATTACTTCAGCCCAAGCCGAAGGAAACGTTGGAGGTCTTCTCAGAGGAAGAGAGCTCTT
CC_OL_003_K13	CC1G_04771																				0		GAACTCCAAGTAGTCGCCCCAGCAGCCGTTACGCAGAACCAGCTTCAGAAGGCCGATGTGCAGGCTATAA
CC_OL_003_K14	CC1G_04773																				3		GCCCTGGAATTCGGTGAATTGGAAACCCCATTTGAGTGAGGAGGCTCATGGGAAGGTGCTGGAGAAATTA
CC_OL_003_K15	CC1G_04774											+											GAGTCTTCACACACCCCAAGCAACCATTCCTCGCCCTTGGATTCATCCCCTCCGCCCTATTCCAAAGAAA
CC_OL_003_K16	CC1G_04776												+								0		AAGGGGAATATATTGCAGGAGGCATCTTGGTTGCGGCTCCCAACTCCGAACGGCAGAGGGTTCAGGTTAT
CC_OL_003_K17	CC1G_04778																				0		TTTCTGCGCCTTCGTGGAATCGAGGTTTTTACCTGATGAAGCGTTCGACCTGCCACCTACGGGAATTCAA
CC_OL_003_K18	CC1G_04781															YPR176C	BET2	Beta subunit of Type II geranylgeranyltransferase required for vesicular transport between the endoplasmic reticulum and the Golgi; provides a membrane attachment moiety to Rab-like proteins Ypt1p and Sec4p			0		ACACCCGTTTCCTGTATTGCGCGGTCTCGGCTTTGTCGCTACTTGGTCGATTAGATGAACTAGACAAGGA
CC_OL_003_K19	CC1G_04782															YBL071W					3		TACGACGAAATCGAGATCGAGGATATGGTCTGGGACGCTGAAAAGCGTGTATACCACTACCCATGTCCCT
CC_OL_003_K20	CC1G_04784																				0		CAACGCCAGAACCTCTTGCCAGCACTCAAATCACTGGAACTCACGATCGACTATAACGTCTGTGACACCT
CC_OL_003_K21	CC1G_04788																						GGTGCAATACAAGCCGTCCATCACTATCATCATCTGCGGAAAAAGACACCGTGCGGAATTCTTCTCGACC
CC_OL_003_K22	CC1G_04794															YNL045W		Leucyl aminopeptidase (leukotriene A4 hydrolase) with epoxide hydrolase activity, metalloenzyme containing one zinc atom; role in vivo is not defined; green fluorescent protein (GFP)-fusion protein localizes to the cytoplasm and nucleus			0		TTCGGGATTATGTCGATACGTTCATTGGGAAGAGCATCACGACCCAACAGTGGAAGGACCACCTGTATGG
CC_OL_003_K23	CC1G_04795															YNL121C	TOM70	Component (70 kDa) of the TOM (translocase of outer membrane) complex responsible for recognition and initial import steps for all mitochondrially directed proteins; acts as a receptor for incoming precursor proteins			0		TTTCCCACAAAGGAGCGAACCCCAGAACTACTACGGTGAACTCTTGCTTGATCAGCAGCGATACCAAGAC
CC_OL_003_K24	CC1G_04797																				0		TATCATCTTTGGTTTTGGTCGACGGTTCTGCCCAGGCCAACATGTAGCACTCGACTTTACGTTCCTGGTG
CC_OL_003_L01	CC1G_04798																				0		AGTGGACAAGTTAGCTCGAACGATTTGGTGCCCTTCCCAAAGGAAAAGGATAGGGAGAGCGGGAAGAGTA
CC_OL_003_L02	CC1G_04799																				0		GTCGCCGCAAGAGAAATCTACCAGAACACCAGCCTTTCCTACAATGTGACTACACAATCGAATGGCTCCC
CC_OL_003_L03	CC1G_04800																				0		TGTACAAATGGCTGGGTATTGAGGATAGGATTGGTATGGCAATTAGGGGCGGAGGACACTGCGATATGTC
CC_OL_003_L04	CC1G_04802																				0		TTCCCGACCTTAGCTTGGATCCGTTCGCTTGCGTCTATGGGGCGCTTACGCCTGGAACTTGCTTGTACTC
CC_OL_003_L05	CC1G_04803												+		+						0		ACTACGAGGGGTTGCGAAATTGTTTCCGTGGTCTTGCTGCACGTCTTGGTATCGAGTACGACGGTGTTTT
CC_OL_003_L06	CC1G_04804															YGL065C	ALG2	Mannosyltransferase that catalyzes two consecutive steps in the N-linked glycosylation pathway; alg2 mutants exhibit temperature-sensitive growth and abnormal accumulation of the lipid-linked oligosaccharide Man2GlcNAc2-PP-Dol			4	alg2	TACGACTCGTCTGACCCCGATGTTGCTTCGGTTATTTCAAATCGCCCGACCCTTATTTCTCTCAACCGCT
CC_OL_003_L07	CC1G_15801																				0		AGCAATGGCGGTCCGTCCAAGAAGAGGATGAGCGCACGCAAGATCAAAGATATCTGGCAAAATTCGAGTG
CC_OL_003_L08	CC1G_04810															YDR510W	SMT3	Ubiquitin-like protein of the SUMO family, conjugated to lysine residues of target proteins; regulates chromatid cohesion, chromosome segregation, APC-mediated proteolysis, DNA replication and septin ring dynamics; phosphorylated at Ser2				sumo	CTTGTATGATGGCTCCCGGATACAAGAAGATGACACGCCGGCATCACTAGATATGGAAGATAACGACACC
CC_OL_003_L09	CC1G_04811																				0		AAGTGGATCATACTTTTTCTCCACTCGCATTGGTGGCTTGGATAACGAACAGCCCTTCGTTGCGACGCTC
CC_OL_003_L10	CC1G_04813																				0		TAGAGATGTTGGACAGGATTACCCGGCAGCGGTTCGAGCAACGCAATAGTATTGGCACGTCACTTGACAT
CC_OL_003_L11	CC1G_04817																				0		AGTTCCCATATTCGACGCTCGCGACATCGACGGCTTCAATCTTAATAGTGTCCTGCCTGCATTGTCACTG
CC_OL_003_L12	CC1G_13466																				0		AGGGTAGTCGTTTGTTGCCGGTGGAGTACGCCGATTTAAAGCTGATAGATTGTATTGTGGCCGCGTATGC
CC_OL_003_L13	CC1G_12333																						GGATGCAATTATTCACTCTATCGATCCCAAAACCCATTCCCTCACCGTTCTAACCGAAGGTGGAACCGCC
CC_OL_003_L14	CC1G_12331																				0		GCTTCCGACTTCTCTCACTTTGGTGACGCTCATAAGAACTGGGAGAATACCGCGTATTCCATCCACGACT
CC_OL_003_L15	CC1G_12329																				0		ACATACCAACATATATTCGGTACCTCACCATTGTTTGCTCCTCCAACAGTGGCCAGTGGATCGCTCACGA
CC_OL_003_L16	CC1G_12330																				0		GCTCGACGCAAACTGACGACTTATCCCTATCCCCTTAATTCCACCTTTCCTGGCTTTGACAGCTTGAACC
CC_OL_003_L17	CC1G_12332																				0		CACATCAACCGCACATTCGACTATGAGCCTTTCTTCAAGGCATTCATCACCGCCCTCCACAATGAAGGTC
CC_OL_003_L18	CC1G_12335															YER169W	RPH1	JmjC domain-containing histone demethylase which can specifically demethylate H3K36 tri- and dimethyl modification states; transcriptional repressor of PHR1; Rph1p phosphorylation during DNA damage is under control of the MEC1-RAD53 pathway			0		TAATGTTGGAGGCTATCATGGAACGGGTGTGCAGGATAGTCGATTGCAGTGGCAAAGACCATATGAGGGG
CC_OL_003_L19	CC1G_15803																				0	nbs1	GACTAGGGCGAGAAAGGCCCCTGTGGTTTTGTTGGATGATTCGGATGATGATGCCGTTTTCAAGGGATTC
CC_OL_003_L20	CC1G_15805																				0		CACTGAGTGGTGGCACCACCTCGTTTACCGTTTCATCATGTTCACGATCGACTTCGCCTTCTACAAGAAC
CC_OL_003_L21	CC1G_12340																				0		ATCTTTCTGAAGCGGTTTTGACGCTTCTGGGCGTTCCGTTTAGGATTAGGAGGGTGCCTAGTATGACGGA
CC_OL_003_L22	CC1G_12490															YJL212C	OPT1	Proton-coupled oligopeptide transporter of the plasma membrane; also transports glutathione and phytochelatin; member of the OPT family					TGGAAGTAATTCCAACGTTATTCACGACCTCCATCCACGACCCTCGCTTCTCTGCCCGCTTTCGATGTAT
CC_OL_003_L23	CC1G_12489																				0		ACAATCCCTCTAAAATCCGCCGCCGTCAATTCGTCTACACCATTAAGCAGTGCCCTACCATCCTCCCTTC
CC_OL_003_L24	CC1G_12488																				0		ATCAAATGTTCATACATCATCCACGCTACCAATGGGTACGCCAACCACCTCCTCTCACCCGGCAAAACAG
CC_OL_003_M01	CC1G_12486		+													YGR216C	GPI1	Membrane protein involved in the synthesis of N-acetylglucosaminyl phosphatidylinositol (GlcNAc-PI), the first intermediate in the synthesis of glycosylphosphatidylinositol (GPI) anchors; human and mouse GPI1p are functional homologs			0		TCTACTCCAAAATGTTCATTTCCATCGTGCAACTATGGGGAGACCTGCTCGTGCACCACATCCTCCCACA
CC_OL_003_M02	CC1G_15806																				0		AATCCAAATAATGAGCGTAGACATCCTCCCAGCCTCCATCCCACTCGACGCATCAAAGCACTTCTCAAGC
CC_OL_003_M03	CC1G_12485															YDR060W	MAK21	Constituent of 66S pre-ribosomal particles, required for large (60S) ribosomal subunit biogenesis; involved in nuclear export of pre-ribosomes; required for maintenance of dsRNA virus; homolog of human CAATT-binding protein			1		GGAGAGGAGGGTGGAGGATGTTCCTGTTGACCAGCGCTTTTTCTATGAGTATTTCTCGAATAAGCAGGCG
CC_OL_003_M04	CC1G_12487																				4		TGACCCAGGTGCAGTTTGAAGGCAAATTGGTTGAGTTGGCGCTATGGGATACCGCGGGACAAGAGGAATA
CC_OL_003_M05	CC1G_12491														+	YFR031C	SMC2	Component of the condensin complex; essential SMC chromosomal ATPase family member that forms a complex with Smc4p to form the active ATPase; Smc2p/Smc4p complex binds DNA; required for clustering of tRNA genes at the nucleolus			0		GGCTTTGTACCAGGACGAGAGGAATGATGATGACGAAGATGGGCGTAATCGGAGGAGACCAAGAATTGGT
CC_OL_003_M06																							TAAGGAGGTCAATGAAGGAAAACCTGAGGGAGAGCGGCTCATGGTACACGAGATCCGGAAACTTGTTGAG
CC_OL_003_M07																							CACCCTCCGCATTCCAGCGATTCATGAACAATATCTTTGCGGACATGGTTGATGTCAGTGTCATCGTCTA
CC_OL_003_M08																							GACCAGAAGCGCTTACCTCCGCCAGACTTCAAGGAGATCATTGCCCAAGTTGGAACGGTTTCCTACACTC
CC_OL_003_M09																							GTCCGAAGAATCCGACACCCAGGAAACCGCAAAGGAGGAGGTCTCATCTGACACTCAACGCTCAGACATC
CC_OL_003_M10																							TGGTGATGCCATCCTGGAGCAGATCACTGACACCCAGTGCCTGAACCCAAAAAAGGAACCACCCTTACTC
CC_OL_003_M11	CC1G_12883																				0		AATACAAGTTCGGTAGCGCAAGAAATACGAAGCCCTGCCGAAGGTGGCGCGAGGTCCTGAGAGATATCGA
CC_OL_003_M12	CC1G_09057		+						+												0		GCTCGACCTGATTCGATTCTTTCTCTGCAGCACGAAGTTCATGTTACGAAACCCTTCCGTACGCGATCCA
CC_OL_003_M13	CC1G_15847																						ATCTTGAAGTACTCGCCTCCTACCATCGCTCTCAACCCTGACCATCCACTGACGACAAAACGCGGGTTCT
CC_OL_003_M14	CC1G_09067																				1		TACAGACGCTCAAGTTCATTTTCACGTGCGGGTTCTACTTTATGGTGGTTGACGTCACCCGTCCAACCGA
CC_OL_003_M15	CC1G_09082															YER178W	PDA1	E1 alpha subunit of the pyruvate dehydrogenase (PDH) complex, catalyzes the direct oxidative decarboxylation of pyruvate to acetyl-CoA; phosphorylated; regulated by glucose					CAAGTTGTGGAACTTGCCGTGTGTGTTTGTGTGTGAGAATAATAAGTATGGGATGGGCACGTCGGCGGAG
CC_OL_003_M16	CC1G_09089		+																				TCTGCAAGGAGCAGATGAAAAAATGGAACGAGGAGAACCCCGGTCGTGCGAAGGAGGCGATGACACAGAT
CC_OL_003_M17	CC1G_12394																				8		TAGCCACCAGATTGAGGATCGGATCTCGCAGTATGTCATCCAGCCTAAGAGTGCCGTCGCCTTTGCTGCG
CC_OL_003_M18	CC1G_10747																						GCGCTGGCTGTGTCCAATGGGTGCCATGGTTTCGAGATGAGGGGTCTCCACTAATTCCTGTAGTAAATTT
CC_OL_003_M19	CC1G_10730															YOR293W	RPS10A	Protein component of the small (40S) ribosomal subunit; nearly identical to Rps10Bp and has similarity to rat ribosomal protein S10					GCCGAGGTGCTCCCAGAGAGTAAAGGGCTTTGTCGATCATTGTATGTAGTAGCAAGGCTGCAATTCCACA
CC_OL_003_M20	CC1G_10750		+		+								+								7		ATGAGAAGAAGGTCCCCTTTGAGTTTGTTATGGTCGACCTCTTCAAGGGCGAGTCCAAGACGCCCGAATA
CC_OL_003_M21	CC1G_11898																						CACCGAGGAGGGATTCCACCACCGTTTCCGCAGAATGGAAGATTATAGAAACTGTATTGTACGGACAGCC
CC_OL_003_M22	CC1G_07821																				0		CCTGCCGAAGGTTCCCTTACGCTCGTTAATCAGATTTTCACAGGCCTCCAACAGATCCGTAGCTTTGCTA
CC_OL_003_M23	CC1G_14363																				0		CTCTCAGAGGCAGATGTCAAACGACTATGTGACAAGGCACGAGAAATCTTGATGGAGGAATCCAACGTTC
CC_OL_003_M24	CC1G_14364		+		+											YDL188C	PPH22	Catalytic subunit of protein phosphatase 2A, functionally redundant with Pph21p; methylated at C terminus; forms alternate complexes with several regulatory subunits; involved in signal transduction and regulation of mitosis					GGGATGCGAGTCATATGACGGCTAGTGAACAAGATGTTAAGGCTGATCGAGGAGAATTCAAGTAAGGGTG
CC_OL_003_N01	CC1G_07862		+																				TATCTCGACAAAGAGGAAGACGTAGCCATGTTCCGATGGGCGTACAAACACTTGAGGGAGATAGCTCGAC
CC_OL_003_N02	CC1G_07869															YIL034C	CAP2	Beta subunit of the capping protein (CP) heterodimer (Cap1p and Cap2p) which binds to the barbed ends of actin filaments preventing further polymerization; localized predominantly to cortical actin patches			0		TACACGTCTTCGAGACGGCTGAACGAGGCCGCCAAGCGCATTACAAGCTTACATCCACCATCATGCTCCA
CC_OL_003_N03	CC1G_11653		+																		0		TCCGGAGAATATTGCGAGAGCTGGGGACGATAAATTCGCACTAGCCTTTGCCCGTATCGAGAACCACTAC
CC_OL_003_N04	CC1G_11636															YDR012W	RPL4B	Protein component of the large (60S) ribosomal subunit, nearly identical to Rpl4Ap and has similarity to E. coli L4 and rat L4 ribosomal proteins					CTGCCCTGTATGACTGTGCTCTTCGATACTTCCATGTCCTATGTTCTATGCAGTGTATGTCCACCGTCGG
CC_OL_003_N05	CC1G_11187																				0		CCGGCGTCGGCACAACCGCCCTCCAGCTCCCCTTCGACTTCCGCTTCATCTGGGCCGGCGCAAAACTCAC
CC_OL_003_N06	CC1G_12370												+			YMR073C	IRC21	Putative protein of unknown function; proposed to be involved in resistance to carboplatin and cisplatin; shares similarity to a human cytochrome oxidoreductase; null mutant displays increased levels of spontaneous Rad52p foci					AGACATGATGCTAGATGCTTGCCTCGTCGGGTTCCTCGTTCCTGAACCGTCTTAGATGACAATATACCCC
CC_OL_003_N07	CC1G_13337																				0		CGATTTTGGTCAAGGGGTATGCGGTTCCTGGTGGGGAGGGTAGTAATGTGAAGGGGGTGGAGGTTACTGT
CC_OL_003_N08	CC1G_13461	+																					GACCCTCCGTAGACATTTAATTTCCACACGTTATAATCTCTCATATGCCCCAGGCTACGGCAATATGCTT
CC_OL_003_N09	CC1G_09208																						GGACCTGTCTGGAAGGTATTCTAGTTAGCTAGTATCGCTTCAGTATTGAGAAATTAAGCGACTTATCTGG
CC_OL_003_N10	CC1G_09241							+															GAACCCGCATTTGTTGGTCAACTCGGTTATTGCGCAGGTATCCAAGGCGGAGAATTAGCCTAGAACTGTC
CC_OL_003_N11	CC1G_09243										+												CCCCTTTTCCTCGCTCCGTACCCTTTCCCCGATTATGCTGTACGTTACAACTCTTTGCCAGCTTCACATT
CC_OL_003_N12	CC1G_05527		+																		6		TTAAGCCTAAGCACCTTGATCCTATCAGAGGAACATCCGTGTGGTTCGACCTTCAGACCGTTGCGGTCAG
CC_OL_003_N13	CC1G_05488															YML106W	URA5	Major orotate phosphoribosyltransferase (OPRTase) isozyme that catalyzes the fifth enzymatic step in de novo biosynthesis of pyrimidines, converting orotate into orotidine-5'-phosphate; minor OPRTase encoded by URA10			0		AAATCCCCTCCTTCGACGTCCTCTTCGGGCCCGCCTACAAAGGCATCCCCTTCGCATCCACCACCGCTCT
CC_OL_003_N14	CC1G_05458										+												CTGGCTTTCGGATTCGCCATACCATTTTTCCTTCGCTTCTGCATCGCATTCTTGTCATCTTTTTCATCCC
CC_OL_003_N15	CC1G_05453		+																		6		GGTTTTGACGATGAAGAACAACCCTCAGTTGCTCGATCGTTGCTGGTACTCCATAGCTATGGCCCTGATC
CC_OL_003_N16	CC1G_05482	+														YBL039C	URA7	Major CTP synthase isozyme (see also URA8), catalyzes the ATP-dependent transfer of the amide nitrogen from glutamine to UTP, forming CTP, the final step in de novo biosynthesis of pyrimidines; involved in phospholipid biosynthesis			0		CTGGGGGCTTCGGTCAACGAGGCACAGAAGGAATGATGCTTGCCATCAAGTATGCTCGAGAACAAAAGAT
CC_OL_003_N17	CC1G_05539															YML057W	CMP2	Calcineurin A; one isoform (the other is CNA1) of the catalytic subunit of calcineurin, a Ca++/calmodulin-regulated protein phosphatase which regulates Crz1p (a stress-response transcription factor), the other calcineurin subunit is CNB1					TGGTACACGTTTTGGCTAGGATAGATACACCCGCTCTTCTGCGATTCGTCCGTCGCTTCCTTGTCATGAT
CC_OL_003_N18	CC1G_11326															YGL189C	RPS26A	Protein component of the small (40S) ribosomal subunit; nearly identical to Rps26Bp and has similarity to rat S26 ribosomal protein					TGCTGGAGGGGACCAAGAAACGACGATCCGGCGGTCGCAACAAGAAGGGACGTGGCCACGTTAAATTTGT
CC_OL_003_N19	CC1G_10893																						GGCTCACGCGAGACTCTGGTTCAATAAGGACGAAGAGATAGAGATGGGTGACCATCAATCAGGTTATGGG
CC_OL_003_N20	CC1G_10646															YHR037W	PUT2	Delta-1-pyrroline-5-carboxylate dehydrogenase, nuclear-encoded mitochondrial protein involved in utilization of proline as sole nitrogen source; deficiency of the human homolog causes HPII, an autosomal recessive inborn error of metabolism					TTCGTGGGGCTTGAGGACTTCCAGTATCCTTCCAACTTGGTGTAGTGGGATGAATGTTGCGATTGGACTC
CC_OL_003_N21	CC1G_14713																				0		TATTCCTCGCCCTTGTCATCAACTACGTCCACACGACCACTCCCAGCCAAATAATTATCGCCTTGAAGCG
CC_OL_003_N22	CC1G_12427															YOR369C	RPS12	Protein component of the small (40S) ribosomal subunit; has similarity to rat ribosomal protein S12			1		AAGGGAAAGCTCTCTGTCGAGGAAGCCCTTCAACAAGTTTTGAAGAACGCCCTCGTTCACGACGGTCTCG
CC_OL_003_N23	CC1G_12431								+							YLR330W	CHS5	Component of the exomer complex, which also contains Csh6p, Bch1p, Bch2p, and Bud7p and is involved in export of selected proteins, such as chitin synthase Chs3p, from the Golgi to the plasma membrane			5		AATCGACAAAGAATACACTTTCCAACTCATCCTACGCACAACGGCTGGCACGTACCCATCACCCCTGTTG
CC_OL_003_N24	CC1G_07916																						CCGCGCCAACCACATACCACTATTACTACTCGCGGTTCGAGCTATCCATGTATACTTCGTCTTCTCTTGG
CC_OL_003_O01	CC1G_07918																						ACACATCTGTCGTTTGGTTCCTCGCTTGACCCACGGACATCCACGCACAACACATACTCCACACTCACCC
CC_OL_003_O02	CC1G_12136																				0		TGTTGCCGTCAAGACACCAGTTGACCCACGACTCGCTCTATCGCCCTCGTATCCTGTTGCACCTCCAAAG
CC_OL_003_O03	CC1G_08232															YFL039C	ACT1	Actin, structural protein involved in cell polarization, endocytosis, and other cytoskeletal functions			0	act1	AAGATGACTCAAATCATGTTCGAGACCTTCAACGCCCCCGCCTTCTACGTCGCCATCCAGGCCGTCCTCT
CC_OL_003_O04	CC1G_08211												+			YOL120C	RPL18A	Protein component of the large (60S) ribosomal subunit, identical to Rpl18Bp and has similarity to rat L18 ribosomal protein; intron of RPL18A pre-mRNA forms stem-loop structures that are a target for Rnt1p cleavage leading to degradation					CCGCAAGTTCGAGCGTGCTCGTGGTCGCCGAAAGTCTCGTGGTTTCAAGGTGTAATTTTTGTCGTACACG
CC_OL_003_O05	CC1G_08200															YDR221W	GTB1	Glucosidase II beta subunit, forms a complex with alpha subunit Rot2p, involved in removal of two glucose residues from N-linked glycans during glycoprotein biogenesis in the ER			0		AGTTGTGCCTGTTCAAGGAAGCTAAGCAGAAGCCTAATAGCGGTGGCCAGACTTTCAGTCTAGGACGCTT
CC_OL_003_O06	CC1G_11096																				0		AATTTCGCTCCAACCTACAAATACGACCCACGCTCACACGAGTACGACACTTCAGAAAAACGGCGTACGC
CC_OL_003_O07	CC1G_11099															YAR014C	BUD14	Protein involved in bud-site selection, Bud14p-Glc7p complex functions as a cortical regulator of dynein; diploid mutants display a random budding pattern instead of the wild-type bipolar pattern			0		AAACTCCCAAGTCAACGGAACGCAAGCCCGGTGTGCTGCTCAAGGACGATTTTGGTATCTCCCATATGAT
CC_OL_003_O08	CC1G_06685																						GGCGAGGATAGAGTCCGTTAAGCTCCTTGGTTGAAGGGCTAGCGAGTTTCTGGATATATAAACGACGAGC
CC_OL_003_O09	CC1G_06646															YIL142W	CCT2	Subunit beta of the cytosolic chaperonin Cct ring complex, related to Tcp1p, required for the assembly of actin and tubulins in vivo			0		AAGGCGTTGGAGGCTGCTGCTGTGGATAATCGAGGGGATCAGCAAAAGTTTAGAGAAGATCTGTTTAATA
CC_OL_003_O10	CC1G_06653												+			YKL060C	FBA1	Fructose 1,6-bisphosphate aldolase, required for glycolysis and gluconeogenesis; catalyzes conversion of fructose 1,6 bisphosphate to glyceraldehyde-3-P and dihydroxyacetone-P; locates to mitochondrial outer surface upon oxidative stress					TGGCGTCTTGACTGGCGACAATGTTCGCAAGGTCTTCGAGTATGCTAGGGAGAACCAGTTTGCTATTCCT
CC_OL_003_O11	CC1G_06656															YKL085W	MDH1	Mitochondrial malate dehydrogenase, catalyzes interconversion of malate and oxaloacetate; involved in the tricarboxylic acid (TCA) cycle; phosphorylated					GGCGGTGGTTAGATGGTAGAGTAGAGCATTTTTGAGGTGCATATAATTTTCATTACATTGCATAATTCTC
CC_OL_003_O12	CC1G_06703		+				+		+				+										ATACACCCCTGTTCTATTTGGTAGCCAGCGGACCTGACTCTGCTGGTGTTAATTTCTTGCCCGTCCGACT
CC_OL_003_O13	CC1G_08888		+									+		+		YBL015W	ACH1	Acetyl-coA hydrolase, primarily localized to mitochondria; phosphorylated; required for acetate utilization and for diploid pseudohyphal growth			6		ATGAACACTCCTCTCGAAGTCGACATTTACGCCCATGCCAACTCCACCAACGCTCTTGGCTCAAGAATGT
CC_OL_003_O14	CC1G_13388	+																					CAGACTGTTGCCGTTGCGTGATGCGTGAAAGTTACGGTTGGGTATGGCTTTGCTTTGTAGGGTTGGAGAA
CC_OL_003_O15	CC1G_10601	+																					GCACTGACCGTGACTTATATCCCTTACATCCTTGCCGAGTTACCATCGAACCTTCTGCTCAAAGCTGTCG
CC_OL_003_O16	CC1G_10622					+		+				+		+							0		TGGAATCTTTGGAACACCCTTTCGTAAATTTCCTAGGCCCTCATTCGGTACCATGCGTAACCGCCCTCGT
CC_OL_003_O17	CC1G_11368															YOR312C	RPL20B	Protein component of the large (60S) ribosomal subunit, nearly identical to Rpl20Ap and has similarity to rat L18a ribosomal protein			3		AAAATCTACAGGATGCGAATCTTCGCTCCTAACGAGGTCGTCGCCAAGTCCCGCTACTGGTACTTCATGA
CC_OL_003_O18	CC1G_11355																				0		GATAGGCTCAAGGCGATCAAGGTTGAGTATGACCCCGACAGTTTGTTCTTGGTACCTCTTGGTGTTGGCT
CC_OL_003_O19	CC1G_11364												+		+								CCTTTCGCCTTAGTAGCAGGAATGGTTTTTGGTATTTTGCTTCCGGTTTGCGCATGACACCTTGACGCCG
CC_OL_003_O20	CC1G_09588																				0		TCTCACCCCATGCCGGAACCTTTCCCTTCTCCGCCAAGCAGCTCTTGATCATCGAGTCCAAACCAATAAC
CC_OL_003_O21	CC1G_09582															YDL216C	RRI1	Catalytic subunit of the COP9 signalosome (CSN) complex that acts as an isopeptidase in cleaving the ubiquitin-like protein Nedd8 from SCF ubiquitin ligases; metalloendopeptidase involved in the adaptation to pheromone signaling					TTCGATGCCGCAGAGAACCAAAGGATAAACAGGGAGGCACCATGGTCCAAGGACCCTACATACTTCAAGT
CC_OL_003_O22	CC1G_09659	+																					CTAATCTCTTCTTGTTTGTGTGTATACTGTTGTTTTTTGTACGAGCCTATCAACGGACGCTTCATTCTCC
CC_OL_003_O23	CC1G_09654										+		+								0		GCGTATCTCTGATGTCTTCAAGGAGGACATTGGTCTCGGTGGTGTCGTCAGTTTACTCTGGTTCAAGCGA
CC_OL_003_O24	CC1G_09658																				0		CAAAAATCCTAACAAGGTCATTCAAGCGCTTAACAGGCACGCCGCTCAGAAGACGGACACAGCTGTTCAC
CC_OL_003_P01	CC1G_09189																						CAACGTCTCCCTCTAAGGAGGAGCTTTCACATTATCTCCGTGACCTTTCACGGTAGGCATTCCCTCCTGA
CC_OL_003_P02	CC1G_09176															YEL002C	WBP1	Beta subunit of the oligosaccharyl transferase (OST) glycoprotein complex; required for N-linked glycosylation of proteins in the endoplasmic reticulum					AACACCACCTGGTGAATGCTACGGAGCCCAAGGAGCAATACACTATCAACGACAACATTGAATTCGCGGC
CC_OL_003_P03	CC1G_13990																						ATCACTTCCCTACGACTAACGGACACTCAACTACCCTTGCACTACCCCTTTGTGTTATTACCCAACCACG
CC_OL_003_P04	CC1G_06149													+									GTAGAGCCGTGGTAGTGCTGAACTATGCTCTGTATTTCACTTCTAACAGCCGCAGGTGACGTCGTTGTGA
CC_OL_003_P05	CC1G_06057															YCR044C	PER1	Protein of the endoplasmic reticulum, required for GPI-phospholipase A2 activity that remodels the GPI anchor as a prerequisite for association of GPI-anchored proteins with lipid rafts; functionally complemented by human ortholog PERLD1			0		GTTGGAGTTGTTTGACTTCCCGCCGTGGTTTAGGACGATTGACGCCCATTCATTATGGCATGCTGCTACA
CC_OL_003_P06	CC1G_06090												+			YLR249W	YEF3	Translational elongation factor 3, stimulates the binding of aminoacyl-tRNA (AA-tRNA) to ribosomes by releasing EF-1 alpha from the ribosomal complex; contains two ABC cassettes; binds and hydrolyses ATP					GCACATGCTATTCGGTCTCTCTTCATTCCCCCCACATTTTCGTTTCATCCTCGTTACGACCTTGTCATGC
CC_OL_003_P07	CC1G_06151		+										+										CGGTGGGTCGGATGGGCTTGGGTTTGGAAACCGGATGAAGTAGAACGTTTATTTTTCGATGGCTCTAGTC
CC_OL_003_P08	CC1G_12508																				3		AACCTGCAGGCCGACTAGGAAACGCACTCTACAAAACACTAGTCGAAAACGCAGAACGCAAATGGTCGTG
CC_OL_003_P09	CC1G_10412															YGR054W		Eukaryotic initiation factor (eIF) 2A; associates specifically with both 40S subunits and 80 S ribosomes, and interacts genetically with both eIF5b and eIF4E; homologous to mammalian eIF2A			0		TGTCCACGATTTCGGCCTGGCTCCATACAACTTCATTTCCTTCAACCCTCAAGGTCGACTTATCGCTCTC
CC_OL_003_P10	CC1G_10394		+		+		+		+												0		ACGGCTCCGACCTCTTGGAGCGCGACTTCTTCGACGAAGACCTCTTCGAACGAGACTTTGATGCAGAACT
CC_OL_003_P11	CC1G_10395																						GACGAGCTCGATTAAACGCTTCGTGGATGGTTTGTGTTGTTGTAGTTTCATAGGATATGGGGTATCAAAT
CC_OL_003_P12	CC1G_10398		+				+		+					+							8		AGAAGAGCACTAGCTCCAACAACAAGCAGTCTTCCACCACCAAGCGGAACCCTAACTCGAACAAGAAGTC
CC_OL_003_P13	CC1G_02650															YLR164W		Mitochondrial inner membrane of unknown function; similar to Tim18p and Sdh4p; expression induced by nitrogen limitation in a GLN3, GAT1-dependent manner					GAGGGTGACTATACGCGGATGGAGCAAGTGCGAGCAATTCACAAGCGTCTCTACAATGACATGTCTACAT
CC_OL_003_P14	CC1G_02572															YAL012W	CYS3	Cystathionine gamma-lyase, catalyzes one of the two reactions involved in the transsulfuration pathway that yields cysteine from homocysteine with the intermediary formation of cystathionine			8		CTAGCTGAGAGTTTGGGAGGAGTGGAGAGTTTGGCTGAGCACCCTGCTAGTATGACGCATGCTGGTATAC
CC_OL_003_P15	CC1G_10970															YDL119C		Putative mitochondrial transport protein; GFP-fusion protein is induced in response to the DNA-damaging agent MMS; the authentic, non-tagged protein is detected in purified mitochondria			1		AGTCGTGAAGACCAATACCAATCCTTCTTTGGCACCGTACGGGCCGTTGTGCGAGAGCGCGGTCTAAAGG
CC_OL_003_P16	CC1G_05313		+																				CCTTAACTGGCTTTTCGCGGACTGGGAGGAGTAAACGACCTTCATAAGCGAGATACCATTACCTACGGTT
CC_OL_003_P17	CC1G_05297																				6		CCAAGTTCAAGGACAAGCCGTCGGAAACGGGAAATACAAGATCGCCAACGTCAAAGGTGGCACTGTCGTT
CC_OL_003_P18	CC1G_05237															YBL038W	MRPL16	Mitochondrial ribosomal protein of the large subunit			4		CGGACATCCCGGTTTGCATCAAGGGTAGCGAAACCCGTATGGGTAAGGGTAAAGGAACCTTCGAATACTG
CC_OL_003_P19	CC1G_05219		+						+		+												CCACCCTTTGGTGGATCTGGGACACTTCGCATATTTATAGACCTTCCTTGTTGTGTTCGACTCGGTCTTG
CC_OL_003_P20	CC1G_05222																						TATCCCCGCAAGACACATCCACCTGCCGTGAACGTTTAGTTCGGTTTTATTCGCTTTACAGCGCGTTCTC
CC_OL_003_P21	CC1G_05243												+										GCGGCGAAGCTTTAGTCAGTAAATAGTCTATATCGGTGTACCGTGTAGCCACGTTCTCCAACCCCATCTC
CC_OL_003_P22	CC1G_05262				+								+			YGR284C	ERV29	Protein localized to COPII-coated vesicles, involved in vesicle formation and incorporation of specific secretory cargo			0		TATCGGCCGCTTCTTGATTGTGGTCACCTTTTTGGAGGATGCATTGCGAATTCTGACCCAGTGGGGAGAC
CC_OL_003_P23	CC1G_15699		+		+											YOL078W	AVO1	Component of a membrane-bound complex containing the Tor2p kinase and other proteins, which may have a role in regulation of cell growth					TGTTGAACCGTGGATCGAGGAACAAGAGATACGACTTTGAAGCCGAGAATTCCAGAGTCGCTGCGGAGAT
CC_OL_003_P24	CC1G_15700				+									+							6		AGACACTCGCATTTACCTGTCAATCTTTTCGTGCAACAGGAGTCCAGAGCTGTGGGGTCCCGATGTTTTC
CC_OL_004_A01	CC1G_07270																				0		AGTATTACCAACGTGCTGTGGGAGGGTTTGGGCGTGGAGGATAAGATTAGGAGTTTGGGTGAGAAGATGG
CC_OL_004_A02	CC1G_07214						+		+														GTAGTCTATTCTTTGCCTTCAACGGTGCCTCGAGATCGACGAGATCAATATGGAAAGGCTTAAGCGCCGG
CC_OL_004_A03	CC1G_09480																						GCAATATGCACGACAAGAAGTGGATCGTAACCCACCAGCCCCAGCATGGCGAGAACGTCTTCACCGTCGT
CC_OL_004_A04	blank																						0
CC_OL_004_A05	CC1G_09490						+						+								3		GTTGGCTCCCGCTTTCGAAGTTAAGAAGGGTAAGAAGACCTATTTGGGGAGCTCCGAGGATGGTGAAATG
CC_OL_004_A06	CC1G_11280																						ACTGAGGGCGTCTATGTACTTGGCGTGGATCGGGAGTGAACCAAGCTTGAATTGTATTGTAGGAGGGATG
CC_OL_004_A07	CC1G_11271															YPL152W	RRD2	Activator of the phosphotyrosyl phosphatase activity of PP2A,peptidyl-prolyl cis/trans-isomerase; regulates G1 phase progression, the osmoresponse, microtubule dynamics; subunit of the Tap42p-Pph21p-Rrd2p complex			0		GTGCAGGGACAGAGGTATTCGTTGAGTGGGGTGCGGCCTGTGCCTTTTGATTAGATGTTTGTAGTGAAAG
CC_OL_004_A08	CC1G_11265																				0		GGCGTTTGTCAAGGGTGACAACTATGGATTGAGTGAAGTTGGAAAGGGTGCTCAGTCGGCGTTTGCATGA
CC_OL_004_A09	CC1G_10440															YER003C	PMI40	Mannose-6-phosphate isomerase, catalyzes the interconversion of fructose-6-P and mannose-6-P; required for early steps in protein mannosylation			6		ACTGAGCCAGCAGTTCCCAGACGACATCGGCATTCTCTGCCCGTACATCCTCAACCATCTTTACCTCAAA
CC_OL_004_A10	CC1G_10353																				8		GTGTTCTACCCAAGCTATTACCACAAGCGTCGTCCCGAGCCTAAAGGAATACCGACTTCCCTTGGATATG
CC_OL_004_A11	CC1G_13484																						GCGGCGAGAGTCATTAGAACCCTAGCGCGAACGGATGTACCCTTACTGTCAAGTTTGTATCTAGAATTCG
CC_OL_004_A12	CC1G_03089						+																CCCACAACATGTTATTACCGCGGTTGGCCCTGAGCTTCTACGCATGTACCGGGACTCTTATTAGACATTC
CC_OL_004_A13	CC1G_03149											+									3		CCCTTCTGCCAGTTCTTCGAAGTGTGCGACGTAAAGACTAGGCCTAATTGCCCCTGTATTGATTCTGAGG
CC_OL_004_A14	CC1G_03154						+		+		+		+								0		ATGTCACGACCAACCGAACTGTCTTCCCCTTGAACGGTGGCCAATTCCGTATCCGACAGGGCCACGAGGA
CC_OL_004_A15	CC1G_04926						+														0		ACGAAGGTATGCTCATTGCTTGCGGTGAATCATCGTCGTCTGTGTTGGTTTCTGATCGACGGCCTTCAGA
CC_OL_004_A16	CC1G_04843		+																				TTCCCTACTATAATTCATTCCATAATCGCCTAGTAGACAGACATCGCAATACACGCGTCTTGCATGCCGA
CC_OL_004_A17	CC1G_04927						+		+												9		GAGCGGCGGGAATCAGCGACATCCGCAGGAGAGATCACAACACTTCAATTTAACCCTGTTGCAATTGAGG
CC_OL_004_A18																						coH28/29/30/31/32/34	TCCAAGTCGCTCGACCAGTCCCTGACCAAGCTCCTCGGCCTCCTCAAGGTCGACGTTAAGCAGATCACTG
CC_OL_004_A19	CC1G_13813																				0		CACCTGCATTAACCCCTGCCCTCGTTGTTAATGCGACAGCTATACATGAAGCCCAAAGGCTAAGCTTTTC
CC_OL_004_A20	CC1G_08270																				0		GGAGCTGACCAAGTGGCTAGGAGCGGACGCAAGGTGGTTTGAATCCGTTTTTCCCAAATACAAATTCCCT
CC_OL_004_A21	CC1G_08291	+													+	YKR059W	TIF1	Translation initiation factor eIF4A, identical to Tif2p; DEA(D/H)-box RNA helicase that couples ATPase activity to RNA binding and unwinding; forms a dumbbell structure of two compact domains connected by a linker; interacts with eIF4G					TTCTACAACACCCAGATTGACGAGATGCCTCTCAACGTCGCCGATCTTATCTAAGCGCGGCCATGCCTTT
CC_OL_004_A22	CC1G_10178																				0		GCAGTGATGCTTGGCAATGTTGCTGTCTGGCTCTTCACCATCGTCTATTCGGTGATATCGCCTGAATTCG
CC_OL_004_A23	CC1G_11380												+		+	YGL011C	SCL1	Alpha 1 subunit of the 20S proteasome involved in the degradation of ubiquitinated substrates; 20S proteasome is the core complex of the 26S proteasome; essential for growth; detected in the mitochondria					GATCAGGTTATTGAGATGGCGATTGAGGCGATGTCGGTTGTGCATGCTACGGATTATAAGCCCGGGGAGA
CC_OL_004_A24	CC1G_11377												+			YMR079W	SEC14	Phosphatidylinositol/phosphatidylcholine transfer protein involved in coordinate regulation of PtdIns and PtdCho metabolism, products of which are regulators in Golgi to plasma membrane transport; functionally homologous to mammalian PITPs			6		AATTGAGAACCTTCCCAAGGAATTCGGCGGACTCTGCGATTGCCCAGGTGGTTGTTCGCTGTCTGATGCT
CC_OL_004_B01	CC1G_11396															YOR310C	NOP58	Protein involved in pre-rRNA processing, 18S rRNA synthesis, and snoRNA synthesis; component of the small subunit processome complex, which is required for processing of pre-18S rRNA			3		AACACGACACGCCCAAGTACGGATTGATTTACCATGCTTCATTGATTGGCCAGGCGCCACCGAAGTTGAA
CC_OL_004_B02	CC1G_09955															YIL018W	RPL2B	Protein component of the large (60S) ribosomal subunit, identical to Rpl2Ap and has similarity to E. coli L2 and rat L8 ribosomal proteins; expression is upregulated at low temperatures					GGTATACTGCATACACTATGGGCACGATTTTTTCCCTCGACCGCATGTTACGAGACCCACACGCATCCAT
CC_OL_004_B03	CC1G_11842															YDL081C	RPP1A	Ribosomal stalk protein P1 alpha, involved in the interaction between translational elongation factors and the ribosome; accumulation of P1 in the cytoplasm is regulated by phosphorylation and interaction with the P2 stalk component			0		ATACCACGCGCACGCACGTTTTCATCGACATCGTCTTCTGTTTCCACATCCCCCGCTGTAACACAATCTA
CC_OL_004_B04																							CCCCAGCAGCGCTGGGTATTGTTGCTCTTCCTATCGTCTTATTGAAACGACACGTTGGGTTTTGTATTTG
CC_OL_004_B05	CC1G_12104																						GCGACGGGACTGTGTTCTAGGCATACTTATACACTCCACGCTCTGTATCTTGACCTTTGATGGCGAATGG
CC_OL_004_B06	CC1G_12110		+																				GTTAGACTGATAGGCGCTGGGCGCAATGACGACAGTGGAGTCCTGGAAGACTTATAATACCTTGTGCTTG
CC_OL_004_B07			+		+								+								6		GCGATGTGCATTGTGCACTTTGGGTTCTCGTATATGACTATGGGAAGCTGGATACCCGACCCATTCTTCC
CC_OL_004_B08	CC1G_07859																				0		TTGAGCAAGCTCATCGGTGACCGGTGGAACAGACTCCCAGAAGCGGCGAAGAACCGCTGGAGGAATTATG
CC_OL_004_B09	CC1G_07858																				0		TTCTCCACGGACGAACAACCTTACATCAACCACTACTCCATGCACCCTATGGGGCTCGGATACAACCATT
CC_OL_004_B10	CC1G_07840																				0		TATTCATTCAACCCCGTACCTGATCAAGTGCCCATTGGTTTACCGCCTGGAGCGTATTCGATGCCTCTCT
CC_OL_004_B11	CC1G_07855																				0		GCGTTCCAACAAAACACCACTGTATACCCTTACGATCCCGACGTTGACGCGCTATTTGGAGATCTATCCC
CC_OL_004_B12	CC1G_07876																				0		ACAACGACCTTGCTGAACGCGAGAACAAACGACCCAAGAACGATAGGACTATCGCCGCCTTGAAGAAGCC
CC_OL_004_B13	CC1G_01077	+														YNL104C	LEU4	Alpha-isopropylmalate synthase (2-isopropylmalate synthase); the main isozyme responsible for the first step in the leucine biosynthesis pathway					TTCCGCTCCCATTACCACTTTGGCTCCAAGTACGCTGGTCGCTTGGTTCTTAGGAACTTCAAGATCTCTG
CC_OL_004_B14	CC1G_06427																				0		TGCTCCTACATTGTACAACAGTCAAAGCCAATGGACCCAGCAATTGAGCGAACCGTACCCTATTTCCGGC
CC_OL_004_B15	CC1G_08933																				0		AAGAACGACCATCAGGCTACGTCAGAGTCATCCCAGCTCTTCAGTGAACGCAAGGTTCAGGACTACAAGG
CC_OL_004_B16	CC1G_09089																						TCTGCAAGGAGCAGATGAAAAAATGGAACGAGGAGAACCCCGGTCGTGCGAAGGAGGCGATGACACAGAT
CC_OL_004_B17	CC1G_07745																				0		TTCAGGAAGGGACAGATTCTTCTTGGCCCCGAAGAAATGGAAGGTGAATACGCCGGAGAAGAGCTCAGAA
CC_OL_004_B18	CC1G_07744															YIL010W	DOT5	Nuclear thiol peroxidase which functions as an alkyl-hydroperoxide reductase during post-diauxic growth			0		GCAGCTTGATCGCAGCCTTGGGAGCTAGCGAGGGTGGAAAGACGAAGCGCAGCCACTTCATCTTTGAAAA
CC_OL_004_B19	CC1G_01334																				7		TACGAACATCAACTTCAGCATTCTCCAAAGCCCTGCCTTCCCCACCATCAAGTTGGAATCATCGGAGAGC
CC_OL_004_B20	CC1G_00255																				0		AAGACTCGAGCTGTCCCCCCAGAGATAGAGCATCGACAGCAAAACCTTAGTCGCCTTGCAGGACAATGTT
CC_OL_004_B21	CC1G_13994																				0		ATGAATTCGGTATGCCCAACATGCCACATCCTACGACTATCAACCCAAGCGAGTACTTTGGCAGCTCAGC
CC_OL_004_B22	CC1G_05275															YLR450W	HMG2	One of two isozymes of HMG-CoA reductase that convert HMG-CoA to mevalonate, a rate-limiting step in sterol biosynthesis; overproduction induces assembly of peripheral ER membrane arrays and short nuclear-associated membrane stacks			0		GAGGCTGTCATTCCTGGCAAGGTTGTTAAGACTGTGTTGAAGACCACCGTCGAGGCTTTGGTCAACTTGA
CC_OL_004_B23	CC1G_03536																				0		GGCATAACTTGATGTATCCGGAGCACCAGTACGTGCCAAATTCTAGGAAGTCGAAAGGACCGGGTGTGAA
CC_OL_004_B24	CC1G_05598																						TCGCCAAATTTTTCGTTGGGCAATTTCTCGATGGGCGATTTCTCGGCGCGCAGTATGGAAGACGACATGT
CC_OL_004_C01	CC1G_05664													+		YBR218C	PYC2	Pyruvate carboxylase isoform, cytoplasmic enzyme that converts pyruvate to oxaloacetate; highly similar to isoform Pyc1p but differentially regulated; mutations in the human homolog are associated with lactic acidosis					GAAGCCAATAAACTTTGCGGTAACATCATCAAGGTCACTCCCTCTTCAAAGGTCGTCGGAGACTTCGCCC
CC_OL_004_C02	CC1G_03744																				0		ATTACTCGCGACGTGGAGCACGACCACCGGCACATCAGCCGCATCATTGGACATTGTTGGAACAAGATGT
CC_OL_004_C03	CC1G_05834																				0		AACACCAATGATCCCCGGCTTTCCTTTAACACCTCAGGATCTGATCGTATGTCCCAGAACATGGCGCCAT
CC_OL_004_C04	CC1G_10870	+																			0		TAACCCTCTTCCAGGCCCCAGTTATTCCAACAACCACCAGAATACAGCTGCCGCCGATAATTTCGATGAC
CC_OL_004_C05	CC1G_07030															YPR065W	ROX1	Heme-dependent repressor of hypoxic genes; contains an HMG domain that is responsible for DNA bending activity			3		AATTCTGGTGGGATACCAGCTCTGCAACACCCAACCCCTCTGCGACACTATCATTCGACGACAAGACCTT
CC_OL_004_C06	CC1G_06994																				0		ATTATGTGTATCGGCCGCAGAGGCAGAAGGACAAGGATGGACGGTCGAAGAATAAGCGGTCGGCGTCGAA
CC_OL_004_C07	CC1G_06994																						ATTATGTGTATCGGCCGCAGAGGCAGAAGGACAAGGATGGACGGTCGAAGAATAAGCGGTCGGCGTCGAA
CC_OL_004_C08	CC1G_07391																				3		ATCAGGAGCTTGACGGTCGCCGGATCAAGGTCAACATTGCTAATGCTCGAGGCTCGGGAGGTGGAGGTGG
CC_OL_004_C09	CC1G_07617																				0		AATCACATCAGGGCGATTCCACCGATCAAGATCCAGCCTTGTCTAAATCACCCTCTAGCGACGAGGTCGA
CC_OL_004_C10	CC1G_11400															YKL032C	IXR1	Protein that binds DNA containing intrastrand cross-links formed by cisplatin, contains two HMG (high mobility group box) domains, which confer the ability to bend cisplatin-modified DNA; mediates aerobic transcriptional repression of COX5b					AAGCAGCAGCGTCCAAAAAGGCAAACAAGGGTGCACGAGGCAAATCAAATAAAGAATCTGCTCCTGCCGC
CC_OL_004_C11	CC1G_13078																				2		GGAAACAGGCTGACCCCAAAATCGTCAAGTCTATCAACGAGGTTCGCGTGAACCAAGGCAAACCACGCCT
CC_OL_004_C12	CC1G_07470																				0		ATGGATATGAACTACGGCAATACCGGTGCTTACCCTGACGCCAACTCGTACAACTATGGTCCTCTCGACA
CC_OL_004_C13	CC1G_07471																				0		TTGTCCTAGGGGCTATATCGCACTTCTTCGATTGGGCGGCCTGGTCTTGCCTTCTGTTATTCAAAGGCAA
CC_OL_004_C14	CC1G_04121	+																			3		AGAGTCAGCACGTGTCCACGTCGGTCGAGACCAACCATTCTACGCTCTCCAAGATCATCGGTATGACTTG
CC_OL_004_C15	CC1G_15525	+													+	YGR285C	ZUO1	Cytosolic ribosome-associated chaperone that acts, together with Ssz1p and the Ssb proteins, as a chaperone for nascent polypeptide chains; contains a DnaJ domain and functions as a J-protein partner for Ssb1p and Ssb2p			4		CAAAAGGCACACGAGGTTTTGACCAACCCTGAGAAGAGGAGACAGTTTGACTCCGTCGACCCTCAATTCT
CC_OL_004_C16	CC1G_11633																				0		GACTACAATTCCACGCTTGACTACCCCCTTTACCCTCAGCAAAACGCCCAATACACTTCCTCAGAACTCG
CC_OL_004_C17	CC1G_08141																						CAATTCTATTGCGGACAATTGAAATACGCGTTTAACAGCATCGCTATGATCGTGGAGAACGACGCGACGC
CC_OL_004_C18	CC1G_00827	+														YML126C	ERG13	3-hydroxy-3-methylglutaryl-CoA (HMG-CoA) synthase, catalyzes the formation of HMG-CoA from acetyl-CoA and acetoacetyl-CoA; involved in the second step in mevalonate biosynthesis			2		TATCAAGGGTGACACCTCCGAGATCAAGGAGAAGCTCAAGTTGAAGGAGCGACTTGCTGCCATGACTGTT
CC_OL_004_C19	CC1G_11980																				0		AAAATAATTGGCATGACTTGGCAAAACCTCCCCAACGAGGAACGCCAGGTATGGCATCGAAAGGCGAAGC
CC_OL_004_C20	CC1G_06438															YDL182W	LYS20	Homocitrate synthase isozyme, catalyzes the condensation of acetyl-CoA and alpha-ketoglutarate to form homocitrate, which is the first step in the lysine biosynthesis pathway; highly similar to the other isozyme, Lys21p			3		GGCCTTCAACTCACTGATGCTGAGGTTAAGGACGTTACTGCCAAGATTAAGGAACTCGCTGACGTCCGAA
CC_OL_004_C21	CC1G_07395																				2		CTGCCGTGATGTTGGAAGTGACGAGTAGGTGGATGTCAATCGTGTTTGCGCTGTTGTTCTTCGGGTTCTT
CC_OL_004_C22	CC1G_15339																				0		AAGTCCACGCGGAGTTTGGTATCATTGGCCTCTTCTCCCGAGAGTATTTGCGCCCTGGAGAGTTTCCCAT
CC_OL_004_C23																					0		GGTATCCCGCACTTGTCATGGCTCTTCGTGGATTATATTGTCAAAGCTCACCGCTTCGACATTTTGGAGG
CC_OL_004_C24	CC1G_15338																					rcb2_B43	GGATGAGTACAAGAAGTGCTTCACTTGGGTCAAATTCTCAAGGTATGTTTCAGCTGCAGAGCCGTCCTGG
CC_OL_004_D01	CC1G_02151																						CGACATCACTGCAAGGTTTATCGTTGGATGCTCTTGGGCCATCCCTGCTGCCTCGCTTTGCATCAATCGT
CC_OL_004_D02	CC1G_02255																				0		GAAGACGTAATCGATCCTCGACTAGTATCAACTGTTCACCAGAGAGCAGCAACCCTTCGGTGCACGAAGT
CC_OL_004_D03													+		+						0		AACTGTGCACGCGCTCGCGCACCATTTGGGTATTCCGACCTCGCTTATGTTTATTAATTGTCCTGGTCCA
CC_OL_004_D04	CC1G_02153																				0		TGTCGCGGCTACTTGGTGGATCCTTTTCACTATCTCGACCATATTCATCGTCTTGACCCTCGCATTTGGG
CC_OL_004_D05	CC1G_01828																				3	d1-1	CTCCGTTGAAGAATATTCTTGTCGAAAACGTCCTCGGGGTGATTCATCTCACCATGACCAGTCGAAGTCG
CC_OL_004_D06	CC1G_01752																				3		TCATGGAGAGGGCTATGAGGATCAAGTCTCTCGACAATTCCCCGGTCAACGACCACCAGCTCCTTGTTCT
CC_OL_004_D07																					3	b1	TGATCTCCCTCCCTCGGCTCCTGCCGAGCCCACACCAGCAGCTAAGCTCAATGTTATCGAGCCACTTGAA
CC_OL_004_D08	CC1G_01834																				0		CCGCTCCCCTGGAGATTGAAATCTCCAATTTGCCTTTCGAGCCTCTATCTGACCCATCGTCCTCTTTTAC
CC_OL_004_D09	CC1G_05280															YMR076C	PDS5	Protein required for establishment and maintenance of sister chromatid condensation and cohesion, colocalizes with cohesin on chromosomes in an interdependent manner, may function as a protein-protein interaction scaffold			0		GTATCGTTACTGCACCATTTAGCAATGAAGTTGAAGACGGTCCGGGATGCAGAGTCGCATTCACACACGG
CC_OL_004_D10	CC1G_02791												+			YPL022W	RAD1	Single-stranded DNA endonuclease (with Rad10p), cleaves single-stranded DNA during nucleotide excision repair and double-strand break repair; subunit of Nucleotide Excision Repair Factor 1 (NEF1); homolog of human XPF protein			0		TGCGAACATTCTTGTGATACCTGCGACCCTCACCGTTGGAGATTACATTCTGACACCCGAGATGTGTGTC
CC_OL_004_D11	CC1G_02962																						GAAAAAGCAGCTCTGCCACGCGACTGGTTTGAGTATGAGCCAGGTTTCCAACTGGATGATCAATGCTCGT
CC_OL_004_D12	CC1G_01962															YDR451C	YHP1	One of two homeobox transcriptional repressors (see also Yox1p), that bind to Mcm1p and to early cell cycle box (ECB) elements of cell cycle regulated genes, thereby restricting ECB-mediated transcription to the M/G1 interval			7		CCGTCAATGACGACTCCGCAGGACAATAATCAATCCGCTTATCTGGCGTTTGGAACAGACCAGACTTCTC
CC_OL_004_D13																							ACAGGGTGGGCGAACAGTGTTGCCTTCTTTCTCTACGGCCTTTCCAAACTTACCTTTTCCAGGTCTGTCT
CC_OL_004_D14	CC1G_04998																				4		AGATCCGTTTAAAGCAGCCATGGGATTGGTGTTGGCATCGAAACTTGGACTTGAATGGGAGGCACCAGGA
CC_OL_004_D15	CC1G_11243																						GTCTCGTTCACTATACGGCCCAAGAAGCTCTCTCAACGATCCTGTTGGAATGCTACCCCAATCCTCATGT
CC_OL_004_D16	CC1G_10926																				0		CCGGCGAATATGGCCCGCGTTGAAGAACAGCTGAGATTATATTTCCAGAAGAACCCGCAACTTGTGCAAC
CC_OL_004_D17	CC1G_07663															YNL272C	SEC2	Guanyl-nucleotide exchange factor for the small G-protein Sec4p, located on cytoplasmic vesicles; essential for post-Golgi vesicle transport			8		AATATCCCAAATTGGTAACGGATCGACAACGCAATCGCAGTCGCAGCAGGTCTACATCTTCAGAGTGGCC
CC_OL_004_D18																YIL026C	IRR1	Subunit of the cohesin complex, which is required for sister chromatid cohesion during mitosis and meiosis and interacts with centromeres and chromosome arms, essential for viability			3		GAAGGTCCTTCCCATGATGTTGAAACGACTCCTGTTAGTGATATGCAAGTGCGGCGGAAGCGTATCAGAC
CC_OL_004_D19	CC1G_12380																				0		TGCAGGCGGTGGACCAATACTCGACTTCCACTGCAACCACGCTTTACAATTCCAATCACTCGCTTTCACA
CC_OL_004_D20	CC1G_01849																				0	pab1	GGAACGTTCTCAAGGCCAGTCTACCGCCAGGTACTATGACAGGCGCACCCAAGAAACGGAGTGTCGAAAT
CC_OL_004_D21		+																					CAAGGTCTTTGCGAAAGACCCGTTGGATAGGGAGTTGGGCGAAAAGTACAAGAGAGAGGTGCTGCGGTGG
CC_OL_004_D22	CC1G_01808		+																		5	lim15/dmc1	TGACGAAACTTTCCGAGGAATTCAATATCGCTGTTCTCATGACCAATCAAGTCCAATCCGATCCTGGAGC
CC_OL_004_D23	CC1G_00690																				0		CCAGGACCGTGGTTCTTCCATTGCCACATCGAGTTCCACCTTGTCACCGGTTTGGCTGCTGTCTTCATGG
CC_OL_004_D24	CC1G_00631															YBR023C	CHS3	Chitin synthase III, catalyzes the transfer of N-acetylglucosamine (GlcNAc) to chitin; required for synthesis of the majority of cell wall chitin, the chitin ring during bud emergence, and spore wall chitosan			9	chs1	GCAGTCGAGGGATTCAAATTACGGCGAGAAACAGAACTACAGGTACTCTCTTACGTCCAACGCTGAAGTC
CC_OL_004_E01	CC1G_11144	+														YOL080C	REX4	Putative RNA exonuclease possibly involved in pre-rRNA processing and ribosome assembly			1	mipD	ATTATTCGTCGTCCGGGTCAGAAGAAGGATCAGCAGAAGAAGCAGTGGTGGAAGGAACTTCCAACAGCCG
CC_OL_004_E02	CC1G_03010															YNL250W	RAD50	Subunit of MRX complex, with Mre11p and Xrs2p, involved in processing double-strand DNA breaks in vegetative cells, initiation of meiotic DSBs, telomere maintenance, and nonhomologous end joining			5	rad50	GCCCAGATCAGCGCCAAAGAAAGCGAATGTGAAAAGCACACTAAGAAGATAACCTCGAGTTTGAGGGCCT
CC_OL_004_E03	CC1G_09263																					lcc6	ATTTGCCTAGGAACCAGGTTGTGGAGGTGCAGATTCCGAGTGGGTCGATTAGTAATAGTGGACCTCATCC
CC_OL_004_E04																					9	acs1	AATCCGACAAGTGGTGGGCAAAGAAAGCTCACGAGCTTCTCTATTGGGATCGACCATTCCATACCGTCCG
CC_OL_004_E05																					0	lcc1	TGAGCCGCATACGGTTGATCGTCTCCAGATCTTCACTGGTCAAAGGTACTCCTTCGTTCTCGACGCCAAT
CC_OL_004_E06	CC1G_09609																						CGGACCCTGGTTCTTCCACTGCCACATCGAACCCCACCTAGTCGGCGGTCTCGCCATAGTCTTCGCTGAA
CC_OL_004_E07	CC1G_02533																				7		GATAATGCTGGTCCCTGGATTCTTCACTGCCACATTGACTGGCATTTGGTTTTGGGCCTGTCTGTCGTCT
CC_OL_004_E08													+		+						0		TGGACCATGGATTCTCCATTGCCATATCGACTGGCATCTTGTTTTGGGGTTGGCTGTAGTGTTCGCTGAG
CC_OL_004_E09	CC1G_14571																				4	arf1	AACGATGTTGCGAACAGATTGTACTACAGCTCCACGACTGCGCATCCGACCAACGAGAATATTGGAGGTG
CC_OL_004_E10	CC1G_11387																					cfs1	GCCGCCGCTGTCATCACCTCCTCTACTTTCCCCGAATCAAGATACTCGAGTTACCAAGCTGAAGATTTCA
CC_OL_004_E11																					0	sdhC	ATTGCTAAACGTGTCACTGGTGCTGGCCTCAGTGTCTTGTTGTACGGTTTCTCGATCGCCTACCTTATCG
CC_OL_004_E12	CC1G_04470															YEL060C	PRB1	Vacuolar proteinase B (yscB), a serine protease of the subtilisin family; involved in protein degradation in the vacuole and required for full protein degradation during sporulation			0	sub	AACTGGGGTGCTTGTGTTGATGTCTTTGCTCCGGGCTTGAACATCTTGTCAACCTACAAGGGTAGCCGAA
CC_OL_004_E13	CC1G_05965								+				+		+						0	lcc8	CGGCGGCGCCGACGTCAACCTCTTGTTGAATTTGGACTTTAATGTGGACGCGTGGAGGTTTTATGTTAAC
CC_OL_004_E14	CC1G_10319															YMR224C	MRE11	Subunit of a complex with Rad50p and Xrs2p (MRX complex) that functions in repair of DNA double-strand breaks and in telomere stability, exhibits nuclease activity that appears to be required for MRX function; widely conserved			3	mre11	GACCCCGATGAAGGAAAGGCTGCTGGGTTCTCATTCCCAGCAATCAACTATGAGGATCCAAATTTCAATA
CC_OL_004_E15	CC1G_00662															YHR186C	KOG1	Subunit of TORC1, a rapamycin-sensitive complex involved in growth control that contains Tor1p or Tor2p, Lst8p and Tco89p; contains four HEAT repeats and seven WD-40 repeats; may act as a scaffold protein to couple TOR and its effectors			0	nip1	AAGATGTTGGTGGCATTATTCTTACTGGAGCGTCGCGGATGGCATTGTCAGGCTTTTCAGGAACTACGAC
CC_OL_004_E16																					5	rad9	CCTTCACTATTAAGCAAGGCCTAGCACATACTCTCCAATCGTTCCCGGTTATCATCGCTCTGGAGACCAG
CC_OL_004_E17	CC1G_03320															YHL022C	SPO11	Meiosis-specific protein that initiates meiotic recombination by catalyzing the formation of double-strand breaks in DNA via a transesterification reaction; required for homologous chromosome pairing and synaptonemal complex formation			3	spo11	TGGACATAATGCACGAGGGGCTTGTGACTGGCACGCCCACGACGAAACGAGATATATATTACAAGGACGT
CC_OL_004_E18	CC1G_04420																				3	num1	TTAATAATGCCCGTGCTCAATTGCAACACCAGCGGATACGGCAGACAAATGGGACGCTCCTTCAGACGTA
CC_OL_004_E19	CC1G_10826																					caf1	GATGGGATTGGTATCGACAAATGGGACGAATGCGAGTGCGGCAAGTGGGACAGAGATTTCAGTTTCGTCA
CC_OL_004_E20	CC1G_12670															YOR236W	DFR1	Dihydrofolate reductase, part of the dTTP biosynthetic pathway, involved in folate metabolism, possibly required for mitochondrial function			0	dhfr	TAACGTCGTGGTGAGCCGAAACGAAAATTATGAACTTGAACCAGGCAAAGAGCCATCCCCTATGGCGCGA
CC_OL_004_E21	CC1G_10193																				0	eln3	CTCTCCACTACAAGATTGGTATGATGTCTTATATGTTCTCATATTATGGTATCGCCGCGGCAACGATGGG
CC_OL_004_E22									+												4	topII	TCTGGTTCAGAATCTGACGATTATGCCCCAGTGAAGAAGACGGCCACGAAGGCAACAAAGGCGAAGGCAG
CC_OL_004_E23	CC1G_09782												+		+						8	eln2	CCTCAGTTTACCATGGTTTGCGAACTGTGCAACTGTAAGAATATGGTTGCCTTTACGCCCTACGGAGAAC
CC_OL_004_E24	CC1G_10537															YER081W	SER3	3-phosphoglycerate dehydrogenase, catalyzes the first step in serine and glycine biosynthesis; isozyme of Ser33p			0		AAAAACTGCTACGAAATTCGTGGCAAGACTTTGGGCATCGTCGGTTATGGCCACATCGGCTCCCAACTCT
CC_OL_004_F01	CC1G_02104																				0	cip1	TTCTACCAAGGGTCCAAGTGTGAAAGCCCTGTTCGCAAGATTCTTCGAATTGTTTTCCATGACGCGATCG
CC_OL_004_F02																							CTTCAAATGCCACTTCAAGACATTTATCAAGGTAACCGATGTGATATTTATAAGGTCAACACTCCACCCG
CC_OL_004_F03																						mfs1.2	TCCGATGAGTGGGGGCCTTGCTCAAATCGTAGGTAGAAGAATTGTATTTATCATAGCCCTGGCATCCTCT
CC_OL_004_F04												+									0	coH2	CCAAACTGTTTGCTGCCAGAACAACTACTTCGGTGGGCTCATCTCTATTGGGTGCACTCCCATCATCATC
CC_OL_004_F05	CC1G_05003																				3	cglI	GTCTTGGACCATGGCGACAGGTTCCAAATCCTCTTCGACAACGCGACTGCGATCTACTATACCAAGAGGA
CC_OL_004_F06	CC1G_07121																					acu7	ATCAAACTTGAAAGGGAGGGATCTGCTAAAGACTTATGAAAGCCAGGGTCTCATATGTGGAGCGGTGTAC
CC_OL_004_F07	CC1G_07392																				4	pcc1	GCGTTGTCGAATCCTTGTCCCAAGACCCACCTGCATATGGCGATCCTAACATGAACAATATGGGCCAGTA
CC_OL_004_F08																					0	ich1	AAGATCGGTCTGTGGTTGTTGAGATGGGGGAAAAGGCTTGGAGGGAGAAGTGTCCTGAACTTCTAGAGTC
CC_OL_004_F09	CC1G_15549																				3	clp1	CTCTCATGGCTGTGAACCCAGAGCTTGCCGATACCGATCCTGAATACATTCGCCAGGTGCTTGAATCTCA
CC_OL_004_F10	CC1G_05972																					lcc4	ATGGACACTCCTTCTCTGTCGTCAAAAGCGCGGGAAGCCAAACCTACAATTTCGACAATCCTGTTCGACG
CC_OL_004_F11											+											hyt1	GGTCCCAAAACTAATTTTATCCCGAGCGCGAGATCATCGGGTTCCCCACCTATTCGCCCACCCCAACACA
CC_OL_004_F12																					0	bad42	CGCTTGGATGCGATGCAAGCGTTCAACCAAACCCATTCGCAAGCACTTCAGACCCAGATTCGGGAAATTC
CC_OL_004_F13	CC1G_01942															YPL120W	VPS30	Subunit of phosphatidylinositol (PtdIns) 3-kinase complexes I and II; Complex I is essential in autophagy and Complex II is required for vacuolar protein sorting; ortholog of the higher eukaryotic gene Beclin 1			0		CCGTGAAGCTGCAGTTCAACCAAGAGGAAGCGTGGACAAAGTCATTACGACATGTACTTCTGGCGCTCAA
CC_OL_004_F14	CC1G_05145															YLR212C	TUB4	Gamma-tubulin, involved in nucleating microtubules from both the cytoplasmic and nuclear faces of the spindle pole body			3	gamma tubulin	TGAACATCATCCAAGGCGAAGTTGATCCTACAGACGTCCACCAATCCCTGCTGCGGATCCGAGAACGACA
CC_OL_004_F15													+									rad9	CCTTCACTATTAAGCAAGGCCTAGCACATACTCTCCAATCGTTCCCGGTTATCATCGCTCTGGAGACCAG
CC_OL_004_F16	CC1G_14981		+				+		+													msh5	TCTCGTAGCCACCCACTTTCACGAAGTATTCACGCGCGATCTCCTCGACGTTGAGAATCTCCCAATTACT
CC_OL_004_F17	CC1G_05127												+		+						7	rad21.1	CTTAACAGAACTTCCAGATACCCCAGCTGCAGATGACAATCCCCTGCCGGATACCAACGTTGAACCGAAA
CC_OL_004_F18	CC1G_03652																				4	rad21.2	ACAGTCGCCAACCCGCCACTCAAACTCAGACGCAAGAGGAATCTGAAGTCGTTGAAACTCAGGAAGTAGT
CC_OL_004_F19	CC1G_02138																					phb3.3_B43	TCGATACGGACTCGTCTAGTTTTGACGAGTGTCTTCTTGAGTTTAGACTGGCAGTGAGCTCCGACGAAAG
CC_OL_004_F20	CC1G_07736															YML032C	RAD52	Protein that stimulates strand exchange by facilitating Rad51p binding to single-stranded DNA; anneals complementary single-stranded DNA; involved in the repair of double-strand breaks in DNA during vegetative growth and meiosis			0		AAATCCGATAACAGGCGGGTTTCGTTTGCAAAAGCCCCCGCTCCTCCACCTAATGGCAATAGTTCAGTGA
CC_OL_004_F21	CC1G_13915															YLR045C	STU2	Microtubule-associated protein (MAP) of the XMAP215/Dis1 family; regulates microtubule dynamics during spindle orientation and metaphase chromosome alignment; interacts with spindle pole body component Spc72p			4		AATCAACAGGTCCAGTGTTTAGGAAGTACATCAATCGTGCATTGGCAAGCCGTGCCGCCGAAGACCAAGA
CC_OL_004_F22	CC1G_04228															YBL063W	KIP1	Kinesin-related motor protein required for mitotic spindle assembly and chromosome segregation; functionally redundant with Cin8p			0		AGGAAATGAGGTCGTCTATCCCTGTCGAAACATTGGCAGAATCGAGGAAACGTAACGTGTCGACTCGGTC
CC_OL_004_F23	CC1G_13948																				0		GCACTGCCGACTGGAAAGGAGATTCCAGAAGAGTTTAAGCAAAGGTGGTTGTCGATCCACGAAGAGTGTG
CC_OL_004_F24	CC1G_03801															YIL046W	MET30	F-box protein containing five copies of the WD40 motif, controls cell cycle function, sulfur metabolism, and methionine biosynthesis as part of the ubiquitin ligase complex; interacts with and regulates Met4p, localizes within the nucleus			0		GACCGGTCATACGGAAGGAGTAGTGTGTCTAAACTTTGATTCGAACGTGTTGGCGAGTGGGAGTGTGGAT
CC_OL_004_G01	CC1G_03820															YBL078C	ATG8	Component of autophagosomes and Cvt vesicles; undergoes conjugation to phosphatidylethanolamine (PE); Atg8p-PE is anchored to membranes, is involved in phagophore expansion, and may mediate membrane fusion during autophagosome formation			0		GACCGATATCCCTACTATCGACAAGAAGAAGTACCTGGTGCCATCTGACCTCACGGTTGGACAATTCGTG
CC_OL_004_G02	CC1G_15424															YPL150W		Putative protein kinase of unknown cellular role			0		CATGAGCTCCCCCGATCGCATCCTTCAACACCAGGAAGCAGCATGAAAGAAAGCAAAGGTAGAAAGAACC
CC_OL_004_G03	CC1G_15440	+														YHR172W	SPC97	Component of the microtubule-nucleating Tub4p (gamma-tubulin) complex; interacts with Spc110p at the spindle pole body (SPB) inner plaque and with Spc72p at the SPB outer plaque			0		GCCAAGAAGGAGAAGGAGGAGAAGAAATCGATGCAAGCCATCGACGCTCTGACATTGGATTACACAGTCA
CC_OL_004_G04	CC1G_07999	+													+	YLR197W	NOP56	Essential evolutionarily-conserved nucleolar protein component of the box C/D snoRNP complexes that direct 2'-O-methylation of pre-rRNA during its maturation; overexpression causes spindle orientation defects			4		TTGTTCAGGGCGTTGAAGACTAAGGGCAACACTCCCAAGTATGGTCTCCTCTACCACTCGTCCTTCATTG
CC_OL_004_G05	CC1G_07078															YGR188C	BUB1	Protein kinase that forms a complex with Mad1p and Bub3p that is crucial in the checkpoint mechanism required to prevent cell cycle progression into anaphase in the presence of spindle damage, associates with centromere DNA via Skp1p			0		GAAAACAATCGGTTTATGTTGTCCGAAAAGCTGGGTGAAGGAGGCTTTGGATCCGTGTACAAGGCTCGGG
CC_OL_004_G06	CC1G_00343															YNL126W	SPC98	Component of the microtubule-nucleating Tub4p (gamma-tubulin) complex; interacts with Spc110p at the spindle pole body (SPB) inner plaque and with Spc72p at the SPB outer plaque			0		GGTTGGGATGTCTTCACTTTGGAATATAAAGTTGACACGCCTATCGACACCGTCTTGGACGACCGGGCCA
CC_OL_004_G07	CC1G_03629															YLR175W	CBF5	Pseudouridine synthase catalytic subunit of box H/ACA small nucleolar ribonucleoprotein particles (snoRNPs), acts on both large and small rRNAs and on snRNA U2			1		ATGGCCAACTCGGAAAGCACGGTGAAAAGATTGAGGGTGTTACTCCTGCAGAATGGAGTCGCGACTACAA
CC_OL_004_G08	CC1G_03036															YER016W	BIM1	Microtubule-binding protein that together with Kar9p makes up the cortical microtubule capture site and delays the exit from mitosis when the spindle is oriented abnormally			0		CTCCAGAACCAAGTCTCAGAACTCACAGGACAACTAGAGGGCCTCGAGAAGGAACGCGACTTTTATTTCG
CC_OL_004_G09	CC1G_07350															YMR055C	BUB2	Mitotic exit network regulator, forms GTPase-activating Bfa1p-Bub2p complex that binds Tem1p and spindle pole bodies, blocks cell cycle progression before anaphase in response to spindle and kinetochore damage			0		AGGCATTCTTTTGCTTTGCCAAGTTCATCGAAGAGGCCTGTCCCCTGTATGTTCAACCGACTCTGGAAGG
CC_OL_004_G10	CC1G_09388																				0		TTGGGTTTAGTTGTGATGGAGGCAAGTTGGCTATTGGTGAGTTTTTCTTTCCGTTTCTCTCTTCGATTTG
CC_OL_004_G11	CC1G_02554	+														YEL040W	UTR2	Cell wall protein that functions in the transfer of chitin to beta(1-6)glucan; putative chitin transglycosidase; glycosylphosphatidylinositol (GPI)-anchored protein localized to the bud neck; has a role in cell wall maintenance			1		CGTGCAAGCCTAATCCTATCTGCCAATCCAATACTTATACCTTTGGCGACACTTCTCGTATCGTCGATGT
CC_OL_004_G12	CC1G_04183															YDL143W	CCT4	Subunit of the cytosolic chaperonin Cct ring complex, related to Tcp1p, required for the assembly of actin and tubulins in vivo			4		ACCTTGTCGTCGAAGAAAGCGAGCGAAGTATCCACGATGCTCTCTGTGTTGTCCGTTGCTTGGTGAAGAA
CC_OL_004_G13	CC1G_05204	+													+	YGR245C	SDA1	Highly conserved nuclear protein required for actin cytoskeleton organization and passage through Start, plays a critical role in G1 events, binds Nap1p, also involved in 60S ribosome biogenesis			4		TCTCAGAGCAAGATATCCTGGGTCCACGCAAAAAGGCCAAAGCAGACTACGAAGAACGTATGGCCTCCAT
CC_OL_004_G14	CC1G_05083	+													+	YGR080W	TWF1	Twinfilin, highly conserved actin monomer-sequestering protein involved in regulation of the cortical actin cytoskeleton, composed of two cofilin-like regions, localizes actin monomers to sites of rapid filament assembly			3		GAGTTGGCCCGAGATGAAGGCTCTGGCATCGTCATACTGTCTATTGATACCCAATCGGAGACTCTTAAGC
CC_OL_004_G15	CC1G_03801															YIL046W	MET30	F-box protein containing five copies of the WD40 motif, controls cell cycle function, sulfur metabolism, and methionine biosynthesis as part of the ubiquitin ligase complex; interacts with and regulates Met4p, localizes within the nucleus					GACCGGTCATACGGAAGGAGTAGTGTGTCTAAACTTTGATTCGAACGTGTTGGCGAGTGGGAGTGTGGAT
CC_OL_004_G16	CC1G_12191	+														YNL059C	ARP5	Nuclear actin-related protein involved in chromatin remodeling, component of chromatin-remodeling enzyme complexes			0		TGAGGAGTACTGAGAATAAACGGGATTGGGCTGCCAGACTAGAAGATGAGGGCTTCGATAATGATGCTGC
CC_OL_004_G17	CC1G_12191															YNL059C	ARP5	Nuclear actin-related protein involved in chromatin remodeling, component of chromatin-remodeling enzyme complexes					TGAGGAGTACTGAGAATAAACGGGATTGGGCTGCCAGACTAGAAGATGAGGGCTTCGATAATGATGCTGC
CC_OL_004_G18	CC1G_02156															YGR078C	PAC10	Part of the heteromeric co-chaperone GimC/prefoldin complex, which promotes efficient protein folding			4		TCTCTGAGGAGAAGAATCCACGAGGGATCCCTAAAGCTCCGTTTATCGCCGACGTAGAAGAATACCTAGG
CC_OL_004_G19	CC1G_06473															YOR181W	LAS17	Actin assembly factor, activates the Arp2/3 protein complex that nucleates branched actin filaments; localizes with the Arp2/3 complex to actin patches; homolog of the human Wiskott-Aldrich syndrome protein (WASP)			0		GCCTCAGAAGCAGAAGAAATCCAAGGTCGCAAAGGGTGGCAAGATCGACAAGTCAATGATTTCAGGACCC
CC_OL_004_G20	CC1G_06498																						GTCAGCACTTCCTGCCTATCGAGATATCCTCCCTTTACTCCCATTCCTGGATAGCCACCATATCACAGCT
CC_OL_004_G21	CC1G_08002															YLR085C	ARP6	Actin-related protein that binds nucleosomes; a component of the SWR1 complex, which exchanges histone variant H2AZ (Htz1p) for chromatin-bound histone H2A			4		TATCTTTCGACCAGATGACATAGGCCTTCAACAGGCGGGTTTAGCGGAAACGATCGCCCATTCGATATCG
CC_OL_004_G22	CC1G_03395												+		+	YLL050C	COF1	Cofilin, promotes actin filament depolarization in a pH-dependent manner; binds both actin monomers and filaments and severs filaments; thought to be regulated by phosphorylation at SER4; ubiquitous and essential in eukaryotes					GTTCGTTGCAAGGTGTAGCTGTCGAGATTCAGGGCACGGATTACGATGAGATCGCGTATGATTCCGTTCT
CC_OL_004_G23	CC1G_11699																				0		AAAGGTCGTCGATCCTCCACCACTCGATGTCAAGAAACTTTACCGTGTAACTCTTACCCGCACCCACGAT
CC_OL_004_G24	CC1G_10952																				0		ATCCTTAACAACCCAAATCCACCTACGGCTAAATCTGAAAGAGCGAAAGCAAATGCGGGGAAGGCGCCTG
CC_OL_004_H01	CC1G_00100																				1		GTCGCTGCAGTGTCAGAACAAGGTTGGAATGACCAACTAATGGCGAGGTCGCTACCGAAGCAATACGAAT
CC_OL_004_H02	CC1G_00182															YDR486C	VPS60	Cytoplasmic and vacuolar membrane protein involved in late endosome to vacuole transport; required for normal filament maturation during pseudohyphal growth; may function in targeting cargo proteins for degradation; interacts with Vta1p			0		AATCTTTCAATATGGAGTCTGCTGCGCTCACGACAGAGAACTTGAGGAACACGATGGCGACTGTCTCTGC
CC_OL_004_H03	CC1G_00329															YMR093W	UTP15	Nucleolar protein, component of the small subunit (SSU) processome containing the U3 snoRNA that is involved in processing of pre-18S rRNA			3		GCGTTGAAGGATGTTGATGAACTCCGTGTGAGCGAGAGTCGTCGACAGAAGCGCCTGAAAAACTATGACA
CC_OL_004_H04	CC1G_00289	+														YPL242C	IQG1	Essential protein required for determination of budding pattern, promotes localization of axial markers Bud4p and Cdc12p and functionally interacts with Sec3p, localizes to the contractile ring during anaphase, member of the IQGAP family			3		AAGCGATTTGTCTTGCCGTTTACCAAGCAATTCTACCATCTTCGGGAGTTACAGAGGACGGGGCAAACCC
CC_OL_004_H05	CC1G_10757												+			YCR011C	ADP1	Putative ATP-dependent permease of the ABC transporter family of proteins			0		TCGGCTATTGGTCTTGCGGTCATTTGCGGTTTGTTCTTCCACAATGTGACCAACGATATCGCTGGATTCC
CC_OL_004_H06	CC1G_06718																				1		ATCCAGAGCTTATTGGGCAGGAATATGCGGGCGTCCATCAAGTAGTCGTGGACTCTATCAACAGAGTCGA
CC_OL_004_H07	CC1G_01715															YLR200W	YKE2	Subunit of the heterohexameric Gim/prefoldin protein complex involved in the folding of alpha-tubulin, beta-tubulin, and actin			3		ATTAGAGGCACAGTTATCGGAGAACGAGCTGGTGAAAAAGGAATTCGCGTCCCTGACGCCGGAAAACACT
CC_OL_004_H08	CC1G_03801															YIL046W	MET30	F-box protein containing five copies of the WD40 motif, controls cell cycle function, sulfur metabolism, and methionine biosynthesis as part of the ubiquitin ligase complex; interacts with and regulates Met4p, localizes within the nucleus					GACCGGTCATACGGAAGGAGTAGTGTGTCTAAACTTTGATTCGAACGTGTTGGCGAGTGGGAGTGTGGAT
CC_OL_004_H09	CC1G_13048																				0		ATTATCTTCGAGACGTTTAATGCGCCTGCGTTCCATGTGGCCATTCAAGCCGTGTTGTCGCTCTATGCCT
CC_OL_004_H10	CC1G_13050																						TTCGTGGGTTCGCTTGCAGTAGGCAAGAGTACGATGAGATGGGGCCTATCGTCGTTAACCGCAAACAGTG
CC_OL_004_H11	CC1G_10983															YDR129C	SAC6	Fimbrin, actin-bundling protein; cooperates with Scp1p (calponin/transgelin) in the organization and maintenance of the actin cytoskeleton					ATATCGTCGATGGCCGTAAGACGCTTGTGTTGGGTCTCGTGTGGCAGTTGATGCGATTGAACATCGTCAA
CC_OL_004_H12	CC1G_15084																				0		GACGATGTCCAGACCCTCGCCAAGCGATCCCAGAAGCTGTTCATCTTCGCAGCAACGCTGATCAACTATC
CC_OL_004_H13	CC1G_03127																				0		AACGCACCTCAAAGTGCCACTGTTCCCCAGACCAACGAGGGAGGCCAGGTTGTCATCGGGGGCGCCCTAT
CC_OL_004_H14	CC1G_01975															YJL080C	SCP160	Essential RNA-binding G protein effector of mating response pathway, mainly associated with nuclear envelope and ER, interacts in mRNA-dependent manner with translating ribosomes via multiple KH domains, similar to vertebrate vigilins			0		TACTGTCGGACGCGAGAACAACACCATCGTCATCGTTGGATCCGAAACCGAGATCAATGACGCCAAAACA
CC_OL_004_H15	CC1G_02289																						TTACTCTCCAACAAGCAGCATTCCGTCGCGCGGCTCTTCCGATAGCGGGAGGCATACACCAAACGGTGAT
CC_OL_004_H16	CC1G_01914															YKL013C	ARC19	Subunit of the ARP2/3 complex, which is required for the motility and integrity of cortical actin patches					CGACGTAAGCCTGTACCAGGCTACGACATCTCATTCTTGATTACGAACACCCACACTGAAACGATGTTGA
CC_OL_004_H17	CC1G_01912																				5		GCAATTTAGAAAGGGAAATAACAATACTCCGTACTATCTCAACATTGCCACCAAAACCCCTCAGCGAGAA
CC_OL_004_H18	CC1G_06855															YLR083C	EMP70	Protein with a role in cellular adhesion and filamentous growth; similar to Tmn2p and Tmn3p; member of Transmembrane Nine family of proteins with 9 transmembrane segments; 24kDa cleavage product found in endosome-enriched membrane fractions			0		CCGCTATCCTCAGTGGGATTCTTCCTTTTGGTGCTGCATTCGTCGAACTCTACTTCGTCTTGTCGAGTCT
CC_OL_004_H19	CC1G_04040															YLR429W	CRN1	Coronin, cortical actin cytoskeletal component that associates with the Arp2p/Arp3p complex to regulate its activity; plays a role in regulation of actin patch assembly			0		TCAATCTATTAGCAATAGTGGTGCCGAGGCTGCTTTGAGAGAAGAGAACGCTCGCCTTACAACCGAGCTC
CC_OL_004_H20	CC1G_12158																				0		GTTGTTCCAGATGTACCCTCATTCCATCTGCATCAACATGAAAGATGGTTGGATTCGCAATGCAGCCGGA
CC_OL_004_H21	CC1G_00895															YOR141C	ARP8	Nuclear actin-related protein involved in chromatin remodeling, component of chromatin-remodeling enzyme complexes			3		TCTAAACCACCTGCGGGGAATGGAACTACCGAAGCACCGATTGAAATCATCGATGTCGATGACGACACCA
CC_OL_004_H22	CC1G_00933	+						+				+				YLR319C	BUD6	Actin- and formin-interacting protein, involved in actin cable nucleation and polarized cell growth; isolated as bipolar budding mutant; potential Cdc28p substrate			0		ATTCGGCAGAAGAAGAATGAGATGACACTCAAGGCGATGTTCAACCCGAGCACTCCAACGTTGTCGATGG
CC_OL_004_H23	CC1G_00792															YOR239W	ABP140	Nonessential protein that binds actin filaments and localizes to actin patches and cables, has similarity to S-adenosylmethionine (AdoMet)-dependent methyltransferases			4		GTCGTAATGCGTGACTATGGGCGCTACGACCTTACTCAACTTAGATTCAAAGGAGGGAGACTTCTAGAGG
CC_OL_004_H24	CC1G_00968															YOR123C	LEO1	Component of the Paf1 complex, which associates with RNA polymerase II and is involved in histone methylation; plays a role in regulating Ty1 transposition			4		TCTGGGTATAGCAAGAAGAAGCGACGCTTCGGGAATGACTACGAGGAAGATCCCTTGGACAAACTCGATG
CC_OL_004_I01	CC1G_14822															YOL071W	EMI5	Non-essential protein of unknown function required for transcriptional induction of the early meiotic-specific transcription factor IME1, also required for sporulation; null mutant excretes excess acetic acid					GTTGAAGGAATTTGACAAGCTTCTTGACGAGCCGGATTGGGACATCTACTATTGGTGCACTGGGAAGAGG
CC_OL_004_I02	CC1G_09333																				5		CAGTCGCTCAAAACTCAGGCGGAAGAGCTCCGGTCGACTATCATGGCAGAGCAAGAGGCGCGACCTGACT
CC_OL_004_I03	CC1G_13700																				3		GCAAATCATCGTTATGTACCTTTCGTATCAAGTTGCACGATTACGCCGGTTCTTGGATGGCGATCGTGTA
CC_OL_004_I04	CC1G_00168																						GCCGAACTTGTGTCAGAGGTCGCACAAAAGGTGAAATCGGGAAAGCCAGGATTAACACGGACGATTAGTC
CC_OL_004_I05	CC1G_09015		+		+				+				+			YOR259C	RPT4	One of six ATPases of the 19S regulatory particle of the 26S proteasome involved in the degradation of ubiquitinated substrates; required for spindle pole body duplication; localized mainly to the nucleus throughout the cell cycle			4		AATGTTCGCCATCCGGGACGACAGAGAGTACATCATCCAGGAAGACTTAATCAAGGCGGCGAGAAAGGTT
CC_OL_004_I06	CC1G_12481												+								0		CTCAAGATGTTCTTGGTTGCCGTGGACATGATTGAACGCGACCTTGACTCGCCTCAGACTACACCGCCGA
CC_OL_004_I07	CC1G_00318																						CGGTCTCCAGAACCTTCTGTATGAGAAACGTCATCTTGAGCGCGAAATCGAAAAGTGTCGCCAATTTGCC
CC_OL_004_I08	CC1G_01933																				4		TTCTCAAGCAACAAGTAGAGTTGGATGCCCGCAAGTCTATACAGATGACAATCACAGGGGCCTCGGAAGC
CC_OL_004_I09	CC1G_06780																				0		CATTACGCTCAGGCCTACCTACAGCAATTCCCCGAGGCCCAACCGTCCACAAGTAACTACTATGCGCAAC
CC_OL_004_I10	CC1G_05207																				0		GCCCAAGGAAATAAGAGAGCAATGAATCGGTTGACAGAGATGAAGCGGATGGGCAATAAGCGCCCTGCTA
CC_OL_004_I11	CC1G_06716																				0		TGGAAAAGCTCGTTGAAGAGGAGGATTGGCCGGCTGCTAAATTGGGTGCTATCAGGCTACGATACCTTCA
CC_OL_004_I12	CC1G_12185														+	YJL154C	VPS35	Endosomal subunit of membrane-associated retromer complex required for retrograde transport; receptor that recognizes retrieval signals on cargo proteins, forms subcomplex with Vps26p and Vps29p that selects cargo proteins for retrieval			0		TGGTGAACCCGGTATTGATCCTAGATGGGACGATGTCGATGTCGTGGGTGCTGTTTTGAAGATGGGCATT
CC_OL_004_I13	CC1G_01733												+			YIL067C		Uncharacterized protein of unknown function			0		AGATCCCACCCTCCCCCATTTCTTCCGTCTTGCGTACAAATCGGATATCACCCTTGGAGACTACACAAAG
CC_OL_004_I14	CC1G_01728														+								CGCAAGGCCATGGAGATTCAATACCTCGAGCAGGAGCAAGACGAGAATCAAGAACAAATCAGGCAGCTGA
CC_OL_004_I15	CC1G_12850																				0		AGTACTCCTAGGCAGGGGTGGACCAAACAGGTGTATGGAAATGGGCTTGTCGAAACTTTCTCTGGCCAAG
CC_OL_004_I16	CC1G_07520																				0		TTCGGAAACTGGCAATAAGCGTTGGGCGAACCGATACTGAAGACTACTGTGGACTCGCAGACCGTGCTTG
CC_OL_004_I17	CC1G_14411																				8		GCTTCGACCTCTATGCGACCGTTTTCTACTTTGACTGTACCCAATATTACCCCAAGCCTGGTGGTGGAGA
CC_OL_004_I18	CC1G_03267																				0		GTGCTTACCCAGATCTCTTTGCTGCTGGTTCTGCCTTTGCTGGTGTCCCATATGCCTGCTTCGCTGGTCC
CC_OL_004_I19	CC1G_12159																						TGATTGGCAATGGATATACCCACCCGAACACTATGGTCGAGTCCTACTACGATATGGCCTGCACTGTGAC
CC_OL_004_I20	CC1G_00481															YCR042C	TAF2	TFIID subunit (150 kDa), involved in RNA polymerase II transcription initiation			0		GCCCGTTGACCCCATCCGCGACCATGCCCCCAATTACTTTGACATCATCAAAGAACCTATGGATCTTAGT
CC_OL_004_I21	CC1G_04434																				0		AAGCAACAAAACGGATACGACTGTGGAGTGTTCACATGTCAAACGCTGGAGTCTCTCTCCCGAGGCGAAA
CC_OL_004_I22	CC1G_07779															YHR132C	ECM14	Putative metalloprotease with similarity to the zinc carboxypeptidase family, required for normal cell wall assembly					TCAAACCTGTCGGGGAGGAAACCTCGTCCATGATCGAATATCTTGCCAAATTCATCGTCTCGCACCGCAA
CC_OL_004_I23	CC1G_07792																						AGATGCAAGCCAAGATTCAGAACCTTGCTGTTAAAGGAGCTATCAGCGGTCTCCCATCCGGTACTGCCAA
CC_OL_004_I24	CC1G_01316																				0		ATTTCTACCGAACTCTGACGAGGCTAGTCGGGGAGGACCAACCGTTATATGAACAGGAAGACCAGCATAC
CC_OL_004_J01	CC1G_01263																						AAGCCATGGATACCTATGATCCTGTACGCCCTTACTAGCTTCGCTTTTGTCGTTGCGATCGCCCTCTACA
CC_OL_004_J02	CC1G_01435											+		+									TTCAGCGATTATTTCAGACGACCTAACTACCAAAACAGAGTCGTCCCTGCGTTCCTCGAGTCTGTCCCGT
CC_OL_004_J03	CC1G_00215															YHR113W		Cytoplasmic aspartyl aminopeptidase; cleaves unblocked N-terminal acidic amino acid residues from peptide substrates; forms a 12 subunit homo-oligomeric complex; M18 metalloprotease family member; may interact with ribosomes			4		AGTCAATTGCCCGTTCATTCCTCATCTCCGCTGACATGGGTCATGCGATCCATCCCAACTACACTTCGAA
CC_OL_004_J04	CC1G_00193															YJR126C	VPS70	Protein of unknown function involved in vacuolar protein sorting			0		TCGTTCAAGTTTGGCGCTTCGTGAAGTACCAGATGTCTCGTGCCTTTGGGTTTATCACTGGACCGGAAAC
CC_OL_004_J05	CC1G_02379																						ATATCGTCACCACAGATAGAGGCCAAAACGAATGTGCTTTCAGTCATGGAGGAACGTCAGCAGCTGCACC
CC_OL_004_J06	CC1G_02285																				0		GATTACTTGCCTCGCAACAATGATAATCCATACGACTATGGCTACAACGCCCTTGCATGGGTCCAGCCGA
CC_OL_004_J07	CC1G_02257																				0		TTATTGCTACGAATAGGACCGCTGAGGGCGGATGGCTTTCAGATGAGACGATTGCTGCCCAGATAGATGT
CC_OL_004_J08	CC1G_10898																				0		GCCGCTTTCCCATTCCTTTCGATTGTCCTTCCACCACTGAAGGGCGATACAGTTAACCTACAAACAGGTC
CC_OL_004_J09	CC1G_09936												+										TTTATTGCTGCAACCGAGTACCTCCACAAGAATAAAATCGCCGCTCCAGGCAAGGTCACGATCAACGGTG
CC_OL_004_J10	CC1G_09180															YMR297W	PRC1	Vacuolar carboxypeptidase Y (proteinase C), broad-specificity C-terminal exopeptidase involved in non-specific protein degradation in the vacuole; member of the serine carboxypeptidase family					CTCCCCGAGCTGGTCAACGATGGTATTCGACTCTTGGTATACGCCGGGAATGCAGATTTGATGTGCAATT
CC_OL_004_J11	CC1G_05324												+		+	YHR027C	RPN1	Non-ATPase base subunit of the 19S regulatory particle of the 26S proteasome; may participate in the recognition of several ligands of the proteasome; contains a leucine-rich repeat (LRR) domain, a site for protein?protein interactions			4		CCTGTGCGGATGGGTATTACGGAGAGAGCAGAGTTGGCTACTGAGGAGTATATTCCGTTTGCGCATGTTT
CC_OL_004_J12																					0		CGCCTATCGGTGGCTTGATGACTCGGGAAGTGAATGCGATAATGAATAGAGAAACAGCCCTCACTTACGC
CC_OL_004_J13	CC1G_08798															YOR197W	MCA1	Putative cysteine protease similar to mammalian caspases; involved in regulation of apoptosis upon hydrogen peroxide treatment; proposed to be involved in cell cycle progression			0		AAGCTATCTGCCCTGTTGACTTTGATAGTGCTGGCCTGATCGTGGATGATCAACTCCATGACCTCCTCGT
CC_OL_004_J14	CC1G_08776																				0		AACTCTTGTTGTCGATCCGAGAAATCATGGTGGACGAATATGCTCAGAAGCCCCAGGCAAGTCCTTCGCT
CC_OL_004_J15	CC1G_12248																				8		ATCCGTCATCCCGACTATCGAAGAAGCACTCGACGGCAAATATAATGGACATCCCACTCGTCTCGAGTAC
CC_OL_004_J16	CC1G_05359																				0		AGTACCCCTACTCGATTAATGCCTCGACCAATCCCTTGACCTATGGTGCTGGAAAGAACACGGATCCAGA
CC_OL_004_J17																							AGGACCAGCGAGAGAAGCAACTCTCCATTAGAGGGCACCAACCCACACGGCTGAAGCAGCAACTAGATGA
CC_OL_004_J18	CC1G_02656																				6		TTGTCAAGAAGCGATACCTGGCCAAGACTGAAAGTGTTTACTTCAACTTGATGGCCCTCGCCCCACCCTT
CC_OL_004_J19	CC1G_02645															YKR087C	OMA1	Metalloendopeptidase of the mitochondrial inner membrane, involved in turnover of membrane-embedded proteins; member of a family of predicted membrane-bound metallopeptidases in prokaryotes and higher eukaryotes			0		ATTCTGACTTTGGTGCTGCAACCCAGCCAAACGAATCCTACGGCCCAGAGAAGGAATGGGATGTCATTGT
CC_OL_004_J20	CC1G_14314																				0		CGTATCCAAGATCGAGACCCCACTGCTTATTCTTCAAGGATCTGCAGACAAAGTTGTCCCACCCGCTCAA
CC_OL_004_J21	CC1G_03439															YIL031W	ULP2	Peptidase that deconjugates Smt3/SUMO-1 peptides from proteins, plays a role in chromosome cohesion at centromeric regions and recovery from checkpoint arrest induced by DNA damage or DNA replication defects; potential Cdc28p substrate			4		GTTGCTCCAACCAAGAAGAAATCGGCACCAGTTCCTTCAACAGTCACGACACGAGCACAAAGGTTACGCT
CC_OL_004_J22	CC1G_03366																				0		CACGTTCCTTCCAATCCATGCTGCCGGCAATTACCCTTCCCCTCCTTCCTCAGAATCCGACTGCTTATCC
CC_OL_004_J23	CC1G_03408																				0		TGCTAGGACCACGGACGACTACCGTGAAGAAGCGATGAATTATTTGATGGAAGTCACTTTGGCCAACCCC
CC_OL_004_J24	CC1G_03454												+			YCL057W	PRD1	Zinc metalloendopeptidase, found in the cytoplasm and intermembrane space of mitochondria; with Cym1p, involved in degradation of mitochondrial proteins and of presequence peptides cleaved from imported proteins					TACGATGCCGGCTACTACGGATACACCTACTCATTGGTCTTCGCCGCCGATATGTATGCTACTGTGTTCA
CC_OL_004_K01	CC1G_04928																				9		GGCTCAAGGCAAGACTTGATTATGGGGAAGAAATCTTGGGGCATCTGGACGCATTTGGTCTGGTCGAAGA
CC_OL_004_K02	CC1G_14879																				0		CCCTGCTGCACGAGGTGTGCATACGGTTAACGAACATATTGAAGCCGACGTGTTTGTCGAGATGATTCGT
CC_OL_004_K03	CC1G_05499															YLL029W	FRA1	Protein involved in negative regulation of transcription of iron regulon; forms an iron independent complex with Fra2p, Grx3p, and Grx4p; cytosolic; mutant fails to repress transcription of iron regulon and is defective in spore formation			3		AAACAGGGATTGCCCGATGTACCAACATGGCAAGACTTCCTGCACAAGCCATATCAGACCCTCGATGGAT
CC_OL_004_K04	CC1G_11771																				0		CTTTGGAAAGGGTGGACGAGGGAACGATCGAGTGACTGTTAGTGTTCAGGATAGCTCTGGTACGAACAAC
CC_OL_004_K05	CC1G_04273															YLR244C	MAP1	Methionine aminopeptidase, catalyzes the cotranslational removal of N-terminal methionine from nascent polypeptides; function is partially redundant with that of Map2p			0		TGGGAACTATGAAGCCTGGGATGACCTTCTCCATCGAGCCGATGATTAATCTCGGCAACAACTGGGCTGA
CC_OL_004_K06	CC1G_12012															YNL238W	KEX2	Subtilisin-like protease (proprotein convertase), a calcium-dependent serine protease involved in the activation of proproteins of the secretory pathway			0		GGTCAACTTGGGTATCATTCAGGCTTTTTGGACGATGGAGAACCGTCTGTAGGTCCGACGGCAACTACAT
CC_OL_004_K07	CC1G_13721														+	YBL091C	MAP2	Methionine aminopeptidase, catalyzes the cotranslational removal of N-terminal methionine from nascent polypeptides; function is partially redundant with that of Map1p					TCTATGACTGCACAGTTTGAACACACGATTCTATTGCGCCCGACGTGCAAGGAAATTGTGACGCGTGGAG
CC_OL_004_K08	CC1G_06569															YHR024C	MAS2	Larger subunit of the mitochondrial processing protease (MPP), essential processing enzyme that cleaves the N-terminal targeting sequences from mitochondrially imported proteins			0		AAGTATTTCTCGGGTCTCAAAGCACCAACACAGCCCTCAGCACCACGAACAAGTTCCCAGCCTTCACAAA
CC_OL_004_K09	CC1G_04591															YBR074W		Putative metalloprotease			4		ATCAAACTTTAACTGACGGCAACAGTGCCTGGAGTATCTATCTCCTGACGGCCCTTCTCGCTACCATGCT
CC_OL_004_K10	CC1G_06342	+													+						3		TCGAGGATACAAGAACCTCCATCTACCAGCGCGATTCGGCCGTCACCTATCAGCTCAAAATGAAGAACTC
CC_OL_004_K11	CC1G_03653																				0		GTATGGCTTGATCTCGCAGACCGAATTGGAGGAAAACACCGCAAAGGGCCTCAGATTGATCAGTCTTCAG
CC_OL_004_K12	CC1G_10606						+														0		TATGGTCCGGGCATTGACATCTTTGCTCCAGGTCAATCAGTTTACAGTGCTTGGCACACAAGCGATACGG
CC_OL_004_K13	CC1G_10592																				0		CCACTCCCCACGTCGCTGGCTTGGTTGCCTACCTCATTGGTCGTGACGGAAACGTCAGCCCTGCCGCCAT
CC_OL_004_K14	CC1G_10615		+								+										0		AGTCCTCAACAGGTCTGGCTCTGGTGCTACTTCCGGAATTGTCTCTGGTCTCCAATGGGTTTTGAACCAA
CC_OL_004_K15	CC1G_10624								+												0		CTGTTTCCAAAGTGGACCCCGAAAGCGTTGCATTGAATCCTGCATGGAGACGCGCTGCAGCTCAACTATA
CC_OL_004_K16	CC1G_05797															YNL223W	ATG4	Conserved cysteine protease required for autophagy; cleaves Atg8p to a form required for autophagosome and Cvt vesicle generation			0		GCGAACGCGCTCATTCATGTCCATCTTGGTCGAGATTGGAGAAAGCCACCTTATCCAGTTATGACTGCAG
CC_OL_004_K17	CC1G_05835															YNL202W	SPS19	Peroxisomal 2,4-dienoyl-CoA reductase, auxiliary enzyme of fatty acid beta-oxidation; homodimeric enzyme required for growth and sporulation on petroselineate medium; expression induced during late sporulation and in the presence of oleate					ATGGAGATTGACACGATTGGCACGTACAACACCATCAAGGCAACCATCGCTCACGTCCGTGCGGCAAAGG
CC_OL_004_K18	CC1G_01969	+																			0		TGCCTCGTCTGGCTCCATCAAGGCTGGTCGTGTTTATGTTACTAGCCAAAATCATCAGTACGCCCTCAAG
CC_OL_004_K19	CC1G_02037																				3		ACGCGAACTTCAAGCAGCAGGAACCTTGCCCAAATATGACCTTTATGACAAGCGGACGGACATCCCTGTT
CC_OL_004_K20	CC1G_02047																				1		GCTCGGATAAATACCTATCCAATGGGAGCTCTCGAATTCAGCCTTTTGGCTTTGCACGATGACCCCCTTC
CC_OL_004_K21	CC1G_05911												+								0		GGGGGAGGGAATGATCAATCTAAACCTGGTGTCGAGGCGAACCTCGATGTGCAATATACAACCGCGATGT
CC_OL_004_K22	CC1G_05882																				0		TAACTACGAAGCAGCACGGAACGCTGAGGCCACCTACGTTGAAAACGTGAAACAATGGGCTCAAGATGAC
CC_OL_004_K23	CC1G_05897																				0		TGGTTTTCCGGAAGACGATAACGGACTTGTGGTCGGTCTGAAGGTGTATACTCACAAAGTTGCTCCGACG
CC_OL_004_K24	CC1G_05906																				0		TTACCACTGAGACGAAGACTGTTGTCGTGAAATCTGCGAAGCCCAAGGCTGCGGAGGATAAGGATAGCAA
CC_OL_004_L01	CC1G_05917																				0		AAAACCCCGATGCCCCAATCGTAGTTTTGGGTGGCCATATAGACTCTCTCAACAGCAGAAACCCAACAGG
CC_OL_004_L02	CC1G_05923															YBR286W	APE3	Vacuolar aminopeptidase Y, processed to mature form by Prb1p			0		GTGTGGCTTAACAACGCAAAGGCTGCTGCGCATTCGATTGCTACGTTTGCACGGTCGCTGGATGGGATTC
CC_OL_004_L03	CC1G_05940																				0		ATCTACGAGAACCTGAGAACGAGGGAACAGCAAATATGCCGACAAGACAAGGACGCGTACAACGCTATGG
CC_OL_004_L04	CC1G_11192																				0		TTCATCTTCGCGTACGATATATCCAAGCCATGGACCCGAGTGCAATTTCTGGACACACTCAACCTCGAGC
CC_OL_004_L05	CC1G_11206															YJL039C	NUP192	Essential structural subunit of the nuclear pore complex (NPC), localizes to the nuclear periphery of nuclear pores, homologous to human p205			4		CGAGATTATGTCTCGACGATTGAGGGATACCGCTGGCCTTTTAGATGACAATGGTGGTGGCGATCACGAA
CC_OL_004_L06																							GCGAGCGTCGAAGTTGCAATCAGGGAGACACCCAATAGACATATCGTTTTTCTTCTTGAAGAACACCGGC
CC_OL_004_L07	CC1G_10851																				0		AGAGCCGGAGAACGACGGGGTAGCAATCAAATACACAACCCTACCCGGCGGGAACCAAGTTTACTTCAAC
CC_OL_004_L08	CC1G_10848																						TGAAGACTGCATTGAGGGAGGGTGGAGCAACCGATCTGAATGTCTACAGTGTGGGATTCGAGGATCCAAT
CC_OL_004_L09	CC1G_10849																				0		ACTGCAGTTCCGCCTGGCGGAGGTGACGAGGAGTGTGAATGAATCGTGGTTTGGGAATGCTGATAAGAGG
CC_OL_004_L10	CC1G_15335															YNL041C	COG6	Component of the conserved oligomeric Golgi complex (Cog1p through Cog8p), a cytosolic tethering complex that functions in protein trafficking to mediate fusion of transport vesicles to Golgi compartments			0		CTGAGTTGTATCTCGAAGAGCGAGGAGAAGATCATGCTGAGACCCAAGTGGGATGGGAAGGTGTATACGA
CC_OL_004_L11	CC1G_02140																				0		TTATATCGAGTTTCTGAAGTCGAGCACTTCGTGGTTCCAAGGGGTATCTACTTTTGCGGGCCGGTTCCTC
CC_OL_004_L12	CC1G_02238																				7		AACCTACCGAAGTAGAAAATGTTGAGGAGCGAAACCTCAGACGCATCGTGTTGCAGCCAGTCAGGGCACA
CC_OL_004_L13	CC1G_12414																				0		AGGCCACTGGTGCAATGAGCTACGCCTTCATTTCTGCTCTGACTGCCAAACACCAACAGAGTTACCAAGA
CC_OL_004_L14	CC1G_10091																				0		TACCAGCAACGTTGGTATGAGCGTGAGCGGTGGTATGGAAGAAGAGGACGTGAATCCGTTTGAGAATGCT
CC_OL_004_L15	CC1G_09842																				5		GAAAAAGACGGTGGTAACCATACCCCCGCTTTCGCAAAATCTGCAGCAACGATTGAGGCACATTACGCGT
CC_OL_004_L16	CC1G_08293															YOR306C	MCH5	Plasma membrane riboflavin transporter; facilitates the uptake of vitamin B2; required for FAD-dependent processes; sequence similarity to mammalian monocarboxylate permeases, however mutants are not deficient in monocarboxylate transport			0		CGCTTGTTGGTCCGCCTATTTCGGGCGCTTTGTATGATAAGACTGGGGGGATGCATGCTGTTAGTTACTA
CC_OL_004_L17	CC1G_02409															YGR098C	ESP1	Separase, a caspase-like cysteine protease that promotes sister chromatid separation by mediating dissociation of the cohesin Scc1p from chromatin; inhibits protein phosphatase 2A-Cdc55p to promote mitotic exit; inhibited by Pds1p			0		AGGCGAGGTCAAATTGGTGGAGGCAGAGGAATGAGCTTGATGTTCGGCTCAAGGACCTTTTGGAGAACAT
CC_OL_004_L18	CC1G_09223																				0		TTGTTGCCCATGCCTCGTACACCGTTGTCCCCATTACGAAGGAAACTATCCTGGACGGTTTGGAGACTTT
CC_OL_004_L19	CC1G_12425																				0		TACTGGGGCACCAATGCTGCTTCCAGGGTCACCAGTGTGTTCAACGCTGTGGCCAATGAAAATTCAAGTT
CC_OL_004_L20	CC1G_06488															YHL016C	DUR3	Plasma membrane transporter for both urea and polyamines, expression is highly sensitive to nitrogen catabolite repression and induced by allophanate, the last intermediate of the allantoin degradative pathway			0		TGGGAGTCCTCCTCGGATCTGCAGTCGTTCCTATTGCCCTCGCTATCACTTGGCATAAAGCTAATAAGTG
CC_OL_004_L21	CC1G_06482															YLR126C		Putative protein of unknown function with similarity to glutamine amidotransferase proteins; has Aft1p-binding motif in the promoter; may be involved in copper and iron homeostasis; YLR126C is not an essential protein			0		GAGAACCCGTCTAATAACAATGACAACTCGGATGCACAGCCCGTCTGGCAATTCACTCTCGACTCATATG
CC_OL_004_L22	CC1G_06501																				0		AAAATCTTCGTGTACGTCCCCGCTTTTGTAACCCTCCTAGCCTGGACCATTCTAACACCGTCTGCTCACA
CC_OL_004_L23	CC1G_10935																						GCGTACAGCAACGGACTGGGATTAGGAAACAAGTGGCCCTTAACTACTCCCGGAGACAATAAATTAACCC
CC_OL_004_L24	CC1G_04021															YHR028C	DAP2	Dipeptidyl aminopeptidase, synthesized as a glycosylated precursor; localizes to the vacuolar membrane; similar to Ste13p					TTTATGAGTTCGAAGGTTGTGGAGGCGAATGAGGGGGTGCATACGTTGGCTATGGCTGTTGCTCCTGTAA
CC_OL_004_M01	CC1G_03952											+											CACCGATTTTGTACATGGAACGAGGAGTTTGAGTGTGAAGATCGAGCATCCTGGGTTGATCTGGACTGCC
CC_OL_004_M02	CC1G_07017												+								0		TTCAATTTACAGCGAATAAGCGAAAGGCGGTGGATGACGCTATAGAGTCCCGGAAAGGTGGCAAGGTCAC
CC_OL_004_M03	CC1G_03799															YOR125C	CAT5	Protein required for ubiquinone (Coenzyme Q) biosynthesis; localizes to the matrix face of the mitochondrial inner membrane in a large complex with ubiquinone biosynthetic enzymes; required for gluconeogenic gene activation					CAATGGCCTGTACCGAGGCGGTCGAGACAGTTATTGGGGAACACTATGACGACCAACTAAAAGAACTGGA
CC_OL_004_M04	CC1G_12086																				0		CTCCTTCGGCATTGTTCTCTTCCTCTTTGTCAAGTTTGCCGTCCTCCTCCGATCCAATCCAACTCGATGG
CC_OL_004_M05	CC1G_11395															YER078C		Putative mitochondrial metallopeptidase			0		CCAGCCGTTCGTCGCTTCGCATCCTCATTTGAATATCTTCTACAAGTATCGACAGGCCTCGGATTTTTGG
CC_OL_004_M06																YDR205W	MSC2	Member of the cation diffusion facilitator family, localizes to the endoplasmic reticulum and nucleus; mutations affect the cellular distribution of zinc and also confer defects in meiotic recombination between homologous chromatids			0		AGGGTAGATACGCTTTTGAGAGAGAGAATACCCGGGTTGGAGAATCTGACGATTCAGGTTGAGGGGCAAC
CC_OL_004_M07	CC1G_09019												+		+	YJL172W	CPS1	Vacuolar carboxypeptidase yscS; expression is induced under low-nitrogen conditions			7		GCGCCTAGTATGATGACCGGAAACACAGATACCCGTTTCTACTGGGACCTTTCGAGGCATATCTTCCGAT
CC_OL_004_M08	CC1G_13934														+						8		GTCTCCCCAGATACGATGAATCCTCGTTCGCTCGCCAGGTATTATGGGACAGTCAAGATAAGCAAGGACA
CC_OL_004_M09	CC1G_05155															YGL207W	SPT16	Subunit of the heterodimeric FACT complex (Spt16p-Pob3p), facilitates RNA Polymerase II transcription elongation through nucleosomes by destabilizing and then reassembling nucleosome structure					ACTCTGTAGACATCCCGATGGCTGAGGGTCCGGTCAACTTGAACTGGGGTCCCATTATGAAGCATATCAA
CC_OL_004_M10	CC1G_09360																				0		GATTGGTATGGCGATTCCTATACCAAAAACATCCCCAGTCATCTCGCTCCACTCGACGTGTCTTCTGGCT
CC_OL_004_M11	CC1G_06968															YFR044C	DUG1	Probable di- and tri-peptidase; forms a complex with Dug2p and Dug3p to degrade glutathione (GSH) and other peptides containing a gamma-glu-X bond in an alternative pathway to GSH degradation by gamma-glutamyl transpeptidase (Ecm38p)			0		ATGGGTCGAGGAGACGATGGTGCCCATTCTACGAACGAAAAGTTGGACAGGAGCAACTTCATTCAGGGAA
CC_OL_004_M12	CC1G_06945												+		+						0		TGTGTCGATGACACTCAGATTTTTGCGACTGGCTTCAGCTACGGTGGTGGCATGTCCTACTCTCTCGCTT
CC_OL_004_M13	CC1G_09863																				0		CCTCCCCACCCGATATAACAGACGCGGCGTTCGGACTGCATCTTGCTGTAAAGGAGTTGCGTGAGCTCGG
CC_OL_004_M14	CC1G_07476																				0		GGGTTGAAGGTGTACACCAAAAGTACTACGGCTGCCACAGTGAAGGCTCGATTGAACGATGACCAGTACT
CC_OL_004_M15	CC1G_07467																				0		TAATCAAGCCCTTGCCATGGGGATCTCGCTTCCTGGTGTGCGTTTCTGCCTGCAAAGATAGTCAGACAGT
CC_OL_004_M16	CC1G_07472																				0		CAATTAAAGACGACGCGGAGGAGGCAGGGCAAGAGTCTAACCCACAACTCGAGATCGAAGAATTAACACC
CC_OL_004_M17	CC1G_08415										+		+		+						9		ATTGCGATTGGATGCAGAGAACCACATGCTCGCTATGGCGCCTGCTTCTTGATGATTGCTGGAGGGGGCT
CC_OL_004_M18																					0		TGATTTTATCTGTGAGCCTGTTAAAGCGTGCCATGTGTCCTTCAACGATATCTACGGCGTTGCCGGCGAC
CC_OL_004_M19	CC1G_04168																				0		AAGACGTCGTATGGTAGCGGACAGGTTGAGGCGTTCAACGGACAGGGTGCTGGACACGGTTTGCCTGAGA
CC_OL_004_M20	CC1G_14504																				0		TTCGGATCCCCAATACCCGACTGCAGCCTATAGCGACCATTGTGCCCTTTTCTCATCATTCGACCTACTT
CC_OL_004_M21	CC1G_08693																				0		TTGAAGACTACTGGTGCCAAACCTGATCCTCTTGCGCCTCCTGACCTGCATAATTGGCGAACTGCTTACA
CC_OL_004_M22	CC1G_08667																				0		ATGTGGAGGTGAAGACTGTTCACGATACTGAGGAGGAGGAAGGGTATGTGGGGATGACGCTGTTCAATGA
CC_OL_004_M23	CC1G_04562																				0		TTTCCAGTGTCTCTGGCTTGGATTGGATTAGAACCCAAGTTGCCGCTTCTGGAAGACCCTCGGTTGTTTC
CC_OL_004_M24	CC1G_15138																				0		TAAGATTCGAGCTCAGAGCATCGCGGATAATCGGGTGACAAAGTTGAAATCCCAATTCATGCCGAAGACC
CC_OL_004_N01	CC1G_10096		+		+																	lap	TTCTCTCCGATGCCATCTACTACACCTCGACTGAGTACAAGCCTCACACTTTGATCGACGTTGCCACCTT
CC_OL_004_N02	CC1G_00916																				3		ATTCCCTTTCGGTTCCTTAGGCAGAATCGATCCCAGCCCCTTCCCCATCAACTTCATGACAGAACTTGCC
CC_OL_004_N03	CC1G_00851																				0		TTTTAGCGTACTCCAGCATATCGATGCTTAGGCAACAACTCAAGCCCGACCACCGCATCCATGGCGTAAT
CC_OL_004_N04	CC1G_00802											+											TCTTCTACATCGTCGCAGACATCCCCTCGAATCTCATTCTCAAACGTTACGGCTCCACTTGGCTCGCAAT
CC_OL_004_N05	CC1G_00861															YIL022W	TIM44	Peripheral mitochondrial membrane protein involved in mitochondrial protein import, tethers essential chaperone Ssc1p to the translocon channel at the matrix side of the inner membrane			0		CGCTTACAAGGCTCTTTCTGACACTCTTATTGATGCTCTGGACGACAGTGGTAGTGCGAAGCATGCTGGT
CC_OL_004_N06	CC1G_00888												+		+						0		ACGAAGAAAGTGATGTGCCGTGTTGGAGGAGGATGGCAAGACTTGGGTATCTACCTGTTGAACCGTCAAG
CC_OL_004_N07	CC1G_00900																				8		GCGCTCTCCCCTACATCTCAAGTCTTGACATCAAGAACAATGCAGACCGAGGTCTTCGACTTATCAGCCT
CC_OL_004_N08	CC1G_01581											+									3		GCTTTACAGGAAATATCTCGTATTCGCCATTACTCTTTTTGCATCAACAGCACCTTTGGGAGATGCACGG
CC_OL_004_N09	CC1G_01555															YPR191W	QCR2	Subunit 2 of the ubiquinol cytochrome-c reductase complex, which is a component of the mitochondrial inner membrane electron transport chain; phosphorylated; transcription is regulated by Hap1p, Hap2p/Hap3p, and heme			4		GACTTCGTACATCACCTCTGCCAAGTTCACCCGCCATGAGTTCCAGGAATACGTTGCACCATTGATTGAG
CC_OL_004_N10	CC1G_10333																				0		GCAACCCCAACCTTCCGTATTTCAGGCAAGTTGTATCCGAGCTACACGCTAGCGAACATTATTCACGCCA
CC_OL_004_N11	CC1G_01727															YLR148W	PEP3	Component of CORVET tethering complex; vacuolar peripheral membrane protein that promotes vesicular docking/fusion reactions in conjunction with SNARE proteins, required for vacuolar biogenesis			0		ACCGCAACCTGCGACTCAACGAACACTGCTATCAGCTAACTTTGGACCCATTGTGAACCCGTTGCAGAAT
CC_OL_004_N12																							TCGCAGACCTGCCCATTGTACTCGAGACCGCGACAATCCATGTAAGTTCCTCCATTGACGATCCTTGATA
CC_OL_004_N13	CC1G_02438																				0		CACCCAGTATGCCAAGGCAATCCCAACAAGGTCCTATTTTCAACCACGATCATCGACTCGGAGAAACGCA
CC_OL_004_N14	CC1G_04948																				0		CCTACCAACTTTAGTGGAAGGAGTGATTATGGGCCGTTTTTGGAGTATGGTATTCCCTGTGGTGGGCTTT
CC_OL_004_N15	CC1G_10850																				7		TTGAGCCAGGAGGGGTCATCACCTCGCCTGCGAACAAGGATGACGATAAGGGCACACCAACAGGTGCCAT
CC_OL_004_N16	CC1G_10536															YBR248C	HIS7	Imidazole glycerol phosphate synthase (glutamine amidotransferase:cyclase), catalyzes the fifth and sixth steps of histidine biosynthesis and also produces 5-aminoimidazole-4-carboxamide ribotide (AICAR), a purine precursor			4		TAACCAAAGGTGACCAATACGATGTTCGTGAAAAGGCCGTCACCGCAGACACTGCAGGTGCAGTACGAAA
CC_OL_004_N17	CC1G_02247																				0		TACTTCTACCAGTGGCTGTCCCGACACCAAGAACTCCTGTGGCGCAGGGGAGGAAGGTGACCTCCCAGAT
CC_OL_004_N18	CC1G_01187															YLR088W	GAA1	Subunit of the GPI (glycosylphosphatidylinositol):protein transamidase complex, removes the GPI-anchoring signal and attaches GPI to proteins in the ER					TACGCTTGCCATTCCTTTTCCCATTTAGGCGTTTTCCATGAGGGAGTTAACGGTCGACTACCCAACCAGG
CC_OL_004_N19	CC1G_03122																						TCTTGGGCGTCAAAGTGCTTAACGACACAGGCTCTGGCACACTCGCGGATATTGTTTCAGGACTCAACTA
CC_OL_004_N20	CC1G_09217																				0		CTTCGCCGCTTCCCTTACTCTACCAATCCATCGACCAATCCTTTGACCTACAAGGATGTTTCTGTGAGCG
CC_OL_004_N21	CC1G_14709																				0		CTTCGACTGATACGAAGGATACAGAGGGTAAAAGCGGGTCCATGAGTGGTGTGCGCAGATTCTTCTCGTT
CC_OL_004_N22	CC1G_04564																				0		TTGAACGCAGGAAAGGTTACCACCCTGCTGAAGCTGATAGAGGGGTATCGCAAGGAGGATAGGAAGATGT
CC_OL_004_N23	CC1G_00839															YBL088C	TEL1	Protein kinase primarily involved in telomere length regulation; contributes to cell cycle checkpoint control in response to DNA damage; functionally redundant with Mec1p; homolog of human ataxia telangiectasia (ATM) gene			0		TCCGTCCAAGCGGATAAGCCGCTGCTTAGGCAGAAGATTGCACAGGGAAGGACTGTGCCCGCCACTGTGA
CC_OL_004_N24	CC1G_07448															YMR190C	SGS1	Nucleolar DNA helicase of the RecQ family involved in maintenance of genome integrity, regulates chromosome synapsis and meiotic crossing over; has similarity to human BLM and WRN helicases implicated in Bloom and Werner syndromes			0		CTCGTGGAAGCTACACGAAGGCAAATAAGAGACAGGGAGAAGAATGGATATGAACGCGCTTACAGTCGCC
CC_OL_004_O01																						lim15/dmc1	CGTCGAGGTGAGTGAAAGGGCTACCTTGAGCTTTGTGATGTCTTGCACATTTATACCGTGCTGCTGGAGT
CC_OL_004_O02																						msh5	TTCGAGCACATGTATGACACCCTTGACCGGCTCATAGTACGCGACGCCCACACGGCCGCTTAAAAGGGAT
CC_OL_004_O03	CC1G_03723															YNL088W	TOP2	Essential type II topoisomerase, relieves torsional strain in DNA by cleaving and re-sealing the phosphodiester backbone of both positively and negatively supercoiled DNA; cleaves complementary strands; localizes to axial cores in meiosis				topII	GAAAGCGACGATTACAATCTCAACAACGTTTCTGGTTCAGAATCTGACGATTATGTCCCAGTGAAGAAGG
CC_OL_004_O04	CC1G_05700																					bad42	ACGTTTGAACAGGAACACGATAAGCTCTTAGGCGACATTATAGATCTAGGTTTTCCATTTGCGCCCCTTC
CC_OL_004_O05																YBL063W	KIP1	Kinesin-related motor protein required for mitotic spindle assembly and chromosome segregation; functionally redundant with Cin8p					TCATGATAAACCATTGCTTGATCTGCTTCGGGGCCAAAAACGAGGTCGAAAGGGTATGTTCTAGTTGGCG
CC_OL_004_O06	CC1G_09782										+		+		+							eln2	GACGAGCAGTAGTATCTTCGCTGGTCTAGGATGCCTTCTTGTCGCCTCCATCATTTACTTCCGGAAGCTT
CC_OL_004_O07	CC1G_10193																					eln3	CTCCGCTGCGGTCACGTTTCATAATAGTGATTATGATTTATGGGATGCTTGGCTACACAAGATTTGTGAG
CC_OL_004_O08	CC1G_12660																				0	hyt1	AGACCTGACTGTTGTTTGACAGGACTATTGTCTGAATACGATCAGGACATTCGCTTCCAATTACTCCAAG
CC_OL_004_O09	CC1G_08484																					ich1	TTACGGAGATTGCGAGTATGAGCCTATGCCTATACCTACGCCGTACCCTGCGCCAACGCGTGGCTCGTCG
CC_OL_004_O10																YMR224C	MRE11	Subunit of a complex with Rad50p and Xrs2p (MRX complex) that functions in repair of DNA double-strand breaks and in telomere stability, exhibits nuclease activity that appears to be required for MRX function; widely conserved				mre11	AAGTCGACCTTGGGCACCGTTAACCCTGACCATGCAGAGACACATTGGGAGTCAATACCTCATTCTTGAC
CC_OL_004_O11	CC1G_03702															YHR120W	MSH1	DNA-binding protein of the mitochondria involved in repair of mitochondrial DNA, has ATPase activity and binds to DNA mismatches; has homology to E. coli MutS; transcription is induced during meiosis			0		CCAAACACCATCGAAATGACCCCATCGTCCAATGTGCATGTCATTACAGGACCCAACATGGCAGGCAAAT
CC_OL_004_O12	CC1G_07392																					pcc1	AATTATCGGCCAGATGTGGAGGACTGAATCCGATGCAACGCGAATGGAGTACGAACGACGCGCAGACGAA
CC_OL_004_O13																							TCAGTTATCTGGACGTTGTTATTACCAGAGGCACCACGCACCAACTGACTGCTCAATGTCAGTCTGCAGC
CC_OL_004_O14	CC1G_03652	+																				rad21.2	GCGCAAGCTTTCCAAATCACAGACTCTCCAAACCGATATTGAACAGTCCGTCGGTGCGTACATATTCAAC
CC_OL_004_O15	CC1G_03010	+														YNL250W	RAD50	Subunit of MRX complex, with Mre11p and Xrs2p, involved in processing double-strand DNA breaks in vegetative cells, initiation of meiotic DSBs, telomere maintenance, and nonhomologous end joining				rad50	ACGAGAAGGAGGTCAAGGCGCAAGTAAAGCTGAGGTTCCATTCGGCTAATGGCACGCGCATGTTGGCAGT
CC_OL_004_O16	CC1G_03010															YNL250W	RAD50	Subunit of MRX complex, with Mre11p and Xrs2p, involved in processing double-strand DNA breaks in vegetative cells, initiation of meiotic DSBs, telomere maintenance, and nonhomologous end joining				rad50	CAGAAAGACCGAGCTGACAAGCTCCGTTTACGAATGAAAGACCTTAATGCCACTATTGTAGCAAAAGAAG
CC_OL_004_O17	CC1G_03010															YNL250W	RAD50	Subunit of MRX complex, with Mre11p and Xrs2p, involved in processing double-strand DNA breaks in vegetative cells, initiation of meiotic DSBs, telomere maintenance, and nonhomologous end joining				rad50	AGGAGGCAAGACATCGAGGATGAGCTAACTGACCTTCGCAACCGAGAGGTACAGCTGTCGGAAATGAAA
CC_OL_004_O18	CC1G_04178															YGL163C	RAD54	DNA-dependent ATPase, stimulates strand exchange by modifying the topology of double-stranded DNA; involved in the recombinational repair of double-strand breaks in DNA during vegetative growth and meiosis; member of the SWI/SNF family			0		GACAAGGATGGGATTTACCACAATGAGGACGAGCTGTGGGCTATGCACAAGAAATACCCGGTGTACAAGC
CC_OL_004_O19																						rad9	ACGAATAATAGTTTGGCTGCACAAAGCTTGGGGGCGCTGCCGTCATGGTCATGTTCGCTATGTGTCTCAC
CC_OL_004_O20																YER095W	RAD51	Strand exchange protein, forms a helical filament with DNA that searches for homology; involved in the recombinational repair of double-strand breaks in DNA during vegetative growth and meiosis; homolog of Dmc1p and bacterial RecA protein				rad51	GCTGGAAGGCGGTCAAGGGTTTTCCATACAACCTGTAATTTGGAGCTCACCCTCTGCTAAAATCTTGTCG
CC_OL_004_O21																							GCATAATTCAGATATGTCCGCTGTTATGACGGATCGCCTGGGAAGCCTTTTGAAGGCGGATTTTGAGCCG
CC_OL_004_O22																							TGCCCAACCAAAAGCATCCACGACTATTGAAAACCCTGCCGCGAATTTCGGTACAGCCCAAGGCGCCGCT
CC_OL_004_O23	CC1G_15063															YJL074C	SMC3	Subunit of the multiprotein cohesin complex required for sister chromatid cohesion in mitotic cells; also required, with Rec8p, for cohesion and recombination during meiosis; phylogenetically conserved SMC chromosomal ATPase family member			0		GGGAGAAGGAGGTTCGGGATTTGGGGAGGGGGATTACGGAGGCTGAGCATCAACTTGAGACGCTTGCGCA
CC_OL_004_O24	CC1G_03320															YHL022C	SPO11	Meiosis-specific protein that initiates meiotic recombination by catalyzing the formation of double-strand breaks in DNA via a transesterification reaction; required for homologous chromosome pairing and synaptonemal complex formation				spo11	TGACCTCTGTATTTGTCCAGCGAGCCCGCAAAACGGAGTCTCAAGTTCCCTAAGAGATTTGCTACGGGAA
CC_OL_004_P01			+										+										TGAGGAAATTATAAGCTCGTCCCTCAAGTATTTCAACTTCATCATGGACACTTACCGACTTGCACCGAGG
CC_OL_004_P02																YCR077C	PAT1	Topoisomerase II-associated deadenylation-dependent mRNA-decapping factor; also required for faithful chromosome transmission, maintenance of rDNA locus stability, and protection of mRNA 3'-UTRs from trimming; functionally linked to Pab1p			0		TTTCAAGCATCAGATTGTGAGCCAGCCGTTTCTCGAGCTCCTCCATCCTGCGCTGCTCTTCAAGCAACAT
CC_OL_004_P03																							ACGAAGCGTGAGTTTGGAGAGTTTGCTGGTAGCGGTTGTGTTCGAAGTAGTGGACCCTGCAGTCAACGTG
CC_OL_004_P04																YPR141C	KAR3	Minus-end-directed microtubule motor that functions in mitosis and meiosis, localizes to the spindle pole body and localization is dependent on functional Cik1p, required for nuclear fusion during mating; potential Cdc28p substrate			0		GCAGCTCATCGCCAGAACGAAGTTTGGAAAATGTACCGGCATTGACGACGACATACGTGAATACCCGGAA
CC_OL_004_P05	CC1G_00579																				3		TGTAGCAAACAAGGTAGAAACGATACATCGCCTAATCGGTAACGCAGTTCCAATACCCCTGGGCAAGGCG
CC_OL_004_P06	CC1G_10275															YER146W	LSM5	Lsm (Like Sm) protein; part of heteroheptameric complexes (Lsm2p-7p and either Lsm1p or 8p): cytoplasmic Lsm1p complex involved in mRNA decay; nuclear Lsm8p complex part of U6 snRNP and possibly involved in processing tRNA, snoRNA, and rRNA			0		CTGACCTTTTATCTTCATCTTCGCACTTTCTAAACCACATCTTCGTGTTGCAGTTGATCCCAGGAAGCGA
CC_OL_004_P07	CC1G_12048															YCR077C	PAT1	Topoisomerase II-associated deadenylation-dependent mRNA-decapping factor; also required for faithful chromosome transmission, maintenance of rDNA locus stability, and protection of mRNA 3'-UTRs from trimming; functionally linked to Pab1p					ATCCTGAGGATCCCCCAGAGGCCATGGAACAATGGAAAAAAGAGTACGACGAGAACGTCGAGTTGATCTG
CC_OL_004_P08	CC1G_04178															YGL163C	RAD54	DNA-dependent ATPase, stimulates strand exchange by modifying the topology of double-stranded DNA; involved in the recombinational repair of double-strand breaks in DNA during vegetative growth and meiosis; member of the SWI/SNF family					TGGTGATGCTAGCACTTGGAACCACTTTACGAATCCCGAGCTCAAGAACAACCACGATGATCTTCTGCGG
CC_OL_004_P09	CC1G_03702		+		+		+		+							YHR120W	MSH1	DNA-binding protein of the mitochondria involved in repair of mitochondrial DNA, has ATPase activity and binds to DNA mismatches; has homology to E. coli MutS; transcription is induced during meiosis					CGAAGTACTTTCATGGTCGAAATGATGGAGACTGCAGAAATTCTCCGGCGGGCAACTCCAAATAGCCTGG
CC_OL_004_P10																YPR141C	KAR3	Minus-end-directed microtubule motor that functions in mitosis and meiosis, localizes to the spindle pole body and localization is dependent on functional Cik1p, required for nuclear fusion during mating; potential Cdc28p substrate					ACGCAGAGTATTAATAAGAGTTTGAGTGCGCTTGGGGATGTTATTGCTGCGCTTGGTGAAAGGGGTGGGG
CC_OL_004_P11	CC1G_15653		+																		0		GTAGGATATGCTCAGTCTCTATGGAAGGTAGCTGAGGAGCCCTTGATTGCAGATGCAGACCTCAAGACCT
CC_OL_004_P12	CC1G_07448															YMR190C	SGS1	Nucleolar DNA helicase of the RecQ family involved in maintenance of genome integrity, regulates chromosome synapsis and meiotic crossing over; has similarity to human BLM and WRN helicases implicated in Bloom and Werner syndromes					TTGTGGTCGCCACGATTGCTTTTGGCATGGGGATTGACAAGCCTGACGTTCGCTTTGTCATTCACTACGA
CC_OL_004_P13	CC1G_15063															YJL074C	SMC3	Subunit of the multiprotein cohesin complex required for sister chromatid cohesion in mitotic cells; also required, with Rec8p, for cohesion and recombination during meiosis; phylogenetically conserved SMC chromosomal ATPase family member					TTGATCAGCGCAAAGACGAGGCTATTGAGAGGACGTTCAAGCAGGTTGCGAAGAATTTCGAGGAGGTGTT
CC_OL_004_P14	CC1G_00839															YBL088C	TEL1	Protein kinase primarily involved in telomere length regulation; contributes to cell cycle checkpoint control in response to DNA damage; functionally redundant with Mec1p; homolog of human ataxia telangiectasia (ATM) gene					ACGAACTGATCGCCATTGCGACGGACCCTACCAACTTGGGAAAGATCTTCTATGGATGGGCTCCTCATAT
CC_OL_004_P15	CC1G_04229															YKL160W	ELF1	Transcription elongation factor that contains a conserved zinc finger domain; implicated in the maintenance of proper chromatin structure in actively transcribed regions; deletion inhibits Brome mosaic virus (BMV) gene expression					GAAGGCGTCGCCCAGCTAGTCTGCAAAGTCTGTGATCAACGATACCAAAGCAAAGTAAACCATCTCACAG
CC_OL_004_P16	CC1G_04230																				0		GAATGAGATCTTCGAGTACGGTGTAAAGGACATCGTGAAAGACGTTCTGGATGGATACAACGGCACGGTC
CC_OL_004_P17	CC1G_03522										+		+		+						0		GCAAAGGAAAGGCTGGAAAGTCCGGAGGAAAGGCTGGCGGCTCTGACAAGGCCCAATCCCGCTCTTCCAA
CC_OL_004_P18	CC1G_08102															YMR284W	YKU70	Subunit of the telomeric Ku complex (Yku70p-Yku80p), involved in telomere length maintenance, structure and telomere position effect; relocates to sites of double-strand cleavage to promote nonhomologous end joining during DSB repair			0		GGACCTTCAAGGCCCTGCTAAACTCCATGATTGAAAAGGACAAGATTGGTTTGGCGCTCGTTCTCATGCG
CC_OL_004_P19	CC1G_15287																						AAGCCTTTCACCAACTTCAGTGTCTTCCACGACAACCTCATCACTCGCCTGAAGCAAGTCAGCCAAATCC
CC_OL_004_P20	CC1G_06567																				2		CTTGTACCCTGCACAACCGAGTGCTTGGATGAAGAACGAGCCTGGTGCAGAGATTTACATGACTGCTAGA
CC_OL_004_P21	CC1G_11294																				0		CACTGCCCATTCGGCTGGGGCAATCACAGAGGAGGAGGTCAAATTTTCTTACGTTGCAAACAGGGATGAT
CC_OL_004_P22																						ribosomal DNA	AAGTTTGAGGCAATAACAGGTCTGTGATGCCCTTAGATGTTCTGGGCCGCACGCGCGCTACACTGACAGA
CC_OL_004_P23							+		+														ATCCTTTGCAGACGACTTGAATGGGAACGGGGTACTGTAAGCGGTAGAGTAGCCTTGTTGCTACGATCC
CC_OL_004_P24	CC1G_11293																					rec8	TATCGGGCTTGAGATTGGACCACTAAACGGGTCGAACGGTTCCCAAAGGAGCTCTTTATTTCCTTGGGAC
CC_OL_005_A01	CC1G_04641																						TATTGAACCGCTAAAAGACGCGATTGCGAAGGGCAAGAATTTGCGGGCGTTGAAGTTTGGTCGACCACCA
CC_OL_005_A02	CC1G_07355																				0		TCGGATGGAGGGCCAGGAAACGCATCTTTGATATTGAGCGGTACGGTGAGCTTACGCGTGGAATGCTGGT
CC_OL_005_A03	CC1G_05690		+										+			YFL045C	SEC53	Phosphomannomutase, involved in synthesis of GDP-mannose and dolichol-phosphate-mannose; required for folding and glycosylation of secretory proteins in the ER lumen			5	alg4	CAATTTGACTATGCATTTGCAGAGAATGGCCTGACTGCCTACAAGCTCGGGAAAGAGCTACCATCGCAAT
CC_OL_005_A04	CC1G_11759															YNL329C	PEX6	AAA-peroxin that heterodimerizes with AAA-peroxin Pex1p and participates in the recycling of peroxisomal signal receptor Pex5p from the peroxisomal membrane to the cystosol					TCGATAAACGGATTTCCGAAATAACAGAATCTGACCTCGCCGCTCTCTCCTCCACATCCGGAGTCAAGCA
CC_OL_005_A05	blank																						0
CC_OL_005_A06	CC1G_15774																				0		ATGTCCGCCAACAACACTGCTGCTAACACCCGCCAACAAGTCTTTGGATCGCTTCAAGTTGCTTACAACG
CC_OL_005_A07													+										TACCATCAAACCCGGTTCAACCACGCCCCAGGACCCTCGTCGCCATTTTCCGGACCTCTTCCGGTGTTAT
CC_OL_005_A08	CC1G_05342																				0		GACGAGGGTACACCACACTGGAACGAGATTGAGGGTGGATTCCATTGTGTTCAGGCTATCACGGATGATG
CC_OL_005_A09	CC1G_05922															YFL024C	EPL1	Component of NuA4, which is an essential histone H4/H2A acetyltransferase complex; homologous to Drosophila Enhancer of Polycomb					GTCCAGATGGTCCTGACGAACAAGATCGTCTGCTGTTGGATGACTATGATCCCAAGTACCTACGATACGC
CC_OL_005_A10	CC1G_08969																				0		GCGCTCTCGGGGGCGTCTGTCGGGATGGACCTATCGCTGGTGTTTTGGGATTTATATTATTCAGGCCCGG
CC_OL_005_A11	CC1G_10435																						TAACAACTCTGTCAATTGTGGTATCCGCAGTGTTCAGCATGTACAAGGAGGGCATGTACTCCCTCGCCGT
CC_OL_005_A12	CC1G_14875																						CAATGCTCTATTTGCGCGAGGTAACCGGACTGCCAGAGAATTCATTTTGTGTCCAGAATTCAACTGCGCG
CC_OL_005_A13	CC1G_12611																				0		TCTCAATCAGTACTACGAAATCCCGCACTACAAATTCGACCGACTCGGATTACAGCGCCCGCTCATTCTC
CC_OL_005_A14	CC1G_04144								+		+										3		GCCAGGGAGGAAGTTCCATCACTAAATACGTGAAACACGTGCGCGACAACGGAGACAAGAAACTGCCATT
CC_OL_005_A15	CC1G_08942																				0		TACGACTCGTGTTTCAATTCGTGGTTTGAAGGCTATCTCGAGCCTGCGGTGTCTGCGGCATCCAACGATC
CC_OL_005_A16	CC1G_03566												+								0		TTTTCGTATTTCCGTTCGCCACACTGGATGCAACATCTCCTTCCCTCCCCGTTCCTAGCCATGTTAGACT
CC_OL_005_A17	CC1G_07317															YBR296C	PHO89	Na+/Pi cotransporter, active in early growth phase; similar to phosphate transporters of Neurospora crassa; transcription regulated by inorganic phosphate concentrations and Pho4p			0		TCGACATCCACGAAATGCAAAAAGACAAGCACACCCTCGAGGCCCACTCCCGCGCGAAGCAGTACCCCAA
CC_OL_005_A18																						coH28/29/30/31/32	ACGGGATGCACCAGCCTTAACGTCCTCGGCGTCGGAGGCGGCTCGTCGTGCACTCAGCAAAAGGTTTGCT
CC_OL_005_A19	CC1G_05249																				0		CGACAAGGATAGCATCTGCGGTGTAGGCCCGCTTCAAGAGTCATCCAACAATAATACCACACACTCGGAT
CC_OL_005_A20	CC1G_03573																						AGAGTTCTTGCCGAAGCAATATGCTGGGCAGTGGATGCCTTTGTCGAATGATATGAGAAGGCGTTCATAG
CC_OL_005_A21	CC1G_06749															YLL018C	DPS1	Cytoplasmic aspartyl-tRNA synthetase, homodimeric enzyme that catalyzes the specific aspartylation of tRNA(Asp); class II aminoacyl tRNA synthetase; binding to its own mRNA may confer autoregulation			5		TGCGAGAAAATGAGAAGCAAGGGTGTTGAGCCTGATTCTATGAAGCCCTATGTGGACGCCTTTAGGCTGG
CC_OL_005_A22	CC1G_06355																				0		TTTCAGAAAATCGAACCAAACTGAACAGTCGGCATCGAAAAAGAAGGGAAAGGAGAAGAAGGCACCTCTG
CC_OL_005_A23	CC1G_09253	+																			0		GTGAGGAATTTGCAAACGTCAATGTATGTGTTGGTTCCCCGAGTAGTAATACTAACTGCGGTCACCTCGT
CC_OL_005_A24	CC1G_02002															YNR008W	LRO1	Acyltransferase that catalyzes diacylglycerol esterification; one of several acyltransferases that contribute to triglyceride synthesis; putative homolog of human lecithin cholesterol acyltransferase					TATGTGTGTCGAGGGGTGGAAGCGACCTCGATGGAATCCCGCTGGAATCAAAATCAAGACAGTGGAGTTT
CC_OL_005_B01	CC1G_14874		+								+										7		ATATGAGCGTCAAGTATAAGGAGACGAGTCTTTCGGGTCTGGCTACGACTGTGAAGATCCCCCTCTCAGT
CC_OL_005_B02	CC1G_00937															YJL056C	ZAP1	Zinc-regulated transcription factor, binds to zinc-responsive promoter elements to induce transcription of certain genes in the presence of zinc; regulates its own transcription; contains seven zinc-finger domains			4		CTTTCCAGTGTCAGATATGTCATCAAAACTTTTCAGAAGCGGCGACCTTGCAGCAGCATATGCGGCGCCA
CC_OL_005_B03	CC1G_00359															YFR041C	ERJ5	Type I membrane protein with a J domain is required to preserve the folding capacity of the endoplasmic reticulum; loss of the non-essential ERJ5 gene leads to a constitutively induced unfolded protein response					CCGACACAGCGACTGCACCTGGGATTACGCGCACCTGGTTCATTTCTTTGGTCAAAGCTCTCATTTTCAA
CC_OL_005_B04	CC1G_10695																				0		GAAGAGGCAGTCTACACCTACACCAAATGCATAAACGAACTCGAAGCCGGCCTCATACCCGAATGGACCT
CC_OL_005_B05	CC1G_11720																				0		TGCTGCGGGAGCTTCGCAATGTTCTTCCCAGGACACCTTCAGTTGACATCGGGCATGTATGCCAGTCAAT
CC_OL_005_B06	CC1G_06756															YOL139C	CDC33	Cytoplasmic mRNA cap binding protein and translation initiation factor eIF4E; the eIF4E-cap complex is responsible for mediating cap-dependent mRNA translation via interactions with translation initiation factor eIF4G (Tif4631p or Tif4632p)			3		CTGGGAAGATGAGGCCAACAAGTATGGCGGGAAATGGAGCATTCAATTGCCCAAGGACAAGAACCGAAAC
CC_OL_005_B07	CC1G_09693																				0		GAGGAGTATGGTTAAGGAGAGACTGCATTTGGTCCAGGAGGAGTATTACTCGGATATGCACAGGGGCAAG
CC_OL_005_B08	CC1G_06981															YOR304W	ISW2	Member of the imitation-switch (ISWI) class of ATP-dependent chromatin remodeling complexes; ATPase component that, with Itc1p, forms a complex required for repression of a-specific genes, INO1, and early meiotic genes during mitotic growth					GTTCGTGGCCCTTTCGATCTATTCGTGTTTAGGCTCGTCGAGTTCACGCCCTTGCGTTGTCGAGTTTTAT
CC_OL_005_B09	CC1G_01943																				0		GTGGAAAGGCATGATAATATGGGCCTGAATGGTTCTCATGTCATCAGCTTAGAGGAGTCGGACGCGGTCA
CC_OL_005_B10																							GGTGCGACATGAAACATGTCAAGACCCTACTAGCCAACTCATCCATACGTCTACAGCTCGTATGGCAGCT
CC_OL_005_B11	CC1G_04356				+						+		+		+	YCR008W	SAT4	Ser/Thr protein kinase involved in salt tolerance; funtions in regulation of Trk1p-Trk2p potassium transporter; partially redundant with Hal5p; has similarity to Npr1p			0		AAGTTTCAGAACCAAAGCATGTCCACGTGAGTGCTCGAGAAATGGGGTCGGTGTATGCGGACAAGACCTA
CC_OL_005_B12	CC1G_09909															YNL262W	POL2	Catalytic subunit of DNA polymerase (II) epsilon, one of the major chromosomal DNA replication polymerases characterized by processivity and proofreading exonuclease activity; also involved in DNA synthesis during DNA repair			0		ACACATCTACCTTCACACCGAGAAGTTCTATGACTTCCTCATCTGCATGGATCGAGCCAACATGGGCGGT
CC_OL_005_B13	CC1G_08126															YBR136W	MEC1	Genome integrity checkpoint protein and PI kinase superfamily member; signal transducer required for cell cycle arrest and transcriptional responses prompted by damaged or unreplicated DNA; monitors and participates in meiotic recombination			4		CCGTATACGGATTCGCAGTTTGAGCAGCCTGAGAAGTTGCTCTCGACGAAGAATTTGGTGGAAGCGTTGA
CC_OL_005_B14	CC1G_10497																				0		ACAGTCTGCGGGATCATCTCCTGCATTGTCAACTCTATCAATGGCTTAGGGAACGCTGCGGATCCATCAT
CC_OL_005_B15																							GAAATCATCCCGAGCTCCGTCCTGCCAGGAACTCAGTCCGCCCCATCGGCGTTGCCGCCCAACAGCAACG
CC_OL_005_B16	CC1G_01618																				0		AGATTGCGAAGAAGCTCGGCGCTCACCATGTTATCAACTACAACAAGACGCCTAACTGGGATGAGGAAGT
CC_OL_005_B17	CC1G_05892											+									0		GTCGCCTGATACCTACTCTCTGCGCATGAAGCGCATCCTTGCATGGCGCGAGGACTTTTACGCCCAGATT
CC_OL_005_B18	CC1G_10778																				0		AAAAAATTGAGCGTTGGGCAAATGAAGAGCTACCCTTGGCGCTGTTCACTCGTCGCGCATCTGAGGAGTA
CC_OL_005_B19	CC1G_10232																				0		ACAAGGACGCCGTGAAGTGCGCCATATCGATGCACGAGAAATACCCAATACCCTTTGAGATCTCTTCCTC
CC_OL_005_B20	CC1G_02163																				0		TTTCGTCCTCGGTTTACTGTGGATTTCGATTGGGGTTATGGCCGTTAAGGGTAGGAAGGAGACGCTTCAG
CC_OL_005_B21	CC1G_06404																				0		AGGCAATCATGGAAAGCATCTCCCGACTCATCGAGTTCCGACAAATAAACGCCGAGGCCGAACACAATGC
CC_OL_005_B22	CC1G_00775															YDR069C	DOA4	Ubiquitin isopeptidase, required for recycling ubiquitin from proteasome-bound ubiquitinated intermediates, acts at the late endosome/prevacuolar compartment to recover ubiquitin from ubiquitinated membrane proteins en route to the vacuole			0		AAGTCGCTCGATCTTACGAATTACATGCCTCCGCCACTCCCTCCTGGTGCTGATAAATCCGAGATTAACG
CC_OL_005_B23	CC1G_13960																				3		TTCGGAAAGATCTCAGAGGGCAGTGCGTCAAGTGAACAAGAAGCTGTTTCACAGCAGTCGAGCGTAACTG
CC_OL_005_B24	CC1G_09160																				0		AAGGATCTACTAACATTGCTTCTGCGAGCGAACATGGCCACTGACCTACCTGAGCATCAAAGGATGAGCG
CC_OL_005_C01	CC1G_13548																				0		GTGATGGAGGTTGAACGGAACGAAATTTTAGTGGGGACGCTAGAGCCCCGTGTAATTCTCTGCGACAATC
CC_OL_005_C02	CC1G_03527																				4		TGGGCGTTCCACCCCGAAAATAACCTGTTGTTCTCGTCTTCCCTTCATGATCGTATTCCTCCGGAGGATT
CC_OL_005_C03	CC1G_13274																				0		TCACCACACCACGTCCCCAAGAAACGCCTCTCATTCATGTCCTACTCCGACTTGCTCTCCAGCACACCAG
CC_OL_005_C04																					0		CCTTGGTAGAGGGTCGGAAGAACACGGCCCCGCCGACCGCCCCATTGACGCTTGGGTTAGGAAGGGAGAA
CC_OL_005_C05	CC1G_06491																				0		TTTTTGACACCGGTACCCGGTCAGGATAAGGAAGCTGCAGGCAGCTCCAGCGCAATCAAGACTCCAATAT
CC_OL_005_C06	CC1G_11540															YOR335C	ALA1	Cytoplasmic alanyl-tRNA synthetase, required for protein synthesis; point mutation (cdc64-1 allele) causes cell cycle arrest at G1; lethality of null mutation is functionally complemented by human homolog					AGAACCCCAACGCCCAAGTGTATATTGCTTTGGTCGAGGCTGGGGGAAATGCCAAGCTCTTGCAAAGTAT
CC_OL_005_C07	CC1G_13410																				0		CCTCGAGTCCTGGGAGCAGCGCAAGTCAACCAAAATCGATACCGTCGTCAAAATTGTTCAGCACCTTATC
CC_OL_005_C08	CC1G_01313																				0		ACAGAGAAACGACCGCCACCGATAATGGCCGCCCAGTAGGGTACAAGTTGGACAGTGGAGGTGATTGGAA
CC_OL_005_C09																							GACTTGTGCAGTAAATGGATAGAAATTTGAAAATCAGTGGAGGTGCTCGTTATCGGCCCCATACCTAGCC
CC_OL_005_C10	CC1G_04437																				0		CAAGTCGGGGCAGACTATCACGAATTTGACGGCAGATCTTTTACAAGCTGATGAACTGAGGATCACCTCC
CC_OL_005_C11	CC1G_00130																				0		CGTGCTGTACAAATCGTCCAGAGTTTACCCAAGACTGGTCCTATACAGACCGACTATGAGGAGAAACTTC
CC_OL_005_C12	CC1G_05126																				2		TCTTTGTTCAGTACCTGGCCTACATCTGGTACACTCTCTCATACATCCCATACGCGCGCGCCGCAGTATC
CC_OL_005_C13	CC1G_06782															YML118W	NGL3	Putative endonuclease, has a domain similar to a magnesium-dependent endonuclease motif in mRNA deadenylase Ccr4p; similar to Ngl1p and Ngl2p			0		ATGTACTCTGTCTTCAGGTGCAAGCAGTTCCTCTCCCTACCTCAGCCGCGAAACTCACCCCCGCACAAGT
CC_OL_005_C14	CC1G_15350																						TGTAGTCCTTCTGTTCTCTACGCTTCCAGGAGGAAGTACACCGGATTTCAACCTTGGCCAGACGCTCACT
CC_OL_005_C15	CC1G_03371																				0		GGGAGGTTTCCCCTGTTGGGTTATGAAATTCACCTCTCAGTGCAACGTTGAGTTCTGTAGCGACTTCTGC
CC_OL_005_C16																YLR240W	VPS34	Phosphatidylinositol 3-kinase responsible for the synthesis of phosphatidylinositol 3-phosphate; forms membrane-associated signal transduction complex with Vps15p to regulate protein sorting; activated by the GTP-bound form of Gpa1p			0		TCCAGCCTAAACTTCTCCTGGATCTGTTCATGTACGTCTCGGTGCTTGATGTCTGGGATATTGGCGTCGA
CC_OL_005_C17	CC1G_09800															YOR058C	ASE1	Mitotic spindle midzone localized microtubule-associated protein (MAP) family member; required for spindle elongation and stabilization; undergoes cell cycle-regulated degradation by anaphase promoting complex; potential Cdc28p substrate			0		GGGAGAGGATGGGTCAGTTCGTGGAGAGCGCAAGAGAGGAGATTGTTCAGCTTTGGAACGATTTGATGGT
CC_OL_005_C18	CC1G_00279	+														YDR172W	SUP35	Translation termination factor eRF3; altered protein conformation creates the [PSI(+)] prion, a dominant cytoplasmically inherited protein aggregate that alters translational fidelity and creates a nonsense suppressor phenotype			3		CATTGATTGAGACCAGCGCGCCTGTTTGCGTGGAGAGATTCGTTGATTATCCTCAACTGGGACGATTCAC
CC_OL_005_C19	CC1G_03722															YFR009W	GCN20	Positive regulator of the Gcn2p kinase activity, forms a complex with Gcn1p; proposed to stimulate Gcn2p activation by an uncharged tRNA					AAGAGCTGTGGGTCTGCGGAGACGGAACTGTGACCAAATTTAAGGGAGACGTGCAGGCATACAAGAAACT
CC_OL_005_C20	CC1G_03895																				0		GGAGCTTCCTCATGCACTCTCGAAGCCACACCCACAAATTAACGTTGTTCCCGCCACGCCTTCTCTCCAT
CC_OL_005_C21																					0		CATCAAGTACTCGATTTACCACGGCGGATGCATTCTTGACTTTAGTGTTGGGATGCAAAGGGAACAGGAG
CC_OL_005_C22	CC1G_02328															YML049C	RSE1	Protein involved in pre-mRNA splicing; component of the pre-spliceosome; associates with U2 snRNA; involved in ER to Golgi transport			3		GATGGGGATTTGTGCGAGACTTATGCACATCTTCCTGCTTCCAAGCAGAGCTCTATTGCGAACGAGTTGG
CC_OL_005_C23	CC1G_09070																				0		TGTGGACAAGACAGACGCGCGTGTGGAGGAAGACACGGAAACAGTGACACCTGAAAAATCGACCCTCGCT
CC_OL_005_C24	CC1G_08221																				0		CTCGCGAACTCCAGAGATTTCTTACGTCTACATCGTCGCTCCTATCACAGATCTCCATCATGCCCCCAAA
CC_OL_005_D01	CC1G_06928																				8		CCTCCATATCTTATCACCCCCGGAAAGGATAAGCGTGACCTAGATTGGTCGACGGTCTTGAAACGGACTT
CC_OL_005_D02	CC1G_11776																						ACGCTAACGCTGTGTGGGCCAAAGAGGAATCGGGCAGAAGCGTCATTGGGTGGTTTACCAGATTCATGGC
CC_OL_005_D03	CC1G_07260																				0		GCATTCATTCGAGGGAACGTCAAGTGGCAAAGATTCACACATGAAGATCGGGAGCTTCCGCCTGATGTGA
CC_OL_005_D04	CC1G_02628															YPR015C		Putative protein of unknown function; overexpression causes a cell cycle delay or arrest			0		GATCAACCACCTTCACCAAAGGTTGCGTACCGGAGGATCAACGAGGTCTTTTCCTCACCGACTCCTGAAA
CC_OL_005_D05	CC1G_02381						+														0		GAGTGAGGCAACATGGTCAGGAGGACGATCTTAGAATGGCGTTGGATATGGTTATCAGCAGAGTCTGCGA
CC_OL_005_D06																							CACATGGCTCACAGCTGCCCATCTTTTCGAAAAGAGTACACAAATCGTGAAGAAGAAGCCCATCTGTTAG
CC_OL_005_D07	CC1G_14098																				0		AATTCCCCCTCTTGCGCTCCTATACCAGGGCTTCGGAATGTTCATGGATGACTTCCTCAAACGCATTCAC
CC_OL_005_D08	CC1G_00470																				0		CTAACGCAACTTCGAATCCAGTACATCGTATCGCCCCCCATATCCGACATTCCTCTTCATTGAGCAGTCC
CC_OL_005_D09	CC1G_01501																				0		CCTATCAGAAGGATGCGTGGTTTGAGGTTGTGTGGAATGGGGAGGTTGTGTATAGTGAGAAACCGGGCTT
CC_OL_005_D10																					0		AGCGTCAACCAATTCGCATTGCCATACTGCGCCCAGAGACCCTCGTTTCTGTATCGCTGTCGTGCGATAC
CC_OL_005_D11	CC1G_06593															YER019W	ISC1	Mitochondrial membrane localized inositol phosphosphingolipid phospholipase C, hydrolyzes complex sphingolipids to produce ceramide; activated by phosphatidylserine, cardiolipin, and phosphatidylglycerol; mediates Na+ and Li+ halotolerance			0		TCGCCAAAAACCGAGAGGAACGCATTGAGGCCATTGCCCACGAGCTATCGACCTTAAACCACGACATCAT
CC_OL_005_D12	CC1G_00221															YKR088C	TVP38	Integral membrane protein localized to late Golgi vesicles along with the v-SNARE Tlg2p; green fluorescent protein (GFP)-fusion protein localizes to the cytoplasm in a punctate pattern					TATCAACGGACTTTTCCTGGCAGGGAGTCTGGTCATCGCCGTATTCACTAGCTGGCTAGTCTACAATCTG
CC_OL_005_D13	CC1G_05774																				0		CGGTATCTTATGCGCCCTGAGACGGTTGAGAGTATCTATTTGATGTGGAAGACGACTGGAGACGAGGTGT
CC_OL_005_D14	CC1G_13019	+													+								TCAGGTCTGGGTCACCTTCGAAACGCGAAACGCTATACTGGACACGGGGTCCAAGAAATTCCAGGACGTC
CC_OL_005_D15														+									CTGTCCCACAAGTTCCCTCCCTCTCCCTTCTAGACTTCCCTCGCGATGTCAATGCACCGTCCCCATAGAA
CC_OL_005_D16	CC1G_09446																				0		TTCAAGAAAAGGAGCAGATCCTTCGACTCAAGGTTGGCACGCTTTCGCAAACCCCGCACCATCCGAAAGT
CC_OL_005_D17	CC1G_09266															YPL106C	SSE1	ATPase that is a component of the heat shock protein Hsp90 chaperone complex; binds unfolded proteins; member of the heat shock protein 70 (HSP70) family; localized to the cytoplasm			0		AGGAGGGCCAGATGTATGAGAGTGATAAGCTTGTGCGGGATACTGAGGAACGCAAAAACGCGTTGGAAGA
CC_OL_005_D18																YIR009W	MSL1	U2B component of U2 snRNP, involved in splicing, binds the U2 snRNA stem-loop IV in vitro; does not contain the conserved C-terminal RNA binding domain found in other family members			0		CGCTGTGACAGCAAAAGAAGCATTGGACGGGTTCACTCTGAAGAAGGGTTGGGTTATGAGCGTATCATAC
CC_OL_005_D19																							CCGACTTTGTGCCCTTTTTGCATGCCAGCGCGCTAGCCGAGTCCGCTCGCTCTACGGCACCAGCTTCTTG
CC_OL_005_D20	CC1G_03489																				0		ACAACGAACGGCGCGTCGACGATCCATAGATGTTTACGGAACTCACAACATCTTCACGACCATCATCCCG
CC_OL_005_D21																					0		ACCCCTGCTGTGATAAAGAGGCTTGATTCTCAGCCAAACCGAACGACCTTTACCAAACCGTCTGAGCGAT
CC_OL_005_D22	CC1G_05795	+													+						0		ACTACCCAACCAAACAAGACTGGGATCGGTTTCCTTGCCCTAGCATTCCTGCTTATGTTCATCTCCTGGG
CC_OL_005_D23	CC1G_03921															YMR152W	YIM1	Protein of unknown function; null mutant displays sensitivity to DNA damaging agents; the authentic, non-tagged protein is detected in highly purified mitochondria in high-throughput studies			0		ACCCAGGCAGGGGCTTTGAATCCTGTAGGATGGAAGAAGATGAAGTATCTCCCAAACTTCATCGCCAAAC
CC_OL_005_D24																							CGTAGGACCCGACGGCCGCGAATGGAGCAACGGCCTCTTCTCCTGCTGTAACAAACCTGGAACTTGCTTC
CC_OL_005_E01	blank																						0
CC_OL_005_E02	CC1G_00856																						TACTATCACATCAGAAACGGAATGATGTTAGCCCTGCTCGGACTAGATGAAACAGGGCAGGACGGTTCGG
CC_OL_005_E03	CC1G_00197															YER050C	RSM18	Mitochondrial ribosomal protein of the small subunit, has similarity to E. coli S18 ribosomal protein			4		GCTGGGCAAAGCAATTCGAAGGGCCAGAATGATGGGCGTTATTCCAATCCTTAGTCGTCTCCCTGAAACT
CC_OL_005_E04																							CCATCACAACTATGCCCAATACCTAATTCTTTTTGTATGACCTAGGCATTAGGAGAGTCTGAGAAAGGTA
CC_OL_005_E05	CC1G_11418																				0		GTTAACACGCATGCGATTCTCTCGAGGTTCCTTCGACTCTCTGAACTGGACGTGGCTCAAGGAGCTTTCA
CC_OL_005_E06	CC1G_01523																				0		GCTGGTCAGGGATACGGCTTTTTGCACTACAAGTTGACGCTGCCGGATATCACGTATGCCGTTATGGATT
CC_OL_005_E07	CC1G_15724															YPL175W	SPT14	UDP-GlcNAc-binding and catalytic subunit of the enzyme that mediates the first step in glycosylphosphatidylinositol (GPI) biosynthesis, mutations cause defects in transcription and in biogenesis of cell wall proteins			0		TTGTCGTGGGTGGAGATGGCCCAAAGCTCATAGATCTTCTCCAAATGCGGGAGAAATACAGGCTGCAAGA
CC_OL_005_E08	CC1G_06573																				0		ACTGTCCTATACGGCACCTCAATCCCCCACGCCTCACAATGACCCCTTTGTCCGACTCTTCCAATGCTGC
CC_OL_005_E09	CC1G_04105																				0		CTTCAACGAAAAGAAATCTCTTGATTCATCGCAAGGGAAGACTTTCAGCCTGAACTACCTCCATCTCGAC
CC_OL_005_E10	CC1G_05740																						TGGCTCATTCCTGATAACACTCCGGACCAGATATTTGACTTCGCCGCCCTTCTGGGAAGGCAAACATTCT
CC_OL_005_E11	CC1G_13961																						ATATCGCTTACGTTAGGGGCAAGCTGATACGAATACGGGAGGAAGCCTATTCTCCAGACGCTGCTCAACA
CC_OL_005_E12	CC1G_08166	+																					TTCTAAGCAATCTACTCCCGCAAAGCCCGTTGGAAAGAGTCTTCTATGGCAATCGACGACTACGACACCC
CC_OL_005_E13	blank																						0
CC_OL_005_E14	CC1G_09293																				0		AGAATGGACCACCATCGTTGTTCTTTTCCATCAATAACATCGACGCTGAAGCCCCAGAGACCCTCAGGGT
CC_OL_005_E15																							GTCCCAGTACTCATCGTGGTTAGCTTGCAGCCACTCAAGAGCTTCCAGGACTTTGAACATCGTCGAGCTC
CC_OL_005_E16	CC1G_07595																				0		CCCTACATTATTTCTGGACACACGGCTGGTGGATGCTTTGCTATTGCCGAGAAGCTGGCAGATGAGATGA
CC_OL_005_E17	CC1G_13942												+								2		CCAACAATGGAAAGGCATACTTCCCGCCGTTTTCGAGAGGAGAAGATTTGAAAATACTTCCGAATGGAAT
CC_OL_005_E18	CC1G_08329															YPL059W	GRX5	Hydroperoxide and superoxide-radical responsive glutathione-dependent oxidoreductase; mitochondrial matrix protein involved in the synthesis/assembly of iron-sulfur centers; monothiol glutaredoxin subfamily member along with Grx3p and Grx4p			2		GAGAGCGGTGGTACAGATCCTGGACATGTACGAAGTCCCTCCGGAGAAGATGCAGACGTATAATGTGTTG
CC_OL_005_E19	CC1G_00058												+			YDR232W	HEM1	5-aminolevulinate synthase, catalyzes the first step in the heme biosynthetic pathway; an N-terminal signal sequence is required for localization to the mitochondrial matrix; expression is regulated by Hap2p-Hap3p					ACTCAAGCAAGTCAATGTTCTTCGGGTAAAGGAACGCTTCGCTGAATTGGATATTCCCGTCATCCCCGGC
CC_OL_005_E20	CC1G_06193																				0		TGTTACAGAAGCCACTAATTACACCGATTTTCAGCTCACCTATGCTCGCACTGCCCAGGGGAACTTGCAG
CC_OL_005_E21	CC1G_04723																				0		AGCTGTGCACAAGGACTACCACTTCTACCGTGGCTCGACACACTATGAGACGAATAATACAATCAACGTC
CC_OL_005_E22	CC1G_12859	+													+						0		ACCACCCATCAATACTGCTACCAAACCTGTCCCTGATCTACACGTCCTTTACGAAGATGCCGCGCTCATT
CC_OL_005_E23	CC1G_05062																				0		GAACCGCTGAAAGAGGCGTTTGGGAGGGTGTTTAGGTTGAAGACGTTGAGGCATGTGGATATTAGGTGTG
CC_OL_005_E24	CC1G_04003																				0		CGATGCGAAAGCGGAGAAGGTCGCGGCGAGGATTCGTCGAAACAAAACTGGTCAGACTCCTAGGAAATCT
CC_OL_005_F01	CC1G_04974																						ATATCTGAACCTCGCGTTTGAGAGGGCGAAGACGCATGGTGATTTGCAGGATTTGTATCGACGCAGTGAC
CC_OL_005_F02	CC1G_14835																						TCGAGATCAAGATGCGACGGGAGAAGATTACTGGGTTGATGGAGCGCATGGACTCTGAGTATGCTGCTTT
CC_OL_005_F03																							TACACGCTCTGTGACTCCGTCTGTCTGAGGGTGGAACAATGTAGACATTAGGAGTTTCGTTCCCAATAAC
CC_OL_005_F04	CC1G_08307	+														YDL014W	NOP1	Nucleolar protein, component of the small subunit processome complex, which is required for processing of pre-18S rRNA; has similarity to mammalian fibrillarin			3		GGACGAGTGTTAGTCATGTTGCTGATATTGTTGGGCCGGAGGGAATTGTATATGCCGTCGAGTTCTCTCC
CC_OL_005_F05	CC1G_10085																				0		TTGCTCAAATGTCTACAAGAGATAAACGCCGATCGCGACAAGGCTGACCTAGCCGAAGGAACGATGCTCC
CC_OL_005_F06	CC1G_11835															YDR188W	CCT6	Subunit of the cytosolic chaperonin Cct ring complex, related to Tcp1p, essential protein that is required for the assembly of actin and tubulins in vivo; contains an ATP-binding motif			2		AGATGTTCTCGGCTGGGCTGGTTTGGTCTACGAACACACGCTGGGAGAAGAAAAGTACACATTTGTCGAG
CC_OL_005_F07	CC1G_04099																				0		TCCGAGTTGTTCCAAGGAGTAGAGGGCTATCTGAGCGACGCTGCGAATGTTGAAGTTCGCTTCAGGCACC
CC_OL_005_F08	CC1G_00199																						AACAATCCCTCTTATTCTCTACACCAGTTCCTGATCGGCATGACACGAAAACCGAGTACATTCGCCCCGC
CC_OL_005_F09	CC1G_01186															YDL087C	LUC7	Essential protein associated with the U1 snRNP complex; splicing factor involved in recognition of 5' splice site; contains two zinc finger motifs; N-terminal zinc finger binds pre-mRNA					AACGTGCCCTCACACCCTGTTCACAAACACCAAAATGGATCTAGGCGCATGCCCCAAGTCACATACCGAG
CC_OL_005_F10	CC1G_00023																				0		GCAGGCACTTCCAAAGCACGGAAACCACCTGCAAGAGATCCCGACGACTTTTATGTCTATACGGATGATG
CC_OL_005_F11	CC1G_14707																				0		CATTCACGGTCCTGACAATCGCGTAGAGTACTGCGTAAAGAGAGTCGATCCCGACGGAAAAACTAGGTGA
CC_OL_005_F12	CC1G_09572												+		+	YDR155C	CPR1	Cytoplasmic peptidyl-prolyl cis-trans isomerase (cyclophilin), catalyzes the cis-trans isomerization of peptide bonds N-terminal to proline residues; binds the drug cyclosporin A			0		TTTTCGGCGAGGTCGTTGAGGGTATGGACCTCGTGAAGAAGATTGAGGCTCTCGGCACTGCCTCTGGCAA
CC_OL_005_F13	CC1G_15599		+		+		+		+					+							0		GTTTGGGTGCCATTGCGCTGAGTTGTTCAGGGGGTTCCCTGCGCTCGGCTAGGTATGACAAGTTTGTTTA
CC_OL_005_F14	CC1G_05223	+				+		+													7		AACGTGCTCTCCTTTGTTGGTCTGGCGTTTATTAGTGCCAGTTTGGGTTTGCAGGGTGTCCTTGGCAAGA
CC_OL_005_F15													+										ATTGACACCCCCACAAAGCCTGCTTCTTCTGTATCCACCTCGCCGAAACATCAGAGATCCGCGGAAAGGG
CC_OL_005_F16	CC1G_08077																				0		GGTGCAGGGAGAAGGGCCTAAAACGATTGGCTTGCGTTGAGGTGCTGGAGGTTGAGATTTACAAATTCTG
CC_OL_005_F17	CC1G_00703																				0		TATGGTCGCAGACCGACGACGTCGAACTTCAGTACTCAAACATTGGGCAGTGGATCAAAGTGGAAATCCC
CC_OL_005_F18																							TGAACGACGAGGAGCAACTGAGATCGTTGGGTGGATCAACGCAGACAACGGACACGGGAAGAAGGATGGG
CC_OL_005_F19	CC1G_06381		+																		0		CCTCACGACAATCCCAATTTGCTATCGGACTACGGTTTACTCCAAGCAGCTATACAAGCCGGAAAAGAGG
CC_OL_005_F20	CC1G_04959																				0		AGTGGGGAGTGGAAGGATATCATGCGTTGGAATCAGGGGAGATGGGCTCATTTGTTAGAGCAATGTCGCA
CC_OL_005_F21	CC1G_07610															YCR023C		Vacuolar membrane protein of unknown function; member of the multidrug resistance family; YCR023C is not an essential gene			7		CGTTGTCGGTTCGCAGGACCCCTCAGTTACCCAAAATCCCTCACCAAAACCTTTACCGAGCGAAAAGCAA
CC_OL_005_F22	CC1G_11456															YLR216C	CPR6	Peptidyl-prolyl cis-trans isomerase (cyclophilin), catalyzes the cis-trans isomerization of peptide bonds N-terminal to proline residues; binds to Hsp82p and contributes to chaperone activity			0		TTCCCTCGCCGAATCAACAGCAGAAGCACAAGACGGTGATCCTTATGAGGACTACCCAGAAGACGAGGAT
CC_OL_005_F23	CC1G_01895															YNL240C	NAR1	Nuclear architecture related protein; component of the cytosolic iron-sulfur (FeS) protein assembly machinery, required for maturation of cytosolic and nuclear FeS proteins; homologous to human Narf			0		CAAACGACCTGGCCGAGAGAATAGTGGAAGAGATGTGCAGATCGAGTGAAGGTGGTGATTACACCGAGTT
CC_OL_005_F24	CC1G_09353																						AGGCTGGTCCTGGATCTTTATTCTGGAAGGAACATTGACTATGGTGCTTGGACTTATCGGATGGATGTTT
CC_OL_005_G01	CC1G_00768																				4		GGAACCGATGACCCATTACCGGTCTACATTCCTCACTGTTCGACCACCAGGTGCCCTAGAGCAGCTTTTG
CC_OL_005_G02	CC1G_07644																				0		CAAGTGCCGCCCCCATGTTGGTCACAGAAATCGCCTACCCCACCCATCGTGCTGCTTTGACCTCTACCTA
CC_OL_005_G03	CC1G_10243																				0		TCATCAAGTTCCGACGCCGACAATTCCCTGTTCGATTGGCCTTCGCACTCACCATTAACAAAGCTCAAGG
CC_OL_005_G04	CC1G_00812																				0		TTTATTTTCCACTTATCCGGGGCTCCACCCAACGTATTCATTCCCGACTTTCCAGCCACCTCCGAGTCTA
CC_OL_005_G05	CC1G_02361																				0		CCAGATTGACTATTAATATACGTGAAGTCATGGCTTCGCGGCAGGAGCAGTTCCCCCCAACCGATATCCA
CC_OL_005_G06	CC1G_03210															YBR239C		Putative protein of unknown function; green fluorescent protein (GFP)-fusion protein localizes to the cytoplasm and nucleus; plays a role in restricting Ty1 transposition			9		ACTCAAACCCGACGGCACACCAGTCCCAGCGACGTTCTGTTTCTCAATACGAAGAGACCTATTCGATCTT
CC_OL_005_G07	CC1G_10389																				0		AACTGAGTGCTCTGGAGTCTTCTACTCTTGATTATGCTGTTACGGCCCCTCGACATGACTGGACGTACGA
CC_OL_005_G08	CC1G_12448																				0		CGAACGCGACCGATATCAAGCTCCTGGTTATACAGAAGATCAACCGAAACCCGCATTTTCGAGCCCTCTT
CC_OL_005_G09	CC1G_02035															YNL129W	NRK1	Nicotinamide riboside kinase, catalyzes the phosphorylation of nicotinamide riboside and nicotinic acid riboside in salvage pathways for NAD+ biosynthesis			0		TACCGGAGGACCATAGAAGCCACGACCATCTCAATCTCCAAAAGGATATTCCAGTCGACTCAGAGTCCGC
CC_OL_005_G10	CC1G_01607																						CATCTCGTTCGATGCCGACAAAGATTTCTGGGGTTCTGGCCTAATCGGTTATTCGTCCTTCCCGACGTAT
CC_OL_005_G11	CC1G_07297	+													+								TTGAAAGCGGCGATGCCAACTTTGCTTGGGGATGGTCGTTCTCTTAGGTTTGCTGTCGAATGGAACGAAC
CC_OL_005_G12	CC1G_05107												+								0		CGGTAGCAGAAGGAGGCCTCGGTTTCTCCACGTCCCAAATTGGATATGCCCTAGCGATGGCGGGTTCTAG
CC_OL_005_G13	CC1G_07854		+		+									+									ACTTCTTCAAGTATTCTGCCTGTGGCCACATCGTTACTACTGGCCGCCAAGTTGCCCTGGACGAGCGATA
CC_OL_005_G14	CC1G_02700															YDR536W	STL1	Glycerol proton symporter of the plasma membrane, subject to glucose-induced inactivation, strongly but transiently induced when cells are subjected to osmotic shock					TATCCCAATAATCTGGCTCATCTACCCCGAAACCGCCAACCGCCACCTCGAAGATATAGATAAACTATAC
CC_OL_005_G15																							CCGGTGAACTACTCAAACGATTCATGATCCCGTCTAGCAGTGCAACCCCCTGGTCATGGGACGTTTGGGA
CC_OL_005_G16	CC1G_02430															YHR176W	FMO1	Flavin-containing monooxygenase, localized to the cytoplasmic face of the ER membrane; catalyzes oxidation of biological thiols to maintain the ER redox buffer ratio for correct folding of disulfide-bonded proteins			0		ATACGAGTACTCGTTTCCGTTCCTCGATTCATCCGTTCTTCATTATCCTACATCAAGCGATGGCGCGTCA
CC_OL_005_G17	CC1G_11278																				0		TTTCGAGTGGAACATTTCCGAAAGGTGGCGCTTCTGCTGGATGGTCTATTTCCGGAGACAAAGGTGGTCA
CC_OL_005_G18	CC1G_04285															YHL013C	OTU2	Protein of unknown function that may interact with ribosomes, based on co-purification experiments; member of the ovarian tumor-like (OTU) superfamily of predicted cysteine proteases; shows cytoplasmic localization					ACAATATCCCATCGCGGGTAGTCCGGGTCAGCTACCACAAGAGAATGTATGGCTTAGGGGAGCATTACAA
CC_OL_005_G19	CC1G_02733															YFR050C	PRE4	Beta 7 subunit of the 20S proteasome			2		ATGTGGATTTGTTGGGTACGACGTATTCTGCATCAACGCTTGCGACTGGGTATGGTGCCTACCTTGCGCA
CC_OL_005_G20	CC1G_03670												+		+						2		TCTACTCGAAAGCCGCCACGTTGGTTGTCCAGTATTATCTCGAGGGGGGACGTTTCTACCAAGAATCGTT
CC_OL_005_G21	CC1G_05528																				0		CCGGCAAATACTACATCTTCGTCAACTCCAAGACCGCCGAATATCTCCAATACGAACTCACACCCTCCCT
CC_OL_005_G22	CC1G_12976															YDR419W	RAD30	DNA polymerase eta, involved in the predominantly error-free bypass replication of DNA lesions, catalyzes the efficient and accurate synthesis of DNA opposite cyclobutane pyrimidine dimers; homolog of human POLH and bacterial DinB proteins			0		ATCGAAGGCTTTTTCAAATCCAAGCCGCCAAGTAAACGACAGAGGGAAGATGACCACGGAGGCACCTCTA
CC_OL_005_G23	CC1G_09327															YNL286W	CUS2	Protein that binds to U2 snRNA and Prp11p, may be involved in U2 snRNA folding; contains two RNA recognition motifs (RRMs)			0		GGAGAACCTTCTGGATGAAGCGGAATTGAGACTTGGGGATGCTTCTACTGTAATGAGGGTCCGGCAAGCA
CC_OL_005_G24	CC1G_04384																				0		GTTAAAGAGTCGGTGCATTCTCGATTTACGGACCCTCGTGAGGTTCTTTGTGGGCAAGGACGTTGGGTAT
CC_OL_005_H01	CC1G_07572															YLR340W	RPP0	Conserved ribosomal protein P0 similar to rat P0, human P0, and E. coli L10e; shown to be phosphorylated on serine 302			4		GCCGGTACTCGTGTCGGTCCCTCCGAAGCCGCTCTCCTCAACATGTTGAACATTTCTCCCTTCACCTACG
CC_OL_005_H02	CC1G_07510																						TGCGGCGTATAACAGTTACGGTTTGGCGAACGCCGTAGGAATTGCCGAAGATCATCAGGGCTTCATCCAT
CC_OL_005_H03	CC1G_09391	+																			0		CCTCAAGATAGCCACGGTCGCGTATTCGAGAAGATCAGCCGCCTCTGGGGCACGATTCGAGGCCAGGCCG
CC_OL_005_H04	CC1G_02872												+			YDR128W		Putative protein of unknown function; YDR128W is synthetically sick with cdc13-1			0		TAGCAAAGAATAAGGATATCCAAATGCTCGCCATGCTCTCAGTAATGGTCCTCCAAACCCCTCACGGGGC
CC_OL_005_H05	CC1G_01363																						CTCTTCCACAACGTCAGTCAAGAGTATATTCGGCCCTATCGCATCGGATCCGGAGACAATCGTCATTCGT
CC_OL_005_H06	CC1G_07851																				0		AATATAGGGTTACAATTGCAGGATCTGAACCAATCCACAGATGCTCCTCCGGACGTGCCAGACAAGGCAC
CC_OL_005_H07	CC1G_10341																				0		CCCTTCATGCAAGAAGAAACTTTCCAATAACACGCTGTTGTTCCTGTCCAAACCATGCGGCCACGTAACC
CC_OL_005_H08																							GCGGTCGTCTGACGATGTGATCGCTGATACGAGACTGCCACACCTCGAAGGCTGCCCTTGCCTACCTGAG
CC_OL_005_H09	CC1G_02315															YKR017C		Putative protein of unknown function; contains a RING finger motif					GAATCCCCATTAGAGCCTGAGAACATCCCCACCCTTCGTCAACAAGTGACGAACAAGACGGTTTATGTCC
CC_OL_005_H10	CC1G_05661															YGL206C	CHC1	Clathrin heavy chain, subunit of the major coat protein involved in intracellular protein transport and endocytosis; two heavy chains form the clathrin triskelion structural component; the light chain (CLC1) is thought to regulate function			4		AAGAACAAGCCGAAGCTGACGCACCTATCATCAACCCTGGTGGCTTTGGAAACCGACTATTGCTCGAGAA
CC_OL_005_H11	CC1G_00840															YHL007C	STE20	Signal transducing kinase of the PAK (p21-activated kinase) family, involved in pheromone response and pseudohyphal/invasive growth pathways, activated by Cdc42p; binds Ste4p at a GBB motif present in noncatalytic domains of PAK kinases			0		ACGCAGCGGCACCAAATCCAAGAAGGGGGTCCTCGGTTTCATGTCTGAAGTTTTCAATCCAACGAAACGT
CC_OL_005_H12																							AAGAGCCCGAAAGACACTCGAACGTGAGCATTGGGATCCAAAAGGTGTAGAAGTTATCAGGTACACCGAG
CC_OL_005_H13																							GGTCACTCCTGGAAGGCAAAAAGGTGTTACTGGTTCTGCTCCTGTTACCATATAAAACGGCGAACACCCA
CC_OL_005_H14	CC1G_08685																						TTGAACCCACAGGGTGTAGGCACTGAAGCTCAGACCCAGATCCAAGTATACGAGATAGAATCAAGGGGAC
CC_OL_005_H15	CC1G_02154																				0		GGGCCGAGTTTTCTACACTCGCGAAGACGCAAGGCGACAGAACGAGCATCGCCGTTTGGTTATTTGCGGA
CC_OL_005_H16																							GTATAGACTCAATGTTGGTATATGTACTTGGGGATGTGATCCCCAGAGATGTACATTACATTCTTGGTAG
CC_OL_005_H17	CC1G_09275															YER020W	GPA2	Nucleotide binding alpha subunit of the heterotrimeric G protein that interacts with the receptor Gpr1p, has signaling role in response to nutrients; green fluorescent protein (GFP)-fusion protein localizes to the cell periphery					GAGTTCCAGCTCAACGATTCCGCCGTCTACTACTTCAACTCTATCGACCGTATGAGTGCGCCTGGGTTGG
CC_OL_005_H18	CC1G_06563										+		+		+	YLR300W	EXG1	Major exo-1,3-beta-glucanase of the cell wall, involved in cell wall beta-glucan assembly; exists as three differentially glycosylated isoenzymes			9		TTGTACAAAGATAGAACTGGAGTTGTCCCAGCTATCGCACCTCTCAACGAGCCTGCTGGTTTCTTCGGAG
CC_OL_005_H19	CC1G_08681																				0		CGACTTGCACCTCCCAATCCTTATTTCCTTACAACACCTGCTTCCGAGTTGAGACTTTCAGAGGTCGGAG
CC_OL_005_H20																							GCTCGTCGGAAAAGTCCGTATCGTATCGCACTCCAAAGGCTATGTAAAGACAGACGAAGCTTCTCTTTCG
CC_OL_005_H21	CC1G_15845															YOR151C	RPB2	RNA polymerase II second largest subunit B150, part of central core; similar to bacterial beta subunit			1		TGCGAGATTCATCCCAGTATGATCCTTGGTATCTGTGCCAGTATCATCCCTTTCCCCGATCACAACCAAG
CC_OL_005_H22	CC1G_06441																				0		CCTTCTTCATTCAAGGCTCCAACGAACTCCTGTGCTCGCATGTTTACGCATACGCCGGCTACGAGCAATT
CC_OL_005_H23	CC1G_03314																				0		AAAGACGAGCTGAACGCAAGCGTATTCGAAGTGAAAAAGCGGGTCACAGCACGCACGTTGTCGACAGAAG
CC_OL_005_H24	CC1G_00737																				0		CGGGGCGGGAATGATCTAGCGTATGCCTTCCTTTACTCGAATTTCTTGAACTCGGAGATCAGACGGGATA
CC_OL_005_I01	blank																						0
CC_OL_005_I02	CC1G_13653	+														YLR309C	IMH1	Protein involved in vesicular transport, mediates transport between an endosomal compartment and the Golgi, contains a Golgi-localization (GRIP) domain that interacts with activated Arl1p-GTP to localize Imh1p to the Golgi			0		ATTTGAAGCAATCGCTGGTGGAGAAGCAGATCGAAGACTACAAGAGTCGAGAGAGCCAGTTGAAGCAGGC
CC_OL_005_I03	CC1G_02784																				0		GGAGTGTGAAGAGTCTTGCTAGGATTGGGAGTTGGGCGCAGCTTGGTTCTGGGGGTGGGGAAGGTGTTAG
CC_OL_005_I04	CC1G_11454				+							+											CACCTTGAATCGCATGGCAAACGAGCCCTACCGTTATGTTAGGGAACAAATGGCTTCGGGTCGCGCTGAA
CC_OL_005_I05																					0		AATGTCGCATTCCATATCATGAGAGACCAAAAGGACCTACCAGACCCTAACCACCCAATGACCCTCTTCT
CC_OL_005_I06	CC1G_07843																				0		TACTTGGCTGTGGATGTTGGAAGAGCAAATTCAGACCTGGCTGCCCGCGATTCCTCTAGGTGAATTACAG
CC_OL_005_I07	CC1G_07412															YLR084C	RAX2	N-glycosylated protein involved in the maintenance of bud site selection during bipolar budding; localization requires Rax1p			0		TTCGTTCGATGGGAATGGTGAGGGAGAGTTGCCCATATCTGCGGGTGATGAGTTGGAAGTTTTGGATGAC
CC_OL_005_I08	CC1G_15483																						AACCACAGAGTCCAGCTGTTCGCTAACCCACCTCACACTCATTTCCTCACCCTATCGTGGATCGCTAATA
CC_OL_005_I09	CC1G_05239																				0		CGAGACGTATGGATTCCAACCACTTGCTGTACTCTACAGCCTGCCTTATGCCTTACTCATGTGGGGGTAA
CC_OL_005_I10	CC1G_07360																				0		AAGAAACCCGCACCGATCAGGCTCCCCCATCCCGGCACGGTTCTCGACAATCACATAGCAGAAGGTCCTC
CC_OL_005_I11	CC1G_04196															YMR048W	CSM3	Protein required for accurate chromosome segregation during meiosis			0		GCGAAACTGTGACCCGAATAGAGAAGCTATGCAGGACAAAGATGCTCATGGGCCATTTATCAAGATGGAA
CC_OL_005_I12																					0		TGCCCTTTGAACAGTTTGGGTTCCTTGATGGGGCTTCACGTAGAAGCGGTCTTGTTGGTGAGCTTGTCAA
CC_OL_005_I13	blank																						0
CC_OL_005_I14	CC1G_06254																				0		GGGCGACACTCGTCCACTCGGACATTGCTAGTAAACACAAACACCATGTTTCGGCTCTCAGTCAACTTGT
CC_OL_005_I15	CC1G_12372																				0		TGGGTGGCAGTTGGGGTAGCATCCCATCCGAGTCCGACACGGACATTGATCAGCATGAACGAAATTCCAG
CC_OL_005_I16	CC1G_10835																				0		GTCAATTATGGCGGTGCATGGGGCGAGCAGTTTGTCTGGGCTAATGAAGATATCCCCAATGATCCCAAGT
CC_OL_005_I17																YNR026C	SEC12	Guanine nucleotide exchange factor (GEF); glycosylated integral membrane protein of the endoplasmic reticulum, important for the initiation of transport vesicle budding from the endoplasmic reticulum through activation of the GTPase Sar1p			0		TAAATTCAACCCTGCCGGGACCCTGCTCGTTTCTGGAAGCGCCGACAATTCCATTCGCGTCGTTAGTATT
CC_OL_005_I18	CC1G_00919																				0		GATGGTGGAGATACCGAACAACCTTCCTACTGGACAGCCACCAGCGAGTACAGACTTTTTCTTTGCTGAC
CC_OL_005_I19	CC1G_06643															YOR254C	SEC63	Essential subunit of Sec63 complex (Sec63p, Sec62p, Sec66p and Sec72p); with Sec61 complex, Kar2p/BiP and Lhs1p forms a channel competent for SRP-dependent and post-translational SRP-independent protein targeting and import into the ER			0		AGACGAAGCGGGTGGTTAAGATGAATGATGAGAAGGATGAGGCTTTCTTGCTTGCCAAGGGTGACGCTGA
CC_OL_005_I20	CC1G_02113																				0		TGATCCTGACCCATTTCACCAGGTGATCGCCCACTACGAGAAACAAACCAGCGATTTTGTCGACAAGTGG
CC_OL_005_I21	CC1G_09443															YER154W	OXA1	Mitochondrial inner membrane insertase, mediates the insertion of both mitochondrial- and nuclear-encoded proteins from the matrix into the inner membrane, interacts with mitochondrial ribosomes; conserved from bacteria to animals			4		GTCTTATTGCATGGTCCTATGAGCTTCTCCAAGTCTCCACCGGCCTCCCGTGGTTTTACACCATCATTGC
CC_OL_005_I22	CC1G_03475	+																			0		CTGGGATGTACAACGAGATTACTGGTTTGAGGAGGAGAGTTGCCGAATTGGAGGAAGCACTTCACGAGAG
CC_OL_005_I23	CC1G_01437																				0		CCAACCTGCGGGCCAAGTCTGATGCTGATATTCTGCGGGATGCAAAGCTTGAGGCCATGGGCCTGCCACC
CC_OL_005_I24	CC1G_01562																				0		TCCCAGATGACTTGGTTGATTGGTTTATGGCTGCCCTTTTTGGTCCGCATACCACACAGAACGAGGTTGA
CC_OL_005_J01	CC1G_11674						+		+												0		AATCCGATCGAGATGCAGTGGGGTTGGGTCAAAGGCCGTTATCGTGCACTGGCAGATGGCAGCTGGCAAC
CC_OL_005_J02	CC1G_00975															YCL032W	STE50	Protein involved in mating response, invasive/filamentous growth, and osmotolerance, acts as an adaptor that links G protein-associated Cdc42p-Ste20p complex to the effector Ste11p to modulate signal transduction					GTTTGATGTCGTGGTTGGCGATACATTCATTATCTTGTCGCGGGCTAAAGGATGGTGGGTAGTGCAACGG
CC_OL_005_J03	CC1G_05818															YER082C	UTP7	Nucleolar protein, component of the small subunit (SSU) processome containing the U3 snoRNA that is involved in processing of pre-18S rRNA					GAAGAATAAGGCGCTTAAGAGGTATCTTAGGAAGCAGAGGAAGAACGTGGTGGATCCCGCTGTGATCGCT
CC_OL_005_J04	CC1G_05478																				0		TGGAGGATACCAAAGACGAGATCTTTGGCGACTTGAAGAGGAAGATTCAGGGCAAGAGCGACGCAAAGTC
CC_OL_005_J05	CC1G_07039																				0		GGAACTTCCCAGATCAACCGCTTTGTTTGCCCCAACCTAGGGCACGAATTTTACTTTCATCCAGGTACGC
CC_OL_005_J06	CC1G_03046																				0		CCAGCTGCACAAACCAGGGCGGTCAGCACGCCGTTGGTTTCTGTCCAAAGGATCCTGCGAACGTTCGATG
CC_OL_005_J07	CC1G_06744																						GCTCGTCCCCAGCAAGCCCATGTGCGTTGAGTCCTACAACGAGTATCCTCCTCTCGGTCGTTTCGCTGTC
CC_OL_005_J08	CC1G_07780																				0		CGAGTGCGATGAAACACAGCCAGTATTCACGACTTACGGGCAATACAACTTCCTGAGGCAAACATACGCG
CC_OL_005_J09	CC1G_09447																				0		GATAGGAGTCCACACCTTTGTCTACGTGAACCTCTTGATCTCTTTGGGCATCTTTTTTGCGGGTTTGGGC
CC_OL_005_J10																							CTCTCTCTGTCCGGGTGGTATTGTAGTTGTCTTCAGGTCCCTCGTACCAATTTATCCCCTAGGTAGTTAA
CC_OL_005_J11	CC1G_15139																						TTGTGATCCTCTACTCCTCCGTTCCCGGGGGTTCTTCTGCCCCCTTCAACTTGGGAACCGTACGTTCAAC
CC_OL_005_J12	CC1G_09900															YDL091C	UBX3	UBX (ubiquitin regulatory X) domain-containing protein that interacts with Cdc48p, green fluorescent protein (GFP)-fusion protein localizes to the cytoplasm in a punctate pattern			0		AGAAGAAACACTCGAATCCCTCATCCCATCTTACTCAGCCTCGACTTCTACAACATCCACCCAATCCTAC
CC_OL_005_J13	CC1G_01536																				0		AGAACTGTACCGCGTTGTGCATATGCTGACTCTGGAGACTGAAAGGCTACGACAAAGCCACTCGAGCAAC
CC_OL_005_J14	CC1G_03255																				0		GGATGGGTCCACTCTGACTACCGATAAGGACCGCACTTCAGATTTATCTTTACCAACGGACAGACCTACT
CC_OL_005_J15	CC1G_14345																				0		GTTAATCCAATTCCAGTACGGACTGCTGGGTCTTTGGAAAGATATCAATGTCCTCATTAGGAGGCGTTCC
CC_OL_005_J16	CC1G_03391																				0		TTCAACTGCTGCAACTCCTGCTCCGGCTGCAACTCTGGGTACGCATACCTTCCTGCCCCACTCACCATGA
CC_OL_005_J17	CC1G_07332																				0		TTGTCTAGAGCTGATATCCTTCGTATCCGTGAAGAGCAAAAGGGTGTCCTGCAAGAGTCTTCCTCCGCGT
CC_OL_005_J18	CC1G_13709																				0		TCCCCAGATCTTCTTCCAGCCAACGACTTTCCGTACTCGGACTGAGCGTCGCCACCATAGGACACCTCCT
CC_OL_005_J19	CC1G_14401																				0		GGAACACAGTGGATATGTCGATAACGACGAGTTTCATGTGGCACGCATAGTTCAGGCTCGTTTGGACAAA
CC_OL_005_J20	CC1G_00156																				9		CCGTTATCAGGTACACCCAGACCGAGCACCCCAACGCTATCCCAACCGATGACACTTTGGGAGGCGACGA
CC_OL_005_J21	CC1G_13699																				0		CTCAAAGACGCTGTTATCAAGCATGTCGCGGATGCGAAGAGTCACTACAAATGGCTTACTGGAGGAGTCG
CC_OL_005_J22	CC1G_03156																				0		AAAGGTTCGATGCTGTTGTCGCCGCGGTACGGGAAAGAGAGGGGCTTTCGATGGTCGCGTTTAGGTTCCA
CC_OL_005_J23	CC1G_10519																				0		AATCAGAGACACATGGGTGGCAAAGGTCGGGTGGCTTGTTGGTCGGAGCCTTCGAAGCTCTATGGATGGA
CC_OL_005_J24	CC1G_05999																				0		GTCTGCCAACCGTTATTTGCAGACCACAGTTTTGAGGAACTTCGGGTATTCTTTATGCTCGCGGGCAAAG
CC_OL_005_K01	CC1G_04677																				0		ACCTGTTGGCACTTCAAAGAGGCCCGACAGATTGCCATCGAGCACCTTGACGACTTCCCCCTCACCTCAA
CC_OL_005_K02																							ATGTGACGCTTGCTGTTTGCCTTGCATGCTGTGCATTGGGCTCTTCAATTGTTTGACAAAGCTCGAGTTC
CC_OL_005_K03	CC1G_08614															YPL054W	LEE1	Zinc-finger protein of unknown function			0		TTCGATCAACAATATGCTCAGTCCCAGCAACGCCAGCGCCGCCTTCTTGCCTGGTTTCCATTCTCATTAT
CC_OL_005_K04	CC1G_01351															YDL114W		Putative protein of unknown function with similarity to acyl-carrier-protein reductases; YDL114W is not an essential gene			3		TCGAAACCAAGGCAGCCTCCTGTTCGGTCCTTCACCTATGGATTGGGGCGAACAAATCGTCGTTATTACT
CC_OL_005_K05	CC1G_09835															YDL146W	LDB17	Protein of unknown function; GFP-fusion protein localizes to the cell periphery, cytoplasm, bud, and bud neck; null mutant shows a reduced affinity for the alcian blue dye suggesting a decreased net negative charge of the cell surface			0		CACCGCAGAGTCGAAGCCCTGAAGAATCACAAACGCTGGCAACCCATTATACCGCATTTGATGGATCACA
CC_OL_005_K06	CC1G_03588																				7		TTGAAGACCATCCGTCTGGTTATTACCTCGGTTTCCTTGTCTGCGCAGGTGTCTGTGCATTGACGGTTGT
CC_OL_005_K07	CC1G_09696															YNL172W	APC1	Largest subunit of the Anaphase-Promoting Complex/Cyclosome (APC/C), which is a ubiquitin-protein ligase required for degradation of anaphase inhibitors, including mitotic cyclins, during the metaphase/anaphase transition			7		TCATGTCAATTCAGCAGACAACAAATGCTATCTTCAAGCCCTGCGTCACCTGTGGGTTCTCGCTGTGGAG
CC_OL_005_K08	CC1G_14404															YLR196W	PWP1	Protein with WD-40 repeats involved in rRNA processing; associates with trans-acting ribosome biogenesis factors; similar to beta-transducin superfamily			3		ATTGAATTACGATGCCCGTACCCTGCCATCTAATCTCGAGACACCAAGCGCTGCAAGATTCACCCTTGCT
CC_OL_005_K09	CC1G_04016		+																		0		CTCGACAATGATGCCTCATCTTCTACCGATTCATCCGCCTCTAAAAACGGACTTGGTCTGGCTTTCGGAG
CC_OL_005_K10	CC1G_01876																				0		TCATGTTCGCCCGGGAGGGCGCCTCTGGCATTACCATCACCTATCTTCCAGAAGAAGAGACCGATGCTAA
CC_OL_005_K11	CC1G_15417																				0		TCCATTGGAAAGCGGTATGCACGGAACGACGAATTGGGTACACCCTTTGGCATTACGGTTGACTTCGCGT
CC_OL_005_K12																							AGTCTGTATCTTGATCCTTAAAACTTTGCAGGATACCAATTAAGTTTACCTTTATATCGTTGATTGGAAT
CC_OL_005_K13	CC1G_15581																				0		TGACGGATATTGAGTCTGGTTTCTCCATGAACCTTCGAGCGGTACTAGATGTGGTCGTACACGACCCGAA
CC_OL_005_K14	CC1G_09579																				0		TGTGGACTCCGGGCTTTTGAAGACAATGAGCGTGAACGATGGATGGATTTGGCGGCTGGGTACAATCGGA
CC_OL_005_K15	CC1G_05791	+																			0		CAAAAATACCCGGGAGACCCGTACTTCACGCATACCGACGACCCGCTTCATAATCTCGTTGACTCCATCG
CC_OL_005_K16	CC1G_11666																				0		CAATGTCCCATCGTAATTCCGTCCAGTGGCATATCCAGACTTCGACCCTACCAACGTCAGAGCATCTTCG
CC_OL_005_K17	CC1G_12121																						ACTTGGGTTATCCCGATGAAGTTCTCGCCTCTTGTCTGGATTTACGTCGTCTGGGCTTCTAACGCTGCTA
CC_OL_005_K18	CC1G_03795																				0		AGTAATCGGAAACATAGGCCAGCTCAGCACTGGTGTGGAAGCTGCGAGGAATGTAGTTGGTGGACTTTTG
CC_OL_005_K19	CC1G_14541																						TTTATTCCTACGGGAACGCGCTGCACAGAGAGATGGTTAGTAGACCCACCTCGCACACAAAGGCATCGGG
CC_OL_005_K20	CC1G_02280															YHR175W	CTR2	Putative low-affinity copper transporter of the vacuolar membrane; mutation confers resistance to toxic copper concentrations, while overexpression confers resistance to copper starvation			0		ATGCCCAAATGTAACCTCCACATGCTTTGGAACACCCAAATCTACGACACCTGTATAGTCTTCAAATCCT
CC_OL_005_K21																					0		CCCCTGAACTTCGGAAGAAGGGCGATGGTAGACGACTTCGGGACTGTATATTTGTTGGATATGGTGATGG
CC_OL_005_K22	CC1G_08462																				0		AGGCCTGGGCCCATTACCAGCTCGCTAAAAGTAGGTGTACCGTCAGAGCCATAGGTCGCAACGGTTGGCT
CC_OL_005_K23																							CATTATTTAAAAAAAATCGCGTCGCATTCAATGACTGAGCTGTGTGGTACAGGGGGGCGGACAGGTAAGG
CC_OL_005_K24																					0		ATGAAGACGCTCACTTTTCGTCGCTTCCACCCCTTTCACCTACTGCTATCATTGAGCAAGTCCAGGACTC
CC_OL_005_L01	CC1G_01498		+																		0		CGTCGATCGTTTACCGTCTGCTTCGCGCCAGCTCAGCACTTCGAAAGTCACTTCCAGGGTGGAAGGACTC
CC_OL_005_L02																							TGGAGCAATGTCGATCAAAGTCTGACCCACCAGGTGGCGAAGTGGAGTTCCCCCTTATGGAACCGGAACT
CC_OL_005_L03	CC1G_08224										+		+		+								CTTATTCTGGGCCATACGCCTTTGGGAATCCTCATTATTCTTCGGACTCTCCTGCTCGGAGTGGACGACT
CC_OL_005_L04	CC1G_15058	+														YPL217C	BMS1	Essential conserved nucleolar GTP-binding protein required for synthesis of 40S ribosomal subunits and for processing of the 35S pre-rRNA at sites A0, A1, and A2; interacts with Rcl1p, has similarity to Tsr1p			0		TCCGGGGACAGGTTAAGAAAGCCCTGCCAAAACCTGATGGAGCATTCCGAGCAACATTCGAGGACAAAGT
CC_OL_005_L05	CC1G_11918															YHR154W	RTT107	Protein implicated in Mms22-dependent DNA repair during S phase, DNA damage induces phosphorylation by Mec1p at one or more SQ/TQ motifs; interacts with Mms22p and Slx4p; has four BRCT domains; has a role in regulation of Ty1 transposition					CCCAAGGTTCAGGCTGGGTTGCAGTTGATGAAGAGTTTGATCGTTGCTTCTGGTGGTACCGTCTCTACAT
CC_OL_005_L06	CC1G_13239												+		+						0		ACTACCCCACATTCCACATCGGTTCACCCACCCTCTACCCAGGCCGGATGACAGACTTCGACTTGTCCGC
CC_OL_005_L07	CC1G_11086																				0		GCAGACCTGCTGCAAACGACTACCTCGAATGTCTCCACCATCCTAAAGAGACCCAACGAGCATTAGCCAT
CC_OL_005_L08	CC1G_04563												+										ATGCCTACCGCTATCACGACCTTTGCGCTCACTATCTTTGTGGTCCTATTCCTCGATGCTGACAAGCCAA
CC_OL_005_L09	CC1G_00905															YBL089W	AVT5	Putative transporter, member of a family of seven S. cerevisiae genes (AVT1-7) related to vesicular GABA-glycine transporters			9		ACGACCATGCACATGCTACTATGTCACCCCTCAAGCACACAATCCTTAGCAGCCTTATCATCGGCTTTGG
CC_OL_005_L10																							CGGGATGAGGAGGTTAGAAGGGCGAAGTGACCATCGACCAGTTCTTGGGACATTTGTAGCATACCTTTGA
CC_OL_005_L11	CC1G_00080															YIL103W	DPH1	Protein required, along with Dph2p, Kti11p, Jjj3p, and Dph5p, for synthesis of diphthamide, which is a modified histidine residue of translation elongation factor 2 (Eft1p or Eft2p); may act in a complex with Dph2p and Kti11p			0		GCATCCAATATCAGCATCCCTTACGTTCAAATTCTGCTCTCCGAGCTCTCCCCGGCGAAACTTTCCCTAT
CC_OL_005_L12	CC1G_09841																				0		ATGGATTTTCATCATGGAAGGTCTCTTCACCATCCTTTTGGGTATCCTCGCCTGGTTGTTCGTCCCCGAC
CC_OL_005_L13	CC1G_14554															YER059W	PCL6	Pho85p cyclin of the Pho80p subfamily; forms the major Glc8p kinase together with Pcl7p and Pho85p; involved in the control of glycogen storage by Pho85p; stabilized by Elongin C binding			0		ATGAACAGGTCAATGCGGCAGAAGCTAAAGGAACTCTCTGGTTCGAGGAGCAGAATATCCCACCTCAGCA
CC_OL_005_L14	CC1G_09541																				0		AGATGTCGCACCATCAGCCTCCTGAGACAGATTCAGACTTGGCGGAAGGGGATTCCGATTTGTTAGGCCG
CC_OL_005_L15	CC1G_02878															YOL033W	MSE1	Mitochondrial glutamyl-tRNA synthetase, predicted to be palmitoylated			0		AAGATGCACACGCTTCGCTCGCTACGGACCCTATCCTGCTCAAATCTGACCAGTTCCCCACATACCATCT
CC_OL_005_L16	CC1G_06696																						GTGCCCCAGCGGCAGAACCCTCACAGGCTACTGCCCTGGCCCTTCCACTGTCAGGTGCTGCTTGCCGTAA
CC_OL_005_L17	CC1G_08727																						GACAAGGTTCCTGACATGGAATTCATTGTGTTCCCTGGTTATTTCATGTGTCCCGCGAGCCAGGGTACTG
CC_OL_005_L18																							GGTCGGTACTATCTTGTCGTGTACTCAAGGCGTATGCAGTAGGGAGAACCCAAGCATTACGCAGGAGGGA
CC_OL_005_L19	CC1G_11651																				0		CCGGCGAGATGCTTCCGTCAAGGTTACAAGGCCAGAGGAGCTTAACGACATTCGAAAAGATTTGAAGACT
CC_OL_005_L20	CC1G_08581																						ATTCGGAGTATTTCGAAAGGGAGGATCGTCAAGGCGTTACATGGAGTATACAAGTGCAAGGCAGGTTCCT
CC_OL_005_L21	CC1G_00908															YJL140W	RPB4	RNA polymerase II subunit B32; forms two subunit dissociable complex with Rpb7p; involved recruitment of 3'-end processing factors to transcribing RNA polymerase II complex and in export of mRNA to cytoplasm under stress conditions			1		ATACTACGGACTCGGCGAGTGCCGTACGAGAGACTTTGAGAAGGGAGCCCGCCCTTACGCAGTTTGAGAC
CC_OL_005_L22	CC1G_01557																				0		GATCAACGCCCAGCCTGGTGCAACTCTGACTGATCGAGAATCTTACGGAAACGTTCACGGCATCTCGTAT
CC_OL_005_L23	CC1G_00669																				0		TTCACCGTGATCTAAGAGAGGGTCATATCAAGACCGACGACGACCACTTGCGAGAGTTTATGAAGCAGGG
CC_OL_005_L24	CC1G_06272														+						0		GGCAAATCTCAAAGCGTGTCCAACTGTCGAACTTGCTCAGCCTCATCTTAGTCGCCGCAAACGCAAACAA
CC_OL_005_M01	blank																						0
CC_OL_005_M02	CC1G_10432																				0		CGCTAGTGTTTGCAGATGGACCTCGGCATGTCGGTGACCCAAAACCTTGGCATACCATTTCTCCAGGTCT
CC_OL_005_M03	CC1G_10491																				0		CGCCGCATCCCGCGCGGCCTCAAAATGCGGCGCGGCTACGCCTTACAGCCGCCGCGCTTCGACTTTGGTT
CC_OL_005_M04	CC1G_14930																				0		AATCGTCGATAACAAGCACAACCTCCCATTGTCCTACTACATCGGTGTTTGCGGAATGCCCGGAAAGACG
CC_OL_005_M05	CC1G_03929																				0		GATAGAAAGCATGCTCAATTACAGCGTTGACGATGGATTTACAGTCCTTGGCCATCTTCACCAGGTCCAC
CC_OL_005_M06	CC1G_08865																				0		TGAACGCCGATCATTGTTTGCACGAGCTGGCTTCGTCCCTCGTTGGCCAACGTTATGGGTTCTTCCAGTT
CC_OL_005_M07	CC1G_10701																				0		GACAAATGTGGGGAAATGGTGCTAGATAAGGTGAAGAGTGGTTCGGATGTGTGCAGGTTGCTTCACAGCC
CC_OL_005_M08	CC1G_00069																				6		CTGCCCGTTTACACCAGTCATCGCAGGCAGGTTAACGACAAGGATATCAAAACGCATATCTTGGGTCCTC
CC_OL_005_M09	CC1G_10853	+																			3		GGCTGGGAGTACATTCCGCCTGCGTCTACCGCTGGTACGCCATTAACGACGTTTTGGTTGCTTTCAGGCT
CC_OL_005_M10	CC1G_08650																				0		TATCACTTCTTGGTTCAAAAAATTCGGAGAGGTGACGAACGTAGCTGTGGATCCTAGGGGTGGGAAGGCG
CC_OL_005_M11	CC1G_08299																				0		CAATTCCAATTGAAATGTGCTACTCTATCAAAGCCGCTTGAGCTCGGGCTGGACCTTCTTGCCACCACAC
CC_OL_005_M12	CC1G_03668																				0		CGTCCCAGCCAAGGAAGCGCAAAGACTTGATAGCGAGGTTGCGAGAGAAAACAGACATTTTAGTTAGGGG
CC_OL_005_M13	blank																						0
CC_OL_005_M14	CC1G_04054																				0		TATTCACCATGAACGTGGTCCAGGAACACACCACCGAGGTCTTGGGAGAGAGGAACAATGGAGTTTTCGA
CC_OL_005_M15	CC1G_03051																				0		TATGAATAGCTTCTCTCAGGCCGTCTGTCAAAATTGCTCGATTACTGCCAAGCAGAGCGTAACGGAGGGC
CC_OL_005_M16	CC1G_03065																				0		AGGTAGCACAGGCTGAGTTTTGTAAAGGGCAGAAGGAGGTGCGGAAGGATCTGCCTGGTTTCTTTGGTCT
CC_OL_005_M17	CC1G_10221																				0		TGGCGGGCGCTTTCTTTACGATCCTGGTACAGTGATTGTAGGGCTTGGCAGTCTCATCCGACACGGTGTA
CC_OL_005_M18	CC1G_12950																						GGCTAATAGTAAGGGTTCAACGACAAGGAGCAAGTCACGGGGTGGACATTCTAAGTCCACTGAGGGTAGA
CC_OL_005_M19	CC1G_08198																				0		CGAAATATGCTCAGATGCATATGGAGCAACTCCTGGTCTCTCTTCCTGGTATCAAGGAGCTGTACGAGGC
CC_OL_005_M20	CC1G_09748	+																			0		TGTCAGCACATCAGCAGACGCCGCGAGTGCTGTCGTCAATTCCACGAACTCCACTTCCAACGACAAGGGA
CC_OL_005_M21	CC1G_07741																				0		AAAATGTTGGACCCTCTATCCCTGCCGAAGGACATGGACCATCGCTGCGTAGTATCTATGACAAGGAGGA
CC_OL_005_M22	CC1G_01781																				8		ATACACTGATTCACCTTATTCTGCGTCTTCTGTCCTCGCCAACCCTCCTACTCCCTACGATGCCACTTCA
CC_OL_005_M23	CC1G_13335															YGR006W	PRP18	Splicing factor involved in the positioning of the 3' splice site during the second catalytic step of splicing, part of snRNP U5, interacts with Slu7p					CAAGATCCCTACCCAGCGACATGCTCGCCCGAATTGCAGAAATCGTCCACTTTACCCAAAAACGACAGTA
CC_OL_005_M24	CC1G_00462															YER045C	ACA1	Basic leucine zipper (bZIP) transcription factor of the ATF/CREB family, may regulate transcription of genes involved in utilization of non-optimal carbon sources			0		ACTTTGCCTACCATGCCCCTCCACAGCCCAATCACGATTCCTCTTATCACCAAGCGAATGGTCTCTTCTT
CC_OL_005_N01	CC1G_03193												+										TGCTCTTGGGACTGCTGGATATCGTGTCTTACGGCATTGCTCGCACACTGGGAGTTATCGACGATGTAAA
CC_OL_005_N02																					0		ATATAGCCGGTAATGGCGATAGAAACCTGTCCAATCTTCTAAGCATTCATGACGGTGTGTGTCCTGATCG
CC_OL_005_N03	CC1G_00570															YIL096C		Putative protein of unknown function; associates with precursors of the 60S ribosomal subunit			0		CGCAAAGAACCCACCACCCCCTCAAATGAAAAGCGCAGCGCCGTATCCCAAATACACGATTTTACGATCA
CC_OL_005_N04	CC1G_00707		+		+											YHR050W	SMF2	Divalent metal ion transporter involved in manganese homeostasis; has broad specificity for di-valent and tri-valent metals; post-translationally regulated by levels of metal ions; member of the Nramp family of metal transport proteins			6		TTATGACCTCATCCGTGACATTGTTGGGCAAAGCGCAGCAACCCTCTTCGCTATCGCTCTTTTGGCTTCT
CC_OL_005_N05	CC1G_14869																						GTTTGTGATTCCTATGTCCGACCAGAAACACTCGTTCGAATCTGTGATGAATGTAACTTTGGTACATATG
CC_OL_005_N06	CC1G_02879												+		+	YLR024C	UBR2	Cytoplasmic ubiquitin-protein ligase (E3); required for ubiquitylation of Rpn4p; mediates formation of a Mub1p-Ubr2p-Rad6p complex			8		GGATGATTGGTTTGTACTACCTCATTAAGCGGGGGACCCTGTTGTACCTCAATGCCGGGAATGGAACGTT
CC_OL_005_N07	CC1G_04488																				3		GCCGAGCTTGAGACTATCTGGGCATACATATCGCACTTGATCTCTAACTATTATGGCCTAGGTGACCGAG
CC_OL_005_N08	CC1G_09998																				0		TGCACCCTCTGAAACTCCAGCTCCGGACTACAAATGCGAAACGCTCTACATCCAGAACCTGAACGAGAAA
CC_OL_005_N09	CC1G_02804																				0		TTCCTCTTACTGTTCGTCACCTCAGGACCTTCTACAGACCGTGTCACATGTTTCACCCGACGCCAAAATG
CC_OL_005_N10	CC1G_07358												+			YMR292W	GOT1	Evolutionarily conserved non-essential protein present in early Golgi cisternae that may be involved in ER-Golgi transport at a step after vesicle tethering to Golgi membranes, exhibits membrane topology similar to that of Sft2p			4		TCATTGGAAATATCCTTTCGTTGCCGTACATTCGAGGGTTTGTCGACCGCCTCGCTGGTTCACGCACGTC
CC_OL_005_N11	CC1G_00704																				0		TTTCAAACGCATCGAGGGGTTCACACCTGAGAAATACCAAGCCGCACATGAACAGGATCGGGAGTGGCTT
CC_OL_005_N12	CC1G_12779																				0		CCCCACCGCGCTTCTCCAAATGCTGCGATCGACCGTCCTTACAGCCTCTCAGGGCGTCATCACGACCTAT
CC_OL_005_N13	CC1G_09790																				0		GCTCAATACACGATTGGCAATGGAGAAAGGAGCAGTGCGGCGACGTCTTATCTTTCCCCGAAATACCTCA
CC_OL_005_N14	CC1G_07906																				0		TTCGAGTGCTCACTATCTTGCCACCCCTGGGATCCGTGCTCTCTCTTCCCGAGGTGCTCCTCCGAGGAGA
CC_OL_005_N15	CC1G_14285																						AACGACCACGCAATATGCAGGCCAAGGCTGGTGAAGGTGATCGCCATATCAGAACTAAAATGCCCAAGCA
CC_OL_005_N16	CC1G_09964																				0		GGCGGGAGGTATCCTGAAGCATGCACCTCGTCTAAAGAGATTGGGACTCATTACCCATACTATTGTACCC
CC_OL_005_N17																							GGAGACCCTCAAAATCCAAAACGATGAAACCCCAGCTAAGAGTCAATATCGAAACCCTCACAAACCGTAC
CC_OL_005_N18	CC1G_09225																				0		AGGTTATCTCGACCTTGAGCCAGAGGGCAACCATTATGACCCGAGTCGTCGATTCCTTGTATGTGACCAT
CC_OL_005_N19	CC1G_09071																				0		GAGAGATTTCCTCCTGCTATAACAAAGGATTTCATGGCGCGATACGGGCATTTGCCCAAAGAGCTCTTGC
CC_OL_005_N20	CC1G_13046																				0		TATGCCTACAACACCACGGACCACAAATGGTCCAACCAATACTTCAAGTCCGACGCCGAGTCGACTAGAG
CC_OL_005_N21	CC1G_08668														+	YOL138C		Putative protein of unknown function; may interact with ribosomes, based on co-purification experiments; null mutation suppresses cdc13-1 temperature sensitivity			0		AATCTGCAAACACGGAGGGCACCAATCCTGCTACCGCAAGTTCTACCTCCAACATGCAATGGTCGAACTA
CC_OL_005_N22	CC1G_07305																				0		CTCACCGTTTGTTCAGTACGGCCATATCTCCGAGCTTTCGCTCAATGCTATCAGTATTGTCCCCTTCGAC
CC_OL_005_N23	CC1G_01811																						CGGTGTTTCCACGGGTTCTTCTACGATATCTTTTGCGTCCTCAACCTCATCAAGGGACCTATACCCCAAC
CC_OL_005_N24	CC1G_04656																				0		GCAGTATCGCTCCTGTCTATTTCATCCCCTCTTTCTTTGTGAATCCGGCGAGGTACCATGGGATTAAGGC
CC_OL_005_O01	CC1G_11177												+										TTCCCCGTACACAAGGCGTACTGGCGAAGAGCTTGATGCCTACTCGATGCACTCCCGTCGCGACGTCGTC
CC_OL_005_O02	CC1G_03664																				8		TGAAGAGCCGCCTGTGCCCCGGACGGATTCTAGGTCGGAAATTGTTCGTTTGGCCTATGATGAAACGGAC
CC_OL_005_O03	CC1G_04672																						CGTTCTCGAGGGAATTCGAGCTGCGGAGTTCCTGTCGCTTTTGAAGGTCATGTATCCCCAAAACTTTGGA
CC_OL_005_O04	CC1G_05233		+																		5		CACCCAAAGGTCTGAAGAAAGCTCTGGGACTCTTGGCTAAACGAGACAACTCGGATTCGTATGATCGCTC
CC_OL_005_O05	CC1G_09620																						GAGGAGAGTCAGTGTGTTGATTAAGAGTCCGGTGCATTTTGGGGTTATACCACCCGATGTGTGGAACCAG
CC_OL_005_O06	CC1G_08592																				9		GCTCGCGCTGATGTGACCGACCAAATGGAAATGTGGAGGAAACTCGAAAAGATTTACGAAGTCGAGGGTA
CC_OL_005_O07	CC1G_02309																				5		AGAGGCTATTTTGCGGGAGGAGTTCAACGAGATGGTGAACGAGAAATTGAAGGCGGCAAATGTGGACGTG
CC_OL_005_O08	CC1G_08552																						ATGGTAGGGAGGGACGACCAACACTTCCTGCCTACGAGAACGCGACATTTCAAACGGCACATGCTGTTAA
CC_OL_005_O09	CC1G_06274																						AGATTGATTCTCCCGCTGTAACGAAGAACAAGGACGGAATTTACCAGTGCAAGAAGCACGGATCGGCCGA
CC_OL_005_O10	CC1G_07110																				0		AGCACGCCCATGCACCCACAAATCTTCTCAGGGGCCCCCAAAGACAAAGACGGAGTGATATCCCCCTTCT
CC_OL_005_O11	CC1G_03173																				0		ACACACACCCAGTACGACTTCCACTCCTCTTCGTCGAGATTGTATGGGATACCAGACCTTTCAATGCGCC
CC_OL_005_O12	CC1G_14241																				0		GGCTGTCGATTATTGAGCTGGGGCTGGGGAGGTATCCTTACCCTCCGGAAACTTACTCAAATGTCTTTGC
CC_OL_005_O13	CC1G_10809										+										4		TTCAAGACCATTACTTTGAGCTATGAAGGCAAGACTGCCCAGGCTGTCATCATGGACATGGTATGCGGCT
CC_OL_005_O14	CC1G_08971		+				+		+		+												AAACCCAACCGGGCATTTTCGGCGGCTTCGTCTGTATTTGGAGCGTTATACGCCAGTTTCGCTGCACTCT
CC_OL_005_O15	CC1G_09668																				0		GTACCGTCGTTGGTCCTGGCCTCAGTGCAGCGGTCAAGCTCGCTGTTCGGGACTCTGTCGAGTTCGAGGG
CC_OL_005_O16	CC1G_07727															YDR381W	YRA1	Nuclear protein that binds to RNA and to Mex67p, required for export of poly(A)+ mRNA from the nucleus; member of the REF (RNA and export factor binding proteins) family; another family member, Yra2p, can substitute for Yra1p function			0		CCACTCCGAGATGTCACCCTCCACTACGACGCAAACGGCAAATCGAAAGGTGTCGCCGCGGTCCACTTCT
CC_OL_005_O17	CC1G_10197																				0		AGAGAAGGAGCCCGAAAGCAGATGGGCTTTGGCACGAATGAGCCTAGGGCTACTATGACCTGGGAGTGGA
CC_OL_005_O18	CC1G_06660		+																		0		AAGGACCTTTTGGATGGTCACCCGGATACGTTTTTTGCGATGGACGGTTCGAGGGGGTTTCAATGCGAGT
CC_OL_005_O19	CC1G_03771																				0		CCTAGAAGGAATCCTTGGAACAGTTTTGGTTGAAGGGGGCAAACAATTGGACCGACACGAGCGAGCAGTT
CC_OL_005_O20	CC1G_10054																				0		CCAGGAGGAATACGTGAATCGCGTAGATAGGATGTGCTGGAACCAAAGGCATTCGGAAAAGGTTGCATTG
CC_OL_005_O21	CC1G_14635															YMR053C	STB2	Protein that interacts with Sin3p in a two-hybrid assay and is part of a large protein complex with Sin3p and Stb1p			7		AAGATTATGAAATCAACATGCCTACGCTGTCCACGGTCGAAGCTCGCACCAAAGTTCTCGCTGCCCTTGA
CC_OL_005_O22	CC1G_05449																				3		CAAGGCTGGTTTGACAGGAGAACACGAGAGGTATCCAGAGGCAATGATGAAGGCTCTGTTCGTCGATACT
CC_OL_005_O23	CC1G_11467																				0		CCGAAACCATCGCCACCTTGGAGGAACGTCTCGGGGTCCCAGCTGAGCATAGAGTTACAACTACCACCAG
CC_OL_005_O24	CC1G_10470																				3		ATATCAGGAAATACAACGATGTGGCCGCCGTTCGTCAACACAACGCTCGACTACGAGATGCCGTTCACGA
CC_OL_005_P01	CC1G_00702														+	YDR262W		Putative protein of unknown function; green fluorescent protein (GFP)-fusion protein localizes to the vacuole and is induced in response to the DNA-damaging agent MMS; gene expression increases in response to Zymoliase treatment			0		CTTGGCCGACCTGCTCACCATTGAGAACAAGGCTTCGATATTCTACGCCTATGCGAGGGAATTGGAGTTG
CC_OL_005_P02	CC1G_13074																				0		ATTCCCCGGCTTCCCTCCTGGCGACGGAGGAGGATTCCCCGGCTTCCCCCCAGGTGACGGCGGAGGCTTC
CC_OL_005_P03	CC1G_02775																				0		TTAAAAAGCGAGATGCATACAAGACTCGCACCCGCGTCAGCTACATTGGCCTCGACTCCGAAATGTCCAA
CC_OL_005_P04	CC1G_10650				+																2		TCGTTCACAACGAGATCTGGATTGAGCATTTGGGGTGGAGGTATAACCAGCTTGGAGACCGGTTCGAGAT
CC_OL_005_P05																YJL207C	LAA1	AP-1 accessory protein; colocalizes with clathrin to the late-Golgi apparatus; involved in TGN-endosome transport; physically interacts with AP-1; similar to the mammalian p200; may interact with ribosomes; YJL207C is a non-essential gene			0		GAGGATCTTGGCAGTGACGTCTTTGTCCACGACGACGAGTATCGCTTTGGGGAGGCGAAGAGGAGTAGAA
CC_OL_005_P06	CC1G_15694																						TAATGGTGCTTTGGTTCACTGGGTGTATCCATACGAGAAGCTGCGTGCTGCCAACGTTATTTCGACGCTG
CC_OL_005_P07	CC1G_08657																				0		TTCTCTACATAAGCGCCGGGATGTCGAAGAGTTGAAACGGCTGGTGGGACAAGTGGAAGAGTTGGTCAAT
CC_OL_005_P08	CC1G_12456																				0		GTCGGGGAAGAAGGGGAAATACAGCTTGGAGAATGCATTACACATGCGAACACACGCAGCGAATGATGCT
CC_OL_005_P09	CC1G_12794																				0		ATGAAGAAGGGGACTTACCGTTGCCTATCGCTGATGCTCCATCTCGGCGTTCACTTGCACAGATTCAGAA
CC_OL_005_P10	CC1G_04392															YJL024C	APS3	Small subunit of the clathrin-associated adaptor complex AP-3, which is involved in vacuolar protein sorting; related to the sigma subunit of the mammalian clathrin AP-3 complex; suppressor of loss of casein kinase 1 function			0		CCTCGACACCAACATCGAGGAAATAGACCGATCGGTACAACAAGCGACACGAGCACGCAAAGAATCCTTT
CC_OL_005_P11	CC1G_01566																				0		CGGAGAACGATATCTTCAACATCTACGCGCAGACAAGTCCCACTTGGCAATACATGTCCCATGGTTGTGG
CC_OL_005_P12																							ACCTCAGGCTGTGTCCCTACGACACCGTTCTCGACTCTCGATTCGAGGTTCCCCAGACCAGATTACGAGC
CC_OL_005_P13	CC1G_06185																				8		AATCGTTGAAGGCGTTCGTCAAGGATAACCCGGATGTCGAGGGGTCCCCGGAGGAGGATAAGCAGTTCTT
CC_OL_005_P14	CC1G_04506																						GCCAAACTATGTCTACCAACCTCTTCGAACGCCTCCTATTACCCACAGACGAGAACCGAACTATGCGTCT
CC_OL_005_P15	CC1G_12088																						GAAGGTGGCTGGTGCGAGATTAGAGGGGAAGAGGATAGAGGCTTGGGTTGATAGCTCAAGGATGCATTAG
CC_OL_005_P16	CC1G_00427															YDR313C	PIB1	RING-type ubiquitin ligase of the endosomal and vacuolar membranes, binds phosphatidylinositol(3)-phosphate; contains a FYVE finger domain					CCAGCTGAAAGCACACTTCTAGGGGTGGAGTGTGTGATCTGCTTGGAAGAATTCGTTAAAGGTTCCACGG
CC_OL_005_P17	CC1G_08644															YHR001W	OSH7	Member of an oxysterol-binding protein family with seven members in S. cerevisiae; family members have overlapping, redundant functions in sterol metabolism and collectively perform a function essential for viability			0		AGCAAGCACCCAACGAGAGTAGACGGTTATGGTCTGATTTGACGCAGGCGATTATCGCGAAGGATATGGA
CC_OL_005_P18	CC1G_11450		+		+																		AGTTCCAGTGACAAGAACGAAGGCAACGTCATCGGGGGATACAAAGCCACTCTGAAGAATCCTCGAGTCT
CC_OL_005_P19	CC1G_08834																				0		CGGAAACGCAAGACCCATGCCCGTATCGATTCTGTGGAAGATGAATATTGTCGGCCTGAACATCAGGATG
CC_OL_005_P20																					0		TCAAGCTTCCCTGACTGACTTTGAATCCTTTGTGGCAAAATTTCGCCCGTTCTCAAATGGCATTCCCTGC
CC_OL_005_P21	CC1G_06263																				0		TAGATGGCACCATTCCCTCAGGCCAAATTGAACGAAAACCCGCTCTGGGACCTAGTTTCACGTTCATGAC
CC_OL_005_P22	CC1G_05543																				0		CGTTCAGGTCGACGAACAGTTGGAAAAAGAGATCGTGGCGGAATACGTGGAGGGTCGCATATTGCATCTA
CC_OL_005_P23	CC1G_15590																						TTTACGAGCTCATCCACGCTCGGGACCATGAGACACTGAAAGAACAGTGTACACTGCCTGTTCTGGACAT
CC_OL_005_P24	CC1G_01300																				0		AATCCATTTGTGCCTTTATGCTTGTGCTCCAGATGTTTCTCAAGATCCGAGCTGCCCACCACGGTAAGCC
CC_OL_006_A01	CC1G_06821															YOL011W	PLB3	Phospholipase B (lysophospholipase) involved in phospholipid metabolism; hydrolyzes phosphatidylinositol and phosphatidylserine and displays transacylase activity in vitro			0		TCCAGAGGTACTGTTATGACCCACAGAACCCGCCTAGCAAATCCCAGCTACCGAATCGCAAGTTGGAATT
CC_OL_006_A02	CC1G_04456																						AGGGAACGCAGGGATGTCTCCGATCCCATCATGCCACTTGCAGGACCTGTTTTGTTAAACCCGATTTTGT
CC_OL_006_A03	CC1G_10306															YJL166W	QCR8	Subunit 8 of ubiquinol cytochrome-c reductase complex, which is a component of the mitochondrial inner membrane electron transport chain; oriented facing the intermembrane space; expression is regulated by Abf1p and Cpf1p					TTACCACCTACACCATCTCGCCATACCAGACCAAGACCGCTCCCCACTGGGCACGAAACTACCTCTTCAA
CC_OL_006_A04	CC1G_04918																				0		CAAACCATGTTGAGACCCACCCAATTATCGATGGTACCCCCTGTGATTCCGAGGGCTACGACTACGACAG
CC_OL_006_A05																							TCACCTGAGCGATTCGAACACTCGCGGTCAAAGACCAACCGCTTTGCCTGGCCCGAAGGCCAATAGCAGG
CC_OL_006_A06	blank																						0
CC_OL_006_A07																							TCGATTTCGACATAGACACTGTGGATAAGGCGGAGGCGGAGGAGCAGGACTAGGAGGATACGGACGAATT
CC_OL_006_A08	CC1G_04161																						CGCAGTATGGAAACCAACCGCAGTATGGAAGTCAGCCGCCGCCCCCAGGCCAAGGCGTCAACCACGTCGG
CC_OL_006_A09																					0		AAAGCTTCGTGCATTGGGTGCAGGTTGACGGGGAAAAGGGAGGCAATGTTCCAGAGCCAATCGGCGTTGT
CC_OL_006_A10	CC1G_03525																				0		GTGTCTTGTTCGACATGTACCGCCCTCAGAGCACCTACATCATCCCCGGTCCCCGCCCCTACGGCACCTC
CC_OL_006_A11	CC1G_01527																				0		AGCGAGAAAGACAGCCACTTGACCAGCATGCCCACTTTTAGGAAGAAATACACGTCCAGCTTCTGGAGCC
CC_OL_006_A12	CC1G_02173																				0	CoH7	ATCATCTGCAGCCCCATTACTATTATCGGTCTCCCCGGAAACTCCTGACGGCATTGTCGCCATCGGGTGC
CC_OL_006_A13																							TTCTGTTTCGTGTTCAACGCTGTGAGCCTCTCCCGCAACTCTGATCCTCGATTCCTGATCGCCACGCTTG
CC_OL_006_A14	CC1G_00466	+																			1		TTGGAGAAGACCGGTGCTCTCCCCAAAGACCAGAACCCTATTCGCAAAGCTATTCAGGAAGGCAAGTTGC
CC_OL_006_A15	CC1G_06280															YKL022C	CDC16	Subunit of the anaphase-promoting complex/cyclosome (APC/C), which is a ubiquitin-protein ligase required for degradation of anaphase inhibitors, including mitotic cyclins, during the metaphase/anaphase transition; required for sporulation			0		ATTCTCAGAAGCGCAGGAACAAGAGTTTATGGCGGGACTGGCCGAGATCAAGCAGAAATGGGCAAGGTTA
CC_OL_006_A16	CC1G_04432															YBL049W	MOH1	Protein of unknown function, has homology to kinase Snf7p; not required for growth on nonfermentable carbon sources; essential for viability in stationary phase			7		GCGTCAAATGCGGGGTTACTCTGGGTTGGAAATACGAACTTGCCCAGGAGCCTTCACAGAAGTATAAGGA
CC_OL_006_A17																							GGATCACCTCCGGCTTCGATCCTTGGCGACTCATTCAATCTAAACCTTCTGAACCTTACGTTTACCGAAA
CC_OL_006_A18	CC1G_06093																				0		CAAGAATGAGCAGGGTCTTGGAGTGGACAATGCTCAGAGGGTCGGAAGGGTAGTTCGAGAATTCCCATAA
CC_OL_006_A19	CC1G_07614																				9		CCCGGCTCCCAAGCAATATGTTACTTCGAAACCTGCTCCTCCACCTCGAACTATGGCATCTTCATCATCT
CC_OL_006_A20	CC1G_15040															YDR527W	RBA50	Protein involved in transcription; interacts with RNA polymerase II subunits Rpb2p, Rpb3, and Rpb11p; has similarity to human RPAP1			0		TCTCTAAGGGAGAAGAGACGGAAGAGGCGACGGTATTCGCACATGGCTGCACAAACTGTGACACCGATGA
CC_OL_006_A21	CC1G_04058		+																		8		AGAATGGGGGTATTCAAGACGTTACCTATACGCTCCCCAACAAGCACTACATCCCAGTGGACATGCGCTA
CC_OL_006_A22																							CTGGTCAGCGAAAACCAAACCGGCGATTGAGAAAGCCGTCCACCTTGATTTCCGATTCGAACACTGGTAA
CC_OL_006_A23	CC1G_11620	+																			0		AGGGCGGAGAAGTTCGCTCGTTCTGCGGAAAAAGGGCATAAGCGTGAATACAAGCGGGTCAAGAGGGATG
CC_OL_006_A24	CC1G_01344																				0		TACATCGTCTTGAACCGGAATGGCTCAGCGAACGAGCTGGAAATATCCTCCCGCAACTTCAACCCCATCA
CC_OL_006_B01	CC1G_03107																				0		GGCTTGGAACGAGAAGGAGAAGTTCTTTGGGCAGAGCTACGAAGAGACTGATATTGTCGATGCTGCGGTT
CC_OL_006_B02																					0		GGCGATCCCTTACATGGGTCTTCTAACGAGGCGGTACAGGAATAACTTCGAGCTTTATGACGGCACCGCG
CC_OL_006_B03	CC1G_02133																				3	phb2.3_B43	GACATCCCACAACCCATTCCGGGCCAAGATCAACAACCACCTATCAACGAGGAGAGACCAGGTGCTGGAA
CC_OL_006_B04	CC1G_07823																				0		CTGTTCACAACCACTCGGTTCACGGGGATTTCCAGTGTTTCGCTTTCGCTGTATGATCAAGGGAACACGA
CC_OL_006_B05																					0		GTTTGGGCGCCGCCCATTGTCGGTGCCTACCGATCATGAAATGGAAGAATCTATGATTCATGGCGACGAG
CC_OL_006_B06	CC1G_07864																				3		CCTCGTACTACAACGCCAACATCGACGGCAAGACGCACACTGACGTAGCATGGTACTACCCCAAGACCAT
CC_OL_006_B07	CC1G_07142																				0		TTGGGATATTATCAAGGGTGAAGCGAAGGTAGCAGTTGGCGCGTCGTGGAGCCCCCATTTCTGCATTCAC
CC_OL_006_B08	CC1G_11225																				0		CGTCCTTCTGCTTATCGCAGTGATTTGTGCCCTCACTCTATCCCTTTCTCGCCTCTACCAGTTCAACTGA
CC_OL_006_B09	CC1G_13831															YOL115W	PAP2	Catalytic subunit of TRAMP, a nuclear poly (A) polymerase complex involved in RNA quality control; catalyzes polyadenylation of unmodified tRNAs, and snoRNA and rRNA precursors; has 5'-dRP lyase activity; disputed role as a DNA polymerase			0		GGTCGTATGGTTTTCAAAAAGTTCGGACGGCATTGGCGGGAGCGCATAGTATTCTGACTGCTACTGCGTA
CC_OL_006_B10	CC1G_06939															YHR168W	MTG2	Putative GTPase, member of the Obg family; peripheral protein of the mitochondrial inner membrane that associates with the large ribosomal subunit; required for mitochondrial translation, possibly via a role in ribosome assembly			0		TCAAAATCTAGACAAAATCGTTGCACTCATGAAGCAGTATGTTATGGACGCCCGGGAGCAGCAGCCATAA
CC_OL_006_B11	CC1G_08872																				0		CACAAGCGCGTTGGAATTTTTTGGTCTATTACCCTCCCTCCACACGATTTCTGTCGACAGACAAAGCAGT
CC_OL_006_B12	CC1G_09977																				0		GGTCGATGACGATTTGGGGTGCGATGATTTCCCGAGCTGGTTCAGACCCTTCACTATGAGCGGTATTAAT
CC_OL_006_B13	CC1G_14614	+														YML092C	PRE8	Alpha 2 subunit of the 20S proteasome					GGTGTACGCCCTTACGGTGTTTCATTGTTAGTGGCAGGATGGGATAGTCATCGAGGGCCAACATTGTATC
CC_OL_006_B14	CC1G_04975															YIL007C	NAS2	Protein with similarity to the p27 subunit of mammalian proteasome modulator; not essential; interacts with Rpn4p			5		CGAGAGTGCGGATCATCGAGCTCCGGAATGATTTCAAAGCTGTTATGGAGGAGATGTCGAAGGTTTTGGA
CC_OL_006_B15	CC1G_01971																						TACACGTTCCTTGGAACTGCCCTAGGCGCAACAATGTGGTTCTTCATCTTCTACCGAGCCCGACAAGACG
CC_OL_006_B16	CC1G_09550															YLR191W	PEX13	Integral peroxisomal membrane required for the translocation of peroxisomal matrix proteins, interacts with the PTS1 signal recognition factor Pex5p and the PTS2 signal recognition factor Pex7p, forms a complex with Pex14p and Pex17p			7		AAGGGTGGTTCCCCAGGAAATGGGTCGAAATCCTTGAGCGAAGACAACCTGCCGATGCTCCTAAAGCATG
CC_OL_006_B17	CC1G_09858	+														YJL033W	HCA4	Putative nucleolar DEAD box RNA helicase; high-copy number suppression of a U14 snoRNA processing mutant suggests an involvement in 18S rRNA synthesis			3		AAGGCGACTCTTCCAAATACCGCCAACCGTAATGGAGTCCGAACGAAGTACGACAGAATGTTCCAACGCA
CC_OL_006_B18	CC1G_14250																				0		GGAAGACGGCTGCCCCTGGAGAGCTGCGAACCATAACCAAAGGCGAGGTGGGCTTCCTTTTCCTACTTTA
CC_OL_006_B19	CC1G_14245																						TGACACGATGGACTCCACAGCAAGCGCGACTCCACCCATTCATCACCGGAGAAAAGTTTACAAAACCCTT
CC_OL_006_B20	CC1G_15851															YGL022W	STT3	Subunit of the oligosaccharyltransferase complex of the ER lumen, which catalyzes asparagine-linked glycosylation of newly synthesized proteins; forms a subcomplex with Ost3p and Ost4p and is directly involved in catalysis			0		CACGCCAAGGGGTGAATATAGGATTGACGAACATGCCTCGAGGACGATGAGGGAGAGTTTGATGTACAAG
CC_OL_006_B21																							CGAATTGATTGACAAAGGGGTAGATCACAGTGCCGGTAATGGGTTCTGCTATCTGGATGAGGGTGATGAC
CC_OL_006_B22	CC1G_12430																				0		TTGGCCACAAATCTCTTACTCCTCCACAGAACTTTCACGGTCCCTCGCCGCTATCGATTCCCTGGGAGAA
CC_OL_006_B23	CC1G_07636	+																					CGTCCATTCGATATCACCATCCCACCGTCCTCCTATTCCGGAGATGCCAATGATGCAGCTGAAAACACCA
CC_OL_006_B24	CC1G_11065															YDR434W	GPI17	Transmembrane protein subunit of the glycosylphosphatidylinositol transamidase complex that adds GPIs to newly synthesized proteins; human PIG-Sp homolog			0		CCTTGGCGTTTGAAGTACAATCCCTGCCCGACAGCGAACACGGTCTTTCCTATGAAGATCTCACCGTCTT
CC_OL_006_C01																					0		TGATGCTGTTAAGGCCCGGAATGAGGTCAGGCGCTTTTACCATCCCAATGTATGGCATGCGTGCAAATTG
CC_OL_006_C02	CC1G_00784																				0		CTGGTGTCGTGAACGCCGTTGCTGGATCCTCCTCACTGGGGACCAAGCGAGCTCGTAACGGAGATGGCTT
CC_OL_006_C03	CC1G_07550																				0		CATTGGGAACGCTTTCCGAGGTATCCCAAAATCCTCAGTTCTTCTGCGACTCCATGGAGGCTCTTTATGG
CC_OL_006_C04	CC1G_10356																				0		ATCGAGCATGGCGCGAAGAGGTTCCTGATGATCAGCGGCAGCGGGGCAGATAAAGAGAACAACATTGGAG
CC_OL_006_C05	CC1G_03626															YOL147C	PEX11	Peroxisomal membrane protein required for peroxisome proliferation and medium-chain fatty acid oxidation, most abundant protein in the peroxisomal membrane, regulated by Adr1p and Pip2p-Oaf1p, promoter contains ORE and UAS1-like elements					GGGCCAACACAATCAAATTCATTAACCTTGCCCCTGAGACTGCTAAACGTATCGCAAAGACCTCGTTCCG
CC_OL_006_C06	CC1G_06169																				4		AGGAGAATTACATGAACGGTTTCCGATGTGATGTTACTGGCGCAGAGGCGAATGTAAACGTCAAGGTCGC
CC_OL_006_C07	CC1G_15732																				0		CAGCTCACAGTGATACATCAGAGAAGGAGAAGAGTGGACGTGATGAACCGACCACGCTCTTGCAGCAATT
CC_OL_006_C08	CC1G_06468																				0		GACGTTCTCAAAGCCGACGTGATTGTTGGAGCAGATGGATACGACAGTGTCATAAGAGCCGCTATATCGG
CC_OL_006_C09	CC1G_03292																				0		TTTCATCGGCACAGTCGCCTACCATTCGCTCCTTGCCCTCCTTACACGGTCAAAACCTATACGCTCGACG
CC_OL_006_C10	CC1G_06976																				0		AGATATGCAAGGCACCATCCAACAACTAAAGGAACGATGGCAGGATTCACGCGAGGCACTATTGTCCAGG
CC_OL_006_C11	CC1G_12917																						GGAGCATTCCCAACACTATTTCCCTATGGACGAGGGGGATTTGAAACCAACCGGCCTCAAGACGTATCAT
CC_OL_006_C12	CC1G_04545																				0		AGATGCGCATTTACTATCAACGCTCAATGTACGAACGAGCCTGGGTTGAACGCCAGACCGAAAGGACTAG
CC_OL_006_C13	CC1G_02832																						GCTTCAGTACAGGCTGACTGATAATGGGCCGGTCTACTTTGATAAAGGGACGAGTGAGGGGGTTTTGTAG
CC_OL_006_C14	CC1G_00609																				0		ACAAGGAGTACTCGACTTTGCGCGCCTTGAACCAGCATCTTGGAAGCCCCCGACATCAGAGCAAGATTTA
CC_OL_006_C15	CC1G_05807																				0		AAATAGACCGCATATCTGACCGATTGGAAACACTCCCCACCGAGAACACCGTGACCAATTTCCCTCTGCA
CC_OL_006_C16	CC1G_00297															YJL002C	OST1	Alpha subunit of the oligosaccharyltransferase complex of the ER lumen, which catalyzes asparagine-linked glycosylation of newly synthesized proteins			2		AACTGAGACCACGTTATCCTCTTCTCGGTGGATGGAATTATAGCTTCACTCTTGGTTGGGACGCACCGCT
CC_OL_006_C17	CC1G_07127												+								0		CCAACACACGACGAAGGCTTCCTCTGCATGCTTCATGCCGGAAAAGTCGAGAGCAGGAGATACGCAGAAT
CC_OL_006_C18	CC1G_12987																				0		TTCCTCGTGTTCTATTACCCTCATGGCGAATTTAAACCCGACGATCTCGACCACATGCTCCTACGCTCCC
CC_OL_006_C19	CC1G_06733								+												0		CTAGCGTCTTCGATGCCCCTCATTTGCAGAACGCTTCAGCTTGGATTGGCGTCTTTGGATTTATGATTGG
CC_OL_006_C20	CC1G_02825												+										GGCGACGGGGTGCCCGATAGGCCGCGACAGTTGCCCTGAAGATCCTGGTTTGGACCCAATCCACAACTAC
CC_OL_006_C21	CC1G_10053																				0		ACGCCAATCTATTTCACGCCTCGGATGATGGGATGGCCTCAAGGTGACGAGGACATTTCCTTCTTGCAGA
CC_OL_006_C22	CC1G_12292															YCR002C	CDC10	Component of the septin ring of the mother-bud neck that is required for cytokinesis; septins recruit proteins to the neck and can act as a barrier to diffusion at the membrane, and they comprise the 10nm filaments seen with EM			7		GACCCATCGATGTTATTGTGATGAAGAAGCTCAGCGAGGTCGTCAATGTTGTTCCTGTCATTGCCAAGGC
CC_OL_006_C23	CC1G_04404																				0		TCAACTTGCCCATTTGTTTCCTGGCGTCGGTCATAATGGCTTTGGCACTGCACAAGGTCCGATTCACACA
CC_OL_006_C24	CC1G_02778																				0		CGAACGATTCTGGGAGAGCGTAGGGCAGTGTTTTCCAAACGTAACGGAGATTGAGATGTACCTCAAGCTC
CC_OL_006_D01																YGR100W	MDR1	Cytoplasmic GTPase-activating protein for Ypt/Rab transport GTPases Ypt6p, Ypt31p and Sec4p; involved in recycling of internalized proteins and regulation of Golgi secretory function					TTGGAGGCCCACGATTCTGGGCTATCTGAAGCTGACAAGAAACTCGCCAATGATCTATTGAATGCCGAGC
CC_OL_006_D02	CC1G_07851																						GATTTGGTGTTACCGTGGTGGAAATACGATACCGAAATGGATCGAACGACAGGCCGAGGACTTCTCGACG
CC_OL_006_D03	CC1G_09386																				0		GGTTCAAGATGCACGAATGACAAGACGTCAGCAAGAGACTACCTTGGGAAAGATTCTATGGCACCAGGTG
CC_OL_006_D04	CC1G_01925																				0		CGCTATTAAGAGCAAAGCCTATCGAATGAAGAAGGCGGACGAAAAGGGTGGGCCTGGGTGGGTGGAAATA
CC_OL_006_D05	CC1G_14703															YBL080C	PET112	Protein required for mitochondrial translation; mutation is functionally complemented by a Bacillus subtilis ortholog			2		AACAGCGAACTCCAGCAACTGGTAGAGAAGGCGATCACTGCACTCCCCAAAGAAATCGAGGCATTCAAAG
[truncated: 11,443 more rows]
