# Supplementary material for: Global Gene Expression in Coprinopsis cinerea Meiotic Mutants Reflects Checkpoint Arrest
Source: Oxford University Press journal article supplement (doi:10.1534/g3.112.003046), 2012-10-01
Supplement: 1213_tables3.xlsx [file 1213_tables3.xlsx]

## Sheet: Sheet1
Supplemental Table 3 Expression ratios and FDRs for rad50-1 vs. wild type comparison
For each probe, the log2 of the rad50-1/wild type expression ratio at each time point is given. This is the median ratio of the replicates and is only given if data were available from at least two replicates at that time point. All false discovery rates (FDRs) less than 50% are also listed for individual time points and the time-course analysis (genes with FDRs less than 5% were considered signi…
	K		K+3		K+6		K+9		K+12		time course
ID	log2(ratio)	FDR	log2(ratio)	FDR	log2(ratio)	FDR	log2(ratio)	FDR	log2(ratio)	FDR	FDR	cluster
CC_OL_001_H05	-0.0305255		-0.209434		-0.0744719		0.0280076	29.421	0.133164	20.224		1			`
CC_OL_001_N24	0.105933		0.278271		-0.0691578	31.928	-0.0598953	29.421	-0.223115	26.944		1
CC_OL_002_D17	0.170922		0.0593361		0.082363	38.1234	0.0427689	22.6047	0.0715844	22.8514		1
CC_OL_002_E10	-0.217505		0.0290019		-0.332966		0.102172	40.8976	0.423641	6.35742	17.2576	1
CC_OL_002_G10	-0.155195		-0.118346		-0.031144		-0.129995	32.6536	0.380786	9.03094	34.6406	1
CC_OL_002_J04	-0.22341		-0.716285	38.9184	-0.389955	15.759	-0.255971	46.0931	0.0497605	26.944	40.1778	1
CC_OL_002_K09	0.00805458		-0.0956042		-0.188749		-0.0835385	46.0931	0.203071	9.03094	41.5181	1
CC_OL_002_O22	-0.0839442		-0.353504	38.9184	0.0757165		-0.38398	6.05121	0.168879	9.03094	45.3265	1
CC_OL_003_C01	0.313555	22.8534	-0.202522		-0.133454		0.272598	16.9281	-0.0371722	20.224		1
CC_OL_003_H13	0.0433333		-0.0711502		0.00565152	38.1234	-0.130557	46.7771	0.0171813	36.305		1
CC_OL_003_M03	0.809749	25.6173	0.196401		0.26909	31.928	0.392995	0.826129	0.234659	20.224	41.5181	1
CC_OL_003_M14	0.374201	41.8869	0.280329		0.411195	14.2796			-0.0869637	27.4543		1
CC_OL_003_N22	-0.410237	5.90913	-0.2207	38.9184	-0.279475	46.6521	-0.351118	16.9281	0.380517	4.15931	18.9075	1
CC_OL_003_P15	0.0993218		-0.176481		0.00290938	46.6521	-0.291915	3.66522	0.542491	20.224		1
CC_OL_004_E01	0.0948694		-0.202272		0.0353937	46.6521	-0.0600781	47.8871	0.186512	22.8514	43.6613	1
CC_OL_004_G07	0.185745		0.395728		-0.0908427	43.057	-0.124378	32.6536	0.428422	5.47181	49.6822	1
CC_OL_004_G11	0.40244	49.1692	0.0872036		0.0955275	31.928	0.00523532	22.6047	0.280533	5.47181		1
CC_OL_004_H01	0.133158		0.240865		0.160882	31.928	-0.0183736	29.421	0.208741	25.5212		1
CC_OL_004_H06	0.0398063		-0.0430655		-0.0665804		-0.106108	29.421	-0.0423972	36.305		1
CC_OL_004_K20	0.0168244		0.186343		0.150036	31.928	-0.189862	40.8976	0.0793298	20.224		1
CC_OL_005_H21	-0.111478		0.110654		0.00192369		0.10185		0.29034	9.03094		1
CC_OL_005_L21	-0.241709		-0.0276603	38.9184	-0.0815662		-0.130013		0.187118	20.224	47.8336	1
CC_OL_006_A14	-0.074443		0.1914		0.128928	31.928	-0.00582466	29.421	0.26149	20.224		1
CC_OL_007_H13	-0.0165386		-0.2675		-0.175773		-0.196144	4.8009	0.167529	20.224		1
CC_OL_007_K08	0.0629851		0.192337		0.0876615		0.315344	9.83518	0.122069	20.224		1
CC_OL_008_E10	-0.429635		-0.932363	18.7392	0.0514052	43.057	-0.203306	7.50597	-0.0534363	26.944	41.5181	1
CC_OL_008_E15	0.0117572		-0.193443		-0.128001		0.0562484	29.421	-0.0630204	32.346		1
CC_OL_008_F09	0.350484	22.8534	-0.07635		0.145779	31.928	0.0449122	42.9187	0.204437	20.224		1
CC_OL_008_O19	-0.47145	9.29258	0.0438835		0.511759	15.759	0.0324104	29.421	0.120537	20.224	14.3112	1
CC_OL_009_B09	0.0811045		-0.0320614		0.127493	46.6521	0.00189437	49.3629	0.0546698	22.8514		1
CC_OL_009_E10	-0.00661199		-0.146427		0.286827	31.928	0.0207466	40.8976	-0.00477611	26.944		1
CC_OL_009_F07	0.458909	21.354	0.109553		0.142879	31.928	-0.360888	1.90836	0.405141	3.5488		1
CC_OL_009_K03	0.0306581		0.152594		0.158607	31.928	0.118073	16.9281	0.222088	9.03094	45.3265	1
CC_OL_010_H21			0.103206		-0.0232721		0.286547	4.8009	0.359812	6.35742	43.6613	1
CC_OL_010_H22	0.271254		0.0754641		0.0286487		-0.0724657		0.235684	9.03094		1
CC_OL_010_I07	0.175161		0.124496		0.177059	38.1234	0.147825	9.83518	0.0357581	20.224		1
CC_OL_011_D09	-0.2276		0.037406		0.014097	38.1234	0.0868008	16.9281	-0.0772522	29.2273		1
CC_OL_011_F08	-0.0400335		0.16861		0.0635451	38.1234	-0.0638758		0.103196	20.224		1
CC_OL_011_F20	-0.0441861		-0.0384031		-0.347241		-0.348533	3.20256	-0.0571539	36.305		1
CC_OL_011_F21	0.322364				-0.255996		-0.335669	40.8976	0.28516	26.944		1
CC_OL_011_I10	-0.0290976		0.0834692		0.0821601		-0.134054	22.6047	0.175289	25.5212		1
CC_OL_011_I16	0.427732		-0.214057		0.236987	15.759			0.118022	36.1645		1
CC_OL_011_N04	0.204111	49.1692	0.0878177		0.221891	31.928	0.236187	13.6888	0.250124	9.03094	45.3265	1
CC_OL_012_A17	0.384159		-0.00471658		-0.0340681		0.295994	16.9281	0.226625	9.03094	47.8336	1
CC_OL_012_H21	0.014394		-0.211038		-0.1281		-0.110189	46.0931	0.47319	6.35742	15.748	1
CC_OL_012_M14	-0.293555		-0.0945181		-0.210918		-0.00266886	29.421	-0.310577	29.2273		1
CC_OL_012_N11	0.147223		0.152219		-0.0115598	46.6521	-0.140359	32.6536				1
CC_OL_012_N15	-0.0392306		0.0874848		-0.0455059		0.0457276	29.421	0.362657	26.944		1
CC_OL_013_G10	-0.0551792		-0.216646		0.042792		-0.291201	29.421	0.228963	20.224		1
CC_OL_013_J17	0.0446191		0.149241		-0.0471204		-0.100088	46.0931	0.0497121	20.224		1
CC_OL_013_P05	0.0555346		0.170175		0.158413	38.1234	-0.0627591	47.8871	0.0316296	9.03094		1
CC_OL_014_C14	0.145999		0.0452552		-0.15688		-0.154095	22.6047	0.182153	9.03094		1
CC_OL_014_D06	0.0942875		0.332578		0.184302	43.057	-0.193374	4.8009	0.394858	2.75107		1
CC_OL_014_L06	-0.230972		0.00812532		0.149287		-0.12107	22.6047	-0.101482	29.2273		1
CC_OL_015_C23	-0.0850317		-0.00790082		0.228319		0.465093	3.20256	0.617273	3.5488	10.1697	1
CC_OL_015_E13	0.237562		-0.0535588		0.218791		0.0811702	32.6536				1
CC_OL_015_E19	0.0892872		0.185253		-0.287197		-0.330488	47.8871	0.325932	2.75107		1
CC_OL_015_F21	0.0620091		0.219781		-0.350166		0.252814	9.83518	0.654776	5.00268	23.4266	1
CC_OL_015_G21	0.286042		-0.0566492		-0.16572		-0.0668245	47.8871	0.391301	7.5619		1
CC_OL_015_N12	-0.253855	25.6173	-0.0434007									1
CC_OL_016_G03	0.360675	16.5889	0.0856195		0.0722724	38.1234	0.13505	22.6047	-0.144101	30.7229		1
CC_OL_016_G08	0.137317		0.15344		0.188829	38.1234	-0.148659	22.6047	0.183886	25.5212		1
CC_OL_016_J22	-0.123743		-0.181636		-0.173201		-0.0955376	38.4179	0.0667785	20.224	36.3277	1
CC_OL_016_O05	0.0709458		-0.0377185		0.0864317	38.1234	-0.0723992	38.4179	0.390827	9.03094		1
CC_OL_016_P04	-0.0795661		-0.101641		0.19706	38.1234	-0.021464	38.4179	0.262759	9.03094	34.6406	1
CC_OL_017_I10	-0.158039		-0.0422802		-0.469721	3.94019	-0.128743	47.8871	0.310643	7.5619	37.9165	1
CC_OL_018_F11	0.139953		0.0258598		0.0189804		0.0331002	35.5353	0.346844	3.10331	23.4266	1
CC_OL_018_K09	-0.131073		0.317135						0.0426921	26.944		1
CC_OL_018_O24	-0.239839		-0.135827	38.9184	-0.0665478		-0.158041	35.5353	0.648037	4.15931	37.9165	1
CC_OL_018_P20	0.361776		0.143169		0.0489871		-0.0136053	38.4179	0.183846	20.224		1
CC_OL_019_J22	-0.022583		-0.585885	8.94721	-0.192779		-0.179162	47.8871	0.17476	20.224	45.3265	1
CC_OL_020_D01	-0.13428		0.226964		0.043037	38.1234	0.127196	44.7282	-0.0471868	26.944		1
CC_OL_020_L10	-0.294391		-0.244468		-0.0841702		-0.0488671		0.0482105	9.03094	34.6406	1
CC_OL_021_C04	0.262031	31.7794	0.392985		0.225604	31.928	0.419425	6.05121	0.133065	20.224		1
CC_OL_021_H04	0.276033		-0.320574		0.0763772		-0.052201	40.8976	0.0973387	20.224		1
CC_OL_021_H20	0.292415	49.1692	-0.0976324		-0.474442	14.2796	-0.129642		0.17183	20.224		1
CC_OL_021_P22	0.20155	35.6136	0.0487194		-0.151896		-0.219384	44.7282	0.169924	6.35742		1
CC_OL_022_D13	0.266609		0.0761508		0.0716225	31.928	0.24776	9.83518	0.183597	20.224		1
CC_OL_022_F05	0.433676	9.29258	0.397859		0.0648888	38.1234	-0.046226		0.0676333	26.944	49.6822	1
CC_OL_022_O05	0.0352835		-0.169672		0.0466514	38.1234	0.29927	13.6888	0.0824697	20.224	27.7537	1
CC_OL_023_B03	0.245479	49.1692	0.292591		-0.067284		-0.0686629	29.421	0.14413	25.5212		1
CC_OL_023_F06	0.280755	45.4405	0.247757		0.072841	38.1234	-0.166798	9.83518	0.11949	36.305		1
CC_OL_023_I02	-0.0625857		0.254689		-0.28137		-0.508891	40.8976	-0.0134421	29.9152		1
CC_OL_023_J06	0.269079	22.8534	-0.0347019		-0.0785901		0.0113956	35.5353	-0.152629	32.952		1
CC_OL_023_O01	0.19036		0.274574		0.0384096		0.116544	9.83518	0.082839	20.224		1
CC_OL_024_G02	0.0111795		0.171628		0.135826	31.928	-0.111014	44.7282	0.208892	9.03094		1
CC_OL_024_N15	-0.105106		-0.172243		-0.0973213		-0.563387	13.6888	-0.338783	5.00268		1
CC_OL_024_P09	0.224221		-0.251034		0.00804902		-0.124281	46.4495	0.231911	20.224		1
CC_OL_025_H06	-0.58854		-0.320282		-0.808243	0	-0.421386	2.49879	-0.626276	27.0897		1
CC_OL_025_I01	-0.0887446		-0.0601185		0.101714	31.928	0.499914	3.66522	0.455591	3.10331	31.3939	1
CC_OL_025_J17	0.177661	49.1692	-0.182352	38.9184	0.0545068		0.298351	16.9281	0.316603	3.5488	45.3265	1
CC_OL_025_K16	0.247874		0.167795		0.0616036	46.6521	-0.521242	1.90836	0.158316	9.03094		1
CC_OL_025_K23	0.242013		-0.04338		0.121346	38.1234	-0.16941	32.6536	-0.277862	26.944		1
CC_OL_026_G23	-0.252461				-0.22925		0.234236	7.50597	-0.00920984	35.4545		1
CC_OL_026_J21	-0.1789		0.236041		-0.215985		0.135624	22.6047	0.501569	20.224		1
CC_OL_026_K17	0.161761		0.378718		0.257838	31.928	-0.309439	42.9187	0.0336193	20.224		1
CC_OL_027_C11	0.123667		0.183649		-0.150362		-0.00235958	29.421	-0.0628118	30.7229		1
CC_OL_027_M22	0.375999	45.4405	0.169833		-0.197093		-0.291776	6.05121	0.430379	4.15931		1
CC_OL_027_N07	-0.302928		-0.0201494		-0.262938		-0.0495403	32.6536	0.166718	9.03094	23.4266	1
CC_OL_028_E01	-0.403232	28.3192	0.211485		-0.0571653		-0.0715661	46.0931	-0.00750348	36.305	40.1778	1
CC_OL_028_E23	-0.0834835		0.131757		0.179639	31.928	0.26937	7.50597	0.361562	9.03094	19.7688	1
CC_OL_028_H18	0.240366	45.4405	-0.0333914		0.0359275		0.449037	13.6888	0.477698	2.75107		1
CC_OL_028_I01	-0.0588251		-0.150559		-0.0366184		0.247386	13.6888	-0.0237373	32.346		1
CC_OL_028_I09	0.147201		-0.115012		0.165393	38.1234	-0.149859	49.3629	0.219376	20.224		1
CC_OL_028_J11	0.262073	49.1692	-0.069277		-0.0313786		0.0148186		0.390154	5.00268		1
CC_OL_028_K18	0.233201		-0.0527018				0.211712	9.83518	0.0443719	9.03094		1
CC_OL_028_O03	0.243874	45.4405	0.11489		0.0803358	38.1234	0.0228242	22.6047	-0.280134	26.944		1
CC_OL_029_C14	-0.380008	19.5692	-0.399152		-0.228839		-0.214503	49.5597	0.192709	20.224	15.748	1
CC_OL_029_E24	-0.0282877		-0.0266157		-0.012957		-0.0621511	46.4495	0.453754	2.75107	29.4675	1
CC_OL_029_F06	-0.0273695		0.162876		-0.01849	43.057	-0.00842966		0.416964	4.15931		1
CC_OL_029_G06	-0.0447386		0.0558604		-0.0491554		-0.150054	35.5353	0.245502	9.03094		1
CC_OL_029_O20	0.0604979		-0.0637141		-0.262477		-0.033464		0.350455	9.03094	45.3265	1
CC_OL_030_J11	-0.0446391		-0.09158		0.241284	31.928	-0.000365985		0.568006	2.75107	21.572	1
CC_OL_030_J19	-0.131141		0.282457		0.0109917		-0.0372561		0.349884	5.47181	18.5261	1
CC_OL_030_O08	-0.352337		0.162075		0.00721939	43.057	0.0539561	49.3629	0.56693	4.15931	14.3112	1
CC_OL_031_H07	0.291662		-0.0448168		0.0725005	43.057	-0.101997	32.6536	0.0771153	22.8514		1
CC_OL_031_H18	0.0305944	49.1692	0.124918		-0.0172892		-0.00181822		0.0855265	25.5212		1
CC_OL_031_J23	0.292696	31.7794	0.229037		-0.14706		-0.30922	9.83518	0.201006	20.224		1
CC_OL_031_N15	-0.172874		0.077722		-0.0106971		-0.147807	42.9187	0.163493	26.944		1
CC_OL_032_C12	-0.140709				-0.11245		0.367577	16.9281	0.834131	3.10331	27.7537	1
CC_OL_032_E16	0.0204277		0.0119374		-0.241647	31.928	-0.399328	6.05121	-0.0416871	29.2273		1
CC_OL_032_G08	0.104512		-0.214388		0.201272	31.928	-0.206545	9.83518	0.185592	7.5619		1
CC_OL_032_J13	0.483025	31.7794	0.12826		-0.00819061		-0.462246	0.735115	-0.221314	27.0897	25.2603	1
CC_OL_032_L17	0.0994022		-0.187082	38.9184	0.094527		0.0917434	38.4179	0.450129	20.224	49.6822	1
CC_OL_032_O22	0.0538438		-0.177174		0.0801478	46.6521	0.0690283		0.353559	5.00268	47.8336	1
CC_OL_033_B03	-0.0992024		0.417842		0.24756	31.928	0.24515	9.83518				1
CC_OL_033_C06	0.366438	22.8534	0.38866		0.100571	43.057	0.91758	1.29953	0.114445	9.03094		1
CC_OL_033_N10	0.0239289		0.266702		-0.501441	46.6521	0.0358312	22.6047	0.101868	26.944		1
CC_OL_033_P15	0.0856778		-0.118145		-0.142618		-0.334504	0.584132	0.324269	6.35742		1
CC_OL_034_A05	0.056182		0.167589		0.0706298	43.057	-0.130087	13.6888	-0.0595229	26.944		1
CC_OL_034_A06			0.241561		-0.143627		0.0325516	46.0931	-0.0640048	30.7229		1
CC_OL_034_C06	-0.142737		-0.00422961		0.137214	46.6521	0.246178	9.83518	0.0598931	26.944	45.3265	1
CC_OL_034_G20	-0.0783886		-0.397465	38.9184	0.172346		-0.278815	22.6047	-0.0471628	36.305		1
CC_OL_034_J11	-0.126735		-0.159689		0.181555	31.928	-0.0273707	40.8976	0.149776	9.03094	43.6613	1
CC_OL_035_E09	-0.248939		-0.168356		0.438952	31.928	-0.0417724	49.3629	0.331378	20.224	36.3277	1
CC_OL_001_C20	0.139954		0.210974		0.355884	15.759	-0.516619	0	-0.237109	34.9462	45.3265	2
CC_OL_001_F08	0.0346173		-0.271589		-0.129594		-0.297508	46.7771	0.306102	9.03094		2
CC_OL_001_H13	-0.45725		-0.131739	38.9184	-0.231648		0.0536744	22.6047	0.196926	20.224	34.6406	2
CC_OL_001_H23	-0.165083		-0.229151	38.9184	-0.187021		-0.0795687	46.0931	0.288597	5.00268	9.61028	2
CC_OL_001_O15	0.0206923		-0.0698371		-0.0334814		0.177654	46.0931	0.67984	7.5619	45.3265	2
CC_OL_001_O20	0.0591203		0.0376585		-0.0321019		0.00472111	40.8976	0.276788	5.47181	23.4266	2
CC_OL_002_B24			-0.432449	36.199			0.3023	9.83518	0.464234	9.03094		2
CC_OL_002_C11	0.136522		0.203908		0.218454	31.928	-0.148443	13.6888	0.31414	9.03094		2
CC_OL_002_G04	0.0965449		-0.313445	38.9184	-0.128563		0.00854754		0.18031	22.8514		2
CC_OL_002_J23	0.0047361	45.4405	-0.207163		0.0157273		0.0338705	44.7282	0.344359	9.03094	21.572	2
CC_OL_002_O11	-0.386835	10.5894	-0.420052		-0.375907		-0.208138		0.057885	9.03094	12.6241	2
CC_OL_002_P03	0.394045	31.7794	-0.29801		-0.0405028		-0.0867526	49.5597	0.42896	5.47181		2
CC_OL_002_P19	-0.232444		-0.00960253		-0.176742		-0.0834094	46.0931	0.181464	9.03094	21.572	2
CC_OL_003_C14	-0.145286		-0.950972	25.3071	-0.216479		0.159484	22.6047	0.777934	7.5619	25.2603	2
CC_OL_003_F23	-0.196837		-0.0748236		0.121125		0.394133	13.6888	0.157746	9.03094	9.08296	2
CC_OL_003_G14	0.00399824		-0.0650496		0.148418	43.057	-0.378566	35.5353	0.253725	9.03094		2
CC_OL_003_J12	0.262619		0.253352		0.242377	31.928	0.780146	0.735115	0.817027	4.15931	40.1778	2
CC_OL_003_J19	0.618439	13.7761	0.612723	25.3071	0.197988		0.26694	22.6047	1.65818	0.800515		2
CC_OL_004_C11	0.092189		0.0263879		0.363867	15.759	0.387399	13.6888	0.0291349	20.224	47.8336	2
CC_OL_004_C18	0.0367271		-0.241322		-0.10561		0.123503	32.6536	0.4346	3.10331	27.7537	2
CC_OL_004_C21	-0.0728152		0.0530299		-0.128162		0.0199378	29.421	0.221506	9.03094	36.3277	2
CC_OL_004_P20	0.186358	49.1692	0.378029		-0.0932827		-0.055256		0.0586739	36.305		2
CC_OL_005_C12	-0.173129				0.0220129		-0.0833607	46.0931	0.296613	20.224	29.4675	2
CC_OL_005_E17	0.667026	35.6136	-0.0499598		-0.24647		-0.107123	16.9281	0.0649204	26.944		2
CC_OL_005_E18	0.0188612		0.0427465		-0.266837		0.0966836	35.5353	0.0844386	20.224		2
CC_OL_005_F06	-0.0418226		-0.0223169		-0.158743		-0.137219		0.307024	4.15931	34.6406	2
CC_OL_005_G19	0.464942	9.29258	0.570558		0.577823	12.334	0.275513	9.83518	0.435076	7.5619		2
CC_OL_005_G20	0.197216		0.120941		-0.25355		-0.248611	40.8976	0.391717	3.10331		2
CC_OL_005_P04	-0.00582247		0.107244		-0.165867		0.18135	13.6888	0.307536	9.03094		2
CC_OL_006_C16	-0.0348969		-0.213871	38.9184	0.00475504		-0.133578	32.6536	0.341254	22.8514	37.9165	2
CC_OL_006_D05	0.0917989		0.15863		-0.0472353		-0.0968702		-0.00384016	9.03094		2
CC_OL_006_E10	0.243623		0.225634		-0.282842	15.759	-0.187199	7.50597	0.536266	20.224		2
CC_OL_006_G02	-0.118242		-0.282671	38.9184	-0.040204		-0.0169664	29.421	0.162917	9.03094	37.9165	2
CC_OL_007_F08	-0.0691125		0.126926		-0.137326		0.0531635	13.6888	0.0446323	22.8514		2
CC_OL_007_F13	-0.442889		-1.42258	0	-0.400906	4.7587	-0.303164		0.0247708	9.03094	29.4675	2
CC_OL_007_G03	0.0293153		0.163676		-0.0220305		0.0828908	22.6047	0.170857	4.15931		2
CC_OL_007_I04	0.0775865		-0.198056		-0.000165959	46.6521	-0.0639393	49.3629	0.000932554	22.8514		2
CC_OL_007_J23	-0.94585		-0.27988		-0.0401105		-0.0588969	47.8871	0.0894486	20.224	27.7537	2
CC_OL_007_L07	-0.0224073		-0.446991	38.9184	-0.162143		-0.113899	44.7282	0.249089	4.15931		2
CC_OL_007_M20	0.247151	21.354	-0.0158438		0.275685		0.026089	29.421	0.666075	1.1548		2
CC_OL_008_A03	-0.0772676		0.0102374		-0.0989343		0.106677	16.9281	0.281649	5.00268	40.1778	2
CC_OL_008_F17	-0.0780075		0.0647017		-0.00470653	46.6521	0.25338	13.6888	-0.0688941	30.7229	40.1778	2
CC_OL_008_G04	-0.133087		0.110587		0.145141	38.1234	0.081107	16.9281	0.266696	9.03094	10.1697	2
CC_OL_008_G15	0.00580903		-0.31423		-0.0647175		0.0372695		0.17732	9.03094		2
CC_OL_008_K16	0.0372213		-0.259295		0.0567533		0.142647	35.5353	-0.0166298	36.305		2
CC_OL_008_L08	0.00934509		0.193104		-0.0880624		0.0520603	32.6536	0.203893	9.03094	49.6822	2
CC_OL_008_M10	-0.440404	16.5889	-0.195907		-0.282662		-0.117249	38.4179	0.327616	20.224	14.3112	2
CC_OL_009_B13	-0.0356761		-0.0197467		-0.0771616		0.364622	9.83518	0.88052	2.75107	18.5261	2
CC_OL_009_E01	0.371781	31.7794	-0.0968019		0.021609		0.28181	22.6047	-0.0259458	20.224		2
CC_OL_009_G01	0.070383		-0.295888	38.9184	0.177651		0.210364	22.6047	0.253761	9.03094		2
CC_OL_009_I01	0.267372	41.8869	0.0504356		0.0782779		0.144313	13.6888	0.18033	9.03094		2
CC_OL_009_I22	-0.0735397		-0.651155	30.5514	-0.121392		-0.15128	46.4495	0.285735	20.224	25.2603	2
CC_OL_009_J20	0.279257	35.6136	0.369805		0.328119	31.928	0.229519	13.6888	1.1289	0	21.572	2
CC_OL_009_N18	0.363535	31.7794	0.298588		0.304879	31.928	0.509918	4.8009	0.900748	5.00268	47.8336	2
CC_OL_009_P10	0.0678915		-0.170508		-0.541781	9.9843	-0.291636	29.421	-0.0449399	36.305		2
CC_OL_010_M22	0.478258		0.233511		0.141443		0.15134	29.421	1.08994	3.5488	29.4675	2
CC_OL_010_P19	-0.000385245		0.155242		-0.11796		0.00497281		0.420459	9.03094		2
CC_OL_011_A05	-0.26528		-0.164653		-0.16367		-0.0433275		0.176729	20.224	18.5261	2
CC_OL_011_C07	0.382952	22.8534	0.290198		0.414296	15.759	0.295601	9.83518	0.208786	20.224		2
CC_OL_011_G03	0.0438783				-0.181264		0.248477	7.50597	0.141513	26.944		2
CC_OL_011_G13	-0.00590588		-0.432855	32.5973	-0.148149		-0.0635646	22.6047	0.254367	5.00268		2
CC_OL_011_J02	0.0882212		0.482256		0.141369	43.057	-0.0459343	49.5597	0.259821	9.03094		2
CC_OL_011_M13	0.145757		-0.174232		-0.252453	38.1234	0.279825	9.83518	-0.0516069	32.952		2
CC_OL_011_M15	0.00184876		0.0121884		-0.0199049	46.6521	0.0555419	29.421	-0.121859	27.0897		2
CC_OL_011_N24	0.0077166		-0.0246838		-0.103658		-0.225896	46.4495	0.535033	9.03094	49.6822	2
CC_OL_011_O15	-0.27398		-0.143093		-0.214148		-0.275066	3.20256	0.0662876	20.224		2
CC_OL_012_B02	0.0169808		-0.12591		0.0469976	43.057	0.17788		-0.177703	26.944		2
CC_OL_012_C15	-0.0492802		0.35692		0.167366	38.1234	-0.115619	44.7282	0.0654834	20.224		2
CC_OL_012_F13	-0.402743	5.92376	-0.0429171		-0.0774339		0.427215	6.05121	0.0354311	20.224	19.7688	2
CC_OL_012_G04	0.428069	19.5692	0.315404		0.142877		0.0131867	22.6047	0.331925	9.03094		2
CC_OL_012_G15	0.0161944		0.0405075		-0.290216				0.058517	20.224	49.6822	2
CC_OL_012_H03	0.0354917		0.0924638		0.149419	31.928	0.289901	9.83518	0.612249	4.15931	12.7645	2
CC_OL_012_J01	-0.0389342		0.175556		-0.246145		0.0421939	38.4179	-0.0417243	29.9152		2
CC_OL_012_J14	-0.147691				-0.233687		-0.344171	42.9187	0.297202	3.10331		2
CC_OL_012_M09	0.195334	45.4405	-0.174849		-0.00293297		-0.23216	46.7771	0.657897	9.03094		2
CC_OL_012_O15	0.308778	35.6136	0.201224		0.031265				0.63863	9.03094		2
CC_OL_012_P02	0.28685	45.4405	-0.117195		-0.0250053		0.115533	16.9281	0.3403	20.224		2
CC_OL_013_B15	-0.0336947		0.0852566		0.21207				0.205872	5.00268		2
CC_OL_013_E07	-0.00963098		-0.0429522				0.352898	22.6047	-0.0106725	20.224		2
CC_OL_013_E08	0.142099	45.4405	0.0942729		0.00204862				0.141458	26.944		2
CC_OL_013_H01	-0.247134		-0.116978		-0.186021		0.164698	22.6047	0.386097	9.03094	49.6822	2
CC_OL_013_O08	0.0639942		-0.226385		0.0856396		-0.1008	29.421	-0.0286631	26.944		2
CC_OL_013_O19	0.0297191		-0.407346	38.9184	-0.313456	15.759	-0.490297	29.421	0.138763	20.224		2
CC_OL_013_P01	-0.0769348		-0.0193429		0.184865	38.1234	0.241528	9.83518	0.432815	3.5488	25.2603	2
CC_OL_014_C22	0.00535388		-0.329427	38.9184	-0.251094		-0.11165	44.7282	0.277811	20.224		2
CC_OL_014_F24	0.0847038								0.931156	9.03094		2
CC_OL_014_H18	0.108239	41.8869	0.00217969		0.0174928	46.6521	-0.0251664	29.421	0.491532	9.03094		2
CC_OL_014_I05	0.186744		-0.0972675		-0.0480298		0.235555	13.6888	0.285299	7.5619	47.8336	2
CC_OL_014_I16	-0.100821		0.230707		-0.259873		0.00777208		0.430998	5.47181	47.8336	2
CC_OL_014_J04	0.0723689		-0.252076	38.9184	0.0774069		0.0398498	35.5353	0.154234	26.944	49.6822	2
CC_OL_014_L05	0.0896417		0.0778076		-0.142992		-0.264822	16.9281	0.0347821	9.03094		2
CC_OL_014_O12	-0.00182413		-0.115988		0.213398	31.928	-0.119685	47.8871	0.267958	7.5619		2
CC_OL_014_P06	0.0368059		0.122679		-0.0745612		-0.119286	29.421	0.336584	9.03094		2
CC_OL_015_B18	-0.0556142		0.114702		-0.0476737		-0.0753859	46.4495	0.534923	2.02696	18.5261	2
CC_OL_016_B22	0.294628		0.16612		-0.0509655		-0.158066	35.5353	0.526826	3.10331		2
CC_OL_016_D09	0.0375304		0.0325267		0.0073312		-0.0108355	42.9187	0.559653	20.224		2
CC_OL_016_E18	-0.130073		0.0702946		-0.275438		0.0146047	29.421	0.118993	20.224		2
CC_OL_016_H13	-0.186117		-0.412245	36.199	-0.307018		-0.175485	3.66522	0.213774	26.944	43.6613	2
CC_OL_016_J14	-0.232482		0.121149		0.185264	38.1234			0.224633	22.8514		2
CC_OL_016_L09	0.310386		-0.087033		-0.146508		0.191997	35.5353	-0.0473566	26.944		2
CC_OL_017_B16	-0.106948		0.319001		-0.141117		0.00149587	29.421	0.151699	9.03094		2
CC_OL_017_D14	0.215032	49.1692	-0.457113	38.9184	0.167804	31.928	0.40072	7.50597	0.603702	5.00268	36.3277	2
CC_OL_017_J02	-0.0932503		0.0984963		-0.0369556		0.0936501	29.421	0.345347	3.10331		2
CC_OL_017_J23	-0.101541		-0.458991	38.9184	-0.476587		-0.190595	32.6536	0.606529	7.5619	40.1778	2
CC_OL_018_B04	0.0174919		-0.0814711		-0.0239668		0.175192	9.83518	0.00322395	26.944		2
CC_OL_018_D01	-0.172864		0.116464		0.100913	38.1234	0.0443938	22.6047	0.176725	34.6792		2
CC_OL_018_M04	0.0658353		0.172799		-0.0553811		-0.0639329		0.139326	26.944		2
CC_OL_019_H08	-0.0684594		-0.130279		-0.0469758		-0.13794	35.5353	0.0238412	26.944		2
CC_OL_019_J10	0.106866		-0.34032	38.9184	-0.56255		-0.263498	32.6536	0.231267	9.03094	49.6822	2
CC_OL_019_K01	0.043145		-0.382945	38.9184	-0.223605		-0.143711	42.9187	-0.177654	26.944		2
CC_OL_020_F21	-0.195688		-0.320772	38.9184	-0.230326		0.0956115	35.5353	0.209394	9.03094	18.9075	2
CC_OL_020_P16	0.00456342		-0.34396	38.9184	0.0705814		0.0551667	22.6047	0.122703	26.944		2
CC_OL_021_B02	0.115155		-0.447677		0.0961941		-0.00789454	46.0931	0.162853	20.224		2
CC_OL_021_B11			0.0165686		-0.180558				0.106153	9.03094		2
CC_OL_021_E01	0.255161	28.3192	-0.00285579		-0.263543		0.074598	13.6888	0.341721	4.15931		2
CC_OL_021_F02	-0.221714				-0.0785615		0.213641	13.6888	0.0994948	20.224		2
CC_OL_021_I21	0.165233		0.193635		-0.164303		-0.0233693	49.5597	0.419943	1.85298	49.6822	2
CC_OL_021_I24	-0.0674756		-0.0423593		0.337797		0.184887	16.9281	0.126948	9.03094	45.3265	2
CC_OL_021_K02	-0.055823		0.0200145						0.100929	9.03094		2
CC_OL_021_L15	-0.0319203		-0.133498		-0.111078	46.6521	0.072916		0.375275	9.03094	45.3265	2
CC_OL_021_M24	0.103559		0.153427		0.17592	43.057	-0.0775609	47.8871	0.79049	1.85298	23.4266	2
CC_OL_021_O05	-0.158276		-0.0815133		-0.219872		-0.0329449		0.379902	5.47181	49.6822	2
CC_OL_021_P24	0.473355	31.7794	-0.0415776		0.340797	14.2796	0.427847	6.05121	1.42575	0.924838	18.5261	2
CC_OL_022_N05	-0.0940232		-0.311147		-0.409239	15.759	-0.0431677		0.126602	26.944		2
CC_OL_022_N15	-0.39398	24.3556	0.125877		-0.0456777		-0.421157	40.8976	0.0730701	36.305	41.5181	2
CC_OL_023_C05	-0.164884		-0.116864		-0.300854	46.6521	-0.0616585	40.8976	0.12546	20.224	37.9165	2
CC_OL_023_F01	0.0643564		-0.369758	38.9184	-0.028158		0.293302	13.6888	0.359256	9.03094	36.3277	2
CC_OL_023_H04	0.227672		-0.0107644		0.0978968		-0.219531	1.90836	0.199958	9.03094		2
CC_OL_023_H23	0.264826	49.1692	0.38264		0.143212		0.157588	16.9281	0.463324	2.36043		2
CC_OL_023_I23	-0.00987316		0.0822312		0.0529844	46.6521	0.53378	6.05121	1.20057	0.800515	10.1697	2
CC_OL_023_K11	-0.156292		0.402572		-0.435419		0.157175	22.6047	-0.147197	27.9187		2
CC_OL_023_N04	-0.221565		0.495609				-0.0439017					2
CC_OL_023_O02	-0.170242		-0.358715	38.9184	-0.442735	3.94019	-0.186019	16.9281	0.0969483	26.944	47.8336	2
CC_OL_024_A16	0.186118		0.570745	32.5973	0.114211	38.1234	0.623741	6.05121	0.657852	9.03094	47.8336	2
CC_OL_024_L15	0.276433	45.4405	0.217691		-0.360744		-0.137049		0.227244	3.10331		2
CC_OL_024_O08	-0.0331396		-0.0102571		-0.190288		-0.467027	35.5353	0.252059	9.03094		2
CC_OL_024_P04	-0.989564	0	-0.276641		-0.621649	1.44109	-0.109913	44.7282	0.129073	9.03094	9.08296	2
CC_OL_024_P07	-0.273418		-0.050283		-0.240235		-0.245385	46.0931	0.153846	20.224	31.3939	2
CC_OL_025_B02	0.0163573		-0.217534		-0.0955841		-0.0704855	49.3629	-0.0362433	33.9669		2
CC_OL_025_B05	0.00917421		0.0791878		0.101293	38.1234			0.364191	6.35742	25.2603	2
CC_OL_025_G06	-0.226887	41.8869	0.0385749		-0.126769		0.0481278	22.6047	0.354806	20.224		2
CC_OL_025_L14	0.151764		-0.305804		0.0485747		-0.157525	46.0931	-0.0444004	20.224		2
CC_OL_026_A14	0.00474037		0.232103		-0.101563				0.311414	20.224		2
CC_OL_026_H06	0.06243		-0.202305		-0.403858				-0.498182	27.0897		2
CC_OL_026_O14	-0.215604		-0.14625		-0.119436		0.032647	22.6047	0.0615089	34.9462	41.5181	2
CC_OL_027_B08	-0.25737		0.176167		-0.0842544				0.167487	20.224		2
CC_OL_027_G20	0.0879801		-0.386411		-0.0975292		-0.252914	46.0931	0.150585	20.224		2
CC_OL_027_M02	0.107487		0.0537124		-0.370991		-0.180884	46.0931	0.360509	20.224		2
CC_OL_027_O05	0.0318861		0.131224		-0.076738		-0.29221		0.115736	9.03094		2
CC_OL_027_O18	0.0109217		0.0746123		-0.0210679		-0.0178246	22.6047	0.250438	20.224	37.9165	2
CC_OL_028_C05	0.101354		0.206147		-0.0296652				0.0460221	30.7229		2
CC_OL_028_F17	-0.104439		-0.105538		-0.310778		0.150809	22.6047	0.137561	20.224	36.3277	2
CC_OL_028_G09	-0.00420154				-0.433541	4.7587	-0.148966	46.4495	0.265577	5.47181		2
CC_OL_028_G18	0.0667805	41.8869	-0.293339	36.199	-0.151829		-0.170585	46.7771	0.282743	4.15931	41.5181	2
CC_OL_028_H12	-0.0822167		-0.472333	15.1433	-0.0818489		0.0544925	29.421	0.0795564	9.03094	18.9075	2
CC_OL_028_H24	0.0706157		-0.0418117		-0.062341		-0.0830705	42.9187	0.494356	5.47181	45.3265	2
CC_OL_028_K07	0.529698	5.90913	0.167588		0.218282	31.928	-0.0410815	46.0931	0.0409157	22.8514	41.5181	2
CC_OL_028_K22	0.261209	49.1692	-0.232913		0.260036	31.928	-0.0430305	49.3629	0.28238	7.5619		2
CC_OL_028_P20	-0.124257						-0.147309	16.9281				2
CC_OL_029_B20	-0.101886		0.00795344		0.108116		-0.162662	9.83518	0.0874867	26.944		2
CC_OL_029_I13	0.322932	49.1692	0.320132		0.129932	31.928	-0.12347	32.6536			9.61028	2
CC_OL_029_K10	0.119991		-0.306007		-0.049714	46.6521	-0.0644563	47.8871	-0.134814	27.9187		2
CC_OL_029_L03	0.0044853		0.0228132		-0.0879333		-0.0498742	42.9187	0.0216191	36.305		2
CC_OL_029_N22	0.167395		0.00748649		0.0775699		-0.0724568	47.8871	0.424246	9.03094	41.5181	2
CC_OL_030_C05	-0.1531		0.315897						0.0135878	20.224		2
CC_OL_030_D23	0.143662		-0.490809	18.7392	-0.0216375		-0.261527	1.90836	0.468362	2.75107		2
CC_OL_030_K21	0.137559		-0.188696		0.00764869		0.480557	0.423656	0.742407	3.5488	12.7645	2
CC_OL_030_N21			0.173067						0.0640702	34.6792		2
CC_OL_031_J02	0.171874	49.1692	0.608321		-0.218611		-0.290196	40.8976	-0.154249	36.305	45.3265	2
CC_OL_032_J19	-0.317249	25.6173	0.00556235		-0.172726		0.213674	7.50597	0.383932	6.35742	12.7645	2
CC_OL_032_L01	-0.166968		-0.104231		0.1298	38.1234	0.0855214	29.421	0.620684	3.5488	21.572	2
CC_OL_033_A10	0.156872		0.270391		0.14748	46.6521	-0.419292	0.584132	0.252741	9.03094		2
CC_OL_033_G04	0.0187132		-0.109094		0.256565	38.1234	-0.166318	22.6047	0.108296	26.944		2
CC_OL_033_G13	0.198749		-0.183413		-0.0460784		0.232245	9.83518	0.436203	6.35742	41.5181	2
CC_OL_033_G16	0.172183		-0.273669		0.0589019		0.0920301	29.421	0.431819	20.224		2
CC_OL_033_I02	0.261154		-0.0299982		-0.0207479		0.392526	13.6888	0.453465	2.36043		2
CC_OL_033_J02	0.53541	45.4405					0.432559	7.50597	1.10348	0	18.9075	2
CC_OL_034_B20	0.0560583		0.259658		-0.0311722	43.057	-0.0447682		-0.0516692	36.305		2
CC_OL_034_E24	0.322883		0.410136		0.396361	6.55539	0.512146	9.83518	1.07066	3.5488	21.572	2
CC_OL_034_L01	0.135324	49.1692	0.116692		0.377614	14.2796	0.156256	29.421	0.403347	9.03094		2
CC_OL_035_B19	-0.0131418		-0.0556618		-0.145698		-0.328449	47.8871	0.189125	9.03094		2
CC_OL_035_F09	0.134981		0.0699916		0.176818	31.928	-0.115452	9.83518	0.486016	7.5619		2
CC_OL_001_B04	-0.0534364		0.302316		-0.0827743		-0.327647	40.8976	0.0924242	26.944		3
CC_OL_001_B07	0.270435	35.6136	0.272383		0.0142959	46.6521	-0.151162	49.3629	-0.18239	28.5389	49.6822	3
CC_OL_001_B16	0.0705935		-0.184099		-0.0105508	46.6521	0.142806	22.6047	0.118034	9.03094	49.6822	3
CC_OL_001_C02	-0.425674		-0.263056		-0.527542	6.55539	-0.163868	38.4179	-0.118066	29.2273		3
CC_OL_001_C22	0.370014	16.5889	0.711825		0.611595	15.759	0.732178	4.8009	0.97687	4.15931	27.7537	3
CC_OL_001_E05	0.554159	16.5889	0.10111		0.907916	31.928	0.552766	4.8009	0.149969	20.224		3
CC_OL_001_F05	0.653918	49.1692	-0.281641	38.9184	0.13967	38.1234	-0.226313		-0.151585	35.9982		3
CC_OL_001_F10	-0.158037		0.162886		0.0450694		0.0112219		0.101992	26.944		3
CC_OL_001_F20	0.0351818		-0.243307	38.9184	-0.138577		-0.411633	32.6536	-0.960294	27.0897	19.7688	3
CC_OL_001_G05	0.0997256		0.343061		-0.107768	46.6521	0.00828697	42.9187	-0.000988618	32.952		3
CC_OL_001_G19	0.100296		0.272628		0.091253	31.928	-0.0164588	44.7282	0.353397	9.03094		3
CC_OL_001_H09	0.0153896		-0.0600055		0.0193701		-0.111613	46.0931	0.165676	5.47181	36.3277	3
CC_OL_001_H10	0.749232	2.89033	-0.156255		0.222039	31.928	-0.0179061	49.3629	0.167603	9.03094	45.3265	3
CC_OL_001_I08	0.0484225		0.129695		-0.125501		-0.239575	9.83518	0.103449	22.8514		3
CC_OL_001_I24	0.0600856		-0.000772292		-0.199559		-0.28666	16.9281	0.25714	3.5488		3
CC_OL_001_L21	0.113782	45.4405	0.267274		-0.000902192		-0.134823	40.8976	0.00621651	26.944		3
CC_OL_001_N17	0.132573		0.339871		0.0712455		0.139558	16.9281	0.0379976	20.224		3
CC_OL_001_O03	-0.142019		-0.305727	38.9184	-0.227231		-0.459573	0.584132	-0.338775	33.9669		3
CC_OL_001_O09	0.263144	31.7794	-0.0259798		-0.14244		0.0267488	22.6047	0.0739929	20.224		3
CC_OL_001_O11	-0.166603		0.146813		-0.206652		0.0295535	46.0931	-0.0557587	36.305		3
CC_OL_001_O13	0.125373	49.1692	0.167334		-0.0794936		-0.216895	49.5597	-0.105095	36.305		3
CC_OL_001_O19	0.121931		-0.107974		-0.00379111	43.057	0.104136	29.421	0.725702	5.00268	25.2603	3
CC_OL_001_O24	0.199152		0.160577		-0.0972243		-0.0055332	46.7771	-0.237162	27.0897		3
CC_OL_001_P21	0.0185966		0.0241974		-0.00669166		0.204154	29.421	0.19053	5.00268		3
CC_OL_001_P23	-0.168861		-0.249256		-0.239055		-0.19559		-0.169886	27.4543		3
CC_OL_002_A04	0.160743		0.00131591		-0.0215545		0.149619	16.9281	-0.0693096	36.305		3
CC_OL_002_A12	-0.358211	35.6136	0.0842051				-0.205969	32.6536	-0.226213	32.952		3
CC_OL_002_B02	-0.00601617		0.593444						-0.251096	32.346		3
CC_OL_002_B06			0.117106				-0.0488681	13.6888	-0.327316	29.9152		3
CC_OL_002_B21	-0.153372		-0.171067		0.0710618		-0.275186	6.05121	-0.131097	29.9152		3
CC_OL_002_C06	-0.150564		0.177013		0.321267	15.759	0.0290763	46.7771	-0.11772	32.952		3
CC_OL_002_D10	-0.142565		-0.164202	38.9184	-0.027754		-0.217185	46.0931	0.0743206	9.03094		3
CC_OL_002_E19	-0.189163		-0.164695		-0.0118114		-0.0367487	49.5597	0.11532	20.224	49.6822	3
CC_OL_002_E21	0.351797	35.6136	0.131235		0.0248802		0.0214221	46.0931	0.0782306	20.224		3
CC_OL_002_E23	0.135493		0.330041		0.271765	31.928	0.503142	7.50597	0.424919	6.35742	37.9165	3
CC_OL_002_F07	0.14404		0.0910994		-0.21506		-0.160165	9.83518	0.45178	4.15931	47.8336	3
CC_OL_002_G01	0.0563507		0.307966		-0.236639		-0.310104	40.8976	-0.00316632	26.944		3
CC_OL_002_G21	-0.067425		0.0501964		0.0201074		0.060772	38.4179	0.0882341	22.8514		3
CC_OL_002_H24	0.00788926		0.119086		0.198985	31.928	0.00358539	49.3629	0.146039	9.03094		3
CC_OL_002_K11	0.00842023		-0.0196638	38.9184	0.0259239		-0.12307		0.0446496	26.944		3
CC_OL_002_K14	0.176379		-0.354951		0.0694643	38.1234	-0.0961787	29.421	0.193367	6.35742	49.6822	3
CC_OL_002_K19	0.0194344		0.0998755		-0.086641		-0.137552	46.0931	0.107383	22.8514		3
CC_OL_002_L02	-0.280041		-0.0669614		-0.26937		0.0320894	38.4179	-0.00514128	36.305	47.8336	3
CC_OL_002_M08	-0.13232		-0.0444645		0.122079	46.6521	-0.0346075		0.130785	9.03094		3
CC_OL_002_O08	-0.100718		0.659687		0.113375	46.6521	0.0693139	22.6047	0.145404	9.03094		3
CC_OL_003_F15	-0.177631		0.155646		-0.642285		0.272285	16.9281	0.296789	20.224		3
CC_OL_003_F16	-0.0765231		0.0644004		0.219387	38.1234	0.128349	22.6047	0.0767434	34.3739		3
CC_OL_003_G18	0.016117		0.17105				0.243769	7.50597	0.131803	20.224		3
CC_OL_003_I04	0.200012		0.0874605		0.0448843		-0.0201833	16.9281	-0.0451104	26.944		3
CC_OL_003_J04	0.103728		0.179786		-0.228433		0.0117741	35.5353	0.161803	26.944		3
CC_OL_003_J06	0.063424		-0.468364	38.9184	-0.484276		-0.0809197	49.5597	0.171698	7.5619		3
CC_OL_003_K14	0.142866		-0.0562247		0.0667548	31.928	0.218259	16.9281	0.0160027	25.5212		3
CC_OL_003_K19	0.110691		0.332776		-0.0537581		0.180292	22.6047	0.464439	5.47181	27.7537	3
CC_OL_003_O17	-0.178839		-0.281302	38.9184	-0.322758	43.057	-0.318186	16.9281	0.022607	25.5212	47.8336	3
CC_OL_003_P08	-0.11557		0.16161				-0.0434279	29.421	-0.375444	26.9885		3
CC_OL_004_A05	0.478188		-0.331181		0.145299	31.928	-0.158421	38.4179	-0.311623	27.0897		3
CC_OL_004_A13	0.314844	31.7794	0.4566		0.560801	12.334	0.710086	0.423656	0.36806	5.47181		3
CC_OL_004_B01	-0.0246112		-0.327608		-0.105077		0.49424	7.50597	0.338174	5.00268	27.7537	3
CC_OL_004_C05	-0.00627694		-0.00927884		0.0969374	38.1234	-0.213746	7.50597	-0.0106502	36.305		3
CC_OL_004_C08	0.314252		-0.282185	38.9184	0.2401	31.928	0.149994	16.9281	0.412036	3.10331	40.1778	3
CC_OL_004_C14	-0.219396		-0.0459316		-0.342297		-0.00250175	29.421	0.366482	3.5488	15.748	3
CC_OL_004_C20	0.339992	19.5692	-0.217365		0.13286	31.928	-0.0201621	29.421	-0.14147	36.305		3
CC_OL_004_D05	-0.0607056		-0.49848	38.9184	-0.612573	4.7587	-0.123138	9.83518	-0.144593	29.9152		3
CC_OL_004_D06	0.283924	45.4405	0.289263		-0.137796		-0.106694	49.5597	-0.0429353	35.8456	40.1778	3
CC_OL_004_D07	0.322639	21.354	-0.202473		0.0578795	31.928	-0.063779	49.5597	0.149018	20.224		3
CC_OL_004_D18	0.350385	28.3192	0.300943		-0.0608068		0.0177778	22.6047	0.0505229	9.03094		3
CC_OL_004_E14	0.193957		0.213862		0.158112	15.759	0.258351	9.83518	0.227997	20.224		3
CC_OL_004_E17	0.232722	35.6136	0.137153				0.193424	13.6888	0.167635	9.03094		3
CC_OL_004_E18	-0.104565		0.484434		-0.141288		0.0776969	32.6536	0.0241976	22.8514		3
CC_OL_004_F05	-0.0115518		0.0153271		-0.0197888		0.673328	9.83518	0.455717	4.15931	41.5181	3
CC_OL_004_F09	0.30582	31.7794	-0.0438148		0.164578		-0.352236	1.29953	0.00693305	26.944		3
CC_OL_004_F14	-0.125286		0.0447169		0.14115		-0.0569795		-0.00578975	26.944		3
CC_OL_004_G14	-0.192012		0.293258		-0.0778684		-0.390605	29.421	0.0324473	26.944		3
CC_OL_004_H03	-0.053922		0.0856161		0.0920674	46.6521	-0.159285	32.6536	-0.131396	29.9152		3
CC_OL_004_H04	0.085046		0.128013		0.165831	38.1234	0.0504956	29.421	0.0948809	9.03094		3
CC_OL_004_H07	-0.243392	49.1692	-0.0897169		-0.000994947		0.0390742	22.6047	0.038396	20.224	21.572	3
CC_OL_004_H21	0.0706023	49.1692	0.0586871		-0.183997		-0.0462174	47.8871	-0.155031	25.5212		3
CC_OL_004_I03	0.0502932		0.177237		0.0346526		0.0272955	46.0931	0.196033	9.03094		3
CC_OL_004_K03	0.311782		-0.154103		-0.212867		-0.0342663	44.7282	0.279307	9.03094		3
CC_OL_004_K10	0.0147704		-0.282124		-0.130475		-0.11826	46.0931	-0.0113919	26.944		3
CC_OL_004_K19	0.266957	31.7794	0.20358		0.078658	31.928	0.0592079	22.6047	0.232828	4.15931		3
CC_OL_004_N02	0.181138		-0.0999011		-0.0955176		0.107509	35.5353	0.239347	26.944		3
CC_OL_004_N08	-0.0451701		0.109289		0.164607	31.928	0.444828	0.423656	0.339823	3.5488	14.3112	3
CC_OL_004_P05	0.342037	31.7794	0.736391		0.515969	38.1234	0.136874	9.83518	0.209224	20.224		3
CC_OL_005_A14	-0.120768		0.38093		-0.309739	31.928	0.552936	7.50597	0.433776	3.10331	29.4675	3
CC_OL_005_B06	0.297961	28.3192	0.154568		-0.0508145		0.10358	16.9281	0.140483	9.03094		3
CC_OL_005_B23	0.093779		0.5181		-0.129892		-0.198928	46.7771	0.0722531	20.224		3
CC_OL_005_C18	0.408718	45.4405	-0.0973595		-0.125774		-0.0912747	47.8871	-0.0785389	26.944		3
CC_OL_005_C22	0.0692904		0.151863		0.00292473		0.119473	9.83518	-0.177514	36.305		3
CC_OL_005_F04	0.534715	41.8869	0.294681		-0.0349637		0.327329	16.9281	0.427055	2.75107		3
CC_OL_005_K04	0.0477693		0.163983		-0.449306	12.334	-0.152919	49.5597	0.128429	20.224		3
CC_OL_005_K08	0.170786		0.303962		0.0462332	38.1234	0.139325	9.83518	0.0386594	20.224		3
CC_OL_005_M09	1.5057	0	0.743884		0.30465		0.306877	9.83518				3
CC_OL_005_N07	-0.208597						0.160841	9.83518	-0.0078626	29.9152		3
CC_OL_005_O22	0.406174		-0.0655103		0.0519109	31.928	0.121047	13.6888	0.397736	6.35742		3
CC_OL_005_O24	-0.105499		0.0229163		0.11946	38.1234	-0.064302		0.233154	9.03094		3
CC_OL_006_B03	0.143248		-0.0103483		-0.157814		0.0772974	29.421	-0.174539	29.9152		3
CC_OL_006_B06	0.383525	22.8534	0.0373676		0.120906	31.928	0.343013	4.8009	0.155471	6.35742		3
CC_OL_006_B17	0.489578		0.501769		0.0261325	46.6521	0.0843867	29.421	0.229938	9.03094		3
CC_OL_006_D06	0.0962246						-0.0420639	49.3629				3
CC_OL_006_D22	0.0105332		0.34055		0.00897188		0.0649264	22.6047	0.0332051	9.03094		3
CC_OL_006_D23	0.0775912		-0.346288	38.9184	-0.154068		-0.192885					3
CC_OL_006_F11	-0.163118		0.514611		-0.0621148	43.057	-0.0985451	46.0931	0.188281	6.35742	43.6613	3
CC_OL_006_I23	0.185488		-0.0399919		0.188338	31.928	0.388096	13.6888	0.153075	36.305		3
CC_OL_006_J06	0.6933	19.5692	0.214709		0.493644	31.928	0.39978	9.83518	0.663415	1.1548		3
CC_OL_006_L04	0.207251	49.1692	0.229532		-0.188681		-0.0411233	49.3629	0.133248	20.224		3
CC_OL_006_L18	0.0912415		0.218033		0.112098	31.928	-0.14361		-0.169631	28.5389		3
CC_OL_006_L22	0.068554		0.0346493		-0.0520218		0.140444	16.9281	0.190821	4.15931		3
CC_OL_006_N03	0.130013	35.6136	0.128652		0.22388	31.928			0.0911344	26.944		3
CC_OL_007_A04	-0.0248485		-0.00018454		0.126008	15.759	-0.257754	46.0931	0.0423773	20.224	34.6406	3
CC_OL_007_A15	0.359539	49.1692	0.572485		0.0246827	43.057	0.156673	29.421	0.275995	20.224		3
CC_OL_007_B03	-0.247463										41.5181	3
CC_OL_007_F09	0.25512		0.118027		0.237937	31.928	0.11499	29.421	0.0416414	20.224		3
CC_OL_007_F23	0.0734907		0.0976422		-0.0964011		-0.292079	46.7771	0.0306378	22.8514		3
CC_OL_007_H06	0.159824	35.6136	0.249534		-0.0496876		0.0403195	38.4179	0.304309	20.224		3
CC_OL_007_H24	0.182722		-0.125924		0.0249599		0.161568	22.6047	0.24642	6.35742	47.8336	3
CC_OL_007_I07	0.161991		0.0971067		-0.0152454		0.127984	22.6047	0.105137	20.224		3
CC_OL_007_L10	0.10592		-0.292958	38.9184	0.0623624	38.1234	0.154628	9.83518	0.15848	9.03094	47.8336	3
CC_OL_007_L23	-0.0133025		-0.00527845		-0.120599		0.0234325	46.0931	0.225554	20.224		3
CC_OL_007_M04	-0.285152		0.154216		0.100907	43.057	0.181847	22.6047	-0.0555093	35.1573	27.7537	3
CC_OL_007_N07	0.320664	22.8534	0.271196		0.0508504	38.1234	0.304033	6.05121	0.104225	26.944		3
CC_OL_007_P04	0.0386717		0.0608105		-0.142415		0.108187	16.9281	-0.25898	27.0897		3
CC_OL_008_D08	-0.506339		0.201027		-0.061973		-0.0609974		0.0392576	33.9669		3
CC_OL_008_D18	0.0258444		0.361499		0.000258581		0.0717462	13.6888	-0.0309029	26.944		3
CC_OL_008_G01	0.098278		0.28355		-0.163973		-0.157269		0.0570788	26.944		3
CC_OL_008_I19	0.287853	35.6136	0.384785		0.194154	46.6521	-0.130959	13.6888	0.303428	4.15931		3
CC_OL_008_K05	0.0332866		-0.0741077		-0.0717888		-0.172257		0.151691	20.224		3
CC_OL_008_M24	0.204347	41.8869			0.527893	31.928	0.283304	46.0931	0.0550772	20.224		3
CC_OL_008_P05	0.369851	35.6136	0.0762647		0.181269		0.223047	9.83518				3
CC_OL_009_B21	0.111756				-0.169925		0.214172	9.83518	-0.100118	22.8514		3
CC_OL_009_C18	0.193113		0.0719212		-0.134028		0.0425078	49.3629	0.0640877	22.8514		3
CC_OL_009_D16	0.163769		0.174756		0.09072	46.6521	0.0814975	16.9281	0.114941	26.944		3
CC_OL_009_E18	-0.189704		1.33831		-0.12907		0.292353	9.83518	0.111686	20.224		3
CC_OL_009_F15	0.590071	16.5889	0.510166		0.577239	6.14359	0.744131	7.50597	0.913778	4.15931		3
CC_OL_009_F17	0.1657		0.459743		0.164618	31.928	0.0953174	22.6047	-0.0421691	34.9462		3
CC_OL_009_F20	1.51904	0	2.31368	4.01477	1.60543	0	1.26019	2.49879	1.17161	2.02696		3
CC_OL_009_G10	0.156271		-0.172044		0.163901		0.11706	22.6047	0.237367	7.5619	45.3265	3
CC_OL_009_J19	0.192316		0.122662		-0.145097		0.00984638	13.6888	0.119746	20.224		3
CC_OL_009_K21	0.131099		0.369336		0.208014		0.231236	7.50597	0.214563	20.224		3
CC_OL_009_N02	-0.00763769		0.311255		0.0819185	38.1234	0.340021	29.421	0.016793	26.944		3
CC_OL_009_N24	1.08429	0	0.616517		0.706361	4.7587	0.406355	9.83518	1.21257	2.75107		3
CC_OL_009_P18	-0.0428024		-0.020971		-0.123815		0.184492	16.9281	0.333872	5.47181	31.3939	3
CC_OL_010_E10	0.306489		0.0318179		0.0678814		-0.100963	46.7771	0.138692	20.224		3
CC_OL_010_G13	0.243276	31.7794	0.225925		0.135271	31.928	0.176384	16.9281	-0.0942114	36.305		3
CC_OL_010_H03	0.0730577		0.0309267		-0.0583011		-0.394092	46.4495	-0.14004	28.5389		3
CC_OL_010_H13	-0.0757029		-0.318364		-0.209747							3
CC_OL_010_I08	0.115064		0.162386		0.21225	31.928	-0.0999291	35.5353	-0.0210129	36.305		3
CC_OL_010_I09	0.665471	19.5692	0.0262912		0.0995792	31.928	0.154926	16.9281	-0.00502873	26.944		3
CC_OL_010_I20	0.175852		-0.115752		-0.0724294		0.25234	13.6888	-1.57577	25.5212	18.9075	3
CC_OL_010_I22	0.438248	35.6136	-0.147001		-0.0336105		-0.409988	0.826129	-0.0918661	29.9152	23.4266	3
CC_OL_010_J06	-0.324318		0.40473		0.254926	31.928			0.414427	4.15931		3
CC_OL_010_O06	0.07982		0.0233907		-0.177734		-0.172853		0.18397	20.224		3
CC_OL_010_O15	0.171818	45.4405	0.165232		0.0207899	38.1234	-0.00483559		0.319707	9.03094		3
CC_OL_010_P05	0.07263		0.413533		0.068039	38.1234	0.11828	16.9281	0.17353	20.224		3
CC_OL_011_D01	0.0620659		0.201229		0.023437	31.928	-0.143933	47.8871	0.0139944	33.9669		3
CC_OL_011_D10	0.295431		0.0769914		0.0936849		-0.034972	49.5597	0.442817	2.75107		3
CC_OL_011_E24	0.122189		-0.0368839		0.144205	31.928	-0.164222	32.6536	0.393747	9.03094		3
CC_OL_011_F19	0.199638		0.13877		0.0279476		-0.137696	29.421	0.103462	7.5619		3
CC_OL_011_G08	0.20855		0.15215		0.130967	31.928	0.0649733	22.6047	0.113204	20.224		3
CC_OL_011_H08	-0.0322842		0.0881924		0.0992267	43.057	0.435345	1.29953	0.0899599	20.224		3
CC_OL_011_H18	-0.347769		0.717658	18.5297	-0.215616		0.182194	22.6047				3
CC_OL_011_I24	-0.0425124		-0.268152		0.133867	38.1234	-0.0816151	49.5597	0.177576	26.944		3
CC_OL_011_J10	0.205704	49.1692	0.456458		0.20827	38.1234	0.240419	9.83518	0.233502	20.224		3
CC_OL_011_N05	0.0238473		0.045527	38.9184	-0.294997	9.9843	-0.183241	16.9281	-0.0908602	33.4832		3
CC_OL_011_N13	0.588392	5.92376	1.04085	32.5973	-0.512979		0.0996208	29.421	-0.041602	28.5389	23.4266	3
CC_OL_012_E19	0.304849	35.6136	-0.0491958		0.22909	31.928	0.0639244	29.421	0.0121761	36.305		3
CC_OL_012_F06	0.955616	0	0.446291		0.672429	15.759	0.595864	4.8009	0.272185	9.03094		3
CC_OL_012_G12	-0.0403515		0.186528		-0.0623662	46.6521	0.237212	9.83518	-0.193148	30.7229		3
CC_OL_012_I02	0.16719	49.1692	0.0315113		-0.15699		0.0057133	38.4179	0.0965234	25.5212		3
CC_OL_012_J11	0.122183		-0.223389	38.9184	0.242387	31.928	0.0514895	29.421	-0.271621	27.0897		3
CC_OL_012_O09	0.0737037		-0.143962		0.062651	38.1234	-0.0840351	46.7771	0.223833	9.03094		3
CC_OL_012_O16	0.211498		0.304901		-0.125624		-0.231063		-0.509251	3.5488	15.748	3
CC_OL_012_P06	0.101583		0.322557		-0.115696		-0.129799	49.3629	0.183465	9.03094		3
CC_OL_013_C08	0.0982345		0.0146639		0.220963	38.1234	-0.462589	0.826129	0.00712326	26.944		3
CC_OL_013_D08	0.387684		0.204626		0.186796		0.0633371	32.6536	0.12424	20.224		3
CC_OL_013_D19	0.0311699		0.0761096		0.00489597		-0.303362	2.49879	-0.348143	30.7229		3
CC_OL_013_F13	0.162965		-0.294372		-0.175761		0.298107	13.6888	-0.0133223	33.9669		3
CC_OL_013_G01	-0.245232		0.292025		-0.072827		-0.172386		-0.366118	29.9152		3
CC_OL_013_G20	-0.180035		0.0296216		-0.0311947		-0.0485477	49.3629	0.0415838	20.224	45.3265	3
CC_OL_013_H07	0.186665		0.14884		-0.121702		-0.110431	44.7282	0.571369	20.224		3
CC_OL_013_H20			0.495879		0.445374	15.759	0.273793	9.83518	0.0903973	20.224		3
CC_OL_013_H24			0.0037157				-0.151022	47.8871				3
CC_OL_013_N18	0.0617911		0.705284	15.1433	1.0828	14.2796	0.467696	13.6888	0.203587	9.03094		3
CC_OL_013_O11	-0.105516		0.141656		0.0825626	38.1234	0.208657	22.6047	0.136285	20.224		3
CC_OL_013_P15	0.0388617		0.346636		0.179484		-0.19481	47.8871	-0.0568093	36.1987		3
CC_OL_013_P22	0.144832	35.6136	0.234268		0.108003	38.1234	-0.267727	6.05121	0.1431	36.305		3
CC_OL_014_B04	0.0374677		-0.246932		-0.208094				0.22991	22.8514		3
CC_OL_014_B21	-0.858222	5.59812	-0.744603		-0.75597	9.9843	0.45114	16.9281	-0.127233	28.5389		3
CC_OL_014_C11	-0.0581783		-0.292548		-0.122669		0.0101595	47.8871	0.198821	20.224		3
CC_OL_014_E15	0.353595	22.8534	0.207309		-0.0831355		0.0789087	22.6047	-0.0326578	32.952		3
CC_OL_014_G20	-0.0329842		0.274049		-0.0279454		0.0772801	22.6047	0.0909495	20.224		3
CC_OL_014_H14	0.19813	49.1692	0.190709		-0.074317		-0.0377925		0.0628211	36.305		3
CC_OL_014_K23	0.107545		-0.115855		-0.0413046		0.399386	13.6888	0.341184	6.35742	47.8336	3
CC_OL_014_P04	0.257094		0.377096		0.0202907		-0.0387052	32.6536	-0.131701	33.4832		3
CC_OL_015_B08	0.113163		-0.0213378		-0.0859006		-0.0108905	49.5597	0.246041	20.224		3
CC_OL_015_B17	1.00421	9.29258	0.282214		0.0649206	31.928	-0.0264128	49.3629	0.478406	9.03094		3
CC_OL_015_F19	0.0794902		0.0246356		-0.486415	4.7587	0.0675772	9.83518	-0.173451	32.346		3
CC_OL_015_G17	-0.0177798		0.057481		0.059546	43.057	0.00527753	29.421	-0.15285	28.5389		3
CC_OL_015_H13	0.617739	45.4405			0.251393	38.1234	0.377655	16.9281	0.424565	4.15931		3
CC_OL_015_I09	0.187944	49.1692	-0.0670535		0.160894	38.1234	-0.234176	16.9281	0.232258	22.8514		3
CC_OL_015_I14	0.310641	35.6136	-0.078096		-0.268035		0.12935	46.0931	-0.00278233	26.944		3
CC_OL_015_I21	0.446909		0.168976		0.27103	43.057	-0.0369888	29.421	0.684236	7.5619		3
CC_OL_015_M08	0.0740083		-0.0259982		0.0779259	38.1234	0.163637	40.8976	0.226907	9.03094		3
CC_OL_015_N18	0.0878047		0.266496		-0.278866		-0.0101601	38.4179	-0.210283	36.1645		3
CC_OL_015_P13	-0.04789		0.013784		0.239297	31.928	-0.0996361	9.83518				3
CC_OL_016_A11	-0.0765615	49.1692	-0.154281		0.193189	38.1234	0.371452	7.50597	0.217713	20.224		3
CC_OL_016_D20	0.394362	35.6136	-0.0260751		0.269264		0.326453	3.66522	0.557057	6.35742		3
CC_OL_016_G06	-0.0196234		-0.269022	38.9184	-0.18129	46.6521	-0.174033	49.3629	0.110157	36.305	29.4675	3
CC_OL_016_H03	0.405893	19.5692	-0.0431334		0.292001	38.1234	0.362185	4.8009	-0.0493701	20.224		3
CC_OL_016_J06	-0.1667	21.354	0.0246403		-0.397092	9.9843	0.356126	9.83518	0.121279	20.224	37.9165	3
CC_OL_016_M08	0.302139		0.137178				0.118484	13.6888	0.176725	25.5212		3
CC_OL_016_N19	0.0869432		-0.556453	14.679	-0.00734782		-0.526604	0.470155	0.171923	36.305		3
CC_OL_016_P19	-0.207461		0.161858		-0.275714	46.6521	0.0891153	16.9281	-0.00648211	20.224	37.9165	3
CC_OL_017_D18	0.198294		0.129055		-0.113258		-0.0992169		0.255909	7.5619	29.4675	3
CC_OL_017_E12	-0.0426817		0.0826997		0.240843	43.057	-0.488246	0.584132	0.0621195	36.305		3
CC_OL_017_G12	0.0470539		-0.0620214		0.0101278		0.0946294	29.421	-0.11209	27.0897		3
CC_OL_017_G18	0.296649	25.6173	0.0554978		0.212377	31.928	0.227448	22.6047	0.358075	9.03094		3
CC_OL_017_G20	0.220552		0.59522	38.9184	-0.080059	43.057	-0.153356	46.0931	-0.105718	32.346		3
CC_OL_017_G21	0.174558	35.6136	0.179361		-0.00434838	46.6521	0.287718	7.50597	0.040028	26.944		3
CC_OL_017_J04	-0.0151406		0.140474		0.059305	31.928	0.292592	16.9281	-0.0491173	36.305		3
CC_OL_017_K03	0.0644436		0.109904		-0.160092		-0.123123	46.7771	0.377172	26.944		3
CC_OL_017_K24	-0.233358		-0.104014		0.052189		-0.253892	49.3629	0.166562	20.224	45.3265	3
CC_OL_017_L02	0.133911		0.0121368		0.0788614	31.928	0.458077	6.05121	0.5376	1.85298	41.5181	3
CC_OL_017_L16	-0.134075		-0.304947				0.0337816	22.6047	-0.0638624	26.944		3
CC_OL_017_N09	-0.0898727		0.0504794	38.9184	-0.189064		0.160462	29.421	-0.0675372	36.305		3
CC_OL_017_P04	0.0721668		0.196275		0.0935136		-0.183889	47.8871	0.0263891	32.952		3
CC_OL_017_P07	0.205998		0.284812		0.439067	15.759	0.326949	7.50597	0.190902	9.03094		3
CC_OL_018_A09	-0.0165961		0.372253		-0.0884441		-0.0273866	29.421	0.152044	20.224		3
CC_OL_018_F08	-0.0328728		0.531313		0.062155		-0.128282	47.8871	-0.078875	36.305		3
CC_OL_018_F19	0.0718783		-0.0450399	38.9184	0.0253478	43.057	-0.0508218		0.132882	9.03094		3
CC_OL_018_I09	0.210694		0.364287		-0.0933217				0.269682	9.03094		3
CC_OL_018_J12	-0.0290804				-0.27677							3
CC_OL_018_J22	0.342337	28.3192	-0.264232		0.324547	15.759	0.121982	16.9281	0.177952	20.224		3
CC_OL_018_M09	0.227777		0.175894		-0.314302		0.00985835	29.421	0.0730442	26.944		3
CC_OL_018_N08	-0.0592999		0.199397		0.0394828		0.00397426	22.6047	0.272206	20.224	29.4675	3
CC_OL_018_N23	0.145217		0.11845		0.298862	15.759	-0.231469	16.9281	-0.103347	32.346		3
CC_OL_018_O12	0.327215				0.100114		-0.25359	47.8871	0.26663	6.35742		3
CC_OL_019_A05	-0.0904328		-0.146215		-0.141413	43.057	-0.171194	32.6536	-0.335534	27.0897		3
CC_OL_019_A14	0.350965	31.7794	-0.185596		-0.108321		-0.232731		-0.0816004	29.9152		3
CC_OL_019_B01	-0.172125		-0.42071	38.9184	0.0185865		-0.167111	35.5353	0.245582	9.03094	27.7537	3
CC_OL_019_B17			-0.315831	38.9184								3
CC_OL_019_B18	0.0467346		-0.00494626		0.0824315		-0.250889	46.4495	0.0691876	26.944	34.6406	3
CC_OL_019_B20	-0.162314		0.0252545		-0.0989383		-0.0677013	46.0931	0.02018	26.944	49.6822	3
CC_OL_019_F12	0.123518	49.1692	0.233312		-0.217191		-0.156048		-0.201809	26.944		3
CC_OL_019_G07	0.167682		0.454324		0.108771	31.928	0.0874351	22.6047	-0.0510341	20.224		3
CC_OL_019_I04	0.114817		-0.0219906		-0.0331691		-0.369047	40.8976	0.372306	4.15931	47.8336	3
CC_OL_019_K24	0.115914		-0.0762847		0.114782	38.1234	0.107771	32.6536	0.00838652	36.305		3
CC_OL_019_L01	-0.599265	5.92376	-0.490997	32.5973	-0.164296		-0.0607682		0.0532222	9.03094	10.5994	3
CC_OL_019_L06	0.0297044		-0.216337		-0.0218878	46.6521	0.0909338	22.6047	0.0468277	9.03094		3
CC_OL_019_L07	0.200408	49.1692	-0.159662		0.193426	46.6521	0.0163816	46.0931	-0.0082505	36.305		3
CC_OL_019_P05	-0.218534		0.0464928		-0.164501		-0.112384	49.5597	-0.0772989	36.305		3
CC_OL_020_A12	-0.0327833		-0.150601		0.159735	38.1234	0.0184378		0.232416	3.5488		3
CC_OL_020_A16	-0.118093		-0.0202548		0.273788	15.759	-0.232156	42.9187	-0.157579	29.9152		3
CC_OL_020_A24	0.240178		0.00525573		-0.00280417		-0.0629662		0.0643207	25.5212		3
CC_OL_020_B15	0.16736		0.0738618		-0.128419		0.301132	13.6888	0.275098	5.00268		3
CC_OL_020_C03	-0.163656		0.0617874		0.106737	38.1234	0.0772637	22.6047	-0.0414141	25.5212	37.9165	3
CC_OL_020_C24	-0.079872		-0.123201		-0.171936		0.155774	29.421	0.294081	9.03094		3
CC_OL_020_D02	-0.198917		0.0179829		-0.242641		-0.12776	38.4179	-0.188059	27.0897		3
CC_OL_020_D10	0.00810919		-0.209604		-0.0335253		0.13772	22.6047	-0.153531	31.5418		3
CC_OL_020_E01	0.109434		-0.572175	38.9184	0.15519	38.1234	0.0683528	32.6536	0.134822	9.03094	40.1778	3
CC_OL_020_E02	0.171927		-0.353712		0.0317839		0.0942319	9.83518	0.31321	20.224	40.1778	3
CC_OL_020_E04	0.0153847		0.0310477		-0.0161947		-0.032465		0.300897	9.03094		3
CC_OL_020_E07	0.330327	28.3192	0.048842		-0.143458		-0.00789852	29.421	0.297018	5.47181		3
CC_OL_020_G04	0.786684	25.6173	0.47145		1.08296	1.44109	0.463483	2.49879	0.535187	4.15931		3
CC_OL_020_J06	-0.195697		-0.108853		-0.133665		-0.276803	46.7771	0.249074	9.03094	14.3112	3
CC_OL_020_J10	0.133548		-0.121918		0.131715	46.6521	0.0699815	22.6047	0.045107	22.8514		3
CC_OL_020_J15	-0.105943		-0.0410978		-0.0253411		0.0770451	32.6536	0.358239	9.03094	27.7537	3
CC_OL_020_K02	-0.331782	49.1692	-0.116854		0.133745	38.1234	-0.163291	35.5353	0.184585	34.6792	43.6613	3
CC_OL_020_K06	0.236279	49.1692	-0.0244666		-0.111714		0.216041	22.6047	0.112487	22.8514		3
CC_OL_020_P21	-0.171693		-0.210119	38.9184	0.0907045	38.1234	-0.0153165	29.421	0.112321	26.944	36.3277	3
CC_OL_021_C06	-0.0974772		0.137815		-0.0874915		0.13849	16.9281	-0.192501	32.346		3
CC_OL_021_C16	0.27948		-0.15522		-0.182296				-0.378958	29.2273		3
CC_OL_021_D11	-0.0232833				-0.098309		0.0629628	22.6047	0.144195	20.224		3
CC_OL_021_I11	0.191383	45.4405	0.173663		0.112921	46.6521	-0.125236	46.4495	0.369352	9.03094		3
CC_OL_021_L20	0.25543		-0.0310195		-0.0545481							3
CC_OL_021_M21	-0.0507418		0.0754531		0.0697236		-0.0120049		0.11281	26.944		3
CC_OL_021_N15	0.202203		0.199903		-0.199384		0.442123	9.83518	1.026	2.36043	31.3939	3
CC_OL_021_O12	0.243998	45.4405	0.145262		0.052355	38.1234	-0.0974176	38.4179	0.349605	5.00268		3
CC_OL_022_A15	-0.00640441		0.185799		0.0164191		-0.121488	46.4495	-0.197711	30.7229		3
CC_OL_022_D09	0.1537		0.10102		-0.0771014		-0.238099	3.20256	0.0122694	20.224		3
CC_OL_022_F04	-0.00126539		-0.126571		-0.0201311				0.0364786	22.8514		3
CC_OL_022_G12	0.269826	31.7794	-0.0673372		0.209802	31.928	-0.0857466	47.8871	-0.0145824	36.305		3
CC_OL_022_G13	-0.0265116		0.147378		-0.0654436		0.0377775	42.9187	0.223451	22.8514		3
CC_OL_022_G23	-0.00803754		0.0248171		-0.0691758		-0.0889119		-0.155294	27.0897		3
CC_OL_022_I13	0.113575		-0.100182		-0.269486		0.305341	16.9281	0.383081	9.03094		3
CC_OL_022_I22	0.182237	45.4405	0.116403		-0.610238	4.7587	-0.409508	0.584132	0.0952295	20.224		3
CC_OL_022_K03	0.182252		0.14857		-0.103817		-0.192967	13.6888	-0.0556376	32.346		3
CC_OL_022_L06	0.16646	49.1692	-0.0839723		-0.0929349		0.10571	22.6047	0.172359	5.47181		3
CC_OL_022_L23	-0.131446		0.195582		-0.0955702	46.6521	-0.114271		-0.266866	30.7229		3
CC_OL_022_N02	0.424983	41.8869	0.11757		-0.0272229	46.6521	-0.141425	32.6536	-0.0811816	26.944		3
CC_OL_022_N14	-0.000214805		0.0866662		0.202315	31.928	-0.0947971	29.421	-0.0238186	22.8514		3
CC_OL_022_P07	0.523926	25.6173	0.443851		0.0202674	43.057	-0.225451	35.5353	0.0984198	20.224		3
CC_OL_022_P23	0.161637		-0.223708		0.0830934		0.160572	22.6047	0.343409	9.03094	23.4266	3
CC_OL_023_A16	-0.198735		0.083757		0.0838963		0.115602	22.6047	0.0291388	26.944		3
CC_OL_023_B13	0.0295707		-0.370855	30.5514	0.0390056	43.057	0.416723	9.83518	0.201508	20.224	19.7688	3
CC_OL_023_C12	-0.0933268		-0.0355141		0.00891033		-0.128406	13.6888	0.284039	4.15931	40.1778	3
CC_OL_023_D05	0.167972		-0.0282762		-0.100245		0.241116	9.83518	-0.193893	36.305		3
CC_OL_023_H18	0.141611		0.219847		-0.205294		-0.0975156		0.0215989	26.944		3
CC_OL_023_J02	0.281024	25.6173	0.263366		-0.0740136		0.483402	13.6888	-0.275533	27.9187		3
CC_OL_023_K08	-0.260412		-0.397427		-0.409493	9.9843	-0.160398		0.213865	4.15931	29.4675	3
CC_OL_023_K19	-0.00261302		0.216797		-0.0987722		-0.182106	6.05121	0.176582	9.03094	41.5181	3
CC_OL_023_K24	0.415509	21.354	-0.220125		-0.184419		0.112958	35.5353	0.421534	20.224		3
CC_OL_023_L14	0.275938	28.3192	0.336918		0.0727711	46.6521	-0.0575297		0.320821	9.03094		3
CC_OL_023_L21	-0.0872713		-0.279073	38.9184	-0.0365665		0.0256676	46.0931	0.177293	5.47181	18.5261	3
CC_OL_023_N01	0.515643	35.6136	-0.432059		0.0247097		0.107502	22.6047	0.148247	26.944		3
CC_OL_023_N02	0.296092		0.291493		0.119484	31.928	-0.101944	46.0931	0.128366	9.03094		3
CC_OL_023_O03	0.129292		-0.0572838		-0.0967323		0.13044	13.6888	-0.00264109	25.5212		3
CC_OL_023_O06	0.28457	21.354	0.293072		0.00935726		-0.0298961	42.9187	-0.219381	33.9669	17.2576	3
CC_OL_023_P02	0.436361		0.0195262		0.0586447		0.044692	38.4179	0.33991	9.03094		3
CC_OL_024_B17	0.380247	13.7761	-0.178426		-0.0601323		-0.161456		0.099106	26.944		3
CC_OL_024_B18	0.357188	22.8534	0.248448		0.0232991		-0.968816	0	-0.577582	26.944	17.2576	3
CC_OL_024_C22	0.0467553		0.0541774		-0.0287157		0.0469197	22.6047	0.0315573	33.9669		3
CC_OL_024_F04	0.12023		0.181888		0.0651502	38.1234	0.421001	7.50597	0.0903111	20.224		3
CC_OL_024_F06	0.147632		0.270744		0.503502	14.2796	0.295578	16.9281	0.648917	5.00268	47.8336	3
CC_OL_024_I23	-0.172722		0.181125		0.205605	31.928	-0.387292	6.05121	0.437159	3.5488		3
CC_OL_024_J02	0.298204	49.1692	0.238154		0.14591		9.36745e-05	42.9187	0.205145	9.03094		3
CC_OL_024_O17	0.203907		-0.207078	38.9184	0.291892	31.928	0.046651	35.5353	-0.133612	22.8514		3
CC_OL_024_O24	0.0265722		0.326045		0.351511	31.928	-0.215012	29.421	0.0347916	33.4832		3
CC_OL_024_P24	0.110077		0.219039		-0.0239072		-0.0810316	49.3629	-0.0271375	26.944		3
CC_OL_025_C09	-0.214512		0.29801		0.124333	38.1234	0.232046	7.50597	0.377844	20.224	37.9165	3
CC_OL_025_D23	0.1809	25.6173	-0.363643		-0.045395		0.0201149	42.9187	0.399157	3.5488		3
CC_OL_025_E09	0.0890898		-0.0159143		0.112901	43.057	0.159327	7.50597	0.107305	20.224		3
CC_OL_025_F18	0.0627378		0.0292429		-0.352192	4.7587	-0.292139	0.735115	-0.0134338	32.952		3
CC_OL_025_G15	0.0936828		0.196249		-0.0716443		-0.0384089	42.9187	0.113871	20.224		3
CC_OL_025_I02	0.243636	35.6136	0.0691728		-0.317942		0.0632786	32.6536	0.0609988	25.5212		3
CC_OL_025_J16	0.0856027		-0.00507001		-0.0445694		0.322556	9.83518	-0.343468	30.7229		3
CC_OL_025_J18	-0.35894	41.8869	0.319274		0.0844689		-0.125016	49.5597	-0.104498	34.9462		3
CC_OL_025_K18	0.344273		0.0698217		0.00176972		0.174978	22.6047	-0.0602845	32.952		3
CC_OL_025_K20	0.0446436		0.0210135		-0.0982324		0.146437	46.0931	0.0764276	35.1573		3
CC_OL_025_M12	0.030314		0.054147		0.171977	38.1234	0.0884675	29.421	0.0330898	20.224		3
CC_OL_025_N04	-0.0770518		0.126308		0.0598355		-0.279692	47.8871	0.154472	7.5619		3
CC_OL_025_P03	-0.0917603		0.100304		-0.12028		-0.480493	13.6888	0.0314437	9.03094		3
CC_OL_025_P06	0.265206		-0.208271		-0.124989		0.120843	13.6888	0.0405928	26.944		3
CC_OL_026_A08	-0.0298766		0.0506377		0.0278267		-0.206841	44.7282	-0.0306584	36.305		3
CC_OL_026_A24	0.491121	15.574	0.661422		0.314882	31.928	0.0536167		0.0415555	25.5212		3
CC_OL_026_B21	-0.200497		-0.147143		-0.14276		-0.291751	2.49879	0.0304146	26.944	45.3265	3
CC_OL_026_B23	-0.166318		-0.029577		-0.0897463		-0.0981584	46.0931	0.102119	20.224		3
CC_OL_026_D11	0.415237	45.4405	-0.297637		-0.0340726		-0.517111	4.8009	-0.440291	27.0897	7.67593	3
CC_OL_026_G05	-0.0608845		-0.151815		0.141207	31.928	-0.242602		0.175764	20.224		3
CC_OL_026_I05	0.0395013		0.0301297		-0.16606				0.110875	34.6792		3
CC_OL_026_J20	0.339797		0.143351		0.0970212	38.1234	-0.164761	49.3629	0.25805	9.03094		3
CC_OL_026_N20	0.0827696		-0.133575		-0.0176589		0.00619258		0.0135989	22.8514		3
CC_OL_026_O04	0.0933839	41.8869	-0.149275		0.11027		0.116196	32.6536	0.0325035	20.224		3
CC_OL_026_P22	0.0989591		0.161052		0.211947	31.928	0.101805	9.83518				3
CC_OL_027_B19	0.040705		-0.278772	38.9184	-0.303618	15.759	0.0493828	13.6888	0.500207	3.5488	40.1778	3
CC_OL_027_C23	-0.0960473		-0.323545		-0.141077		-0.0479017	49.5597	0.0971414	20.224	14.3112	3
CC_OL_027_D04	-0.0449799		0.19598		-0.0980301		-0.245436		-0.213906	25.5212		3
CC_OL_027_F16	0.31912	45.4405	0.817123		0.21942	31.928	0.193872	7.50597	0.0525688	25.5212		3
CC_OL_027_I06	0.300385	22.8534	-0.00288049		0.243555	15.759	0.554193	3.20256	-0.00461693	26.944		3
CC_OL_027_I24	-0.22694		-0.0174989				0.283312	7.50597	0.654934	20.224	12.7645	3
CC_OL_027_J18	0.195156		0.301086		-0.290562		-0.158642	7.50597	0.251518	9.03094		3
CC_OL_027_L02	-0.0762888		0.0317606		-0.195132		-0.0374378	35.5353	0.00368604	32.346		3
CC_OL_027_L04	0.2835		0.00559618		-0.126139		-0.00499348	29.421	-0.137464	27.0897		3
CC_OL_027_L05	-0.121403		0.0271215		0.452949	38.1234	0.143806	29.421	0.254866	9.03094	47.8336	3
CC_OL_027_N15	0.233691		0.0614122		0.234142	15.759	0.0324471	22.6047	0.232603	9.03094	45.3265	3
CC_OL_027_N24	0.112571		0.0933375		0.180474	31.928	0.397923	22.6047	0.685191	9.03094	45.3265	3
CC_OL_027_O01	0.420014	28.3192	0.0580048		0.0526085	31.928	-0.657028	13.6888	-0.45147	29.9152		3
CC_OL_027_O11	0.273303	49.1692	0.0593496		0.0223094	38.1234	-0.0815127	49.3629	0.105175	22.8514		3
CC_OL_027_O13	-0.684542	4.02895	-0.646715	38.9184	-0.691189	6.14359	-0.239445	7.50597			43.6613	3
CC_OL_027_P04	-0.15629		0.0226401		0.0644686		0.0457457	38.4179	0.126684	9.03094	37.9165	3
CC_OL_027_P24	0.316071	28.3192	0.14537		0.0108074	43.057	0.0956376	40.8976	0.0759272	20.224		3
CC_OL_028_C13	0.710455	19.5692	-0.0926439		-0.0789961		0.0984171	22.6047	0.244464	3.5488		3
CC_OL_028_D11	0.0595914		-0.176693		-0.134005		0.102327	32.6536				3
CC_OL_028_E18	0.168388		0.173516		-0.126661		-0.0480601		0.30666	6.35742		3
CC_OL_028_G20	-0.102883		-0.00904172				0.116036	13.6888	0.609288	2.75107		3
CC_OL_028_H09	0.268888	22.8534	0.0563245		0.138804	31.928	-0.111373	46.4495	0.225902	9.03094		3
CC_OL_028_H13	-0.0907082		-0.0462462		-0.191662		-0.0107244	29.421	-0.0806234	26.944		3
CC_OL_028_J03	0.014442		-0.305749		0.0952238	46.6521	0.0187334	44.7282	0.0246821	36.305		3
CC_OL_028_N18	0.173942		-0.018656		0.232754	31.928	0.68405	3.20256	-0.518555	25.5212		3
CC_OL_028_N23	0.133433	35.6136	-0.252826		0.0156349		0.318206	4.8009	0.272748	5.47181	29.4675	3
CC_OL_028_O04	0.146027		-0.188416		0.131257	31.928	0.338532	9.83518	-0.3161	27.0897		3
CC_OL_028_O05	0.0435602		-0.0744602		-0.185294		-0.0696652	46.0931	0.0467399	26.944		3
CC_OL_028_O15	-0.236173		0.237452		-0.0853999		-0.171988					3
CC_OL_028_O16	0.193834		-0.296645	38.9184	-0.0112254		-0.0335615	32.6536	-0.171993	27.0897		3
CC_OL_029_B02	-0.136807		0.266545		-0.0980385		-0.181728	22.6047	0.271065	9.03094		3
CC_OL_029_B09	0.0199164		0.36642		0.149789		0.0960315	32.6536	-0.127094	31.5418		3
CC_OL_029_B22			0.352469		0.20099	31.928	-0.297927	44.7282	0.229127	9.03094		3
CC_OL_029_E19	0.185903		-0.0718029		0.130659		-0.509382	35.5353	-0.150398	29.2273		3
CC_OL_029_F08	0.295809		0.0372707		0.147163	31.928	0.0659801	22.6047	0.248398	9.03094		3
CC_OL_029_F21	0.127994		-0.0787467		0.0444688		0.0306167	22.6047	-0.313324	27.0897		3
CC_OL_029_F23	-0.158509		0.519734		0.102872	38.1234	0.299783	22.6047	-0.45962	25.5212		3
CC_OL_029_F24	0.429232	28.3192	0.37256	25.3071	0.281108	15.759	0.132031	40.8976	0.722918	20.224		3
CC_OL_029_G02	0.161315		-0.215987		-0.0256913		0.457944	0.735115	0.527268	3.5488	47.8336	3
CC_OL_029_G11	0.166292		0.0166044		-0.371382		0.0215805	32.6536	0.399759	20.224	45.3265	3
CC_OL_029_H10	-0.12486		-0.0299764		0.036017		0.017295	22.6047	-0.107963	33.4832		3
CC_OL_029_I14	0.164572		0.316307		-0.0198091		0.0171865	16.9281	0.301231	7.5619		3
CC_OL_029_J06	0.102035		-0.117601		0.10232		-0.187823	38.4179	-0.473416	28.5389	40.1778	3
CC_OL_029_M13	-0.260075		-0.295459		-0.211391		0.676531	4.8009	0.246832	5.47181	21.572	3
CC_OL_029_N17	0.579771	8.21346	0.155902		0.507799	31.928	0.0816008	16.9281	0.281975	3.5488		3
CC_OL_029_P11	0.145086		0.332727		0.0828786	38.1234	0.259156	13.6888	-0.0326045	31.5418		3
CC_OL_030_A09	0.0781472		0.158122		-0.169577		-0.306184	32.6536	-0.0160052	26.944		3
CC_OL_030_C09	-0.163687		-0.113815		-0.138233		-0.371156	2.49879	0.0565653	26.944		3
CC_OL_030_C19	-0.300058	41.8869	-0.392163	38.9184	-0.182096		-0.288973	40.8976	0.015196	26.944	41.5181	3
CC_OL_030_D01	0.188903	49.1692	-0.00407077		0.162772	31.928	-0.146376	29.421	0.279821	9.03094		3
CC_OL_030_D06	0.0610702		0.272446		0.0105755		-0.00759776	46.4495	0.158851	26.944		3
CC_OL_030_D13	0.47696	31.7794	-0.0399103		0.162915	38.1234	0.133978	16.9281	-0.0803499	35.1573		3
CC_OL_030_G05	0.13235		-0.0851198		0.146959	38.1234	-0.267457	46.0931	-0.134786	33.4832		3
CC_OL_030_G22	0.0704793		-0.435472	38.9184	-0.316255		-0.190709	47.8871	-0.173575	34.6792		3
CC_OL_030_J16	0.222255	49.1692	0.145338		-0.182522	46.6521	-0.401604	9.83518	0.206049	20.224		3
CC_OL_030_J17	0.163574		-0.0764662		-0.060684		0.263615	13.6888	0.0706429	20.224	45.3265	3
CC_OL_030_K17	0.148406		0.0715111		0.339933	15.759	0.0139622		-0.0466322	36.305		3
CC_OL_030_L08	0.227942		-0.0516503		0.0706512		-0.0227225		-0.0852949	33.4832		3
CC_OL_030_N11	0.184389		-0.100899		-0.0909698		0.0392456	22.6047	0.0371989	9.03094		3
CC_OL_030_O20	0.473811	9.29258	0.257624		0.149075		0.126352	22.6047	0.260775	20.224		3
CC_OL_031_A06	0.247675		-0.0171434	38.9184	-0.0111886		0.156607	16.9281	0.0500786	20.224		3
CC_OL_031_B19	0.0241717		0.140485		0.269474	43.057	0.133255	32.6536	0.0431375	36.1645		3
CC_OL_031_C17	0.160685		0.310921		-0.0635806		-0.0325712	29.421	0.383606	9.03094		3
CC_OL_031_C22	0.207762	41.8869	0.0280435		0.15274	38.1234	0.190848	13.6888	0.254536	9.03094		3
CC_OL_031_D15	-0.146355		0.0153181		-0.00268915		-0.215123	4.8009	0.335043	20.224		3
CC_OL_031_E05	0.330023	41.8869	0.183221		-0.257197		0.143626	9.83518	0.247649	5.47181		3
CC_OL_031_H16	0.417315	25.6173	0.239543		0.111517	31.928	-0.0591328	49.3629	-0.194964	34.3739	47.8336	3
CC_OL_031_I24	0.0107569		0.0140068		-0.0301172		0.323341	9.83518	0.511145	0	10.1697	3
CC_OL_031_K16	-0.15586		-0.150992		-0.125585		-0.180104	44.7282	0.377119	5.00268	27.7537	3
CC_OL_031_K22	-0.119302		0.0972035		0.0252459		-0.0973563	29.421	0.0753187	20.224	36.3277	3
CC_OL_031_L10	0.127661		0.00354704		0.164911	31.928	0.278318	13.6888	0.264642	3.10331		3
CC_OL_031_O18	0.485353		0.344665		0.208556	38.1234	0.0970737	29.421	-0.00190032	33.4832		3
CC_OL_031_P01	-0.255981		0.0688644		0.244953		0.113613	22.6047				3
CC_OL_031_P08	0.308511	28.3192	0.0916571		0.0613536	46.6521	0.166186	16.9281	-0.26147	9.03094	27.7537	3
CC_OL_032_B02	0.164187				-0.143995		-0.147605		0.122689	26.944		3
CC_OL_032_B17	0.0150295		0.206045		-0.38387		-0.154727	32.6536	0.0124454	35.4545		3
CC_OL_032_C08	0.392006	13.7761	-0.102458		0.11339	38.1234	0.0195022		0.0598435	36.305		3
CC_OL_032_E02	0.143313				0.624246	14.2796						3
CC_OL_032_F03	-0.0902257		-0.067151		0.101741		0.340637	7.50597	0.448832	9.03094	37.9165	3
CC_OL_032_F04	0.0689271		0.355574		-0.0579496	43.057	0.108927	22.6047	0.16818	25.5212		3
CC_OL_032_F08	-0.0943986		0.357334		0.209524		0.226174	7.50597	-0.252361	29.9152		3
CC_OL_032_F15	-0.579104	6.41452	-0.359806	30.5514	-1.07549	0	-0.590254	0.584132	-0.0823942	29.2273	49.6822	3
CC_OL_032_I15	0.225732	45.4405	0.164609		-0.0773122	46.6521	0.0628892	22.6047	0.202765	9.03094		3
CC_OL_032_J15	0.0999175		0.575985		-0.179928				0.184763	20.224		3
CC_OL_032_J18	0.256255	35.6136	0.0420233						-0.143434	32.952		3
CC_OL_032_K23	-0.0113786		0.339761		-0.0874395		0.183458	16.9281	0.207489	9.03094		3
CC_OL_032_L11	0.0253691		-0.137995		-0.0579829		0.261626	7.50597	-0.0374073	32.346	41.5181	3
CC_OL_032_N05	0.112443		-0.0351237		-0.0968501		0.531262	7.50597	0.32702	20.224	47.8336	3
CC_OL_032_P09	0.949146	22.8534	0.664404		0.0563879		0.181307	13.6888	0.190691	9.03094		3
CC_OL_032_P18	0.00696192				-0.185748		-0.142842	32.6536	-0.136286	27.9187		3
CC_OL_033_D02	0.147727	49.1692	-0.157963		0.00532505		-0.274124	7.50597	-0.370792	27.9187	37.9165	3
CC_OL_033_D20	0.25667	31.7794	0.012202		-0.22025		0.0782301		0.0613497	32.952		3
CC_OL_033_G21	0.033523		0.282222		-0.127359		-0.177039	38.4179	-0.292842	28.5389		3
CC_OL_033_H06	-0.15003		-0.423592	38.9184	0.0030252		0.26776	22.6047	0.333025	25.5212	34.6406	3
CC_OL_033_I04	0.449276	45.4405	0.452351		-0.0966524				0.199452	9.03094		3
CC_OL_033_K01	0.391995		0.318924		-0.0211775	38.1234	0.0430561	29.421	-0.140602	30.7229		3
CC_OL_033_K18	0.657988	41.8869	0.766779	32.5973	0.451835	15.759	0.391687	4.8009	-0.0305744	20.224		3
CC_OL_033_M13	0.248191	49.1692	-0.477602	36.199	-0.0855026		0.151094	22.6047	0.0777368	26.944		3
CC_OL_033_N18	0.163709	31.7794	0.257997		-0.0860427		-0.112414	29.421	0.0555682	9.03094		3
CC_OL_033_P21	0.413242	35.6136	-0.0202524		-0.234021		-0.0902397	38.4179	0.0368633	20.224		3
CC_OL_034_A03	-0.0760286		0.357173		-0.125848		-0.00982526	22.6047	0.246857	20.224		3
CC_OL_034_A18	-0.0557021		-0.297938		0.064696		-0.0632051	46.7771	-0.264462	36.305		3
CC_OL_034_C22	-0.0817683		-0.0111897		0.0104359		0.085364	22.6047	0.084108	36.305		3
CC_OL_034_E08	-0.0108525		0.235144		0.248441	31.928	-0.0286913	47.8871	0.238173	26.944		3
CC_OL_034_E19	0.767784	5.13837	0.595672		-0.0117611	31.928	0.754341	6.05121	0.22495	9.03094		3
CC_OL_034_F11	0.0535498		0.134081		-0.251292		-0.168258	38.4179	0.162428	9.03094		3
CC_OL_034_F20	-0.185144		0.258131		0.30631	15.759	0.143821	16.9281	-0.113659	29.9152		3
CC_OL_034_G09	0.195394		0.0555537		-0.0830774	38.1234	-0.154391	38.4179	0.0875051	26.944		3
CC_OL_034_H14	0.471829	28.3192	0.0897411		0.147927	43.057	0.0415588	32.6536	-0.055229	36.305		3
CC_OL_034_I01	0.60651	9.29258	0.510205		0.374168	38.1234	0.518441	35.5353				3
CC_OL_034_I06	-0.0209677		0.098537		0.277614	46.6521	0.226462	13.6888	-0.00932051	20.224	27.7537	3
CC_OL_034_I08	0.00813865		0.0812252		0.131498	31.928	0.114447	22.6047	-0.24687	26.944		3
CC_OL_034_I16	0.116953		0.149766		-0.0388629		-0.299711	35.5353	0.115042	20.224		3
CC_OL_034_I24	-0.141456		-0.406555		0.56396	14.2796	0.554481	7.50597	0.929022	20.224	36.3277	3
CC_OL_035_D22	-0.0722518		0.0491984		0.259451	38.1234	0.090444	46.0931	0.191283	4.15931		3
CC_OL_035_I21	0.386172		0.865676	18.5297	0.320535	31.928	-0.0978032	35.5353	-0.159344	28.5389	19.7688	3
CC_OL_035_M19	0.466539	9.29258	0.254578		0.175744		-0.271892		0.128926	20.224		3
CC_OL_035_O05	0.0101674		-0.0175777		0.166801	38.1234	0.036037	22.6047	-0.00164058	25.5212		3
CC_OL_001_A14	-0.0782857		-0.573312	32.5973	-0.266128		-0.102969		0.0155415	9.03094	37.9165	4
CC_OL_001_C17	-0.162012		0.00613673		-0.165913		-0.180569	46.0931	0.199066	9.03094	37.9165	4
CC_OL_001_D06	0.020904		0.0434005		0.0915832		-0.171737		0.213772	9.03094	47.8336	4
CC_OL_001_D08	-0.326134	11.7111	0.318105		0.089281		-0.0313813	44.7282	0.021381	20.224	27.7537	4
CC_OL_001_E02	0.172062		0.272521		0.182185		-0.15051	44.7282	0.351834	20.224		4
CC_OL_001_E20	-0.294709	15.574	0.113994		-0.221025		-0.326042	0.584132	0.105087	26.944		4
CC_OL_001_F16	-0.209827		-0.215755		-0.165071		-0.172534	46.0931	0.220282	20.224	36.3277	4
CC_OL_001_G15	0.167457		0.147418		0.0119067		-0.0272428	35.5353	-0.144696	36.305		4
CC_OL_001_G22	-0.0162843		-0.151434	38.9184	-0.199053		-0.262962	2.49879	0.103248	26.944		4
CC_OL_001_I13	-0.244612		0.030686		-0.240043		-0.120977		0.0173201	26.944	41.5181	4
CC_OL_001_J21	-0.178784	35.6136	-0.159153		-0.0953918		-0.399549	44.7282	0.415742	1.85298	23.4266	4
CC_OL_001_M24	0.153095	41.8869	0.339312		0.0232073		-0.144921	42.9187	0.318783	3.5488		4
CC_OL_001_O08	0.0116558		-0.0380884		0.255207	31.928	0.0858317	16.9281	0.160211	9.03094		4
CC_OL_001_P01	-0.340253		-0.0698183		-0.152394		-0.172542	13.6888	-0.222034	33.4832	36.3277	4
CC_OL_001_P22	0.0677212	49.1692	-0.0793409		-0.0470976		0.00151968	29.421	0.0461398	9.03094		4
CC_OL_002_C24	-0.00169781		-0.382539	30.5514	-0.0608418		-0.121672	46.0931	-0.337214	30.7229		4
CC_OL_002_D01	0.0138374		0.176459		-0.02857		-0.0676575	49.5597	0.0313285	36.305		4
CC_OL_002_D02	0.112295		0.0683		0.0376202		-0.378713	2.49879	-0.0845416	32.346		4
CC_OL_002_D08	-0.0673548		0.0172943		0.0588115		0.1397	22.6047	0.287803	9.03094		4
CC_OL_002_D13	-0.0240818		-0.0169472		-0.277759		-0.204027	49.3629	0.220312	20.224		4
CC_OL_002_D15	0.0773972		0.206023		0.0307769	46.6521	0.168911	16.9281	0.335165	5.47181	41.5181	4
CC_OL_002_E01	0.27882	41.8869	-0.0166197		0.179833	31.928	0.127814	22.6047	0.00726815	20.224		4
CC_OL_002_E16	0.0714357		0.420952		-0.0811523		-0.397566	3.66522	0.286528	9.03094		4
CC_OL_002_E17	-0.115738		0.0229364		-0.131493		0.0436587	46.0931	0.1127	9.03094	47.8336	4
CC_OL_002_E18	0.120156		-0.085316		0.158497		0.395954	6.05121	0.197504	9.03094	36.3277	4
CC_OL_002_E20	-0.119505		-0.065729		-0.233032		0.00481317	22.6047	-0.0733448	33.9669		4
CC_OL_002_F01	0.120782		-0.05732		-0.256831		0.000581957	29.421	0.092973	20.224		4
CC_OL_002_G06	0.251417	31.7794	0.190141		0.108504	38.1234	0.361981	7.50597	0.214669	9.03094		4
CC_OL_002_H01	-0.298606		-0.148192		-0.393027	31.928	-0.318328	7.50597	0.426631	5.00268	47.8336	4
CC_OL_002_H07	0.109055		-0.0977951		-0.128053		-0.0272216	49.3629	-0.0772761	35.1573		4
CC_OL_002_H14	0.0137829		0.0446112		-0.0406345		-0.0356818		0.269694	4.15931		4
CC_OL_002_H20	-0.127699		0.261341		-0.0101472		0.112012	22.6047	0.0841025	9.03094		4
CC_OL_002_K17	0.203105		0.117045		0.237644	31.928	-0.163204	46.0931	-0.0809862	20.224		4
CC_OL_002_K23	-0.0375555		0.10084		0.137755		-0.165616	40.8976	0.240592	20.224		4
CC_OL_002_N12	0.106529		-0.138507		0.00596916		-0.00412163	46.0931	0.424696	2.02696	36.3277	4
CC_OL_002_N18	-0.0359448		0.442906		0.175414	31.928	0.0170746	22.6047	0.067509	20.224		4
CC_OL_002_N19	-0.0528317		0.052425		0.0123187		-0.130627	44.7282	0.287652	7.5619	43.6613	4
CC_OL_002_O07	-0.148596		-0.260217	38.9184	0.0997701		-0.174684	42.9187	0.358171	6.35742	45.3265	4
CC_OL_002_O20	0.102161	49.1692	-0.0262423		0.202538	38.1234	-0.275907		-0.0277504	26.944		4
CC_OL_002_P01	-0.287169		0.099173		-0.162779		-0.338231	22.6047	0.514362	3.5488		4
CC_OL_002_P12	-0.143285		-0.0414924		-0.34223	31.928	-0.340122	3.66522	0.348609	20.224	41.5181	4
CC_OL_002_P17	-0.012117		-0.0426469		-0.0624156		-0.0724107	46.0931	0.278184	20.224	47.8336	4
CC_OL_002_P18	-0.00327733		-0.0140579		0.10357		-0.0841955	49.3629	0.000582619	22.8514		4
CC_OL_003_B06	-0.159853		0.161229		0.0471578		-0.14437	49.3629	0.336057	9.03094	37.9165	4
CC_OL_003_E19	0.106845		-0.142374		0.0130625		0.441608	7.50597	0.375294	9.03094	37.9165	4
CC_OL_003_F14	-0.126799		0.189753		0.296364	31.928	-0.0356841	46.0931	0.373795	20.224	23.4266	4
CC_OL_003_H02	0.0981333		0.21561		-0.0411644	46.6521	-0.146248	47.8871	0.0907296	20.224		4
CC_OL_003_K01	0.115995		0.273105		0.0192402	43.057	0.152336	9.83518	0.442594	5.00268		4
CC_OL_003_L06	0.185353		-0.238498		-0.0689711		-0.255836	2.49879	0.385566	9.03094		4
CC_OL_003_M04	0.125971		0.53026		0.0279333		-0.0487601	47.8871	0.222113	20.224		4
CC_OL_003_P18	0.0102664		-0.128866		0.0482539		-0.0494404	38.4179	0.172291	7.5619	47.8336	4
CC_OL_004_C15	0.273363	41.8869	0.212386		-0.0124973		-0.402248	0.470155	0.0789148	20.224		4
CC_OL_004_D14	0.063508		-0.156014		-0.0208018	46.6521	0.122665	29.421	0.26545	9.03094	19.7688	4
CC_OL_004_E09	-0.176555		-0.0317599		-0.333016		0.0141896	44.7282	0.214981	9.03094	47.8336	4
CC_OL_004_E22	0.222504	45.4405	0.0444305		0.128635	43.057	0.324593	13.6888	0.381791	5.00268	47.8336	4
CC_OL_004_F07	0.403962	25.6173			0.201904	31.928	-0.0875651	49.5597	0.237254	5.47181		4
CC_OL_004_F18	0.342271		0.28603		0.168954	31.928	-0.0242219	32.6536	-0.248993	27.0897		4
CC_OL_004_F21	0.256847	41.8869	-0.170262		0.106243	43.057	0.435103	4.8009	0.164391	7.5619		4
CC_OL_004_G04	0.619642	22.8534	0.0141057		0.571123	1.44109	0.426216	6.05121	0.260578	6.35742		4
CC_OL_004_G12	0.104183		0.270704		0.147327	38.1234	-0.119928	46.0931	0.406284	3.10331		4
CC_OL_004_G13	0.215088		0.114991		0.169986	46.6521	-0.0814859	40.8976	0.0963322	26.944		4
CC_OL_004_G18	-0.160109		-0.103048		-0.0546789		0.168549	13.6888	0.179267	9.03094	12.7645	4
CC_OL_004_G21	0.0210755		0.0822856		0.137825	31.928	0.32819	6.05121	0.0961912	9.03094		4
CC_OL_004_H23	-0.198536		-0.371478		-0.263258	43.057	-0.219652	46.4495	-0.177359	36.305	36.3277	4
CC_OL_004_H24	-0.211112		0.317103		-0.256432		-0.0303553		0.188883	9.03094		4
CC_OL_004_I05	0.0135335		-0.148367		0.234251	43.057	0.14609	32.6536	0.121871	20.224	49.6822	4
CC_OL_004_I08	-0.0051446		-0.173168		-0.196363		-0.0412413	35.5353	-0.0527799	36.305		4
CC_OL_004_J03	0.233855		-0.060946		-0.0511277		0.122614	29.421	0.314846	9.03094		4
CC_OL_004_J11	0.144581		-0.0729942		0.413837	31.928	-0.0132408		0.334676	3.5488		4
CC_OL_004_J21	0.418262	49.1692	-0.00419656		-0.15387		-0.0870143	32.6536	0.114971	26.944		4
CC_OL_004_K09	0.230808	41.8869	-0.0638099		-0.0905484		-0.215216	7.50597	0.25047	7.5619		4
CC_OL_004_L05	0.219756	49.1692	0.0246155		-0.159144		0.0233025	29.421	0.0135532	20.224		4
CC_OL_004_N09	0.367035	19.5692	0.362782		0.239996	38.1234	0.216976	9.83518	0.463625	5.00268		4
CC_OL_004_N16	0.143947		-0.311821		-0.00613799		0.0102021	32.6536	-0.0418892	28.5389		4
CC_OL_005_B02	0.0626737		0.0976243		0.0243578		-0.0938686		0.000534748	20.224		4
CC_OL_005_B13	0.160071		-0.140931		0.297563	31.928	0.363568	7.50597	0.289025	9.03094	37.9165	4
CC_OL_005_C02	-0.0443875		0.0642262		0.182402	31.928	-0.0295428		0.518662	3.5488		4
CC_OL_005_E03	0.0198667		-0.0776212		-0.188715		0.0242924		-0.0699856	31.5418		4
CC_OL_005_G01	-0.195163		0.337873		-0.0381388		0.0733056	29.421	-0.0141998	9.03094		4
CC_OL_005_H01	-0.0542666		-0.0857743		-0.189232		-0.186677		-0.0274624	33.4832		4
CC_OL_005_H10	0.333107	25.6173	-0.171245		-0.0927992		0.0133299		0.314715	26.944		4
CC_OL_005_I21	-0.158467		-0.239473		-0.0318906		0.34788	3.20256	0.0542407	20.224	21.572	4
CC_OL_005_N10	0.11204		-0.0156745		0.09468	31.928	0.00447443		0.453696	9.03094	45.3265	4
CC_OL_005_O13	-0.0273546		0.243191		-0.146659		0.40956	7.50597	0.112203	20.224		4
CC_OL_006_C06	0.0504439		0.248654		-0.199862		0.0639816	16.9281	0.23266	9.03094		4
CC_OL_006_D14	0.117465		0.0443065		0.108136	46.6521	-0.192574	49.3629	0.009391	20.224		4
CC_OL_006_E08	-0.254323		-0.139265		-0.326715	43.057	-0.0675191	32.6536	0.116331	22.8514	47.8336	4
CC_OL_006_G14	0.191349		-0.246896	38.9184	-0.12855		-0.327031	4.8009	0.0668992	26.944		4
CC_OL_006_H13	-0.0160996		-0.00374576		0.0174383	43.057	-0.115387	49.5597	0.0790522	26.944		4
CC_OL_006_K06	0.276373		0.347429		-0.0287585		-0.44046	1.90836	-0.100355	31.5418		4
CC_OL_006_K19	0.00570667		0.0492206		0.0945296		-0.133368		0.182065	20.224		4
CC_OL_006_N24	0.0717901		0.311977		-0.249801		0.386356	29.421	0.371272	2.36043		4
CC_OL_007_B13	0.263012		0.317067		-0.340034		-0.00994324	47.8871	0.0253518	20.224		4
CC_OL_007_E14	0.320066	28.3192	-0.00596271		-0.175452		0.156071	22.6047	0.13381	36.305		4
CC_OL_007_F06	0.13384		0.0563225		0.1847	31.928	0.0234931	22.6047	0.333949	5.47181		4
CC_OL_007_G08	0.279346	31.7794	-0.0241245		-0.130336		0.0443416	46.0931	0.216067	9.03094		4
CC_OL_007_G23	0.130704		0.007747		0.111687		0.300268	13.6888	0.653702	3.10331	21.572	4
CC_OL_007_H19	-0.0440515		0.0803041		-0.0486025		-0.00956235		0.536196	3.10331	29.4675	4
CC_OL_007_M14	0.588959	5.13837	0.0924097		0.0845251		0.0894231	22.6047	0.244587	9.03094		4
CC_OL_007_P15	0.194227		-0.129902		-0.0217728		0.185222	9.83518	0.265881	20.224	45.3265	4
CC_OL_007_P22	0.205397	28.3192	-0.06402		-0.0370593		-0.099955	46.4495	0.191307	36.305		4
CC_OL_008_B19	0.164926		0.313458		-0.259006		-0.193608	29.421	0.190202	7.5619		4
CC_OL_008_B22	0.159214	31.7794	-0.0735736		0.0179031	38.1234	-0.0912296	42.9187	0.278659	3.5488		4
CC_OL_008_G21	0.240692	49.1692	-0.16647		-0.136135		0.0878877	22.6047	0.412414	3.10331		4
CC_OL_008_I18	0.238415	49.1692	0.179189		-0.069742		0.028105	46.0931	0.538007	3.10331		4
CC_OL_008_L07	0.142654	49.1692	0.253027		0.0458834		-0.058401		0.0491636	22.8514		4
CC_OL_009_C16	-0.0971565		0.0950315		-0.158559		-0.241111	13.6888	0.18189	20.224		4
CC_OL_009_F01	-0.184342		-0.49506		-0.157277		0.081499	29.421	0.17739	5.47181	29.4675	4
CC_OL_009_G18	0.217094		0.160864		0.0371759	43.057	-0.0164189	22.6047	0.223392	7.5619		4
CC_OL_009_I07	-0.43152		0.0288149		-0.159048		0.143515	13.6888	0.15123	20.224	47.8336	4
CC_OL_009_J02	0.0344013				-0.0910318		-0.26296	46.4495	-0.0791012	20.224		4
CC_OL_009_K06	0.194789	45.4405	-0.154944	38.9184	0.0266275		-0.0716543		-0.137722	32.952		4
CC_OL_009_K07	0.125363		0.00988424	38.9184	-0.194863		0.0648309	22.6047	0.123125	20.224		4
CC_OL_009_K10	0.0283059		0.262369		-0.201509		-0.127954	49.5597	0.0529585	35.1573		4
CC_OL_009_L13	0.509741	8.21346	0.450981		0.586867	14.2796	0.182046	22.6047	0.254839	5.00268		4
CC_OL_009_N23	0.0388958		0.00996843		0.11639	38.1234	-0.0679673		0.108909	9.03094		4
CC_OL_009_O14	0.242475	49.1692	0.162711		0.055509		0.329896	7.50597	0.747784	2.36043	45.3265	4
CC_OL_009_O20	0.0862745		0.134333		-0.291672	43.057	-0.0708473	49.3629	-0.0580986	36.305		4
CC_OL_010_E05	0.0825741		-0.0117072		-0.470184		-0.0827889		-0.204837	28.5389		4
CC_OL_010_G03	-0.121051		-0.0476517		-0.00851634		0.0844274	35.5353	-0.0288939	36.305		4
CC_OL_010_G09	0.0204465		0.0936863		-0.0172575	38.1234	0.307399	16.9281	-0.0213693	9.03094		4
CC_OL_010_G15	-0.0304126		0.0736297		0.0958777	31.928	-0.312244	13.6888	-0.241228	32.952		4
CC_OL_010_K03	0.0654201		0.158195		-0.0789461		0.143433	22.6047	-0.220257	27.0897		4
CC_OL_010_N15	0.0852071		0.0533672		0.0509537		0.558034	3.66522	0.293182	5.47181	37.9165	4
CC_OL_011_A03	-0.113772		0.339924		-0.351881		-0.20546		0.0934232	20.224		4
CC_OL_011_A17	0.0775366		-0.172228		-0.168559		-0.065205		0.23576	20.224		4
CC_OL_011_C05	-0.0433286		0.325919		-0.195262		0.0770316	22.6047	-0.0185723	22.8514		4
CC_OL_011_D15	0.181734		0.266471		0.13388	31.928	-0.0533314	49.5597	-0.114231	36.305		4
CC_OL_011_G05	0.021726		0.13888		0.0877794		0.00367136	29.421	0.10003	26.944		4
CC_OL_011_G19	-0.229568		-0.441562	38.9184	-0.190901		-0.173568		-0.029571	20.224	34.6406	4
CC_OL_011_H09	-0.033113		0.176728				0.0346976	22.6047	0.0651597	32.952		4
CC_OL_011_I03	0.168362		0.0702737		-0.0625931		0.125135	22.6047	0.17994	25.5212		4
CC_OL_011_I04	-0.199065		-0.394326	38.9184	-0.069446		-0.360921	29.421	0.0148446	22.8514	36.3277	4
CC_OL_011_I06	-0.111489		0.176743		-0.0788918		0.191045	7.50597	0.208899	20.224	27.7537	4
CC_OL_011_J20	0.327575	31.7794	0.102979		0.0978793	38.1234	0.020594	29.421	0.34674	9.03094		4
CC_OL_011_K08	0.0997952		-0.0246697		-0.054709		-0.13571	32.6536	0.15052	20.224		4
CC_OL_011_K10	-0.166816		0.245576		-0.16655		-0.284328	4.8009	0.47262	20.224		4
CC_OL_011_K15	-0.189136		0.137445		-0.0946326		-0.0908676		0.262091	6.35742	41.5181	4
CC_OL_011_K20	0.0776432		0.137055		-0.082027		-0.152521	32.6536	0.0459718	20.224		4
CC_OL_011_M09	0.198899		-0.213444		-0.553373				0.167402	9.03094		4
CC_OL_011_P05	0.113878		0.522244		-0.0729689		0.0405209	22.6047				4
CC_OL_012_A02	0.214364		0.139636		-0.0355646		0.294104	6.05121	0.705888	0	37.9165	4
CC_OL_012_E14	-0.0134731		-0.0843064		-0.0567498		0.323945	9.83518	0.368057	3.10331	25.2603	4
CC_OL_012_E15	0.262743		-0.0615078		0.178869		-0.162261	47.8871	0.12898	9.03094		4
CC_OL_012_F05	0.0703569		-0.0877405		0.0280401		0.110568	13.6888	0.0365285	20.224	45.3265	4
CC_OL_012_H20	0.246741	49.1692	-0.391348	38.9184	-0.173202		0.260099	29.421	0.25561	20.224		4
CC_OL_013_B08	0.103446		-0.0251247	38.9184	0.154381	43.057	-0.0362023	49.5597	0.209857	20.224		4
CC_OL_013_B17	0.137963		0.085606		-0.0474948		0.371046	9.83518	0.0925998	20.224		4
CC_OL_013_E05	0.0885744		0.0814877	38.9184	-0.0916527				0.33847	9.03094	43.6613	4
CC_OL_013_E23	-0.0201667		0.278498		0.369717	31.928	0.0477167	44.7282	0.188705	20.224		4
CC_OL_013_G02	0.0571114		-0.280191	38.9184	-0.070975		-0.106744	46.0931	0.26453	9.03094		4
CC_OL_013_I19			0.200695		-0.224277				0.0128886	9.03094		4
CC_OL_013_J20	-0.193841		0.147011		-0.740761	3.78286	-0.361695	44.7282	0.230595	9.03094	37.9165	4
CC_OL_013_M17	0.181582		-0.0548657		-0.221406		-0.0274097		0.267131	20.224		4
CC_OL_013_N04	0.179506		0.282747		-0.00528124		0.463032	3.66522	0.301312	9.03094		4
CC_OL_013_O18	-0.372893	45.4405	-1.63828	6.39086	-0.456348		-0.00245235	13.6888	-0.0676209	33.9669	27.7537	4
CC_OL_013_P09	0.00565994		0.0180207		-0.151675		-0.135537	46.4495	-0.10565	27.9187		4
CC_OL_013_P16	0.301326	41.8869	0.277645		0.157552		0.592252	6.05121	0.282484	9.03094		4
CC_OL_014_F22	0.0444831		0.0956367		0.107663		-0.375686	0.470155	0.308519	2.36043		4
CC_OL_014_J17	4.57688e-05		-0.0132695		-0.0561505		-0.300927	29.421	0.0352722	26.944		4
CC_OL_014_P02	0.00613997		0.0307753		-0.301554	14.2796	-0.273342	16.9281	-0.0207319	26.944		4
CC_OL_015_B05	0.280605	35.6136	0.0116193		-0.135851		0.0653518	40.8976	0.219076	9.03094		4
CC_OL_015_C10	0.117298		0.378168		-0.196125		-0.0912577	47.8871	-0.0571432	29.2273		4
CC_OL_015_E08	0.0715092		-0.132719		-0.0268187		-0.161472	40.8976	0.37816	2.75107	47.8336	4
CC_OL_015_E10	0.256606	41.8869	-0.246603		-0.233108		-0.21437	13.6888	0.475409	1.5706		4
CC_OL_015_G01	-0.143549		0.0703218		-0.156233		-0.132657	49.3629	0.145678	20.224		4
CC_OL_015_G13	0.121951		-0.0757347		0.0684276		0.231626	13.6888	0.639487	2.75107	25.2603	4
CC_OL_015_J12	0.00215896		0.000821299		0.013038		0.0458157	40.8976	0.26058	4.15931		4
CC_OL_015_L08	-0.179634		-0.225851	38.9184	-0.217716		-0.0943316	46.0931	0.450431	9.03094	25.2603	4
CC_OL_015_L19	-0.235618		0.0425738		0.141753	46.6521	0.13447	13.6888	0.0216198	22.8514	43.6613	4
CC_OL_015_O18	-0.00511578		0.306905		-0.214531		-0.308881	7.50597	0.311778	6.35742		4
CC_OL_016_D13	-0.402449		0.0388758		-0.360787		-0.226653	9.83518	0.599452	1.85298	29.4675	4
CC_OL_016_D24	-0.055379		-0.0626562		-0.00137906		-0.0637751	46.7771	0.331824	5.47181	37.9165	4
CC_OL_016_E10	0.20562		0.159024		-0.0935632		-0.131315	35.5353	0.588793	6.35742		4
CC_OL_016_E21	-0.0878131		0.14731		-0.0992746		0.173679	13.6888	0.444499	6.35742	23.4266	4
CC_OL_016_J13	-0.0576932		-0.0214567		-0.0952671		0.0186034	32.6536	0.0474493	20.224		4
CC_OL_016_N06	0.0511842		-0.0687842		-0.176095		0.273862	13.6888	0.533901	0	23.4266	4
CC_OL_016_O18	0.0491206	49.1692	0.0986186		-0.25792		-0.0987301	38.4179	0.113281	22.8514		4
CC_OL_016_P08	0.45648		0.093005		0.0834759		-0.0785163	49.5597	-0.116096	32.346		4
CC_OL_017_A08	0.0817925		-0.000459327		0.0168201		0.033868	22.6047	0.200459	9.03094		4
CC_OL_017_D15	-0.00715614		-0.265382		-0.0828574		-0.0537881	35.5353	-0.0141475	31.5418		4
CC_OL_017_F03	-0.0272811		-0.813974	25.3071	0.0594214	43.057	0.00654542	29.421	0.0764395	26.944	45.3265	4
CC_OL_017_L17	-0.0805274		0.139778		-0.332732		-0.0143175		0.777014	3.5488	25.2603	4
CC_OL_018_E09	-0.172282		-0.118943		-0.418567	9.9843	-0.0859868		0.721101	0.704299	25.2603	4
CC_OL_018_E12	0.240321		0.206333		-0.10834		0.148377	32.6536	0.265175	5.47181		4
CC_OL_018_H05	0.139389		0.104058		-0.177441		-0.180753	46.7771				4
CC_OL_018_H10	-0.118895		-0.00651095		-0.196371		-0.274961	9.83518	0.18367	20.224		4
CC_OL_018_H21	-0.0437099		0.36351		0.0772865		0.128361	22.6047	0.587396	3.5488	36.3277	4
CC_OL_018_P12	0.0944537		-0.13903		0.0682366		-0.224582	22.6047	0.521051	4.15931	43.6613	4
CC_OL_019_A01	0.334226	35.6136	-0.150391	38.9184	-0.378175				-0.128773	33.9669		4
CC_OL_019_A03	0.136602		0.0365651		0.200181	31.928	0.12752	16.9281	0.285855	6.35742	40.1778	4
CC_OL_019_A15	0.140712		0.0492368		-0.0276617		-0.25248	42.9187	0.206374	20.224		4
CC_OL_019_B08	0.116263		0.228286		0.103205	38.1234	-0.0080193	38.4179	0.151233	20.224		4
CC_OL_019_C15	0.140981		-0.190654		0.439929	31.928	0.135225		0.336839	20.224		4
CC_OL_019_E15	0.140345		0.165975		0.0253452	38.1234	-0.0343497	29.421	0.317213	9.03094		4
CC_OL_019_E18	-0.0778368		-0.102506		-0.371014	9.9843	-0.076185	42.9187	0.333492	6.35742	41.5181	4
CC_OL_019_H21	0.0653901		0.298042		0.11305	46.6521	-0.0343647	46.4495	0.123793	25.5212		4
CC_OL_019_J18	0.0697358		-0.0510112		0.190229	31.928	0.157063	13.6888	0.40955	9.03094	47.8336	4
CC_OL_019_L10	0.0234526		-0.083814		-0.107642		-0.0822307	38.4179	0.202031	20.224		4
CC_OL_019_L24	0.0237314		-0.377262	38.9184	-0.133719		-0.131567	38.4179	0.246951	6.35742	37.9165	4
CC_OL_019_O08	-0.0304734		-0.0329996		-0.0106372		-0.0234578	13.6888	0.156609	9.03094		4
CC_OL_020_A10	-0.236927	22.8534	-0.428195	38.9184	-0.236977		-0.241886	29.421	0.283265	20.224	21.572	4
CC_OL_020_C06	-0.245543		-0.0386954		-0.284355	15.759	0.0662527	13.6888	0.217695	7.5619		4
CC_OL_020_C10	-0.191669		-0.0114473		-0.0387581		-0.394014	0.735115	0.0510927	22.8514	45.3265	4
CC_OL_020_D14	0.0871997		0.117557		-0.0334942		0.0223113	22.6047	0.151833	9.03094	43.6613	4
CC_OL_020_E18	0.313827	35.6136	-0.556979	36.199	0.0722013		-0.0759071	49.3629	0.451573	2.75107	45.3265	4
CC_OL_020_F07	0.21982		0.198923		0.13068	43.057	0.0839204	22.6047	0.0805671	20.224		4
CC_OL_020_F10	-0.20824		-0.0781889		0.00540266		-0.433045	3.66522	0.127377	9.03094		4
CC_OL_020_I06	-0.00767714		0.113116		-0.156848		-0.000566374	44.7282	0.0964225	20.224		4
CC_OL_020_M14	-0.221489	49.1692	-0.0354041		-0.0989609		0.0483586	44.7282	0.0873225	22.8514	45.3265	4
CC_OL_020_M15	0.508628	5.92376	-0.320438		-0.0203838		-0.161719	44.7282	0.244872	5.00268		4
CC_OL_020_P17	-0.0331234		0.0460503		0.0418101		-0.0769751	38.4179	0.23367	9.03094	49.6822	4
CC_OL_020_P18	0.0921662	45.4405	0.135565		0.100857	38.1234	0.122831	29.421	0.139926	22.8514		4
CC_OL_020_P23	-0.125362		-0.363664	38.9184	0.0881227		0.0375621	35.5353	0.184603	6.35742	9.61028	4
CC_OL_021_B04	0.126846		0.363443		0.0232821				-0.0439926	26.944		4
CC_OL_021_D24	0.140773		-0.426205	38.9184	0.214877	31.928	-0.0367326		0.37055	2.75107	45.3265	4
CC_OL_021_H21	-0.222903		-0.336407	38.9184	-0.125782		-0.183293	16.9281	0.0266112	26.944	36.3277	4
CC_OL_021_I23	0.242816	49.1692	0.0947275		0.0796359		0.0196963	46.0931	0.334391	20.224		4
CC_OL_021_N24	-0.0360031		0.0964001		-0.108641		-0.245975	22.6047	0.528454	2.02696	29.4675	4
CC_OL_021_O16	-0.0527695		-0.00609162		0.0637122		0.0579568	46.0931	0.373666	20.224	45.3265	4
CC_OL_021_P06	0.00426834		0.163176		0.0409644	43.057	-1.08413	6.05121	0.0700934	9.03094		4
CC_OL_022_C03	-0.149334		0.196453		0.256524	38.1234	-0.0817351		0.283209	9.03094		4
CC_OL_022_C14	0.368224	35.6136	0.396508		-0.214079		-0.222893	6.05121	0.00819799	26.944		4
CC_OL_022_I24	0.0117251		-0.0756006		0.178273	31.928	-0.188508	35.5353	0.0698119	26.944		4
CC_OL_022_J02	-0.445899	21.354	0.37387		-0.208487		-0.300953	13.6888	0.376231	20.224		4
CC_OL_022_K14	-0.0708608		-0.051779		0.0291433	46.6521	-0.158169	46.0931	0.0979446	20.224		4
CC_OL_022_P10	-0.0507819		-0.278109		-0.0860617		0.10439	22.6047	0.181183	9.03094		4
CC_OL_022_P11	-0.0113412		-0.33998	38.9184	-0.557456	38.1234	-0.16589	44.7282	-0.118606	32.952	49.6822	4
CC_OL_023_A17	0.45914	10.5894	-0.355402		-0.317583	15.759	-0.330553	47.8871	-0.127496	36.305		4
CC_OL_023_G13	0.0870899		-0.0457764		-0.243031		-0.217165	49.3629	0.119488	26.944		4
CC_OL_023_H06	0.220077	31.7794	-0.144856		-0.118685		0.460082	7.50597	0.356572	20.224		4
CC_OL_023_H22	-0.163171		-0.136286		-0.33123		-0.151085	22.6047	0.266587	6.35742	29.4675	4
CC_OL_023_L06	0.084484		0.342463		0.191647	46.6521	0.0633496	46.0931	0.199031	5.47181		4
CC_OL_023_L08	0.329703		0.0741993		0.0706218	46.6521	-0.108247	46.4495	-0.115202	32.952		4
CC_OL_023_L18	0.00939632		-0.0265568		-0.111292		0.0251877	29.421	0.160149	20.224		4
CC_OL_023_M24	0.12308		0.198369		0.0635759		0.24851	13.6888	0.36569	3.5488		4
CC_OL_023_O17	-0.264471		0.0684448		-0.128617		0.202394	13.6888	-0.10992	22.8514	37.9165	4
CC_OL_024_F16	-0.066783		-0.0259327		-0.220799		-0.111448		0.340268	3.5488	49.6822	4
CC_OL_024_H07	0.388129	28.3192	-0.148323		-0.253779	46.6521	0.0845649	13.6888	0.160412	20.224		4
CC_OL_024_H14	-0.0544608		-0.133247		-0.240002		0.226732	7.50597	1.26817	4.15931	12.7645	4
CC_OL_024_J23	0.10826		0.132594		-0.124849		0.18001	40.8976	0.21596	9.03094	40.1778	4
CC_OL_025_K11	0.105392		0.450027		-0.18835		0.125667	9.83518	-0.1656	30.7229		4
CC_OL_025_K21	0.202143		0.0815753		0.019289		0.307796	9.83518	0.684618	3.10331	19.7688	4
CC_OL_025_K22			-0.0319905		0.217577	31.928	0.219196	22.6047	0.203614	22.8514		4
CC_OL_026_A20	0.194471		-0.166875		-0.0206552		0.243923	6.05121	0.412511	3.10331	37.9165	4
CC_OL_026_D16	0.0868392		-0.00732615		-0.0592524		0.507332	7.50597	0.499849	2.75107	29.4675	4
CC_OL_026_H18	0.0861692		-0.180774		-0.0481091		-0.213226	16.9281	-0.0921578	32.952		4
CC_OL_026_I14	0.518694	21.354	0.580185		-0.146374							4
CC_OL_026_O05	0.187717		-0.038225		-0.11402		0.213462	16.9281	0.299504	6.35742		4
CC_OL_026_O16	-0.00895789		-0.157484		0.110028	31.928	-0.157915	32.6536				4
CC_OL_027_D21			-0.0493584		0.0630367		-0.26024	35.5353	0.064594	26.944		4
CC_OL_027_H05	-0.0465205		0.0379916		0.0249967	46.6521	0.102077	13.6888	0.23995	6.35742	19.7688	4
CC_OL_027_I01	0.363852	35.6136	-0.14403		0.0535906		0.00857507		-0.217111	28.5389		4
CC_OL_027_I02	0.603819	21.354	0.369575		0.251921		-0.0907654		0.0738458	20.224		4
CC_OL_027_L22	-0.199201				-0.148791		0.0297814	29.421	0.0185582	20.224		4
CC_OL_027_O08			0.335673		-0.278535	46.6521	0.204931	9.83518	0.308365	5.47181		4
CC_OL_028_D07	-0.0862977		0.235943		-0.132473		0.16402	16.9281	0.277791	7.5619	36.3277	4
CC_OL_028_G21	0.112527		0.224153		0.0407151		-0.0879515	46.0931	0.451141	5.00268	40.1778	4
CC_OL_028_I02	0.0623227		-0.162931		-0.275589		0.292006	13.6888	0.147205	20.224		4
CC_OL_028_I17	0.0513489		0.0346621		-0.0740724				0.0554148	22.8514		4
CC_OL_029_D23	0.158217		0.0742518		-0.360734		0.123891	9.83518	0.718743	9.03094	34.6406	4
CC_OL_029_E23	-0.12534		0.632543				0.115249	13.6888	0.238809	20.224		4
CC_OL_029_G14	0.0576525		-0.125152		0.0257465	38.1234	0.116651	16.9281	0.411288	4.15931	37.9165	4
CC_OL_030_A05	0.336368	31.7794	0.103092		0.484667	38.1234			0.358905	9.03094		4
CC_OL_030_E01	-0.171806		0.0689599		-0.194226		0.193146	22.6047	0.241597	4.15931	40.1778	4
CC_OL_030_E20	-0.0193771		-0.049712				-0.20557	40.8976	0.0273894	20.224		4
CC_OL_030_F06	0.431991	16.5889	0.130699		-0.047305		0.0613508	32.6536	0.365469	3.5488		4
CC_OL_030_G09	0.00151272		0.264606		0.0965059	31.928	0.0922069	16.9281	0.16084	20.224	43.6613	4
CC_OL_030_I24	-0.240358		0.299285		0.0364372		-0.406762	16.9281	-0.0456662	26.944		4
CC_OL_030_J18	-0.0377129		0.351277				-0.165806	49.3629	-0.0389652	20.224		4
CC_OL_030_K15	-0.027383		0.103478		-0.0453775		0.237568	9.83518	0.415452	2.75107	18.9075	4
CC_OL_030_K16	0.0364797		-0.157531		0.113762		0.403997	7.50597	0.310222	3.5488	43.6613	4
CC_OL_030_L05	0.0159222		0.262751		-0.0262421		-0.113913	40.8976	0.158265	20.224		4
CC_OL_030_L16	-0.0960337		0.146821		0.0745415	38.1234	0.319044	9.83518	0.39993	5.47181	21.572	4
CC_OL_030_N20	-0.0822097		0.0260751	38.9184	-0.0885887		-0.0407178	29.421	0.133797	6.35742	31.3939	4
CC_OL_031_D02	-0.241905		0.0302293		0.17822	38.1234	-0.0783349		-0.0771427	20.224		4
CC_OL_031_D09	0.32906	35.6136	0.00336475		-0.0652887		-0.206873	35.5353	-0.0144966	36.305		4
CC_OL_031_D11	0.0808339	49.1692	0.0421214		-0.124273		0.00326146		0.0588156	33.4832		4
CC_OL_031_D14	0.174942	49.1692	0.145427		0.0194407	43.057	-0.12836	42.9187	-0.320729	31.5418		4
CC_OL_031_M04	-0.688889	16.5889	-0.126589		-0.250639		0.0608666	22.6047	0.132432	20.224	19.7688	4
CC_OL_031_O14	-0.0717357		0.0229384		-0.0431646		-0.00658786		0.107916	20.224		4
CC_OL_031_O21	0.350383		0.143388		0.209124	38.1234	0.191974	13.6888	0.351352	5.00268	47.8336	4
CC_OL_032_B01	-0.125845		-0.321776	38.9184	-0.276274		-0.307537	1.90836	0.110308	20.224		4
CC_OL_032_G13	0.101887		-0.267889	38.9184	0.234363	31.928	0.318908	13.6888	0.241882	20.224	49.6822	4
CC_OL_032_I21	-0.0234736		0.116317		-0.181273		0.287657	7.50597	0.380576	5.47181	36.3277	4
CC_OL_032_J11	0.115216		-0.0949517		0.117769	31.928	-0.129298	38.4179	0.217165	7.5619		4
CC_OL_032_N09	0.235061	41.8869	-0.109844		-0.27568		0.489365	6.05121	0.460216	1.1548	31.3939	4
CC_OL_032_O13	0.963723	8.21346	0.101696		1.10841	0	0.73277	0.423656	0.230417	9.03094		4
CC_OL_033_B11	0.0882015	25.6173			0.220217	31.928	-0.089153		0.0945311	9.03094		4
CC_OL_033_B22	0.142088				0.0651411	43.057	0.235253	9.83518	0.152921	20.224	43.6613	4
CC_OL_033_F13	0.0519095		-0.816847	4.893	-0.12645		0.0917289	13.6888	0.437101	3.10331	37.9165	4
CC_OL_033_J18	0.00232467		-0.00741163		-0.0321464		0.31169	13.6888	0.233212	26.944	45.3265	4
CC_OL_033_N17	0.479099	16.5889	0.549775		-0.0185073	38.1234			0.266778	6.35742		4
CC_OL_033_P19	0.174366	45.4405	0.124564	38.9184	-0.0279966		0.183137	22.6047	0.416332	2.02696		4
CC_OL_034_B13	0.0182176		-0.238129		0.247557	38.1234	-0.0196207	46.4495	0.0535836	9.03094		4
CC_OL_034_E05	0.0965682		0.9016		0.0339885	38.1234	0.0148862		-0.00487763	25.5212		4
CC_OL_034_G03	-0.188628		0.132567		-0.0480265		-0.305938	16.9281	0.099193	20.224		4
CC_OL_034_G18	-0.152978		-0.455508	38.9184	-0.0362544		0.0197056		0.248592	2.36043	25.2603	4
CC_OL_034_G24	0.245311	45.4405	-0.223623		-0.141619		0.0613266	29.421	0.0601531	20.224		4
CC_OL_034_H08	-0.15091		-0.402778	38.9184	0.0522538		-0.0217005		0.3767	20.224	31.3939	4
CC_OL_034_H11	0.178202		-0.26926		-0.0356516		-0.115524	46.0931	0.0199069	32.346		4
CC_OL_034_H15	-0.280284	35.6136	0.026917		-0.140715		0.0780942	46.0931	0.0802428	20.224	34.6406	4
CC_OL_034_J01	0.384469	31.7794	-0.0586886		0.217525	31.928	0.112221	22.6047	0.017827	30.7229		4
CC_OL_035_F15	-0.118934		0.0593888		0.111194		0.0519919	22.6047	0.296324	20.224	41.5181	4
CC_OL_001_A11	0.0776765	49.1692	0.0325105		0.0731012	46.6521	0.312383	22.6047	0.465535	2.75107	18.9075	5
CC_OL_001_I03	-0.168806		0.24501		-0.181799		-0.146717	40.8976	0.267724	5.00268		5
CC_OL_001_J10	0.10194		0.0233557		0.110766		-0.234386	35.5353	0.188168	20.224		5
CC_OL_002_A09	-0.449114	24.3556	-0.492072	38.9184	-0.0893424	46.6521	-0.0166759	44.7282	0.424831	9.03094	49.6822	5
CC_OL_002_C04	-0.231718		0.05297		-0.0345383		0.00537446	22.6047	0.317503	9.03094	23.4266	5
CC_OL_002_D19	-0.177525		-0.375297	38.9184	-0.0455401		-0.0442889	49.3629	-0.0537042	26.944	31.3939	5
CC_OL_002_D22	-0.28838		-0.239054	38.9184	-0.0366354		0.029194	29.421	0.143202	25.5212	34.6406	5
CC_OL_002_E14	0.0198951		0.296075		0.159873	38.1234	-0.159076	46.4495	0.109076	22.8514		5
CC_OL_002_F05	0.443986	31.7794	0.585011		0.369056		0.302836	13.6888	0.671872	7.5619		5
CC_OL_002_F16	0.0943165		0.201079		0.358632	31.928	-0.0291654	47.8871	0.130725	20.224		5
CC_OL_002_F18	0.391218	22.8534	-0.102771		-0.136216		0.0415749	29.421	0.145781	7.5619		5
CC_OL_002_F24	0.165906		-0.0788242		0.0980454		-0.0651387	46.0931	0.456899	1.1548		5
CC_OL_002_I01	0.521406	13.7761	0.255109		0.0690834	43.057	0.149765	13.6888	-0.0383004	22.8514	14.3112	5
CC_OL_003_E02	0.509862	9.29258	0.381483		0.281228	38.1234	0.267617	9.83518	0.346123	20.224		5
CC_OL_003_F20	-0.0661437		-0.00381244		0.17641	38.1234	0.427486	9.83518	0.154103	9.03094	14.3112	5
CC_OL_003_I09	0.240346	35.6136	0.21743		-0.354168		-0.0132563	40.8976	0.273377	9.03094		5
CC_OL_003_N23	-0.0795246		0.0112601		0.253313	38.1234	0.213381	13.6888	0.340719	20.224	40.1778	5
CC_OL_004_D22	0.465078	16.5889	0.877586		0.278197	38.1234	0.61082	9.83518	0.569688	6.35742		5
CC_OL_004_E02	-1.04084	0			-1.27981	0	-1.00195	0	-0.262605	29.2273	18.5261	5
CC_OL_004_E16	0.64298	5.90913			0.44438	38.1234	0.136879	16.9281	-0.0195702	26.944	37.9165	5
CC_OL_004_H17	0.225898	49.1692	-0.154059		0.046107		0.111205	16.9281	-0.0151676	20.224		5
CC_OL_004_I02	-0.0290756		0.118756		0.568076	31.928	-0.0570672	29.421	0.137641	20.224		5
CC_OL_004_L15	-0.0987528		-0.360907		-0.0644976		0.077	29.421	-0.0134085	20.224	36.3277	5
CC_OL_005_A03	-0.0749328		-0.0238237		0.00533019		-0.124164	44.7282	0.37533	20.224		5
CC_OL_005_A21	0.0728499		-0.0769723		-0.0421823		-0.169484	29.421	0.407358	0.800515		5
CC_OL_005_O04	-0.320621		0.121518		0.00110547		0.00751406	22.6047	0.116994	20.224		5
CC_OL_005_O07	0.150341		0.31224		0.0825711		0.426979	9.83518	0.338637	2.75107	37.9165	5
CC_OL_006_B14	-0.163174		0.264443		0.0739716		0.114404	16.9281	-0.108547	36.305		5
CC_OL_006_J22	0.0768609		-0.0874744		0.0572159		-0.197997	29.421	-0.0120774	35.4545		5
CC_OL_006_K23	-0.0104159		-0.0676982		-0.111183		0.0387046		0.0573586	26.944		5
CC_OL_006_P17	0.216577	35.6136	-0.0831165		0.297239	15.759	0.220338	9.83518	0.716125	3.5488	43.6613	5
CC_OL_006_P18	-0.0445564		0.119972		-0.0426519	46.6521	0.217797	9.83518				5
CC_OL_007_D11	0.338898	45.4405	-0.0759879		0.132907	31.928	0.225401	22.6047	0.819586	4.15931	49.6822	5
CC_OL_007_J02	0.22573	41.8869	0.480842		0.361249	38.1234	0.035131	22.6047	-0.0919062	33.9669		5
CC_OL_007_J10	-0.180334		0.0526514		0.212838	31.928	0.0163261	46.0931	0.00244802	33.9669		5
CC_OL_007_P05	-0.0114644		0.0127916		-0.121128		0.311943	7.50597	0.154818	36.305		5
CC_OL_008_H06	0.107856		0.399241		-0.140028		-0.126496	13.6888	-0.0100829	20.224		5
CC_OL_009_H10	0.458202	31.7794	-0.111328		0.153494		-0.0073352		0.187645	26.944		5
CC_OL_010_A11	0.295133	45.4405	-0.359454				0.119799	22.6047	0.139983	20.224		5
CC_OL_010_A13	0.464049	16.5889	0.184092		0.154528		0.428988	9.83518	0.183267	20.224		5
CC_OL_010_C12	-0.159346		0.0645941		-0.551316	14.2796	-0.136784	42.9187	-0.110863	27.9187		5
CC_OL_010_I13	0.0780556		0.16278		-0.172285		0.419617	4.8009	0.424249	5.47181		5
CC_OL_010_N03	0.0716433		-0.0423602		0.040866	31.928	-0.0585517	49.3629	0.0768344	20.224		5
CC_OL_010_O04	-0.168887		0.162966		-0.0160047		-0.0678706	40.8976	0.117953	20.224		5
CC_OL_011_D13	0.180603		-0.355421		0.0511885		0.101863	16.9281	0.158365	9.03094		5
CC_OL_011_F23	0.0390727	45.4405	0.0609407		0.0442496		-0.547974	0.584132	0.271535	6.35742		5
CC_OL_011_N06	-0.0147666		0.00231408		-0.0862546		-0.15451	46.0931	0.112452	26.944		5
CC_OL_012_C03	-0.0731331		-0.150132		-0.102783		0.447045	3.66522	0.30503	20.224	45.3265	5
CC_OL_012_E11	0.00442532		0.109355		0.156843	31.928	-0.24792	4.8009	0.203509	26.944		5
CC_OL_012_H15	0.126279		0.106389		0.162096	38.1234	0.0898167	32.6536	0.238821	9.03094		5
CC_OL_012_O13	0.227809	41.8869	0.267305		0.0136613	43.057	0.132284	16.9281	0.0807754	26.944		5
CC_OL_012_P14	0.058909		-0.131194		0.153744	38.1234	-0.131392	35.5353	-0.498288	29.9152	10.1697	5
CC_OL_013_D17	0.0258874		-0.628267	38.9184	0.0426526		0.297484	9.83518	0.313971	26.944	41.5181	5
CC_OL_013_G13	0.102801		-0.0607548		-0.133902		0.116694		-0.110994	36.305		5
CC_OL_013_G19	0.374613	45.4405	0.363338		0.283883	15.759	0.137895	9.83518	-0.12628	29.2273		5
CC_OL_013_G22	-0.0850594		-0.195195		-0.0783232		-0.158084		0.138046	20.224	29.4675	5
CC_OL_013_H06	0.0534797		-0.0262371		0.111919		-0.0184673		-0.12023	36.305		5
CC_OL_014_N23			0.228647		-0.020783	46.6521	0.171326	16.9281	-0.0245496	33.9669		5
CC_OL_015_B04	0.0932383		0.470392		-0.133336		0.310701	9.83518	0.173801	9.03094		5
CC_OL_015_J13	0.12602		-0.0135737		0.0565776		0.0150378	32.6536	0.0740873	20.224		5
CC_OL_015_J15	-0.02289		-0.181271		-0.1445		0.42224	6.05121	0.211488	6.35742	27.7537	5
CC_OL_015_L12	-0.0824283		0.263113		-0.0376252		0.268282	13.6888	0.24306	9.03094		5
CC_OL_015_P12	-0.0132046		-0.203076		-0.0408712		-0.220404	16.9281	0.0161401	26.944		5
CC_OL_015_P19	-0.218977	41.8869	-0.375843		-0.16901		-0.125585	46.0931	0.110442	9.03094	14.3112	5
CC_OL_016_A05	0.000225974		0.682672		-0.139612		-0.34665	16.9281	0.158477	9.03094		5
CC_OL_016_C16	0.20133		0.608074		0.288945	31.928	-0.0241282		0.451418	9.03094		5
CC_OL_016_D03	-0.107707		-0.12186		-0.220409		0.0308388	32.6536	0.112946	36.305		5
CC_OL_016_G05	-0.190704		-0.110397		0.138802	38.1234	-0.12163		-0.214515	33.4832		5
CC_OL_016_N16	0.0250421		0.188396		-0.108361		-0.0356331	46.0931	-0.181136	27.0897		5
CC_OL_017_A05	-0.000843559		0.00988174		-0.44396		-0.220062	7.50597	-0.0651874	36.305		5
CC_OL_017_B13	0.059856		-0.104761		-0.158692		0.398465	0.361431	0.33696	9.03094	37.9165	5
CC_OL_017_P06	0.0729364		0.0782962		0.00829632	46.6521	-0.0528848	46.0931	0.145058	20.224		5
CC_OL_018_C11	0.075397		-0.122963		-0.201588		0.321713	7.50597	0.0307578	22.8514		5
CC_OL_018_G03	-0.164942		-0.17813	38.9184	-0.0325919		-0.280014	3.66522	0.273698	3.5488	37.9165	5
CC_OL_018_N09	0.11832		0.909906		-0.291316		-0.232355	32.6536	0.232213	9.03094		5
CC_OL_018_O04	0.209551		0.173352		0.773117	14.2796	1.16012	0	0.32434	6.35742	37.9165	5
CC_OL_018_O21	0.290753	35.6136	0.312822		0.0581125		0.196554	7.50597	0.225293	9.03094		5
CC_OL_018_P05	0.188088		0.168262		-0.126978		0.401123	9.83518	0.537284	5.00268	41.5181	5
CC_OL_019_H11	0.00635951		-0.374182	38.9184	-0.0287453		-0.0940589	49.3629	0.438735	3.5488	23.4266	5
CC_OL_019_H19	0.614591	9.29258	0.449152		0.352392		0.0950264	46.0931	0.380065	5.00268		5
CC_OL_019_J06	-0.117351		-0.109484		0.0278592	31.928	-0.144752	47.8871	0.322327	9.03094		5
CC_OL_019_N18	0.667895	2.89033	0.017707		-0.208989	31.928	0.526485	7.50597	0.35536	20.224		5
CC_OL_020_C23	-0.063274		0.667396		0.0300056		-0.0397073		-0.026304	35.6635		5
CC_OL_020_K15	-0.136603		0.0789669		0.0438276	38.1234	-0.155127	40.8976	0.168791	26.944		5
CC_OL_020_M04	0.136532		0.181057		-0.0804078		0.078909	22.6047	0.163693	9.03094		5
CC_OL_020_P04	-0.115786		-0.285132		0.103174		-0.0260024	29.421	0.155607	6.35742		5
CC_OL_021_D13	-0.104035		0.104248		0.0944672	31.928	0.430019	3.20256	0.642951	20.224	37.9165	5
CC_OL_021_E14	0.317529	28.3192	0.317693		-0.474617							5
CC_OL_021_N08	0.306401	41.8869	0.562803		-0.15408		-0.249962	2.49879	-0.250757	29.2273		5
CC_OL_022_F03	0.042647	45.4405	-0.125793	38.9184	0.0219593		0.0646576	35.5353	0.0224148	26.944		5
CC_OL_022_H23	0.232615		-0.120166		0.00661855	46.6521	-0.128049	49.5597	-0.0420668	33.4832		5
CC_OL_022_L04	0.31168	45.4405	0.118752		0.0967408	46.6521	-0.0723717	49.5597	0.112706	20.224		5
CC_OL_024_J12	0.225153		-0.0489733		0.0988216	46.6521	0.0807721	22.6047	0.851751	5.47181	47.8336	5
CC_OL_025_A20	-0.048906		0.16306		-0.130716		-0.0136433	46.7771	0.167643	20.224		5
CC_OL_025_B23	0.303014	49.1692	-0.127012		0.0745698		-0.716687	0	-0.120758	27.9187		5
CC_OL_025_D02	-0.0525887		-0.0721727		-0.181846	46.6521	-0.0802182	46.0931	0.490035	5.00268	25.2603	5
CC_OL_026_G10	0.0923124		-0.0493188		0.139686	38.1234	-0.0256685		0.364275	3.5488	49.6822	5
CC_OL_026_I06	-0.0288222		0.0848424						0.0332584	20.224		5
CC_OL_027_D01	0.0207393		0.11096		0.33637	31.928	0.117005	13.6888	-0.134319	34.3739		5
CC_OL_027_D06	-0.0954903		-0.254054	38.9184	-0.248818	31.928	-0.307772	29.421	0.111047	9.03094	37.9165	5
CC_OL_027_H08	-0.122906		0.434185		-0.194137		0.0526386	16.9281	0.177639	20.224		5
CC_OL_027_K14	0.102006		0.297769		-0.00341392	46.6521	0.148018	16.9281	0.495171	9.03094	45.3265	5
CC_OL_027_M12	-0.0842664		-0.148746		0.300037	15.759	-0.158835	42.9187	0.227497	20.224		5
CC_OL_027_M14	0.0603671		0.17657		-0.168621		0.413913	6.05121	0.584781	1.1548	18.9075	5
CC_OL_028_J22			-0.0152002		-0.167574		0.0528162	29.421	0.417597	1.85298		5
CC_OL_028_K05	-0.0642753		0.585875		0.101311	38.1234	0.264468	13.6888	0.397862	5.47181	45.3265	5
CC_OL_028_N02	-0.052467		-0.11361		0.194194		0.00275244	46.0931	0.208339	7.5619	40.1778	5
CC_OL_029_B18	-0.0416531		-0.0366643		-0.144863		0.220819	9.83518	0.121265	22.8514	47.8336	5
CC_OL_029_G09	0.0736388	41.8869	-0.162173		-0.0458408		0.350647	3.66522	-0.0561426	26.944		5
CC_OL_029_N13	-0.0606158		-0.346004		-0.226022		0.310597	9.83518	0.651798	5.00268	36.3277	5
CC_OL_030_B10	0.0147919		-0.150566		0.00111817		-0.161969	35.5353	-0.0860771	32.346		5
CC_OL_030_H16	-0.0211416		-0.0856752		-0.129448		0.32117	9.83518	0.289729	5.47181	23.4266	5
CC_OL_030_H17	0.15318		-0.0156577		-0.148739		0.208643	13.6888	0.443759	20.224	41.5181	5
CC_OL_031_I05	0.199761		0.127138		0.0124605		0.429144	13.6888	0.3645	5.47181	41.5181	5
CC_OL_031_K02	0.134717	49.1692	-0.21529		-0.0963074		0.268541	9.83518	0.378829	2.75107		5
CC_OL_032_P06	0.258053		-0.0920556		0.369764	31.928	0.200647	9.83518	0.738293	9.03094	43.6613	5
CC_OL_033_C23	0.174572	49.1692	0.358575		0.123066	43.057	0.0201429	32.6536	0.544492	5.47181		5
CC_OL_033_H19	0.146028		-0.0376378		0.00785507		-0.146578	49.3629	-0.0194882	36.305		5
CC_OL_033_H20	0.16799		-0.277427	38.9184	-0.336206	14.2796	-0.134977	47.8871	0.18524	20.224		5
CC_OL_033_L15	0.886716	0	0.0196427		0.613888	15.759	-0.0294487		0.131551	6.35742		5
CC_OL_033_N14	0.211454				-0.0734833		0.0665753	22.6047	0.462707	9.03094		5
CC_OL_034_A23	0.354269		0.202079		-0.14751		-0.0162856	29.421	0.0657517	35.1573		5
CC_OL_034_D11	0.0967804	41.8869	-0.173345		0.153134	38.1234	0.10508	22.6047	0.117211	7.5619		5
CC_OL_035_L23	0.0977862		0.212871		-0.236028		0.150118	22.6047	0.00539759	20.224		5
CC_OL_001_G02	-0.0508274		-0.118499		-0.0735652		0.013567		0.0155011	20.224	47.8336	6
CC_OL_001_M08	0.152053		0.00279645		0.292694	38.1234	-0.0167875	46.0931	-0.119581	36.305		6
CC_OL_002_D20	-0.292392	45.4405	-0.145078		0.169087		-0.238699	3.66522	0.300161	9.03094	36.3277	6
CC_OL_002_D23	-0.132568		0.207328		0.169946	31.928	-0.0679708		0.300384	9.03094		6
CC_OL_002_F13	-0.697643	5.47142	-0.577632	14.679	-0.0285575		-0.0206051	47.8871	-0.141917	26.944	9.61028	6
CC_OL_002_G14	-1.32479	0	-1.3608	10.9009	-0.14531		-0.167	49.3629	-0.035575	31.5418	12.7645	6
CC_OL_002_H06	-0.54521	5.47142	-0.187579		0.050136		-0.28521	0.584132	-0.154578	27.4543		6
CC_OL_002_J03	-1.93469	0	-2.72968	0	-3.52793	0	-3.52242	0	-2.86465	0		6
CC_OL_002_K02	-1.42404	0	-1.52376	0	-0.382817		-0.59426	3.66522	-0.285652	3.5488	9.08296	6
CC_OL_002_L10	0.00514144		-0.117527		-0.0497854		-0.0765807	47.8871	-0.00124019	36.305		6
CC_OL_002_N09	0.190707	41.8869	0.236759		-0.0989859		-0.377268	1.29953	0.494475	9.03094		6
CC_OL_002_N10	-0.19513		0.150547		0.272166	15.759	0.106191	29.421	0.263817	9.03094	37.9165	6
CC_OL_003_B15	-0.292423	45.4405	0.696923		0.0922325	31.928	-0.119075	47.8871	-0.180762	27.9187		6
CC_OL_003_E01	-0.378556				-0.0387158		0.304318	29.421	0.432442	9.03094	43.6613	6
CC_OL_003_H07	-0.271148		-0.792538	36.199	-0.0781857		-0.277401	46.0931	0.284325	9.03094	23.4266	6
CC_OL_003_J23	-0.348166		-0.172006		0.137954	38.1234	-0.343216	4.8009	-0.0418345	26.944		6
CC_OL_003_N12	-0.0361265		-0.28293	38.9184	0.139191		-0.406833	1.90836	0.757182	0	36.3277	6
CC_OL_003_N15	-0.120157		-0.182153		0.194884	31.928	0.00501697		0.168677	9.03094	23.4266	6
CC_OL_003_O13	-0.0837925		-0.172528		0.0239144	43.057	0.233134	9.83518	0.333825	2.36043	21.572	6
CC_OL_003_P17	-0.209855	41.8869	-0.156116		0.132228	31.928	-0.0884219	29.421	0.290448	9.03094	10.1697	6
CC_OL_003_P24	0.0738888		-0.144003		-0.00514922		-0.124395	47.8871	0.383296	20.224		6
CC_OL_004_A09	-0.519286	21.354	0.00525553		0.136558		0.0131654	44.7282	0.772683	0	25.2603	6
CC_OL_004_A24	-0.189101		-0.105797		-0.153866		-0.487449	0.735115	0.172466	9.03094		6
CC_OL_004_B07	-1.20167	7.85391	-0.0343282		0.0541617	38.1234	-0.363216	6.05121	-0.132705	31.5418	45.3265	6
CC_OL_004_J18	0.00675488		-0.380158	38.9184	0.472388	38.1234	0.167813	9.83518	-0.0348208	20.224	25.2603	6
CC_OL_005_M08	-0.19353		0.0365683		-0.184836		-0.263177	46.0931	-0.00899548	36.305		6
CC_OL_005_N04	-0.42991	13.7761	0.390073		0.31067	15.759	-0.115341	38.4179	0.467296	2.36043	45.3265	6
CC_OL_006_K17	0.00328243		-0.438115		0.293482		-0.15686	49.3629	-0.248268	30.7229		6
CC_OL_006_L01									0.686822	5.47181		6
CC_OL_006_M20	-1.22652	5.59812	-0.0565739		-0.333452		-0.306473	16.9281	-0.236434	29.9152	27.7537	6
CC_OL_007_M05	-0.329809		0.165426		-0.115628		-0.15446	46.0931	0.0655908	26.944		6
CC_OL_007_O20	-0.0446765		0.140383		-0.0691612		0.0222092	22.6047	0.0520738	20.224		6
CC_OL_008_F08	0.237948	35.6136	0.076812		0.0780701		-0.0717924	46.0931	0.00973901	36.305		6
CC_OL_008_L23	-0.429303	10.5894	-0.232368		-0.112322		-0.0955878		0.620512	2.75107	10.5994	6
CC_OL_008_N16	-0.0557256		-0.281295	38.9184	0.0289369		-0.0614472		0.178059	20.224		6
CC_OL_009_E08	-0.176676		-0.00836329		0.418538	38.1234	0.218402	9.83518	0.283726	20.224	36.3277	6
CC_OL_009_H22	-1.25471	0	-0.767361	38.9184	-0.591169	4.7587	-0.602231	0.826129	-0.223929	28.5389	37.9165	6
CC_OL_009_I12	-1.73394	3.40911	-0.904082	18.5297	-0.511959	38.1234	0.0730826	44.7282	1.31404	0.704299	0	6
CC_OL_009_I20	0.105045		0.0779262		0.271376	31.928	-0.344457	2.49879	-0.110892	32.346		6
CC_OL_009_M07	-0.0977356		0.0949796		-0.00203615		0.111692	16.9281	-0.194082	32.952		6
CC_OL_009_O12	-0.360438		-0.170594		0.127231		-0.301277	16.9281	0.426315	0.704299	36.3277	6
CC_OL_009_O22	-0.0295518		-0.266122		0.503585	15.759	-0.30516	6.05121	0.806135	4.15931	45.3265	6
CC_OL_010_D10	-0.470858	15.574	-0.200712	38.9184	0.0584743		-0.0301805	46.0931	0.157256	9.03094	40.1778	6
CC_OL_010_K06	-0.475615	19.5692	-0.0175408		-0.0704311		-0.275088	3.20256	-0.111531	36.305	49.6822	6
CC_OL_010_K10	-0.140486		0.358869		-0.117646		-0.137754	7.50597	0.112413	20.224		6
CC_OL_010_L02	-0.103051		-0.322544	38.9184	0.0162172		0.450942	0.423656	0.214729	20.224	31.3939	6
CC_OL_011_I14	-0.0419125		-0.22268	38.9184	0.8811	31.928	0.432068	9.83518	0.179425	9.03094	31.3939	6
CC_OL_012_F24	0.0240027		-0.22573		-0.0674511		-0.320529	16.9281	0.223472	9.03094		6
CC_OL_012_H11	0.0773331		-0.297817	38.9184	0.0781895		-0.0553014		0.255147	4.15931	49.6822	6
CC_OL_012_H23	0.00759102		0.0340671		0.202594	43.057	-0.14335	42.9187	0.345627	5.47181		6
CC_OL_012_K06	-0.270812	21.354	-0.774653	38.9184	-0.270361		0.052036	49.3629	0.0131158	26.944	29.4675	6
CC_OL_013_C03	-0.206119		0.0837921		0.0691336	43.057	0.328612	7.50597	0.252495	20.224		6
CC_OL_013_C16	-0.080728		0.141218		-0.0527717		-0.0121379	29.421	-0.0121547	26.944		6
CC_OL_013_F21	-0.705783	5.59812	0.00226407		-0.0505874		-0.0424447		0.910386	5.00268	10.1697	6
CC_OL_014_A17	-0.220652		0.0182118		-0.183882		-0.282083	3.66522	0.326312	9.03094	31.3939	6
CC_OL_014_E03	0.0426245		-0.13857		-0.0592362		0.19103	22.6047	0.527951	5.00268	27.7537	6
CC_OL_014_H23			0.091583		0.172915	46.6521	0.502839	9.83518	0.257418	9.03094		6
CC_OL_014_J11	0.0999485		-0.127784		0.0788524	38.1234	0.132387	13.6888	0.35276	7.5619	41.5181	6
CC_OL_014_L22	-0.124315		-0.0428157		0.0802393		0.0164244		0.411728	3.5488	34.6406	6
CC_OL_014_P05	-0.055136		-0.0896542		0.0875241	43.057	-0.081474	46.4495	0.0550007	26.944		6
CC_OL_015_B20	-0.207808		-0.232158		-0.0371549		0.268706	22.6047	0.316152	6.35742	21.572	6
CC_OL_015_E17	-0.421478	35.6136	-0.276873	38.9184	0.224325	31.928	0.0506955	29.421	0.104356	20.224	27.7537	6
CC_OL_015_G08	0.315337		-1.11627	38.9184	-0.158348		-0.0419505		-0.0200596	26.944		6
CC_OL_015_G22	0.0953534				0.324795	15.759	0.0604752		0.207834	20.224		6
CC_OL_015_K05	0.0742306		-0.473721	38.9184	-0.0168367		0.228269	32.6536	0.0140581	36.305		6
CC_OL_015_L18	0.0331245		-0.089141		-0.022083		-0.0625155	49.3629	0.179206	5.00268		6
CC_OL_016_J05	0.146103		-0.248653	38.9184	0.253735	38.1234	0.19389	13.6888	0.499791	2.75107	31.3939	6
CC_OL_017_A07	0.430786	22.8534	0.725577	18.7392	0.645027	9.9843	0.830722	0.423656	1.06974	4.15931		6
CC_OL_017_F19	0.260312	35.6136	0.126762		0.26993	15.759	0.133063	9.83518	-0.0102516	22.8514		6
CC_OL_017_H04	0.128602		0.17413		0.0701637	43.057	-0.267925	13.6888	0.0188165	35.6635		6
CC_OL_017_K08	-0.324586		-0.595153		-0.40445	4.7587	-0.255107	47.8871	-1.37987	2.75661	23.4266	6
CC_OL_017_P13	0.026339		0.111676		0.11386	46.6521	-0.104455	22.6047	-0.0865134	32.346	31.3939	6
CC_OL_017_P15	0.141172		0.134772		0.211533	31.928	-0.0295879	46.0931	0.069759	26.944		6
CC_OL_017_P20			-0.513246	38.9184	0.245735	31.928	0.0844052	22.6047	0.766735	9.03094		6
CC_OL_018_C18	-0.373285	11.7111	-0.235712		0.0384603	46.6521	0.14652	29.421	0.278807	9.03094	21.572	6
CC_OL_018_G04	0.333023	21.354			0.0258124				0.214834	7.5619		6
CC_OL_018_G12	0.124568		-0.375847	38.9184	0.102379		0.0434775		0.321257	3.5488	45.3265	6
CC_OL_018_H04	-0.151623		-0.229305		-0.0534807		0.204785	7.50597	0.0540382	26.944	25.2603	6
CC_OL_018_O09	0.148325		-0.014556		-0.0197508		-0.135875	49.5597	-0.580629	20.224		6
CC_OL_019_A11	0.0636957		-0.192425	38.9184	-0.0902207		-0.0565424		-0.251495	26.9885		6
CC_OL_019_C07	-0.0397596		-0.206688		0.234226	31.928	0.0722659	29.421	0.0458926	36.305		6
CC_OL_019_D07	-0.316459		-1.11017	38.9184	-0.0393676		0.0310948	29.421	0.157183	20.224	40.1778	6
CC_OL_019_H20	-0.0030915		-0.236652		0.0110522		-0.0593945	46.0931	0.0458152	26.944	47.8336	6
CC_OL_019_K10	-0.466672	5.92376	-0.493033	38.9184	-0.11931		-0.182692	16.9281	0.156155	20.224	17.2576	6
CC_OL_019_P06	-0.130263		-0.494749		-0.061773		-0.252734	1.29953	-0.0736895	26.944		6
CC_OL_019_P18	-0.314759		-1.32866	11.9735	-0.201497		-0.283079	3.66522	0.0333078	36.305	36.3277	6
CC_OL_019_P21	-0.0303579		-0.0829281		-0.123212		0.0379114		0.353772	6.35742	45.3265	6
CC_OL_020_C17	-0.227579		-0.216094		-0.0721826		0.125897	49.3629	0.166097	9.03094	23.4266	6
CC_OL_020_I08	-0.231428		0.101195		0.0313084		-0.0988189		0.0174074	36.305		6
CC_OL_020_I16	-0.00940611		-0.711692		-0.111577		-0.190084	47.8871	0.147801	26.944		6
CC_OL_021_A03	-0.0627838		0.287931		0.0705218		0.343899					6
CC_OL_021_A09	-0.274067		-0.0057059		-0.108328		-0.385027	0.584132	-0.00206694	26.944		6
CC_OL_021_B10	0.025096		-0.17259		0.00969728	38.1234	0.227341	6.05121	0.585017	9.03094	34.6406	6
CC_OL_021_E09	-0.608737	11.7111	0.128224		0.0731647	38.1234	0.169254	16.9281	0.472397	9.03094	12.7645	6
CC_OL_021_K11	-0.102594		-0.191136		0.151451	46.6521	0.04819		0.174932	9.03094	43.6613	6
CC_OL_023_C20	-0.153249		-0.416073	38.9184	0.101962	46.6521	-0.122986		0.183396	20.224	36.3277	6
CC_OL_024_D03	-0.135136		0.354707		-0.142045		-0.0143016	46.0931	0.122161	26.944		6
CC_OL_024_G20	-0.0655841		-0.0835401		0.0116427		0.0154533	46.0931	0.179071	9.03094	37.9165	6
CC_OL_024_M07	0.0591707		-0.0684929		0.0197329		0.0566469	29.421	-0.0841801	31.5418	31.3939	6
CC_OL_024_O06	-0.053858		-0.0889794		0.379836	14.2796	-0.153889	9.83518	0.287315	9.03094	45.3265	6
CC_OL_025_F24	-0.099129		-0.114047		0.114164		-0.194774	32.6536	0.377696	3.10331	21.572	6
CC_OL_025_H21	0.0418722		-0.291162	38.9184	0.0627247		0.162361	29.421	0.404562	7.5619	25.2603	6
CC_OL_025_J04	-0.33142	25.6173	-1.09539	15.1433	-0.990756	8.60308	-0.637461	0.470155	-0.140765	33.4832	45.3265	6
CC_OL_026_J15	0.0407268		1.08802		1.12605	0	0.933155	0	0.537034	9.03094	45.3265	6
CC_OL_027_D17	0.260034	49.1692	0.188606		0.264504	31.928	0.0759933	29.421	0.518314	9.03094		6
CC_OL_027_K10	0.0458942		-0.0592857		0.121667	43.057	0.0218527		0.354358	9.03094	43.6613	6
CC_OL_027_P05	-0.215887		-0.133712		-0.184668		-0.211054	46.0931	0.209845	26.944	40.1778	6
CC_OL_028_A24	-0.0593366		-0.270362		0.415121	15.759	0.63703	2.49879	0.971043	1.1548	3.75166	6
CC_OL_028_E21	0.0265733		0.19097		0.355498	38.1234	0.368251	9.83518	0.869965	0.704299	9.61028	6
CC_OL_029_F15	-0.0562476		-0.176609		0.499213	31.928	0.493166	6.05121	0.485887	6.35742	49.6822	6
CC_OL_029_H21	-0.327691	28.3192	-0.132602		0.0957369		0.0714565	16.9281	0.149063	20.224	18.5261	6
CC_OL_029_I08	-0.451467	11.7111	-1.23514	38.9184	-0.48066		-0.537295	22.6047	0.137621	20.224	27.7537	6
CC_OL_029_J09	-0.36527		-0.740025	38.9184	0.284451	38.1234	-0.458967	2.49879	0.164183	9.03094	40.1778	6
CC_OL_030_C20	-0.356886	31.7794	-0.531049	38.9184	0.513893	15.759	0.256511	9.83518	0.835265	6.35742	9.61028	6
CC_OL_030_F24	-0.485358		-0.288731	38.9184	-0.745828	3.78286	-0.796238	0.584132	-0.331116	27.0897		6
CC_OL_030_K24	-0.0486366		-0.0602111		0.17458	31.928	0.188735	29.421	0.204495	9.03094	43.6613	6
CC_OL_030_M13	-0.0999507		-0.0297909		-0.0095316		-0.13098	46.0931	0.0935907	32.346		6
CC_OL_031_F06	-0.0290364		0.0509635		-0.00570497	46.6521	0.0904	35.5353	-0.00763698	25.5212	49.6822	6
CC_OL_031_F22	-0.0774642		0.203526		-0.010657		0.0806427	22.6047	0.21212	20.224	43.6613	6
CC_OL_032_B06	-0.442092	6.41452	-0.375024	38.9184	-0.00695977		-0.179267		0.351741	5.47181	9.61028	6
CC_OL_032_E10	-0.260177	21.354	-0.311937	38.9184	-0.410161	31.928	-0.0962933	42.9187	0.169912	4.15931	25.2603	6
CC_OL_032_G24	0.189312		-0.151996		0.0340609		-0.0862199	47.8871	0.0686476	9.03094		6
CC_OL_032_K12	-0.0240342		-0.0817262		0.129405	43.057	0.355477	9.83518	0.366936	20.224	49.6822	6
CC_OL_032_L05	0.183657		-0.108929		0.0337221		-0.154084	46.0931	0.25856	7.5619		6
CC_OL_032_N08	-0.05447		-0.37917		-0.464068	6.55539	-0.17104	44.7282	0.336001	9.03094		6
CC_OL_032_O12	-0.296553		0.230532		0.1911	31.928	0.365169	4.8009	0.320499	6.35742	31.3939	6
CC_OL_033_B17	-0.429206	13.7761	-1.29385	18.5297	-0.951348		-0.538878	1.90836	-0.151642	29.2273	45.3265	6
CC_OL_033_L14	-0.114889		-0.379822	38.9184	-0.153721		-0.167953	32.6536	0.0576766	20.224		6
CC_OL_034_B07	-0.175501		0.370127		0.740615	15.759	0.625248	0	0.564139	6.35742	9.61028	6
CC_OL_034_D20	-0.479791	5.59812	-1.16501		0.0373874		-0.00922967	49.3629	0.484398	20.224	27.7537	6
CC_OL_034_F21	-0.707055	24.3556	-1.01311	11.9735	-0.102158		-0.286039	3.20256	0.39378	2.02696	12.7645	6
CC_OL_034_G05	0.191313	49.1692	0.0820071		0.292675	31.928	0.0915307	22.6047	0.332566	2.75107		6
CC_OL_034_K18	-0.363014	13.7761	-0.412329		-0.259115		-0.732569	0	-0.222838	34.9462		6
CC_OL_034_M08	-0.284014		-0.0531676		-0.442049		-0.23728	2.49879	0.11096	20.224	31.3939	6
CC_OL_035_A03	-0.179021		-0.043886		0.134581	38.1234	0.179119	22.6047	0.0714928	9.03094	37.9165	6
CC_OL_035_D15	-0.474999	15.574	-0.236647		0.00757732		0.169877	16.9281	0.483565	9.03094	23.4266	6
CC_OL_035_M02	0.163124		-0.155945		-0.167642		-0.253678	3.66522	0.104806	26.944		6
CC_OL_001_B14	-0.131512		-0.047071		0.0197416		-0.0783406	47.8871	0.0394038	26.944	45.3265	7
CC_OL_001_D09	-0.22209		-0.0786488		-0.003724		-0.0307248		0.171833	9.03094	49.6822	7
CC_OL_001_I21	-0.245034		-0.0337648		0.340131	31.928	-0.292621	35.5353	-0.0882671	35.6635		7
CC_OL_001_K09	-1.00282	2.46214	-0.285899	38.9184	0.0991279	38.1234	-0.315772	16.9281	-0.404963	25.5212		7
CC_OL_001_M22	-0.31358	9.29258	-0.377247	38.9184	0.169124	43.057	-0.00932114	46.0931	0.164107	20.224	12.7645	7
CC_OL_001_N03	0.21096	41.8869	-0.372408	38.9184	0.0599656	46.6521	-0.170108		0.107868	20.224		7
CC_OL_001_N13	-0.735847	19.5692	-0.592806	38.9184	-0.200154		-0.306746	3.20256	-0.226096	27.0897		7
CC_OL_001_P10	0.0202034	41.8869	0.0192094		0.0344184		-0.179295	32.6536	0.0941083	20.224		7
CC_OL_002_I02	-0.628023	3.40911	-1.21833	0	-1.79336	0	-2.15111	0	-1.25622	22.8514		7
CC_OL_002_J15	0.137763	49.1692	0.283251		0.086308	31.928	0.145463	13.6888	0.44979	1.77321		7
CC_OL_002_J22	-0.745533	5.25812	-0.0563192		0.339704	15.759	-0.401635	1.90836	-0.471805	26.944		7
CC_OL_002_M04	0.100811		-0.321952		0.209745	31.928	0.282867	9.83518	-0.0291578	22.8514	37.9165	7
CC_OL_002_M10	-1.32444	0	-0.94827	7.1171	-0.0409903		-0.619164	22.6047	-0.680143	0	47.8336	7
CC_OL_002_N02	-0.595261	5.25812	-0.248797	38.9184	-0.00441049		-0.166695	38.4179	-0.0789034	20.224	27.7537	7
CC_OL_002_P23	-0.0576485		0.0671832		0.0208956		-0.337275	3.20256	-0.103735	28.5389		7
CC_OL_003_A08	-0.515574	21.354	-0.324762		-0.136889		-0.496592	0	-0.483878	27.9187		7
CC_OL_003_A15	0.65121	5.13837	-0.374873	38.9184	0.308456	31.928	0.19547	9.83518	0.93168	1.1548	45.3265	7
CC_OL_003_G11	0.0767339		-0.245617		-0.105431		-0.443078	0.735115	0.132854	20.224		7
CC_OL_003_H01	0.102156	45.4405	-0.12008		0.125477	31.928	0.324239	9.83518	0.0930231	20.224		7
CC_OL_003_H05	-0.0788484		0.136265		0.0955523		0.231754	9.83518	0.00780432	36.305		7
CC_OL_003_H12	-0.337765		-0.366351		0.250582	38.1234	-0.131007	35.5353	-0.261161	32.346		7
CC_OL_003_H17	-0.228634		-0.157088		0.0157606	46.6521	0.0514851	22.6047	0.259527	3.5488	27.7537	7
CC_OL_003_K07	-0.420456	5.59812	-0.733945	32.5973	0.00662904		0.121342	22.6047	-0.0692887	30.7229	34.6406	7
CC_OL_003_M20	-0.965547	5.25812	-0.13703		-0.199289		-0.13151	7.50597				7
CC_OL_004_B19	0.173203	45.4405	0.1938		0.402978	46.6521	0.546405	6.05121	0.22457	9.03094		7
CC_OL_004_D12	-0.0133132		0.135127		0.0215948		-0.136714	46.0931	-0.114664	29.9152		7
CC_OL_004_E07	-0.17926		-0.187838		0.243637	31.928	-0.310783	4.8009	0.0385038	26.944	34.6406	7
CC_OL_004_F17	-0.2759		-0.0605875		0.553637	31.928	0.0991022	35.5353	-0.0825793	36.305		7
CC_OL_004_L12	-0.436742	21.354	-0.108914		-0.11919		-0.0755084	49.3629	-0.121969	27.4543		7
CC_OL_004_M07	0.102242		-0.150044		0.504211	15.759	-0.249561	16.9281	-0.199909	26.944		7
CC_OL_004_N15	0.187458		-0.474976	38.9184	0.218597	15.759	0.283679	9.83518	0.361061	9.03094	34.6406	7
CC_OL_005_B01	0.0349766		0.419029		0.147404	38.1234	-0.0141889		-0.0426999	30.7229		7
CC_OL_005_F14	0.199149	41.8869	0.0654042		0.0824889	38.1234	-0.150252		0.128725	9.03094		7
CC_OL_005_F21	-0.143767		0.147985		-0.00291394		0.0179599	46.0931	-0.146091	35.8456		7
CC_OL_005_K06	-0.0188576		-0.0183464		-0.00418448		-0.0708639	49.5597	0.0421806	20.224	36.3277	7
CC_OL_005_K07	0.214678		0.0549508		-0.123284		-0.173345	40.8976	-0.935826	6.35742	3.54609	7
CC_OL_005_O21	0.13308		0.0267512		0.175696	31.928	0.132286	22.6047	0.248925	5.47181		7
CC_OL_006_A16	-0.367863		-0.404718		-0.322641		-0.24839	46.4495	0.0459182	26.944	25.2603	7
CC_OL_006_B16	-0.0126674		-0.173511		0.352702	31.928	-0.196586	29.421	-0.0103368	32.346		7
CC_OL_006_C22	0.0174383		-0.164666		-0.111592		-0.430642	1.29953	-0.305849	27.9187		7
CC_OL_006_I22	0.0961145		0.0285103		0.203		0.120011		0.0379615	26.944		7
CC_OL_006_J20	-0.364314	21.354	-0.050903		-0.134654		-0.0552699		0.131956	20.224	14.3112	7
CC_OL_006_K15	-0.0886003		-0.269326	38.9184	0.00231149		-0.371734	0.584132	-0.490468	1.85298	45.3265	7
CC_OL_007_F11	-0.187275		-0.240603		0.0386019	38.1234	-0.176507	44.7282	-0.13629	29.2273		7
CC_OL_007_J16	0.1588		0.0294601		0.121943		-0.219091	9.83518	0.0496666	26.944		7
CC_OL_007_K07	0.318432	45.4405	-0.0530467		0.0704861	31.928	0.0913769	49.3629	-0.160771	29.9152		7
CC_OL_007_M02	0.0712608		0.139378		-0.0842751		-0.177406		0.0401153	26.944		7
CC_OL_008_B12	0.121223	45.4405	0.0667851		0.151348		-0.113928	46.0931	0.0991767	36.305		7
CC_OL_008_H19	0.0306198		-0.620832		-0.227174		-0.0845165	49.5597	-0.451743	26.944		7
CC_OL_008_L12	0.0942654		-0.0759803		0.104392	46.6521	-0.253253	32.6536	-0.541265	20.224	3.54609	7
CC_OL_008_O24	-0.794319	2.46214	-0.455767	38.9184	-0.294991		-0.740312	0	-0.843321	1.5706		7
CC_OL_009_B18			-0.277234	38.9184	0.500041	31.928	0.254258	6.05121	0.370591	20.224		7
CC_OL_009_E20	0.0719904		-0.148246		0.148363	31.928	-0.0757104	49.3629	-0.199662	28.5389		7
CC_OL_009_G09	-0.157315		-0.283984		-0.081556		0.0207965	47.8871	-0.046643	33.9669	36.3277	7
CC_OL_009_L10	0.0625964		0.0723662		0.00306981		0.134795	16.9281	-0.20791	28.5389		7
CC_OL_009_M13	0.23493	31.7794	-0.00724232		-0.114973	38.1234	0.378056	7.50597	-0.222222	26.9885		7
CC_OL_009_M19	0.123142		-0.257011	38.9184	0.0796306	38.1234	0.257236	22.6047	0.113242	26.944		7
CC_OL_009_O23	-0.0998765		-0.541982		0.0835314	46.6521	-0.180982	35.5353	0.186051	20.224		7
CC_OL_010_B11	-0.0826529		0.0301202		0.222003	31.928	-0.467793	1.29953	0.298903	4.15931		7
CC_OL_010_G02	-0.327013	25.6173	-0.288886		-0.0357252		-0.00938237	46.4495	0.295234	4.15931	18.9075	7
CC_OL_010_G05	0.0600637		0.146093		0.126579		-0.330169	0.584132	-0.132204	32.952		7
CC_OL_010_K07	0.0591481		0.05988		0.287543	31.928	-0.103304	49.3629	-1.13782	2.36043	12.7645	7
CC_OL_010_N11	0.201714	24.3556	-0.355893		0.295636	31.928	0.107887	22.6047	0.427839	5.47181		7
CC_OL_010_P23	-0.124499		0.221986		-0.0435555		-0.0736869		-0.0498301	32.346		7
CC_OL_011_A10	-0.391559	19.5692	-0.172801		-0.134606		-0.212492	4.8009	-0.210774	27.0897		7
CC_OL_011_D02	0.191598		0.675001	18.5297	0.698664	12.334	0.490034	6.05121	0.0446881	25.5212		7
CC_OL_011_D05	0.0396211		-0.260097		0.189004	38.1234	-0.298979	2.49879	-0.160365	28.5389	34.6406	7
CC_OL_011_D06	0.354266	16.5889	0.716947	8.17935	1.80583	15.759	1.307	0.423656	0.237512	9.03094		7
CC_OL_011_H16	-0.284403		-0.304993	38.9184	0.0322509		-0.115491	46.0931	-0.279937	28.5389		7
CC_OL_011_H21	0.31979		0.173596		0.140582		-0.344268	7.50597	-0.000949521	33.9669	25.2603	7
CC_OL_011_H24	-0.0699869		-0.00480626		0.287482	31.928	0.0186951	35.5353	-0.0346119	31.5418		7
CC_OL_011_K22	0.178457		-0.0869543		0.255931	31.928	-0.111462		0.242841	4.15931		7
CC_OL_011_L14	-0.057204		-0.0785593		-0.051793		0.685764	0.735115	0.24876	20.224	37.9165	7
CC_OL_011_N19	0.0301914		0.511517		0.475029	6.55539	0.140966	16.9281	0.279763	9.03094		7
CC_OL_011_O03	0.36554	28.3192	-0.0288656		0.287358	43.057	-0.146314	49.3629	-0.0698573	36.305		7
CC_OL_011_O11	-0.321197	16.5889			0.0782379	31.928	0.0170661		-0.124134	26.944	40.1778	7
CC_OL_011_O24	-0.179673		0.219594		0.131625	38.1234	-0.0936318		0.128487	9.03094		7
CC_OL_011_P15	-0.0439701		-0.341857	38.9184	0.115394		0.0673865	46.0931	0.0674406	26.944	41.5181	7
CC_OL_012_C06	-0.0148177		-0.437033		0.0367763		-0.215749	35.5353	-0.18646	36.305		7
CC_OL_012_E18	0.342689		0.432095		0.0348932	46.6521	-0.0421384		-0.580681	27.0897	7.67593	7
CC_OL_012_F21	0.226524		-0.0520234		-0.158966		0.113634	13.6888	0.0801388	26.944	47.8336	7
CC_OL_012_I06	-0.385884		-0.0936349		0.125664		-0.14465	49.5597	0.164929	26.944	49.6822	7
CC_OL_012_I09	-0.0975155		-0.0201738		-0.107768		-0.479597	0.584132	-0.67806	2.75661	3.82289	7
CC_OL_012_I17	0.110759		0.0974429		0.0161841		-0.0891892	46.7771	0.0990276	25.5212		7
CC_OL_012_L03	1.24087	5.13837	1.16751	7.9615	2.1538	0	1.961	0	0.588306	5.47181		7
CC_OL_012_O01	-0.243765		0.362551		-0.172301		-0.0216215	49.3629	-0.0920883	33.4832		7
CC_OL_013_A24	-0.15634		-0.0197138		0.0988738	43.057	0.049734		0.433044	3.10331	23.4266	7
CC_OL_013_B02	-0.151507				-0.149833		-0.450633	0.584132	-0.714689	27.4543		7
CC_OL_013_H13	-0.195614		-0.456192	15.1433	-0.115645		-0.301839	6.05121	-0.352293	9.03094		7
CC_OL_013_O04	-0.25584		-0.0650543		0.00463149		-0.129172	46.4495	0.125355	20.224	37.9165	7
CC_OL_014_E05	0.0606552		-0.0345101		-0.164025	46.6521	0.286147	13.6888	0.121826	20.224	41.5181	7
CC_OL_014_J16	-0.0819377		-0.210367	38.9184	0.0275359	46.6521	-0.0503794	42.9187	0.188331	22.8514		7
CC_OL_014_K06	-0.439734	22.8534	-0.113817		-0.359303		-0.24911	32.6536	-0.10991	33.4832		7
CC_OL_014_M03	0.316901	49.1692	0.235648		0.41554	38.1234	0.332567	6.05121	0.0979334	9.03094		7
CC_OL_014_M18	0.121637	41.8869	0.29884		0.0248781	38.1234	-0.11693		-0.0315869	33.4832		7
CC_OL_014_N15	0.0163418		-0.0354565		0.342839	31.928	0.161712	22.6047	0.0263877	36.305		7
CC_OL_014_O04	0.115624		0.0674767		0.106682		0.11944	16.9281	0.183867	20.224		7
CC_OL_015_I15	-0.421246		-0.627739		0.0572591		-0.0584589		-0.473283	2.36043		7
CC_OL_015_P07	-0.168977		-0.143653		0.0369065		0.00437369		0.229664	9.03094	45.3265	7
CC_OL_016_A22	0.237365		0.0127122		-0.0080759		0.202648	16.9281	0.231227	9.03094		7
CC_OL_016_D10	0.162039		-0.105678		0.0727498	38.1234	-0.00186433	46.0931	-0.309069	31.5418		7
CC_OL_016_E05	-0.122147		0.0212646		0.600346	15.759	-0.00181026	16.9281	0.347066	9.03094	29.4675	7
CC_OL_016_J02	0.469757	45.4405	0.133728		0.22585	31.928	-0.153964	47.8871	0.058177	36.305		7
CC_OL_016_K20	-0.197452		0.0424728		0.0762008	38.1234	0.022442	22.6047	0.045605	25.5212		7
CC_OL_016_O07	0.474945	15.574	-0.0284979		0.411557	31.928	0.0569493	40.8976	0.11499	20.224		7
CC_OL_016_O10	0.0579746		-0.0462972		0.00452789		-0.326641	3.66522	-0.0148942	36.305		7
CC_OL_017_A03	-0.0623958				0.166221		0.0128386	46.0931	0.167109	9.03094		7
CC_OL_017_B03	0.00226685		-0.573361	15.1433	0.0804495	38.1234	-0.43733	4.8009	-0.131919	32.952		7
CC_OL_017_B06	-0.122054		-0.0032352		0.745586	15.759	0.00400851	32.6536	-0.22001	32.346		7
CC_OL_017_C11			-0.195924		0.172857	43.057	-0.000885191		0.253019	5.00268	41.5181	7
CC_OL_017_E10	0.354188	35.6136	0.0208783		-0.135023		-0.360034	1.29953	0.187722	20.224		7
CC_OL_017_E21	-0.0636186		0.062444		0.0549127	46.6521	0.0118821		-0.0961331	32.346		7
CC_OL_017_F14	0.0508382		-0.755673		-0.113108		0.0843488	22.6047	0.128692	26.944	47.8336	7
CC_OL_017_O20	-0.468323	13.7761	-0.971187	36.199	0.274725	46.6521	-0.707878	0.470155	-0.790305	0		7
CC_OL_017_O21	0.187982	35.6136	-0.0112422		-0.056876		0.0359681	46.0931	-0.12062	27.4543		7
CC_OL_018_A22	-0.413419		-0.519366		-0.613419	1.44109	-0.61216	0.470155	-0.452007	9.03094		7
CC_OL_018_B02	-0.637797	5.47142			0.08362	38.1234	0.0978246	42.9187	-0.121595	36.305	9.61028	7
CC_OL_018_E02	0.198229	49.1692	-0.0153103		-0.140935		-0.0719129	47.8871	0.095546	26.944		7
CC_OL_018_E16	-0.07554		0.551418		-0.0144815		-0.0216342		0.0450251	26.944		7
CC_OL_018_I19	0.104875		-0.107702		0.312134	31.928	-0.0605725	47.8871	-0.138744	27.0897		7
CC_OL_018_K06	0.114218		0.0820993		-0.102232		-0.267091	16.9281	0.0516728	26.944		7
CC_OL_018_N04	0.125845				-0.0460701		-0.151209	46.0931	-0.166658	26.9885		7
CC_OL_018_O05	-0.283951		0.147938		0.440267	38.1234	-0.156412		0.080697	22.8514		7
CC_OL_018_O22	0.211391		0.0663261		0.143125		-0.0308383	46.7771	0.220053	9.03094		7
CC_OL_019_D01	0.163469		-0.159636		-0.0536729		-0.00345962	49.3629	0.176972	20.224		7
CC_OL_019_H06	0.0650962		-0.08994		-0.0504506		0.23888	22.6047	-0.0943285	33.9669		7
CC_OL_019_H14	0.0443808		0.00876197		0.0611679	31.928	0.430258	9.83518	0.479033	6.35742	34.6406	7
CC_OL_019_J19	-0.253221	31.7794	-0.461392	38.9184	0.217152	31.928	0.0976734	22.6047	-0.137994	33.9669	34.6406	7
CC_OL_019_L15	0.207585		-0.130999		0.207146	31.928	-0.237215	47.8871	-0.305788	20.224		7
CC_OL_020_C16	0.118406		-0.135208		-0.0372158		-0.125055		-0.141361	32.346		7
CC_OL_020_D11	-0.340426	22.8534			0.313973	15.759	0.603108	9.83518	0.483903	9.03094	12.7645	7
CC_OL_020_I15	-0.193804		-0.732548	38.9184	0.23966	31.928	0.228408	13.6888	0.120152	26.944	27.7537	7
CC_OL_021_I09	-0.12726		-0.09222		-0.158488		-0.0993086	47.8871	0.274401	22.8514		7
CC_OL_021_K21	-0.278123	31.7794	-0.0728914		-0.0785164		-0.0661262	47.8871	0.010791	26.944		7
CC_OL_021_L04	-0.172948		-0.00648807		0.0589382		-0.394884	42.9187	-0.0035968	32.346		7
CC_OL_022_A01	-0.477045		-0.327219	38.9184	0.0225616		-0.460206	0.735115	-0.536797	26.944		7
CC_OL_022_A19	-0.645571		-1.47504	17.1255	-0.820298	3.94019	-1.20712	0.470155	-0.0713126	29.9152		7
CC_OL_022_C05	0.3992	19.5692	0.546144		1.04719	0	0.451976	0.735115	1.19108	0	15.748	7
CC_OL_022_C06	-0.0715836		-0.135548		0.0206158		-0.377723	0.584132	-0.141137	29.2273		7
CC_OL_022_O03	-0.00514588		0.0526528		-0.166116		-0.0257539	32.6536	-0.157367	30.7229		7
CC_OL_023_E12	0.184372		-0.171822		-0.0257321		-0.00668592		-0.102267	35.1573		7
CC_OL_023_G05	-0.11088		0.0484304		0.0523374		0.111856	22.6047	-0.08659	36.305		7
CC_OL_023_G09	0.0350787		0.0396903	38.9184	0.227319	38.1234	0.0282959	29.421	0.226709	6.35742		7
CC_OL_024_E04	0.049545		-0.263889		-0.388891		-0.255085	47.8871	0.356898	3.5488		7
CC_OL_024_F05	0.487283		-0.0980802		0.111095	43.057	0.194547	29.421	-0.244454	29.9152		7
CC_OL_024_M06	0.184934		-0.169059		-0.0758701		-0.154563	46.0931	-0.283107	27.4543		7
CC_OL_025_A22	0.232151		-0.11427		0.116534	31.928	-0.195541	46.4495	0.215833	26.944		7
CC_OL_025_B07	0.102242		-0.190993		0.0178862		0.09745	29.421	-0.10516	35.1573		7
CC_OL_025_C11	-0.0541257		-0.0916328		0.18679	31.928	0.0649673	32.6536	-0.00536767	26.944		7
CC_OL_025_F14	0.0887569				0.158187	31.928	0.145717	22.6047	0.105824	20.224		7
CC_OL_025_I24	-0.027329		-0.319365	38.9184	0.0869892		-0.174855	35.5353	0.190306	26.944		7
CC_OL_025_J10	-0.0278407		0.0246093	38.9184	0.261951	31.928	-0.21246	49.5597	0.0308934	26.944		7
CC_OL_025_K15	0.0931886		0.0652487		0.00168421	31.928	0.244901	22.6047	0.351714	7.5619		7
CC_OL_025_M23	0.247921		-0.0870543		0.502943	31.928	0.342944	16.9281	0.287661	25.5212		7
CC_OL_026_A12	-0.0843808		-0.292778	38.9184	0.0731709	43.057	0.115908	29.421	0.26288	9.03094	37.9165	7
CC_OL_026_D06	0.134605		-0.0760692		-0.0651053		0.0119078	46.0931	-0.218353	29.2273		7
CC_OL_026_D14	0.0708676		-0.00231712		0.0555759		-0.200796	2.49879	-0.738566	0.924838	6.12367	7
CC_OL_026_D21	0.156609		0.00302882		0.29812	43.057	-0.134149	47.8871	0.0867434	20.224		7
CC_OL_026_F11	-0.0744158		-0.0725605		0.129847	38.1234	-0.217716	22.6047	-0.0213142	26.944		7
CC_OL_026_I23	-0.192838		-0.328345		-0.0132778		-0.301809	7.50597	0.133861	20.224	43.6613	7
CC_OL_026_J02	-0.256217		0.0457327		-0.0459459		-0.366819	40.8976	0.0339249	34.9462		7
CC_OL_026_M04	-0.409998	11.7111	-0.245788		-0.199312		0.208679	9.83518	0.171679	20.224	9.08296	7
CC_OL_026_O11	0.106669				0.149796	43.057	0.308807	7.50597	-0.170917	30.7229		7
CC_OL_026_P20	0.177797		-0.159119		0.153864	31.928	0.275122	9.83518	0.170456	25.5212		7
CC_OL_027_D10	0.122987		-0.0776883		0.363337	38.1234	0.0148697		-0.157311	32.952		7
CC_OL_027_G14	0.35367								0.121912	25.5212		7
CC_OL_027_H06	-0.019025		-0.212283		0.00204036		0.0145643	32.6536	0.0399676	36.305		7
CC_OL_028_A01	0.00543074		-0.229995		-0.399263		-0.0755786		0.327597	20.224		7
CC_OL_028_F10	0.168542	35.6136	0.751525	14.3107	0.743513	15.759	1.93811	0	0.166572	20.224		7
CC_OL_028_G05	-0.177331		-0.338965	38.9184	0.0282865		-0.210828	49.3629	-0.0732848	30.7229	49.6822	7
CC_OL_028_G23	-0.31993		-0.423101	38.9184	-0.46229		-0.380737	46.4495	-0.279814	29.9152		7
CC_OL_028_M01	-0.440709	5.90913	-1.02665	32.5973	0.0494443		-0.204091	49.5597	-0.44975	28.5389		7
CC_OL_029_A16	-0.354267		-1.31876	8.94721	-0.351644	12.334	-0.701107	0	-0.480654	27.0897		7
CC_OL_029_C21	-0.0159496		-0.201045		0.047702		-0.216468	32.6536	0.0106276	26.944		7
CC_OL_029_L09	0.060013		-0.298914	38.9184	0.0869861		-0.0344693		-0.28321	28.5389		7
CC_OL_030_B23	-0.124619		-0.1148		0.253913	31.928	-0.25721	35.5353	0.176983	5.47181		7
CC_OL_030_C10	0.0502933		0.0323437		0.142516	31.928	-0.0523985	49.5597	-0.24531	27.0897		7
CC_OL_030_E18	0.157709		-0.0856988		-0.211233		-0.376592	1.90836	-0.0990532	26.944		7
CC_OL_030_I22	-0.168766		-0.086809		0.246796	31.928	-0.155005	16.9281	0.361021	4.15931	41.5181	7
CC_OL_030_K04	0.322118	22.8534	-0.131299		0.218015	31.928	-0.293656	4.8009	-0.306614	27.4543		7
CC_OL_030_M06	-0.263997		-0.310606		0.177019	31.928	-0.395437	1.29953	-0.274134	27.9187		7
CC_OL_030_O01	-0.120465		-0.241897		0.561207	14.2796	0.0234114		0.076927	20.224		7
CC_OL_030_P12	0.00458567		-0.359057	38.9184	0.0814179		-0.220271	44.7282	0.067862	26.944		7
CC_OL_031_G18	-0.24974		-0.051282		0.112408		-0.417159	0.584132	-0.278845	26.944		7
CC_OL_031_H09	-0.00966425		-0.289129		0.0425273		-0.0202173	46.0931	0.0977333	20.224	29.4675	7
CC_OL_031_I02	0.430888	41.8869	-0.0789077		0.378294	31.928	-0.0694686		-0.083008	36.305		7
CC_OL_031_J07	-0.307671	49.1692	-0.367703	38.9184	-0.0275068	46.6521	-0.11114	40.8976	-0.37413	36.305	47.8336	7
CC_OL_031_J11	-0.162342		0.0394388		0.16093	46.6521	-0.0694311	46.7771	0.181411	6.35742	37.9165	7
CC_OL_031_J15	0.00694203		-0.256938	38.9184	0.16881	38.1234	-0.35215	49.5597	-0.00574477	20.224		7
CC_OL_031_J19	0.00652211		-0.525304	38.9184	0.172881	31.928	-0.0712417	44.7282	-0.274232	31.5418		7
CC_OL_031_M14	-0.189956		-0.102865		-0.0315314		-0.0197449		-0.051439	34.6792		7
CC_OL_031_N04	0.362444				-0.104548		0.0100749	35.5353	-0.102359	32.346		7
CC_OL_031_P11	0.109186	35.6136	-0.124738		0.145798	31.928	0.184659	13.6888	0.230515	6.35742	34.6406	7
CC_OL_032_A07	0.232261		-0.0800756		0.0286361	46.6521	0.177186	13.6888	0.115205	22.8514		7
CC_OL_032_B12	-0.589842	15.574	-0.997736	38.9184	-0.155621		-0.689558	3.20256	-0.502899	27.0897		7
CC_OL_032_E06	-0.210487		-0.321831				0.311508	7.50597	0.329713	7.5619		7
CC_OL_032_E22	-0.284079		-0.511229	38.9184	-0.0388334		-0.426141	16.9281	-0.117664	31.5418		7
CC_OL_032_H08	0.147444		0.0753473		0.18762	15.759	0.016962		0.246323	6.35742		7
CC_OL_032_J17	0.165096		-0.0436048		0.467584	15.759	0.271222	13.6888	0.0184527	22.8514		7
CC_OL_032_L24	0.42701	11.7111	0.129024		0.278646	31.928	-0.0580561	49.3629	-0.222117	27.0897	4.69886	7
CC_OL_032_N03	-0.318405		-0.409411		-0.221044		-0.0208012	35.5353	-0.0146532	32.346	45.3265	7
CC_OL_032_O02					0.311785	46.6521	0.587173	4.8009	0.211163	20.224		7
CC_OL_032_O03	-0.155295		-0.289943		-0.0321669		-0.072122	46.0931	-0.220733	25.5212		7
CC_OL_033_C12	0.0102737		0.226037		0.430796	8.60308	-0.268905	42.9187	0.558206	4.15931		7
CC_OL_033_E15			0.0144621		0.31751	31.928	0.0831011	29.421	0.0307779	26.944		7
CC_OL_033_H01	-0.514355		0.105109		0.262615	15.759	-0.38537	4.8009	-0.0832256	36.305		7
CC_OL_034_F05	-0.126277		-0.0442775		0.0686516	31.928	-0.0311906	32.6536	0.301049	6.35742	19.7688	7
CC_OL_034_F23			0.528368		0.208035	46.6521	-0.0744186		-0.27139	29.9152		7
CC_OL_035_F04	-0.180351		0.0693279		-0.195232		-0.215668	35.5353	-0.158354	30.7229		7
CC_OL_001_E04	-0.139866		0.0653416		0.24209	31.928	-0.184092	49.5597	-0.152985	32.952		8
CC_OL_001_H02	0.14343		0.00211704		0.233172	38.1234	-0.127907		-1.49432	0	3.82289	8
CC_OL_001_I18	-0.0636886		-0.158107		-0.0320187		-0.246852	29.421	-0.450388	27.9187		8
CC_OL_001_J06	-0.0377841		-0.0666459		0.399855	15.759	0.298534	13.6888	-0.255795	29.2273		8
CC_OL_001_J09	-0.450283	24.3556	-0.221768	38.9184	0.436542	6.14359	0.44951	7.50597	0.716493	5.00268	3.54609	8
CC_OL_001_J16	0.139784		-0.128884		0.150648	38.1234	0.0457612	46.0931	0.0435247	36.305		8
CC_OL_001_M06	-0.00741571		-0.1024		0.182862	31.928	-0.332142	4.8009	-0.257288	32.346	49.6822	8
CC_OL_001_M18	0.11089	35.6136	0.120324		-0.171376		-0.0429667	49.5597	0.0841476	26.944		8
CC_OL_001_N16	0.233035	41.8869	0.0072617		-0.04132		0.05938		-0.0491972	34.6792		8
CC_OL_001_O23	-0.0681538		-0.0183296		0.287974	31.928	0.0840439	22.6047	0.17443	9.03094	45.3265	8
CC_OL_001_P12	-0.233398		0.144206		0.0368277	43.057	0.166714	22.6047	0.152466	20.224	36.3277	8
CC_OL_002_B11	-0.220233	24.3556	-0.0818329		0.102624	31.928	-0.459595	1.90836	0.015408	33.9669		8
CC_OL_002_C08	0.0883514		0.0271691		0.118146	31.928	-0.194203	16.9281	-0.142613	34.3739		8
CC_OL_002_D07	-0.282432		-0.336254	38.9184	-0.453949		-0.308935	35.5353	-0.35631	27.0897		8
CC_OL_002_J08	-0.165559		-0.0070448		0.118908	38.1234	0.0730069	40.8976	-0.288223	33.4832		8
CC_OL_002_M09	-0.0647819		0.294609		0.292799	15.759	-0.228275	46.4495	-0.235435	33.9669		8
CC_OL_002_O21	0.112948		-0.433383		0.0431472	43.057	-0.815274	3.20256	-0.253297	27.0897	36.3277	8
CC_OL_003_D01	-0.203673		0.035881		0.0042034	46.6521	0.249461	9.83518	-0.526273	27.0897		8
CC_OL_003_D05	-0.275971	19.5692	-0.0862942		-0.202593		-0.0818979	49.5597	-0.147233	27.9187	47.8336	8
CC_OL_003_G07	-0.0850363		-0.0734896		0.447427	15.759	0.0272422	29.421	-0.0678528	36.305		8
CC_OL_003_I07	-0.0781882		-0.129072		0.219192	38.1234	-0.581987	0	-0.16041	27.9187	41.5181	8
CC_OL_003_M17	0.0346507		-0.0521389		0.243828	31.928	-0.00163136	22.6047	-0.450331	25.5212	34.6406	8
CC_OL_003_P12	-0.182887		0.312534		0.951467	12.334	1.09396	0.423656	-0.0889973	26.944		8
CC_OL_003_P14	0.157529		-0.0102035		0.255586	31.928	0.300809	6.05121	-0.227135	26.944		8
CC_OL_004_A10	-0.28321		-0.460793		0.065442	38.1234	-0.197712	32.6536	-0.552415	6.35742		8
CC_OL_004_D17	0.120165		-0.0772409		0.00114736		-0.0381283	46.0931	-0.00479094	30.7229	45.3265	8
CC_OL_004_E23	-0.259615		-0.22388		-0.0539112		-0.404163	6.05121	-0.510636	0.832354		8
CC_OL_004_I17	0.0944929		-0.00211052		0.28837	15.759	0.051008	35.5353	0.0455386	26.944		8
CC_OL_004_J15	-0.419447	25.6173	0.0372078		0.133373	31.928	0.097669	29.421	-0.402946	27.0897		8
CC_OL_004_M08	-0.0734702		-0.32836	38.9184	0.211135	43.057	-0.693622	0	-0.477547	27.0897		8
CC_OL_004_N07			-0.0626652		0.460747	31.928	-0.298722		-0.574267	25.5212		8
CC_OL_005_D01	-0.146249		0.103095		-0.00961908		-0.141926	32.6536	-0.475124	28.5389	15.748	8
CC_OL_005_M22	0.14056		0.185445		0.129721	38.1234	-0.13858	46.4495	0.0238001	26.944		8
CC_OL_005_N06	-0.0196194		-0.214424		0.24774	31.928	-0.0975425		-0.40883	9.03094		8
CC_OL_005_O02	-0.481614		-0.850189	8.17935	-0.0471134		-0.212321		-0.494871	29.2273		8
CC_OL_005_P13	0.08369		-0.209132		0.0235354		0.0979198	22.6047	0.328433	9.03094	25.2603	8
CC_OL_006_A21	-0.274198		0.225154		0.32331	38.1234	-0.477611	0.584132	-0.490773	9.03094		8
CC_OL_006_I03	0.142327		-0.177731		1.33057	14.2796	0.359694	9.83518	-0.0524811	26.944		8
CC_OL_006_M10	-0.217741	28.3192	-0.260829	38.9184	0.0341118	31.928	0.11059	22.6047	0.159103	20.224	43.6613	8
CC_OL_007_A16	-0.1345		-0.143364		-0.0726458		-0.234941	22.6047	-0.383107	35.6635		8
CC_OL_007_C20	0.303019	16.5889	-0.0815642	38.9184	0.225786	31.928	-0.133912	38.4179	-0.545189	5.47181	19.7688	8
CC_OL_007_F05			-0.250736	38.9184					-0.0624233	32.346		8
CC_OL_007_F20	0.42047	31.7794	0.070532		0.283549	12.334	0.0930628	44.7282	0.0226643	26.944	45.3265	8
CC_OL_007_H23	-0.168735		-0.17859		-0.0704635		-0.18837	16.9281	-0.267427	27.0897		8
CC_OL_007_K17	-0.353649	19.5692	-0.27675		0.0769245		-0.373872	46.4495	-0.131632	27.0897	47.8336	8
CC_OL_008_B01	-0.246594		-0.0301777		-0.157921		0.0599845	40.8976	0.131951	20.224	29.4675	8
CC_OL_008_F19	0.0420637		-0.348561		0.376088	38.1234	0.153341	13.6888	0.307965	9.03094	27.7537	8
CC_OL_008_I06	0.188389		0.168591		-0.00203559	38.1234	0.105448	16.9281	0.111989	20.224		8
CC_OL_008_J06	0.917782	16.5889	0.21639		0.394022	14.2796	0.251112	9.83518	0.423797	3.5488		8
CC_OL_009_A10	-0.030241		-0.0483695		0.108342		0.0453987	35.5353	-0.113093	29.9152		8
CC_OL_009_C12	-0.238814				-0.239636		0.0726526	22.6047	0.0225662	9.03094		8
CC_OL_009_F10	-0.0210873		0.119789		0.612877	38.1234	0.110595	22.6047	0.811364	9.03094		8
CC_OL_009_J17	-0.0145266		0.463328		0.0875571	38.1234	-0.193122		-0.229137	27.0897		8
CC_OL_009_K14	-0.0677461		0.213434		0.146512	31.928	-0.293025		-0.1016	33.9669		8
CC_OL_010_A16	0.112647		-0.334227		-0.16326		-0.268559	1.29953	-0.122879	29.2273		8
CC_OL_010_A23	0.192976		-0.127202		0.180117	31.928	-0.0971967		0.065082	22.8514		8
CC_OL_010_C03	0.489089	35.6136	1.39222	4.01477	1.85255	0	0.983459	0.361431	1.10588	9.03094		8
CC_OL_010_D22	-0.235995		-0.0969702		0.340568	43.057	-0.030547	32.6536	0.297594	6.35742		8
CC_OL_010_E13	0.0676748		-0.741075	38.9184	0.113732		-0.00328595	46.0931	0.0418478	26.944	47.8336	8
CC_OL_010_E21			-0.328092		-0.205462		-0.409451	16.9281	-0.72338	20.224	47.8336	8
CC_OL_010_F13	0.0995863		0.378663		0.0748624	38.1234	-0.235663	9.83518	-0.364886	27.0897	6.0807	8
CC_OL_010_N18	0.15028		-0.115173		0.0385888		-0.223322	35.5353	-0.33164	1.77321		8
CC_OL_010_O10	0.0249285		0.276132		0.394483	15.759	-0.0984024	46.7771	-0.552397	26.944		8
CC_OL_011_A06	-0.176477		0.0764672		0.2136	38.1234	-0.0962997	46.7771	-0.158748	29.9152		8
CC_OL_011_L01	0.463614	41.8869	-0.320368	38.9184	-0.105272		-0.0596838	49.5597	-0.0150575	32.952		8
CC_OL_011_N23	0.0897811		-0.267932	38.9184	-0.00174336	38.1234	-0.145318	42.9187	-0.309027	29.2273		8
CC_OL_011_O14	0.262489	45.4405	0.0114123		0.0936515	38.1234	-0.162155	44.7282	0.0203222	32.346		8
CC_OL_012_A15	-0.0689616		0.360332		0.505741	15.759	0.143538	16.9281	0.338528	20.224		8
CC_OL_012_B01	0.21212		-0.156746		-0.0709402		-0.187915	32.6536	-0.418642	29.2273		8
CC_OL_012_C23	-0.0831658	49.1692	-0.0699142		0.0469977		-0.0200751	46.4495	0.229955	35.9982		8
CC_OL_012_D08	-0.375341		-0.383023	38.9184			-0.253633	7.50597	-0.259672	29.9152		8
CC_OL_012_H14	-0.0108757		-0.0203415		-0.0355185		0.1637	16.9281	-0.0953259	34.6792		8
CC_OL_012_K05	0.0418168		0.112795		0.202486	31.928	-0.148686	32.6536	-0.2507	32.346		8
CC_OL_012_N05	0.0105533		-0.0444071		-0.0796001	46.6521	-0.187578	13.6888	-0.555264	6.35742	25.2603	8
CC_OL_012_P04	0.176425		0.116823		0.092997		-0.277588	46.4495	-0.577899	1.77321	4.91993	8
CC_OL_013_A23	0.121481		-0.1518		0.4563	46.6521	-0.294671	46.0931	-0.692758	27.0897	37.9165	8
CC_OL_013_B23	0.168967	35.6136	0.119185		0.192692	31.928	0.129903	44.7282	0.114597	20.224		8
CC_OL_013_B24	0.00318617		-0.206256	38.9184	-0.0634859		-0.21079	42.9187	0.247593	9.03094		8
CC_OL_013_C19	0.158308	41.8869	0.249025		1.41561	8.60308	0.772849	0	-0.226777	26.944		8
CC_OL_013_H14	0.228088		0.368264		0.00259028		-0.045822	49.5597	-0.245775	27.9187	40.1778	8
CC_OL_013_L17	0.00599355		-0.165015		0.263929	43.057	-0.0934928		-0.387428	31.5418		8
CC_OL_013_L19	0.134442		-0.220907		0.0865496		-0.212457	46.0931	0.123641	36.305		8
CC_OL_014_D20	-0.153375		-0.748045	38.9184	-0.154622		-0.507179	0.584132	-1.52893	0	17.2576	8
CC_OL_014_D21	-0.052412		-0.275705		-0.0672824		-0.194666	46.7771	-0.0223338	36.305	47.8336	8
CC_OL_014_G03	0.0259525		-0.0224194		0.15252	38.1234	0.0147173	49.3629	-0.177061	29.9152		8
CC_OL_014_H19	0.829603	35.6136			0.488284	31.928	0.20714	9.83518	0.167794	36.305		8
CC_OL_014_H21	-0.0554098		-0.319042	38.9184	0.0470898	46.6521	-0.242123	4.8009	-0.115828	29.9152		8
CC_OL_014_K09	0.267044	45.4405	0.183789		0.171727	46.6521	0.233483	9.83518	-0.207566	32.952	25.2603	8
CC_OL_014_K14	-0.0537647		-0.243829		-0.157443		0.151585	13.6888	-0.575878	27.0897		8
CC_OL_014_L21	-0.508951	7.85391	0.00226545		0.191805	43.057	-0.141875	47.8871	0.119161	26.944	36.3277	8
CC_OL_014_M04	0.226547		-0.161047		0.123444	31.928	0.2291	9.83518	-0.20435	27.0897		8
CC_OL_015_B07	0.167822		-0.119063	38.9184	0.230826	15.759	-0.191322	9.83518	-0.364038	3.10331		8
CC_OL_015_D04	0.164719		0.257292		0.286095	15.759	-0.11501		-0.349306	1.85298	19.7688	8
CC_OL_015_D22	0.141311	31.7794	-0.0130166		0.0712876		-0.189171	9.83518	-0.802798	5.47181	7.67593	8
CC_OL_015_M10	-0.360339		0.0198891		0.724903	15.759	-0.0439259		-0.233462	25.5212		8
CC_OL_015_N04	0.19345		0.282043		0.168537	31.928	0.0977708	35.5353	-0.182224	29.9152		8
CC_OL_016_A02	-0.295677	45.4405	-0.230377		-0.0394971		-0.151885	44.7282	-0.184592	32.346		8
CC_OL_016_F03	-0.00944882		0.0134303		-0.0168991	38.1234	-0.0593487		-0.0171726	36.305		8
CC_OL_016_G17	-0.119453		0.00958817		-0.134572		0.0629732	22.6047	-0.155761	27.0897		8
CC_OL_016_G18	-0.0210665		-0.613637	38.9184	-0.271806		-0.284918	0.735115	-0.873722	7.5619		8
CC_OL_016_L24					0.492271	38.1234	-0.0144797		-0.357568	29.9152		8
CC_OL_016_P06	0.123623		0.00854278		-0.145538	46.6521			-0.0748167	26.944		8
CC_OL_017_B22	0.396858	35.6136	0.276634		0.0516209	38.1234	0.0563086	49.5597	0.413399	2.75107		8
CC_OL_017_D11	-0.249219		-0.232321		-0.00489084		-0.101495	46.4495	-0.0699782	35.6635		8
CC_OL_017_G24	0.0339027		-0.138298		0.148446	31.928	-0.212028	46.7771	-0.4639	0	31.3939	8
CC_OL_017_M02	0.48823	19.5692	-0.13448		0.19837	38.1234	0.0983706	16.9281	-0.263224	30.7229	21.572	8
CC_OL_017_O14	-0.197856		0.0447416		-0.198691		-0.527964	3.20256	-0.48319	2.36043		8
CC_OL_018_A05	-0.098868		-0.117976		0.0164165		-0.111353	49.5597	-0.461471	30.7229		8
CC_OL_018_C13	0.0421281		-0.0221056		0.348395	31.928	-0.00840123		-0.0700345	34.9462		8
CC_OL_018_F24	0.355086	35.6136	0.150328		0.29347	15.759	0.0327763		0.337653	9.03094		8
CC_OL_018_K18	0.122827		0.0443258		0.241823	31.928	-0.0487136		-0.0272713	26.944		8
CC_OL_018_N17	-0.100646		-0.233253		0.149792	38.1234	0.319372	9.83518	-0.439272	1.1548		8
CC_OL_018_O07	-0.354997	5.90913	-0.805053	38.9184			-0.23105		-1.18994	3.10331		8
CC_OL_018_P04	0.0184928		-0.00493537		-0.162258		-0.341162	0.584132	0.0675366	33.9669	49.6822	8
CC_OL_019_F07	0.221253	49.1692	0.117139		0.423092	15.759	-0.0015003	49.5597	0.233983	9.03094		8
CC_OL_019_F23	0.110792		-0.32777	36.199	0.0471731		0.0368633		0.0703154	26.944		8
CC_OL_019_H22	-0.271805		-0.0495056		0.155119	38.1234	-0.0881883		-0.322891	27.0897		8
CC_OL_019_K03	-0.268465		-0.260027		0.245078	31.928	0.0735956	32.6536	0.205852	7.5619	25.2603	8
CC_OL_019_K08	0.236986	49.1692	0.362537		-0.0342966	46.6521	-0.0755905	49.3629	-0.0965406	29.9152		8
CC_OL_020_B01	0.0697813	45.4405	-0.0447272		0.0495156	38.1234	-0.114495	22.6047	0.204969	26.944		8
CC_OL_020_E14	-0.0368283		-0.163289		0.0533803		-0.146344	46.0931	-0.0741371	30.7229		8
CC_OL_020_J14	0.109743				-0.0409625		0.277291	0.735115	-0.0907247	34.3739		8
CC_OL_020_J22	-0.0655433		-0.521047	14.679	-0.105952		-0.389077	13.6888	-0.151108	29.9152		8
CC_OL_020_M17	-0.16895		0.124394		0.0382241		-0.0847769	46.0931	0.571645	3.10331	37.9165	8
CC_OL_020_N21	-0.0158186		-0.58673	38.9184	-0.287503		-0.817024	0.470155	-0.964163	20.224	29.4675	8
CC_OL_021_B06	-0.0940326		0.249892		1.00212	1.44109	0.236897	7.50597	-0.408888	26.944		8
CC_OL_021_D01	-0.103734		-0.0587009		-0.100854		-0.156429	22.6047	-0.00916899	31.5418		8
CC_OL_021_G20	-0.242825		-0.0255565		0.0950053	31.928	-0.305292	32.6536	-0.352606	36.305		8
CC_OL_021_J04	0.0540771		-0.0492361		-0.0331212		-0.0605111		-0.0130487	26.944		8
CC_OL_021_J10	0.141411		0.165122		0.0807483	38.1234	-0.29551	3.66522	-0.221115	28.5389		8
CC_OL_021_M09	0.204265		-0.0890306		0.123579	38.1234	-0.324161	3.20256	-0.152403	34.3739		8
CC_OL_021_O20	0.0400409	49.1692	-0.148774		0.157078		-0.286478	7.50597	-0.32346	5.47181		8
CC_OL_022_B08	-0.113262		0.00830789		0.0830129		-0.446959	7.50597	-0.542621	27.0897		8
CC_OL_022_C23	0.239425		-0.194921		-0.0173769		-0.318555	29.421	0.10497	9.03094		8
CC_OL_022_D05	-0.181142		0.179446		-0.187697		-0.172673	44.7282	0.30099	20.224		8
CC_OL_022_F01	-0.0609888		-0.171993		-0.192592	38.1234	0.260427	9.83518	0.0406527	26.944		8
CC_OL_022_G21	-0.112461		-0.356156		-0.28102		-0.276711	13.6888	-0.574555	27.0897	41.5181	8
CC_OL_022_H02	0.0828407		-0.195896		-0.17368		0.0370645	29.421	-0.592654	5.47181		8
CC_OL_022_M08	0.198428		0.565436		0.516472	31.928	-0.684461	0	-0.539754	9.03094	29.4675	8
CC_OL_022_M24	-0.370406	45.4405	-0.787531	15.1433	-0.484198		-1.21799	0	-0.833688	0.832354	27.7537	8
CC_OL_022_O04	0.0485819		0.0805231		0.0533549		0.0290355	46.0931	0.0489976	33.9669		8
CC_OL_022_O07	-0.05637		0.0895304		-0.0468784		-0.0367021	35.5353	-0.552432	25.5212	43.6613	8
CC_OL_023_C15	-0.0320028		-0.156647		0.110121	38.1234	-0.173752	42.9187	-0.0672211	30.7229		8
CC_OL_023_G03	-0.186354		0.00505193		0.448829	31.928	0.300155	4.8009	0.181931	20.224	31.3939	8
CC_OL_023_L09	-0.0609346		-0.464061	38.9184	0.161885	31.928	-0.143329	35.5353	0.171103	26.944		8
CC_OL_023_M13	-0.281231	35.6136	-0.795892	38.9184	-0.343978		-0.232685	46.0931	0.0249657	36.305	37.9165	8
CC_OL_023_N15	0.269429				0.318219	38.1234	-0.0436054	46.0931	-0.0580316	26.944		8
CC_OL_024_A06	0.105474		0.0394231		0.171217	38.1234	-0.156409	42.9187	-0.177222	27.0897	47.8336	8
CC_OL_024_B11	-0.130036		-0.0577417		0.35112	15.759	-0.280815	29.421	-0.215075	28.5389		8
CC_OL_024_D12	-0.0518804		0.159208		0.35727	15.759	0.270984	9.83518	0.295302	20.224	36.3277	8
CC_OL_024_G03	0.209155		0.0397498		0.172193	31.928	-0.15231	42.9187	0.875437	9.03094		8
CC_OL_025_E12	-0.302992		-0.221416	38.9184	-0.361712	8.60308	-0.296404	22.6047	-0.632044	1.77321	45.3265	8
CC_OL_025_J01	0.0753784		0.0678768		0.279584	31.928	0.59849	6.05121	-0.0245644	36.305		8
CC_OL_025_P15	-0.15399		-0.153737		0.0207287		-0.411071	2.49879	-0.577812	0	19.7688	8
CC_OL_025_P24	0.192336		0.178428		0.189524	31.928	-0.00713218		0.0882095	26.944		8
CC_OL_026_A18	-0.0509741		0.0771748		0.0106515		-0.100483		-0.0321848	30.7229		8
CC_OL_026_H08	-0.216824		0.251104		0.246424	31.928	0.0931928	35.5353	-0.272152	26.944		8
CC_OL_026_I21	0.0874149		-0.142449		-0.101386		-0.348093	16.9281	-0.2535	31.5418		8
CC_OL_026_L05	0.0812897				0.0133407				0.117245	20.224		8
CC_OL_026_L11	-0.65623	5.59812	-0.175824		-0.0332724		-0.277407	1.90836	-0.245243	29.9152		8
CC_OL_026_N09	-0.0879682		0.30988		0.190319	38.1234	-0.111218	46.0931	-0.490064	4.15931		8
CC_OL_026_N17	0.113307		0.243366		0.0331242		0.220277	13.6888	-0.0206405	32.952		8
CC_OL_027_A14	0.413115		0.727282		0.126436	31.928	0.510805	29.421	-0.0401429	20.224		8
CC_OL_027_B05	0.28858	45.4405	0.165763		0.0699886		-0.636449	0.470155	-1.02818	2.75661	0	8
CC_OL_027_F04	0.0320141		-0.0819944		-0.0883184		-0.31762	13.6888	-0.504252	28.5389		8
CC_OL_027_F06	0.027333	49.1692	-0.366424		-0.183022		-0.528735	0.584132	0.0170149	32.952		8
CC_OL_027_J09	-0.308465				-0.0942508		-0.198738	42.9187	-0.181494	27.0897	49.6822	8
CC_OL_027_M13	0.189406		-0.0563621		-0.0731457		0.228471	9.83518				8
CC_OL_027_N06	0.0896405		0.04945		0.0876245	38.1234	0.0806657	35.5353	-0.329789	27.0897		8
CC_OL_027_N16	0.1231				-0.0306844				-0.152463	30.7229		8
CC_OL_028_C06	0.107092		0.0812102		0.120825	31.928	0.161336	13.6888	0.109765	26.944		8
CC_OL_028_D05	0.040199		0.0675461				0.0216649	22.6047	-0.156469	36.2906		8
CC_OL_028_E16	-0.26124		-0.144952		0.064514		-0.667226	0.584132	-0.778579	27.0897		8
CC_OL_028_I21	0.109947		-0.147223		-0.0872574		-0.0410771	46.0931	-0.371061	26.944	41.5181	8
CC_OL_029_A06	0.106413		-0.0266851		0.0646176	38.1234	-0.0914669	49.5597	-0.222427	27.0897	23.4266	8
CC_OL_029_C20	-0.1309		-0.331559		0.084993		0.0506397	29.421	0.0171623	36.305	43.6613	8
CC_OL_029_O14	-0.659468	5.59812	-0.0648083		0.114257	43.057	0.269571	22.6047	-0.299676	26.944	37.9165	8
CC_OL_030_A13	0.368475	28.3192	0.121542		0.462343	31.928	-0.437911	16.9281	0.616103	5.00268		8
CC_OL_030_C08	0.352235		0.344369		0.121149	31.928	0.153691	9.83518	-0.589985	7.5619		8
CC_OL_030_F21	0.16691		-0.0850739		0.402696	31.928	0.23156	7.50597	0.158238	9.03094	31.3939	8
CC_OL_030_J12	0.0249249		-0.187907		0.0401947		-0.116685	47.8871	0.0247654	36.305		8
CC_OL_030_J13	0.529032	49.1692	-0.2311	38.9184	0.350224	31.928	0.115907		0.209297	9.03094		8
CC_OL_030_N14	0.20808	45.4405	0.50013		0.216989	31.928	0.269754	9.83518	-0.148177	27.0897	23.4266	8
CC_OL_031_A20	-0.326282	15.574	-0.149391		0.0474866		-0.143511	35.5353	-0.800769	1.1548		8
CC_OL_031_B15	0.10498	49.1692	0.00291681		0.340829	31.928	0.0499089		0.064677	20.224		8
CC_OL_031_E12	-0.517276	15.574	-0.307952		-0.364562		-0.116598	46.0931	-0.0561634	26.944	49.6822	8
CC_OL_031_H01	0.162446	49.1692	-0.543578	38.9184	0.461358	31.928	0.249796	9.83518	-0.095961	32.952		8
CC_OL_031_O22	0.194954		-0.0500284		0.00366484		-0.0268153	47.8871	-0.556494	27.4543	12.7645	8
CC_OL_031_P14	0.198182		0.0381616		0.177851	31.928	0.169048	13.6888	-0.261629	27.0897		8
CC_OL_032_C23	0.148994		0.0579531		0.158788	31.928	-0.0359104	47.8871	-0.507248	27.0897	49.6822	8
CC_OL_032_D13	-0.0276978		-0.282864	38.9184	0.490059	31.928	-0.198031	3.66522	-0.134017	29.9152		8
CC_OL_032_D23	0.343972		0.0734226		-0.0350036		0.179881	22.6047	0.0677834	36.305		8
CC_OL_032_I14	-0.0306009		-1.67791	17.1255	-0.458741	43.057	-0.46354	0.470155	-0.838056	27.0897		8
CC_OL_032_J12	-0.0587979		-0.0770977		0.0192917		-0.620333	0.584132	-0.54652	29.9152		8
CC_OL_032_L20	-0.0257804		0.122817		-0.126228		-0.012825	32.6536	0.184381	25.5212		8
CC_OL_032_N11	-0.228452		-0.507116	38.9184	-0.156661		-0.400655	22.6047	-0.585763	6.35742		8
CC_OL_032_O14	0.317064	31.7794	-0.0593055		0.154442	38.1234	0.0209508	32.6536	0.017764	26.944		8
CC_OL_033_A14	-0.480803	5.92376	0.138333		0.186784							8
CC_OL_033_G14	0.104111		-0.160399		-0.339988	31.928	-0.233882		-0.557617	26.9885	45.3265	8
CC_OL_033_K12	-0.225683		0.0237473		-0.19168		-0.540057	3.20256	-0.176664	32.346		8
CC_OL_033_K24	-0.41691		-0.702912	38.9184	0.154671		-0.511061	1.29953	-0.269729	36.305		8
CC_OL_033_L10	0.0964111	35.6136	0.0826224		0.104733		0.07936	22.6047	-0.072274	31.5418		8
CC_OL_033_L21	0.20258		-0.362697		0.257087	31.928	0.0914071	22.6047	-0.27407	31.5418		8
CC_OL_033_O08	0.0074974		0.222399		0.374209	15.759	0.30587	9.83518	0.213861	9.03094	43.6613	8
CC_OL_034_C18	0.0346425		0.00735045		0.189197	31.928	-0.161954	38.4179	0.0117345	36.305		8
CC_OL_034_E13	-0.488622		0.047514		-0.0019227		-0.679717	32.6536	-0.116017	32.346		8
CC_OL_034_E22	-0.382937	5.92376	0.0557944		0.171655	38.1234	0.0624786		-0.295073	28.5389		8
CC_OL_034_H13	-0.346299	21.354	-0.37811	38.9184	0.174373	38.1234	-0.179465	46.4495	-1.31893	0		8
CC_OL_034_H17	-0.106873		-0.628425	4.893	-0.429465	14.2796	-0.979697	0.470155	-0.753533	0.832354	10.1697	8
CC_OL_034_H20	-0.0614722		0.25501		0.0552076	43.057	-0.0191799		0.170604	20.224		8
CC_OL_034_I04					0.326992	31.928						8
CC_OL_034_N04	0.0225696		0.0285141		0.542142	31.928	0.193963	22.6047	0.14221	9.03094		8
CC_OL_035_B09	-0.21772		-0.66614	38.9184	0.571493	12.334	0.128108	42.9187	-0.111106	32.346		8
CC_OL_035_I15	0.157207		0.138516		-0.0689172		-0.337064	16.9281	-0.128374	36.305		8
CC_OL_035_J05	0.0541894		-0.0396041		-0.19136		0.259094	3.66522	-0.196909	27.9187		8
CC_OL_035_K20	-0.0413009		-0.224798	38.9184	-0.140293		-0.0770024	35.5353	-0.37105	3.10331		8
CC_OL_035_N02	0.0057267				0.0637204				-0.251292	29.9152		8
CC_OL_001_B12	0.0558117		-0.312729		0.101412	31.928	-0.423158	6.05121	-1.1415	2.75661	49.6822	9
CC_OL_001_J08	-0.0589306	49.1692	-0.183171		0.119575	38.1234	0.026292	32.6536	-0.602585	30.7229		9
CC_OL_001_K20	-0.475739		0.29535		0.251864	31.928	0.0493154	29.421	-0.161873	33.4832		9
CC_OL_001_O18	0.220458		0.130454		0.331435	15.759	-0.290453	13.6888	-0.105058	36.305		9
CC_OL_002_H18	-0.061367		0.12492		0.203715	31.928	-0.103662	46.7771	-1.64256	0	9.61028	9
CC_OL_002_M02	0.0861057		-0.0536417		0.200609	38.1234	-0.35404	46.0931	-0.391144	32.346		9
CC_OL_003_F07	-0.202258		0.0142659		0.35957	15.759	-0.0420904	49.3629	-0.229205	29.9152		9
CC_OL_003_F24	0.0132893		0.148847		0.114303	31.928	-0.206465	47.8871	-0.149521	32.346		9
CC_OL_003_G04	0.143877		-0.282142		0.0900711	31.928	0.0329304	22.6047	-0.521577	27.0897	19.7688	9
CC_OL_003_H14	-0.305069		0.146605				-0.203367	42.9187	-0.744778	4.15931		9
CC_OL_004_A17	-0.170757		-0.035444		0.118727	31.928	0.249363	22.6047	-0.0558763	30.7229		9
CC_OL_004_D24	0.120151		0.200003		-0.18476		-0.457445	4.8009	-0.943545	0.832354	5.81374	9
CC_OL_004_E04	-0.0664928		-0.352447	38.9184	-0.0781384		-0.0430753	49.3629	-0.167388	32.952		9
CC_OL_004_K01	-0.227484		0.325968		-0.0403378		0.115403	22.6047	-0.249168	25.5212		9
CC_OL_004_M17			-0.123433				-2.11458	0	-3.73519	1.1548	2.75387	9
CC_OL_005_G06	0.223634		0.297333		0.139424	31.928	-0.0129314		-0.26024	29.2273	41.5181	9
CC_OL_005_H18	0.124399		0.0971151		0.331855	31.928	-0.827378	2.49879	-2.35418	0	2.39689	9
CC_OL_005_J20	0.09395		0.102705		0.276295	15.759	0.08805	22.6047	-0.285847	29.9152		9
CC_OL_005_L09	0.314904		0.195924		0.344267	15.759	0.119543	13.6888	0.0327221	26.944		9
CC_OL_005_O06	-0.440065	31.7794	-0.315834		-0.328231	6.14359	-0.21962	44.7282	-0.14642	31.5418		9
CC_OL_006_A19	-0.0281849		0.00336287		0.133311	31.928	0.0450043	29.421	-0.102978	29.9152		9
CC_OL_006_D15	-0.146564		-0.160819	38.9184	0.307367	15.759	-0.205313	3.66522	-0.358784	32.346		9
CC_OL_006_O05	0.162604		-0.0888952		0.251903	14.2796	0.298349	4.8009	0.134416	20.224	45.3265	9
CC_OL_007_A12	-0.111806		-0.0314861		0.128856	38.1234	0.150187		0.146894	9.03094		9
CC_OL_007_B21	0.475649	41.8869	0.126496		0.508287	15.759	-0.202621	46.0931	-0.647874	27.4543		9
CC_OL_007_C06	0.420572	10.5894	0.387252		0.261306	31.928	0.0213347	29.421	0.10081	22.8514		9
CC_OL_007_D09	-0.131544		-0.47755	11.9735	-0.0278595		-0.128585	38.4179	-0.19252	36.305		9
CC_OL_007_E10			-0.0903741		0.734665	31.928	-2.10996	0	-3.67349	1.85298	3.54609	9
CC_OL_007_L15	-0.0216603		-0.479892	38.9184	0.169243		0.00769844	22.6047	-0.111368	27.0897		9
CC_OL_007_N22	0.0143431		-0.0688444		0.208868	31.928	0.108483	16.9281	0.311727	22.8514		9
CC_OL_008_E03	-0.0878409		-0.231728		-0.365639	46.6521	-0.186011	16.9281	-0.10132	31.5418		9
CC_OL_008_F02												9
CC_OL_009_C08	0.0343566		-0.38298	38.9184	0.0901051	43.057	-0.568812	0.584132	-1.69072	1.1548	5.26147	9
CC_OL_009_N08	-0.110293		-0.0938125		-0.108695		-0.17873		-0.700189	5.00268	37.9165	9
CC_OL_009_P02	-0.0834675		-0.097922		-0.0883863		-0.503661	0.584132	-0.377602	27.4543	31.3939	9
CC_OL_010_A05			-0.158082				0.288333	16.9281	-1.20512	26.944	31.3939	9
CC_OL_010_B03	0.0463752		0.0666195		0.227284	31.928	0.396389	4.8009	-0.268803	28.5389		9
CC_OL_010_H17	0.242446		0.048541		0.280016	31.928	-0.18085		-0.181938	29.2273		9
CC_OL_010_I01	-0.0430794		-0.105322		0.162802	31.928	-0.998754	0	-2.97661	0	0	9
CC_OL_010_L17	0.0754914		-0.110324		-0.127609		-0.212714	29.421	-0.227387	27.9187		9
CC_OL_011_C21	-0.0959432		-0.582746	38.9184	0.147134		-1.32661	0	-3.01077	0.856692	2.39689	9
CC_OL_011_E10	-0.0440191		-0.232468	38.9184	-0.314129		-0.891095	0	-0.826449	2.75661	29.4675	9
CC_OL_011_F22	0.104162		-0.171631	38.9184	0.128601	38.1234	-0.109748	38.4179	-0.671261	25.5212		9
CC_OL_011_L07	-0.204482		-0.400408		-0.089032		0.119342	16.9281	-0.387481	30.7229		9
CC_OL_012_A07	-0.0332968		0.290557		0.268484	31.928	-0.0851526	49.3629	-0.676161	5.47181	43.6613	9
CC_OL_012_C20	0.0819057		-0.0821469		0.151207	31.928	-0.0165006	49.3629	-0.349661	27.0897	43.6613	9
CC_OL_012_D06	-0.255481		0.107525		0.219786		-0.344347	3.66522	-1.46289	9.03094	6.12367	9
CC_OL_012_F10	-0.222009		0.0492457		0.442661	31.928	-0.231077	35.5353	-0.00230041	36.305		9
CC_OL_012_M19	0.244606		-0.158929		0.235592	31.928	-0.0538827	42.9187	-0.757581	5.00268	29.4675	9
CC_OL_012_N01	-0.0515112		0.397315		0.0583354		0.0462811	35.5353	-0.714472	27.4543		9
CC_OL_012_P01	0.0858244		-0.21745		0.0885012	43.057	-0.125504	49.5597	-0.484214	28.5389		9
CC_OL_012_P22	-0.256529	13.7761	0.0332229		0.19817	31.928	-0.902088	0.584132	-1.36699	6.35742	19.7688	9
CC_OL_013_J04	-0.626514	3.40911	0.100267		0.277434	31.928	-0.283195	13.6888	-1.49743	7.5619		9
CC_OL_014_G24	0.105883		0.21987		0.11195	38.1234	0.0067473	22.6047	-0.809908	26.944		9
CC_OL_014_I03	-0.119335		0.145676		-0.0979554		-0.437783	1.29953	-0.368752	25.5212		9
CC_OL_014_I04	-0.0287346		0.0967584		-0.166195	46.6521	-0.185287	46.4495	0.0835971	20.224		9
CC_OL_014_I06	0.00146965	49.1692	-0.071868		0.102304	38.1234	0.0515101		-0.0534251	35.1573		9
CC_OL_014_M01	0.173211		0.161144		0.474529	31.928	0.0861982	22.6047	-0.317821	29.2273		9
CC_OL_014_M05	-0.147545		0.313424		0.576775	14.2796	0.0528384	29.421	-0.591999	2.75661		9
CC_OL_014_M20	-0.348847		0.0230852		0.215801	31.928	-0.390514	40.8976	-0.337242	27.0897		9
CC_OL_015_A08	0.155199	35.6136	-0.34912	38.9184	0.0805672	31.928	0.00135006	40.8976	-0.0104932	36.305		9
CC_OL_015_B06	-0.31879	21.354	-0.15205				-0.0946533		-1.71547	6.35742		9
CC_OL_015_D05	0.357861	45.4405	-0.213034		0.416204	38.1234	0.22394	13.6888	-0.454737	26.9885		9
CC_OL_015_F07	0.0641717		0.404165		-0.844564	15.759	-0.218324	13.6888	-1.03543	0	12.7645	9
CC_OL_015_I06	0.0563861		0.305106		-0.0972026		-0.736035	0.584132	-1.5413	3.5488	2.75387	9
CC_OL_015_O16	0.0489427		-0.0994213		0.0471094		-0.124211		-0.134853	36.305		9
CC_OL_016_I02	0.224584		0.319936		0.141544	31.928	0.176221	49.3629	0.195949	3.10331		9
CC_OL_016_J03	-0.267156		-0.244333		0.400657	31.928	-0.26791	40.8976	0.0989058	36.305		9
CC_OL_016_K09	-0.0185332				-0.0919413		-0.0553025	47.8871	-0.558279	27.0897	49.6822	9
CC_OL_016_L23	0.358634		-0.0924996		0.195825	31.928	-0.115408	46.4495	-0.711907	9.03094	41.5181	9
CC_OL_017_C02	-0.271617	21.354	0.24994		0.362926	31.928	0.301779	22.6047	-0.199182	26.944		9
CC_OL_017_C18	0.0871475		-0.0859436		0.0975934	43.057	-0.0619706	46.0931	-0.481656	26.9885	34.6406	9
CC_OL_017_F11	-0.0347772		-0.143623		0.066153	38.1234	-0.0562014	49.3629	-0.0305381	36.305		9
CC_OL_017_F20	-0.110681		-0.116885		0.197117	31.928	0.00231439	29.421	0.095201	26.944		9
CC_OL_017_P18	-0.0208975		0.693527		1.04896	15.759	0.571161	3.20256	0.0976641	7.5619		9
CC_OL_018_A04	0.176196		-0.226917		0.290811		-0.420434	16.9281	-0.63144	26.944	14.3112	9
CC_OL_018_M10	0.245978		0.0141194		0.485964	31.928	-0.146827		0.0838122	36.305		9
CC_OL_018_N07	0.138094		0.155537		0.121411	43.057	0.0463937	49.3629	-0.322348	27.4543		9
CC_OL_018_O08	0.391697		0.194657		0.145529	31.928	-0.00449522	22.6047	-0.197417	28.5389		9
CC_OL_019_B06	-0.0624855		0.0783549		0.154234		-0.216944	47.8871	0.111368	20.224		9
CC_OL_020_D21	-0.263462		-0.196255		0.139953	38.1234	-0.28391	4.8009	-1.97189	0	10.1697	9
CC_OL_020_D22	-0.459051	22.8534	-0.957871	14.679	0.0587705	46.6521	-0.444205	16.9281	-0.695638	3.10331		9
CC_OL_020_G15	-0.173511		-0.111581		0.212424	31.928	-0.13724	47.8871	-0.468664	26.9885	45.3265	9
CC_OL_021_C08	0.26397		0.0568459		0.0213643		-0.120639	38.4179	-0.471097	27.4543	18.9075	9
CC_OL_021_E10	-0.394368	7.85391	-0.43136	38.9184	-0.373679	15.759	-0.179999	29.421	-0.215686	27.0897		9
CC_OL_021_F03	0.341439	41.8869	0.299139		0.359417	15.759	-0.0163948		-0.216107	27.4543	49.6822	9
CC_OL_022_C09	0.0236749		0.0570976		0.33613	31.928	0.0708203	35.5353	-0.182825	28.5389		9
CC_OL_022_E03	0.045387		-0.261464		0.179702	31.928	-1.05426	0	-1.39509	0.832354	0	9
CC_OL_023_C23	-0.139941		-0.473628	15.1433	0.0752877	31.928	-0.297775	0.584132	-0.292114	29.2273		9
CC_OL_023_F09	0.0344536		-0.0662645		-0.369921		-1.72369	0	-3.88169	0.924838	0	9
CC_OL_023_G18	0.24136		-0.0833025		0.329453	43.057	-0.118344		-0.362326	3.10331	36.3277	9
CC_OL_023_O23	-0.147597		-0.11686		0.192744	15.759	-0.0576889	46.7771	-0.412664	32.952		9
CC_OL_024_A02	0.136961		0.142301		0.128401	15.759	-0.0856285	44.7282	-2.78791	0.856692	3.82289	9
CC_OL_024_D18	-0.376866	19.5692	-0.43405		-0.100046		-0.000252151	42.9187	-0.132181	36.305	41.5181	9
CC_OL_024_G10	0.231507		0.127899		0.165974	31.928	0.0490515		-0.190606	27.0897	17.2576	9
CC_OL_024_P06	0.164526		0.0212058		0.0332063		0.106863	13.6888	-0.226884	6.35742		9
CC_OL_025_D20	-1.81067	41.8869	0.305813		0.776223	15.759	0.472959	4.8009	-0.294346	26.944	37.9165	9
CC_OL_025_F06	-0.171463		0.229342		0.257881	15.759	0.787341	9.83518	-0.33544	29.9152		9
CC_OL_025_H05	-0.197409		-0.0323787		0.0151236		0.180321	9.83518	-0.201901	34.3739		9
CC_OL_025_N08	-0.0103145		-0.0478374		0.528594	31.928	-0.0249635		-0.211978	30.7229		9
CC_OL_025_N13	-0.158643		0.0834198		0.71687	31.928	0.0447784		-0.0713858	27.9187		9
CC_OL_026_A10	0.138246	41.8869	-0.0716205		0.0900833	43.057	-0.0518162		-0.287369	30.7229	36.3277	9
CC_OL_026_D10	-0.114449		0.0196706		0.000356468		-0.132545	46.0931	0.0554388	26.944		9
CC_OL_027_E20	0.152397		-0.00709356		0.106254	31.928	0.0637687	46.0931	-0.282535	27.9187		9
CC_OL_027_H10	0.0644859		-0.107005		0.0997747	43.057	0.0737005	22.6047	0.256897	26.944		9
CC_OL_027_K15	0.00967117		-0.0769613		0.294922	31.928	0.00741569	46.0931	-0.470662	32.346		9
CC_OL_027_N04	-0.0222084		0.175122		-0.134461		-0.329756	40.8976	-0.284356	27.9187	29.4675	9
CC_OL_028_A20			-0.607156		-0.857895				-1.36177	25.5212	19.7688	9
CC_OL_028_B11	-0.0954386		-0.0804486		0.106236		-0.114293	29.421	-0.327033	33.4832		9
CC_OL_028_J16	-0.332303		0.232537		0.27924	31.928			0.022963	36.305		9
CC_OL_029_C04	0.271652	49.1692	0.349101		0.568294	1.44109	-0.163964	49.5597	-0.559718	27.0897		9
CC_OL_029_D15	0.281423	49.1692	0.264772		0.441532	31.928	-0.00540799	16.9281	-0.484848	3.10331	47.8336	9
CC_OL_029_K12	0.0582907		0.317802		0.93966	14.2796	0.169147	16.9281	0.216504	20.224		9
CC_OL_029_O15	0.248833	49.1692	-0.103031		0.0712755		-0.146379	47.8871	-0.350299	29.2273	27.7537	9
CC_OL_030_H22	0.0635194		-0.287722		0.420791	15.759	0.144052	22.6047	-0.0903888	36.305		9
CC_OL_030_L15	-0.280549	35.6136	-0.0145622	38.9184	-0.0343312		-0.813588	0	-1.0538	3.10331	45.3265	9
CC_OL_030_M11	-0.0870206		0.0554835		0.390159	38.1234	0.0376682	32.6536	0.164603	7.5619		9
CC_OL_031_A11	-0.198128		-0.110765		0.116444		-0.0382764		-0.256924	22.8514		9
CC_OL_031_C01	0.301787		-0.42674	38.9184	0.519346	31.928	-0.056708	46.0931	-1.42563	0.856692	34.6406	9
CC_OL_031_M24	-0.0718439		-0.149869		-0.00561087	43.057	-0.0478122	49.5597	-0.302456	32.952		9
CC_OL_031_N08	-0.397677	16.5889	-0.710133				-0.999248	0.470155	-4.95967	0	4.69886	9
CC_OL_032_A10	0.0852328		0.0672641		0.0959209	31.928	-0.583049	47.8871	-2.08344	0.832354	29.4675	9
CC_OL_032_D16	-0.257646		-0.18629		0.352396	15.759	-0.565151	0	-1.39743	2.75661	10.5994	9
CC_OL_032_H12									-0.385737	29.9152		9
CC_OL_032_I20	-0.0701615		-0.0778631		-0.0463451		-0.452528	22.6047	-1.2984	26.944	10.1697	9
CC_OL_033_B02	0.218668				0.126078		-0.245706	32.6536	-0.400651	27.0897		9
CC_OL_033_C04	0.19327		0.253503						-0.254567	27.9187	45.3265	9
CC_OL_033_E16	0.0387792		0.183164		0.0859465		0.084426	22.6047	-0.179493	31.5418		9
CC_OL_033_E22	0.208653		0.36589		0.388952	31.928	0.333269	9.83518	0.0832	22.8514		9
CC_OL_033_F12	0.131928		-0.164592		-0.0023207	38.1234	-0.422447	4.8009	-1.14118	5.47181	12.7645	9
CC_OL_033_G22	0.0350674		-0.0290664		0.0738316	38.1234	-0.111608	38.4179	-0.0356422	36.305		9
CC_OL_033_I09			0.0338714		0.0297042	46.6521	-1.38634	0.470155	-4.68529	1.5706	1.59793	9
CC_OL_034_D03	0.0837629		-0.0189568		0.376776	15.759	0.020627	9.83518	-0.0975226	31.5418		9
CC_OL_034_E15	-0.0412936		0.301922		0.38216	31.928	-0.385413	0.584132	-0.102566	30.7229		9
CC_OL_034_I22	-0.368587	19.5692	-0.185341		0.0858892	46.6521	-0.73314	0.584132	-2.33538	1.85298	10.1697	9
CC_OL_035_J03	-0.101869				0.0645646		0.166681	16.9281	-0.112107	36.305		9
CC_OL_001_A01												0
CC_OL_001_A02	-0.289273		-0.336368		0.216993	38.1234	-0.14066		-0.45454	9.03094		0
CC_OL_001_A03	-0.178138		-0.122861		-0.0455889		0.138467	16.9281	0.23859	9.03094	12.7645	0
CC_OL_001_A04	-0.463127	5.59812	-0.856806		-0.203212		-0.203815	16.9281	0.193452	9.03094	27.7537	0
CC_OL_001_A05	-0.116896		0.313805		-0.0288733		-0.496615	4.8009	0.352494	5.00268		0
CC_OL_001_A06	-0.0423196		-0.0582205		-0.2077	46.6521	-0.212798	42.9187	-0.0996086	29.9152		0
CC_OL_001_A07	0.0522902		-0.241084	38.9184	-0.132466		-0.509904	0	-2.0412	0	2.39689	0
CC_OL_001_A08	-0.337772		-0.199723		0.214811	38.1234	0.0419648	49.5597	0.438586	5.47181	23.4266	0
CC_OL_001_A09	0.0553685		-0.19193		-0.186763		0.0550756	32.6536	0.211006	9.03094		0
CC_OL_001_A10	-0.0948086		-0.0127375		0.171314	38.1234	-0.0738223	46.0931	0.234841	9.03094	43.6613	0
CC_OL_001_A12	0.173245		0.0967677		1.2547	1.44109	1.40343	0	1.17828	2.75107	4.23736	0
CC_OL_001_A13	-0.20214		-0.653202	7.9615	-0.355963	12.334	-0.669306	0.470155	-0.993428	1.5706	45.3265	0
CC_OL_001_A15	-0.0198413		0.0347622		-0.0706963		-0.0268283	49.5597	0.192123	20.224		0
CC_OL_001_A16	-0.384535	9.29258										0
CC_OL_001_A17	-0.468574	45.4405	0.277235		-0.366565	46.6521	0.0551968	35.5353	-0.127774	34.3739		0
CC_OL_001_A18	-0.0513053		-0.296206		-0.00935898	38.1234	-0.00584735	35.5353	-0.240725	29.9152		0
CC_OL_001_A19	-0.0701176		0.00233261		0.32519	46.6521	-0.14217	22.6047	0.0039645	22.8514		0
CC_OL_001_A20	-1.02335	24.3556	-0.173039		-0.011521		0.475352	7.50597	0.314241	2.36043	25.2603	0
CC_OL_001_A21	0.430591	31.7794	0.403023		0.252682	38.1234	0.323908	9.83518	0.506869	0.924838		0
CC_OL_001_A22	-0.0853723		0.220731		0.015358		-0.419026	0.584132	0.0290524	20.224		0
CC_OL_001_A23	-0.640616	31.7794	-0.113718						0.278863	20.224		0
CC_OL_001_A24	-0.229689	49.1692	-0.599607	11.9735	-0.253564	15.759	-1.08779	0	-1.49285	0	2.39689	0
CC_OL_001_B01	-0.338707		-0.00710502		-0.164413		-0.0390035	46.0931	0.137833	20.224		0
CC_OL_001_B02	-0.482206		-0.422415	38.9184	-0.0924504	38.1234	-0.0529439		0.35106	20.224	37.9165	0
CC_OL_001_B03	0.19163		0.31568		-0.0753051		-0.0368162	35.5353	-0.101331	36.305		0
CC_OL_001_B05	0.0808554		-0.00703636		0.126112	31.928	0.189039	32.6536	-0.160663	29.2273		0
CC_OL_001_B06	-0.244355		0.0300937	38.9184	-0.334356		-0.152085	46.0931	-0.307009	29.2273		0
CC_OL_001_B08	0.197582		0.224612		-0.0241027		-0.0872358		0.481758	2.75107	37.9165	0
CC_OL_001_B09	0.344103	21.354	0.239024		0.148541	31.928	0.282859	9.83518	-0.0612499	26.944		0
CC_OL_001_B10	-0.433469	7.85391	0.191658		0.0596947	46.6521	-0.286954	16.9281	-0.213047	28.5389		0
CC_OL_001_B11	-0.0289197		0.167284		-0.00203972		-1.19139	0	-0.49643	1.85298	47.8336	0
CC_OL_001_B13	0.080394		-0.157941		0.119756	31.928	-0.0229547		0.202769	7.5619		0
CC_OL_001_B15	0.0301512		0.564688		-0.144652		-0.137111	47.8871	0.00829732	22.8514		0
CC_OL_001_B17	-0.0360809		-0.263678	38.9184	-0.178004		-0.208892	46.7771	0.309447	20.224		0
CC_OL_001_B18	0.07273		0.17449		0.632394	31.928	0.539622	9.83518	0.274082	9.03094	34.6406	0
CC_OL_001_B19	0.00160591		0.194214		0.509361	15.759	0.260102	9.83518	-0.58669	30.7229		0
CC_OL_001_B20	0.106449	49.1692	-0.270818		-0.105716		-0.137829	47.8871	-0.110622	36.305		0
CC_OL_001_B21	-0.0745795		-0.143774		0.107092		-0.215692	3.66522	0.127744	20.224		0
CC_OL_001_B22	0.0347121		-0.0971521		0.0482106	46.6521	-0.0490059		0.0231021	9.03094		0
CC_OL_001_B23	-0.151847		0.0101734		0.0851665		-0.169265		-0.0217914	26.944	23.4266	0
CC_OL_001_B24	0.148881		0.272411		0.196757	31.928	0.0279219	49.5597	0.220848	9.03094		0
CC_OL_001_C01	-0.29156		-0.355614		0.0661042	46.6521	-0.0079417	35.5353				0
CC_OL_001_C03	-0.587747		-0.430816						-0.0537735	36.305		0
CC_OL_001_C04	-0.279429		-0.497949		-0.120145		-0.325059	1.90836	0.145848	9.03094	40.1778	0
CC_OL_001_C05	-0.0677387		0.184721		0.0131205		0.00650887	38.4179	-0.0832681	32.952	31.3939	0
CC_OL_001_C06	0.0833736		0.0243584		-0.0502771		0.0436486	46.0931	0.463594	5.00268	31.3939	0
CC_OL_001_C07	0.0819059		0.0550126		-0.114961		-0.192431	9.83518	0.166703	20.224		0
CC_OL_001_C08	0.0529257		0.208988		0.238847	31.928	-0.273269	35.5353	-0.81714	9.03094	23.4266	0
CC_OL_001_C09	0.121223		-0.082226		0.230534	38.1234	-0.101134	47.8871	-0.309105	31.5418		0
CC_OL_001_C10	-0.267749	25.6173	-0.211144		0.100623	38.1234	0.0344998	46.0931	-0.165221	32.346		0
CC_OL_001_C11	-0.114705		0.0577481		-0.0111674		0.0938392	16.9281	-0.0204924	20.224		0
CC_OL_001_C12	0.438239	28.3192	-0.0655373		0.140902	38.1234	-0.00485657	42.9187	0.0185238	20.224		0
CC_OL_001_C13	-0.0627315		-0.207941		0.0396018	31.928	0.0967679	29.421	-0.187624	32.346		0
CC_OL_001_C14	-0.44224		-0.421797	38.9184	-0.725604	3.78286	-0.50493	2.49879	0.351971	20.224	45.3265	0
CC_OL_001_C15	-0.0469274		-0.0989157		0.080517		-0.125416	46.4495	0.150798	20.224	47.8336	0
CC_OL_001_C16	0.332653	45.4405	0.288433		0.268707	31.928	0.345575	7.50597	-0.486794	28.5389	27.7537	0
CC_OL_001_C18	0.090636		-0.0339494		0.0298705	38.1234	0.0450642	22.6047	-0.192807	36.305		0
CC_OL_001_C19	0.0782392		-0.313398	38.9184	0.334166	14.2796	0.0464331	44.7282	-0.0652251	36.305		0
CC_OL_001_C21	-0.362894	9.29258	-0.362064		0.263817	31.928	0.169632	22.6047	-0.00607554	32.952	21.572	0
CC_OL_001_C23	-0.641715		-0.304932		-0.0674416		0.349206	16.9281	-0.201047	20.224	47.8336	0
CC_OL_001_C24	-0.0873847		0.0694614		-0.0297475		-0.104364	46.0931	0.0798599	20.224		0
CC_OL_001_D01					0.138549	38.1234	0.0879459	29.421	-0.172126	27.0897		0
CC_OL_001_D02	-0.114412		-0.00700398		-0.0155497		0.0375609	42.9187	-0.444204	29.9152		0
CC_OL_001_D03	0.087139		0.278916		0.567921	12.334	0.587018	7.50597	-0.889565	25.5212		0
CC_OL_001_D04	-0.329646	35.6136	-0.27385	38.9184	-0.289928		-0.330786	3.20256	0.473314	3.5488	19.7688	0
CC_OL_001_D05	0.0906284		0.139954		0.227496	38.1234	-0.000634366	44.7282	0.0169381	36.305		0
CC_OL_001_D07	-0.627449	2.46214	-0.261678	38.9184	-0.379155	8.60308	0.182344	9.83518	-0.138407	32.346	18.9075	0
CC_OL_001_D10			0.324439		0.0377201		0.0951141	29.421	0.0539719	20.224		0
CC_OL_001_D11			-0.200989		-0.253425		0.0473639	44.7282	-0.107545	36.305		0
CC_OL_001_D12	-0.290213	41.8869	0.132994		-0.0238886		-0.276985	49.3629	-0.159441	33.4832		0
CC_OL_001_D13	0.0562756		-0.180439		-0.0584452		0.250895	9.83518	0.433726	2.36043		0
CC_OL_001_D14	-0.149858		-0.12168		0.94357	9.9843	0.080085	9.83518	-0.367424	2.02696		0
CC_OL_001_D15	-0.0973528		0.00863083		0.0974206	43.057	-0.024374	35.5353	0.278372	9.03094	40.1778	0
CC_OL_001_D16	0.00849203		-0.0589267		0.19777	31.928	0.284996	9.83518	0.360889	1.85298	23.4266	0
CC_OL_001_D17	0.0797398		-0.00532275		0.00610507		-0.0809923	49.3629	0.00809859	25.5212		0
CC_OL_001_D18	-0.0340853	31.7794	-0.323593		0.00311562	43.057	-0.155237	46.0931	0.336044	9.03094		0
CC_OL_001_D19	0.173134		-0.121426		-0.062397		-0.322204	2.49879	0.104309	20.224		0
CC_OL_001_D20	-0.151962		0.174393		-0.0839392		-0.0787025	32.6536	0.257466	9.03094		0
CC_OL_001_D21	-0.175613	31.7794	-0.0818639		-0.0462421		-0.396588	47.8871	-0.0972217	20.224	31.3939	0
CC_OL_001_D22	-0.324402	13.7761	-0.327004		0.306946	38.1234	-0.053716	46.7771	0.511798	9.03094	19.7688	0
CC_OL_001_D23	0.683836	22.8534	0.211609		0.301219	15.759	0.137504	16.9281	0.758797	4.15931		0
CC_OL_001_D24	0.004875		0.310908		-0.222916		-0.0851699					0
CC_OL_001_E01	0.989337	31.7794	-0.00852474						-0.0425209	29.9152		0
CC_OL_001_E03			0.199634						0.0400162	31.5418		0
CC_OL_001_E06	0.206309	31.7794	0.411916		-0.204278		-0.506554	0.470155	-0.458183	29.9152	9.08296	0
CC_OL_001_E07	0.200003	49.1692	-0.254736	38.9184	0.164377	38.1234	-0.400062	46.0931	0.331982	9.03094		0
CC_OL_001_E08	-0.0517197		0.128374		-0.0285097		-0.415005	0.584132	-0.162335	28.5389		0
CC_OL_001_E09	-0.358627		-0.217596		0.0859444		-0.112828		0.0455382	20.224	21.572	0
CC_OL_001_E10	-0.112055		0.32878		0.483344	9.9843	0.194132	9.83518	0.190935	9.03094		0
CC_OL_001_E11	0.151349	35.6136	0.000819175		-0.243926		-0.107768	47.8871	0.602721	6.35742	41.5181	0
[truncated: 11,444 more rows]
