# Supplementary material for: Global Gene Expression in Coprinopsis cinerea Meiotic Mutants Reflects Checkpoint Arrest
Source: Oxford University Press journal article supplement (doi:10.1534/g3.112.003046), 2012-10-01
Supplement: 1213_tables4.xlsx [file 1213_tables4.xlsx]

## Sheet: Sheet1
Supplemental Table 4 Expression ratios and FDRs for msh5-22 vs. wild type comparison
For each probe, the log2 of the msh5-22/wild type expression ratio at each time point is given. This is the median ratio of the replicates and is only given if data were available from at least two replicates at that time point. All false discovery rates (FDRs) less than 50% are also listed for individual time points and the time-course analysis (genes with FDRs less than 5% were considered signi…
	K-3		K		K+3		K+6		K+9		K+12		time course
ID	log2(ratio)	FDR	log2(ratio)	FDR	log2(ratio)	FDR	log2(ratio)	FDR	log2(ratio)	FDR	log2(ratio)	FDR	FDR	cluster
CC_OL_001_H05	0.249792	10.3357	-0.254013	45.1357	0.2035	33.8404	0.0529406		0.187596		0.139551	33.2771		1
CC_OL_001_N24	0.308508	3.31382	-0.0519026		-0.0566625		0.1236	46.4198	0.243017	37.6844	-0.482687	18.8282	15.7073	1
CC_OL_002_D17	0.0718842	33.7527	0.205131		0.157995	46.9822	0.14774	46.4198	0.0285		0.26379	18.8282		1
CC_OL_002_E10	0.0905507	37.5172	0.157157		0.210207	42.2193	0.165214	46.4198	0.334955	42.1044	0.230698	22.3838	31.0409	1
CC_OL_002_G10	0.219522	8.31651	0.152192		0.0848141		-0.0401992		0.0550835		-0.316387	8.05179	5.93671	1
CC_OL_002_J04	0.361547	1.81504	0.177698		0.274307	20.3752	0.313715	19.9495	0.481713	37.6844	0.468909	22.3838		1
CC_OL_002_K09	-0.0513588		-0.123822		0.0560781		0.070062		0.153373		0.1165		48.4602	1
CC_OL_002_O22	-0.211555		-0.079996		0.144549	37.2031	-0.0155453		0.0573619		0.244916	9.83445	32.8143	1
CC_OL_003_C01	0.328947	8.31651	0.0751945		0.137114		0.367829	12.4531	0.073024		-0.205335	29.5603	24.012	1
CC_OL_003_H13	-0.0102785	40.8778	0.0638997		0.0526424		-0.0315421		-0.230254	42.1044	-0.35191	5.33638	5.07451	1
CC_OL_003_M03	0.212758	6.38553	0.155569		-0.0339374		0.192625	46.4198	0.190106		0.174558	18.8282		1
CC_OL_003_M14	0.579099	12.0207	0.072246		-0.227832	16.7058	-0.217533	26.4536	0.273919	42.1044			24.012	1
CC_OL_003_N22	0.0334315	37.5172	-0.0408806		0.262485	23.4001	0.321882	31.3506	0.200431	37.6844	-0.388445	29.5603	41.6943	1
CC_OL_003_P15	-0.152489	48.3647	0.186865		-0.0655255		-0.117134		-0.305924	42.1044	-0.0300991	37.1539		1
CC_OL_004_E01	0.368467	4.63086	0.128159		0.222057	18.2822	0.183464	49.7484	-0.260062	42.1044	-0.293065	49.9057	6.34878	1
CC_OL_004_G07	0.556179	6.38553	0.287535		-0.0531318		0.0563675		0.397189		0.277234	15.0033	29.2653	1
CC_OL_004_G11	0.496524	3.78856	0.417767		-0.0341093		-0.0503545		0.0267559		0.0224169	37.1539	12.5609	1
CC_OL_004_H01	0.129456	29.718	-0.0597707		-0.246543	46.9822	0.0716759		0.250008	37.6844	-0.217937			1
CC_OL_004_H06	0.277783	8.31651	0.0699788		0.130735		-0.075023		0.200396	42.1044	-0.00545272		38.2545	1
CC_OL_004_K20	0.10031	29.718	0.0671624		0.214533	26.8456	0.00460993		-0.0778334		-0.259718	25.9325	7.26894	1
CC_OL_005_H21	0.385599	8.31651	0.142461		-0.0465555		0.0159106		-0.134408	37.6844	-0.116086	49.9057	8.87849	1
CC_OL_005_L21	-0.000191591		0.0605621		0.375125	23.4001	0.0608346		-0.145563	42.1044	-0.408055	22.3838	22.1877	1
CC_OL_006_A14	0.452067	2.91035	0.503913		0.170334		0.143338		0.42928	34.569	0.0753482	44.0973	32.8143	1
CC_OL_007_H13	-0.15864		-0.209086	49.244	-0.176067	37.2031	-0.396359	19.9495	-0.346761	11.3424	0.0530535			1
CC_OL_007_K08	0.0524552	25.8116	0.318043		0.0269152		0.0600111		-0.0142499		-0.237046	18.8282	8.07623	1
CC_OL_008_E10	-0.203055	29.718	-0.199085		0.128918	46.9822	0.295756	22.1072	-0.131334	42.1044	-0.114065			1
CC_OL_008_E15	0.1085	29.718	0.0483806		-0.13715		0.0561669		-0.230787	16.4559	0.168425	25.9325		1
CC_OL_008_F09	0.082274	40.8778	0.092532		0.133451		0.105213	49.7484	0.0219324	46.4921	-0.0400828		17.0611	1
CC_OL_008_O19	0.117381	33.7527	0.00360954		0.250703	33.8404	0.177436	49.7484	0.237878	42.1044	0.319487	12.1023	46.6954	1
CC_OL_009_B09	0.13423	22.2561	0.0603392		0.0155334		-0.0234405		0.0733934		0.0553794			1
CC_OL_009_E10	0.261065	12.0207	0.0319327		0.126878	46.9822	0.0213623		0.297913	42.1044	0.084356	40.5623		1
CC_OL_009_F07	0.420692	15.9625	0.0872935		-0.00382402		0.00549868		0.41449	31.2984	-0.0692031		45.0807	1
CC_OL_009_K03	0.251964	6.38553	0.196606		-0.0546583		0.0180048		0.245703	37.6844	0.0273179		46.6954	1
CC_OL_010_H21	-0.0189011		-0.344988	37.0587	0.0934142		0.0474223		0.16427	46.4921	0.306884	12.1023	18.3434	1
CC_OL_010_H22	0.0635352	33.7527	0.378964	45.1357	0.147925		0.0344738		0.103767		0.0062448		24.012	1
CC_OL_010_I07	0.292638	12.0207	0.30976	49.244	0.101114		0.0127477		-0.0226219		0.0289979		5.93671	1
CC_OL_011_D09	-0.109861	15.9625	0.140087		-0.228923		-0.17878	31.3506	-0.0339372		-0.117707			1
CC_OL_011_F08	-0.0930871		0.0124871		-0.0531876		-0.0326373		-0.182869	26.3119	-0.292025	37.1539	12.5609	1
CC_OL_011_F20	0.0797048		-0.0531467		-0.0728271		-0.0747079		0.0779866		0.142621	25.9325	41.6943	1
CC_OL_011_F21	-0.0791818		-0.0144914		0.0570662		0.124977	38.5493	-0.22018		-0.0682893		32.8143	1
CC_OL_011_I10	0.269898	13.6381	0.0368653		-0.0385492		-0.16096		-0.335948	26.3119	-0.751999	0.363199	0.760804	1
CC_OL_011_I16	0.640436	2.32496	0.19278		0.133872		0.0725428		-0.0654445		-0.0911074		2.09221	1
CC_OL_011_N04	0.342334	19.0265	0.132309		0.102032		-0.117368	42.6069	-0.272781	26.3119	-0.263917	12.1023	5.93671	1
CC_OL_012_A17	0.635901	8.31651	0.0714022		-0.220857		-0.098773		-0.215169	46.4921	-0.0513599		20.8934	1
CC_OL_012_H21	0.120461	22.2561	0.134433		-0.152447		-0.145735		-0.177478	46.4921	-0.580189	15.0033	4.35452	1
CC_OL_012_M14	0.0332252	48.3647	-0.0544137		0.202546		0.240733	24.6475	0.215197		-1.4594	4.14154	10.2741	1
CC_OL_012_N11	-0.0044578		0.112121		0.0154494		-0.03662		-0.00641048		-0.127625		25.8284	1
CC_OL_012_N15	0.362434	2.10777	0.490628	31.8463	-0.0178321		-0.169544		0.0925907		-0.217112	37.1539	5.07451	1
CC_OL_013_G10	0.301103	2.91035	-0.093987		0.0171252		-0.0272194		-0.107496		-0.0458523		18.3434	1
CC_OL_013_J17	0.215076	19.0265	0.104675		0.115341	42.2193	0.0501885		0.0426942		-0.29391	29.5603	12.5609	1
CC_OL_013_P05	0.223662	10.3357	0.299632		0.253208		0.0681797		-0.0632507		-0.408248	5.33638	1.62381	1
CC_OL_014_C14	0.219288	22.2561	-0.0451618		0.216357	29.8948	0.075318		-0.583597	24.385	-0.354745	18.8282	18.3434	1
CC_OL_014_D06	0.4716	1.68564	0.411212	19.9555	0.240429	42.2193	-0.0621298		-0.0472954		0.0500609		1.62381	1
CC_OL_014_L06	-0.150638		0.0913796				0.0267573		-0.0821761		0.456964	12.1023	20.8934	1
CC_OL_015_C23	-0.251893	12.0207	-0.0194027		0.173112	42.2193	0.199878	24.6475	0.0473318		-0.287983	37.1539		1
CC_OL_015_E13	0.510449	2.32496	0.193797		-0.0871622		-0.0550216		-0.0654892		-0.257109		22.1877	1
CC_OL_015_E19	0.312772	5.5422	0.322112		0.300339		0.0168144		0.298239	42.1044	-0.0323303	47.0896	45.0807	1
CC_OL_015_F21	0.362115	7.17452	-0.0901293		0.102177		0.0814059		0.42064	26.3119	0.517074	5.33638	27.6504	1
CC_OL_015_G21	0.104099	37.5172	0.275222		0.125291	42.2193	-0.0400047		0.0951131		0.00905523	44.0973		1
CC_OL_015_N12	-0.108312		0.0683573		0.0732261		-0.0200757		0.237243	46.4921	0.101597	44.0973	49.9559	1
CC_OL_016_G03	0.231418	25.8116	-0.0328126		-0.205298	37.2031	-0.239706	17.4104	0.192698	37.6844	0.588915	8.05179	32.8143	1
CC_OL_016_G08	0.170722	33.7527	-0.0289649		0.320957	46.9822	-0.0393616		-0.123413	37.6844	0.03249		18.3434	1
CC_OL_016_J22	0.290435	19.0265	-0.0283426		-0.197085		-0.0784181		-0.19004	46.4921	0.364661	37.1539		1
CC_OL_016_O05	0.0484627		-0.01969		0.145186		0.0272526		0.237619		0.0270687			1
CC_OL_016_P04	0.0193085	44.9968	-0.189553		-0.12516		0.0600819		0.253512		0.541889	44.0973	36.5087	1
CC_OL_017_I10	-0.194323	10.3357	0.108024		-0.18763		-0.112683	49.7484	0.160936	46.4921	0.260801		31.0409	1
CC_OL_018_F11	0.215156	10.3357	-0.120537		-0.113917		-0.156581	31.3506	-0.106264		0.0354719			1
CC_OL_018_K09	0.205189	19.0265	0.0315428				0.00781254		0.623592	37.6844	0.347918	22.3838	45.0807	1
CC_OL_018_O24	-0.0341783		0.0200896		0.2009		0.146374		0.0106796		-0.0643918			1
CC_OL_018_P20	0.0838017	40.8778	0.0127212		0.130635	46.9822	0.0380346		-0.0280108		-0.47956	2.33695	3.38315	1
CC_OL_019_J22	-0.0773838		-0.288061	21.9863	0.0208566		-0.0948547		0.0505106		-0.0164433	47.0896	36.5087	1
CC_OL_020_D01	0.232123	22.2561	-0.00557415		-0.0316354		0.338928	49.7484	-0.647425	1.56915	-0.902606	1.07563	1.62381	1
CC_OL_020_L10	0.0447087	37.5172	0.135841		-0.0789216		0.0169998		0.0921791		0.167341	44.0973		1
CC_OL_021_C04	0.131269	29.718	0.206167		0.102686		0.0245857		-0.0793343		-0.291352	33.2771	4.35452	1
CC_OL_021_H04	0.358131	7.17452	0.207541		0.0908403		0.143635	42.6069	0.000738501		0.0734882		18.3434	1
CC_OL_021_H20	0.177779	29.718	-0.371718	31.8463	0.222487		-0.255557		0.226642		0.515918	37.1539	48.4602	1
CC_OL_021_P22	0.045926		0.00214572		0.101136		-0.0392157		-0.0401333		-0.29837	29.5603	19.7483	1
CC_OL_022_D13	-0.145766		0.0675296		0.164028		0.0358		0.57337	31.2984	-0.91525	0	38.2545	1
CC_OL_022_F05	0.296981	6.38553	0.162743		0.393507	23.4001	0.118264	49.7484	0.19178	46.4921	-0.351082	22.3838	5.93671	1
CC_OL_022_O05	0.0872003	33.7527	-0.100278		0.0714489		0.283981	49.7484	0.199283		0.20444	49.9057		1
CC_OL_023_B03	0.578688	2.32496	0.281747	49.244	0.104835		-0.0819913		-0.37094	16.4559	-0.0525279		0.760804	1
CC_OL_023_F06	0.324265	8.31651	-0.179142		0.16896		0.459797	26.4536	0.248406	34.569	0.502111	15.0033		1
CC_OL_023_I02	-0.295474	48.3647	-0.0621654		-0.0870706		-0.143603	26.4536	-0.670989	1.56915	-1.4422	0.227939	0.760804	1
CC_OL_023_J06	0.0325894		-0.20368	26.5964	-0.0284822		0.0183854		0.0777282		-0.110569			1
CC_OL_023_O01	0.193866	19.0265	-0.288834	49.244	0.210933	37.2031	0.205428	28.1875	0.191511		0.0651265			1
CC_OL_024_G02	0.387779	6.38553	0.0950942		-0.0743237		-0.00387587		-0.531604	14.9433	-0.228828	6.39063	19.7483	1
CC_OL_024_N15	-0.265875	29.718	-0.370658	45.1357	-0.206835		-0.397766	2.02637	-0.74599	1.23474	0.0360735		46.6954	1
CC_OL_024_P09	-0.000695244		0.177391		0.166944	46.9822	-0.168286	28.1875	0.0403475		-0.119825		25.8284	1
CC_OL_025_H06	-0.107726	37.5172	0.106877		-0.629483	4.28755	-0.818787	2.02637	0.0872531		0.175921	44.0973	46.6954	1
CC_OL_025_I01	0.441971	22.2561	-0.108722	45.1357	-0.377782	46.9822	0.0897951		-0.0805839	46.4921	0.189061	37.1539	49.9559	1
CC_OL_025_J17	0.255339	7.17452	-0.00626058		0.0913679		0.0942834	46.4198	-0.13976		0.0570657	49.9057	41.6943	1
CC_OL_025_K16	0.311381	7.17452	-0.0956709		0.00472005		0.137239	49.7484	-0.174965		-0.224922	22.3838	15.7073	1
CC_OL_025_K23	0.15075	25.8116	-0.0860228		-0.0626995		-0.118539		-0.168441	34.569	-0.231739	15.0033	7.26894	1
CC_OL_026_G23	-0.134372		-0.148593		-0.208092		0.0680538		0.192866	37.6844	0.0891376		27.6504	1
CC_OL_026_J21	0.188188	33.7527	0.212183		0.232217	23.4001	-0.0546		0.0285088		0.242861	12.1023		1
CC_OL_026_K17	0.308745	19.0265	0.382599		0.203643	37.2031	0.123665		0.0133312		0.333489	12.1023		1
CC_OL_027_C11	-0.0363381		-0.00167953		-0.0319311		0.103876	42.6069	-0.175317		-0.115789	40.5623	36.5087	1
CC_OL_027_M22	0.0807168		0.14601		0.0387467		0.0914019	49.7484	0.184999	42.1044	0.0808742			1
CC_OL_027_N07	-0.140372	40.8778	0.118705		0.209663	26.8456	0.0237141		0.116687	37.6844	0.0611744			1
CC_OL_028_E01	0.322579	29.718	0.00526421		-0.0695569		-0.129961		-0.0515158		-0.0259281		49.9559	1
CC_OL_028_E23	0.140848	12.0207	0.103236		0.0151993		-0.00727775		-0.215872	37.6844	-0.326503	18.8282	1.62381	1
CC_OL_028_H18	0.255487	5.5422	0.256101		0.127042	29.8948	0.0860923	46.4198	0.00793995		0.15817	22.3838	32.8143	1
CC_OL_028_I01	0.032993	29.718	0.276826		0.112119		0.0422045		-0.0447378		0.125053		40.0133	1
CC_OL_028_I09	-0.00736965		-0.176685		-0.137813		-0.0973376		-0.110638		-0.137812	29.5603	40.0133	1
CC_OL_028_J11	0.395369	5.5422	0.19435		0.139203	46.9822	-0.0213565		0.0957234		0.023139		8.87849	1
CC_OL_028_K18	0.200572	19.0265			0.0595756		-0.0379704		-0.0212166		-0.0764603		27.6504	1
CC_OL_028_O03	0.48729	2.10777	0.310557		0.279495	23.4001	0.0597827	49.7484	0.186724		-0.0775554		8.87849	1
CC_OL_029_C14	-0.019189	44.9968	-0.0666526		0.07544		0.102188		-0.117199		-0.461663	12.1023	10.2741	1
CC_OL_029_E24	-0.0124847		0.127686		0.0883986	46.9822	0.06967		0.107319		0.0966416	49.9057		1
CC_OL_029_F06	0.0504285	33.7527	0.377336		0.341754	23.4001	-0.236373		0.166545	42.1044	-0.167851	29.5603	25.8284	1
CC_OL_029_G06	0.233405	10.3357	-0.0110177		0.0417245		-0.0752967		0.156807		-0.202614	40.5623	15.7073	1
CC_OL_029_O20	-0.0128333		-0.149632		-0.0882257		-0.0345449		-0.219389	37.6844	-0.0964463		49.9559	1
CC_OL_030_J11	0.325132	4.63086	0.129564		-0.0623799		0.0350949		0.252333	37.6844	-0.00992922		8.87849	1
CC_OL_030_J19	0.246574	25.8116	0.0684853		0.00587229		0.223486		-0.462563	14.9433	0.453727	12.1023		1
CC_OL_030_O08	0.114053	33.7527	-0.171918		-0.401168	9.15258	-0.194799	26.4536	0.0228093		0.162388	18.8282		1
CC_OL_031_H07	0.307946	2.91035	0.170851		-0.0425498		0.0803799		-0.393696	26.3119	-0.00190533		8.87849	1
CC_OL_031_H18	0.148236	40.8778	-0.0212258		-0.135472		-0.22609	34.9677	0.165307	42.1044	0.152237	47.0896		1
CC_OL_031_J23	0.373908	6.38553	0.217018		0.118823		0.197356	28.1875	0.211731		-0.0503265		18.3434	1
CC_OL_031_N15	0.000731613		0.167689		0.186373		-0.00771298		0.300873	42.1044	0.0235743	37.1539		1
CC_OL_032_C12	0.0333827	25.8116			0.366474	46.9822	-0.160796	34.9677	-0.0921024		0.139852	40.5623		1
CC_OL_032_E16	0.232906	10.3357	0.043129		0.144278		-0.00534039		-0.485439	24.385	-0.07553		29.2653	1
CC_OL_032_G08	-0.409063	6.38553	-0.839347	3.77277	-0.822162	1.8358	-1.01964	0	-0.614282	11.3424	0.157216		36.5087	1
CC_OL_032_J13	0.0646521	25.8116			0.450367		-0.270778	10.4046	0.899044	28.6663				1
CC_OL_032_L17	-0.0820268		-0.303357		-0.245167	42.2193	-0.401341	7.8752	-0.507657	6.05829	-0.0408077			1
CC_OL_032_O22	0.268797	19.0265	0.118945		0.0350475		0.0766054		-0.257288		0.0547732		14.3906	1
CC_OL_033_B03	0.359119	4.63086	0.388746		-0.00360322		0.16914	38.5493	0.0578592	42.1044	-0.347211	4.14154	3.97255	1
CC_OL_033_C06	0.276291	10.3357	0.0591608		0.00679626		0.199138	38.5493	0.0856991		-0.408461	2.33695	4.35452	1
CC_OL_033_N10	0.404201	10.3357	0.000963282		0.0754386		-0.174145		0.128028		0.232279	40.5623		1
CC_OL_033_P15	0.24697	19.0265	0.0504457		0.189901		0.235362	17.4104	0.0980307		-0.475531	18.8282	8.87849	1
CC_OL_034_A05	0.126809	37.5172	0.0445483		-0.294857	14.9963	-0.209058	38.5493	-0.222734	46.4921	0.151445		29.2653	1
CC_OL_034_A06	0.19943		0.000956911		-0.0774553				0.145432					1
CC_OL_034_C06	0.0219421		0.239943		0.0880278		-0.218623		0.138263		0.0608815	49.9057		1
CC_OL_034_G20	0.102221	40.8778	-0.0491071		-0.114473		0.0310406		-0.092864		-0.365272	12.1023	18.3434	1
CC_OL_034_J11	-0.0201082		-0.0290068		-0.120331		0.0103304		-0.200919	12.7329	-0.341635	33.2771	17.0611	1
CC_OL_035_E09	-0.122527		-0.108478		0.0976812		0.0991558		0.360957	34.569	0.390487	33.2771	27.6504	1
CC_OL_001_C20	-0.23479	22.2561	-0.077636		-0.23912	7.65896	-0.22634	26.4536	-0.900482	0	-1.48823	0.541822	1.62381	2
CC_OL_001_F08	0.0395965		-0.0978769		-0.152418	46.9822	-0.144587	49.7484	0.170391		-0.324644	3.31894		2
CC_OL_001_H13	0.095412	48.3647	-0.0643548		0.0469167		-0.20684	22.1072	-0.091524		-0.404344	25.9325	12.5609	2
CC_OL_001_H23	0.00580799		-0.090977		0.242795		0.177189	49.7484	0.189176	42.1044	-0.0386231		49.9559	2
CC_OL_001_O15	0.054547	48.3647	-0.141709		0.0285061		0.153431	38.5493	-0.0648931		0.270563	18.8282	45.0807	2
CC_OL_001_O20	0.229739	10.3357	-0.148306		0.172654	46.9822	0.16529	31.3506	-0.0861325	31.2984	0.358061	12.1023		2
CC_OL_002_B24	0.0396917	48.3647	0.0792397		-0.264843	42.2193	-0.0975519		0.200866		0.214593	15.0033	43.4785	2
CC_OL_002_C11	-0.0430954		-0.105437		0.0490195		0.0373799		-0.183788	31.2984	-0.742198	1.07563	3.38315	2
CC_OL_002_G04	0.0832496	25.8116	0.0645938		0.15039	46.9822	0.339446	15.5702	-0.523715	4.43055	-0.0850909	37.1539		2
CC_OL_002_J23	0.133417	25.8116	0.116788		0.100963		0.182813	31.3506	-0.174469	46.4921	-0.39151	15.0033	4.35452	2
CC_OL_002_O11	-0.278468	10.3357	-0.135267	40.2379	0.151239		0.12347		0.1058		-0.00307973		29.2653	2
CC_OL_002_P03	-0.0341786		0.0116608		0.299502	14.9963	0.278176	28.1875	-0.0186613		-0.289073	49.9057	38.2545	2
CC_OL_002_P19	-0.13159		-0.0434252		0.132111	42.2193	-0.13707		-0.00687067		0.119886			2
CC_OL_003_C14	-0.557736	10.3357	-0.203161		0.387333	6.72025	0.47383	3.9376	0.4635	24.385	0.308234	9.83445	7.26894	2
CC_OL_003_F23	-0.146123	15.9625	-0.00977965		0.0822673		0.139719	28.1875	0.315596	46.4921	-0.0245042	49.9057	29.2653	2
CC_OL_003_G14	-0.308873		-0.171006		0.278164	18.2822	0.182525	34.9677	-0.221162	46.4921	-0.211014			2
CC_OL_003_J12	0.359452	2.32496	0.0570956		0.181681	37.2031	0.247822	38.5493	0.14147		-0.0494442		38.2545	2
CC_OL_003_J19	0.155181	37.5172	0.17729		0.0701153		0.240487		-0.190333		-0.0134891	47.0896	49.9559	2
CC_OL_004_C11	-0.0572219		-0.144194		0.0592128		-0.0189448		0.057904		0.209402	29.5603	29.2653	2
CC_OL_004_C18	0.401205	1.81504	0.0413074		0.0879277		-0.0114246		-0.104211		0.231661	18.8282	32.8143	2
CC_OL_004_C21	-0.000387455		-0.0659429		0.0781996		-0.00595562		-0.0332371		0.0490936	40.5623		2
CC_OL_004_P20	-0.124044		-0.304627		0.230812	37.2031	0.095695	46.4198			-0.30378	40.5623	27.6504	2
CC_OL_005_C12	0.187483	19.0265	-0.16704		-0.0885165		0.000272359		0.103624		0.483752	9.83445	29.2653	2
CC_OL_005_E17	0.461193	8.31651	0.0709004		0.111703		0.0790929		0.180505	42.1044	-0.668159	3.31894	8.07623	2
CC_OL_005_E18	-0.0248613		-0.315365	40.2379	0.184483		0.00999606		-0.0646814		-0.0732569			2
CC_OL_005_F06	0.062814		0.137097		0.290149	18.2822	0.169465	31.3506	-0.0474505		0.234882	25.9325		2
CC_OL_005_G19	0.0736588		0.0767		0.182455	37.2031	-0.0248425		0.04254		-0.142847		45.0807	2
CC_OL_005_G20	0.293764	15.9625	-0.0931536		0.0374024		-0.0517397		-0.290715	37.6844	-0.667215	0.227939	2.09221	2
CC_OL_005_P04	-0.0205452		-0.437641	1.23473	0.195683		0.215808		0.277138	37.6844	-0.256126		40.0133	2
CC_OL_006_C16	-0.243106	25.8116	-0.393271		0.128622	42.2193	0.155038	42.6069	-0.0658171		0.0470598		34.526	2
CC_OL_006_D05	0.117225	25.8116	0.24661		0.0779195		0.0436135		0.0376038		0.107746		19.7483	2
CC_OL_006_E10	0.223245	40.8778	-0.350044		-0.0438565		-0.00491907				0.154487			2
CC_OL_006_G02	0.0632165		-0.165819		-0.0810892		0.234333		-0.331206	14.9433	-0.149299		43.4785	2
CC_OL_007_F08	-0.142216	44.9968	-0.129404	49.244	0.143465		0.13498		-0.0149251		-0.178265	37.1539		2
CC_OL_007_F13	-0.286478	7.17452	-0.106531	45.1357	-1.12353	0	-0.545903	31.3506	-0.485263	14.9433	-0.0640652		41.6943	2
CC_OL_007_G03	0.121261	40.8778	0.0013392		-0.0677322		-0.208048		0.182079		0.04266			2
CC_OL_007_I04	0.187547	6.38553	0.11045		0.103051	37.2031	0.15339	38.5493	0.104406		-0.146201		20.8934	2
CC_OL_007_J23	-0.0416441		0.192618		0.0416033		0.0817766		-0.229609	16.4559	-0.133297	15.0033	14.3906	2
CC_OL_007_L07	-0.0140566	48.3647	-0.0986846		-0.0720505		0.0282477		-0.161171	34.569	0.0736651		46.6954	2
CC_OL_007_M20	0.0203075		0.00676753		0.196016	42.2193	0.14205	42.6069	-0.0192029		0.238618	12.1023	43.4785	2
CC_OL_008_A03	0.193987	13.6381	0.109624		-0.084751		-0.049761		0.032992		0.00959281		36.5087	2
CC_OL_008_F17	-0.0322096		-0.0644471		0.286555	29.8948	0.132882	42.6069	0.271699	37.6844	0.318794	25.9325	40.0133	2
CC_OL_008_G04	-0.115906		-0.27068	49.244	0.0238734		0.0786281		0.236547		-0.324677	49.9057		2
CC_OL_008_G15	-0.0247465		-0.0415465		-0.0407609		0.0654785		-0.193955		-0.0961901			2
CC_OL_008_K16	-0.0391392		0.161828		0.243492	46.9822	0.261634	12.4531	-0.343564	21.4061	-0.113209		46.6954	2
CC_OL_008_L08	-0.0344523		0.207793		0.0645575		0.0526156		0.050919		0.105969			2
CC_OL_008_M10	-0.0201992		0.00136606		0.0184858		-0.00616631		0.0815645		-0.139158			2
CC_OL_009_B13	-0.0603601		-0.203513		0.110301		0.158454	38.5493	0.0795456		0.315004	15.0033	20.8934	2
CC_OL_009_E01	-0.11141		-0.0716507		0.355546	29.8948	0.269942	31.3506	0.103207		0.228062	22.3838		2
CC_OL_009_G01	-0.126025		0.0588655		0.101302	46.9822	0.17343	49.7484	-0.472823	6.33755	-0.803958	1.35943	4.35452	2
CC_OL_009_I01	-0.764863	0	-0.613724	2.20248	-0.00700167		0.0931129		-0.561812	6.05829	-0.0396562		27.6504	2
CC_OL_009_I22	-0.0644487		0.0546357		0.0454541		0.0932932		0.0176521		0.0333827	40.5623		2
CC_OL_009_J20	-0.82554	19.0265	-0.232972		0.0741459		0.0672783		0.0716531		-0.0701993		22.1877	2
CC_OL_009_N18	-0.169445		-0.267099	37.0587	-0.193709		-0.196763	34.9677	0.104397		-0.185176	47.0896		2
CC_OL_009_P10	-0.0110201		-0.238707		0.130036		0.0199761		-0.0868731	37.6844	-0.0093389		45.0807	2
CC_OL_010_M22	-0.290015	15.9625	-0.39207		-0.299131	13.5015	-0.330862	7.8752	-0.113975		-0.425865	6.39063		2
CC_OL_010_P19	0.200632	25.8116	0.0751604		0.0869932		-0.0130164		-0.105679		-0.552048	12.1023	2.84897	2
CC_OL_011_A05	-0.228554	13.6381	-0.0455215		-0.0841738		0.105292		0.161291	46.4921	-0.235994	25.9325		2
CC_OL_011_C07	0.0709478	48.3647	0.146719		0.0990848		0.0460146		-0.186185		0.0653883	49.9057		2
CC_OL_011_G03	-0.0281866				0.0693933				0.0479427		0.250954	12.1023		2
CC_OL_011_G13	-0.12124		-0.19956		-0.160125		-0.128064	49.7484	-0.126092		-0.321333	2.33695	34.526	2
CC_OL_011_J02														2
CC_OL_011_M13	-0.20207		-0.00268162		0.0270252		-0.00418067		0.070908		0.0817246	37.1539		2
CC_OL_011_M15	0.0150155		-0.602124	17.2634	0.41576	29.8948	0.0624533		0.0742784		-0.3937	25.9325	40.0133	2
CC_OL_011_N24	-0.374245	10.3357	-0.136151		0.10715		0.0745203		0.204283	37.6844	0.190414	47.0896	17.0611	2
CC_OL_011_O15	-0.107069		-0.0645299		0.0853364		0.0320395		-0.176629		-0.876644	2.33695	10.2741	2
CC_OL_012_B02														2
CC_OL_012_C15	-0.179776	37.5172	0.00949588		0.139922		-0.0325755		-0.592613	4.43055	-0.784439	0.363199	5.07451	2
CC_OL_012_F13	-0.433174	19.0265	-0.600029	13.9394	0.028745		-0.0432169		0.707734	42.1044	0.755212	8.05179	8.07623	2
CC_OL_012_G04	0.196961	22.2561	0.114885		0.279446	26.8456	0.069548		0.00218763		-0.242895	15.0033	11.557	2
CC_OL_012_G15	0.174918	40.8778	-0.110582		0.0461358		-0.0120377		0.182102		-0.235676	18.8282	32.8143	2
CC_OL_012_H03	0.0735378	29.718	0.0568991		0.214391	33.8404	0.173038	38.5493	0.108066		-0.386818	2.6814	12.5609	2
CC_OL_012_J01	0.207755	19.0265	0.0471897		-0.00196307		0.152215	42.6069	-0.0802387		0.0786355		34.526	2
CC_OL_012_J14														2
CC_OL_012_M09	-0.104132	33.7527	0.0307837		0.0325916	46.9822	0.105452	46.4198	0.0648286		0.129672		38.2545	2
CC_OL_012_O15	0.168968	15.9625	0.193263		0.07764		0.147122	28.1875	0.32737	42.1044	-0.430062	8.05179	15.7073	2
CC_OL_012_P02	-0.167615	15.9625	-0.237554	28.7086	-0.207757	33.8404	-0.173055	28.1875	0.0535952		0.0287624		43.4785	2
CC_OL_013_B15	-0.15075	48.3647	-0.133649		0.109544		0.219548		0.110286	37.6844				2
CC_OL_013_E07	-0.015853				0.0990694		-0.0811888		-0.286967	37.6844	-0.136151	37.1539	25.8284	2
CC_OL_013_E08	-0.0801978		-0.0124855		-0.00472766		0.0182756		-0.213385	42.1044	-0.00520729	40.5623		2
CC_OL_013_H01	-0.398295	19.0265	-0.0714446		-0.210846	16.7058	-0.152674	34.9677	0.475343	42.1044	0.394794	44.0973	34.526	2
CC_OL_013_O08	-0.010092		-0.027209		0.128072	33.8404	-0.0137655		0.0544225		-0.0332065			2
CC_OL_013_O19	0.207583	33.7527	0.0693601		0.0316016		-0.0223113		-0.47161	8.3482	-0.289721	18.8282	2.84897	2
CC_OL_013_P01	-0.119868	37.5172	0.180942		-0.0333338		-0.114265	38.5493	-0.203548	31.2984	-0.143584	37.1539	32.8143	2
CC_OL_014_C22	-0.0226563		-0.0698983		-0.114662		-0.0256572		-0.0618231		-0.253063	49.9057		2
CC_OL_014_F24	0.0170494	33.7527	-0.0233985		0.0381453		-0.171872	31.3506	-0.351198		0.631287	15.0033	38.2545	2
CC_OL_014_H18	0.0191918		-0.0457289		-0.0978669		-0.11799		0.408161	42.1044	0.125115	12.1023	27.6504	2
CC_OL_014_I05	0.225673	10.3357	-0.0267783		0.148358		0.076425		0.172935	37.6844	0.199682	18.8282		2
CC_OL_014_I16	-0.0279549		0.0772268		-0.133707		-0.145333		0.0598327		0.633953	18.8282	32.8143	2
CC_OL_014_J04	-0.417794	4.63086	-0.205739		0.35724	18.2822	0.278724	15.5702	-0.299416	19.8042	-0.322962	5.33638		2
CC_OL_014_L05	0.224989	22.2561	0.0130105		0.332488		0.168953	49.7484	0.0906612		0.243071	15.0033		2
CC_OL_014_O12	0.0381536	44.9968	-0.0592217		-0.0137384		0.0739826		-0.0959131		0.108673	37.1539		2
CC_OL_014_P06	0.397517	2.2718	-0.155972		0.110895		-0.033215		-0.0933873	37.6844	-0.0955487		8.07623	2
CC_OL_015_B18	0.319754	13.6381	0.244685		-0.0283066		0.0848249		0.409983	37.6844	0.121981	33.2771		2
CC_OL_016_B22	0.158449	22.2561	0.101738		0.25873	23.4001	0.152723	34.9677	0.1991	42.1044	0.135136	33.2771		2
CC_OL_016_D09	-0.13307	37.5172	-0.124616		0.419507	9.15258	0.247028	31.3506	-0.0202283	42.1044	0.203751	44.0973		2
CC_OL_016_E18	0.190411	15.9625	0.156109		0.236374	46.9822	0.0615473		0.0858159		0.0404974			2
CC_OL_016_H13	-0.472156	22.2561	-0.302419		-0.0510311		0.310386	34.9677	0.131288		-0.531193	22.3838	45.0807	2
CC_OL_016_J14	0.188138	25.8116	0.2428											2
CC_OL_016_L09	0.0921151	29.718	0.187807		0.151147		0.150334	46.4198	-0.170045	46.4921	0.02311		36.5087	2
CC_OL_017_B16	-0.0450403		-0.101532		-0.13192	16.7058	-0.111063		-0.0016019		-0.141629	40.5623	49.9559	2
CC_OL_017_D14	0.253999	48.3647	0.0725552		0.0493153		0.0396298		-0.102472		-0.230436		29.2653	2
CC_OL_017_J02			-0.364703	45.1357	-0.195138						0.533259	15.0033		2
CC_OL_017_J23	-0.230383	29.718	-0.172361	45.1357	0.259185	14.9963	0.273457	31.3506	-0.0101249		0.267547		40.0133	2
CC_OL_018_B04	0.223617	25.8116	0.0880564		0.281006		0.215158	28.1875	0.180801	34.569	0.39102			2
CC_OL_018_D01	0.426004	29.718	0.459106		0.214311	33.8404	0.00362184		0.338602	37.6844			24.012	2
CC_OL_018_M04	0.146692	25.8116	0.225427		-0.224847		-0.13781	34.9677	-0.276075	37.6844	-0.111682	44.0973	10.2741	2
CC_OL_019_H08	-0.153599		0.0388519		0.155712	42.2193	-0.0193874		-0.221531	46.4921	-0.00447139			2
CC_OL_019_J10	-0.306251	48.3647	-0.0985702		-0.164799		-0.174675	31.3506	0.116457		0.13813	49.9057	27.6504	2
CC_OL_019_K01	-0.185289		0.0274012		0.143713		0.181091	49.7484	0.0224195		-0.129088			2
CC_OL_020_F21	-0.117001		-0.0942226		0.0262987		-0.0175288		-0.0526167		-0.419413	6.39063	27.6504	2
CC_OL_020_P16	-0.0135136		-0.0756839		-0.0425078		0.101717		-0.0445649		0.142801	25.9325	40.0133	2
CC_OL_021_B02														2
CC_OL_021_B11	0.0783146	48.3647	-0.112166		0.204119	42.2193	0.0589439		0.133354	37.6844	0.481784	12.1023	20.8934	2
CC_OL_021_E01	-0.245858	13.6381	0.0986791		0.248209	20.3752	0.228971	46.4198	0.014678		-0.0769535		48.4602	2
CC_OL_021_F02														2
CC_OL_021_I21	0.238804	29.718	0.272409		0.00673949		-0.0506263		0.140981		-0.0829314		24.012	2
CC_OL_021_I24	0.104084		-0.0768824		-0.211453	37.2031	-0.187867	22.1072	0.142451	46.4921			25.8284	2
CC_OL_021_K02	-0.061332		-0.000584942		0.287784	23.4001	0.337337	17.4104	0.324855	37.6844	-0.318222	33.2771		2
CC_OL_021_L15	-0.0550572		-0.134992		0.00707274		0.0523302		-0.559641	7.15844	-0.463473	12.1023	8.07623	2
CC_OL_021_M24	-0.0574196		-0.163809		0.128111	46.9822	-0.0400217		-0.11793		-0.00247456			2
CC_OL_021_O05	-0.637303	25.8116	0.0193746		-0.0243225		0.210929	49.7484	-0.0777352		-0.221925	44.0973	45.0807	2
CC_OL_021_P24	-0.629616	1.85743	0.0705431		0.0853836		0.190135	49.7484	0.430756	34.569	0.383294	18.8282	2.84897	2
CC_OL_022_N05	-0.534161	19.0265	-0.202019		-0.114996		-0.194741	34.9677	-0.292024	34.569	-0.254155		43.4785	2
CC_OL_022_N15	-0.0906599		-0.123066		0.136679	37.2031	0.238509	26.4536	0.158105				17.0611	2
CC_OL_023_C05	-0.0482406		-0.22308		-0.0037078		0.00628191		-0.0909062		0.107246			2
CC_OL_023_F01	0.211865		-0.0647998		0.101668		0.0218163		-0.243765	21.4061	0.303185	37.1539		2
CC_OL_023_H04	0.0212927		-0.181644		0.335655	29.8948	0.245911	26.4536	-0.0554249		-0.377707	9.83445	29.2653	2
CC_OL_023_H23	-0.0384508		-0.177513		-0.106415		-0.163609		0.0370411		0.177838	37.1539	36.5087	2
CC_OL_023_I23	-0.244571	12.0207	-0.0513453		-0.159576		-0.276774	12.4531	0.00771173		-0.238163	47.0896		2
CC_OL_023_K11	0.00216255		-0.0470374		0.0985793		-0.32858		0.349473	37.6844	0.307371	22.3838	31.0409	2
CC_OL_023_N04	-0.0515075	22.2561	-0.054313		-0.0275148		-0.224944	34.9677	-0.00981203				22.1877	2
CC_OL_023_O02	0.0822298	29.718	-0.252576		-0.0166403		-0.0438385		-0.480526	31.2984	-0.510065	3.31894	11.557	2
CC_OL_024_A16	-0.0397448		-0.366376	11.3554	0.326429		0.187708		-0.0297191		-0.410437	40.5623		2
CC_OL_024_L15	0.208737	15.9625	0.405378		-0.177293		-0.0474266		-0.125037		-0.203166	33.2771	8.87849	2
CC_OL_024_O08	-0.381905	29.718	-0.0470291		0.3311	23.4001	0.110011		-0.163162		0.0751494	47.0896	41.6943	2
CC_OL_024_P04	-0.197921	29.718	-0.201541	49.244	-0.398923	9.15258	-0.475994	0	-0.796553	5.53818	-0.504426	4.14154	10.2741	2
CC_OL_024_P07	0.194539	44.9968	-0.0812766		0.119885	26.8456	-0.274911	38.5493	0.108875		-0.00686388	44.0973	32.8143	2
CC_OL_025_B02			-0.0134428								-0.500329	15.0033		2
CC_OL_025_B05	-0.494137	13.6381	-0.0633477		0.248754	26.8456	0.0473872		0.225918	37.6844	-0.112881		25.8284	2
CC_OL_025_G06	-0.0814528		0.00629115	37.0587	0.195671	46.9822	-0.17314		0.413129	46.4921	-0.129683		45.0807	2
CC_OL_025_L14	-0.0402393		-0.0721354		0.192005	33.8404	0.0155599		0.371591	42.1044	0.191531	12.1023	27.6504	2
CC_OL_026_A14	-0.173573	44.9968	0.016905		-0.0220764		0.099417		-0.655758	1.3948	-0.148306		45.0807	2
CC_OL_026_H06	-0.0557048		0.0580462		-0.235079		0.0456247		0.16886		0.27074	37.1539	46.6954	2
CC_OL_026_O14	-0.0306821		-0.027141		0.177254	37.2031	0.251451	46.4198	0.00712852	37.6844	-0.857226	0.541822	27.6504	2
CC_OL_027_B08	0.0949153	29.718	0.0765511		-0.302728		-0.33117	19.9495	0.270378	37.6844	0.269795	15.0033	46.6954	2
CC_OL_027_G20	0.0172256		0.109568		0.424669	14.9963	0.215022		0.257507	37.6844	0.175166	33.2771	38.2545	2
CC_OL_027_M02	0.638092	4.63086	0.189666		-0.0766465		0.00366384		0.456999	31.2984	0.0310249		36.5087	2
CC_OL_027_O05	0.241764	19.0265	0.177228		-0.0344455		0.0622734		-0.104001		-0.518425	0.835227	5.07451	2
CC_OL_027_O18	0.191801	8.31651	0.113429		0.346005	29.8948	0.0304854		-0.0744256		0.33633	25.9325		2
CC_OL_028_C05	0.0745852	48.3647	-0.0110519		0.118819	46.9822	0.270156	34.9677	0.383051	42.1044			32.8143	2
CC_OL_028_F17	-0.481491	12.0207	-0.00603036		0.4116	16.7058	0.18318	31.3506	-0.21748		0.0287959	49.9057	38.2545	2
CC_OL_028_G09	-0.0264093		-0.0438116		0.122308		-0.0732895		-0.0192996		-0.124068			2
CC_OL_028_G18	-0.141699		-0.0709112		0.326421	26.8456	0.122419		-0.485668	24.385	-0.0690851	47.0896	31.0409	2
CC_OL_028_H12	-0.0104824		-0.143803		-0.140478		0.0963699	46.4198	0.00411486		-0.114981	49.9057		2
CC_OL_028_H24	-0.0214679		0.0938299		0.179376		0.0893761		-0.0257791		-0.155326	29.5603	24.012	2
CC_OL_028_K07	0.310234	2.32496	0.212047		0.470862	6.72025	0.203594	31.3506	-0.197193		0.0496886	37.1539	8.87849	2
CC_OL_028_K22	0.144439	29.718	0.135802		0.125515		0.067642		-0.0867956	42.1044	-0.310473	6.39063	5.93671	2
CC_OL_028_P20														2
CC_OL_029_B20	-0.0277117		-0.0237977		0.0281138		0.0743443		0.0260235		0.0748065	40.5623		2
CC_OL_029_I13	0.321892	37.5172	0.126992		0.102373		-0.132707	26.4536			-0.655923	12.1023	8.87849	2
CC_OL_029_K10	0.136292	29.718	-0.0998572		-0.137418		0.0917373		0.035695	42.1044	0.224011	22.3838	46.6954	2
CC_OL_029_L03	-0.086699		-0.117189	49.244	0.122102	42.2193	0.109905		-0.37701	2.73336	-0.821437	1.68706	5.07451	2
CC_OL_029_N22	-0.00413574		0.0626826		0.184759	37.2031	0.0578798	46.4198	-0.0472095		-0.138403		36.5087	2
CC_OL_030_C05	0.488932	7.17452	0.310968		0.0966744		0.117093		0.293121	34.569	0.541791	15.0033		2
CC_OL_030_D23	0.0690946	29.718	0.287122		0.314535	23.4001	0.23294	24.6475	0.0520309		-0.512487	12.1023	10.2741	2
CC_OL_030_K21	0.0323927		-0.132985		0.0888257		0.00717599		0.0467245		0.390826	15.0033	17.0611	2
CC_OL_030_N21	-0.0609812		-0.0916878		-0.334991	20.3752	0.0514017		0.460362	21.4061	0.480088	8.05179	24.012	2
CC_OL_031_J02	0.121678		-0.155022		-0.192858		0.425445	42.6069	0.278836	42.1044	0.049022		31.0409	2
CC_OL_032_J19	-0.0144348	40.8778	0.356207		0.0360932	46.9822	-0.0932672		-0.0821427		0.232933	12.1023		2
CC_OL_032_L01	-0.233751	8.31651	-0.0992586		0.0483006		0.042302		0.138354		0.000572118			2
CC_OL_033_A10	0.0275564		0.256338		0.0223258		-0.105843		-0.245527	19.8042	-0.0706884		12.5609	2
CC_OL_033_G04	0.0604084		0.000227096		0.00584844		0.111959		-0.312715	16.4559	-0.420477	2.6814	4.35452	2
CC_OL_033_G13	-0.0783895		0.108396		0.143771	46.9822	0.183217	26.4536	0.191244	46.4921	0.137679	37.1539		2
CC_OL_033_G16	0.281121	5.5422	0.0054524		0.11201		0.128831		-0.188434	37.6844	0.230655	15.0033		2
CC_OL_033_I02	0.700808	3.31382	-0.11103		-0.253369	14.9963	0.0552389		-0.417209	9.79633	0.0387162		24.012	2
CC_OL_033_J02														2
CC_OL_034_B20	0.0229598		0.112026		0.0199352		0.0273708		0.123226		0.101725	44.0973		2
CC_OL_034_E24	-0.169228	48.3647	-0.195272		-0.123166		-0.0565793		-0.0921521		-0.265447	18.8282	31.0409	2
CC_OL_034_L01	-0.304723	19.0265	-0.175799		0.0936294		-0.00331509		-0.0111157		0.10532	49.9057	24.012	2
CC_OL_035_B19	-0.0460383		0.0871592		0.232507	23.4001	0.133507		0.0814877	46.4921	0.178248	47.0896		2
CC_OL_035_F09	-0.0507241		0.179985		0.0642191		0.138582		-0.107939		0.200797	18.8282		2
CC_OL_001_B04	0.00302256		-0.126592	49.244	0.252273	42.2193	0.0138904		0.16665		-0.494993	18.8282	40.0133	3
CC_OL_001_B07	0.202944	33.7527	0.120247		0.0112583		-0.100524		-0.0613039		0.0509499	33.2771		3
CC_OL_001_B16	0.170032	22.2561	0.107608		-0.0590922		-0.0732078		-0.209655		-0.690801	2.33695	0.782135	3
CC_OL_001_C02	-0.124839	40.8778	-0.271135	21.9863	0.0801084		-0.0784651		-0.142322	46.4921	0.196895	33.2771	31.0409	3
CC_OL_001_C22	-0.0137584		-0.468768	15.8136	0.251886		0.0727628		0.0158212		-0.119315	40.5623		3
CC_OL_001_E05	0.171583	13.6381	0.210398		-0.0949043		-0.104594		0.134647	46.4921	-0.0630835	49.9057	31.0409	3
CC_OL_001_F05	1.11608	2.10777	0.542649	40.2379	-0.202364	33.8404	-0.224957	10.4046	-0.115742	42.1044	0.353547	12.1023	18.3434	3
CC_OL_001_F10	-0.0717951		0.193949		0.146965		-0.225791	17.4104	-0.0410731		-0.056374			3
CC_OL_001_F20	-0.377048	19.0265	0.0535842		0.181646		-0.005092		-0.370781	16.4559	-0.503413	2.33695	17.0611	3
CC_OL_001_G05	0.166599	33.7527	0.231713		0.230412	42.2193	0.0085519		0.183631	37.6844	-0.108293			3
CC_OL_001_G19	-0.00154658		0.0815223		0.0750406		0.0543694		0.0423397		0.416355	9.83445	31.0409	3
CC_OL_001_H09	0.0462799		0.0634861		0.35556	14.9963	0.222447	31.3506	-0.0231015		-0.181938	25.9325	22.1877	3
CC_OL_001_H10	0.748727	2.2718	0.488031		0.165487		-0.0444135		-0.156827		0.086932	25.9325	27.6504	3
CC_OL_001_I08	-0.206986		-0.0622927		0.131266	46.9822	0.0544378		0.0272611		0.123907	29.5603	36.5087	3
CC_OL_001_I24	0.186867	12.0207	0.113076		-0.337329	2.98492	-0.215957	49.7484	0.134222	42.1044	0.328191	40.5623		3
CC_OL_001_L21	0.137418	37.5172	0.129624		0.100144		0.0299935		-0.105218		-0.177988		27.6504	3
CC_OL_001_N17	0.140093	19.0265	0.0971665		0.163462	29.8948	0.122835		0.0323464		0.00912099		29.2653	3
CC_OL_001_O03	-0.015294		-0.481341	31.8463	-0.154347		-0.192216		-0.530638	1.56915	-0.902129	1.68706	3.97255	3
CC_OL_001_O09	0.283041	12.0207	0.0292297		-0.0843199		-0.0576601		-0.0243549		0.385308	15.0033		3
CC_OL_001_O11	-0.0924774		0.0804808		-0.0318645		-0.0848992	46.4198	0.089348		0.0927709	44.0973	46.6954	3
CC_OL_001_O13	-0.215299	19.0265	0.0315353		0.149035	37.2031	0.043268		-0.226298	34.569	-0.137024	47.0896	46.6954	3
CC_OL_001_O19	0.188383	25.8116	0.0236309		0.230058	37.2031	0.0754378		0.255598		-0.112725	37.1539	29.2653	3
CC_OL_001_O24	0.121915	25.8116	-0.0690372		0.215508		0.0276391		-0.196537		0.104486		48.4602	3
CC_OL_001_P21	-0.031084		0.0403055		0.167692	46.9822	0.0777246	46.4198	-0.098041		0.226121	47.0896		3
CC_OL_001_P23	0.0268867		0.202519		-0.0453201		-0.0940162	49.7484	-0.21947	42.1044	0.192889	25.9325		3
CC_OL_002_A04	0.116957	25.8116	0.0722854		0.0210993		-0.0243339		-0.149098		0.355301	25.9325		3
CC_OL_002_A12	0.509544	1.68564	-0.111671		-0.00159113		0.101439	46.4198	0.0923866		-0.111622		29.2653	3
CC_OL_002_B02	0.551366	3.78856			-0.160701	26.8456	-0.299408	6.78638					15.7073	3
CC_OL_002_B06	0.143085	15.9625			0.210279		-0.125608	26.4536	0.386485	31.2984	-0.156234	49.9057		3
CC_OL_002_B21	-0.0725829	44.9968	-0.0750722		0.065543		-0.0595731		-0.0266365		0.0352742	49.9057	49.9559	3
CC_OL_002_C06	0.175223	37.5172	0.187776		0.33591	20.3752	0.0830186		-0.13236		0.234641		25.8284	3
CC_OL_002_D10	-0.1089		0.245564		-0.536218	5.93425	-0.0811401		0.17031		0.273824	18.8282	46.6954	3
CC_OL_002_E19	0.178676	37.5172	-0.129132		0.044415		-0.25058	17.4104	0.0416095		0.272929	9.83445		3
CC_OL_002_E21	0.12796	15.9625	0.209786		0.135029	46.9822	0.157753	38.5493	-0.201633	28.6663	-0.1645	44.0973	5.93671	3
CC_OL_002_E23	0.0766768		-0.118215	49.244	0.0780539		-0.0295363		0.250103	34.569	0.15447	22.3838	24.012	3
CC_OL_002_F07	-0.0960472		0.288159		0.0573086		-0.098562		0.0572867		0.154042	33.2771		3
CC_OL_002_G01	0.364079	1.68564	0.00340015		0.247133	26.8456	0.0556728		-0.088349				0.782135	3
CC_OL_002_G21	0.147065	15.9625	0.0503791		0.00535701		0.105629	49.7484	0.00843798		-0.148851	37.1539	11.557	3
CC_OL_002_H24	0.0208404		0.131222		0.0592068		0.229109	34.9677	-0.565527	1.56915	-0.375093	12.1023	3.97255	3
CC_OL_002_K11	0.260548	12.0207	0.0184728		0.00764036		-0.0112596		0.164902	42.1044	0.325171	18.8282		3
CC_OL_002_K14	0.158153	19.0265	0.0620953		0.164657	26.8456	0.12687	49.7484	-0.0201152		0.119932	40.5623	38.2545	3
CC_OL_002_K19	0.0686038	40.8778	0.373737		0.0415511		0.0338338		-0.0214163		-0.0412413		31.0409	3
CC_OL_002_L02	-0.272121	8.31651	-0.0472756		0.0200091		0.0405758		0.254465	46.4921	0.180577		34.526	3
CC_OL_002_M08	-0.309629	40.8778	-0.115275		-0.0435725		0.0171764		0.0422592		-0.0792503		38.2545	3
CC_OL_002_O08	0.321655	19.0265	0.387042		0.326432	20.3752	0.00374438		0.0938413		0.210584	33.2771	40.0133	3
CC_OL_003_F15	0.195018	10.3357	0.181002		-0.00837686		-0.396905	24.6475	-0.476235	24.385	-0.108502		24.012	3
CC_OL_003_F16	0.134286	19.0265	0.0717812		-0.179029		-0.0105238		0.0977106		-0.0022002	47.0896		3
CC_OL_003_G18	0.323802	12.0207	0.0730986		0.0529952		0.0416883		0.0858496		-0.43571	18.8282	7.26894	3
CC_OL_003_I04	0.279249	12.0207	0.378755		0.22926	37.2031	0.129006	42.6069	-0.116012		-0.076169	47.0896	1.65311	3
CC_OL_003_J04	0.657525	1.68564	0.579705		0.270825	37.2031	-0.00284636		0.137125		0.134199	47.0896	5.07451	3
CC_OL_003_J06	-0.243945	44.9968	-0.120695		0.0699854		-0.0106132		-0.00237549		0.0501534		43.4785	3
CC_OL_003_K14	0.210314	6.38553	-0.203926		-0.0607005		-0.00913077		-0.128702		0.0260484		43.4785	3
CC_OL_003_K19	0.342915	7.17452	0.0631721		0.0582324		0.0364141		0.132841		0.503517	6.39063		3
CC_OL_003_O17	-0.0143334		0.0185323		0.269476	16.7058	0.342452	17.4104	0.190047	37.6844	-0.358132	9.83445	41.6943	3
CC_OL_003_P08	-0.180154	19.0265	0.0633082		0.0532681		0.0392467		-0.0971268		-0.0993472			3
CC_OL_004_A05	-0.0550112		-0.321056		-0.455763	2.38721	-0.414738	5.01725	-0.143204		-0.693103	0.835227	27.6504	3
CC_OL_004_A13	-0.0652349		-0.0829258		0.0837676		0.0479848		-0.134725		1.09897	4.14154	17.0611	3
CC_OL_004_B01	0.0126507		-0.0303892		0.100373		0.226033	24.6475	-0.101737		-0.143542	47.0896		3
CC_OL_004_C05	0.229778	8.31651	0.186174		0.0925069	46.9822	0.0946219	46.4198	0.171537		0.00930603		25.8284	3
CC_OL_004_C08	0.199613	22.2561	0.38764		0.139493	46.9822	0.198026	34.9677	0.157466	42.1044	0.553816	9.83445	34.526	3
CC_OL_004_C14	0.266876	3.78856	-0.09871		-0.0857763		0.0360364		0.146826		0.910192	6.39063	15.7073	3
CC_OL_004_C20	0.509725	5.5422	0.14259		0.158447	37.2031	0.163282	49.7484	0.130502		0.225607	40.5623	11.557	3
CC_OL_004_D05	0.226109	13.6381	-0.141373		-0.0541505		-0.00331363		-0.421619	34.569	0.106863	44.0973		3
CC_OL_004_D06	0.395867	5.5422	0.237506		-0.0938872		-0.19617	49.7484	-0.132711		0.0574527		15.7073	3
CC_OL_004_D07	0.190306	19.0265	0.0540008		0.185537	42.2193	0.0326015		-0.0865255		0.0550007		31.0409	3
CC_OL_004_D18	0.136899	40.8778	0.195802		0.0364754		-0.157004	31.3506	0.138127		0.232162	18.8282		3
CC_OL_004_E14	0.158636		0.531224	15.8136	0.239631	18.2822	0.124871		-0.0592936		-0.25183	33.2771	24.012	3
CC_OL_004_E17	0.255246	22.2561	0.044276		-0.225506		-0.00240024		0.246454		-0.0293151			3
CC_OL_004_E18	-0.0560031		-0.0465916		0.0598717		-0.162355		-0.07731		-0.320701	25.9325	25.8284	3
CC_OL_004_F05	-0.750751	13.6381	-0.587096	21.9863	0.210702	29.8948	0.25661		0.0124109		0.154162	18.8282	29.2653	3
CC_OL_004_F09	0.425687	8.31651	0.173975		0.243549	29.8948	0.0989597	49.7484	-0.159926		0.043257		10.2741	3
CC_OL_004_F14	0.182333	29.718	-0.000910164		-0.0928271		-0.0150473		-0.133518		0.0929158		36.5087	3
CC_OL_004_G14	0.378327	1.81504	0.354101		-0.0940373		0.103946		-0.0686763		-0.725219	37.1539	3.97255	3
CC_OL_004_H03	0.202464	10.3357	0.0982226		-0.0469825		0.154158		0.194423	37.6844	-0.150755		32.8143	3
CC_OL_004_H04	0.492487	3.31382	-0.0121612		-0.0134228		-0.00949399		-0.255624	26.3119	-0.00577412		5.93671	3
CC_OL_004_H07	-0.0835029		0.00424786		0.190714	37.2031	-0.0817226		-0.168845		-0.271378	29.5603	36.5087	3
CC_OL_004_H21	0.178729	33.7527	-0.110424		-0.247284		0.0842742		0.172639		0.253173			3
CC_OL_004_I03	0.05985	40.8778	0.214718		-0.0192801		0.00474452		-0.0192745		0.206798	49.9057		3
CC_OL_004_K03	0.440297	6.38553	0.43879	45.1357	0.608257	4.42277	0.698255	24.6475	0.755579	5.74956	0.51957	12.1023	45.0807	3
CC_OL_004_K10	0.397693	1.68564	0.272667		0.0761379		0.0702215		0.13288		-0.222539	8.05179	1.62381	3
CC_OL_004_K19	0.256863	13.6381	0.358464	37.0587	-0.0100518		-0.00687643		-0.238177	34.569	0.0107032	47.0896	12.5609	3
CC_OL_004_N02	0.0588334	37.5172	-0.148162		-0.00315821		0.0765216		-0.0974892		0.095463	25.9325	49.9559	3
CC_OL_004_N08	0.238734	13.6381	0.33921	40.2379			0.0877052	38.5493	0.421615	34.569	0.753146	2.33695	24.012	3
CC_OL_004_P05	0.294183	7.17452	0.0239286		-0.165682	33.8404	-0.0645475		0.203797		0.335445		31.0409	3
CC_OL_005_A14	-0.104406		-0.275674	40.2379	-0.496825	6.72025	-0.391048	3.62885	-0.435019	1.56915	0.289445	44.0973		3
CC_OL_005_B06	0.23465	12.0207	0.103535		0.140979		-0.0293238		-0.0780756		0.221971	40.5623	31.0409	3
CC_OL_005_B23	0.324278	22.2561	0.128752		0.125104	37.2031	0.119137	49.7484	0.246034		-0.0400354		15.7073	3
CC_OL_005_C18	0.402652	3.31382			0.147846	46.9822	0.131956	42.6069	0.150276	42.1044	0.292154	6.39063		3
CC_OL_005_C22	0.205983	13.6381	0.125339		-0.0101943		0.0524612		0.164806	46.4921	0.366945	9.83445	41.6943	3
CC_OL_005_F04	0.489797	4.63086	0.115615		0.0843022		0.0855556		0.0198805		0.0446275	49.9057	17.0611	3
CC_OL_005_K04	0.0329215	48.3647	-0.169182		0.272907	42.2193	-0.0879598		0.238664	37.6844	0.0636775	29.5603	38.2545	3
CC_OL_005_K08	0.123075	40.8778	-0.247878		-0.0877427		0.0647213		-0.0886368		-0.0541572			3
CC_OL_005_M09	1.68642	2.32496	0.497861		0.153226		-0.202283	22.1072			0.197474	44.0973	14.3906	3
CC_OL_005_N07	0.151941	37.5172					0.448976	38.5493						3
CC_OL_005_O22	-0.122637	40.8778	-0.100774		-0.0425153		0.0631717		-0.147142		-0.263687	18.8282		3
CC_OL_005_O24	-0.143598		-0.09285		0.0500611		0.0243909		-0.0135022		-0.119778			3
CC_OL_006_B03	0.103668	25.8116	0.00934019		0.0520621		-0.0160381		0.00736042		0.159604	22.3838		3
CC_OL_006_B06	0.053192		-0.0575472		-0.0756364		-0.0321264		0.0332257		0.00828176	49.9057		3
CC_OL_006_B17	0.973717	1.81354	0.28955		0.106128		0.184591		0.167912	42.1044	0.144206	37.1539	18.3434	3
CC_OL_006_D06	-0.146332		0.0894008		0.00497866		-0.156649		0.278778	42.1044	0.329474	9.83445	31.0409	3
CC_OL_006_D22	-0.111681		0.0863618		-0.0241094		-0.0171054		0.0733676		0.0609049	40.5623		3
CC_OL_006_D23	0.0989289	29.718	-0.030861		0.171382		-0.0716604		-0.117786		-0.0338132		34.526	3
CC_OL_006_F11	0.0940622		-0.0724451		-0.0406347		-0.0562477		0.336094	37.6844	0.0716314	40.5623	45.0807	3
CC_OL_006_I23	0.136709	19.0265	-0.0143942		0.110681		-0.0562108		-0.0104603		-0.121488	44.0973	14.3906	3
CC_OL_006_J06	0.896108	0.959265	0.663619	45.1357	0.0579855		-0.129154		0.159765		-0.142991	47.0896	1.62381	3
CC_OL_006_L04	0.353386	8.31651	0.053015		0.158255	46.9822	0.0195865		0.117895		0.305698	29.5603		3
CC_OL_006_L18	0.156326	7.17452	0.151826		-0.0224832		-0.0827212		0.124501		0.410211	9.83445		3
CC_OL_006_L22	-0.108058		-0.130966		0.410724	23.4001	0.0465521		-0.354896	28.6663	0.145006	47.0896		3
CC_OL_006_N03	0.0582062	40.8778	0.406688		-0.23292		0.419577	15.5702	-0.285007	26.3119	-0.780419	4.14154	7.26894	3
CC_OL_007_A04	0.275298	4.63086	0.262109		0.163841	46.9822	0.0244173		-0.183443	46.4921	-0.0665151		3.97255	3
CC_OL_007_A15	-0.23121	4.63086	-0.104319		-0.0861435		-0.1949	10.4046	0.00673815		-0.0482517		48.4602	3
CC_OL_007_B03	0.156813	22.2561			-0.138086	42.2193	0.55667	49.7484			0.389643	25.9325		3
CC_OL_007_F09	0.0736607		-0.0409954		0.0619409		-0.0204529		-0.113097		-0.00467034		24.012	3
CC_OL_007_F23	0.0618851	37.5172	0.284799		0.0849243	42.2193	0.0463622		-0.135181		-0.206346	22.3838	10.2741	3
CC_OL_007_H06	0.111069	33.7527	0.075406		0.113668	42.2193	0.0909641		-0.0141905		-0.224308	47.0896	24.012	3
CC_OL_007_H24	0.222668	29.718	0.198768		0.156971	37.2031	0.223062	22.1072	0.059662		0.10551		31.0409	3
CC_OL_007_I07	-0.0625607		0.0111122		0.239676		0.0596912		-0.037156		-0.157218		41.6943	3
CC_OL_007_L10	0.139425	19.0265	0.21652		0.149158	42.2193	-0.000828382		-0.0469964		-0.0708634		15.7073	3
CC_OL_007_L23	-0.154622		-0.224947		-0.0206783		0.00515517		0.0721691		0.0864488	44.0973	25.8284	3
CC_OL_007_M04	0.263617	19.0265	0.21885		-0.0778388		0.042324		0.0293334		0.169044	15.0033		3
CC_OL_007_N07	0.381105	8.31651	0.118747		-0.219855		-0.31147	26.4536	-0.413624	6.33755	0.0170755		10.2741	3
CC_OL_007_P04	0.031423		-0.0260289		-0.0740203		-0.212968	38.5493	-0.0413244		-0.193112	25.9325	24.012	3
CC_OL_008_D08	0.191197	25.8116	-0.049653		-0.000834188		-0.00558095		-0.0855151		-0.139384	47.0896	45.0807	3
CC_OL_008_D18	-0.0330257		0.108387		-0.0487749		-0.0978411		0.0747061		-0.216551	49.9057	32.8143	3
CC_OL_008_G01	0.399171	6.38553	0.0612053		0.136899		0.148243	49.7484			0.0816628	29.5603	34.526	3
CC_OL_008_I19	0.0775501	37.5172	0.0145531		0.0387191		0.0801396		-0.111467		-0.0419412	40.5623		3
CC_OL_008_K05	-0.217782		0.0434644		0.119262	46.9822	0.135991	38.5493	-0.024188		-0.182231	40.5623		3
CC_OL_008_M24														3
CC_OL_008_P05	0.0687711		0.102009		-0.136977		-0.0990723		-0.308074	11.3424	-0.256917		27.6504	3
CC_OL_009_B21	-0.0735941		-0.0621421		0.197131	20.3752	-0.107285		0.146299		0.58135	29.5603	11.557	3
CC_OL_009_C18	0.0817339	22.2561	0.266591		-0.0860311		0.0607972		-0.105709		-0.230777	49.9057	20.8934	3
CC_OL_009_D16	0.360757	3.78856	0.0715053		0.30895	11.0134	0.30941	15.5702	-0.20087	42.1044	-0.143425	44.0973	2.09221	3
CC_OL_009_E18	-0.0485806		-0.00646305		0.162069		-0.0324569		0.335894	42.1044	0.340152	9.83445	27.6504	3
CC_OL_009_F15	0.422104	3.31382	0.447689		0.350216	13.5015	0.313131	15.5702	0.0917926	46.4921	-0.00232604		7.26894	3
CC_OL_009_F17	1.12194	0.714747	0.560945		-0.0341181		-0.0192552		0.390785	37.6844	-0.404729	44.0973	1.65311	3
CC_OL_009_F20	0.862897	4.63086	0.372529		-0.0836443		-0.215679	49.7484	0.00753274		0.115072		3.97255	3
CC_OL_009_G10	0.259825	7.17452	0.188169		0.224221	33.8404	0.0835366		0.113239		0.270363	9.83445	29.2653	3
CC_OL_009_J19	0.148374	19.0265	-0.0481952		-0.0103412		-0.154014		0.231874	37.6844	-0.0525986	49.9057		3
CC_OL_009_K21	0.166533	10.3357	0.0336996		0.0700792		0.0146182		-0.0605941	37.6844	0.318825	12.1023		3
CC_OL_009_N02														3
CC_OL_009_N24	0.243649	8.31651	-0.0434279		0.203863	37.2031	0.014589		-0.00291744		0.248341	22.3838		3
CC_OL_009_P18	-0.881609	1.402	-0.39508	12.0608	-0.326765	14.9963	-0.261755	15.5702	-0.125309		-0.0394961		3.97255	3
CC_OL_010_E10	0.0677594	25.8116	0.0605799		0.267011	20.3752	0.153058	38.5493	-0.131178	42.1044	-0.0207845		24.012	3
CC_OL_010_G13	0.203481	19.0265	0.0256959		0.0389176		-0.0956675		-0.0695284		0.148307		41.6943	3
CC_OL_010_H03	-0.0873055		0.106492		-0.0429419		-0.0494781		-0.257364	19.8042	-0.258492	18.8282	18.3434	3
CC_OL_010_H13	0.87692	19.0265			-0.1591	26.8456	-0.158716		-0.434467	14.9433				3
CC_OL_010_I08	0.10884	29.718	0.0264498		0.278309	16.7058	0.144726	31.3506	-0.160439	28.6663	-0.124992		18.3434	3
CC_OL_010_I09	0.366138	6.38553	0.0829946		-0.127446		0.0396948		0.0141446		0.0961745	49.9057	32.8143	3
CC_OL_010_I20	-0.224162	29.718	0.0735471		-0.0546727		0.0553191		0.200322		-0.835043	2.33695	22.1877	3
CC_OL_010_I22	0.307857	2.91035	0.183515		-0.275047	26.8456	-0.189291	31.3506	-0.0103925		0.0968779		27.6504	3
CC_OL_010_J06	0.0118196	29.718	0.0112305		0.156142		0.110147		0.478917	37.6844	0.733455	15.0033	24.012	3
CC_OL_010_O06	0.143443	22.2561	0.346959		0.108248		-0.0845576		-0.442903	6.05829	0.189991		12.5609	3
CC_OL_010_O15	0.140656	22.2561	0.200703		0.250494	23.4001	0.158918	38.5493	0.116582		0.280271	9.83445		3
CC_OL_010_P05	-0.109191		0.132959		0.05058		-0.0602898		0.0869323		0.129089	47.0896		3
CC_OL_011_D01	0.535074	1.68564	0.39903		-0.0283376		-0.10543		-0.0527542		-0.155016		11.557	3
CC_OL_011_D10	0.229758	4.63086	0.0829606		0.044637		-0.00400736		0.098955		0.288133	9.83445		3
CC_OL_011_E24	0.112683	37.5172	-0.0764744		-0.0064829		-0.0334619		0.187232		0.461191	6.39063	38.2545	3
CC_OL_011_F19	0.0150612	29.718	-0.438558	26.5964	0.0827375	46.9822	-0.0742982		0.267085	31.2984	0.143031	49.9057		3
CC_OL_011_G08	0.00599981		0.232497		0.0999481	46.9822	-0.119207		-0.0835319		-0.0570749		34.526	3
CC_OL_011_H08	0.149785	19.0265	0.215622		0.114968		0.170774	38.5493	0.332481	28.6663	0.75464	0.20657	22.1877	3
CC_OL_011_H18	0.151263	19.0265	-0.389838		-0.272804	26.8456					0.489128	15.0033		3
CC_OL_011_I24	0.247421	22.2561	0.289269		0.0587729		-0.033243		-0.0331639		-0.114868	47.0896	10.2741	3
CC_OL_011_J10	0.219415	19.0265	0.0754451		-0.103526		-0.0281398		-0.0316135		-0.0350467		31.0409	3
CC_OL_011_N05	0.324351	3.31382	0.294723		0.182369	26.8456	0.0223977		0.362752	37.6844	0.030706		14.3906	3
CC_OL_011_N13	-0.78361	25.8116	0.19496		0.240069	23.4001	-0.196212	19.9495	0.0549938	42.1044				3
CC_OL_012_E19	0.100256	37.5172	0.0791157		0.0560892		0.0291995		0.0507948		-0.37275	9.83445	11.557	3
CC_OL_012_F06	0.00497655		-0.00469049		-0.193205		-0.184201	34.9677	0.483724	34.569	0.119513	37.1539	32.8143	3
CC_OL_012_G12	0.0147408		-0.216869	45.1357	0.0241343		-0.0589224		-0.136494		0.107361		45.0807	3
CC_OL_012_I02	0.183868	29.718	0.271891		0.0685774		-0.0983841		0.00278895		0.15288	44.0973	40.0133	3
CC_OL_012_J11	0.265503	13.6381	0.0388558		-0.242711		0.0306565		-0.105078		-0.416059	18.8282	17.0611	3
CC_OL_012_O09	0.0677757	29.718	-0.0432754		0.0528061		0.046083		-0.169354	31.2984	0.00710915		27.6504	3
CC_OL_012_O16	0.514636	3.78856	0.321114	34.5567	-0.0423852		0.0205477		-0.366692	8.3482	-1.14195	0.363199	0	3
CC_OL_012_P06	-0.0225397		-0.100974	49.244	0.0424497		0.0578751		-0.0942289	34.569	0.0317321			3
CC_OL_013_C08	0.198542	19.0265	0.161746		-0.105637		0.0176449		-0.291988	24.385	-0.410027	25.9325	4.35452	3
CC_OL_013_D08	0.443425	4.63086	0.255021		0.0584851		0.0610349		-0.270964	34.569	0.146419	22.3838	17.0611	3
CC_OL_013_D19	0.197652	12.0207	0.0657687		0.223929	33.8404	-0.0508087		0.25037		-0.19003		11.557	3
CC_OL_013_F13	0.0988736	22.2561	-0.0864519		-0.103303		-0.162078		-0.19723		0.136559	49.9057		3
CC_OL_013_G01	0.0830452	29.718	-0.0523772		0.140362	42.2193	-0.154867	26.4536			-0.787764	18.8282	4.35452	3
CC_OL_013_G20	0.0813562	25.8116	-0.283988	34.5567	-0.0537958		0.000645223		0.102496		0.0933097	33.2771	48.4602	3
CC_OL_013_H07	0.168537	19.0265	0.132526		0.271466	26.8456	0.047277		0.151787	37.6844	-0.0390159	47.0896		3
CC_OL_013_H20	0.496215	2.32496	0.19205		-0.510223	4.42277	-0.0794575		-0.176865	42.1044	0.438713	8.05179	49.9559	3
CC_OL_013_H24	0.0154256		-0.0286652		-0.612126	37.2031	-0.011871		0.167928		0.196013	49.9057		3
CC_OL_013_N18	0.302247	22.2561	0.143637		0.0206703		0.0691535		0.493782	42.1044	0.193204	47.0896		3
CC_OL_013_O11	0.238668	8.31651	0.0542884		0.105825		0.148933		0.0632559		0.0884071	33.2771		3
CC_OL_013_P15	0.34305	2.91035	0.26849		0.218603	20.3752	0.00355572		-0.390238	7.15844	-0.57201	3.22942	0	3
CC_OL_013_P22	0.124829	22.2561	0.0508127		0.168266	46.9822	-0.0685567		-0.380611	8.3482	-0.562343	4.14154	0.782135	3
CC_OL_014_B04	0.0727101	29.718	-0.250022	45.1357	0.000551566		-0.0442158		0.0500964		0.024784			3
CC_OL_014_B21	-0.333988	29.718	-0.286377	21.9863	-0.273623	14.9963	-0.236981	42.6069	0.353298	37.6844			12.5609	3
CC_OL_014_C11	0.220244	15.9625	-0.272359	37.0587	-0.120701		-0.111261		0.0281829		-0.0740929			3
CC_OL_014_E15	0.229626	7.17452	-0.0259558		0.197105	20.3752	0.166711	42.6069	0.0531403		-0.416503	1.19021	4.35452	3
CC_OL_014_G20	0.059752	37.5172	0.0256701		0.114741		0.0175004		0.179575	37.6844	0.16797	18.8282	31.0409	3
CC_OL_014_H14	0.302682	6.38553	0.114634		-0.00360503		0.00322275		-0.263464		0.00195273		12.5609	3
CC_OL_014_K23	-0.0942401		0.0323808		-0.373195	6.03974	-0.195851	22.1072	-0.34011	9.79633	0.502062	12.1023	48.4602	3
CC_OL_014_P04	0.339396	3.31382	0.449362		0.215685	37.2031	0.315682	28.1875	0.363589	37.6844	-0.282644	37.1539	6.34878	3
CC_OL_015_B08	-0.0697658		0.0178997		-0.0175856		-0.0880224		-0.0993488	42.1044	-0.0872709	49.9057	38.2545	3
CC_OL_015_B17	-0.0732849		0.357293		0.141128		-0.061046		0.064325					3
CC_OL_015_F19	0.00828375		-0.0190132		0.0706329		-0.0187598		0.128218	42.1044	0.27198	29.5603	27.6504	3
CC_OL_015_G17	-0.123638		-0.082287		-0.0586595		-0.11538		-0.264212	24.385	-0.561501	0.835227	14.3906	3
CC_OL_015_H13											0.0948718			3
CC_OL_015_I09	-0.211339	33.7527	0.459807	40.2379	0.0998443		0.159868		-0.097813		0.207502	37.1539		3
CC_OL_015_I14	0.133595	22.2561	0.175875		0.0892472		-0.019975		-0.00729627		-0.389777	9.83445	4.35452	3
CC_OL_015_I21	0.0947021		0.151749		0.145421	46.9822	0.0412366		0.255762	42.1044	0.0438623			3
CC_OL_015_M08	-0.0315375		0.146146		0.202395	37.2031	0.275375	15.5702	-0.158101	46.4921	-0.0472529		45.0807	3
CC_OL_015_N18	0.167074		0.158479		0.199926		0.0265446		-0.192133	28.6663	0.0484043		27.6504	3
CC_OL_015_P13			0.115966		0.221539	42.2193	-0.166544	38.5493	0.155552					3
CC_OL_016_A11	-0.0153656		0.143571		-0.242428		-0.25587	38.5493	-0.0248929		0.40295	29.5603		3
CC_OL_016_D20	0.240534	5.5422	-0.0824667		-0.0156795		-0.0666739		0.0495198		-0.164815	40.5623	19.7483	3
CC_OL_016_G06	0.0124489		-0.189263	49.244	-0.183348		-0.0698111		0.0251615		0.162555		49.9559	3
CC_OL_016_H03	0.480605	2.10777	0.384144	37.0587	0.0269778		0.0545848		-0.14516		0.667697	6.39063		3
CC_OL_016_J06	-0.0192292		-0.0654359		-0.119475		-0.0900763		0.106013		0.0408112	40.5623		3
CC_OL_016_M08	0.243753	7.17452	0.0999801		0.281983	23.4001	0.0468041		-0.16393		0.0144285	49.9057	27.6504	3
CC_OL_016_N19	-0.381142	29.718	-0.188532	45.1357	0.13159	37.2031	0.173708	46.4198	0.194691		0.142587	40.5623	19.7483	3
CC_OL_016_P19	0.0677378	29.718	0.115033		-0.0688971		-0.123755		-0.299968		0.209371	40.5623		3
CC_OL_017_D18	-0.241794	29.718	-0.213818	49.244	-0.10721		-0.00187891		0.121561	46.4921	0.149834	29.5603	14.3906	3
CC_OL_017_E12	0.159577	19.0265	0.207104		0.0632714	37.2031	-0.145136	49.7484	0.00904386		0.0314934	49.9057		3
CC_OL_017_G12	-0.0914147		-0.039167		0.0808388		0.0516413		-0.0209913		-0.164			3
CC_OL_017_G18	0.030966	40.8778	-0.00111044		0.237041	26.8456	0.257782	19.9495	-0.433891	6.05829	-0.160716	49.9057	17.0611	3
CC_OL_017_G20	0.147944	33.7527	0.106426		0.132858		-0.0175348		-0.189619		0.123626	37.1539		3
CC_OL_017_G21	-0.170667	33.7527	0.0466325		0.115523		0.00018551		0.0952765		0.146532	25.9325	31.0409	3
CC_OL_017_J04	-0.065529		-0.407177	45.1357	0.15746	33.8404	0.248698	22.1072	0.252991	37.6844	0.0480399	49.9057	32.8143	3
CC_OL_017_K03	-0.280126	19.0265	-0.26784	21.9863	-0.110475		-0.125418		-0.262917	37.6844	0.104962		36.5087	3
CC_OL_017_K24	-0.259595		0.0210586		0.05192		-0.0177033		-0.11283		0.123839	29.5603		3
CC_OL_017_L02	0.327496	10.3357	0.225041		0.161891	46.9822	0.145351	42.6069	0.272647		0.426854	15.0033		3
CC_OL_017_L16	0.172107	25.8116	0.481125		0.16931		0.146088		0.096725		-0.291959	44.0973	15.7073	3
CC_OL_017_N09	-0.0293307		0.110689		0.17637		0.0929947		0.203866	37.6844	0.220354	9.83445	27.6504	3
CC_OL_017_P04	0.441306	6.38553	0.28014		0.107191		0.18597	42.6069	-0.222065		-0.225833		8.07623	3
CC_OL_017_P07	0.163903	19.0265	-0.0347938		0.164303	29.8948	0.136605	46.4198	0.0239954		0.182583	22.3838		3
CC_OL_018_A09	-0.0387713		-0.0140846		0.0856332		0.0683315		0.0423558		-0.200099		46.6954	3
CC_OL_018_F08	0.091456	48.3647	-0.0334874		0.0856198		-0.0528348		0.116457		-0.0551935			3
CC_OL_018_F19	-0.0735549	48.3647	0.0392178		0.062492	46.9822	0.142649	46.4198	0.0851893		0.113659			3
CC_OL_018_I09	0.422576	10.3357	-0.249669		0.130219	46.9822	0.206447		0.0519275		0.662572	12.1023		3
CC_OL_018_J12	0.218913	3.31382	-0.0520123		-0.00596247		-0.136028	31.3506	0.00785278	42.1044	0.388062	12.1023	46.6954	3
CC_OL_018_J22	0.358048	3.78856	0.10544		0.00119886		-0.0160751		-0.176138		0.0107447		14.3906	3
CC_OL_018_M09	0.101531	22.2561	0.120565		0.11316		0.109577	42.6069	0.242563	37.6844	-0.673129	12.1023	12.5609	3
CC_OL_018_N08	0.0269564		0.204804		0.227955	18.2822	0.0994865		-0.0623032		0.0216711		46.6954	3
CC_OL_018_N23	0.112202	33.7527	0.130019		0.242882	42.2193	0.141578	28.1875	-0.0882416		-0.742438	22.3838	4.35452	3
CC_OL_018_O12	0.379657	1.81354	-0.0596427		-0.167319		-0.142058	38.5493	0.242071		0.324716	12.1023		3
CC_OL_019_A05	0.373583	22.2561	0.179495		0.130518	46.9822	0.0340233		-0.0243418		-0.115319		4.35452	3
CC_OL_019_A14	0.191846	25.8116	-0.266888	37.0587	-0.21631	14.9963	-0.11335		-0.158351	46.4921	-0.604068	15.0033	11.557	3
CC_OL_019_B01	0.972676	1.81354	-0.103177		-0.297655	13.5015	-0.118989		-0.299738	31.2984	0.741189	4.14154		3
CC_OL_019_B17	-0.744449	2.2718	-0.481934	2.29555	-0.112885		-0.160066	31.3506	-0.166808	31.2984	0.340374	15.0033	2.01659	3
CC_OL_019_B18	0.193519	19.0265	0.0157331		0.113516	46.9822	0.116417	49.7484	0.0452979		-0.121327			3
CC_OL_019_B20	-0.158169		0.101827		0.152465		-0.0909845		-0.0787668		0.0155073	47.0896		3
CC_OL_019_F12	0.135813	22.2561	0.062087		0.0321828		-0.0897547		-0.142237	37.6844	0.421036	6.39063		3
CC_OL_019_G07	0.0472483	48.3647	-0.0312277		0.033532		0.0625903		0.15833	46.4921	0.767581	6.39063	25.8284	3
CC_OL_019_I04	0.302272	7.17452	0.131082		0.00420631		-0.0272357		0.120173		-0.0356369	47.0896	4.35452	3
CC_OL_019_K24	-0.00647887		-0.0218553		-0.0563008		0.130944	42.6069	-0.140728		0.23224	12.1023	43.4785	3
CC_OL_019_L01	-0.283931	19.0265	-0.303784	21.9863	0.000115287		1.26938	10.4046	1.5403	12.7329	1.45246	6.39063	0.619915	3
CC_OL_019_L06	0.139038	40.8778	-0.0577803		0.12206		-0.0552078		-0.0739996		0.32013	40.5623		3
CC_OL_019_L07	0.166917	12.0207	-0.0665148		0.0978418		0.0321913		0.232377	42.1044	0.407879	12.1023	45.0807	3
CC_OL_019_P05	-0.0913119		-0.132934		-0.119992		-0.134219	46.4198	-0.127472	24.385	-0.459967	5.33638	18.3434	3
CC_OL_020_A12	-0.0965037		0.00415607		0.00956926		0.183231	46.4198	-0.0255759		-0.105315			3
CC_OL_020_A16	-0.102496		-0.0635818		0.161422		0.167238	42.6069	-0.135723	42.1044	-0.426971	25.9325	32.8143	3
CC_OL_020_A24	-0.0294		0.208639		-0.0279844		0.0321394		0.0713559		0.038726			3
CC_OL_020_B15	-0.186219		-0.235234	40.2379	0.0400568		-0.144633		0.00478497		0.0639646			3
CC_OL_020_C03	0.17172	10.3357	0.226794		-0.00685698		0.059562		-0.0311561		-0.471168	6.39063	2.09221	3
CC_OL_020_C24	0.0494398		0.34336		0.18933	46.9822	0.170345	49.7484	-0.0655912		0.264134	15.0033		3
CC_OL_020_D02	-0.108442		0.108657		-0.0176557		-0.0586793		-0.100203		-0.0246893			3
CC_OL_020_D10	-0.046813		-0.347918	21.9863	-0.245721	14.9963	-0.225479	31.3506	0.00962802		0.138636	22.3838	27.6504	3
CC_OL_020_E01	0.91301	0	0.518734	28.7086	0.00357579		0.0313182		-0.0368383	37.6844	-0.341866	15.0033	0	3
CC_OL_020_E02	1.01285	0.959265	0.576976	34.5567	0.262453	26.8456	0.296127		0.0237313		-0.0628935		0.760804	3
CC_OL_020_E04	0.173925	22.2561	0.102358		0.0639967		-0.0471144		-0.110665		0.0878704		29.2653	3
CC_OL_020_E07	0.450582	3.31382	0.283654		0.0665585		0.05971		0.0901529		-0.0302177	47.0896	12.5609	3
CC_OL_020_G04	1.03194	0.714747	0.29408		0.488521	14.9963	0.242827	46.4198	0.544706	28.6663	0.458183	12.1023	15.7073	3
CC_OL_020_J06	0.0293917	40.8778	-0.00477878		0.16586		-0.0393718		-0.19044		0.190997	15.0033		3
CC_OL_020_J10	0.230182	3.78856	0.227827		0.116589	42.2193	0.130839	38.5493	0.152016	42.1044	0.0730474	44.0973	29.2653	3
CC_OL_020_J15	0.133848	19.0265	0.14005		-0.0408512		-0.0458771		0.103349		0.0772053	40.5623		3
CC_OL_020_K02	0.144822	33.7527	-0.0462913		-0.0393418		0.145172		0.0547408		-0.599415	8.05179	15.7073	3
CC_OL_020_K06	-0.0216012	37.5172	0.26921		0.187697	37.2031	-0.0206958		0.290604	42.1044	0.176486	18.8282		3
CC_OL_020_P21	-0.128978	48.3647	0.043265		0.00340069		0.0197954		0.0666858		0.0906457	40.5623	46.6954	3
CC_OL_021_C06	-0.0920099		0.0652368		0.114902	46.9822	0.110989	49.7484	-0.00958058		0.151219	18.8282	41.6943	3
CC_OL_021_C16	-0.142341	22.2561	-0.192848		-0.432093	14.9963	-0.157751	31.3506	-0.412832	8.3482	-0.4453	29.5603	31.0409	3
CC_OL_021_D11	-0.0628073				0.0281915		-0.135921		0.038864		0.0200424			3
CC_OL_021_I11	0.257562	13.6381	-0.0135194		-0.0897519		-0.241717	26.4536	-0.272396	19.8042	0.194869	40.5623	48.4602	3
CC_OL_021_L20	0.0572082		-0.247949	31.8463	0.424809		-0.361658		0.0394686		-0.935327	40.5623	48.4602	3
CC_OL_021_M21	0.00265745		-0.121714		-0.0361267		0.126481		-0.120832		0.10148			3
CC_OL_021_N15	-0.261542		-0.128564		0.165342	37.2031	0.122361		-0.365748		0.289486	33.2771		3
CC_OL_021_O12	0.38496	4.63086	0.132919		0.159268	42.2193	0.123281		0.292707	42.1044	0.4691	12.1023		3
CC_OL_022_A15	-0.088699		-0.0859113		0.0510331		-0.0943731		-0.279097	34.569	-0.240141	12.1023	22.1877	3
CC_OL_022_D09	0.174654	8.31651	0.165408		0.213301		-0.00768547		-0.116932		-0.578957	9.83445	2.84897	3
CC_OL_022_F04	0.0312088		-0.15135		0.120731		0.0363885		-0.00334166		0.149038	49.9057		3
CC_OL_022_G12	0.0182995		-0.0154544		0.0549029		0.0348112		0.0149022		-0.0100376			3
CC_OL_022_G13	0.161719	25.8116	0.0149942		0.0571976		-0.0436907		-0.204322	37.6844	-0.392107	8.05179	5.93671	3
CC_OL_022_G23	-0.00825455		0.00551394		0.000282613		0.0738803	49.7484	0.0310127	46.4921	-0.302219	15.0033	36.5087	3
CC_OL_022_I13	0.212852	10.3357	-0.401345	17.2634	-0.119692		-0.0073181		-0.33746	9.79633	0.404148	6.39063		3
CC_OL_022_I22	0.195978	12.0207	0.297869		0.0738438		0.0405918		0.297839	37.6844	-0.172327		14.3906	3
CC_OL_022_K03	-0.0807733		0.167431		0.0198303		0.0224681		0.0690449		0.360244	18.8282	31.0409	3
CC_OL_022_L06	-0.00872872	40.8778	0.304844		0.0702595		-0.00385242		-0.183849	34.569	-0.494976	2.33695	1.62381	3
CC_OL_022_L23	0.147115	37.5172	0.22889		0.449279	29.8948	-0.318846	17.4104	-0.100754		-0.478272	4.14154	3.97255	3
CC_OL_022_N02	0.182685	48.3647	-0.590792		0.0736831		0.145405		-0.249559	46.4921	0.103798			3
CC_OL_022_N14	0.383523	22.2561	0.246067								0.156298	40.5623		3
CC_OL_022_P07	-0.298989		0.0702837		0.109108		-0.0959452		0.0848098		-0.363292	33.2771	48.4602	3
CC_OL_022_P23	-0.477635	4.63086	-0.495349	8.50522	-0.370647	4.42277	-0.644725	2.02637	-0.638518	4.43055	0.0473294	49.9057	43.4785	3
CC_OL_023_A16	0.256929	13.6381	0.0607709		0.0936515		0.107868	49.7484	-0.352298		-0.497406		17.0611	3
CC_OL_023_B13	-0.0889428	33.7527	-0.0264441		0.136389		0.244551	28.1875	-0.158309	42.1044	0.18064	33.2771	38.2545	3
CC_OL_023_C12	0.326234	19.0265	0.293638		0.0152317		-0.0278293		0.115953		0.0108464		12.5609	3
CC_OL_023_D05	0.380515	12.0207	0.13401		-0.189625		-0.314645	6.78638	0.145523		0.451228	6.39063		3
CC_OL_023_H18	0.233615	48.3647	-0.0221249		0.116701		-0.191853	49.7484	0.262836	42.1044	0.0439314		48.4602	3
CC_OL_023_J02			0.625898		0.164252						-0.204635	22.3838		3
CC_OL_023_K08	0.351279	6.38553	0.310941		0.136454		0.0926886	42.6069	0.0541862		0.174016	18.8282	34.526	3
CC_OL_023_K19	0.343244	13.6381	0.211087		0.209235		-0.199779	26.4536	0.029372		0.253482		18.3434	3
CC_OL_023_K24	0.396026	5.5422	0.17536		-0.0956635		-0.0784085		-0.139682		0.3555	15.0033	45.0807	3
CC_OL_023_L14	0.133902	19.0265	0.168853		0.227453	26.8456	0.0625258		-0.117544		0.0910311	49.9057	25.8284	3
CC_OL_023_L21	0.169713	25.8116	-0.0680119		0.0919054		0.0369312		0.244929		-0.144979		46.6954	3
CC_OL_023_N01	0.573728	2.2718	0.077429		0.140946		0.258152	28.1875	0.0194726		0.754018	3.22942		3
CC_OL_023_N02			0.305218		0.421853	46.9822	-0.454767	42.6069	0.337685		-0.25003	25.9325		3
CC_OL_023_O03	-0.00878906	44.9968	-0.202831	34.5567	0.0260511		0.102823		-0.105311	42.1044	0.0391843	47.0896		3
CC_OL_023_O06	0.0440614	25.8116	-0.0933841		0.353947		-0.0827526		-0.200696	42.1044	-0.0313237		22.1877	3
CC_OL_023_P02	0.451923	1.68564	0.373511	49.244	0.0253456		0.0502055		-0.379243	16.4559	1.00982	6.39063		3
CC_OL_024_B17	0.386617	1.68564	0.0993308		0.274984	23.4001	0.0947141		-0.383301	28.6663	-0.154554		12.5609	3
CC_OL_024_B18	0.280205	19.0265	0.147979		-0.1521		-0.131759		-1.07781	0	-0.569518	12.1023	0.760804	3
CC_OL_024_C22	-0.600972	2.32496	-0.745304	4.59109	-0.787268	4.42277	-0.67362	3.62885	-0.144276	42.1044	-0.12392		19.7483	3
CC_OL_024_F04	0.0649705	37.5172	0.0579654		0.202024	46.9822	-0.0653498		-0.231647	46.4921	-0.223686	29.5603	19.7483	3
CC_OL_024_F06	-0.153021		0.215502		0.167942		0.0797682		-0.271811		-0.250317		40.0133	3
CC_OL_024_I23	0.239948	12.0207	0.0955281		0.14554		-0.0358436		-0.205065		-0.0167088		24.012	3
CC_OL_024_J02			-0.0534623		-0.0230057				0.158783		-0.262557			3
CC_OL_024_O17	0.17393	29.718	0.299603		0.251485	26.8456	0.185377	24.6475	0.276464	37.6844	0.662068	8.05179	27.6504	3
CC_OL_024_O24	0.0872199	37.5172	0.100405		0.0040242		-0.00607166		-0.151078	34.569	-0.288298	15.0033	7.26894	3
CC_OL_024_P24	-0.151714		-0.161717		0.41411	29.8948	-0.120081	42.6069	-0.605657	28.6663	-0.519144	4.14154	12.5609	3
CC_OL_025_C09	0.127093	44.9968	-0.093575		-0.242376	11.0134	-0.156661	49.7484	0.0058211		0.176747	33.2771		3
CC_OL_025_D23	0.133359	25.8116	-0.153566	49.244	0.31357	20.3752	0.220061	26.4536	-0.0487824		-0.137701			3
CC_OL_025_E09	0.107345		0.0391519		0.0929704	46.9822	0.0931197		-0.137365	37.6844	0.00888301	49.9057	36.5087	3
CC_OL_025_F18	-0.0367671		-0.0987975		-0.331442		-0.286866	28.1875	0.0208837		-0.0097331			3
CC_OL_025_G15	0.0731114	29.718	0.129184		0.124162		0.0932551	49.7484	0.234702	37.6844	0.323075	22.3838	38.2545	3
CC_OL_025_I02	0.552805	3.78856	-0.258671		0.119776	42.2193	0.0900965				-0.097831	49.9057	22.1877	3
CC_OL_025_J16	-0.0263872		0.0237887		-0.184275		-0.108636	46.4198	-0.0797051		-0.0548601		46.6954	3
CC_OL_025_J18	0.107452		-0.00890392		-0.247327	37.2031	-0.290057	6.78638	0.1633		-1.08095	1.07563	11.557	3
CC_OL_025_K18	0.259869	7.17452	0.0871777		-0.0322076		0.0912782	46.4198	-0.186343	34.569	0.165098	47.0896	31.0409	3
CC_OL_025_K20	0.50092	8.31651	0.427127	45.1357	-0.0566802		0.168758		-0.149796		0.137683	25.9325	18.3434	3
CC_OL_025_M12	0.170277	8.31651	0.109594		-0.0004167		0.0923111		-0.200367	26.3119	-0.397909	3.22942	0.760804	3
CC_OL_025_N04	0.0994794	33.7527	0.127566		0.107596	46.9822	0.0739678		-0.242848	14.9433	0.0535854		25.8284	3
CC_OL_025_P03	0.608775	1.68564	0.291026		-0.224281		-0.0780989		0.139671	46.4921	0.0671458	40.5623	15.7073	3
CC_OL_025_P06	0.335197	2.91035	0.283219				0.2059	49.7484	-0.0291524		-0.0474169		20.8934	3
CC_OL_026_A08	-0.0151219		-0.0519734		-0.0347153		0.0333803		-0.237538	37.6844	-0.90161	0.363199	2.84897	3
CC_OL_026_A24	0.139116	22.2561	0.178979		-0.0045495		0.0102856		-0.60435	0	-0.266444	22.3838	0.760804	3
CC_OL_026_B21	0.0284068		-0.0765041		0.0625929		0.239309	26.4536	-0.184349		-0.221547	47.0896	31.0409	3
CC_OL_026_B23	0.332634	7.17452	0.230834		-0.0537912		-0.0275956		-0.097254	46.4921	-0.139266	40.5623	2.09221	3
CC_OL_026_D11	-0.1264		0.218329		0.265825	23.4001	0.0561335		-0.363008		-0.370152	18.8282	14.3906	3
CC_OL_026_G05	0.274919	7.17452	-0.101923		-0.0203667		-0.0383277		0.0600859		0.589396	12.1023	48.4602	3
CC_OL_026_I05	0.173317	19.0265	0.138758		0.170756		0.173427	46.4198	0.125135		0.333639	37.1539	38.2545	3
CC_OL_026_J20	0.0936385	19.0265	0.0129945		-0.0827337		0.157312		-0.106263		-0.301615	8.05179	7.26894	3
CC_OL_026_N20	0.143772	19.0265	0.0225283		0.211105		0.0321295		-0.0538561		-0.0684133		17.0611	3
CC_OL_026_O04	-0.605929	1.85743	-0.694998	0	-0.982245	0	-0.964809	0	-0.942967	1.56915	-0.540243	40.5623	48.4602	3
CC_OL_026_P22	0.155291	40.8778	0.167717		-0.147849		0.151202		0.0920568	42.1044	0.028322	49.9057		3
CC_OL_027_B19	-0.954761	1.85743	-1.60244	0	-1.17284	2.38721	-1.81249	0	-1.25653	6.05829	-0.513687		40.0133	3
CC_OL_027_C23	0.0652438		-0.0353653		-0.0445834		-0.0877795		-0.375711	12.7329	-0.106052		29.2653	3
CC_OL_027_D04	0.104147	29.718	-0.176296		0.115335		-0.093143		-0.15429	46.4921	0.128855	22.3838		3
CC_OL_027_F16	0.863227	1.402	-0.192373		0.531496	8.15431	-0.00476562		0.292038	26.3119	0.247339	25.9325	24.012	3
CC_OL_027_I06	0.160076	12.0207	0.0219537		-0.0234328		-0.0055208		0.221218	42.1044	0.558679	8.05179	40.0133	3
CC_OL_027_I24	0.00365575		0.334109		-0.0990668		-0.250821	17.4104	-0.000705035		-0.041933	29.5603		3
CC_OL_027_J18	0.232481	15.9625	-0.0357924		0.037014		-0.00713449		0.294646	37.6844	0.337437	12.1023	45.0807	3
CC_OL_027_L02	0.0772239	40.8778	-0.240611	24.3011	-0.161136		-0.142724	28.1875	0.0635193		0.207152	40.5623	45.0807	3
CC_OL_027_L04	0.262755	7.17452	-0.139264		0.0763388		0.0741534	46.4198	0.00553721		0.278646	22.3838		3
CC_OL_027_L05	0.0958421	22.2561	-0.208482	45.1357	0.000785972		-0.0901435		0.322433	46.4921	0.309124			3
CC_OL_027_N15	0.107446	19.0265	0.160087		0.107765		0.135757		0.00281658		0.0471738	49.9057	46.6954	3
CC_OL_027_N24	-0.280637	40.8778	0.060739		0.145116		0.287635	26.4536	0.0834888		0.520894	15.0033	40.0133	3
CC_OL_027_O01	0.346098	2.2718	0.269329		0.0807404		-0.0397207		0.278662	46.4921	-0.757428	25.9325	10.2741	3
CC_OL_027_O11	0.205674	19.0265	-0.0516013		-0.042626		0.00112702		-0.119225	37.6844	-0.239477	44.0973	11.557	3
CC_OL_027_O13	0.639868	1.81354	0.239989		-0.0163768		-0.163625	28.1875	-0.983339	1.23474	-0.609512	18.8282	0	3
CC_OL_027_P04	0.128562	40.8778	-0.135684		-0.191788		0.00117565		-0.306007	37.6844	0.135965	37.1539		3
CC_OL_027_P24	0.30461	15.9625	0.098052		0.024983		0.0500128		-0.0947262		0.0261569		24.012	3
CC_OL_028_C13	0.140439	37.5172	0.0398308		0.0837927		0.0641792		-0.0148795		-0.0373278		46.6954	3
CC_OL_028_D11	0.227644	13.6381	-0.0557265		0.0537419		-0.0969768		-0.0500586		-0.12197	40.5623	12.5609	3
CC_OL_028_E18	0.358254	12.0207	0.209817		0.118066		0.0451998		-0.280336		-0.315032	22.3838	4.35452	3
CC_OL_028_G20	0.148388	25.8116	0.31445		-0.0245469		-0.0358763		0.112579		-0.251553		27.6504	3
CC_OL_028_H09	-0.0118311	44.9968	0.0773443		-0.122612		-0.06243		-0.0356564		0.198692	33.2771		3
CC_OL_028_H13	0.12648		0.0564965		-0.112752		-0.206333	38.5493	0.0746501		-0.198342	22.3838	24.012	3
CC_OL_028_J03	0.0915358	40.8778	-0.165764		-0.168003		0.0361961		-0.173406	37.6844	-0.210544	25.9325	22.1877	3
CC_OL_028_N18	-0.0806641		-0.155872		-0.421128		0.0832577		-0.21663	46.4921	-0.638403	1.07563	48.4602	3
CC_OL_028_N23	-0.204378	40.8778	-0.137526		-0.702588	0	-0.56711	0	-0.573889	6.05829	0.134994	44.0973		3
CC_OL_028_O04	0.145275	15.9625	0.207168		0.138877	46.9822	0.127084	49.7484	0.231532	42.1044	0.207167	15.0033		3
CC_OL_028_O05	0.792081	2.10777	0.342351		0.0612197		0.0653592		-0.22133		-0.509064	5.33638	0.760804	3
CC_OL_028_O15	0.382374	1.68564			-0.119452		0.0255824		-0.295439	16.4559	-0.775549	25.9325	0.760804	3
CC_OL_028_O16	0.0247579		0.0645652		-0.00702244		0.0107325		0.113694		-0.0324355			3
CC_OL_029_B02														3
CC_OL_029_B09	0.141868	22.2561	0.0210594		0.067173		-0.026284		0.293371	34.569	0.275226	12.1023	25.8284	3
CC_OL_029_B22	0.431654	7.17452	0.174695		0.469709	26.8456	0.0643185		0.0897544		0.0341476		22.1877	3
CC_OL_029_E19	0.200913	10.3357	-0.107793		0.15108	33.8404	-0.0188481		-0.580056	1.56915	-0.410103	2.6814	0.760804	3
CC_OL_029_F08	0.169255	13.6381	0.130877		0.0914426	46.9822	0.189435	26.4536	-0.0348715		-0.242544	22.3838	8.07623	3
CC_OL_029_F21	-0.424121	1.402	-0.543425	8.99347	-0.514795	0	-0.482193	0.631292	-0.77595	1.56915	0.0702462	18.8282	45.0807	3
CC_OL_029_F23	0.0300276		-0.148574		0.139463	42.2193	0.332863		0.0494564		0.184873	29.5603		3
CC_OL_029_F24	0.450236	2.32496	0.385008	45.1357	0.237739	46.9822	-0.0880064		-0.0222464		-0.262021		2.56407	3
CC_OL_029_G02	-0.189572	19.0265	-0.169515		-0.525702	2.38721	-0.536145	2.02637	-0.283043	16.4559	0.317498	12.1023	46.6954	3
CC_OL_029_G11	0.130827	29.718	-0.0804158		0.0743945		-0.0399412		0.0464392		-0.0369462			3
CC_OL_029_H10	-0.07798		-0.0647226		0.0549254		0.133411	46.4198	-0.171743	37.6844	-0.106314	40.5623	40.0133	3
CC_OL_029_I14	0.472195	2.32496	-0.34156		0.0790492		-0.122853	28.1875	-0.212679		0.0381831	33.2771		3
CC_OL_029_J06	-0.0632474		0.00241735		-0.0943739		0.0512281		-0.39206	6.05829	-0.491476	9.83445	11.557	3
CC_OL_029_M13	-0.0321814		-0.317232	49.244	-0.770102	7.65896	-0.163442	42.6069	-0.635612	1.86742	0.169844			3
CC_OL_029_N17	0.382804	3.78856	0.220994		0.267044	23.4001	0.170254	38.5493	0.0264876		0.345664	6.39063	32.8143	3
CC_OL_029_P11	0.0112829				-0.256913		-0.201915	28.1875	-0.108875		0.193853	12.1023		3
CC_OL_030_A09	-0.0788963		0.202189		0.0606813		0.203797	31.3506	-0.102107		0.0462148		22.1877	3
CC_OL_030_C09	0.0450724	44.9968	-0.0917382		-0.144734	42.2193	-0.219993	31.3506	-0.0848249	42.1044	-0.215758	29.5603	24.012	3
CC_OL_030_C19	-0.244917		-0.545883		-0.238316	20.3752	-0.28217	10.4046	0.00722462		0.181533	15.0033	31.0409	3
CC_OL_030_D01	0.0633937	37.5172	0.238842		-0.0595599		0.00748839		0.150428		0.410772	22.3838		3
CC_OL_030_D06	0.116905	25.8116	0.0868934		0.033684		-0.153128	46.4198	0.0158022		0.23428	37.1539		3
CC_OL_030_D13	0.0494031	48.3647	0.110656		0.144677		0.0865025		-0.0763273		-0.0392156			3
CC_OL_030_G05	0.168514	19.0265	0.174532		0.0222629		0.00934012		-0.281005	12.7329	-0.769334	1.19021	0.760804	3
CC_OL_030_G22	-0.0469212		0.119437		0.217771	37.2031	0.0927058		-0.0940668	28.6663	0.200041	25.9325		3
CC_OL_030_J16	-0.0396043		-0.154967		0.0535113		0.056203		-0.0794665		-0.0559602			3
CC_OL_030_J17	-0.498757	7.17452	-0.258004		-0.688249	1.52446	-0.628579	0.631292	-0.538533	1.86742	-0.35061	29.5603		3
CC_OL_030_K17	0.375515	5.5422	-0.014956		0.0748166		0.077099		0.137944		0.225072	33.2771	46.6954	3
CC_OL_030_L08	-0.0790564		-0.123852		-1.62848e-05		-0.021155		0.139401	46.4921	-0.0801958			3
CC_OL_030_N11	-0.656991	1.402	-1.00183	0	-1.12036	1.8358	-1.17702	0	-0.890031	6.05829	0.0959378	47.0896	24.012	3
CC_OL_030_O20	-0.0714897		-0.102115		0.000637713		-0.00774827		-0.0573426		0.242503	47.0896	48.4602	3
CC_OL_031_A06	0.159613	15.9625	-0.364912	12.0608	0.0908855	46.9822	0.0812527	46.4198	0.321829	37.6844	0.103881			3
CC_OL_031_B19	0.074555	44.9968	0.046111		-0.0645282		0.0897385		-0.123255	34.569	0.185954	25.9325		3
CC_OL_031_C17	0.07107	25.8116	-0.00447242	45.1357	0.0722251		0.197641		0.270837	34.569	-0.296656	22.3838		3
CC_OL_031_C22	-0.0361079		0.154955		0.269533	26.8456	0.151818	42.6069	-0.0942149		0.137366	18.8282		3
CC_OL_031_D15	0.488563	2.32496	0.0530185		0.259871	37.2031	0.0949201		-0.308699				1.62381	3
CC_OL_031_E05	0.266502	5.5422	0.0478816		-0.0412315		0.0110085		-0.133862	42.1044	0.189768	15.0033	49.9559	3
CC_OL_031_H16	0.259287	6.38553	0.0688791		0.158935		0.0171321		-0.136239	42.1044	0.219914	37.1539	24.012	3
CC_OL_031_I24	0.162	48.3647	0.0643107		-0.369405	14.9963	-0.273526	14.0943	-0.142166	37.6844	0.22307	15.0033		3
CC_OL_031_K16	-0.0535695		-0.277615	19.9555	0.00994878		-0.0520276		-0.0296368		0.0959973		40.0133	3
CC_OL_031_K22	-0.0355639		0.0871423		0.0721921		0.0074943		-0.0626309		0.309527	9.83445	32.8143	3
CC_OL_031_L10	0.0908099	40.8778	0.0199818		0.344294	23.4001	0.0376541		0.0572247		0.247079	18.8282		3
CC_OL_031_O18	0.558527	2.2718	0.369718		0.190683		-0.157131		0.0960913		-0.324742	49.9057	2.09221	3
CC_OL_031_P01	-0.102915	44.9968	0.060752		0.280958	26.8456	-0.079813		-0.172494	21.4061	0.517903	33.2771	32.8143	3
CC_OL_031_P08	0.0497629	48.3647	-0.210408	37.0587	0.00151794		-0.211185		-0.0620782		-0.306278		36.5087	3
CC_OL_032_B02														3
CC_OL_032_B17	-0.0845494		0.194063		0.195605	26.8456	0.0692109	49.7484	0.265378	34.569	0.0154688		38.2545	3
CC_OL_032_C08	0.182893	12.0207	0.00194947		0.0924645		0.276541	34.9677	-0.3291	31.2984	-0.16721	40.5623	17.0611	3
CC_OL_032_E02	0.107411	44.9968	0.518596											3
CC_OL_032_F03	0.164407	29.718	-0.0201685		-0.189429	46.9822	-0.118212	34.9677	-0.147039		0.563006	9.83445	36.5087	3
CC_OL_032_F04	0.234485	15.9625	0.010384		-0.147844		-0.19232		-0.290063	16.4559	0.203997	22.3838	36.5087	3
CC_OL_032_F08	-0.176296		0.0338196		-0.0966104		-0.138757		0.0504429		0.204804	22.3838	34.526	3
CC_OL_032_F15	-0.192116	29.718	-0.131957		-0.439726	6.72025	-0.2389	8.91472	-0.120403		0.405234	15.0033	20.8934	3
CC_OL_032_I15	0.259708	19.0265	0.352914		0.0130267		0.107053		-0.0195276		-0.368793	15.0033	3.38315	3
CC_OL_032_J15	0.324004	3.31382	-0.113489		-0.192281		-0.102669		-0.576468	7.15844	0.0130924	40.5623	45.0807	3
CC_OL_032_J18	0.0364288		-0.223745		0.14556		-0.170933		0.0164353		-0.0878447	49.9057		3
CC_OL_032_K23	0.0803029	44.9968	-0.0487914		0.0155653		-0.101298		0.0213971	37.6844	0.095079	37.1539	48.4602	3
CC_OL_032_L11	0.0166595		-0.117477		-0.0627736		-0.0891624		-0.130176		-0.135343		46.6954	3
CC_OL_032_N05	0.127972	29.718	-0.0546144		-0.165226		-0.239136	28.1875	-0.379679	16.4559	0.636941	9.83445	46.6954	3
CC_OL_032_P09	0.182101	19.0265	-0.156796		-0.00185539		-0.0373952				0.360149	33.2771		3
CC_OL_032_P18	0.0541733	44.9968	0.00480157				0.00995515		0.579449	37.6844	-0.0236152			3
CC_OL_033_D02	0.332339	8.31651	0.305752		-0.00774651		0.0879864		-0.523935	12.7329	-0.63768	15.0033	0.760804	3
CC_OL_033_D20	0.139518	37.5172	-0.210763	49.244	-0.0483854		-0.106418		-0.00697088		-0.0290883			3
CC_OL_033_G21	0.0934959	29.718	-0.0667503		-0.0181422		0.00874927		0.0897722		0.00730652		41.6943	3
CC_OL_033_H06	0.0879082	22.2561	0.0634141		0.559903	4.42277	0.570384	15.5702	-0.076344		-0.254898	40.5623	17.0611	3
CC_OL_033_I04	0.429906	6.38553	0.16984		0.0958727		0.156746	42.6069	0.50797	34.569	0.319506	18.8282		3
CC_OL_033_K01	0.180138	22.2561	0.0661989		0.0493291		0.0144763		-0.360213	37.6844	-0.0416137		8.87849	3
CC_OL_033_K18	0.836768	0.959265	0.223966		0.0507129		-0.0365637		0.33731		-0.797203	22.3838	2.84897	3
CC_OL_033_M13	0.415416	3.78856	0.111398		-0.402067	46.9822	-0.361432	15.5702	-0.686126	1.23474	-0.832981	3.31894	0.760804	3
CC_OL_033_N18	0.0805955		0.227341		-0.0925676		-0.189056		-0.481776	31.2984	-0.202492		36.5087	3
CC_OL_033_P21	0.190088	7.17452	0.0606939		-0.0647323		0.0673229		0.235315	42.1044	-0.405527	29.5603	18.3434	3
CC_OL_034_A03	0.317321	8.31651	0.044557		0.0297487		0.00732848		-0.153473	31.2984	0.256589	12.1023	32.8143	3
CC_OL_034_A18	-0.0885535		-0.0727456		-0.178422	42.2193	-0.0914395		-0.199033	28.6663	-0.820495	8.05179	6.34878	3
CC_OL_034_C22	0.00598008		-0.100727		0.0772106		-0.088171	46.4198	-0.283326	21.4061	-0.0468033		31.0409	3
CC_OL_034_E08	0.115684	33.7527	0.168242		0.0678924		-0.078347		0.186824	37.6844	-0.186441		34.526	3
CC_OL_034_E19	0.181181	10.3357	0.151953		0.0657952		-0.0657417		-0.134402		0.00426134	47.0896		3
CC_OL_034_F11	0.196681	15.9625	-0.00540204		-0.066583		-0.0663704		0.199259	42.1044	0.113916			3
CC_OL_034_F20	0.113853	40.8778	-0.0748134		0.13098		-0.0104055		0.286351	46.4921	-0.246287			3
CC_OL_034_G09	0.14378	25.8116	-0.140119		0.0955429		-0.124053		-0.00440003		0.266307	15.0033		3
CC_OL_034_H14	0.150268	19.0265	0.330378		0.124769		-0.0325232		-0.272261	28.6663	0.11041	25.9325	12.5609	3
CC_OL_034_I01	0.747657	1.68564	0.208519		0.427387		-0.178589	31.3506					22.1877	3
CC_OL_034_I06	-0.0843443		-0.114672		-0.0524696		0.0929172	49.7484	0.0590928		-0.182368			3
CC_OL_034_I08	-0.205397	44.9968	-0.0870747		0.215204	23.4001	-0.00045783		0.55321	31.2984	0.0939843		40.0133	3
CC_OL_034_I16	0.107145	25.8116	0.0718794		-0.380157	16.7058	0.0769741		-0.451826	16.4559	0.0793929	44.0973	43.4785	3
CC_OL_034_I24	0.110873	40.8778	0.046109		0.0252343		-0.102702	49.7484	0.125415		1.02196	8.05179	25.8284	3
CC_OL_035_D22	0.124885		0.192616		-0.193185		-0.206564		0.0231724		0.182983	25.9325		3
CC_OL_035_I21	0.385808	8.31651	0.417479		-0.224767	20.3752	-0.127623		0.347752	34.569	0.615627	12.1023		3
CC_OL_035_M19	0.16312	8.31651	-0.0379596		-0.22086		-0.0119025		-0.611482	26.3119	-0.193438	37.1539	18.3434	3
CC_OL_035_O05	0.17898	19.0265	0.208274		0.192346		-0.0451926		0.0576189		-0.185633		8.87849	3
CC_OL_001_A14	-0.0291084		-0.211175		-0.231945		-0.129119		-0.216587	42.1044	0.18315	47.0896		4
CC_OL_001_C17	0.0982412	25.8116	0.0503814		0.153256		0.00429055		-0.326812	37.6844	-0.154201	33.2771	8.87849	4
CC_OL_001_D06	0.196425	44.9968	0.15208		0.160743	42.2193	0.0923559		-0.244338	24.385	-0.170317		8.07623	4
CC_OL_001_D08	0.0536378		-0.0160743		0.056847		-0.0869216		0.035683		0.159569	40.5623		4
CC_OL_001_E02	0.228838	13.6381	0.0189114		0.0900363		0.177382	46.4198	-0.050097		-0.138473		27.6504	4
CC_OL_001_E20	0.00542651		0.0179136		0.054853		0.0254415		-0.0906631	46.4921	-0.782319	2.6814	3.38315	4
CC_OL_001_F16	-0.51508	22.2561	-0.18997		0.371044	20.3752	0.120273	49.7484	0.435622	37.6844	-0.146243		36.5087	4
CC_OL_001_G15	-0.0840769		-0.114227		0.31637	18.2822	0.151482	31.3506	-0.174806	46.4921	-0.600379	3.22942	10.2741	4
CC_OL_001_G22	0.289913	7.17452	0.179445		0.0965569		0.0536065		-0.208023	28.6663	-0.631687	2.6814	0.760804	4
CC_OL_001_I13	0.435974	2.91035	0.282796		0.387067	42.2193	0.213807	38.5493	-0.234225	28.6663	-1.26936	0.835227	0.760804	4
CC_OL_001_J21	0.207707	15.9625	0.08855		0.184417	26.8456	0.293759	24.6475	0.202514	37.6844	-0.373568	15.0033	20.8934	4
CC_OL_001_M24	0.21947	19.0265	0.157919		0.204168	37.2031	0.116277	49.7484	-0.285527	26.3119	-0.702698	1.35943	2.56407	4
CC_OL_001_O08	-0.102984		-0.0607195		0.0684665		0.0235319		-0.0230485		-0.099196			4
CC_OL_001_P01	0.205489	19.0265	0.310909		0.0546544		-0.0119728		0.209409	37.6844	-0.222055	18.8282	25.8284	4
CC_OL_001_P22	0.111262	37.5172	-0.0179159		0.104697		0.0479537		0.281721	37.6844	0.146183	49.9057		4
CC_OL_002_C24	0.218618	22.2561	0.155581		-0.0392956		0.0956786	46.4198	-0.0491101		0.341781	18.8282		4
CC_OL_002_D01	0.0694446		0.0137808		0.14336		0.216506	34.9677	0.200934	42.1044	-0.528259	1.19021	48.4602	4
CC_OL_002_D02	-0.0424633		0.0653019		0.101152		0.19505		-0.275996	17.9191	-0.219378	22.3838	8.87849	4
CC_OL_002_D08	0.164065	13.6381	-0.0180546		-0.0647986		-0.0843671		-0.0939477		0.287106	15.0033		4
CC_OL_002_D13	0.00411897		0.0287906		-0.0221582		0.0527901		-0.0429051		-0.0616067			4
CC_OL_002_D15	-0.0562421		0.103155		0.0857626		-0.0341823		0.0325518		-0.330945	18.8282	27.6504	4
CC_OL_002_E01	0.305546	7.17452	0.117795		0.00386747		0.071523		0.530365	37.6844	-0.0805575	47.0896		4
CC_OL_002_E16	0.0208191		0.185941		0.109774	46.9822	0.0537563		0.0253716		-0.0069423		31.0409	4
CC_OL_002_E17	-0.0519882		-0.138703		-0.0215463		0.054947		-0.152215	46.4921	-0.16897	33.2771	20.8934	4
CC_OL_002_E18	-0.00802001		-0.0189689		0.184846	26.8456	0.191039	24.6475	0.0273541		-0.391671	22.3838	45.0807	4
CC_OL_002_E20	0.290369	7.17452	-0.0400181		0.0328259		0.0188315		0.268365	37.6844	0.0810247	44.0973		4
CC_OL_002_F01	-0.0165588		-0.0120605		0.140182	42.2193	0.198801		0.0960208	46.4921	0.128139	33.2771	49.9559	4
CC_OL_002_G06	0.36759	2.2718	0.377036		-0.0919275		2.55855e-05		0.127588		-0.0779753		12.5609	4
CC_OL_002_H01	-0.0776808		-0.237779	49.244	0.0146435		-0.0194487		-0.0294066		-0.585265	8.05179	27.6504	4
CC_OL_002_H07	0.13353	22.2561	0.179552		0.212099		0.160254		-0.00452338		-0.68017	3.22942	4.35452	4
CC_OL_002_H14	-0.106977		-0.0864251		0.192596	26.8456	0.132787		-0.00597456		-0.0436741	49.9057		4
CC_OL_002_H20	0.226748	22.2561	0.141519		0.404656	46.9822	0.00824132		-0.039176		-0.0761281	49.9057	18.3434	4
CC_OL_002_K17	0.287404	19.0265	0.225119		0.065403		-0.137546	38.5493	0.087751		-0.469419	12.1023	0.782135	4
CC_OL_002_K23	-0.0275996		0.141749		0.178001		-0.0514636		-0.191425	42.1044	-1.01608	0	1.65311	4
CC_OL_002_N12	-0.0100954		-0.051731		0.0634377		-0.0331517		0.102045		0.267852	25.9325	32.8143	4
CC_OL_002_N18	-0.021648				0.160322		0.0626111		-0.535259	14.9433	0.103107			4
CC_OL_002_N19	0.113035	37.5172	0.0602616		0.185085	37.2031	0.072098	46.4198	-0.274508		-0.971128	9.83445	6.34878	4
CC_OL_002_O07	0.529544	2.91035	0.12035		0.0780824		-0.103087	46.4198	-0.108289		0.0469174	49.9057	8.87849	4
CC_OL_002_O20	0.348561	6.38553	0.0821662		0.0138994		0.0444825		0.110228		0.383071	15.0033		4
CC_OL_002_P01	-0.0365836		-0.111776		0.272745	46.9822	-0.00479017		0.25583	37.6844	-0.675912	6.39063	19.7483	4
CC_OL_002_P12	0.310414	5.5422	0.0625921		-0.0894308		0.144144	42.6069	0.255484	34.569	-0.083413		31.0409	4
CC_OL_002_P17	0.233144	22.2561	-0.0302404		0.333333	14.9963	0.307571	14.0943	-0.218212	42.1044	-0.974019	2.33695	2.09221	4
CC_OL_002_P18	0.232651	8.31651	0.129067		0.207733	42.2193	0.0069772		0.0545886		-0.217486	44.0973	8.07623	4
CC_OL_003_B06	0.131789	25.8116	-0.0335332		0.223604		0.159826		-0.261889	28.6663	-0.607617	5.33638	2.84897	4
CC_OL_003_E19	0.107181	22.2561	-0.0775476		-0.265596	42.2193	-0.376783	15.5702	-0.14413		0.46919	12.1023		4
CC_OL_003_F14	-0.120721		-0.0813313		0.298916	46.9822	0.173629	38.5493	0.241047				40.0133	4
CC_OL_003_H02	0.295256	13.6381	0.527704		-0.043025		0.0619791		0.0865787		-0.350226	18.8282	3.97255	4
CC_OL_003_K01	0.255004	15.9625	0.445978		0.0152551		0.168874	38.5493	0.250358	42.1044			8.87849	4
CC_OL_003_L06	-0.13627		-0.154366	40.2379	-0.113704		0.0475437		-0.235736	28.6663	-0.828277	8.05179	12.5609	4
CC_OL_003_M04	0.234932	19.0265	0.320614		-0.109261		-0.0379145		0.159504	42.1044	0.107168	37.1539	43.4785	4
CC_OL_003_P18	0.261769	29.718	0.110331		0.186416		0.0570642		0.101205		0.329059	18.8282		4
CC_OL_004_C15	0.497269	1.81354	0.118761		-0.00121592		0.00992557		-0.0393607		-0.14341	37.1539	1.65311	4
CC_OL_004_D14	0.0176647		0.12853		0.160725	37.2031	0.189636	22.1072	-0.0523697		-0.067319		43.4785	4
CC_OL_004_E09	0.0120085		0.153494		0.0771468		-0.0605163		-0.179272	26.3119	-0.055098		22.1877	4
CC_OL_004_E22	-0.226282	8.31651	-0.0886238		-0.561301	9.15258	-0.476169	0	-0.172564	46.4921	-0.00489607			4
CC_OL_004_F07	0.692005	7.17452	0.17628		-0.0627174		-0.0866943		0.271293	34.569	0.265409		36.5087	4
CC_OL_004_F18	0.493094	6.38553	0.148426		-0.0160581		0.20354	46.4198	0.0770811		-0.238673	33.2771	8.07623	4
CC_OL_004_F21	0.116871	29.718	0.00749073		0.0586759		0.147316	46.4198	-0.0530094		-0.141171		25.8284	4
CC_OL_004_G04	0.489407	1.18865	0.224912		0.119775	46.9822	0.155912		-0.060531	34.569	-0.388148	9.83445	0	4
CC_OL_004_G12	-0.028272		0.283968		0.24653		0.12904	42.6069	-0.3431		-0.681815	25.9325	22.1877	4
CC_OL_004_G13	0.533758	1.68564	0.333296		0.00548223		0.099065		0.0797171		-0.402998	6.39063	0.760804	4
CC_OL_004_G18	0.182239	10.3357	0.140992		0.51213	46.9822	-0.189522		0.565565	26.3119	0.312897	15.0033	29.2653	4
CC_OL_004_G21	-0.0104213		-0.229206	49.244	0.0126768		-0.073923		-0.0457018	42.1044	0.250736	18.8282	27.6504	4
CC_OL_004_H23	-0.138003		-0.196189	18.9828	-0.309644	9.15258	-0.0354856		0.183544		0.174703	12.1023	29.2653	4
CC_OL_004_H24	0.20533	12.0207	-0.201071		-0.109293		-0.0465154		0.0751171		-0.308785	37.1539	27.6504	4
CC_OL_004_I05	-0.297842	4.63086	-0.469641	3.77277	-0.546317	33.8404	-0.432412	0.631292	-0.502997	6.05829	-0.370454	3.31894		4
CC_OL_004_I08	0.0122904		-0.136978		-0.139416		0.0749919		0.17836	42.1044	0.144179		43.4785	4
CC_OL_004_J03	0.0388981		0.06733		0.120016		-0.00247344		0.262184	42.1044	0.314409	22.3838	36.5087	4
CC_OL_004_J11	0.0954688	22.2561	0.0563306		-0.0173445		0.029335		-0.17294	46.4921	-0.476795	2.6814	1.65311	4
CC_OL_004_J21	0.115665	22.2561	0.179465		0.135798	46.9822	0.060725		0.0578863		0.0151269	49.9057	38.2545	4
CC_OL_004_K09	0.1428	40.8778	0.0660815		0.166726		0.156054	42.6069	-0.0621432	46.4921	0.0549908		43.4785	4
CC_OL_004_L05	0.163403	10.3357	0.132247		-0.0195323		0.0804343		-0.00232575		-0.445817	25.9325	7.26894	4
CC_OL_004_N09	0.20147	15.9625	0.171075		0.309988	14.9963	0.177215	26.4536	0.0826508		0.253985	12.1023		4
CC_OL_004_N16	-0.0813886		-0.141782	49.244	-0.122103		0.0226075		0.35885	34.569	0.100496		32.8143	4
CC_OL_005_B02	0.0954109	33.7527	-0.414735		0.133795		0.189656		0.324078	42.1044	0.552827	9.83445	27.6504	4
CC_OL_005_B13	0.470987	8.31651	-0.225824	49.244	0.0956888		0.0896283		-0.082744		0.435876	29.5603		4
CC_OL_005_C02	-0.0688329		-0.0764126		-0.0144978		0.0457384		0.612271	21.4061	0.512531	25.9325	14.3906	4
CC_OL_005_E03	0.234036	10.3357	0.0283513		-0.0916261		0.16292		-0.0388577		-0.436577	33.2771	11.557	4
CC_OL_005_G01	0.155055	37.5172	0.0395303		0.136155	37.2031	0.146697	38.5493	0.143803		-0.143395	33.2771	24.012	4
CC_OL_005_H01	-0.0178333		-0.0897611		0.10229		0.137193		0.0308316		0.100612	40.5623		4
CC_OL_005_H10	0.0899676	29.718	0.158421		0.105548	42.2193	0.13863	38.5493	-0.11119	37.6844	-0.0312933		18.3434	4
CC_OL_005_I21	0.048512	44.9968	-0.0617029		-0.262573	18.2822	-0.0306883		-0.0310036		-0.337497	9.83445	29.2653	4
CC_OL_005_N10	0.166965	22.2561	0.058605		0.0807268		0.221488	42.6069	-0.0769514	42.1044	-0.327262	3.22942	8.07623	4
CC_OL_005_O13	-0.338932	15.9625	-0.0879266		-0.209412	14.9963	-0.295094	28.1875	-0.574854	0	0.514367	12.1023	34.526	4
CC_OL_006_C06	0.158598	19.0265	-0.147283		-0.0396861		-0.0760258		0.289624	42.1044	0.0970401	29.5603	49.9559	4
CC_OL_006_D14	0.225812	4.63086	0.404268		0.113004		-0.168409	49.7484	-0.163829	28.6663	-0.099067	44.0973	2.84897	4
CC_OL_006_E08	-0.141199	22.2561	-0.624927	11.3554	-1.26307	0	-0.839745	0	-0.607343	5.31916	-0.136083			4
CC_OL_006_G14	0.151716	22.2561	0.0635354		0.0716865		-0.0213997		-0.334819	17.9191	-0.251477	44.0973	6.34878	4
CC_OL_006_H13	-0.0883429		-0.0516304		-0.220975	26.8456	-0.180008	31.3506	-0.491874	5.53818	-0.475081	12.1023	7.26894	4
CC_OL_006_K06	0.712099	2.91035	0.181572		0.18902	26.8456	0.111592		0.254534	28.6663	0.448952	12.1023	43.4785	4
CC_OL_006_K19	0.0742768		-0.0182201		-0.106563		-0.0550734		-0.0584946		0.247678	18.8282	46.6954	4
CC_OL_006_N24	0.0143665		-0.0350971		-0.212981		-0.216283	38.5493	-0.608821	4.43055	-0.52307	15.0033	8.87849	4
CC_OL_007_B13	0.179221	15.9625	0.11244		0.0382003		-0.140896	38.5493	0.0234742	46.4921	-0.0922642		20.8934	4
CC_OL_007_E14	0.58642	1.402	0.388725		-0.275486		0.274509	42.6069	-0.503049	24.385	0.0672631		7.26894	4
CC_OL_007_F06	0.116253	37.5172	0.249687		-0.0461719		0.198571	42.6069	0.229816		0.45588	15.0033	46.6954	4
CC_OL_007_G08	0.0389772	44.9968	0.0490391		0.0314937		0.0843443		0.417956		0.0960657	33.2771		4
CC_OL_007_G23	-0.0578472		-0.116568		-0.350009	6.72025	-0.284242	19.9495	-0.368901	14.9433	0.407194	22.3838		4
CC_OL_007_H19	0.189996	12.0207	0.29551		0.0639708		0.0951515	42.6069	0.0523043		0.203162	37.1539	27.6504	4
CC_OL_007_M14	0.588195	1.81354	0.255209		0.15526	29.8948	0.140066	42.6069	-0.254592		-0.408273	6.39063	0.760804	4
CC_OL_007_P15	-0.026891		-0.0493574		-0.379207	23.4001	-0.182046	46.4198	-0.174979		0.0596001			4
CC_OL_007_P22	-0.0179965		0.119081		0.420035	13.5015	0.282933	17.4104	-0.0138195		-0.148435	37.1539	36.5087	4
CC_OL_008_B19	0.206911	22.2561	0.0740086		-0.0947774		0.270719	31.3506	-0.077314		-0.256289	25.9325	34.526	4
CC_OL_008_B22	0.232048	5.5422	0.314319		0.50127	9.15258	0.280958	17.4104	0.104128		-0.175242	44.0973	11.557	4
CC_OL_008_G21	-0.617586	1.85743	-0.721603	0	-0.390007	2.38721	-0.362827	2.02637	-0.582662	1.56915	-0.318092	6.39063	38.2545	4
CC_OL_008_I18	0.0941094	48.3647	0.0229144		0.00117563		0.11054	49.7484	0.154687	42.1044	-0.211925			4
CC_OL_008_L07	0.0448582		-0.138815		0.135233		-0.245924	24.6475	-0.00337854		-0.187882	25.9325	12.5609	4
CC_OL_009_C16	-0.208219		0.288093		-0.0441802		-0.130703		-0.261152	19.8042	-0.396219	15.0033	8.87849	4
CC_OL_009_F01	-0.0760012		-0.210742	28.7086	0.0680219		0.045592		0.115197		0.367466	18.8282	20.8934	4
CC_OL_009_G18	0.366404	8.31651	0.256416		-0.080685		0.0770956		-0.119845	46.4921	-0.0753955		7.26894	4
CC_OL_009_I07	0.199198	40.8778	-0.235254	40.2379	-0.082908		0.120191		0.0943498		0.284138	22.3838	48.4602	4
CC_OL_009_J02														4
CC_OL_009_K06	-0.0223001		0.257043		0.463254	14.9963	0.183009		-0.172068		0.0214446		41.6943	4
CC_OL_009_K07	0.0975908	22.2561	-0.0487179		-0.0230524		-0.0221177		-0.154771	37.6844	-0.0873775	37.1539		4
CC_OL_009_K10	0.222609	19.0265	0.0569237		0.202749		-0.0903241		0.215039	42.1044	0.277573	18.8282		4
CC_OL_009_L13	0.0993692	48.3647	0.156153		0.168497	46.9822	0.0786046	49.7484	-0.124195		-0.277336	22.3838	20.8934	4
CC_OL_009_N23	0.206395	15.9625	0.22738		0.252818	20.3752	0.0695045		0.235364		-0.335058	29.5603	10.2741	4
CC_OL_009_O14	-0.126976	44.9968	-0.149856	40.2379	-0.167255	46.9822	-0.223893	12.4531	-0.12603	37.6844	0.441329	8.05179	29.2653	4
CC_OL_009_O20	0.0991868	25.8116	-0.0621447		0.161346		0.0175927		-0.189825	34.569	0.272012	37.1539		4
CC_OL_010_E05	0.2542	3.78856	0.254455		0.0507206		-0.00491569		-0.274198	24.385	-0.766969	2.6814	0	4
CC_OL_010_G03	-0.0186553		-0.105517		-0.0316456		-0.0523778		-0.337244	24.385	-0.380484	15.0033	7.26894	4
CC_OL_010_G09	-0.10999		0.0151219		-0.091124		0.031269		0.0668908	37.6844	0.0891174		36.5087	4
CC_OL_010_G15	-0.0795231		0.0880179		0.0210566		-0.0660105		-0.533915	14.9433	-0.770915	2.6814	1.62381	4
CC_OL_010_K03	0.176266	40.8778	0.0619749		0.0389159		0.0454839		-0.114321	37.6844	-0.233639	22.3838	2.09221	4
CC_OL_010_N15	-0.111995		-0.0559806		-0.170226	33.8404	-0.266335	17.4104	-0.0154931		0.470436	8.05179	25.8284	4
CC_OL_011_A03	-0.195359	44.9968	0.113628		0.0299391		0.0442156		0.0965024		0.0859161			4
CC_OL_011_A17	0.0938504	44.9968	0.0296193		0.00598271		0.124028	42.6069	-0.310002	31.2984	0.124		40.0133	4
CC_OL_011_C05	0.0262105		0.211584		0.0635874		-0.367628		0.0569701		-0.223028	29.5603	12.5609	4
CC_OL_011_D15	-0.0336589		-0.113505		0.0755714		0.0666828	49.7484	-0.342279	28.6663	-0.437896	25.9325	8.87849	4
CC_OL_011_G05	0.280466	3.78856	0.0915607		0.10996		-0.00714554		-0.0458459		-0.108058	47.0896	17.0611	4
CC_OL_011_G19	0.0245239		0.117672		0.347323	20.3752	0.451383	28.1875	-0.228362	46.4921	-0.0914594		34.526	4
CC_OL_011_H09	0.0361516		0.253227		0.210287	29.8948	0.0222194		0.312639	42.1044	0.177588			4
CC_OL_011_I03	0.167573	33.7527	0.147955		-0.141317		-0.00446402		0.0240126		-0.117417		34.526	4
CC_OL_011_I04	-0.219378		-0.154478		-0.0187904		0.140047	46.4198	-0.147559	46.4921	-0.0490301			4
CC_OL_011_I06	0.261252	10.3357	0.0194036		-0.0950606		-0.121337	42.6069	0.198279	37.6844	0.428492	9.83445	36.5087	4
CC_OL_011_J20	0.259647	10.3357	0.247352		0.00996676		-0.102329		-0.0113244		-0.31761	40.5623	0.760804	4
CC_OL_011_K08	-0.19575	8.31651	-0.135812		0.0094585		-0.0117375		0.411364	28.6663	0.167987	22.3838	19.7483	4
CC_OL_011_K10	-0.369346	7.17452	0.016184		-0.0423673		-0.077461		-0.0761524		-0.0546894	47.0896		4
CC_OL_011_K15	-0.177083	29.718	-0.0636313		0.257303	20.3752	0.133425	42.6069	0.160146		-0.360167	33.2771		4
CC_OL_011_K20	0.0885246	22.2561	-0.039912		0.106134	46.9822	-0.136208	49.7484	-0.114866		-0.0786688	49.9057	48.4602	4
CC_OL_011_M09	-0.738796	4.63086	-1.54779	3.77277	-0.971103	7.65896	-0.658405	10.4046	0.516763	42.1044	0.588665	15.0033	3.38315	4
CC_OL_011_P05	-0.0249942		-0.101395		-0.0190745		0.0821838		0.184654	37.6844	0.527852	9.83445	17.0611	4
CC_OL_012_A02	-0.0951201		0.0977378		-0.0263217		0.306418	42.6069	0.207928	42.1044	0.0231811			4
CC_OL_012_E14	-0.540302	0	-0.279887	21.9863	-0.491179	4.42277	-0.450999	2.49772	-0.416288	28.6663	0.231148	15.0033	17.0611	4
CC_OL_012_E15	0.215222	22.2561	0.103387		-0.0383848		-0.0598753	49.7484	-0.00563726		-0.488771	1.19021	6.34878	4
CC_OL_012_F05	0.118197	29.718	-0.00813405		0.00306759		-0.159019		-0.315785	14.9433	-0.0573318	40.5623	8.07623	4
CC_OL_012_H20	0.107711	25.8116	0.0492137		-0.124216		-0.0561053		0.174792		0.254902	12.1023		4
CC_OL_013_B08	0.0819491	37.5172	0.160852		0.0884705		0.0119957		0.195764	46.4921	-0.124615	33.2771	27.6504	4
CC_OL_013_B17	-0.0118577		-0.0316075		-0.554138	11.0134	-0.41166	3.62885	-0.172043	46.4921	-0.0677521			4
CC_OL_013_E05	-0.172		0.029678		0.0360775		-0.320485	34.9677	0.0362914		0.332733	22.3838	38.2545	4
CC_OL_013_E23	0.28315	6.38553	0.184259		0.0105713		0.0310425		-0.127882		-0.648672	4.14154	0.760804	4
CC_OL_013_G02	0.192249	15.9625	0.185529		0.0472816		0.0535548		-0.0164014		0.237614	12.1023		4
CC_OL_013_I19	0.163547	15.9625	-0.129487		-0.0661099		-0.193502		0.294808		-0.309954	18.8282	27.6504	4
CC_OL_013_J20	-0.0916895		-0.15243		-0.116398		-0.0497366		0.236294	42.1044	0.024097		38.2545	4
CC_OL_013_M17	0.154824	15.9625	0.0631041		-0.0436084		0.0154219		-0.0985665		0.335152	18.8282		4
CC_OL_013_N04	-0.00797975		-0.110741		-0.196932		-0.172621	14.0943	-0.211188	31.2984	0.499868	12.1023	31.0409	4
CC_OL_013_O18	-0.496394	1.85743	-0.231678		-0.163711		-0.163711	26.4536	0.314695	34.569	0.440801	12.1023	2.01659	4
CC_OL_013_P09	0.109312	22.2561	0.0287145		0.00909556		-0.0681685		-0.145904		0.0711787		40.0133	4
CC_OL_013_P16	-0.265202	25.8116	-0.215543	40.2379	-0.308753	37.2031	-0.5249	5.01725	-0.500927	21.4061	0.0194261	44.0973		4
CC_OL_014_F22	0.11366	25.8116	0.074339		0.129363	42.2193	0.126106	42.6069	-0.111259		-0.352664	18.8282	19.7483	4
CC_OL_014_J17	-0.299012	12.0207	-0.0462618		-0.286053		-0.312333	26.4536	-0.374183	6.05829	-0.43368	12.1023	17.0611	4
CC_OL_014_P02	0.309377	7.17452	0.217135		0.494339	23.4001	0.274169	28.1875	-0.0965631		-0.278536		14.3906	4
CC_OL_015_B05	0.0448732		0.146895		0.186568	33.8404	0.170579	42.6069	-0.428372	17.9191	-0.888559	0	1.65311	4
CC_OL_015_C10	-0.00977145		0.049929		0.153328		0.140598	34.9677	-0.0516165		-0.129224	40.5623	25.8284	4
CC_OL_015_E08	-0.327235	48.3647	0.444088		0.322158	18.2822	0.312184	28.1875	0.0392454		0.231019	9.83445	48.4602	4
CC_OL_015_E10	-0.0050747	48.3647	0.176718		0.260444	46.9822	-0.0387206		0.0902736		0.17461	22.3838		4
CC_OL_015_G01	-0.19256	33.7527	-0.3303	5.70962	-0.0208274		0.00781124		0.113212		-0.557439	12.1023		4
CC_OL_015_G13	-0.198218		-0.169695		0.148791	42.2193	0.15918	31.3506	-0.220649	46.4921	-0.734666	3.22942	20.8934	4
CC_OL_015_J12	0.00717891		-0.140839		0.0825499		0.0825499	49.7484	0.151388		-0.357415	15.0033		4
CC_OL_015_L08	-0.130506		-0.0726102		-0.212951		-0.156032	46.4198	-0.314114	14.9433	-0.219353	22.3838	12.5609	4
CC_OL_015_L19	0.11989	19.0265	0.0502225		0.230599		-0.0944792		0.0416253		0.0598303		20.8934	4
CC_OL_015_O18	0.169513	22.2561	0.139331		0.0264208		-0.0134507		0.153276		-0.084136	49.9057		4
CC_OL_016_D13	0.107257	33.7527	-0.0893418		0.109074		-0.0548857		-0.118533	46.4921	-1.08022	3.22942	2.84897	4
CC_OL_016_D24	0.0887547	29.718	0.24625		0.252517		0.0832657		-0.0520841		-0.40236	22.3838	3.97255	4
CC_OL_016_E10	0.177007	12.0207	0.288023		0.146992	42.2193	0.333279	31.3506	-0.327063	21.4061	-0.575906	3.22942	0.760804	4
CC_OL_016_E21	-0.181399		-0.0967312		-0.0338311		0.00135756		-0.153453	46.4921	-0.236994	33.2771	38.2545	4
CC_OL_016_J13	0.0954522	48.3647	-0.322337	17.2634	-0.163611		-0.0227872		-0.276763	14.9433	0.347231	12.1023	31.0409	4
CC_OL_016_N06	-0.121332		0.0430555		-0.129606		-0.142959		-0.0918621		-0.00172492			4
CC_OL_016_O18	0.127947	25.8116			0.00775515		0.114551		-0.166774		0.167764	15.0033		4
CC_OL_016_P08	0.579405	8.31651	0.125524		-0.173612		-0.0853724		0.092821		0.463492	15.0033	41.6943	4
CC_OL_017_A08	0.0224123	48.3647	0.156112		0.190008	46.9822	0.0294738		0.211473	42.1044	0.0505676	40.5623		4
CC_OL_017_D15	0.388621	3.78856	0.22308		0.11277		0.0148913		-0.0608805		-0.0340577		10.2741	4
CC_OL_017_F03	0.0760822	25.8116	-0.0897617		0.174889	42.2193	0.0193356		-0.0735927		-0.00426253		31.0409	4
CC_OL_017_L17	-0.032373		-0.0274132		0.142602		0.0399972		0.119268	46.4921	-0.197384	15.0033	45.0807	4
CC_OL_018_E09	-0.0220991		0.00803937		0.150182	26.8456	0.352884	17.4104	0.227882		-0.65124	18.8282	27.6504	4
CC_OL_018_E12	0.411374	2.32496	-0.0193747		0.223334	37.2031	0.0105005		-0.142149		-0.143103		10.2741	4
CC_OL_018_H05	0.0563497	37.5172	0.0973711		0.20273	20.3752	0.0772247	49.7484	0.248711		-0.160952		41.6943	4
CC_OL_018_H10	-0.046741		-0.00466518		0.321687	20.3752	0.0961823	49.7484	-0.36584	21.4061	-0.939925	0.835227	3.38315	4
CC_OL_018_H21	0.102063	25.8116	0.274427		0.221077	26.8456	0.222303	46.4198	-0.00719234		-0.00248715		24.012	4
CC_OL_018_P12	-0.159632	22.2561	-0.115569		0.219547	23.4001	0.251625	26.4536	-0.399831	5.31916	-0.271655	40.5623	32.8143	4
CC_OL_019_A01	0.566228	2.2718	0.339531		0.206714	46.9822	0.153619	42.6069	-0.157857		-0.0927741	44.0973	0.760804	4
CC_OL_019_A03	0.013082		-0.0974975		-0.181771		-0.0514555		-0.161592	42.1044	0.0537938	47.0896		4
CC_OL_019_A15	0.366063	10.3357	0.080459		-0.218155		-0.0486063		-0.0652851		-0.293647	18.8282	4.35452	4
CC_OL_019_B08	-0.114869		-0.0477403		0.100176		0.10822		-0.0240167		-0.357174	33.2771	48.4602	4
CC_OL_019_C15	-0.0885544		0.0346701		-0.0704562		0.141981	46.4198	-0.63156	5.31916	-0.307037		49.9559	4
CC_OL_019_E15	0.0877571	25.8116	0.0966606		-0.063342		-0.0791797		-0.251801	37.6844	-0.109828		14.3906	4
CC_OL_019_E18	0.102178	25.8116	0.211502		-0.0110441		0.00251508		-0.0629662		-0.50346	12.1023	7.26894	4
CC_OL_019_H21	0.366463	6.38553	0.254481		0.0981232	46.9822	-0.0300782		0.134502		-0.198925		17.0611	4
CC_OL_019_J18	-0.0622369		0.112859		0.216888		-0.234857	34.9677	0.0652667		0.335442	6.39063		4
CC_OL_019_L10	-0.145135	37.5172	0.1177		0.0342142		0.00663801		-0.130675		-0.0169873			4
CC_OL_019_L24	0.148308		0.0978687		-0.044525		0.196342	46.4198	-0.00253538		0.181115	29.5603		4
CC_OL_019_O08	-0.0714853		0.2784		0.0912301		0.0775695		0.240336	42.1044	0.30275	12.1023	27.6504	4
CC_OL_020_A10	0.0359299		0.00697321		0.0448803		-0.228762		0.181882		0.0596387	33.2771		4
CC_OL_020_C06	-0.0437431		-0.0654714		0.0214119		-0.131126		0.0723308		0.207291	25.9325	40.0133	4
CC_OL_020_C10	-0.0104515		-0.137724		0.0233509		-0.154338		0.113528		-0.384091	3.31894	40.0133	4
CC_OL_020_D14	0.221212	6.38553	0.12636		0.0365482		0.128811		0.1987	37.6844	0.0986239	47.0896	48.4602	4
CC_OL_020_E18	0.252377	2.32496	0.108003		0.0223037		0.156024	34.9677	-0.254607	34.569	0.174519	29.5603	27.6504	4
CC_OL_020_F07	0.0378847		0.104981		0.049511		-0.0205211		0.0220085		-0.15736	49.9057	18.3434	4
CC_OL_020_F10	0.162193	40.8778	0.0596185		0.242672	42.2193	0.125219	49.7484	0.105356		-0.678911	0.541822	7.26894	4
CC_OL_020_I06	-0.0619193		-0.0021452		0.351129	37.2031	-0.143253		-0.0791965		-0.0291558			4
CC_OL_020_M14	0.0346867	44.9968	-0.138132		-0.315859	14.9963	-0.0633821		-0.141908	46.4921	-0.474086	4.14154	15.7073	4
CC_OL_020_M15	-0.0314594		0.120408		0.340416	37.2031	0.317129	19.9495	-0.457974		-0.740496	18.8282	7.26894	4
CC_OL_020_P17	0.0581739	48.3647	-0.00602384		0.168594	37.2031	0.0468434		0.0664021		-0.0730386			4
CC_OL_020_P18	-0.020793		0.0722302		0.266516	23.4001	0.14584	38.5493	0.0709178		-0.115854		45.0807	4
CC_OL_020_P23	0.0522212	44.9968	0.196681		0.156939		0.239641	17.4104	0.0324566		-0.2569	9.83445	22.1877	4
CC_OL_021_B04	0.204194	19.0265	-0.184946	49.244	0.0389085		0.0957185		0.135425		-0.550658	15.0033	8.07623	4
CC_OL_021_D24	-0.26487	6.38553	-0.129219		0.275824	33.8404	0.189721	42.6069	-0.0172322		0.00427208		34.526	4
CC_OL_021_H21	-0.0624409		0.0419139		0.183006	42.2193	-0.0567346		-0.356973	31.2984	-0.653815	3.22942	5.93671	4
CC_OL_021_I23	0.0273206	48.3647	0.165745		0.144994		-0.0377609		-0.370546	34.569	-0.220302	22.3838	3.97255	4
CC_OL_021_N24	-0.135529	48.3647	0.0851056		0.080827		0.0703611		-0.163412	46.4921	-0.643685	12.1023	10.2741	4
CC_OL_021_O16	0.0766386	48.3647	0.167879		0.585803	11.0134	0.165904		-0.0854784		0.0908773	33.2771		4
CC_OL_021_P06	-0.497115	4.63086	-0.785265	2.29555	-0.657261	5.3725	-0.497728	28.1875	-0.778267	7.15844	-0.223085	49.9057	32.8143	4
CC_OL_022_C03	0.126058	40.8778	-0.103515	49.244	0.249268	37.2031	0.186453	42.6069	-0.219682	37.6844			45.0807	4
CC_OL_022_C14	-0.275586	44.9968	0.204806		0.339142	20.3752	0.253929	15.5702	0.0223026		-0.0803386	44.0973		4
CC_OL_022_I24	-0.0311463		-0.142454	45.1357	-0.0898328		-0.134464	34.9677	-0.367056	11.3424	-0.254647	25.9325	15.7073	4
CC_OL_022_J02	-0.256893		0.04924		-0.393943	4.28755	0.0595891		-0.133032	37.6844	-0.0526155	37.1539		4
CC_OL_022_K14	0.0863219	22.2561	0.0221205		0.102203		0.0387733		-0.193922	28.6663	-0.115575	44.0973	8.87849	4
CC_OL_022_P10	0.0502136	44.9968	0.0330843		0.0908771		-0.041711		0.0547948		0.117127	33.2771		4
CC_OL_022_P11	-0.114081	29.718	-0.252023	49.244	0.136641	42.2193	0.0868775	49.7484	-0.0393341		-0.809142	18.8282		4
CC_OL_023_A17	1.12359	1.81354	0.13361		-0.0423511		-0.100027		0.14886		-0.0216494		10.2741	4
CC_OL_023_G13	-0.0551354		-0.0492522		0.308232		0.313711	38.5493	0.28544	34.569	-0.117068			4
CC_OL_023_H06	0.069267	37.5172	0.0468468		-0.281208	42.2193	-0.286039	17.4104	-0.0820618		-0.108044	49.9057		4
CC_OL_023_H22	-0.0952671		-0.211591		0.0289882		0.0230108		0.0256785		-0.0155705			4
CC_OL_023_L06	0.160139	15.9625	0.109173		0.216445	46.9822	-0.0711031		-0.0665048		-0.191207	29.5603	2.84897	4
CC_OL_023_L08	0.237365	15.9625	0.0121906		0.00483291		0.160384	42.6069	-0.0767622	46.4921	-0.567142	5.33638	5.93671	4
CC_OL_023_L18	0.122143	29.718	0.0401405		0.131661	42.2193	0.074106	49.7484	0.00959751		0.0845966		36.5087	4
CC_OL_023_M24	0.306382	7.17452	0.177038		0.195529		0.291833	6.78638	0.648167	24.385	0.662757	5.33638	29.2653	4
CC_OL_023_O17	0.226457	22.2561			-0.102124		0.0871164		0.144459		-0.204973		43.4785	4
CC_OL_024_F16	-0.0573606		-0.073239		-0.125846		-0.230372		-0.241226	34.569	0.0768401		49.9559	4
CC_OL_024_H07	0.176051	13.6381	-0.0912724		0.180913		0.0357596		-0.037907		0.277794	15.0033		4
CC_OL_024_H14	0.0682141		0.443753	34.5567	0.1548	42.2193	-0.000539609		0.0572002	46.4921	0.0755324		27.6504	4
CC_OL_024_J23	-0.0709699		0.137813		0.338484	23.4001	0.0648555		0.325088	28.6663	-0.181652			4
CC_OL_025_K11	0.203557	19.0265	0.038201		0.072037		-0.028121		-0.105795		0.286994	8.05179		4
CC_OL_025_K21	0.127295	25.8116	-0.0112376		-0.197293	14.9963	-0.228771	22.1072	-0.232748	42.1044	0.106357	22.3838		4
CC_OL_025_K22	0.347649	6.38553	0.322604		0.180605	33.8404	0.231155	42.6069	0.235782	37.6844	0.100151	18.8282	41.6943	4
CC_OL_026_A20	0.148697	25.8116	0.0924125		0.0871607		0.117295	46.4198	-0.22989	26.3119	-0.217591	29.5603	8.07623	4
CC_OL_026_D16	-0.0266578		0.00259688		-0.268477	8.15431	-0.235595	12.4531	-0.0309283		0.478392	15.0033	32.8143	4
CC_OL_026_H18	0.234699	19.0265	-0.235647	40.2379	-0.299274		-0.158946		-0.431225	26.3119	-0.0670508		24.012	4
CC_OL_026_I14	0.496059	2.91035			0.269954	20.3752	0.151704							4
CC_OL_026_O05	-1.18606	0	-0.545016	2.29555	-1.04041	0	-0.8867	0	-0.981347	0	-0.582584	4.14154		4
CC_OL_026_O16	0.116314	19.0265	0.317541		0.313881	23.4001	0.189961	26.4536	0.0302063		-0.147687	40.5623	17.0611	4
CC_OL_027_D21	0.022072	37.5172	0.35575		0.122706		-0.185964		-0.129485		0.07095		25.8284	4
CC_OL_027_H05	0.132203	10.3357	0.274546		0.0602536		0.0832011		-0.170302	46.4921	0.0573888		15.7073	4
CC_OL_027_I01	0.56687	7.17452	0.304163		0.273305	20.3752	0.667161	1.69212	-0.101501		-0.652721	2.33695	5.93671	4
CC_OL_027_I02	0.287866	13.6381	-0.100494		-0.0755524		0.0827002		-0.618173	34.569	-0.50041	40.5623	22.1877	4
CC_OL_027_L22	-0.121886		0.00908228		-0.0183531		0.000769485		0.119134	46.4921	0.0889302	40.5623	32.8143	4
CC_OL_027_O08	-0.237891	37.5172	0.0549317		0.126313		0.1394		-0.0234556		0.384847	9.83445	22.1877	4
CC_OL_028_D07	0.026302		-0.105091		-0.231054	29.8948	-0.27358	14.0943	-0.29568	26.3119	-0.0315177		49.9559	4
CC_OL_028_G21	0.0156311		-0.0365315		0.30729	42.2193	0.104628		-0.110444		-0.297361	22.3838	12.5609	4
CC_OL_028_I02	0.316306	15.9625	0.171562		-0.308736	46.9822	-0.241513	14.0943	-0.197839		0.0171628		24.012	4
CC_OL_028_I17	-0.0226214		-0.184672	37.0587	-0.0619863		-0.0775498		0.145651		-0.137084			4
CC_OL_029_D23	0.0260039		0.0139065		0.108986		-0.142727		0.360879	34.569	0.249579		49.9559	4
CC_OL_029_E23	0.0747339		0.0553125		0.157786	46.9822	0.0222192		-0.00835374		-0.0263831		46.6954	4
CC_OL_029_G14	-0.160728	22.2561	-0.104239		-0.0498802		0.0432392		0.274339	37.6844	0.201858		34.526	4
CC_OL_030_A05	0.530077	4.63086	0.159009		0.121378		0.053844		-0.570765		-0.206493	6.39063	3.97255	4
CC_OL_030_E01	0.165909	33.7527	-0.131183	45.1357	-0.282744		0.0952065		-0.116078		-0.06899			4
CC_OL_030_E20	0.248387	8.31651	-0.119974		-0.0268765		0.0661271		0.0552007		0.401443	12.1023		4
CC_OL_030_F06	0.179055	19.0265	0.158781		-0.014608		-0.0299322		-0.0685179		-0.261931		14.3906	4
CC_OL_030_G09	0.127415	37.5172	-0.0668486		0.0619182		-0.0111495		-0.164735		0.0651069		29.2653	4
CC_OL_030_I24	0.159015	25.8116	-0.0696004		-0.00863784		-0.0354327		-0.133816	37.6844	-0.21745		17.0611	4
CC_OL_030_J18	0.0211109		0.0277879		0.12591	29.8948	0.0642232		0.430096	34.569	-0.0946301	40.5623		4
CC_OL_030_K15	-0.00810165		-0.0934792		0.0394353		0.0487086		-0.244902	42.1044	-0.0753261		38.2545	4
CC_OL_030_K16	-0.0251629		-0.10018		-0.186007	37.2031	-0.290546	17.4104	-0.220214	31.2984	-0.0475741	47.0896		4
CC_OL_030_L05	0.0657751	29.718	0.0383077		0.0832311	46.9822	-0.0254676		-0.0503784		-0.205579		29.2653	4
CC_OL_030_L16	-0.0459286		0.038625		0.0537576		-0.00689444		0.192461	42.1044	-0.131919	47.0896		4
CC_OL_030_N20	0.0230428	48.3647	-0.152389	49.244	0.123932		-0.0254417		0.319998		0.201895	18.8282	32.8143	4
CC_OL_031_D02	0.0635009		-0.0461496		-0.0975784		-0.191989	38.5493	-0.131002		-0.188154	29.5603	38.2545	4
CC_OL_031_D09	0.272471	4.63086	0.0151081		0.0629164	46.9822	0.137119	42.6069	-0.255286	34.569	-0.641829	2.6814	1.62381	4
CC_OL_031_D11	0.196959	10.3357	0.20916		0.237026		0.0270669		0.0833458		0.174565	12.1023		4
CC_OL_031_D14	0.178749	13.6381	-0.140238		0.0494623		0.135951	38.5493	-0.318873	24.385	-0.516762	25.9325	12.5609	4
CC_OL_031_M04	-0.102431		0.18717		-0.0357098		-0.419311	31.3506	0.00879481		0.269565	15.0033		4
CC_OL_031_O14	0.195764	12.0207	-0.00725927		0.0308227		0.141596		-0.598082	28.6663	-0.63952	2.33695	2.56407	4
CC_OL_031_O21	0.282636	13.6381	-0.0699709		0.189985	33.8404	0.194946	34.9677	0.0780102		-0.103213		41.6943	4
CC_OL_032_B01	-0.165312		-0.150433		0.188277		-0.00562691		0.0920902		-0.220942	25.9325		4
CC_OL_032_G13	0.0749282		0.0130398		0.119013		-0.0339744		0.355818	46.4921	-0.275143	15.0033	48.4602	4
CC_OL_032_I21	-0.142316	40.8778	-0.0621127		-0.542008	2.38721	-0.319028	15.5702	-0.195239	28.6663	0.410245	9.83445	29.2653	4
CC_OL_032_J11	0.236391	15.9625	0.133243		0.0127373		0.191432	49.7484	-0.0722044		0.0532272		11.557	4
CC_OL_032_N09	0.0277984		-0.0354062		-0.445455	0	-0.332682	6.78638	-0.50216	6.33755	0.267689	18.8282		4
CC_OL_032_O13	0.0287762		-0.0014533		0.0126224		-0.0113296		-0.063275	37.6844	0.201158		49.9559	4
CC_OL_033_B11	-0.174956		0.00804961		-0.0347512		0.050041		0.166391	34.569	-0.0317689		48.4602	4
CC_OL_033_B22	0.170933	15.9625	-0.034895		0.0425164		0.240876	46.4198	0.185584	37.6844	0.642053	15.0033	38.2545	4
CC_OL_033_F13	-0.014488		-0.284587	45.1357	-0.634432	2.38721	-0.340975	28.1875	-0.332084	14.9433	0.47347	15.0033	31.0409	4
CC_OL_033_J18	-0.0521492		-0.0528264		-0.453104	5.3725	-0.374775	3.9376	-0.732088	0	0.0736402		41.6943	4
CC_OL_033_N17	0.122928	29.718	0.147712		-0.0993345		-0.214444	49.7484	-0.159789		0.431473	15.0033		4
CC_OL_033_P19	0.296565	4.63086	0.197544		0.23516	46.9822	0.156407	46.4198	0.0863607		-0.0362399		17.0611	4
CC_OL_034_B13	0.150692	29.718	-0.0538893		-0.0298327		-0.0584842		-0.0289365		0.200911	37.1539		4
CC_OL_034_E05	-0.035869		0.0945485		0.0128696		-0.10431		-0.0390719		0.223608	37.1539		4
CC_OL_034_G03	0.0698938		-0.0843224		-0.090392		0.0086449		-0.159318	31.2984	0.0870422			4
CC_OL_034_G18	0.0692447	22.2561	0.208137		0.0173445		-0.0194289		0.192058	37.6844	0.193247			4
CC_OL_034_G24	0.182181	22.2561	0.0405453		-8.46431e-05		0.134077	42.6069	0.0560798		-0.240592	33.2771	29.2653	4
CC_OL_034_H08	0.0386071		-0.0235384		0.187378		-0.00801602		0.0652667		-0.258499	15.0033	31.0409	4
CC_OL_034_H11	-0.181813		-0.351476	34.5567	0.0326009		0.19872	49.7484	-0.433085	24.385	-0.415307			4
CC_OL_034_H15	0.239377	19.0265	0.0861641		0.225368		0.159889		-0.185716	46.4921	-0.206382	29.5603	5.07451	4
CC_OL_034_J01	0.231779	44.9968	-0.00128475		-0.259911		0.011112		-0.459334	9.79633	-0.375758	22.3838	15.7073	4
CC_OL_035_F15	0.0483605	44.9968	-0.0486153		-0.0448202		0.0183989		-0.286097	24.385	-0.161897	40.5623	20.8934	4
CC_OL_001_A11	-0.00648116		0.154572		-0.22052	37.2031	-0.140732	46.4198	-0.0945281		0.101606	44.0973		5
CC_OL_001_I03	-0.116206		0.00737271		0.302356		0.0868806		-0.271682	31.2984	-0.789612	5.33638	10.2741	5
CC_OL_001_J10	0.0327237	44.9968	0.0612762		0.116081		0.0439786		-0.153275	42.1044	-0.256635	12.1023	8.07623	5
CC_OL_002_A09	-0.0596189		-0.0132477		0.0744631		0.00307254		0.022341		0.377432	18.8282	27.6504	5
CC_OL_002_C04	-0.401592	12.0207	0.170323		0.4031	26.8456	0.112398		-0.365265	37.6844	-0.0336502			5
CC_OL_002_D19	-0.123116		-0.0513137		0.0962704		0.022815		0.0240643		0.0743928	40.5623	40.0133	5
CC_OL_002_D22	0.199843	15.9625	0.189455		0.340724	26.8456	0.0956353		-0.0813129		-0.132068		18.3434	5
CC_OL_002_E14	0.294611	12.0207	0.136024		-0.0803221		-0.0536627		0.0024899		0.218128	12.1023		5
CC_OL_002_F05	-2.5895	2.32496	-0.064478		0.236057	33.8404	0.223175		0.0434275		-0.212036	18.8282	24.012	5
CC_OL_002_F16	-0.131017		-0.135894		0.150092		0.00686683		-0.00966958		-0.00180362			5
CC_OL_002_F18	0.369416	3.78856	0.133933		-0.0276706		0.107507		0.360641		0.0902703		31.0409	5
CC_OL_002_F24	-0.0569058		0.244683		0.246698	33.8404	0.128914	49.7484	-0.0426969		-0.305686	8.05179	12.5609	5
CC_OL_002_I01	0.0189795		0.0187868		0.131382		0.289762	22.1072	-0.0608284		0.147345	25.9325		5
CC_OL_003_E02	-0.447899		-0.0101075		0.00242275		0.0888006	46.4198	-0.629651	0	-0.235121	15.0033	24.012	5
CC_OL_003_F20	0.327429	15.9625	-0.2209		-0.158047		-0.150893	31.3506	0.0140352		0.145376	33.2771		5
CC_OL_003_I09	-0.169181	22.2561	0.109321		0.0626289		0.0898696		-0.0651038		0.233253	33.2771	36.5087	5
CC_OL_003_N23	-0.0106958		-0.0415495		-0.353967	5.3725	-0.262658	3.62885	-0.188899	31.2984	0.455023	9.83445	43.4785	5
CC_OL_004_D22	-1.74535	2.91035	-0.0997681		0.0402312		-0.181184	49.7484	-0.412778	31.2984	0.0391942		29.2653	5
CC_OL_004_E02	0.224372	25.8116	0.0766099		0.201247		0.282696	26.4536	0.211831		-0.184523		24.012	5
CC_OL_004_E16	-0.670906	13.6381	0.0263323		-0.102773		0.149413		-0.0403844		-0.204156	18.8282	41.6943	5
CC_OL_004_H17	-0.209991		0.122151		0.151243	29.8948	0.127171		0.194201		0.0756975			5
CC_OL_004_I02	-0.538854	25.8116	-0.205769		0.10295		0.054294		-0.0357802		-0.191812			5
CC_OL_004_L15	-0.483172	48.3647	-0.132344		0.12029		-0.0767295		0.184233	42.1044	-0.200417	18.8282	48.4602	5
CC_OL_005_A03	-0.72173	4.63086	-0.389345		0.237643	23.4001	0.0690421		0.0120023		-0.474853	4.14154	36.5087	5
CC_OL_005_A21	-0.0668903		0.14069		0.212967	26.8456	0.181586	34.9677	0.0116567		0.177965	40.5623		5
CC_OL_005_O04	-2.31162	2.10777	-0.568953	49.244	0.3791	26.8456	0.188969		-0.254507		0.27348	15.0033	14.3906	5
CC_OL_005_O07	-0.115849		-0.114302		-0.465804	7.65896	-0.441995	12.4531	-0.667012	8.3482	0.0984519	47.0896		5
CC_OL_006_B14	-0.0218531		-0.282825		0.0248671		0.277567		-0.302043		0.0945675	37.1539	43.4785	5
CC_OL_006_J22	0.477687	8.31651	-0.345735	26.5964	-0.114211		-0.0108396		-0.180761	42.1044	-0.0831291			5
CC_OL_006_K23	-0.0402644		-0.105914		-0.034851		-0.00912911		-0.0111987		-0.129968	29.5603		5
CC_OL_006_P17	-0.293129	2.32496	-0.175044		0.128407		-0.0412675		0.217473		0.0166001		29.2653	5
CC_OL_006_P18	-0.00262463	33.7527	-0.241168		0.117184		0.145602	46.4198	-0.255812	34.569	-0.200048	29.5603	31.0409	5
CC_OL_007_D11	0.131104	40.8778	0.0105727		0.185619	46.9822	-0.116047		-0.156261	34.569	-0.0190291		20.8934	5
CC_OL_007_J02	-0.237439		-0.0382727		-0.0486819		0.237154	26.4536	0.6201	28.6663	0.584481	6.39063	19.7483	5
CC_OL_007_J10	-0.134499		0.175786		0.0778257		-0.041503		0.321291	42.1044	0.257338	15.0033	34.526	5
CC_OL_007_P05	-0.692309	1.402	-0.477595	17.2634	-1.02265	0	-1.09294	0	-0.671127	14.9433	-0.189608	29.5603	31.0409	5
CC_OL_008_H06	0.199692	19.0265	-0.129265		-0.0387747		0.0763537		0.262756	42.1044	-0.145452	37.1539		5
CC_OL_009_H10	0.168958	19.0265	0.0495073		0.505935	5.93425	0.187819	38.5493	0.169399		-0.142781		31.0409	5
CC_OL_010_A11	0.225684	4.63086	-0.0296516		-0.0397806		0.12275	42.6069	0.567399	42.1044	0.209487	15.0033	49.9559	5
CC_OL_010_A13	-1.43649	4.63086	0.000364201		0.313223		-0.00886129		-0.168608		-0.00331616		31.0409	5
CC_OL_010_C12	0.074065		-0.0731961		0.28113	20.3752	0.148085	46.4198	0.196853	37.6844	0.144055	47.0896	46.6954	5
CC_OL_010_I13	-0.190018		-0.0713019	45.1357	0.130556		0.0567303		0.137784		-0.00569967			5
CC_OL_010_N03	-0.0138008		0.0365101		-0.00294514		-0.188164	34.9677	-0.0844077		-0.121619	49.9057	43.4785	5
CC_OL_010_O04	0.198759	15.9625	0.253462		0.499614	7.65896	0.244705	42.6069	0.20085	37.6844	-0.969747	3.31894	12.5609	5
CC_OL_011_D13	-0.00244683		0.0357754		-0.092872		-0.0740571		-0.159106		0.222032	25.9325	36.5087	5
CC_OL_011_F23	0.139937	33.7527	-0.10193		0.0429173		0.130866		-0.238513	42.1044	-0.362692	6.39063	4.35452	5
CC_OL_011_N06	0.206657	22.2561	0.27658		0.114054		0.0846115		-0.255552	34.569	0.0655962	44.0973	25.8284	5
CC_OL_012_C03	-0.593089	2.10777	-0.538761	11.3554	-0.457455	6.03974	-0.672381	0.631292	-0.342967	28.6663	0.113612	44.0973	24.012	5
CC_OL_012_E11	0.155114	13.6381	0.17799		0.103506		-0.0223364		-0.447393	19.8042	-0.54534	3.31894	0.760804	5
CC_OL_012_H15	-0.0235209	48.3647	0.0228227		-0.00646543		0.0831541		-0.27219		-0.158531		36.5087	5
CC_OL_012_O13	0.0238652		-0.233036	34.5567	0.0717957		0.0518405		-0.0919311		0.0539696			5
CC_OL_012_P14	0.10099		-0.118027		0.178357		0.0579177		0.000650801	46.4921	-1.12573	22.3838	2.09221	5
CC_OL_013_D17	0.0519056		-0.00199775		-0.260472	29.8948	-0.223997	15.5702	-0.0580381		0.172298	29.5603		5
CC_OL_013_G13	0.192214	19.0265	0.106893		-0.00150842		0.101892	46.4198	0.190597		0.176137			5
CC_OL_013_G19	0.0132961		0.108929		0.221414	33.8404	0.0409593		-0.0058262		0.17263	29.5603		5
CC_OL_013_G22	0.213883	25.8116	0.146082		0.15021	33.8404	0.141837	34.9677	-0.179609	42.1044	-0.447785	3.31894	0.782135	5
CC_OL_013_H06	-0.268003	22.2561	0.051823		0.416773	13.5015	0.172241	28.1875	-0.251721	24.385	-0.532052	6.39063	20.8934	5
CC_OL_014_N23	-0.0813483		0.180605		0.243375	26.8456	-0.152202		0.169234		-0.0805633			5
CC_OL_015_B04	-0.979669	0	-0.585306	12.0608	-1.05032	0	-1.0414	0	-1.08252	1.23474	-0.296242	47.0896	43.4785	5
CC_OL_015_J13	0.174659	29.718	-0.0383695		0.212312	46.9822	-0.00931149		-0.251002	26.3119	-0.14773		20.8934	5
CC_OL_015_J15	-0.0609546		-0.120063		-0.179519	33.8404	-0.474417	6.78638	0.0229452		0.432953	5.33638	36.5087	5
CC_OL_015_L12	-0.0643601		0.336454		0.252034	42.2193	-0.00651687		0.200426	37.6844	-0.0482976			5
CC_OL_015_P12	0.102484		-0.0148737		-0.026554		0.0777297		0.0320922		-0.0397254		40.0133	5
CC_OL_015_P19	-0.18471	10.3357	-0.0384329		-0.45845	33.8404	-0.138872		-0.0102026		0.403285	15.0033	24.012	5
CC_OL_016_A05	-0.733477	10.3357	-0.232309		0.00853458		-0.0406439		-0.245859	34.569	0.239756		24.012	5
CC_OL_016_C16	-0.272566		0.0172674		0.218704	37.2031	0.00704462		-0.355897	37.6844	-0.0433232	40.5623		5
CC_OL_016_D03	-0.0673413		-0.195154		0.00556726		-0.16307	42.6069	-0.453076	28.6663	-0.130759		49.9559	5
CC_OL_016_G05	0.140015	25.8116	0.31924		0.225038	46.9822	0.0617813		-0.00183851		-0.524937	4.14154	3.97255	5
CC_OL_016_N16	-0.174368		-0.142767		0.0972576	46.9822	0.0258261		0.0706989		0.365009	44.0973	34.526	5
CC_OL_017_A05	-0.153628		0.123808		0.166276	29.8948	0.301633	15.5702	-0.212285		-0.107379			5
CC_OL_017_B13	0.157197	25.8116	0.0417715		-0.0945444		0.0379371		-0.161418	34.569	0.84947	8.05179	36.5087	5
CC_OL_017_P06	0.219827	29.718	0.232563		0.227405	46.9822	0.147233	49.7484	-0.0391826		-0.480145	9.83445	5.07451	5
CC_OL_018_C11	-0.0874972	40.8778	-0.278117	40.2379	0.0824522		0.112191	49.7484	0.193662	42.1044	0.202838	47.0896	19.7483	5
CC_OL_018_G03	-0.638705	0	-0.301295	17.2634	-0.574368	0	-0.684985	2.02637	-0.857474	4.43055	-0.267432	44.0973		5
CC_OL_018_N09	0.00493792		-0.0758633		0.139785	42.2193	-0.0036367		-0.16707		0.125464	37.1539		5
CC_OL_018_O04	-0.502348	6.38553	-0.378441		0.573512	5.93425	0.338324	15.5702	0.193632		-0.0870783		38.2545	5
CC_OL_018_O21	-0.113629		-0.0161148		0.193964	37.2031	0.115205	46.4198	-0.0394387		-0.103951		48.4602	5
CC_OL_018_P05	-0.152916	25.8116	-0.11106		-0.642401	2.76482	-0.738309	0	-0.745903	1.56915	0.134019	29.5603		5
CC_OL_019_H11	-0.0335847		-0.0124389		0.0974851		0.0872451		-0.000392974		-0.2486	33.2771	40.0133	5
CC_OL_019_H19	-1.12634	8.31651	-0.151195		0.326121	13.5015	0.263274		-0.189492	19.8042	0.29993	22.3838	19.7483	5
CC_OL_019_J06	-0.0158483		-0.14212		0.302441	33.8404	-0.0751213		-0.0179929		0.0654065	37.1539		5
CC_OL_019_N18	-0.0744503		0.174277		0.0464771		0.039709		-0.39198	16.4559	-0.0148975	44.0973	8.07623	5
CC_OL_020_C23	0.0787639	48.3647	-0.100641		0.0755712		0.0630449		0.182542		0.109958	47.0896	48.4602	5
CC_OL_020_K15	0.119756		0.244581		0.215427	26.8456	0.206721	26.4536	0.0321354	42.1044	-0.0131128		36.5087	5
CC_OL_020_M04	0.0372538		0.0272358		0.0156712		-0.00228311		0.152759	42.1044	0.255922	12.1023	25.8284	5
CC_OL_020_P04	-0.0470038		0.031898		0.174284		0.0199153		-0.00546139		0.210361	44.0973		5
CC_OL_021_D13	-0.924237	0	-0.759372	2.7164	-0.859558	0	-0.904602	0	-0.686302	5.53818	-0.0114152	47.0896	20.8934	5
CC_OL_021_E14	-0.932452	8.31651	0.235102		-0.184992		0.1938	28.1875						5
CC_OL_021_N08	-0.737147	8.31651	-0.00295013		0.296871		-0.088618		0.369522		0.153915	15.0033	32.8143	5
CC_OL_022_F03	-0.256359	48.3647	-0.216439	40.2379	0.0694895		-0.158758		-0.425807	16.4559	0.0107359	47.0896		5
CC_OL_022_H23	-0.0490245		-0.311882	17.2634	0.110658	46.9822	0.0550997		0.435128	37.6844	-0.05996			5
CC_OL_022_L04	0.252189	3.31382	0.174125		0.0948494		0.0402466		0.127946		-0.109674		8.87849	5
CC_OL_024_J12	0.299827	7.17452	0.0261778		-0.0969099		0.145388	38.5493	-0.213998	31.2984	0.0139013		20.8934	5
CC_OL_025_A20	-0.100453	33.7527	-0.0783322		0.402823	26.8456	-0.0885154		0.0619832	42.1044	0.00804372	49.9057	32.8143	5
CC_OL_025_B23	0.0600893	48.3647	-0.113222	49.244	-0.310567	2.38721	-0.272124	15.5702	-0.545765	0	-0.535609	4.14154	8.07623	5
CC_OL_025_D02	0.0522814	37.5172	0.0158902		0.184882	33.8404	0.0589975		0.398168	37.6844	0.270108	15.0033	46.6954	5
CC_OL_026_G10	0.229795	10.3357	0.0854663		0.169457	26.8456	0.141901	34.9677	-0.0259919		0.107766	33.2771	45.0807	5
CC_OL_026_I06	0.247032	8.31651	0.254082		0.0647829		-0.253638	28.1875	-0.259979	26.3119	-0.16032		3.97255	5
CC_OL_027_D01	0.112206	13.6381	-0.0226514		-0.207005		0.0531737		-0.194801	26.3119	-0.263309			5
CC_OL_027_D06	-0.0678563		0.0238184		0.119059	26.8456	0.179177	46.4198	0.028803		0.213457	22.3838		5
CC_OL_027_H08	0.0378182		0.13147		0.374908	18.2822	-0.0230846		-0.0828285		-0.711736	37.1539	12.5609	5
CC_OL_027_K14	0.17725	22.2561	-0.375942	49.244	0.083847		-0.113233		0.097757	46.4921	-0.0492386			5
CC_OL_027_M12	-0.0484493		0.0693832		0.143254		0.177487	31.3506	0.0252355		-0.862062	3.22942	31.0409	5
CC_OL_027_M14	-0.125607		-0.418463	49.244	-0.353433	9.15258	-0.115082	34.9677	-0.302424	26.3119	0.0386891	22.3838	32.8143	5
CC_OL_028_J22	0.0674216	40.8778	0.218848		0.149427		0.116913		0.317247	46.4921	-0.0561268		46.6954	5
CC_OL_028_K05	-0.978056	4.63086	-0.192844		0.258755	42.2193	-0.10433		-0.00961595		0.590776	18.8282	18.3434	5
CC_OL_028_N02														5
CC_OL_029_B18	0.157026	25.8116	-0.0614462		-0.112457		0.113123		0.168348		0.170057			5
CC_OL_029_G09	-0.151963	37.5172	-0.226246		-0.269909	6.03974	-0.355378	6.78638	-0.340466	17.9191	-0.015335			5
CC_OL_029_N13	-0.564291	8.31651	-0.530328	37.0587	-0.932903	0	-0.494889	3.62885	-0.8645	0	-0.0999383		41.6943	5
CC_OL_030_B10	-0.0302236		0.225859		0.255058	37.2031	0.102583		-0.216712	28.6663	-0.349979	33.2771	8.87849	5
CC_OL_030_H16	0.128076	25.8116	-0.0567624		-0.449236	8.15431	-0.353417	10.4046	-0.166065		0.37252	49.9057		5
CC_OL_030_H17	-0.519329	5.5422	-0.272239	19.9555	-0.772721	2.38721	-0.928406	3.9376	-1.02319	0.684721	0.0633421	44.0973		5
CC_OL_031_I05	0.045888		-0.0564755		-0.68931	5.3725	-0.266752	19.9495	-0.309022	19.8042	0.41162	6.39063	45.0807	5
CC_OL_031_K02	0.18511	25.8116	-0.116991		-0.367454	26.8456	-0.121169	34.9677	-0.133864	42.1044	0.724452	5.33638	34.526	5
CC_OL_032_P06	-0.0541556		-0.146114		-0.117173		0.320978		0.302656	37.6844	0.487338	12.1023	19.7483	5
CC_OL_033_C23	-0.286477	48.3647	-0.0232307		0.109785	42.2193	0.138925		0.211384		-0.134895	44.0973		5
CC_OL_033_H19	0.259388	22.2561	0.0982414		-0.175536		-0.050739		0.142318	42.1044	-0.0152413	49.9057	31.0409	5
CC_OL_033_H20	-0.378024	1.18865	-0.403481	2.7164	-0.246101		-0.0488588		-0.0654487		0.144428	22.3838	20.8934	5
CC_OL_033_L15	-0.265919	15.9625	0.318932		0.0753197	46.9822	0.0787613		-0.19562	42.1044	0.025428			5
CC_OL_033_N14														5
CC_OL_034_A23	0.0316072		0.181583		0.220888	26.8456	0.152808	42.6069	-0.0683263		-0.314106	22.3838	8.87849	5
CC_OL_034_D11	0.201826	22.2561	0.147676		0.285979	14.9963	0.0572628		-0.0656375		0.00772768		11.557	5
CC_OL_035_L23	0.0346841		-0.111028		0.054495		-0.0178504		0.442431	42.1044	-0.0744638			5
CC_OL_001_G02	-0.514958	1.85743	-0.312401	24.3011	-0.0909908		-0.131189		-0.0860628		-0.823974	2.33695		6
CC_OL_001_M08	-0.275853		-0.049126		0.0115951		0.115327	42.6069	0.173451	46.4921	0.0953877		32.8143	6
CC_OL_002_D20	-0.470994	2.2718	-0.207928		-0.413734		-0.0299082		-0.111197		-0.8123	3.31894		6
CC_OL_002_D23	0.00814268		0.0453864		-0.0913154		-0.0859219		-0.0679048		-0.185504	18.8282	15.7073	6
CC_OL_002_F13	-0.619496	3.31382	-0.00303385		-0.246674		0.0994812		-0.0188424		-0.192961	37.1539	45.0807	6
CC_OL_002_G14	-2.16583	0	-1.09198	0	-0.18567		0.00485479		0.257243		-0.406646	9.83445	3.97255	6
CC_OL_002_H06	-0.975489	1.18865	-0.509106	18.9828	0.362625	18.2822	0.204263	22.1072	-0.356987	46.4921	-0.971034	1.19021		6
CC_OL_002_J03	-0.787274	0	-1.03517	2.20248	-0.517548	16.7058	-0.491913	3.62885	-0.460847	16.4559	-0.809526	2.33695	48.4602	6
CC_OL_002_K02	-2.50373	0	-1.31694	0	0.156943		0.0271092		-0.0328802		-0.785979	8.05179	15.7073	6
CC_OL_002_L10	0.0848197	37.5172	-0.0812566		0.241452	29.8948	0.106001		-0.198842	37.6844	-0.323899	25.9325	14.3906	6
CC_OL_002_N09	0.0916872	44.9968	0.0893661		-0.000181986		0.0687434	49.7484	-0.129242	34.569	-0.206353	15.0033	10.2741	6
CC_OL_002_N10														6
CC_OL_003_B15	-0.384891	12.0207	-0.127875	34.5567	0.0903423		0.0729185		-0.231287	37.6844	-0.256322	33.2771		6
CC_OL_003_E01			-0.408267		0.333139		-0.292913		0.411177	42.1044	-0.275453			6
CC_OL_003_H07	-0.0336379		0.0397523		0.199046		0.145543	46.4198	0.0324846		-0.0435897			6
CC_OL_003_J23	-0.32774	6.38553	-0.0750161		0.0189809		0.0759067		0.000231929		-0.387415	8.05179		6
CC_OL_003_N12	-0.660878	2.91035	-0.376423	15.8136	-0.0158318		-0.079029		0.0759569		-0.185509	37.1539	20.8934	6
CC_OL_003_N15	-0.706395	1.85743	-0.576532	15.8136	0.0638704		-0.158932		-0.138449	37.6844	-0.536589	18.8282	43.4785	6
CC_OL_003_O13	-0.537809	3.78856	-0.275555	45.1357	0.189889	46.9822	0.0805892		0.314505	26.3119	0.96215	3.22942	0	6
CC_OL_003_P17	-0.18289	29.718	0.0246678		0.21377	42.2193	0.22905	34.9677	0.354418	37.6844	0.0488175		41.6943	6
CC_OL_003_P24	-0.230738	25.8116	-0.500508	0	-0.185138		0.197235		0.0877674		0.448469	5.33638	2.84897	6
CC_OL_004_A09	-0.167305	22.2561	-0.404649	18.9828	0.0271913		0.121337	46.4198	0.152643		-0.339177	33.2771	41.6943	6
CC_OL_004_A24	-0.00237555		0.0874588		0.11061		-0.0499282		-0.144743		-0.724746	0.835227	8.07623	6
CC_OL_004_B07	-3.29954	1.85743	-1.00356	2.29555	0.272692	42.2193	0.0971347		-0.309667		-1.42814	0	24.012	6
CC_OL_004_J18	-0.124437		-0.234803		-0.240877		-0.155811		-0.0948612		0.0616536	49.9057		6
CC_OL_005_M08	-0.151265		-0.114532		0.172526		0.208484	38.5493	-0.0891745		0.137248	18.8282	36.5087	6
CC_OL_005_N04	-0.739022	0	-0.651473	2.29555	0.202301	37.2031	0.165226	46.4198	-0.487065	5.53818	-0.31936	33.2771	34.526	6
CC_OL_006_K17	0.0180059		0.0757579		0.0842428		0.108196	49.7484	0.186561	46.4921	0.306025	12.1023	18.3434	6
CC_OL_006_L01	-0.149037		-0.00287285		0.18044		0.135677		0.823715	14.9433				6
CC_OL_006_M20	-2.43004	2.2718	-0.765969	6.86996	0.639155	26.8456	0.216252	14.0943	-0.126185		-1.57493	0.227939	32.8143	6
CC_OL_007_M05	-0.683751	2.32496	-0.366173	7.3077	-0.0189967		0.143818		-0.0792247		-0.484621	12.1023	36.5087	6
CC_OL_007_O20	-0.0306352		0.00152392		-0.00249711		0.0868769		-0.0191933		0.239598	40.5623		6
CC_OL_008_F08	0.17158	15.9625	0.0864747		-0.0529149		0.0130333		-0.094434		-0.362575	4.14154	10.2741	6
CC_OL_008_L23	-0.826235	1.84902	-1.19722	11.3554	0.152127		0.0527391		-0.334242	16.4559	-0.761947	3.31894	45.0807	6
CC_OL_008_N16	-0.292074	4.63086	-0.239689	15.8136	-0.195961		-0.0477515		-0.273341	34.569	-0.299048	49.9057	45.0807	6
CC_OL_009_E08	-0.161249		-0.213497		0.0910077		-0.0118586		0.190857		-0.0273214		49.9559	6
CC_OL_009_H22	-1.487	0.714747	-1.19323	2.29555	-0.135226		-0.0930988		-0.451846	21.4061	-0.797221	22.3838	24.012	6
CC_OL_009_I12	-2.281	0	-1.4101	0	-0.378735	46.9822	-0.235305	31.3506	0.46666	31.2984	0.359592	22.3838	0	6
CC_OL_009_I20	-0.123546		0.23119		0.0184953		0.0929817		0.0419772		0.236258			6
CC_OL_009_M07	-0.22758	44.9968	-0.0103977		-0.614135	11.0134	-0.750777	7.8752	-0.477883	16.4559	-0.128361		40.0133	6
CC_OL_009_O12	-0.281491	13.6381	-0.123109		0.122526	42.2193	0.0447675		-0.0103366		-0.487573	18.8282		6
CC_OL_009_O22	-0.13405		-0.178787	34.5567	-0.113289		0.0478286		-0.0890472		-0.354313	9.83445	31.0409	6
CC_OL_010_D10	-0.163866	22.2561	-0.232538	40.2379	0.0333716		0.0299302		-0.325995	42.1044	-0.471268	4.14154		6
CC_OL_010_K06	-0.373595	2.2718	-0.259063		-0.0379537		-0.0701481		-0.74988	5.53818	-0.563957	0.835227	11.557	6
CC_OL_010_K10	-0.135705	33.7527	-0.0891061		-0.116575		-0.16465	49.7484	0.0921894		0.0178712	47.0896		6
CC_OL_010_L02	-0.64686	2.2718	-0.458365	8.50522	-0.00342941		-0.0657409		0.0862403		-0.178332	29.5603	12.5609	6
CC_OL_011_I14	-0.0478636		-0.0483993		0.123351		0.268925	19.9495	0.308154	37.6844	-0.308566			6
CC_OL_012_F24	0.128785	25.8116	-0.105193		-0.221679	16.7058	-0.152094	42.6069	-0.0618095	37.6844	-0.0324597			6
CC_OL_012_H11	0.132516	40.8778	-0.1036		-0.0317851		0.000761842		0.000612429		-0.0202017		49.9559	6
CC_OL_012_H23	-0.259925	10.3357	-0.0839379		0.193921		0.0711774	46.4198	-0.0516829	46.4921	-0.162997	29.5603	45.0807	6
CC_OL_012_K06	-0.338721	15.9625			0.137842		-0.178123		0.0792697		0.103356		48.4602	6
CC_OL_013_C03	0.0851082		-0.218818	49.244	-0.0580575		0.164081	46.4198	0.423752	26.3119	0.382642	12.1023	7.26894	6
CC_OL_013_C16	-0.185836	33.7527	0.0656448		-0.0693482		-0.0983226		-0.226065	37.6844	-0.0669535	40.5623	45.0807	6
CC_OL_013_F21	-0.64503	4.63086	-0.345568	21.9863	-0.049542		0.106291		0.0344264		-0.771667	6.39063	40.0133	6
CC_OL_014_A17	-0.332406	4.63086	-0.0369256		-0.183053		-0.0407107		-0.0314298		-0.171674	29.5603		6
CC_OL_014_E03	-0.569384	12.0207	-0.377612	13.9394	0.273777		0.152791	46.4198	0.365193	28.6663	1.04081	8.05179	0.511075	6
CC_OL_014_H23	0.058722	48.3647	0.168083		-0.183927	16.7058	-0.167104	31.3506	0.20314	42.1044	0.291707	15.0033	40.0133	6
CC_OL_014_J11	-0.472702	3.31382	-0.527593	19.9555	0.126455	42.2193	-0.00301459		0.13777	46.4921	0.0129194		24.012	6
CC_OL_014_L22	-0.196961	15.9625	-0.095959		0.127401		-0.0547876		-0.00637617		-0.136531	49.9057		6
CC_OL_014_P05	-0.187212	33.7527	-0.116073		0.109796	46.9822	0.0720881		0.125545		-0.761531	2.33695	38.2545	6
CC_OL_015_B20	0.021512	40.8778	0.0600468		-0.122207		-0.148943		0.0111561		0.110798	29.5603		6
CC_OL_015_E17	-0.496382	5.5422	-0.556262	26.5964	0.232565	42.2193	0.176097		-0.221798	42.1044	-0.683542	3.22942		6
CC_OL_015_G08	-0.183936	33.7527	0.116013		0.297267	37.2031	0.108346		-0.00977868		0.10798			6
CC_OL_015_G22														6
CC_OL_015_K05	-0.397224	25.8116	-0.0176085		-0.163879	33.8404	-0.0983105		0.121439	46.4921	0.666727	12.1023	14.3906	6
CC_OL_015_L18	-0.0989502		0.0983853		-0.0659821		-0.323273	2.02637	-0.550533	6.05829	-0.33924	5.33638	6.34878	6
CC_OL_016_J05	-0.743682	1.85743	-0.370466	6.86996	-0.23669		-0.200451		-0.0804819	42.1044	-0.26307		22.1877	6
CC_OL_017_A07	0.0869619		-0.0491973		-0.0341978		-0.166232	31.3506	-0.274622	17.9191	-0.052246		43.4785	6
CC_OL_017_F19	0.0908978	29.718	-0.350452	28.7086	0.133336		0.0830267		-0.0983583		-0.817183	0	12.5609	6
CC_OL_017_H04	0.192261	15.9625	-0.120969		-0.143978		-0.011067		-0.196376	37.6844	0.35388	33.2771		6
CC_OL_017_K08	-0.264591	8.31651	-0.466321	37.0587	-0.517152		-0.353402	3.62885	-0.00536018		-1.39168	0.835227	31.0409	6
CC_OL_017_P13	0.0973546	48.3647	-0.0395973		-0.0604737		0.0827833		-0.096917		-0.388572	3.22942	12.5609	6
CC_OL_017_P15	-0.431992	12.0207	-0.101846		0.284516	46.9822	0.0701985		-0.203537		-0.397177			6
CC_OL_017_P20	0.181425	29.718	0.0596802		-0.367595	42.2193	0.119283		0.161934	37.6844	-0.380747	49.9057	38.2545	6
CC_OL_018_C18	-0.100996		0.116298		0.555311	8.15431	0.440723	24.6475	0.0572016		-0.0279373			6
CC_OL_018_G04														6
CC_OL_018_G12	0.0404393		-0.00300088		-0.0199925		0.014546		0.112054		0.0294365			6
CC_OL_018_H04	0.061331		-0.0126356		0.207074	33.8404	0.111876		0.0466691		-0.545515	9.83445	31.0409	6
CC_OL_018_O09	0.115955	25.8116	0.131248		0.0701113		0.103623		-0.0563589	46.4921	-0.18143	9.83445	15.7073	6
CC_OL_019_A11	-0.285927	6.38553	-0.325518	34.5567	0.135055		0.0971503	49.7484	0.00673765		-0.533893	1.68706		6
CC_OL_019_C07	0.0690043	40.8778	-0.266156	45.1357	0.0128543		0.115142		0.0102982		0.200668	37.1539	46.6954	6
CC_OL_019_D07	-0.196559	40.8778	-0.0391691		0.0521152		0.0107727		0.0633923		-0.432829	12.1023		6
CC_OL_019_H20	-0.189668	25.8116	-0.24103	37.0587	-0.0808453		0.0292675		-0.121003		-0.243413	29.5603		6
CC_OL_019_K10	-0.240105	40.8778	-0.106834	40.2379	0.0727659		0.222936	17.4104	-0.00900831		-0.130946	37.1539		6
CC_OL_019_P06	-0.0686695		-0.28076	40.2379	0.0610145		-0.0688475		-0.44295	8.3482	-0.460321	8.05179	29.2653	6
CC_OL_019_P18	-0.144435	22.2561	-0.419016	31.8463	0.105468		-0.0921232	38.5493	0.0385773		0.00527049	25.9325		6
CC_OL_019_P21	-0.21206	25.8116	-0.118795		-0.0119926		0.126532	42.6069	-0.236969	31.2984	0.0204753			6
CC_OL_020_C17	-0.210558	25.8116	-0.434881	40.2379	0.272298	23.4001	0.00186972		0.12523	42.1044	-0.220036	44.0973	41.6943	6
CC_OL_020_I08	-0.114919	40.8778	-0.125183		0.00252691		-0.0419576		0.00685332		0.451827	8.05179	15.7073	6
CC_OL_020_I16	-0.371338	6.38553	-0.457647	3.77277	-1.4347	0	-0.70283	4.4309	-0.660024	8.3482	-0.341739	15.0033		6
CC_OL_021_A03	-0.133751		0.0952802		-0.00153684		-0.182097		0.250845	37.6844	0.168719	37.1539	38.2545	6
CC_OL_021_A09	-0.293727	33.7527	0.0643481		0.136529	46.9822	0.307189	15.5702	-0.100204		-0.527358	5.33638		6
CC_OL_021_B10	-0.0189392		-0.0366161		-0.0342877		0.0443958		0.200567		0.0144545			6
CC_OL_021_E09	-0.110111	40.8778	-0.269301		-0.103736		-0.155781	46.4198	0.00294109		0.80864	9.83445	17.0611	6
CC_OL_021_K11	-0.0174343		0.0941072		0.071032		0.0177993		0.0185586		0.125622			6
CC_OL_023_C20	-0.0262883		-0.354321	37.0587	0.243102	33.8404	0.0366517		0.0350294		-0.21109	25.9325		6
CC_OL_024_D03	-0.173069		0.0984348		-0.0748185		-0.0764617		-0.301961	34.569	0.401835	15.0033	25.8284	6
CC_OL_024_G20	0.0410833		-0.152649		0.0764008		0.128655		0.0123032		0.0470629	40.5623	45.0807	6
CC_OL_024_M07	0.13328	25.8116	0.210647		0.0285056		-0.104985		-0.059328		-0.136065		14.3906	6
CC_OL_024_O06	-0.0318721		-0.0207272		-0.123495		-0.123495	42.6069	-0.608441	24.385	-0.53642	12.1023	2.09221	6
CC_OL_025_F24	0.32191	2.32496	-0.269909	40.2379	-0.045972		-0.0740952		0.0808565		-0.108992	40.5623	46.6954	6
CC_OL_025_H21	0.0337877		0.14038		0.077803		-0.0524381		0.00496915		-0.244331	40.5623	25.8284	6
CC_OL_025_J04	-0.135838		0.0860462		-0.67497	2.98492	-0.567606	10.4046	-0.207666	42.1044	0.274977	18.8282		6
CC_OL_026_J15	-0.260758	29.718			0.975713	4.42277	0.796583	0	0.65341	31.2984	0.626173	9.83445	22.1877	6
CC_OL_027_D17	0.243275	15.9625	0.400262		0.0445223		0.0652435		0.0235002		-0.275915	22.3838	8.07623	6
CC_OL_027_K10	-0.199671	25.8116	-0.0342331		0.194968		0.162256	38.5493	0.407551	42.1044	0.176868	37.1539	27.6504	6
CC_OL_027_P05	-0.0297294		-0.0659331		0.207678		-0.157529		0.0210536		0.251823	18.8282	34.526	6
CC_OL_028_A24	-0.488451	3.78856	-0.371563	13.9394	-0.405235	26.8456	-0.18603	28.1875	-0.23495	46.4921	0.387653	15.0033	11.557	6
CC_OL_028_E21	-0.0345696		-0.0517584		-0.30081		-0.172871		0.137239		-0.00962327			6
CC_OL_029_F15	0.145417	13.6381	0.29895		0.140536		-0.119239		0.547815	37.6844	-0.163181	33.2771	34.526	6
CC_OL_029_H21	-0.0262017		0.150735		-0.0475904		0.00482115		0.363492	37.6844	0.464807	47.0896	41.6943	6
CC_OL_029_I08	-0.135266	8.31651	-1.31959	18.9828	0.403788	33.8404	0.221376	15.5702	0.031775		0.104825		31.0409	6
CC_OL_029_J09	0.0575279		-0.259274	49.244	-0.0876618		0.0385056		0.0289524		-0.125498	25.9325	49.9559	6
CC_OL_030_C20	-0.26752		-0.791777	6.86996	-0.0795019		-0.137208		0.061791		-0.47672	33.2771		6
CC_OL_030_F24	0.131526	44.9968	0.0370813		0.272454	37.2031	0.121302	38.5493	0.0536827		-0.0960284		32.8143	6
CC_OL_030_K24	0.241509	25.8116	-0.0239609		-0.00320551		0.0408749		-0.0580394		0.277085	15.0033		6
CC_OL_030_M13	-0.208047	4.63086	-0.176539		0.0614435		-0.0625105		-0.37892	6.33755	-0.13399			6
CC_OL_031_F06	0.195071	33.7527	-0.0510191		0.122556		0.117776		0.257549	46.4921	-0.676245	22.3838	24.012	6
CC_OL_031_F22	-0.092586		-0.0914352		0.084645		0.0892526	49.7484	0.104338		-0.17028	29.5603		6
CC_OL_032_B06	-0.273804	12.0207	-0.216133		-0.237125		0.152532		-0.483708	6.33755	-0.622833	3.31894		6
CC_OL_032_E10	-0.195437	40.8778	-0.221327	34.5567	-0.0387578		0.199181	46.4198	-0.00458776		0.0702912		40.0133	6
CC_OL_032_G24	-0.150584	37.5172	-0.110769		-0.0682929		-0.0497432		-0.100645		-0.373324	5.33638	49.9559	6
CC_OL_032_K12	-0.0113889		-0.188824		-0.109585		-0.0896791		-0.238891	26.3119	-0.416879	18.8282	20.8934	6
CC_OL_032_L05	-0.13599		0.150082		0.0791037		0.0743068	49.7484	-0.65554	6.05829	0.0719007	49.9057	43.4785	6
CC_OL_032_N08	-0.346164	8.31651	-0.306798	45.1357	-0.251542		-0.266612	38.5493	0.444558	37.6844	0.0301071		29.2653	6
CC_OL_032_O12	-0.168556		-0.0826866		0.067695		-0.138697		0.105648		0.243776		36.5087	6
CC_OL_033_B17	-0.27239	48.3647	0.00718966		-0.660399	6.72025	-0.368293	7.8752	-0.374818	17.9191	-0.450965	3.22942	29.2653	6
CC_OL_033_L14	-0.211687	29.718	-0.1454	40.2379	0.0169721		-0.0636609		0.021258		-0.385021	15.0033		6
CC_OL_034_B07	0.0424678	22.2561	-0.0463247		0.260789	37.2031	0.149731	46.4198	0.321539	42.1044	0.292674	15.0033	22.1877	6
CC_OL_034_D20	-0.29867	10.3357	-0.418601	31.8463	-0.160559		-0.227408	31.3506	-0.0938557	42.1044	-0.113884		36.5087	6
CC_OL_034_F21	-0.511566	19.0265	-0.397502	8.50522	0.0906386		0.259805	49.7484	-0.0580229		-0.168419	40.5623	34.526	6
CC_OL_034_G05	-0.573907	4.63086	-0.404566		-0.0726501		0.0932696	49.7484	0.277812		0.1358	44.0973	20.8934	6
CC_OL_034_K18	-0.209619	25.8116	-0.100588		-0.0456065		-0.0534145		-0.376197	11.3424	-0.708294	1.68706	15.7073	6
CC_OL_034_M08	-0.122186	25.8116	-0.269425	34.5567	-0.514594	2.76482	-0.594653	7.8752	-0.192345	28.6663	0.0662429	40.5623	38.2545	6
CC_OL_035_A03	-0.176402		0.0772737		-0.116278		-0.09058		-0.0317575		0.0121753	49.9057		6
CC_OL_035_D15	-0.287483	48.3647	-0.575869		0.0918037		0.0425993		0.166494	42.1044	0.0685201		34.526	6
CC_OL_035_M02	-0.044509		-0.378843	18.9828	-0.165271	23.4001	-0.0654925		-0.0511306		0.431387	8.05179	20.8934	6
CC_OL_001_B14	-0.530391	2.10777	-0.108805		0.32907	26.8456	0.381629	3.25269	-0.313843	24.385	-0.0451593	33.2771	25.8284	7
CC_OL_001_D09	0.0730631		-0.278667		0.0216002		0.0298446		-0.116298		-0.0404812			7
CC_OL_001_I21	0.0607289	33.7527	-0.164974	49.244	-0.0179412		0.0327147		-0.536583	8.3482	0.183227	29.5603		7
CC_OL_001_K09	-1.62138	1.85743	-0.970522	2.20248	-0.202567		-0.16362		-0.217885		-0.375758	9.83445	14.3906	7
CC_OL_001_M22	0.209132	10.3357	-0.535866	2.20248	-0.29125		-0.0723065		0.350561	37.6844	0.396808	37.1539	32.8143	7
CC_OL_001_N03	-0.0508158		-0.000236941		0.0312756		-0.0239972		-0.11065	42.1044	0.489851	6.39063	27.6504	7
CC_OL_001_N13	-0.816872	1.18865	-0.863957	0	-0.237776		0.173726	49.7484	-0.254589	26.3119	-0.448076	8.05179	38.2545	7
CC_OL_001_P10	-0.213164	25.8116	-0.160805		0.198939	37.2031	-0.0719154		0.390941	37.6844	0.47066	4.14154	20.8934	7
CC_OL_002_I02	-0.554361	5.5422	-0.176104		-1.45357	0	-1.06172	0	-1.49896	1.23474	-2.16934	0	0.760804	7
CC_OL_002_J15	-0.268373	13.6381	-0.27454	26.5964	-0.0773265		-0.166229		0.231235		0.814672	0.20657	2.01659	7
CC_OL_002_J22	-1.38377	2.2718	-0.849237	2.29555	0.0876252		0.196078	46.4198	-0.444543	6.05829	-1.36046	0		7
CC_OL_002_M04	0.125833				-0.161765		-0.0212686		0.189911	42.1044	-0.370495	25.9325	48.4602	7
CC_OL_002_M10	-0.973129	1.18865	-1.27423	1.23473	-0.366117		-0.0414094		0.35974	34.569	-1.71025	0		7
CC_OL_002_N02	-0.17787	37.5172	-0.393368		-0.216066		-0.0844684		0.185722		0.0591806		48.4602	7
CC_OL_002_P23	0.0860933	25.8116	-0.0760008		-0.0561026		-0.116947	28.1875	0.214119	42.1044	-0.0350362			7
CC_OL_003_A08	-0.837256	3.78856	-0.0885907	45.1357	0.0532926		0.176211	38.5493	-0.357637	6.33755	-2.03615	0	19.7483	7
CC_OL_003_A15	0.091643	29.718	-0.668141	49.244	-0.463782		-0.275086	38.5493	-1.0386	0	-0.996585	0	1.62381	7
CC_OL_003_G11	0.238748	12.0207	-0.0612387		-0.259632		-0.165149	28.1875	-0.0769724	34.569	0.198702	22.3838		7
CC_OL_003_H01	0.128284	13.6381	0.0278491		-0.0718992		-0.138691	34.9677	-0.0156		0.715096	5.33638	32.8143	7
CC_OL_003_H05	0.0645185		-0.143872	45.1357	-0.201457		-0.174647		0.0621442		0.185092	22.3838	29.2653	7
CC_OL_003_H12	-0.441875	3.31382	-0.559546	2.29555	0.168065	37.2031	-0.0469966		-0.0472034		-0.454177	3.22942	46.6954	7
CC_OL_003_H17	-0.679483	8.31651	-0.195436	45.1357	0.218566	42.2193	0.0844119		0.0236526		0.219453	22.3838	19.7483	7
CC_OL_003_K07	0.180515	19.0265	0.0910165		0.302193	37.2031	0.0346546		-0.310072	26.3119	-0.112847		7.26894	7
CC_OL_003_M20	-1.49593	0	-0.766145	2.20248							-0.832071	0.541822	43.4785	7
CC_OL_004_B19	-0.0184617		-0.158392	37.0587	-0.194669		-0.233301	14.0943	0.00791656		0.195743	25.9325	40.0133	7
CC_OL_004_D12	-0.122648		-0.131376	45.1357	-0.316141	23.4001	-0.22796	22.1072	0.156305		0.907035	6.39063	19.7483	7
CC_OL_004_E07	-0.274182		-0.282691		-0.0625262		0.070744		0.0913089		-0.343221	40.5623		7
CC_OL_004_F17	0.143004	33.7527	0.0152344		-0.044259		-0.449966	22.1072	-0.160214		-0.758336	2.6814	1.65311	7
CC_OL_004_L12	-0.00243209		-0.111349		0.104659		0.050447		-0.000855516		0.165284	18.8282		7
CC_OL_004_M07	0.302754	15.9625	0.0645925		0.00740233		-0.073785		-0.25514	24.385	-0.412878	4.14154	0.760804	7
CC_OL_004_N15	0.304316	10.3357	-0.00243486		0.1115		0.166708	38.5493	0.194607	42.1044	0.846158	6.39063	18.3434	7
CC_OL_005_B01	-0.472976	3.31382	-0.475909		0.188672	33.8404	0.00568863		-0.505362	3.79306	-0.289975			7
CC_OL_005_F14	0.841922	1.402	0.484503		0.618396	2.76482	0.504254	3.9376	0.332563	42.1044	0.667541	6.39063	45.0807	7
CC_OL_005_F21	-0.3627	19.0265	-0.188829		-0.117318		-0.127046		-0.0991646		-0.606071	5.33638		7
CC_OL_005_K06	-0.297641	44.9968	-0.349029		0.143492		-0.0363805		0.325986	37.6844	0.362792	9.83445	6.34878	7
CC_OL_005_K07	-0.107051		0.346545		0.0789009		0.00112152		-0.0937315		-0.0681909		31.0409	7
CC_OL_005_O21	0.0524072	29.718	-0.00493185		0.0422393		-0.0457085		-0.213734	26.3119	0.15576	33.2771		7
CC_OL_006_A16	-0.110057		0.0105515		-0.107145		-0.155795	38.5493	-0.0578607		-0.061363			7
CC_OL_006_B16	-0.120505	48.3647	-0.10469		0.122533		-0.102615	38.5493	-0.465781	5.31916	-0.651453	6.39063	6.34878	7
CC_OL_006_C22	0.103445	25.8116	-0.208433	37.0587	-0.0799751		-0.0390951		-0.0442404		-0.119189	29.5603	31.0409	7
CC_OL_006_I22	-0.0067994	44.9968	0.00943986		-0.139548		-0.182121		-0.17285		-0.232626	22.3838	10.2741	7
CC_OL_006_J20	0.0983185	48.3647	-0.460184	24.3011	-0.117017		-0.0392577		0.0225933		0.125839	25.9325	45.0807	7
CC_OL_006_K15	-0.602353	2.2718	-0.020904		0.273863	16.7058	0.197198	46.4198	-0.145008	37.6844	-1.17421	0	34.526	7
CC_OL_007_F11	-0.0149127		-0.0161892		0.0803941		0.0110468		-0.318963	46.4921	-0.577639	3.22942	11.557	7
CC_OL_007_J16	-0.149517	44.9968	-0.225106	49.244	0.137157	37.2031	0.0914918	42.6069	0.0644047		0.616315	5.33638	14.3906	7
CC_OL_007_K07	0.223867	22.2561	-0.143292	40.2379	-0.116991		-0.0571436		-0.00843494		-0.374405	8.05179	19.7483	7
CC_OL_007_M02	-0.190855		-0.00955499		0.00800131		0.0243807		-0.0762016		0.165722	44.0973		7
CC_OL_008_B12	0.0546733	48.3647	0.0775815		-0.0590137		-0.109589	31.3506	-0.0114972		-0.034262		43.4785	7
CC_OL_008_H19	0.214047	25.8116	-0.0832659		0.287648	46.9822			0.125789		-0.374034	15.0033		7
CC_OL_008_L12	-0.357223	6.38553	-0.236777	45.1357	-0.209873	29.8948	-0.199757		-0.11858		-0.0949603	40.5623	38.2545	7
CC_OL_008_O24	-0.396268	1.85743	-0.195453	37.0587	-0.316995	7.65896	-0.216826	12.4531	0.018736		-0.553071	3.22942		7
CC_OL_009_B18	-0.507406	5.5422			-0.690494	14.9963	-0.440409	22.1072	0.447432	42.1044	0.239301	15.0033	19.7483	7
CC_OL_009_E20	0.189009	33.7527	-0.0844223		-0.182958		0.185159	38.5493	-0.0511145		-0.092915		40.0133	7
CC_OL_009_G09	-0.136884	40.8778	-0.170067	49.244	0.135841		0.141652	31.3506	0.0839343		0.254457	15.0033	34.526	7
CC_OL_009_L10	-0.000806635		0.167468		0.16741	37.2031	0.192416	46.4198	0.134899		0.212139	18.8282	36.5087	7
CC_OL_009_M13	0.248534	15.9625	0.232469		0.215039	46.9822	0.0686611		0.320341	46.4921	-0.868844	4.14154	6.34878	7
CC_OL_009_M19	-0.189089	13.6381	-0.296616	49.244	0.0135314		-0.0388848		-0.263363	24.385	-0.0195202			7
CC_OL_009_O23	-0.126776	33.7527	-0.277447	34.5567	-0.298986		-0.251031		-0.195131	31.2984	-0.495228	12.1023	34.526	7
CC_OL_010_B11	0.121092	33.7527	0.254474		0.13183	46.9822	0.00404569		-0.17635		-0.315796	25.9325	10.2741	7
CC_OL_010_G02	0.0413311	44.9968	0.215504		-1.41002e-05		-0.107566		-0.186937		0.424121	37.1539		7
CC_OL_010_G05	0.205949	19.0265	0.035742		-0.110047		-0.0345547		-0.305149	28.6663	-0.548727	12.1023	3.97255	7
CC_OL_010_K07	0.147707	29.718	0.0752048		0.0539747		0.110956	49.7484	-0.250117	34.569	-1.01718	0	0.760804	7
CC_OL_010_N11	-0.0625764		-0.214708	45.1357	-0.228302	18.2822	-0.180407	26.4536	-0.119554		0.114814	29.5603	32.8143	7
CC_OL_010_P23	-0.0494388		-0.10339		0.182341		0.120538		-0.167501	37.6844	0.0892867	40.5623		7
CC_OL_011_A10	-0.407408	4.63086	-0.25945	26.5964	-0.132635		-0.029599		0.286869	42.1044	-0.443538	4.14154	38.2545	7
CC_OL_011_D02	0.172237	22.2561	-0.160013	40.2379	-0.0677279		-0.0449707		-0.124685	34.569	0.32756	15.0033		7
CC_OL_011_D05	-0.348492	25.8116	0.00378838		-0.148601		0.0504435		-0.377205	14.9433	-0.425379	18.8282		7
CC_OL_011_D06	0.133946	12.0207	0.136403		0.459692	33.8404	0.334178	24.6475	0.288602	37.6844	0.710058	9.83445	22.1877	7
CC_OL_011_H16	-0.368866	2.2718	-0.102343		0.161648	42.2193	0.0515952		0.120276		-0.565158	4.14154	38.2545	7
CC_OL_011_H21	0.212402	10.3357	-0.0712767		0.346893	33.8404	-0.156266		-0.262365	26.3119	-0.518468	6.39063	1.62381	7
CC_OL_011_H24	-0.0372946		-0.0375815		-6.869e-05		0.157111	42.6069	0.0172213		-0.303486	47.0896	41.6943	7
CC_OL_011_K22	0.0169001		0.196333		-0.0167753		-0.103154		0.106972		0.0089127	37.1539		7
CC_OL_011_L14	-0.0756193		-0.0732824		0.249929	23.4001	-0.067871		0.273806	46.4921	-0.164753	44.0973		7
CC_OL_011_N19	0.070528		-0.0201196		-0.0504934		-0.171068		-0.418948	14.9433	0.290751	47.0896	25.8284	7
CC_OL_011_O03	0.10881	19.0265	0.071838		0.278386	46.9822	0.157222	34.9677	-0.272742	12.7329	-0.453374		40.0133	7
CC_OL_011_O11	-0.059912		-0.13314	49.244	-0.00970634		-0.00583052		0.299514	37.6844	0.470482	9.83445	15.7073	7
CC_OL_011_O24	-0.0659128		-0.126753	49.244	-0.537431	18.2822	-0.481936	2.02637	-0.251681	17.9191	0.205262			7
CC_OL_011_P15	0.0826064	44.9968	0.134969		0.160277		0.160379	46.4198	0.298107	37.6844	0.288962	47.0896		7
CC_OL_012_C06	-0.15214		-0.416381	24.3011	-0.407672	14.9963	-0.437039	7.8752	-0.244539	26.3119	0.0137005	33.2771	41.6943	7
CC_OL_012_E18	0.260438	10.3357	0.632272	2.29555	0.362599	20.3752	0.435356	14.0943	0.320094	31.2984	-0.175899		12.5609	7
CC_OL_012_F21	-0.00692225		0.0465485		0.00767595		0.0179551		-0.246187	24.385	-0.252833	18.8282	15.7073	7
CC_OL_012_I06	-0.23464	33.7527	0.0654122		-0.235947		-0.146583	34.9677	-0.00466276		0.16989	44.0973	43.4785	7
CC_OL_012_I09	-0.289566	22.2561	0.0110226		-0.0211127		0.0287438		-0.130686	42.1044	-1.14704	0.541822	12.5609	7
CC_OL_012_I17	-0.0118024		-0.020718		-0.33218	13.5015	-0.164697	42.6069	0.175655		-0.263625	33.2771		7
CC_OL_012_L03	0.524054	2.32496	0.705158	49.244	2.2115	0	2.18034	0	0.958339	8.3482	1.21743	5.33638	46.6954	7
CC_OL_012_O01	-0.156439		-0.0420254		-0.0838657		-0.155601		-0.115978		0.349784	25.9325	27.6504	7
CC_OL_013_A24	0.103076		0.139456		-0.0102829		0.112993		0.211302	37.6844	0.307043	15.0033	29.2653	7
CC_OL_013_B02														7
CC_OL_013_H13	-0.230347	40.8778	0.0239587		-0.101266		-0.239557	15.5702	-0.191134		0.430507	33.2771	32.8143	7
CC_OL_013_O04	0.315571	19.0265	-0.407854		0.192487		-0.0816041	46.4198	-0.0404418		0.110188	29.5603		7
CC_OL_014_E05	0.0307512	33.7527	0.034636		-0.203748		-0.311464	22.1072	-0.0572226		0.0320888			7
CC_OL_014_J16	-0.10973		-0.135679		0.201929	37.2031	0.0490002		0.0710604		-0.113283	40.5623	48.4602	7
CC_OL_014_K06	-0.489152	12.0207	-0.0971986		-0.0269376		-0.0791006		-0.0804064		-0.754764	25.9325		7
CC_OL_014_M03	-0.109051	40.8778	0.0581932		0.225781	33.8404	0.00805523		0.0495068		0.803137	6.39063	18.3434	7
CC_OL_014_M18	-0.149115	25.8116	-0.124088		-0.0242237		0.0203396		0.128203	42.1044	-0.175296	33.2771		7
CC_OL_014_N15	-0.00463916		-0.151629	45.1357	0.0442933		-0.0338713		0.167393		0.394009	22.3838	32.8143	7
CC_OL_014_O04	-0.16473		-0.0479855		-0.0643192		-0.0715164		0.0280257		-0.0778179			7
CC_OL_015_I15	-0.4168	3.31382	0.0332736		-0.192107		-0.24401		-0.548823	2.73336	-1.81683	0	2.56407	7
CC_OL_015_P07	0.175933	12.0207	-0.0463346		-0.220507		-0.217135	34.9677	-0.245976	24.385	-0.244517	29.5603	5.07451	7
CC_OL_016_A22	-0.0338755		-0.0800126		0.145261	29.8948	0.0200623		0.225117	42.1044	0.154984	22.3838	25.8284	7
CC_OL_016_D10	0.0619387	48.3647	-0.076308		0.311712		0.116177	42.6069	-0.0312264		0.123167	40.5623		7
CC_OL_016_E05	-0.0576421		-0.277858	49.244	-0.225344	42.2193	-0.0474637		-0.000138155		0.201736	22.3838	32.8143	7
CC_OL_016_J02			-0.418501		0.118174				-0.302344		0.671881	12.1023		7
CC_OL_016_K20	-0.152426	40.8778	0.0956056		0.109741		0.114678	42.6069	0.117105	42.1044	0.295424	15.0033	14.3906	7
CC_OL_016_O07	-0.0652232		-0.140325		0.13402		0.179469		0.177501		-0.133272			7
CC_OL_016_O10	-0.0713229		0.0625437		-0.167449		-0.194447	28.1875	-0.0897905		-0.4812	6.39063	12.5609	7
CC_OL_017_A03	0.088134				-0.239879						0.264841	12.1023		7
CC_OL_017_B03	-0.377016	25.8116	-0.0171347		0.255706	33.8404	0.218771		-0.0764046		-0.908726	2.33695	22.1877	7
CC_OL_017_B06	-0.0903191		0.0563478		0.146732	46.9822	0.0326362		0.0938479		-0.479073	2.33695		7
CC_OL_017_C11	-0.0427733		0.0708259		-0.186231	42.2193	-0.222211	42.6069	-0.138327		-0.515701	22.3838	24.012	7
CC_OL_017_E10	0.284524	22.2561	0.298355		-0.0257371		0.0660128		0.319137	46.4921	-0.0501163		22.1877	7
CC_OL_017_E21	-0.0358454		0.0139795		0.037198		-0.0194265		-0.209086	34.569	-0.256445	9.83445	20.8934	7
CC_OL_017_F14														7
CC_OL_017_O20	-0.565728	10.3357	-0.16098	45.1357	0.036062		0.130229		-1.03722	0	-1.60587	2.6814	22.1877	7
CC_OL_017_O21	0.0298295	37.5172	-0.170207		-0.0187859		-0.106871		-0.162345	42.1044	0.251667	18.8282		7
CC_OL_018_A22	-0.105704		-0.177912	40.2379	0.0394973		-0.0461701		-0.157	28.6663	-0.429495	2.6814	29.2653	7
CC_OL_018_B02														7
CC_OL_018_E02	0.158127	25.8116	0.227947		0.0827346		-0.0233704		-0.120153		0.144587	33.2771	38.2545	7
CC_OL_018_E16	-0.378891	15.9625	-0.163485	31.8463	-0.152912		-0.0991156		0.15517	46.4921	0.643497	12.1023	22.1877	7
CC_OL_018_I19	0.241267	25.8116	-0.388962	15.8136	0.0662172		-0.0530369				-0.0277524		24.012	7
CC_OL_018_K06	-0.0306143		-0.0180789		0.0065394		-0.12137		0.091139		-0.0901253	49.9057		7
CC_OL_018_N04											-0.178534			7
CC_OL_018_O05	0.20198	33.7527	-0.113924		0.376717	6.72025	-0.000307805		0.378187	37.6844	0.397932	22.3838	40.0133	7
CC_OL_018_O22	0.0936362	40.8778	0.13943		-0.0797799		0.044483		0.0106756		-0.292116		29.2653	7
CC_OL_019_D01	-0.202611	29.718	-0.170159	26.5964	-0.0420607		-0.0792212		-0.00880468		0.0673235	29.5603	19.7483	7
CC_OL_019_H06	-0.190815	13.6381	-0.0604752		-0.0977897		0.0337088		-0.0580656		0.150744	29.5603	27.6504	7
CC_OL_019_H14	-0.125931		0.0671097		0.119826		-0.0322533		0.143757	46.4921	0.240855	18.8282	38.2545	7
CC_OL_019_J19	0.103361		0.140568		0.286135		0.0166528		0.238491	46.4921	-0.21834			7
CC_OL_019_L15	-0.171199		0.165105		-0.00937683		-0.0925947		-0.352929	24.385	-0.903503	1.35943	2.09221	7
CC_OL_020_C16	-0.0203736		0.0330514		0.0197322		-0.0826186		0.0506382		0.487506	9.83445	24.012	7
CC_OL_020_D11	-0.305554	29.718												7
CC_OL_020_I15	-0.192411	29.718	-0.184371	37.0587	0.0373748		0.0153057		-0.0435603	46.4921	0.236883	15.0033	14.3906	7
CC_OL_021_I09	0.123804	37.5172	-0.139306		-0.103092		-0.019267		-0.0589489		0.200333	15.0033	49.9559	7
CC_OL_021_K21	-0.136733		-0.372886		-0.385523		-0.357506	19.9495	-0.0982836		-0.392471	25.9325	43.4785	7
CC_OL_021_L04	-0.87075	3.78856	-0.362012		0.124005	46.9822	-0.0555847		-0.670792	6.05829	-1.83973	3.22942	18.3434	7
CC_OL_022_A01	-0.77305	19.0265	-0.330616	17.2634	0.0568548		0.0339544		-0.929309	0	-1.48479	2.33695	10.2741	7
CC_OL_022_A19	-0.275184	8.31651			-0.454735		-0.603182	2.99518	-0.409153	17.9191	0.392793	15.0033	48.4602	7
CC_OL_022_C05	-1.07836	1.85743	-0.450905	18.9828	-0.648257	11.0134	-0.552619	19.9495	-0.834726	0.684721	-0.723976	4.14154		7
CC_OL_022_C06	-0.089537		-0.111289		0.110871	46.9822	0.0739473	46.4198	-0.184174		-0.0580949	33.2771		7
CC_OL_022_O03	0.116974		-0.212611	49.244	-0.179384		-0.337066	46.4198	-0.325292	21.4061	-0.504436	12.1023	5.07451	7
CC_OL_023_E12	-0.22693	44.9968	0.101931		0.13499		0.0881436		-0.0848553		0.0716237			7
CC_OL_023_G05	0.0787022		-0.628869	49.244	-0.206076	23.4001	-0.279335	24.6475	0.0576301		0.344657	12.1023	27.6504	7
CC_OL_023_G09	-0.0890694		-0.16	49.244	0.0103105		0.0297115		-0.143026	42.1044	0.200066	22.3838	38.2545	7
CC_OL_024_E04	-0.143905	44.9968	-0.0457327		-0.352124	5.3725	-0.201853	34.9677	-0.102573		0.492264	12.1023	19.7483	7
CC_OL_024_F05	0.0720804								-0.0202443		-0.425219	29.5603		7
CC_OL_024_M06	-0.0641572		0.0396072		0.178441		-0.0130875		-0.389547	17.9191	-0.3086	8.05179	12.5609	7
CC_OL_025_A22	0.0313865	44.9968	-0.118743		0.111166		0.179534		-0.155183	42.1044	-0.95982	3.22942	2.09221	7
CC_OL_025_B07	-0.00865779		-0.177547		-0.158651		-0.00960629		-0.462576	31.2984	-0.381886	9.83445	22.1877	7
CC_OL_025_C11	-0.0474962		0.12796		-0.0368612		-0.0599431		-0.117089	46.4921	0.0217593	49.9057		7
CC_OL_025_F14			0.400225								-0.174218			7
CC_OL_025_I24	0.0302822	40.8778	0.13277		0.181788		0.130411	34.9677	0.0510818		0.128599	37.1539		7
CC_OL_025_J10	-0.105396	37.5172	0.000694141		-0.0160277		-0.126775	26.4536	0.104787	42.1044	-0.0855337			7
CC_OL_025_K15	-0.0216664		-0.105115		0.0468078		0.0198427		-0.0959322		0.722461	12.1023	18.3434	7
CC_OL_025_M23	-0.0745582		-0.0329602		0.138677		0.14261	42.6069	-0.0910642	42.1044	-0.0417466			7
CC_OL_026_A12	0.0556174	44.9968	-0.100883		-0.148563		0.0167938		-0.0559389		0.031588		32.8143	7
CC_OL_026_D06	0.0383053		-0.0428075		-0.0849007		-0.207087	34.9677	-0.138401		-0.0790141			7
CC_OL_026_D14	-0.889385	1.85743	-0.306443		0.184841	42.2193	0.174961	42.6069	0.0353722		-1.04347	9.83445		7
CC_OL_026_D21	0.0593341		-0.214174	49.244	-0.247845	37.2031	0.0393449		0.0324371		-0.0892752	49.9057	36.5087	7
CC_OL_026_F11	-0.00224251		-0.0462794		-0.205718		-0.314725	31.3506	-0.00118305		0.21602	44.0973		7
CC_OL_026_I23	-0.270189	12.0207	-0.0424418		0.0501738		0.0783737		0.0325952		0.103105	44.0973	20.8934	7
CC_OL_026_J02			-1.17854	2.29555	0.348177				1.09011	31.2984	-0.178509	22.3838		7
CC_OL_026_M04	-0.322818	3.78856	-0.0787888		0.0668988		0.156572	34.9677	0.345536	37.6844	0.531373	22.3838	2.84897	7
CC_OL_026_O11	-0.274473		0.0019229		-0.0966761		0.0604053		0.108652	46.4921	0.0901165	44.0973	43.4785	7
CC_OL_026_P20	-0.0383055		-0.136904	49.244	-0.201762		-0.233083	19.9495	0.174827		0.0691169	37.1539	49.9559	7
CC_OL_027_D10	0.221144		0.0216219		0.454515	20.3752	-0.0354049		-0.122115		-0.0979524		32.8143	7
CC_OL_027_G14											0.727893	6.39063		7
CC_OL_027_H06	0.0509735	33.7527	0.134797		0.132633		0.148053		0.0716872		0.154087	33.2771		7
CC_OL_028_A01			-0.522362		-0.029196		-0.227655	19.9495			0.357373			7
CC_OL_028_F10	-0.00710078		-0.00822621		-0.0559232		0.029651		-0.00526576		-0.313709	9.83445	19.7483	7
CC_OL_028_G05	-0.329958	44.9968	-0.0432338		-0.00264748		-0.135711	49.7484	-0.194914	28.6663	0.143198	44.0973	32.8143	7
CC_OL_028_G23	0.095385		-0.215905		-0.174788		0.0670876		-0.37152	26.3119	0.0242436		40.0133	7
CC_OL_028_M01	0.257984	3.78856	0.101178		0.644611	14.9963	1.04682	0	0.923424	24.385	1.67848	0.20657	0	7
CC_OL_029_A16	-0.535805	12.0207	-0.463891	45.1357	-0.0959641		-0.19541		-0.781993	1.56915	-1.18106	0.446637	19.7483	7
CC_OL_029_C21	-0.131199	22.2561	-0.174412	37.0587	0.0169073		0.0812792	49.7484	-0.157282	37.6844	-0.531669	2.33695	31.0409	7
CC_OL_029_L09	-0.766249	0	-0.407769	8.99347	0.4189	8.15431	0.210131	46.4198	-0.128573		-0.498994	8.05179		7
CC_OL_030_B23	0.340531	19.0265	-0.0243004		0.0874771		0.0571654		0.167794		-0.177903	33.2771	22.1877	7
CC_OL_030_C10	-0.0795055		-0.0606074		0.0901459		-0.0507357		-0.11588		-0.893028	0.835227	4.35452	7
CC_OL_030_E18	0.000732226		-0.400058	13.9394	-0.128151		-0.21081	24.6475	-0.0791393		0.0375418	47.0896	36.5087	7
CC_OL_030_I22	0.073282	40.8778	-0.182962		0.0884342		0.193334	38.5493	-0.0823998	46.4921	-0.0911538	40.5623	38.2545	7
CC_OL_030_K04	0.176185	22.2561	-0.0612582		-0.128397	42.2193	-0.266019	24.6475	-0.317283	24.385	-0.767402	0.363199	0.782135	7
CC_OL_030_M06	0.0826022		0.0537657		-0.0526202		-0.172536		-0.559476	5.53818	-0.328206	8.05179	11.557	7
CC_OL_030_O01	-0.43741	19.0265	0.0623481		-0.0638126		0.033216		-0.0233218		0.548896	9.83445	20.8934	7
CC_OL_030_P12	-0.0486008		0.106377		-0.06761		0.0249099		-0.0404125		0.0419036			7
CC_OL_031_G18	0.251549	19.0265	-0.224505	28.7086	-0.214566		-0.35767	28.1875	-0.483422	5.31916	-0.584881	2.33695	2.09221	7
CC_OL_031_H09	-0.0200822		-0.182639		-0.037608		0.119549	38.5493	-0.123118	42.1044	0.24467	29.5603	48.4602	7
CC_OL_031_I02	0.0666014		-0.443201	37.0587	0.0755503		0.115749		-0.030988		0.514397	12.1023	29.2653	7
CC_OL_031_J07	-0.602438	3.31382	0.0158294		-0.0433074		-0.257558	49.7484	-0.158616	46.4921	0.100291	33.2771	31.0409	7
CC_OL_031_J11	0.0438523		-0.0585882		0.215246	42.2193	0.0895618	46.4198	-0.197611	46.4921	-0.206504	22.3838	29.2653	7
CC_OL_031_J15	-0.0632		0.0306332		0.150391		0.0218571		0.340874	42.1044	0.168721		36.5087	7
CC_OL_031_J19	-0.194337		0.0498771		-0.144329		-0.0560194		-0.0252974		-0.0372451			7
CC_OL_031_M14	-0.507826	3.31382	-0.364818	15.8136	-0.185478	33.8404	-0.249846	31.3506	-0.400274	7.15844	0.0173551	49.9057	29.2653	7
CC_OL_031_N04	0.217781	25.8116			-0.184325									7
CC_OL_031_P11	0.159288	19.0265	-0.0240535		0.195321	37.2031	0.0521367		0.110399		0.182844	15.0033		7
CC_OL_032_A07	-0.163584		-0.0913309		0.0355012		-0.0212712		-0.0417407		0.574476	9.83445	27.6504	7
CC_OL_032_B12	-0.116365	22.2561	-0.173008		-0.127005		-0.00435694		-0.00694592		-0.698174	18.8282	43.4785	7
CC_OL_032_E06	-0.106644		-0.301009	37.0587	-0.00911578		0.0300604		0.087328		-0.115027	47.0896		7
CC_OL_032_E22	0.160301	25.8116	0.0507391		0.113338	46.9822	0.001302		0.135092	42.1044	0.175013	44.0973		7
CC_OL_032_H08	0.0284511		0.072971		-0.416275		-0.1025		0.0564666		0.5264	12.1023	27.6504	7
CC_OL_032_J17	0.0819489	25.8116	-0.0654983		0.0695603		0.126369		0.00716553		-0.0952807			7
CC_OL_032_L24	-0.12866		-0.110899		-0.106859		0.0227411		-0.262046	31.2984	-0.478078	8.05179	15.7073	7
CC_OL_032_N03	-0.411567	13.6381	-0.225972	34.5567	-0.357098	11.0134	-0.197961	42.6069	-0.568023	21.4061	0.151993	22.3838	25.8284	7
CC_OL_032_O02					-0.0594384									7
CC_OL_032_O03	-0.229441	19.0265	-0.0381609		0.121629		-0.0133595		-0.0837286		-0.380168	5.33638		7
CC_OL_033_C12	0.470974	1.81354	0.261241		0.164665	29.8948	0.148816	38.5493	0.220212		0.103425	44.0973	10.2741	7
CC_OL_033_E15	0.0618382				0.267874		-0.214728	38.5493						7
CC_OL_033_H01	-0.748058	6.38553	-0.128994		0.292835		0.123709		-0.109264		-0.736463	47.0896	40.0133	7
CC_OL_034_F05	0.0726568	33.7527	-0.145601		0.0260651		0.0932454	49.7484	0.029221		0.537826	12.1023	29.2653	7
CC_OL_034_F23	0.175238	29.718	-0.0141604		-0.376139		-0.100123		-0.240716	42.1044	0.148598	25.9325		7
CC_OL_035_F04	0.0348565		-0.145497		0.032689		-0.114575		-0.136868		0.0500109	37.1539	48.4602	7
CC_OL_001_E04	-0.0055005		-0.123878		-0.149263		-0.0186953		0.704653	34.569	0.625515	12.1023	19.7483	8
CC_OL_001_H02	-0.0279206		-0.145638		-0.0655631		-0.126967	38.5493	-0.356763	16.4559	-0.632777	12.1023	3.97255	8
CC_OL_001_I18	-0.0432684		-0.0388254		0.0315848		0.0128899		-0.410696	5.31916	-0.630635	0	2.09221	8
CC_OL_001_J06	0.009217		-0.154706	49.244	-0.304822	7.65896	-0.317636	8.91472	-0.241044		0.185743			8
CC_OL_001_J09	0.0212963		-0.0794141		0.150138	23.4001	-0.147305	24.6475	0.171502	42.1044	0.576841	15.0033	27.6504	8
CC_OL_001_J16	0.25335	13.6381	-0.0903257		-0.16122		-0.188976	31.3506	0.00985297		0.50229	9.83445	43.4785	8
CC_OL_001_M06	-0.0938111	44.9968	0.108135		0.0211588		-0.121464		-0.160533	31.2984	-0.310261	29.5603	25.8284	8
CC_OL_001_M18	0.295229	12.0207	0.196815		0.253537	26.8456	0.243954	46.4198	0.0498398	42.1044	0.438159	15.0033		8
CC_OL_001_N16	-0.488833	8.31651	-0.0843537		0.175083	33.8404	0.0629762		0.197288	42.1044	1.07917	3.22942	0.619915	8
CC_OL_001_O23	-0.12849	44.9968	-0.155977	34.5567	-0.0931641		-0.0836495		-0.0481938		0.669867	4.14154	7.26894	8
CC_OL_001_P12	-0.38649	19.0265	-0.320259	26.5964	-0.0597808		-0.181977	31.3506	0.0269137		0.722138	9.83445	12.5609	8
CC_OL_002_B11	-0.174696	29.718	-0.10347		0.0504945		-0.00255367		-0.553806	7.15844	-0.17609	40.5623	31.0409	8
CC_OL_002_C08	-0.0814453		-0.058279		-0.0243405		-0.09236		-0.252946	28.6663	-0.0285483		48.4602	8
CC_OL_002_D07	-0.334322	10.3357	-0.135048	49.244	0.407448	29.8948	0.134379		0.0246438		-0.22754	49.9057	46.6954	8
CC_OL_002_J08	-0.251035	10.3357	-0.175531		-0.178989	42.2193	-0.187087		0.186403	42.1044	0.29446	29.5603	8.87849	8
CC_OL_002_M09	0.187494	22.2561	0.00633783		0.14088		-0.0203684		-0.403358	12.7329	0.181596	40.5623	40.0133	8
CC_OL_002_O21	0.307738	4.63086	-0.0293454		-0.184217		-0.396463	22.1072	-0.543232	34.569	0.0482677		24.012	8
CC_OL_003_D01	0.209097	8.31651	-0.0343316		0.196159	29.8948	-0.0578147		0.066873		0.839249	9.83445	24.012	8
CC_OL_003_D05	0.18186	15.9625	0.00649662		0.432981	18.2822	0.0301503		0.171781		-0.253563		46.6954	8
CC_OL_003_G07	0.473496	8.31651	0.163936		-0.272023		-0.119435		0.0654208		0.211564	25.9325		8
CC_OL_003_I07	0.0069912		-0.137121		0.14137	46.9822	-0.101392	49.7484	-0.0409427		0.247623	29.5603		8
CC_OL_003_M17	-0.154166		-0.295475	26.5964	0.0400822		-0.0419595		-0.061799		-0.038982			8
CC_OL_003_P12	-0.600714	0	-0.557637	7.3077	-0.60117	2.38721	-0.310621	3.9376	0.0121344		0.264164	15.0033	0.716051	8
CC_OL_003_P14	0.0699857	48.3647	0.180341		0.0264734		-0.0561418		-0.181645		0.450224	5.33638	48.4602	8
CC_OL_004_A10	-0.159651	37.5172	-0.22366		-0.104059		0.204831		-0.112838		-0.469072	18.8282		8
CC_OL_004_D17	0.0259102		0.139047		-0.126471		-0.0820248	46.4198	-0.188897	37.6844	-0.16155		48.4602	8
CC_OL_004_E23	-0.205953	6.38553	-0.0602222		-0.319288	20.3752	-0.175923	49.7484	-0.462326	6.33755	-0.971111	0.363199	2.09221	8
CC_OL_004_I17	0.102311	40.8778	-0.169612	49.244	-0.217664		-0.206703	46.4198	-0.0264652		0.520947	6.39063	27.6504	8
CC_OL_004_J15	-0.337924		-0.0557468		-0.203193		-0.126591		-0.226179	37.6844	0.291643	15.0033	31.0409	8
CC_OL_004_M08	0.0807999	25.8116	-0.106879		-0.103133		-0.133048	49.7484	-0.36355	34.569	-0.447409	5.33638	0.782135	8
CC_OL_004_N07	-0.185951	22.2561	-0.205573	40.2379			-0.131773	34.9677	0.419179	26.3119	0.487457	12.1023	18.3434	8
CC_OL_005_D01	-0.178702		-0.0628942		0.0234455		0.0750453		0.0758131		-0.628288	18.8282	31.0409	8
CC_OL_005_M22	0.1327		0.198819		-0.00812162		-0.0765148		0.158587	42.1044	0.221396	22.3838		8
CC_OL_005_N06	0.136462	22.2561	0.27243		0.153361		0.176515	46.4198	-0.191392	24.385	-1.0085	0.835227	0.782135	8
CC_OL_005_O02	0.0943452		-0.316163	49.244	-0.011295		-0.0213251		-0.415577	34.569	0.137461			8
CC_OL_005_P13	0.176342	15.9625	0.00922987		-0.148808		-0.0965423		-0.0664917		0.603136	9.83445	29.2653	8
CC_OL_006_A21	-0.352631	1.85743	-0.451854		-0.0750666		-0.205428		-0.412471	21.4061	-0.533801	9.83445	46.6954	8
CC_OL_006_I03	-0.0170327		0.017959		-0.176143	20.3752	-0.171608		0.115772		0.0730748			8
CC_OL_006_M10	-0.305106	4.63086	0.00943969		-0.0938212		-0.0363007		0.154251	42.1044	0.241261	29.5603	17.0611	8
CC_OL_007_A16	0.293372	37.5172	-0.311417	37.0587	-0.117764		-0.260262		-0.184926	37.6844	-0.779212	4.14154	11.557	8
CC_OL_007_C20	0.119508	33.7527	-0.102176		0.152057		0.128159	38.5493	-0.0808104		-0.40157	15.0033	25.8284	8
CC_OL_007_F05	0.0138489	48.3647	0.276105				0.231113		0.612068	34.569	-0.392528	25.9325	25.8284	8
CC_OL_007_F20	0.232684	19.0265	0.153642		0.0146942						0.072454	33.2771		8
CC_OL_007_H23	-0.00299529		-0.282467		-0.411297	26.8456	-0.446158	4.4309	-0.0557331		0.341243	12.1023	25.8284	8
CC_OL_007_K17	0.10538	22.2561	-0.393541	26.5964	0.239489	46.9822	-0.127327		-0.256141	37.6844	-0.242245	49.9057	46.6954	8
CC_OL_008_B01	0.000388025		-0.205811		-0.176323	29.8948	-0.00498543		-0.137241		7.05286e-05			8
CC_OL_008_F19	0.18457		-0.351615	49.244	-0.112481		0.0512915		0.307605	37.6844	0.522077	22.3838	20.8934	8
CC_OL_008_I06	-0.0673769		-0.0157521		-0.0678345		-0.101846	49.7484	-0.0415005		0.134271	49.9057		8
CC_OL_008_J06	0.1439	37.5172	-0.0607944		-0.425842	26.8456	-0.289176	6.78638	-0.436283	26.3119	-0.0359664	49.9057	20.8934	8
CC_OL_009_A10	0.052781	40.8778	0.094725		-0.0178259		-0.0162823		0.229694	42.1044	0.0456196			8
CC_OL_009_C12	0.0727938				0.0927777		-0.0748813		0.17047	46.4921	-0.132193			8
CC_OL_009_F10	-0.0786534		-0.17032	31.8463	0.0506295		-0.0925008		-0.071169		-0.030804			8
CC_OL_009_J17	0.132411	13.6381	0.277917		0.185529	42.2193	-0.0486482		-0.166851	42.1044	-0.467731	2.33695	1.62381	8
CC_OL_009_K14	0.156285	15.9625	-0.506212	18.9828	-0.161884	42.2193	0.062028		0.201823		0.260275	49.9057		8
CC_OL_010_A16	0.0461936	44.9968	0.168654		0.103625		0.0582026		0.0253789		0.0543697	49.9057	49.9559	8
CC_OL_010_A23	0.0289181	37.5172	-0.0357633		0.0528345		0.0194516		0.083397		-0.0238576		29.2653	8
CC_OL_010_C03	-0.184773				-0.109522		-0.396559	34.9677	-0.0119101		0.280851	22.3838	34.526	8
CC_OL_010_D22	-0.0564633		0.137729		0.048675		0.0832365	46.4198	0.0342276		0.238732	22.3838	43.4785	8
CC_OL_010_E13			-0.047707		0.15415		0.091869		0.0495499		-0.86284	15.0033	11.557	8
CC_OL_010_E21	-0.0685755		0.101099		0.025538		-0.0413531		0.0331223		0.328489	15.0033	24.012	8
CC_OL_010_F13	-0.0911525		-0.371472	13.9394	-0.0963893		0.0095206		-0.354822	12.7329	-0.303942	33.2771	45.0807	8
CC_OL_010_N18	-0.0392439		-0.346572	21.9863	-0.0246579		0.0220477		-0.51958	26.3119	0.272835	22.3838	43.4785	8
CC_OL_010_O10	-0.140927	48.3647	-0.393246	13.9394	-0.531118	11.0134	-0.406767	3.9376	-0.605157	8.3482	-0.667153	3.31894	2.84897	8
CC_OL_011_A06	-0.0820889		0.0469785		-0.0938341		-0.397497	31.3506	0.252837	42.1044	0.170137	37.1539	40.0133	8
CC_OL_011_L01	0.287259	13.6381	0.00310903		-0.167467		-0.127161	38.5493	0.202101	37.6844	0.440411	18.8282	32.8143	8
CC_OL_011_N23	0.232463	19.0265	0.0898799		-0.069789		-0.0150217		-0.00766302	46.4921	-0.371349	8.05179	7.26894	8
CC_OL_011_O14	0.0935292	25.8116	-0.0717398		-0.0600614		-0.0933333		-0.256584	37.6844	0.135445	37.1539		8
CC_OL_012_A15	0.505561	2.91035	-0.0121613		-0.15822		-0.0940324		0.149438	42.1044	-0.0448573	47.0896	34.526	8
CC_OL_012_B01	-0.0114885		-0.183918		0.0542677		0.0542677		0.0904385	42.1044	0.68128	9.83445	17.0611	8
CC_OL_012_C23	0.0930851	37.5172	-0.118648		0.247718		0.0808929		0.187143	37.6844	0.165162	33.2771	41.6943	8
CC_OL_012_D08	0.106446	33.7527	-0.157677		0.249985		-0.0896042		0.184332	37.6844	0.0255794	40.5623		8
CC_OL_012_H14	-0.174557	48.3647	0.0420657		0.0803818		0.0862148		0.363017	31.2984	0.503687	44.0973	22.1877	8
CC_OL_012_K05	-0.438141	10.3357	-0.257571		-0.153521		-0.352544		-0.463703	24.385	-0.589298	44.0973		8
CC_OL_012_N05	-0.270112	5.5422	-0.303641		-0.216446		-0.289051	12.4531	-0.398937	8.3482	-0.223086	18.8282		8
CC_OL_012_P04	0.46306	12.0207	0.113727		-0.296719	14.9963	-0.12102		-0.373328	16.4559	-0.265828	33.2771	6.34878	8
CC_OL_013_A23	-0.180795	40.8778	0.105252		0.0921762		0.169868	38.5493	0.187309		-0.270669	12.1023		8
CC_OL_013_B23	0.494819	0.959265	0.203462		-0.0639051		-0.0403139		0.0401975		-0.12298	37.1539	8.87849	8
CC_OL_013_B24	-0.0220903		0.0353297		0.0191366				-0.30253	12.7329	-0.0293608	22.3838	7.26894	8
CC_OL_013_C19	0.0491086	44.9968	-0.487221	49.244	-0.491007	0	-0.459341	19.9495	0.144528		0.559859	9.83445	32.8143	8
CC_OL_013_H14	-0.208794	8.31651	-0.21224	45.1357	-0.061621		-0.136301	26.4536	0.0568574		0.309596	6.39063	14.3906	8
CC_OL_013_L17	-0.114358	44.9968	-0.187905	37.0587	0.00409916	46.9822	0.0381826		0.0926552	46.4921	-0.0182069		27.6504	8
CC_OL_013_L19	0.458422	2.32496	-0.0320037		-0.108115		-0.0794733		-0.0566627		-0.401063	3.31894	7.26894	8
CC_OL_014_D20	-0.529923	7.17452	-0.15943	37.0587	0.251131		-0.0158596		-0.252879	21.4061	-2.68262	0	11.557	8
CC_OL_014_D21	-0.0973772		0.02806		-0.392289	6.03974	-0.0961066		0.111128		0.397846	12.1023	22.1877	8
CC_OL_014_G03	0.0630388		-0.0460501		-0.0440991		-0.159041		-0.012948		0.0271909	47.0896		8
CC_OL_014_H19	-0.0874465		-0.00346385		-0.0419491		-0.123541		0.0488726		0.399682	12.1023	24.012	8
CC_OL_014_H21	0.0125096		0.0644557		-0.0855514		-0.10301		0.0342292		-0.162713	25.9325	27.6504	8
CC_OL_014_K09	-0.0804061		0.0446321		-0.159159		0.024248		0.206037	37.6844	0.134147	44.0973	31.0409	8
CC_OL_014_K14	-0.0787837		0.079256		0.0377264		0.0165647		-0.00199834		-0.448636	12.1023	10.2741	8
CC_OL_014_L21	0.0888088		-0.119018		0.0766735		-0.19929	31.3506	0.148884		0.235222	47.0896		8
CC_OL_014_M04	0.0772971		0.012358		-0.292239		-0.0428735		-0.061284		-0.625715	2.33695	12.5609	8
CC_OL_015_B07	-0.17861		0.282405		-0.163488	33.8404	-0.242042	24.6475	-0.144389	37.6844	-0.559087	1.35943	1.62381	8
CC_OL_015_D04	-0.19216	25.8116	-0.121636		-0.307808	37.2031	0.0068264		-0.372925	34.569	-0.429383	37.1539	45.0807	8
CC_OL_015_D22	0.120291		0.234392		0.127586	46.9822	0.0795755		-0.412867	8.3482	-1.4995	0	0.760804	8
CC_OL_015_M10	0.161831	29.718	0.0130752		-0.00419529		-0.0324872		0.196776	42.1044	-0.315537	47.0896	36.5087	8
CC_OL_015_N04	-0.101905		-0.238971		0.0507722		-0.119589		-0.302231	19.8042	-0.354683	6.39063	20.8934	8
CC_OL_016_A02	0.203497	19.0265	-0.205261		-0.0739399		-0.0308549		0.0153856		0.0250448	49.9057		8
CC_OL_016_F03	0.0849271		-0.000501529		-0.00461017		-0.0544715		-0.150177		-0.137866		38.2545	8
CC_OL_016_G17	-0.101807		-0.0708894		0.101483		-0.00787164		-0.0304197		0.198981		49.9559	8
CC_OL_016_G18	-0.446281				-0.11823		-0.265295	38.5493	-0.0976046	37.6844	-1.19306	2.33695	10.2741	8
CC_OL_016_L24	-0.0636958													8
CC_OL_016_P06	-0.0311024		0.193064				-0.252044	42.6069	0.315871		0.382574	6.39063	27.6504	8
CC_OL_017_B22	0.0795701	48.3647	0.0276326		-0.0613683		-0.184967	42.6069	0.167591	42.1044	0.507885	9.83445	27.6504	8
CC_OL_017_D11	-0.0746007		-0.0605015		0.0420201		-0.0788624		0.00102051		0.112339	29.5603	40.0133	8
CC_OL_017_G24	-0.0792681		-0.15491	40.2379	0.0645575		0.0302697		-0.127338	37.6844	-0.42832	9.83445	18.3434	8
CC_OL_017_M02	0.411892	22.2561	0.646225		0.0154502		0.0124291		0.283935	37.6844	0.610042	6.39063	38.2545	8
CC_OL_017_O14	0.418459	2.91035	0.392062		0.204069	37.2031	0.143663		0.211083		-0.648198	1.35943	0.760804	8
CC_OL_018_A05	0.431494	7.17452	-0.559722	40.2379	-0.00824063		-0.102705		-0.185559		-0.049392		31.0409	8
CC_OL_018_C13	0.203784	22.2561	0.11021		-0.023669		-0.0596149		0.479835	7.15844	0.668114	0.756071	18.3434	8
CC_OL_018_F24	0.188618	22.2561	0.123513		-0.0756174		-0.204769	28.1875	-0.0272233		0.155821	33.2771		8
CC_OL_018_K18	0.0299053		-0.0175295		-0.0114365		0.0578375		-0.158696	37.6844	-0.172491	47.0896	49.9559	8
CC_OL_018_N17	-0.670743	5.5422	-0.191464		-0.490684	6.03974	-0.332182	22.1072	-0.316137	34.569	-0.0614338	47.0896	34.526	8
CC_OL_018_O07	-0.12606				-0.021155		0.138269		0.390332	42.1044	-0.512113	12.1023		8
CC_OL_018_P04	-0.228854	25.8116	-0.184217		-0.0393581		0.0223697		-0.118665		-0.408875	15.0033	29.2653	8
CC_OL_019_F07	0.08499		0.0615224		0.159891	29.8948	0.138626		-0.769498	1.3948	-0.665697	2.33695	0.782135	8
CC_OL_019_F23	-0.230317	10.3357	-0.26974	31.8463	-0.0446193		-0.0414005		-0.0175439		-0.468241	1.68706		8
CC_OL_019_H22	0.0244504		0.243267		0.0239598		0.00751197		-0.0648925		-0.321131	22.3838	18.3434	8
CC_OL_019_K03	-0.126779	48.3647	-0.0141962		-0.119785		-0.10107		-0.00511349		-0.24511	33.2771	49.9559	8
CC_OL_019_K08	0.0326566		0.165978		-0.123966		-0.0798045		0.0577468		-0.0832556			8
CC_OL_020_B01	-0.26775	8.31651	0.214575		0.240467	46.9822	-0.152331	31.3506	-0.17893	37.6844	-0.288845	18.8282	31.0409	8
CC_OL_020_E14	-0.153773	12.0207	-0.235095	31.8463	-0.210749	33.8404	0.0461025		-0.250824	24.385	-0.314015	22.3838		8
CC_OL_020_J14														8
CC_OL_020_J22	-0.098085		-0.365392	13.9394	-0.280285		-0.172855	42.6069	-0.23827	19.8042	-0.298835	22.3838		8
CC_OL_020_M17	-0.186583	13.6381	-0.0891182		-0.180234		-0.162303	38.5493	0.0433071		0.87167	12.1023	15.7073	8
CC_OL_020_N21	-0.152854	8.31651			0.0917915		0.0568392		0.132777		-0.285431	15.0033		8
CC_OL_021_B06	0.0199849		-0.195277		-0.0577168		0.180078		0.288347		0.131667	22.3838	29.2653	8
CC_OL_021_D01	0.15256	13.6381	-0.0695223		0.0106278		-0.0653259		0.00929605		0.0323083			8
CC_OL_021_G20	0.0511628	33.7527	-0.0480463		0.0139487		-0.00935413		-0.050143		-0.284508	15.0033	11.557	8
CC_OL_021_J04	-0.034041	48.3647	-0.249024	40.2379	0.230716	29.8948	-0.0857043		-0.142544		0.22859	25.9325		8
CC_OL_021_J10	-0.0485425		-0.0289916		0.207352	46.9822	-0.0772733		0.493392	42.1044	0.294049	15.0033	22.1877	8
CC_OL_021_M09	-0.084342		0.0899571		0.0413426		0.0801356		-0.235026	14.9433	-0.105642		45.0807	8
CC_OL_021_O20	-0.163643	29.718	-0.0655586		-0.0293539		-0.147187		-0.127865		0.0580884	47.0896		8
CC_OL_022_B08	0.108692	48.3647	0.139723		0.0943459		-0.00820767		0.107375		0.0121633		32.8143	8
CC_OL_022_C23	-0.0289449		-0.158547		0.0245818		0.0579492		-0.363967	26.3119	-0.431352	18.8282	11.557	8
CC_OL_022_D05	-0.445768	33.7527	-0.0403679		-0.0918856		-0.2003	24.6475	-0.033519		0.649465	18.8282	20.8934	8
CC_OL_022_F01	0.213178	29.718	-0.301063	49.244	-0.0492914		-0.110289		0.0543452		0.299723	15.0033	29.2653	8
CC_OL_022_G21	-0.122973	19.0265	-0.20093	34.5567	0.0587514		-0.104667		0.0565634		0.371495	44.0973	24.012	8
CC_OL_022_H02	-0.189934	12.0207	-0.0434312		-0.0840084		-0.095268		-0.177987	42.1044	0.202652	18.8282	32.8143	8
CC_OL_022_M08	0.177355	44.9968	-0.104929		-0.0337387		-0.343998	46.4198	-0.820814	1.3948	-1.61364	0.363199	0.760804	8
CC_OL_022_M24	0.0774547	44.9968	-0.100357		-0.0191171		0.0473345		-0.197618	37.6844	-0.578446	2.33695	6.34878	8
CC_OL_022_O04	0.139079		0.203375		0.0329564		0.126622	49.7484	-0.209486		0.0138119		43.4785	8
CC_OL_022_O07	-0.249669	48.3647	-0.125343		-0.30779	6.03974	-0.0648197		-0.197425	42.1044	0.0135309		46.6954	8
CC_OL_023_C15	0.0404557	44.9968	-0.051908		0.0475903		-0.0407314		-0.501636	16.4559	-0.695854	8.05179	2.56407	8
CC_OL_023_G03	-0.143791	48.3647	0.0884797		0.368097	13.5015	0.31518	12.4531	0.67155	26.3119	0.673605	9.83445	2.84897	8
CC_OL_023_L09	0.0219744		-0.0625776		0.00168437		0.127822	49.7484	-0.152833	28.6663	-0.54812	1.35943	8.87849	8
CC_OL_023_M13	-0.991529	40.8778			0.101662		0.0875641	46.4198	0.220863	46.4921	0.871289	9.83445	7.26894	8
CC_OL_023_N15			-0.0715285											8
CC_OL_024_A06	0.0109424	48.3647	0.0657577		-0.070946		0.0723132		0.0953226		-0.286214	25.9325	24.012	8
CC_OL_024_B11	-0.264368	40.8778	-0.0263998		-0.0783833		-0.124668		-0.243566	34.569	-0.33373	22.3838	31.0409	8
CC_OL_024_D12	0.000575697		-0.418242		-0.179457		-0.0240822		0.458357	24.385	1.0517	3.22942	3.97255	8
CC_OL_024_G03	0.583706	4.63086	-0.040275		-0.00719874		-0.0595047		0.042164		0.371019	12.1023		8
CC_OL_025_E12	-0.00318189		-0.192911	31.8463	0.0594334		0.0432412		-0.644307	5.53818	-1.09769	0.363199	1.65311	8
CC_OL_025_J01	0.0210981		-0.158385		-0.0121768		0.0897238		-0.0625947		0.446197	25.9325	32.8143	8
CC_OL_025_P15	-0.0370519		-0.23597	31.8463	0.198318	37.2031	-0.017528		-0.29042	21.4061	-1.01337	0	4.35452	8
CC_OL_025_P24	0.314777	29.718	0.12931		0.0370969		0.182856		0.023852		0.339256	18.8282	38.2545	8
CC_OL_026_A18	0.155944	22.2561	-0.120095		-0.0146388		-0.0604776		-0.23026	28.6663	-0.616118	0.835227	2.09221	8
CC_OL_026_H08	-0.0486682		0.00611296		0.00750736		0.00354969		-0.057441		-0.895531	9.83445	12.5609	8
CC_OL_026_I21	0.0978279	37.5172	-0.0684407		-0.278681	46.9822	0.0269096		0.0293277		-0.540278	9.83445	17.0611	8
CC_OL_026_L05														8
CC_OL_026_L11	-0.061903		-0.298717	18.9828	-0.335064	33.8404	-0.592973	2.99518	-0.434989	28.6663	0.0445572	33.2771		8
CC_OL_026_N09	-0.0619655		0.0712071		0.101701		-0.0645672		-0.111436	37.6844	-0.188325	37.1539	25.8284	8
CC_OL_026_N17	0.123938	33.7527	0.0863398		-0.0990886		-0.209294	46.4198	0.159938	46.4921	-0.182527	49.9057	41.6943	8
CC_OL_027_A14	1.18346	7.17452	0.995469	7.3077	0.404872	33.8404	0.213906	46.4198	0.139711	46.4921	0.716967	5.33638	31.0409	8
CC_OL_027_B05	-0.0777201	48.3647	0.048593		0.107324		0.00684137		-0.651878	6.05829	-0.913415	1.68706	4.35452	8
CC_OL_027_F04	-0.133575		-0.341176		0.109026		-0.0128563		-0.173923	46.4921	-1.13944	1.35943	10.2741	8
CC_OL_027_F06	-0.179933		-0.18304		0.128281		0.126517		-0.300298		-0.0645377			8
CC_OL_027_J09	-0.350159	15.9625	-0.411883	18.9828	0.139601		0.0474623		-0.132295		0.186033	37.1539	29.2653	8
CC_OL_027_M13	0.0458682	22.2561	-0.163147		-0.113319		0.20985	46.4198	0.025118		0.362983	15.0033	31.0409	8
CC_OL_027_N06	-0.025219		-0.0613279		-0.00824548		-0.0440909		0.00799428		-0.0509165	22.3838	34.526	8
CC_OL_027_N16														8
CC_OL_028_C06	-0.268526	2.91035	-0.244002	49.244	-0.265441	11.0134	-0.0109272		-0.211768	24.385	0.100544			8
CC_OL_028_D05	-0.175096	8.31651	0.194539		-0.272971	9.15258	-0.362443	28.1875	0.523148	37.6844	0.996416	4.14154	19.7483	8
CC_OL_028_E16	-0.364353	12.0207	-0.767259	2.29555	-0.250237	18.2822	-0.285197	15.5702	-0.710096	5.31916	-0.399629	25.9325	45.0807	8
CC_OL_028_I21	-0.00195146	48.3647	-0.00917437		-0.266588		-0.0845052		-0.106111		-0.530655	3.22942	14.3906	8
CC_OL_029_A06	0.0375628		0.0419009		0.0387226		0.0990897	42.6069	0.122473		-0.205468	29.5603	27.6504	8
CC_OL_029_C20	0.150493	19.0265	-0.14176		-0.046082		-0.044211		0.360901	46.4921	0.0606864	37.1539		8
CC_OL_029_O14	-0.381704	8.31651	-0.00607864		-0.0786008		-0.0106178		0.399698	34.569	0.680098	6.39063	6.34878	8
CC_OL_030_A13			-0.242966		0.223482	23.4001	0.159248		-0.284623	17.9191	-0.387921	37.1539	29.2653	8
CC_OL_030_C08	0.0533365	33.7527	0.248665		-0.0534544		0.100461		0.140996		0.211857	22.3838		8
CC_OL_030_F21	-0.110253		-0.140333	45.1357	-0.166038		0.138866		-0.231769	42.1044	-0.0341858			8
CC_OL_030_J12	0.244145	3.78856	0.0128557		0.085249		-0.0481683		-0.0724665		0.0805582		22.1877	8
CC_OL_030_J13	0.163086	44.9968	-0.142371		0.0467211		0.225183	31.3506	0.286999	46.4921	0.384938	8.05179	27.6504	8
CC_OL_030_N14			0.00169679		0.00784492				0.564208	42.1044	0.746767	9.83445		8
CC_OL_031_A20	-0.127443		0.141208		0.228847	23.4001	0.260622	34.9677	-0.0644688		-0.138128	33.2771	24.012	8
CC_OL_031_B15	-0.104494	48.3647	-0.191634	45.1357	0.0315934		0.0865533	49.7484	-0.12461	46.4921	-0.2398	37.1539		8
CC_OL_031_E12	0.060732	29.718	0.0536582		-0.0811981		0.00945081		0.195533	42.1044	-0.408437	22.3838	29.2653	8
CC_OL_031_H01	-0.359291	40.8778	-0.129737		0.240736	37.2031	0.147344	49.7484	0.315047	37.6844	1.14173	12.1023	11.557	8
CC_OL_031_O22	-0.0461897		-0.184719	45.1357	-0.0120873		-0.0219585		-0.225271	24.385	-0.257118	22.3838	10.2741	8
CC_OL_031_P14	0.277599	40.8778	-0.220115		-0.0124321		-0.0193558		0.0197842		-0.0905269			8
CC_OL_032_C23	0.298515	2.91035	0.0518308		-0.100284		-0.065447		-0.22369	31.2984	-0.193228	37.1539	3.97255	8
CC_OL_032_D13	0.2778	10.3357	-0.146577		-0.0895808		-0.165209	49.7484	0.140053		0.381004	15.0033	48.4602	8
CC_OL_032_D23	0.44085	5.5422	0.129955		0.0069373		0.0179886		-0.0575557		-0.0285187		5.93671	8
CC_OL_032_I14	0.124041		0.335092		0.108573		0.229197	34.9677						8
CC_OL_032_J12	0.130374	15.9625	-0.159262		0.0293225		-0.0115697		-0.197337		-0.947202	0	1.62381	8
CC_OL_032_L20	0.139101	25.8116	-0.137526		-0.157344		0.0199221		0.206268		0.554354	18.8282	49.9559	8
CC_OL_032_N11	-0.0436867		-0.0970497		-0.0220376		-0.135578		0.273682	37.6844	-0.0165305			8
CC_OL_032_O14	-0.328433	10.3357	-0.206466		-0.0445773		-0.144184	46.4198	-0.141962		0.529148	9.83445	19.7483	8
CC_OL_033_A14	-0.493815	3.31382			-0.0383091									8
CC_OL_033_G14	-0.198577	44.9968	-0.153911		0.0881197		0.00327727		0.0514928		0.0129777		36.5087	8
CC_OL_033_K12	0.0388245	37.5172	0.0418586		-0.119039		-0.228768	19.9495	-0.197124	31.2984	-0.347526	5.33638	2.84897	8
CC_OL_033_K24	-0.108691		-0.200233		0.0414035		-0.0516004		-0.176523	26.3119	0.486762	15.0033	34.526	8
CC_OL_033_L10	0.118603	22.2561	0.147704		0.00395287		0.0586709		-0.026264		-0.102671	49.9057	10.2741	8
CC_OL_033_L21	-0.0413708		-0.0539818		-0.769278	11.0134	-0.312909	22.1072	0.345729	37.6844	0.408411	9.83445	36.5087	8
CC_OL_033_O08	0.169483	10.3357	0.0731763		-0.301514		-0.00693987		-0.142575	46.4921	0.234491		43.4785	8
CC_OL_034_C18	-0.190361	29.718	-0.0938967		0.0863782		0.0413897		-0.196966		-0.26241	18.8282	45.0807	8
CC_OL_034_E13			0.289919		0.107253		0.209081				-0.695784	29.5603		8
CC_OL_034_E22	-0.300895	12.0207	-0.165425		0.169941		-0.141628		0.102427		-0.138844			8
CC_OL_034_H13	0.0448635		-0.0276448		0.0941921		0.0525467		-0.216123	37.6844	-1.35967	0	3.38315	8
CC_OL_034_H17	0.277179	7.17452	0.0404029		0.0824838	46.9822	0.0385668		-0.52118	6.05829	-0.362429	12.1023	0.760804	8
CC_OL_034_H20	-0.0701779		-0.276455	34.5567	0.409557	33.8404	0.0734344		0.125121		0.141298	33.2771	34.526	8
CC_OL_034_I04														8
CC_OL_034_N04	0.219448	7.17452	0.0730723		-0.091886		-0.0279375		0.147165		0.681811	5.33638	31.0409	8
CC_OL_035_B09	-0.246597	6.38553	0.0578686		0.198966		-0.0463929		0.453358	28.6663	0.567365	8.05179	27.6504	8
CC_OL_035_I15	0.247947	40.8778	0.0648091		0.0890743		0.0459386		-0.132221		-0.580097	33.2771	25.8284	8
CC_OL_035_J05	-0.211946	29.718	-0.188934	34.5567	0.0286847		-0.0238756		-0.182297		0.0844914	47.0896		8
CC_OL_035_K20	-0.131927		0.028645		-0.0600834		0.0365424		-0.133806	34.569	0.134643	33.2771	49.9559	8
CC_OL_035_N02														8
CC_OL_001_B12	-0.576177	10.3357	0.0164633		0.325486	13.5015	0.114903	38.5493	0.106755		-0.0726535		31.0409	9
CC_OL_001_J08	0.0527395	40.8778	-0.102211		-0.00702872		-0.207098	31.3506	0.00135596		-0.237822		49.9559	9
CC_OL_001_K20	-0.141312	48.3647	-0.0440963		0.1097		0.0237746		0.0916993		0.290256	25.9325	31.0409	9
CC_OL_001_O18	-0.0268649		0.112878		0.0852974		0.0242107		-0.200937	46.4921	0.158471	33.2771		9
CC_OL_002_H18	-0.100247		-0.197937		-0.0169814		-0.142046		0.268733	46.4921	-0.836706	0.835227	22.1877	9
CC_OL_002_M02	0.378881	19.0265	-0.293235		-0.234013		-0.134104		-0.317392	9.79633	-0.44826		18.3434	9
CC_OL_003_F07	-0.0582258		-0.0404477		-0.126066		-0.0574068		-0.0536604		0.366221	40.5623		9
CC_OL_003_F24	0.169903	15.9625	-0.0454644		0.045649		-0.0721696		0.0731912		-0.316988	29.5603	24.012	9
CC_OL_003_G04	-0.2065	29.718			0.395606	18.2822	0.250956	26.4536	0.235189		-2.25309	0	6.34878	9
CC_OL_003_H14	0.497396	3.78856			-0.340483	20.3752	0.029744		0.0709767	28.6663				9
CC_OL_004_A17	-0.376246	13.6381	-0.370074	28.7086	-0.527831	2.38721	-0.440701	3.9376	0.128903		-0.180978	22.3838	41.6943	9
CC_OL_004_D24	0.285904	19.0265	0.313434		-0.135011		0.187417	42.6069	-0.116886	37.6844	-0.369624	47.0896	14.3906	9
CC_OL_004_E04	-0.0489391		0.0447842		-0.157248		0.181874	42.6069	-0.0973745		0.088728	44.0973	45.0807	9
CC_OL_004_K01	-0.164234		0.209231		-0.236193	37.2031	-0.201688	38.5493	0.225026		1.25741	5.33638	14.3906	9
CC_OL_004_M17	-0.000946237		-0.672527	5.70962	-0.0651862		0.239308	42.6069	-2.03523	1.23474	-3.83102	0	0.760804	9
CC_OL_005_G06	-0.0360894		-0.0945901		0.305831	23.4001	0.00211244		0.00357441		-0.163609		32.8143	9
CC_OL_005_H18	0.384718	15.9625	-0.174797	26.5964	0.118335		0.175003	49.7484	-1.14332	0	-2.6517	0	0.760804	9
CC_OL_005_J20	-0.103174		-0.0383469		0.0279751		-0.129416		-0.215859		-0.333981	12.1023	46.6954	9
CC_OL_005_L09	0.02765		-0.0743238		0.0536676		0.0104117		-0.00990868		-0.457685	12.1023	10.2741	9
CC_OL_005_O06	0.559336	10.3357	0.912994		0.895908	8.15431	0.154658	34.9677	0.118725		0.190212	22.3838	15.7073	9
CC_OL_006_A19	0.020533		0.013041		-0.0740503		-0.0656326		-0.153666	37.6844	-0.154851	29.5603	17.0611	9
CC_OL_006_D15	0.229803	25.8116	0.474601		0.4039	20.3752	0.307244	19.9495	0.0627294		-0.438924	1.35943	8.87849	9
CC_OL_006_O05	0.0480286		-0.358645		-0.0702904		-0.0948356		0.20024		0.160626	37.1539	32.8143	9
CC_OL_007_A12	-0.437535	13.6381	0.117706		0.181808		-0.0497265		-0.175564	34.569	-0.46362	8.05179	36.5087	9
CC_OL_007_B21	-0.396236	13.6381	-0.0406637		0.288282	14.9963	0.125917	49.7484	0.17289	34.569	0.258281	18.8282	12.5609	9
CC_OL_007_C06	0.541341	7.17452	0.409697	49.244	-0.00824907		0.120778		0.182998	42.1044	0.00932875	33.2771	32.8143	9
CC_OL_007_D09	-0.078033		-0.164409	49.244	0.134831	37.2031	-0.0493192		0.198261		0.491112	6.39063	20.8934	9
CC_OL_007_E10	0.0316861		0.0233633		-0.0875038		0.064664		-1.58634	0	-2.74743	0	0.760804	9
CC_OL_007_L15	-1.29104	1.84902	-1.75263	0	-0.904338	14.9963	-0.997608	0	-0.596815	8.3482	0.328906	40.5623	10.2741	9
CC_OL_007_N22	0.197415	22.2561	0.0578384		-0.0568991		0.00753297		-0.105829	31.2984	0.782304	6.39063	38.2545	9
CC_OL_008_E03	0.0360949		0.185238		-0.137669		-0.124197		-0.061928		0.534405	6.39063	24.012	9
CC_OL_008_F02	-0.131414				-0.271896	37.2031	0.18207	38.5493			0.986658	12.1023	14.3906	9
CC_OL_009_C08	0.00584429		0.198743		0.220963	42.2193	0.199425	28.1875	-0.306842	46.4921	-1.23882	0.363199	2.56407	9
CC_OL_009_N08	-0.350699	10.3357	0.145066		-0.127468		0.128171		-0.418554	17.9191	-0.00522132			9
CC_OL_009_P02	0.242754	12.0207	0.340177		0.286246	16.7058	0.204319		-0.619029	6.33755	-1.16949	0	0.760804	9
CC_OL_010_A05	0.569778		0.851953	21.9863	0.39231	33.8404	0.539101	12.4531	0.214698		-1.40304	0.363199	3.97255	9
CC_OL_010_B03	0.183697	12.0207	0.20668		-0.055872		-0.17322	31.3506	0.0135663		0.0512872		31.0409	9
CC_OL_010_H17	0.0273193	48.3647	-0.0431843		-0.0920154		0.0287078		-0.123681	34.569	-0.117092	49.9057	40.0133	9
CC_OL_010_I01	0.135803		-0.134987		-0.000512957		0.0327444		-1.5657	0	-2.68152	0	0	9
CC_OL_010_L17	0.0493319		-0.0250086		-0.00283089		-0.0760975		-0.247326	46.4921	-1.26184	1.68706	2.84897	9
CC_OL_011_C21	0.0763397	44.9968	0.0511312		-0.025509		0.0821618		-0.509895	31.2984	-2.46511	0.541822	1.62381	9
CC_OL_011_E10	-0.0322188		0.193893		0.190056	26.8456	0.0683251		0.137507	42.1044	0.370262	22.3838	29.2653	9
CC_OL_011_F22	0.276429	12.0207	-0.0258822		0.0241		-0.0283814		-0.126449	37.6844	-0.794757	0	0.760804	9
CC_OL_011_L07	0.0992949	37.5172	0.170363		-0.101553		-0.0548122		-0.00200157		0.229925	22.3838		9
CC_OL_012_A07	-0.0268652		0.190595		0.310209		-0.0902044		0.444856	37.6844	0.0644947	40.5623		9
CC_OL_012_C20	0.12809		-0.141983		-0.065609		-0.238267	24.6475	0.157665	46.4921	-0.739882	4.14154	19.7483	9
CC_OL_012_D06	-0.0983743		-0.161909		0.0373931		0.0968409		-0.448831	17.9191	-2.78644	0.363199	1.62381	9
CC_OL_012_F10	-0.174701		0.0261874		-0.0183245		-0.0451571		-0.0235002		0.888166	8.05179	18.3434	9
CC_OL_012_M19	-0.0732554		-0.00879348		0.0617031		-0.216065	19.9495	0.120601		0.117111	37.1539	43.4785	9
CC_OL_012_N01	0.140109	25.8116	0.0253867		0.087934		-0.10142		0.110248	42.1044	0.587638	37.1539		9
CC_OL_012_P01	0.311358	33.7527	0.0965364		0.410468	29.8948	0.284034	26.4536	-0.0594006		0.769225	8.05179	29.2653	9
CC_OL_012_P22	-0.115004	33.7527	-0.006114		0.0592191		-0.0769017		-0.487136	7.15844	-1.38769	2.6814	2.56407	9
CC_OL_013_J04	-0.163164				-0.277207		0.17025		-0.639723	17.9191	-2.60814	0.363199	2.09221	9
CC_OL_014_G24	0.188901	19.0265	-0.0157337		0.0659838		0.0221074		-0.222134	34.569	-1.55088	0	0.760804	9
CC_OL_014_I03	0.136511	25.8116	-0.0508294		-0.136567		-0.169312		-0.201955	31.2984	-0.333903		22.1877	9
CC_OL_014_I04	-0.0500018		-0.0523936		0.143445		-0.0929764		0.0904109		0.065616	44.0973		9
CC_OL_014_I06	0.111589	37.5172	-0.102307		-0.13692		-0.116954		0.0345035		0.0881826	37.1539		9
CC_OL_014_M01	0.184264		0.0925994		0.239327		-0.147557	26.4536	0.186728		0.0301882		41.6943	9
CC_OL_014_M05	-0.0316723	44.9968	0.0391622		0.0698864		0.0187157		0.450123	34.569	0.327466	18.8282	27.6504	9
CC_OL_014_M20	0.0190082		-0.148729	49.244	-0.191554		0.0490493		-0.45445	9.79633	-0.0921418			9
CC_OL_015_A08	0.263264	12.0207	-0.0987844		-0.0456084		0.0492248		0.0882345		0.0544531			9
CC_OL_015_B06	-0.137069		-0.346066				-0.247152	49.7484	0.216584		-1.12725	1.68706	8.87849	9
CC_OL_015_D05	0.0547234	40.8778	-0.243972	37.0587	-0.115436		0.0394338		-0.0296774		0.0207209	40.5623	49.9559	9
CC_OL_015_F07	-0.0352768		0.0884504		0.107124	46.9822	0.0593457		-0.0404739		0.0129106		49.9559	9
CC_OL_015_I06	0.118311	44.9968	-0.0899769		-0.012138		-0.056102	49.7484	-0.429768	5.53818	-1.71038	0	0.760804	9
CC_OL_015_O16	0.0462423	48.3647	-0.0522178		-0.131169		0.148083		-0.177292	37.6844	-0.527514	3.22942	11.557	9
CC_OL_016_I02	0.336284	19.0265	0.284544		0.306391	20.3752	0.292814	28.1875	0.484626	26.3119	-0.0201328	47.0896	19.7483	9
CC_OL_016_J03	0.117184		-0.154887		0.518849	16.7058	0.569799	24.6475	0.434082	42.1044	1.15079	4.14154	11.557	9
CC_OL_016_K09	-0.134935	48.3647	-0.0624433		0.226372	23.4001	0.0794975		0.044915		0.466951	18.8282	19.7483	9
CC_OL_016_L23	0.0215863	44.9968	-0.105407		0.359233	26.8456	0.0492133		0.0625007	46.4921	-0.02699			9
CC_OL_017_C02	0.0971854		0.137063		-0.229608		0.135099	46.4198	-0.375867	16.4559	-1.19711	0.835227	2.09221	9
CC_OL_017_C18	0.229638	12.0207	-0.00252846		0.110948		0.0279455		-0.32647	21.4061	-0.153254	44.0973	10.2741	9
CC_OL_017_F11	-0.0277877		-0.198847		-0.202636	13.5015	-0.147567	38.5493	0.2017	37.6844	0.273351	9.83445	25.8284	9
CC_OL_017_F20	0.0721584	25.8116	-0.00610329		-0.0193408		-0.00822093		0.0151983		0.114333	37.1539		9
CC_OL_017_P18	-0.124512		-0.150559		-0.031361		-0.112445		0.0508099		0.747545	12.1023	24.012	9
CC_OL_018_A04	0.0168759	40.8778	-0.37921	18.9828	-0.0451368		0.0733069		-0.788086	1.3948	-0.968901	1.07563	4.35452	9
CC_OL_018_M10	-0.0847664		0.0368382		0.327614	33.8404	0.0974848	46.4198	0.305109	37.6844	0.265413	15.0033	20.8934	9
CC_OL_018_N07	0.0229225		0.0436319		0.24008	46.9822	0.0760077		-0.294403	17.9191	-0.158348	29.5603	34.526	9
CC_OL_018_O08	0.22885	13.6381	0.337869		0.0729367		0.0945362		0.0679472		0.0178342		25.8284	9
CC_OL_019_B06	0.0332172	37.5172	0.116039		0.147235		-0.126321	38.5493	-0.00701604		0.598954	6.39063	41.6943	9
CC_OL_020_D21	-0.27624	19.0265	-0.00790132		0.278012	29.8948	0.17201	34.9677	-0.123309		-0.952135	37.1539	46.6954	9
CC_OL_020_D22	-0.571022	8.31651	-0.679788	0	-0.304768		-0.0898652		0.169001	37.6844	-1.31159	0		9
CC_OL_020_G15	-0.0573399		-0.15377		-0.00717616		0.0330931		-0.203364	46.4921	-0.588437	5.33638	19.7483	9
CC_OL_021_C08	0.111743	33.7527	-0.0711946		-0.0267978		-0.0743013		0.178643		-0.360869	22.3838	25.8284	9
CC_OL_021_E10	-0.229802	37.5172	0.0206424		-0.0316391		-0.0318706		0.237838	42.1044	0.778867	9.83445	7.26894	9
CC_OL_021_F03	-0.0801461		-0.510889	24.3011	-0.0696968		-0.0432103		-0.114532	42.1044	0.494891	9.83445	27.6504	9
CC_OL_022_C09	0.0915104	29.718	0.121039		-0.0934452		-0.00682008		-0.0261116		-0.0647568		15.7073	9
CC_OL_022_E03	0.0654378		-0.0373048		-0.0832504		0.0736743		-0.710376	5.31916	-1.11588	6.39063	2.09221	9
CC_OL_023_C23	-0.120216		-0.245191	31.8463	-0.109006		-0.0253398		-0.235644	26.3119	0.433019	9.83445	27.6504	9
CC_OL_023_F09	-0.116176	48.3647	-0.0152935		-0.148955		-0.0840012		-0.62333	11.3424	-1.42356	0	2.09221	9
CC_OL_023_G18	-0.0716192		0.0806553		-0.00932292		0.00976361		-0.00487314		-0.0773213	29.5603	29.2653	9
CC_OL_023_O23	0.00648977		-0.117097		-0.110652		-0.0570919		-0.195993		-0.316817	22.3838	27.6504	9
CC_OL_024_A02	-0.00403176		-0.149117		-0.0131257		0.0268936		-0.666274	1.56915	-2.81676	0	0.760804	9
CC_OL_024_D18	-0.068536		0.00324328		0.215931	20.3752	0.29206	17.4104	-0.0392398		0.189495	22.3838	38.2545	9
CC_OL_024_G10	0.255975	15.9625	0.136002		-0.0559521		-0.0917396		0.206993	37.6844	-0.0991445		49.9559	9
CC_OL_024_P06	0.219161	12.0207	0.0747915		0.156435		-0.0145947		-0.060643		0.0528029	40.5623	46.6954	9
CC_OL_025_D20	-0.126465		-0.261199	34.5567	-0.330293		0.0158164		0.347566	42.1044	0.273071	15.0033	15.7073	9
CC_OL_025_F06	-0.192723	15.9625			-0.176371	37.2031	-0.533779	34.9677	0.323885	34.569	0.548246	9.83445	8.87849	9
CC_OL_025_H05	-0.271902	8.31651	-0.109855		-0.00765626		0.0671187		-0.131437		-0.760497	0.227939	24.012	9
CC_OL_025_N08	0.1102	44.9968	0.127522		-0.325696	14.9963	-0.0945256		-0.0728947		-0.0471321			9
CC_OL_025_N13	-0.187501		-0.111043		0.111366		0.121084		0.0129503		-0.327788	8.05179	18.3434	9
CC_OL_026_A10	0.114149	25.8116	0.134713		0.199829		0.184389	38.5493	0.0267664		-0.351725	9.83445	10.2741	9
CC_OL_026_D10	-0.0202823		-0.0461013		0.102397	46.9822	0.0653644		0.098249		0.307081	12.1023	20.8934	9
CC_OL_027_E20	0.0100762		-0.0637705		-0.343859	16.7058	-0.137169		0.160332	37.6844	-0.179922			9
CC_OL_027_H10	0.149513	15.9625	-0.0047798		0.307555	29.8948	0.0750226		-0.0155545		0.63241	8.05179	29.2653	9
CC_OL_027_K15	-0.112651		-0.0930084		0.0960866		-0.0775105		-0.113288		0.485451	12.1023	29.2653	9
CC_OL_027_N04	-0.14696	25.8116	-0.00897436		-0.0453702		-0.120817	49.7484	-0.376224	7.15844	-0.281011	18.8282	8.87849	9
CC_OL_028_A20	-0.0962339		0.163518		0.0267306		-0.216406	34.9677	-0.0124962		-0.951338	6.39063	14.3906	9
CC_OL_028_B11	0.258486	33.7527	0.157048		0.224228	46.9822	-0.01882		0.385577	34.569	-0.364549	8.05179	15.7073	9
CC_OL_028_J16	-0.0748158		-0.0244513		0.219217		0.246743	26.4536	0.0305336		-0.0386034	47.0896		9
CC_OL_029_C04	-0.153641		-0.124677		-0.0422461		-0.190924		-0.429769	28.6663	-0.51642	37.1539	24.012	9
CC_OL_029_D15	0.32208	25.8116	-0.045894		-0.109947		-0.0772754		-0.802172	1.56915	-1.10733	0	0.760804	9
CC_OL_029_K12	-0.00126983				-0.597151	14.9963	-0.388675	12.4531	-0.247274	37.6844	0.264571	22.3838	43.4785	9
CC_OL_029_O15	-0.0811682		-0.222211		0.202233	26.8456	0.0800612		-0.455315	14.9433	-1.00678	1.68706	3.97255	9
CC_OL_030_H22	-0.0301629		-0.168806	45.1357	-0.015359		-0.0324659		-0.00326516		0.159062	29.5603	27.6504	9
CC_OL_030_L15	-0.121038		-0.41308	15.8136	-0.00935322		-0.0502612		-0.708998	0	-1.46659	0	5.07451	9
CC_OL_030_M11	0.0354218		-0.128274		0.081838		0.0416602		0.0824072		-0.0167039	44.0973		9
CC_OL_031_A11	-0.193144	13.6381	-0.244385	31.8463	-0.132732		-0.150259	34.9677	0.0361707		0.0703285		38.2545	9
CC_OL_031_C01	0.0111012		0.105027		0.0965402		0.100551	42.6069	-0.292966		-1.15335	0.363199	4.35452	9
CC_OL_031_M24	0.00201812		0.0201813		-0.0275514		-0.0804807	49.7484	-0.215481	21.4061	-0.40991	22.3838	7.26894	9
CC_OL_031_N08	-0.161291		0.207379		-0.26597		0.116563		-0.568899	14.9433	-3.40102	0	0.782135	9
CC_OL_032_A10	-0.0281973		-0.288028	5.70962	0.207979		-0.0754008		0.340994	26.3119	-0.434724	22.3838		9
CC_OL_032_D16	0.000161682		-0.0128645		0.0323408		0.311871		-0.59695	19.8042	-2.0636	0	0.760804	9
CC_OL_032_H12														9
CC_OL_032_I20	-0.180608	22.2561	-0.31512		-0.254642	18.2822	-0.0655904		0.219306	42.1044	-0.0745038		40.0133	9
CC_OL_033_B02														9
CC_OL_033_C04	-0.0578008		0.0651127		0.0654149		-0.0938058				1.24517	8.05179		9
CC_OL_033_E16	-0.0543466		0.0119499		0.0497468		-0.060424		-0.33296	28.6663	-0.301417	9.83445	22.1877	9
CC_OL_033_E22	0.222886	25.8116	-0.0144986		-0.383987	11.0134	-0.133584	46.4198	0.0294042		0.35424	15.0033	43.4785	9
CC_OL_033_F12	0.0363871	40.8778	-0.1591		-0.0269056		-0.0101814		-0.348911	6.33755	-0.229263	29.5603	10.2741	9
CC_OL_033_G22	0.209913	19.0265	-0.00502851		0.0699505		0.0524465		-0.151558	42.1044	0.156232	33.2771		9
CC_OL_033_I09	7.35601e-05	48.3647			-0.058541		0.0774386	49.7484	-0.539044	8.3482	-3.7907	0	0.760804	9
CC_OL_034_D03	0.0553522		0.0874307		0.252516	29.8948	-0.0244575		0.265186		0.462077	8.05179	46.6954	9
CC_OL_034_E15	-0.323192	12.0207	0.0680435		-0.292126		-0.106422		-0.434017	6.05829	-0.0265174			9
CC_OL_034_I22	-0.13334	33.7527	0.298842		0.0589476		0.227563	22.1072	-0.306032	16.4559	-0.87595	2.33695	5.93671	9
CC_OL_035_J03														9
CC_OL_001_A01														0
CC_OL_001_A02	0.390153	8.31651	0.328331		0.0222661		0.0860101		0.328234	37.6844	0.809188	4.14154	29.2653	0
CC_OL_001_A03	-0.431991	3.78856	-0.346707	4.59109	-0.117922		-0.0666195		-0.229099	42.1044	-0.227279	49.9057	24.012	0
CC_OL_001_A04	-0.836624	0	-0.322754	34.5567	0.0980478		0.0997704		-0.051722		-0.827304	0.363199		0
CC_OL_001_A05	-0.164564	25.8116	-0.0304526		-0.157701	16.7058	-0.195012	24.6475	-0.609446	5.31916	-1.20316	0.835227	1.62381	0
CC_OL_001_A06	-0.071172		-0.214686		-0.329509		-0.27532	28.1875	-0.147045	34.569	-0.113925	33.2771	31.0409	0
CC_OL_001_A07	0.0913261	33.7527	-0.133783	45.1357	0.0968953		0.0509006		-0.42336	19.8042	-2.26793	0.227939	0.782135	0
CC_OL_001_A08	0.0688905	25.8116	-0.440402	24.3011	0.0419332		0.0403369		0.177055	42.1044	0.402972	15.0033	24.012	0
CC_OL_001_A09	0.0711383		0.106251		0.117619		-0.0311345		-0.0411561		-0.0554157		49.9559	0
CC_OL_001_A10	0.126222		-0.293245	13.9394	0.0492191		-0.00489195		0.0501926		0.249315	44.0973	41.6943	0
CC_OL_001_A12	-0.15751	33.7527	-0.0776877		-0.477263	0.835522	-0.238923	46.4198	0.216428	42.1044	0.277078	22.3838	18.3434	0
CC_OL_001_A13	0.952369	2.32496	0.371731		-0.206424		0.0434918		0.102002		-0.383719	9.83445	0.760804	0
CC_OL_001_A15	-0.0146575		-0.0649137		-0.0417134		0.0482312		-0.145345	42.1044	-0.247231		32.8143	0
CC_OL_001_A16	-0.500286	3.31382	-0.251484											0
CC_OL_001_A17	-0.0221008	33.7527	0.107096		-0.0132715		0.00517928		-0.0778978		0.472118	9.83445	46.6954	0
CC_OL_001_A18	-0.687404	5.5422	0.128668		0.128057		-0.0571846		0.00357924		0.189383	29.5603	12.5609	0
CC_OL_001_A19	-0.14878		-0.077167		0.218716	42.2193	0.218104	42.6069	0.12437	42.1044	-0.194841	22.3838		0
CC_OL_001_A20	-0.586482	10.3357	-0.714746	12.0608	-0.342655	16.7058	-0.34945	10.4046	0.247375	37.6844	1.06121	12.1023	3.38315	0
CC_OL_001_A21	0.218869	15.9625	0.20703		-0.0533076		0.0211546		0.130213		0.414508	22.3838		0
CC_OL_001_A22	0.234706	8.31651	0.225364		0.335355	13.5015	0.280012	14.0943	0.0772442		-0.750707	2.6814	2.09221	0
CC_OL_001_A23	0.0319902	37.5172	-0.24506	37.0587	-0.118466	33.8404	-0.175886		0.252687		0.0545585		41.6943	0
CC_OL_001_A24	-0.192359	10.3357	-0.0338188		-0.145457		-0.00622011		-0.467882	5.31916	-1.43021	0	2.09221	0
CC_OL_001_B01	-0.0459		-0.307646	28.7086	-0.174415	42.2193	0.097029		0.060955		0.735632	5.33638	10.2741	0
CC_OL_001_B02	0.0705309	44.9968	-0.257059	45.1357	-0.304963	42.2193	-0.0935865		-0.0219214		0.0963136			0
CC_OL_001_B03	-0.0421987		-0.40805	24.3011	-0.0240726		-0.0259817		-0.0907412		-0.489044	37.1539		0
CC_OL_001_B05	-0.142052				0.113471	46.9822	0.12614		-0.310071		0.203923			0
CC_OL_001_B06	0.351668	10.3357	-0.253211	37.0587	0.0434033		-0.129602		0.0425585		-0.459379	12.1023	17.0611	0
CC_OL_001_B08	0.0713762		0.0146007		-0.223705	33.8404	-0.200742	42.6069	-0.162007		0.0509947		49.9559	0
CC_OL_001_B09	0.0750746	25.8116	0.0785935		0.0418308		0.085278		-0.0528384		0.0513732	40.5623		0
CC_OL_001_B10	-0.0870266	40.8778	0.17574		0.0317554		0.0469064		0.250895		0.14084	22.3838	25.8284	0
CC_OL_001_B11	-0.505563	10.3357	-0.136379		-0.357362		-0.297584	42.6069	-1.52804	0	-2.24975	0	0.760804	0
CC_OL_001_B13	0.107498	25.8116	-0.0406063		0.0639173		0.0624917		0.249159	46.4921	0.150827	33.2771		0
CC_OL_001_B15	-0.322087	15.9625	-0.159241		0.207747		-0.017746		-0.194481	46.4921	-0.454832	8.05179	46.6954	0
CC_OL_001_B17	-0.229128	48.3647	0.00637175		0.092329		-0.00452741		-0.266203		-0.306642	4.14154	29.2653	0
CC_OL_001_B18	0.385742	6.38553	-0.151679	45.1357	0.0139938		-0.197437	49.7484	0.222622	42.1044	-0.0512959			0
CC_OL_001_B19	0.315074	25.8116	0.0237945		-0.0568074		-0.162164		0.470254	46.4921	0.731406	6.39063	32.8143	0
CC_OL_001_B20	-0.335521	13.6381	0.122167		-0.010626		-0.109859	46.4198	-0.139057	42.1044	0.0234385		45.0807	0
CC_OL_001_B21	-0.135423	48.3647	0.115554		0.0419061		0.112804		-0.139094	37.6844	-0.019237			0
CC_OL_001_B22	0.132002	13.6381	-0.0322022		0.217873	18.2822	0.226451	31.3506	-0.098631		0.135394	37.1539		0
CC_OL_001_B23	-0.0905127		0.0174924		-0.105576		0.0233296		-0.0463785		-0.419874	9.83445	17.0611	0
CC_OL_001_B24	-0.0129784		-0.110114		0.00418469		-0.141305	34.9677	0.0427151		0.0746278			0
CC_OL_001_C01	-0.423079		0.456169		0.133582	33.8404								0
CC_OL_001_C03	-0.830661	6.38553	-0.0663498		-0.453878		-0.084758				0.120857	40.5623	27.6504	0
CC_OL_001_C04	-1.21164	5.5422	-0.307799	24.3011	0.129359		0.147723		-0.0401518		-0.516479	15.0033	45.0807	0
CC_OL_001_C05	-0.0951716	37.5172	-0.404902		0.247626		-0.0670375		0.083439		-0.380824	12.1023		0
CC_OL_001_C06	0.259667	7.17452	0.488302		0.201645		0.0610086		-0.25236	34.569	-0.105418		4.35452	0
CC_OL_001_C07	0.141946	19.0265	0.338518		0.3336	42.2193	0.208542	46.4198	0.19786		-0.886894	4.14154	4.35452	0
CC_OL_001_C08	0.261393	8.31651	0.0650731		-0.036986		0.034896		-0.287405	28.6663	-0.773532	3.22942	0.760804	0
CC_OL_001_C09	-0.014811		0.0701156		0.0792935		-0.0201696		0.193936		0.396948	12.1023	24.012	0
CC_OL_001_C10	-0.161296		-0.104513		0.247095	23.4001	0.174025	31.3506	0.213815		0.29798	12.1023	36.5087	0
CC_OL_001_C11	-0.0159112		0.0963887		-0.0198891		0.186238	22.1072	0.230108	37.6844	0.214399	18.8282	29.2653	0
CC_OL_001_C12	0.377641	3.78856	0.20653		0.183329		0.278542	10.4046	0.0888584		-0.0636555		11.557	0
CC_OL_001_C13	0.132093	44.9968	0.103243		0.207485	37.2031	0.251847	17.4104	0.364865	37.6844	0.287514	12.1023	31.0409	0
CC_OL_001_C14	-0.02951		-0.210584	49.244	0.0362916		0.398952	31.3506	-0.652868	11.3424	-0.513245	15.0033	25.8284	0
CC_OL_001_C15	-0.0283635		0.0414446		0.16167		0.110798	49.7484	-0.123516	42.1044	-0.132367	33.2771	11.557	0
CC_OL_001_C16	0.391916	5.5422	0.104367		-0.00429351		-0.158462	42.6069	-0.202769	42.1044	-0.0419339		7.26894	0
CC_OL_001_C18	0.326806	19.0265	0.142469		0.126926	42.2193	0.024931		-0.0371861		-0.373631	25.9325	0.782135	0
CC_OL_001_C19	0.0549182	25.8116	0.155429		-0.147689	37.2031	0.0222618		-0.140135		-0.0410416			0
CC_OL_001_C21	-0.00100366		0.134495		0.140576		0.151428	38.5493	0.0676126		0.0817535	44.0973	45.0807	0
CC_OL_001_C23	0.279087	19.0265	0.0235535		-0.158852		0.0308356		0.235329	37.6844	0.185733	18.8282		0
CC_OL_001_C24	0.179954	19.0265	-0.046655		0.176748		-0.089855		0.128349	46.4921	-0.195168	25.9325	24.012	0
CC_OL_001_D01	-0.590282		0.0900794		-0.322412	20.3752			0.358903	37.6844			31.0409	0
CC_OL_001_D02	-0.0820738		-0.00270133		0.017441		-0.0606783		0.0721502		-0.391439	5.33638	24.012	0
CC_OL_001_D03	0.0167703		0.0624504		-0.0472913		-0.13549	31.3506	-0.55089	14.9433	0.510969	15.0033		0
CC_OL_001_D04	0.222011	33.7527	0.197067		0.0200122		-0.0695588		-0.241512	19.8042	-0.884881	18.8282	1.62381	0
CC_OL_001_D05	0.0603369		0.0324021		0.361537	20.3752	0.128174	46.4198	0.0541664		-0.298174	40.5623	43.4785	0
CC_OL_001_D07	-0.475135	1.17587	-0.498262	2.29555	-0.199076	42.2193	-0.28035	10.4046	-0.113357		-0.470051	15.0033		0
CC_OL_001_D10	-0.0645912	44.9968	-0.444482	17.2634	-0.0370134		-0.0983012	31.3506	0.394568	37.6844	0.0379573	40.5623	32.8143	0
CC_OL_001_D11	-0.0867531		0.0818664		-0.0697302		0.0465028		-0.0754014	31.2984	-0.0702143	44.0973	34.526	0
CC_OL_001_D12	-0.212764	48.3647	0.0641557		-0.120166		-0.202433	26.4536	-0.243962	31.2984	0.0224055			0
CC_OL_001_D13	-0.264273	12.0207	-0.326526	7.3077	-0.341355	9.15258	-0.547814	3.62885	-0.457381	5.31916	-0.0543138			0
CC_OL_001_D14	-0.787796	2.2718	0.0142995		0.392513	4.42277	0.487411	10.4046	0.72395	24.385	0.0963979	44.0973	15.7073	0
CC_OL_001_D15	-0.638441	10.3357	-0.341736	49.244	0.0338939		0.204561	46.4198	-0.346546	46.4921	-0.0502134		43.4785	0
CC_OL_001_D16	-0.0808059		-0.0309142		-0.120491		0.067124		0.109248		0.545827	4.14154	14.3906	0
CC_OL_001_D17	-0.0512675		-0.305082	37.0587	0.0864715		0.0617984		0.124917		-0.152472	44.0973		0
CC_OL_001_D18	-0.378043	3.78856	-0.297478	24.3011	-0.0230837		0.033859		-0.0829267		0.162526	37.1539	20.8934	0
CC_OL_001_D19	-0.0150719		-0.124499		0.020875		-0.113315		0.0918144		-0.111131			0
CC_OL_001_D20	-0.223274	19.0265	-0.0744701		0.082472		-0.206115	26.4536	0.172488		0.257738	33.2771	27.6504	0
CC_OL_001_D21	-0.195725		-0.212585	45.1357	-0.595355	29.8948	-0.229074	46.4198	0.0533721	37.6844	0.160349	37.1539	27.6504	0
CC_OL_001_D22	-0.911573	5.5422	-0.363919	28.7086	0.0913701	42.2193	0.4932	14.0943	0.0930658		-0.175025	44.0973	27.6504	0
CC_OL_001_D23	0.0333476	40.8778	0.132751		0.106456		0.164972	31.3506	0.493222	21.4061	0.736911	6.39063	3.97255	0
CC_OL_001_D24	0.196383	22.2561	0.170342		0.0265006		0.119061	34.9677	0.0881914		-0.105457		27.6504	0
CC_OL_001_E01			0.137285		0.0123898		0.0121662				0.718519	12.1023		0
CC_OL_001_E03	-0.0572009		-0.115903	49.244			-0.0392705		0.0739972	37.6844	-0.184204			0
CC_OL_001_E06	0.0640719	37.5172	0.285032		-0.0074811		-0.280246		-0.375533	6.33755	-1.247	0	0.760804	0
CC_OL_001_E07	-0.543639	1.84902	-0.552107	11.3554	-0.38708	2.38721	-0.54418	6.78638	-0.637184	1.56915	-0.963778	0	40.0133	0
CC_OL_001_E08	-0.137681		-0.265904	49.244	-0.0588668		-0.0795113		-0.544729	1.3948	-0.692423	3.22942	6.34878	0
CC_OL_001_E09	-0.230979	37.5172	-0.165653		-0.192255	13.5015	-0.0852236		0.148396		0.525413	8.05179	5.93671	0
CC_OL_001_E10	-0.2259	25.8116	-0.13855	40.2379	-0.0253414		0.0219987		-0.410054	26.3119	0.0148628		43.4785	0
CC_OL_001_E11	0.190055	25.8116	0.263903		0.297053	13.5015	0.165564	31.3506	0.160329		0.257529	18.8282		0
[truncated: 11,444 more rows]
